# Supplementary material for: Development of a bioinformatics platform for analysis of quantitative transcriptomics and proteomics data: the OMnalysis
Source: PeerJ. 2021 Nov 9;9:e12415. doi: 10.7717/peerj.12415 (PMC8588854; doi:10.7717/peerj.12415)
Supplement: Supplemental Information 6 [file peerj-09-12415-s006.xlsx]

## Sheet: Treatment1
UniProt ID	FDR-adjusted P-value	Fold Change
Q8SPP7	4.53e-10	3304.75
P54229	1.88e-08	1443.53
P56425	1.6e-06	1217.04
P22226	2.83e-08	1026.23
Q2TBU0	3.75e-08	996.841
F1N465	0.00148671	527.212
E1BCU6	1.51e-06	401.117
Q9TU03	0.000156278	312.755
P52176	0.000108452	219.216
P33046	0.000265995	208.101
Q0VCG9	1.52e-08	193.704
Q58CQ9	0.000849641	188.594
G3MXK8	0.00121171	166.973
Q28085	0.00159231	136.78
Q3SZV7	4.88e-06	130.956
Q29437	0.000204768	124.91
E1B999	0.000892182	113.633
A5PJH7	0.000263771	106.781
F1MKS5	0.000607452	105.962
G3MWP1	7.52e-06	104.448
Q8SQ28	3.52e-05	92.6071
E1BAG3	0.00535541	89.4159
E1BKS1	0.000413067	86.075
P19660	0.0057626	77.6197
P19035	0.00700333	75.2485
Q7SIH1	0.000223813	68.1773
E1B6Z6	7.76e-10	67.2793
P02584	0.00336022	57.5498
P48616	2.19e-05	52.0313
P07589	3.48e-05	51.4976
F1MNW4	0.00261167	50.6054
A4IFB6	0.00328328	45.1501
O77482	0.000226836	30.2419
Q2TBI0	0.00023922	27.9267
E1B8B5	0.0033194	23.4286
F1MMW8	0.000451309	20.2593
F1N4M7	0.00145168	19.8434
Q3T052	0.00457604	13.4649
P63258	5.61e-06	9.82231
Q2KIF2	0.00470745	7.67918
P15497	2.95e-05	6.29142
G3N0V0	0.000636062	6.02572
P28800	3.88e-05	4.94141
Q29443	0.000191703	4.27771
F1N076	3.41e-05	3.51398
Q2KIT0	0.00167464	3.24938
Q2KIU3	0.000953264	3.21455
P81187	0.000102797	3.16488
Q3SX14	0.00370471	3.08374
Q2KJF1	0.000107615	3.06753
G8JKW7	0.00234025	2.73902
O46375	0.00299574	2.42658
Q5J801	0.00359091	2.285
Q2KJ62	0.00579681	2.21526
P50448	0.00594838	-2.46537
Q03247	0.00644645	-3.14519
P02754	0.00288394	-3.3887
Q3ZCH5	0.000695147	-3.527
Q0P569	0.000263971	-3.54803
Q0IIH5	0.000112355	-3.70254
P80195	0.000976054	-3.80965
P81265	0.00019847	-6.01779
Q3MHX6	0.00486752	-6.26343
P10790	0.000324267	-6.59384
Q8WML4	0.00268021	-37.5626
P13696	0.00177996	-39.0916
Q9XSG3	4.98e-05	-50.4045
Q9TUM6	0.00204524	-61.0639
E1BLC6	0.00425546	-66.9255
F1N1D2	0.00463246	-76.9992
O18738	0.00121081	-77.3684
P26201	0.000103282	-87.2324
E1B9W6	0.00253015	-145.315
F6PZ29	0.00308087	-191.176
F6QEL0	0.000181417	-204.181
E1BN90	0.00455729	-214.044

## Sheet: Treatment2
UniProt ID	FDR-adjusted P-value	Fold Change
Q0VCG9	4.65e-11	962.564
Q8SPP7	3.72e-11	8453.44
P48616	0.000648309	19.9968
Q3ZCL8	0.000594495	17.0444
E1B6Z6	1.38e-11	151.263
Q2TBU0	5.2e-10	4794.21
Q9XSJ4	4.37e-07	216.069
P54229	1.46e-10	9208.72
P63258	6.91e-09	27.2426
G3MWP1	9.74e-07	195.481
A6QLL8	1.46e-05	149.408
P22226	7.61e-10	3811.71
Q0VCW4	1.1e-05	171.081
P56425	1.7e-08	8922.48
P81265	6.84e-06	-9.99393
F1MM32	0.00035047	6.23125
O77482	7.86e-06	80.0757
P10096	0.00358276	19.4543
A5PJH7	7.27e-06	452.485
E1BCU6	6.14e-08	1291.56
P81187	5.98e-06	4.10452
Q2TBI0	4.88e-06	84.3344
P80195	4.78e-05	-5.67742
P02754	0.000276251	-4.70497
Q3ZBD7	0.00248869	48.4098
Q762I5	0.000417304	103.477
P35541	0.00154593	49.2258
Q8SQ28	3.36e-06	201.373
Q5E9F7	0.00112532	76.4953
E1B8B5	1.13e-05	180.769
A7Z014	0.00173511	41.6563
F1MMW8	9.5e-06	58.0608
E1BF48	0.000537489	112.827
E1BI67	0.00038377	147.311
P80724	0.00210505	47.1059
P52176	7.07e-06	708.212
F1MYX5	0.000163009	187.753
P10790	8.71e-05	-8.21178
P02253	0.00622739	34.8924
P33046	1.08e-06	2618.88
Q9TU03	3.76e-05	614.498
P02584	8.79e-05	317.601
P17697	0.00327738	-3.48603
P15497	4.7e-06	8.0238
Q0P569	6.92e-06	-5.27739
Q3SZV7	2.99e-06	152.541
Q3MHX6	0.00054249	-10.344
P28800	8.39e-06	5.91377
A6QPZ4	0.00151901	27.6696
P29392	0.00812873	-42.0325
F1N076	4.33e-06	4.24471
G3N0Q8	0.002023	126.211
Q3ZCH5	9.06e-06	-5.921
F1MKS5	6.27e-06	775.432
P07589	2.31e-05	57.9529
Q2KJF1	2.94e-05	3.44468
P02769	0.00102185	2.18248
P80457	0.0106477	-14.9918
E1BKS1	0.00175547	47.1419
Q1LZB8	0.00915555	-7.10496
P19660	3.86e-05	1159.26
Q29437	9.2e-06	440.66
P02192	0.00185939	-2.1375
Q2KJ62	0.000868077	2.69158
O18738	0.00117341	-78.4812
P02672	0.00363872	4.6095
G3MXK8	0.000619214	238.478
F1MX83	0.00793746	32.3149
Q29443	2.74e-05	5.42145
Q7SIH1	1.77e-05	169.518
P26201	0.000103282	-87.2324
A4Z945	0.00169699	162.204
Q2KIU3	0.000755362	3.30411
Q0IIH5	4.24e-05	-4.10096
E1B805	0.000410804	71.8041
A4IFB6	3.61e-05	322.932
Q2KIT0	0.000201163	4.23964
E1BAG3	0.000399195	388.292
F6QEL0	0.000929552	-97.1733
P13696	0.000234143	-86.9374
F1N1F8	0.00565442	661.021
P19035	0.0031963	119.503
Q0VCX2	0.00211543	-73.4919
E1BF59	0.00465605	68.2536
F1MCC8	0.000529149	1144.35
A6QPQ2	0.000544273	158.155
E1BAU6	0.00118032	-2.24808
P50448	0.00654029	-2.43698
E1B999	0.0011413	101.021
O46375	0.00649666	2.23186
Q28085	0.00139571	146.749
Q3T052	0.00115986	21.035
G8JKW7	0.00103	3.00855
G3N0V0	0.000343713	6.699
Q8WML4	0.00182815	-44.1662
E1BEQ4	0.00178277	70.7413
F1N5M2	0.00373625	2.18009
G3X894	0.00787093	43.8957
F1MNS0	0.00256824	-58.3627
E1BN90	0.00411341	-229.682
F6PZ29	0.00283516	-201.464
Q9TTE1	0.000806842	2.32077
Q58CQ9	0.000675895	212.528
F1MNW4	0.000251313	142.901
F1N4M7	0.000646057	25.6485
P63048	0.00324974	-69.7036
F1N465	0.00060364	961.131
E1BND5	0.00034131	81.1384
P80025	0.00383809	-3.70439
Q3SX14	0.000853817	3.76375
Q3ZBS7	0.00154121	65.8394
Q5J801	0.00110855	2.56883
Q2KIF2	0.00381222	8.1159
F1N1D2	0.00463246	-76.9992
F1MI18	0.00856891	57.5066
P08037	0.00192624	-50.8383
Q32L76	0.00291826	65.6075
Q28013	0.00717965	32.6784
Q3ZEJ6	0.00811874	7.56249
P01030	0.00334203	43.9383
A5PKC2	0.00763313	25.6165
G3N0S9	0.0032089	77.6513
F1N084	0.0103011	-11.788
A6QPP2	0.00855001	26.9918
Q0VCM5	0.0104139	33.2534
P02702	0.00559474	-34.8562

## Sheet: Treatment3
UniProt ID	FDR-adjusted P-value	Fold Change
P67808	8.18e-14	66.4387
E1BLI9	5.69e-10	605.241
Q0VCG9	2.62e-11	1141.78
P62261	1.13e-09	389.881
Q3B7N2	2.48e-07	111.568
Q8SPP7	1.97e-12	27478.6
F1MV90	2.3e-09	413.735
P48616	8.17e-11	2154.79
Q3ZCL8	4.46e-09	406.723
E1B6Z6	1.41e-11	150.561
Q9BGI1	1.39e-08	216.908
Q3ZBT0	1.88e-08	24.9855
Q2TA49	1.32e-08	196.745
Q2TBU0	2.95e-11	14937.3
Q9XSJ4	6.74e-10	1700.03
Q2HJ49	2.33e-08	1204.43
P54229	3.43e-11	16617.7
P63258	8.53e-11	56.8519
Q3SYX9	6.55e-06	29.004
G3MWP1	8.96e-09	869.453
A6QLL8	2.29e-08	1443.72
P22226	1.4e-10	7281.31
Q0VCM4	0.00075341	14.6348
P68250	1.76e-06	116.469
Q0VC51	4.45e-08	213.006
Q0VCW4	2.19e-08	1547.1
Q3T186	8.13e-06	82.7637
E1BCN3	0.0115918	3.53158
Q3MHR7	0.000766446	17.9227
Q76LV2	1.38e-07	725.798
P21856	0.0107476	6.37751
P56425	9.06e-09	11877.2
F1MW44	0.000562467	15.4529
P81265	2.01e-08	-24.5346
F1MM32	3e-08	28.7979
P30922	4.83e-05	76.9916
O77482	6.68e-08	324.645
A5D984	5.68e-07	868.757
P10096	4.3e-07	416.377
A5PJH7	1.94e-07	1967.14
A4FUA8	0.000185668	49.8298
E1BCU6	4.84e-08	1411.57
Q9XSK7	0.000139051	47.7992
P81187	1.2e-08	7.36206
Q0P5E0	0.000129624	69.4244
Q2TBI0	2.4e-08	395.392
P80195	1.56e-07	-12.0077
A5D7A0	7.4e-07	617.186
P02754	2.23e-07	-12.2492
Q3ZBD7	4.53e-07	1854.9
Q3SZK8	0.00232275	7.91243
Q762I5	7.43e-07	1450.73
P35541	5.7e-07	1178.41
P11116	0.00457273	9.6221
Q8SQ28	1.64e-07	556.13
P00711	4.67e-06	-1021.82
Q2KJI3	2.61e-05	143.27
Q3T149	0.002626	15.5694
Q03247	0.00672703	-3.12419
Q5E9F7	8.66e-07	1686.75
Q0VBZ9	0.00323562	6.26885
P61157	0.00425462	17.5042
E1B8B5	5.87e-07	512.151
P60661	0.00353895	13.6859
P62157	3.59e-05	274.35
Q3ZCI4	0.000848109	40.8699
P25326	2.46e-05	133.338
O77834	0.00368344	20.1605
A7Z014	5.68e-07	949.707
F1MMW8	1.01e-06	106.739
F1N169	0.00450471	11.9616
E1BF48	1.82e-06	1340.39
E1BI67	9.86e-07	2094.91
F1MF78	0.00480542	11.6028
P80724	1.76e-06	873.069
P52176	6.95e-05	265.58
Q5E9F5	0.00343724	13.2091
F1MYX5	3.85e-07	2577.78
P10790	3.42e-07	-20.5497
A5D7D1	0.0038029	60.1745
P02253	4.11e-06	878.478
P40673	0.00634388	17.284
P33046	3.01e-07	4753.41
Q9TU03	4.99e-07	4747.56
P02584	9.99e-07	2403.75
P17697	0.0170243	-2.68431
P15497	1.65e-05	6.79256
Q0P569	2.07e-07	-7.76249
Q3SZV7	2.11e-06	170.076
Q3T114	8.35e-06	1360.4
Q3MHX6	8.02e-07	-42.117
F1N1Z8	0.000286509	126.651
P02676	2.07e-05	13.1378
P28800	6.87e-05	4.619
A6QPZ4	1.38e-05	138.831
Q32LE5	0.0197914	11.4721
P29392	0.00012937	-326.957
Q2TBL6	0.000191813	117.425
Q3T0K1	0.00366118	14.811
Q3ZCJ8	7.02e-06	2530.06
F1N076	2.99e-06	4.39122
G3N0Q8	0.000141573	511.003
Q5E9B1	8.01e-05	162.423
P68103	0.00201433	38.7366
P19120	0.00293336	45.6338
Q3ZCH5	4.39e-06	-6.45078
F1MKS5	6.56e-06	760.412
P07589	4.54e-06	92.4955
Q2KJF1	4.31e-05	3.32954
P02769	0.00196999	2.06985
P80457	1.42e-05	-171.576
E1BKS1	4.89e-06	507.524
Q1LZB8	3.2e-05	-31.1745
P19660	1.22e-05	2103.7
Q148J6	0.0159463	19.4933
Q29437	1e-05	426.057
Q2HJF0	0.000104222	130.823
P02192	1.79e-05	-3.10636
F1MGU7	0.00261809	3.38882
Q2KJ62	0.00168741	2.51812
O18738	0.000112327	-221.96
O97680	0.000619452	73.315
Q27975	0.0155708	14.5219
Q3SZI4	0.000419162	60.6264
P02672	1.7e-05	11.8881
G3MXK8	0.00208223	124.599
Q3SZ62	0.000320512	187.104
Q92176	4.1e-05	166.543
F1MX83	8.2e-05	260.633
Q29443	4.92e-05	5.05039
Q7SIH1	3.85e-05	128.321
Q2M2T1	0.000225489	73.4967
E1BIL7	9.54e-05	150.883
P26201	0.000103282	-87.2324
E1B9W6	0.00254298	-144.889
Q9TUM6	0.000221512	-165.852
G5E537	0.000524266	169.8
A4Z945	0.000260475	449.922
P18892	9.37e-05	-91.7943
Q2KIU3	0.000757961	3.30277
Q0IIH5	0.000147816	-3.5969
Q5E956	0.000492066	274.465
P31976	0.00155487	64.4545
E1B805	0.000754318	56.4973
A6QLB7	0.00547082	21.0935
A4IFB6	0.000311413	128.861
Q2KIT0	0.000996025	3.47289
Q1JPB0	0.000899134	91.6148
E1BAG3	0.000690703	287.502
F6QEL0	0.000636071	-115.724
P13696	0.00213288	-36.3204
F1N1F8	0.000588734	4311.56
P46193	0.00240409	48.2056
P19035	0.000765338	267.548
E1BMC6	0.00684744	35.5326
Q0VCX2	0.00192999	-76.8457
E1BF59	0.000355754	259.762
F1MCC8	0.00727541	186.025
Q3SYW2	0.00606859	18.6118
F1MVJ8	0.001695	24.1532
F1MV51	0.00100873	-1216.7
A6QPQ2	0.000215038	245.88
E1BAU6	0.00128587	-2.23184
P50448	0.00103426	-3.02637
E1B999	0.00690322	41.3714
Q28085	0.000135522	491.003
G3MXB5	0.00552694	-64.2433
P10103	0.00630739	47.1121
Q3T052	0.000259962	33.5068
E1BCS3	0.00287572	30.0861
G8JKW7	0.00130894	2.92797
G3N0V0	0.000778216	5.81828
Q3T035	0.00664828	36.2852
F1MLU7	0.00345458	-56.1482
E1BGZ9	0.00278405	-336.752
Q8WML4	0.00023494	-102.121
E1BEQ4	0.0054793	41.1909
F1N5M2	0.00360455	2.18767
G3X894	0.00928263	40.1422
A8YXY3	0.00147422	-118.187
F1MNS0	0.00256824	-58.3627
E1BN90	0.00101384	-584.872
Q2KIW1	0.00867342	65.9039
F6PZ29	0.000390123	-674.711
Q9TTE1	0.000333569	2.49679
Q58CQ9	0.000625796	221.217
F1MNW4	0.00100343	77.9625
Q8SQ24	0.000723753	-3029.55
F1N4M7	0.0137675	9.298
F1MCG9	0.00215104	84.4142
F1MY85	0.000392454	210.363
Q95132	0.0206439	11.2191
C4T8B4	0.00775644	45.3545
E1BNS8	0.00303556	-4740.87
P80025	0.00264402	-3.93499
Q3SX14	0.00128666	3.56345
Q3ZBS7	0.00117245	74.4886
Q5J801	0.00800922	2.10211
G3X746	0.012044	95.0243
Q76LV1	0.010194	24.5062
F1MX87	0.0079622	28.7598
Q2KIF2	0.00193039	9.66816
F1MDM0	0.00255654	241.364
F1N1D2	0.00463246	-76.9992
Q3ZBZ1	0.00130485	-47.7354
F1MI18	0.0184376	36.2234
Q58DJ3	0.00214955	-823.665
E1BLC6	0.00425546	-66.9255
E1BA36	0.00069506	200.96
Q3ZC66	0.00151129	-6093.67
P41541	0.00115615	-471.719
Q32L76	0.0165553	26.5141
Q58DD4	0.00299829	-29.8715
F1MP13	0.00486627	500.008
Q32KV6	0.000879239	-293.714
Q58D62	0.00394745	62.8712
P06868	0.00357311	75.9558
Q3ZEJ6	0.0115541	6.81849
E1BPI7	0.00745704	102.893
P02668	0.00937736	-4.90805
P01030	0.00635929	32.5112
P21752	0.00235855	329.706
F1N084	0.0103011	-11.788
A8YXZ2	0.0178246	26.7411
P79345	0.00477428	-215.156
P00978	0.0162828	26.1179
F1MWI1	0.00619393	140.634
E1BJH3	0.00448833	198.177
G3N0K5	0.0155955	-40.916
A6QPP2	0.00896685	26.3839
Q0VCM5	0.0181639	24.622
G3N055	0.0180173	136.912
E1BK12	0.0195274	-20.4125
Q9MZ06	0.00680913	-3.25954
P62326	0.0178113	48.1917
Q10741	0.0200962	53.589
Q29RU4	0.016925	51.0008

## Sheet: Treatment4
UniProt ID	FDR-adjusted P-value	Fold Change
P67808	1.07e-14	93.6558
E1BLI9	7.55e-13	4846.5
Q0VCG9	3.24e-10	549.601
P19858	1.37e-12	315.857
P62261	5.13e-11	939.584
Q3B7N2	5.12e-11	1193.34
Q8SPP7	6.26e-12	17090.3
F1MV90	2.9e-10	752.231
P48616	2.23e-12	7549.11
Q3ZCL8	5.31e-10	759.291
E1B6Z6	1.08e-10	99.0392
Q9BGI1	7.52e-10	481.339
Q3SYV4	4.24e-11	115.856
Q3ZBT0	1.13e-09	39.7425
Q2TA49	1.07e-09	384.512
Q2TBU0	6.08e-12	28857.7
Q9GMB8	5.69e-11	106.102
Q9XSJ4	3.86e-11	4618.64
Q2HJ49	2.09e-09	2905.38
P54229	8.01e-11	11722.1
P24627	5.77e-07	5.46485
P63258	2.39e-11	71.3546
Q3SYX9	1.81e-09	189.292
G3MWP1	1.19e-08	791.291
A6QLL8	8.85e-10	4917.89
P22226	4.27e-10	4742.71
Q0VCM4	1.09e-09	499.515
P68250	4.55e-09	687.5
Q0VC51	1.98e-08	266.692
Q0VCW4	3.86e-09	2962.21
Q3T186	5.99e-09	727.743
E1BCN3	7.82e-10	62.7417
Q3MHR7	2.89e-09	600.507
Q76LV2	9.54e-09	1904.36
P21856	2.07e-09	311.909
P56425	2.64e-08	7315.58
F1MW44	1.49e-08	230.5
P81265	9.54e-06	-9.50676
F1MM32	1.98e-09	46.3004
G5E5T5	0.00595382	2.07645
P30922	2.02e-07	462.378
O77482	5.28e-07	175.456
A5D984	4.53e-08	2341.68
P10096	8.57e-09	1634.78
A5PJH7	4.74e-07	1362.98
A4FUA8	4.34e-08	784.753
E1BCU6	4.01e-08	1515.49
Q9XSK7	5.37e-08	582.257
P81187	4.31e-09	8.15095
Q0P5E0	1.06e-07	809.904
Q2TBI0	3.83e-09	692.831
P80195	3.92e-09	-19.9698
A5D7A0	9.14e-08	1354.17
P02754	7.57e-09	-19.7179
Q3ZBD7	5.69e-08	4533.02
Q3SZK8	5.72e-06	30.4742
Q762I5	1.94e-06	970.98
P35541	1.7e-07	1925.6
P11116	1.27e-07	159.785
Q8SQ28	8.18e-09	1585.37
P00711	5.81e-08	-7359.96
Q2KJI3	5.73e-07	558.693
Q3T149	1.84e-07	279.339
Q03247	0.01032	-2.91813
Q5E9F7	8.62e-08	4635.87
Q0VBZ9	1.37e-06	31.3646
E1B8N6	9.9e-08	190.332
P61157	1.59e-07	533.526
E1B8B5	4.53e-08	1295.83
P60661	1.95e-07	256.43
P62157	2.77e-07	2049.64
Q3ZCI4	1.16e-05	190.692
A5D9E9	1.67e-07	430.914
P25326	5.37e-06	226.2
O77834	2.52e-07	550.022
G3MZ19	0.000250348	169.027
A7Z014	3.62e-08	2843.05
F1MMW8	1.38e-08	357.832
G3N3D4	1.49e-07	124.964
F1N169	2e-05	59.4199
E1BF48	3.22e-06	1046.96
E1BI67	5.85e-07	2648.27
Q8HXK9	2.15e-07	126.711
F1MF78	3.56e-07	185.913
P80724	9.89e-07	1106.2
P52176	0.014785	22.8905
Q5E9F5	4.4e-07	183.32
F1MYX5	7.26e-08	5417.09
Q27970	4.28e-07	64.6662
Q3T0Q4	3.37e-07	232.137
P10790	1.78e-07	-22.9454
A5D7D1	2.56e-05	655.595
P02253	4.9e-07	2203.46
Q3MHL4	2.67e-07	225.033
P42899	7.17e-07	47.3733
Q2HJ60	5.78e-07	287.082
P40673	9.86e-07	382.335
P33046	8.29e-07	2963.19
Q9TU03	1.79e-07	7794.27
Q2HJH2	1.25e-05	51.7162
A5PJT7	1.19e-06	27.5663
Q2KJD0	1.25e-06	56.3658
Q5E9G3	1.34e-06	58.8766
Q4U5R3	1.36e-06	55.4957
P79136	1.46e-06	97.8273
P02584	3.68e-07	3798.55
Q5E947	1.04e-05	56.8139
Q2KJH4	2.01e-06	76.9303
P15497	0.000688699	4.11834
Q0P569	0.000320526	-3.47244
Q3SZV7	2.69e-06	157.641
Q3T114	2.19e-06	2575.82
Q3MHX6	0.000333383	-11.5137
P07688	1.35e-06	185.839
F1N1Z8	1.79e-05	406.799
P02676	9.87e-05	9.89549
P28800	0.00206192	3.05964
A6QPZ4	6.16e-07	398.721
Q32LE5	0.000105333	83.4437
P25417	0.00125374	51.5438
P26779	0.0148283	16.6562
P29392	0.00012937	-326.957
Q2TBL6	4.74e-06	513.091
Q3T0K1	2.43e-05	70.9587
Q3ZCJ8	3.11e-06	3839.42
F1N076	1.76e-05	3.73311
G3N0Q8	2.27e-05	1298.03
Q5E9B1	6.14e-06	448.756
P68103	7.55e-06	342.775
P28783	1.17e-05	53.1136
P19120	9.9e-05	198.87
Q3ZCH5	4.54e-05	-4.89423
F1MKS5	2.21e-05	450.628
P07589	1.67e-05	63.6095
Q2KJF1	0.00225242	2.31654
A4IF97	8.54e-06	80.2876
E1BG05	4.06e-06	69.0201
P80457	0.00012712	-79.034
E1BKS1	3.49e-05	232.408
Q1LZB8	5.5e-06	-48.3532
P79105	4.19e-05	527.999
P19660	1.88e-05	1682.69
Q148J6	8.65e-06	503.244
Q29437	2.58e-05	290.362
F1MBS3	1.29e-05	47.9799
Q3T0I4	1.4e-05	19.7633
Q2HJF0	3.66e-05	196.283
P02192	1.06e-05	-3.23879
F1MGU7	0.00741017	2.90984
O18738	0.00405404	-44.0961
Q08DP0	2.1e-05	62.2378
O97680	5.21e-05	199.64
Q27975	0.000514935	57.9258
Q3ZCJ7	9.03e-06	255.307
Q3SZI4	4.64e-05	137.293
P02672	0.000113465	8.5798
G3MXK8	0.000331401	330.668
Q3SZ62	1.69e-05	722.492
Q92176	1.57e-05	239.054
F1MX83	3.29e-05	387.331
Q29443	0.0003515	3.96881
Q7SIH1	7.41e-05	101.557
Q2M2T1	0.00258998	29.0728
E1BIL7	0.00275864	37.9835
P26201	0.000103282	-87.2324
E1B9W6	1.17e-05	-2763.8
Q9TUM6	0.000221512	-165.852
G5E537	1.37e-05	950.402
A4Z945	0.00079335	246.787
P18892	0.000117756	-84.5658
Q2KIU3	0.0127802	2.32559
Q0IIH5	0.000416707	-3.22104
Q5E956	0.000134874	537.662
P31976	0.000119564	198.074
E1B805	0.00167934	40.9589
A6QLB7	9.46e-05	97.9838
A4IFB6	0.00132329	68.2606
Q2KIT0	0.0083291	2.62276
Q1JPB0	5.34e-05	320.07
E1BAG3	0.00640694	80.3323
Q3T0D0	7.88e-05	66.0511
Q3ZBD7	0.000124969	72.3025
F1N1F8	0.000736514	3602.7
P55052	0.00013344	24.1587
P46193	0.000347298	111.803
P19035	0.0238946	34.8561
A6QLZ0	0.000545028	22.1294
F1MDH3	0.000162838	38.5978
F1MCF1	0.00194413	24.3895
Q6EWQ7	0.000173703	19.3547
Q3SYU2	0.000174951	22.4691
Q3SZJ4	0.00184703	27.4611
E1BMC6	0.000163507	199.191
P80177	0.000200769	19.7878
P08166	0.000204713	16.4535
Q0VCX1	0.00357197	20.241
E1BF59	0.000330208	269.653
F1MCC8	0.00248048	400.899
Q3SYW2	0.000102972	83.7778
F1MVJ8	0.00269641	20.5076
P68252	0.000274314	20.8593
E1BDM8	0.000415579	5.10698
F1MV51	0.00025139	-3281.79
A6QPQ2	0.000159046	283.365
E1BAU6	3.36e-05	-3.00618
P50448	0.000640795	-3.19432
P63103	0.0093533	31.2574
Q8MJ50	0.000335416	13.1115
E1B999	0.0012996	94.9098
F1N4V6	0.00135199	67.9067
Q28085	0.000490988	253.931
P38657	0.000563729	10.9585
P10103	0.000412652	182.981
Q3T052	0.000175943	37.7538
E1BCS3	0.00366252	27.266
G8JKW7	8.29e-05	3.96893
E1BNJ9	0.000870469	28.7204
G3N0V0	0.000356826	6.65623
Q3T035	0.000163916	200.848
F1MLU7	0.00708485	-39.1406
E1BGZ9	0.00278405	-336.752
Q8WML4	0.00023494	-102.121
E1BEQ4	0.00627211	38.5205
G3X894	0.000376147	204.173
A8YXY3	0.00137196	-122.625
F1MNS0	0.00256824	-58.3627
E1BN90	0.00434768	-221.102
Q2KIW1	0.00759302	71.4428
Q2HJ57	0.00122314	18.0046
F6PZ29	0.000293464	-798.669
Q9TTE1	0.00258038	2.10213
Q58CQ9	0.0019271	122.166
F1MNW4	0.00245792	52.0347
Q8SQ24	0.000723753	-3029.55
F1N4M7	0.00382994	14.4556
F1MCG9	0.00157503	98.6927
F1MNB5	0.0010492	-29.0589
F1MY85	0.00106538	128.505
Q95132	0.00352311	22.9592
C4T8B4	0.00251659	82.0469
P80025	0.000316726	-5.47301
Q3SX14	0.00571483	2.90077
Q58DR2	0.00418304	59.9051
Q3ZBS7	0.00754127	31.302
A2VDX0	0.00228461	27.3381
P54149	0.00159163	35.7774
F1MIR2	0.000750621	-118.772
F1MX87	0.00210959	53.2623
Q2KIF2	0.00429707	7.86561
Q8SPF8	0.00258415	10.1689
F1MDM0	0.00526387	150.868
P01035	0.000593075	-2.76034
F1N1D2	0.00463246	-76.9992
Q05718	0.00316971	17.5284
E1BMK9	0.00327392	11.6977
P19803	0.0227279	40.0373
Q3ZBZ1	0.0171259	-15.6622
P09487	0.00338382	8.46101
Q58DJ3	0.00214955	-823.665
P51122	0.00388679	11.5173
E1BLC6	0.00425546	-66.9255
E1BA36	0.00813862	53.2852
Q3ZC66	0.0194788	-474.557
Q5E9C0	0.00466057	6.76325
P62958	0.0051077	13.3177
Q9TT36	0.0217504	30.2611
Q58DD4	0.00299829	-29.8715
F1MP13	0.0123369	231.059
F1MMF2	0.00414495	-359.061
Q58D62	0.0198921	26.0907
P06868	0.00404543	71.0725
Q3ZEJ6	0.00480104	8.78847
Q29RY4	0.0172006	30.4128
P01030	0.01593	20.7369
P21752	0.0148924	90.845
Q2HJ81	0.0102946	5.87538
F1N084	0.0103011	-11.788
E1BBY7	0.0104126	3.31455
P33097	0.010577	3.77541
A8YXZ2	0.0205166	24.6935
Q3T0P6	0.0111798	260.602
E1BJH3	0.0251482	57.8271
G3N0K5	0.0155955	-40.916
F1MMS7	0.0111534	17.3123
A6QPP2	0.0203704	17.6051
E1BK12	0.0195274	-20.4125
P28782	0.00398483	30.9462
P62326	0.0180342	47.7952
Q10741	0.0119535	76.6671
Q865V6	0.0169933	9.38745
A5PJS6	0.0200649	-44.6897
F1N1T3	0.0216267	53.1246
