# Supplementary material for: Development of a bioinformatics platform for analysis of quantitative transcriptomics and proteomics data: the OMnalysis
Source: PeerJ. 2021 Nov 9;9:e12415. doi: 10.7717/peerj.12415 (PMC8588854; doi:10.7717/peerj.12415)
Supplement: Supplemental Information 7 [file peerj-09-12415-s007.xlsx]

## Sheet: Ensembl ID to Ensembl ID
ENSEMBLGENE	logFC	logCPM	Pvalue	logFC.1	logCPM.1	Pvalue.1	logFC.2	logCPM.2	Pvalue.2	logFC.3	logCPM.3	Pvalue.3	ensembl_gene_id.1
ENSG00000000003	-0.743751	4.55785	0.267133	-0.906162	4.55785	0.141092	0.417361	4.55785	0.581714	-0.359959	4.55785	0.640167	ENSG00000000003
ENSG00000000419	0.108453	4.75884	0.890174	0.0964688	4.75884	0.902259	-0.128665	4.75884	0.872534	-0.781387	4.75884	0.254466	ENSG00000000419
ENSG00000000460	-0.456511	1.78284	0.559013	-0.13903	1.78284	0.8607	-1.43246	1.78284	0.0431228	0.792963	1.78284	0.277646	ENSG00000000460
ENSG00000000971	-0.450115	6.9334	0.553369	-0.324618	6.9334	0.676356	0.131856	6.9334	0.868554	-0.620589	6.9334	0.380078	ENSG00000000971
ENSG00000001036	-0.0661253	5.46241	0.934619	-0.358448	5.46241	0.642259	-0.290225	5.46241	0.710371	0.171774	5.46241	0.827248	ENSG00000001036
ENSG00000001084	-0.186681	4.10063	0.813381	-0.623286	4.10063	0.381325	0.0577743	4.10063	0.941401	-0.0137889	4.10063	0.986338	ENSG00000001084
ENSG00000001167	0.414895	3.65317	0.584106	0.34253	3.65317	0.656407	-0.384145	3.65317	0.615672	0.178518	3.65317	0.820939	ENSG00000001167
ENSG00000001461	-0.731067	5.25994	0.275607	-1.37751	5.25994	0.00237672	-0.394921	5.25994	0.606211	-1.1324	5.25994	0.0298004	ENSG00000001461
ENSG00000001497	0.0188683	4.67499	0.980772	0.0137742	4.67499	0.985861	-0.412209	4.67499	0.589126	-0.546739	4.67499	0.454072	ENSG00000001497
ENSG00000001617	0.268128	6.48741	0.730415	0.326499	6.48741	0.672198	-0.514102	6.48741	0.487831	-0.450475	6.48741	0.551134	ENSG00000001617
ENSG00000001629	0.47273	7.12431	0.527393	1.20594	7.12431	0.00723276	0.115344	7.12431	0.884253	0.33004	7.12431	0.669373	ENSG00000001629
ENSG00000001631	0.137278	4.98918	0.861844	0.0313984	4.98918	0.968017	0.183696	4.98918	0.815144	0.919777	4.98918	0.120985	ENSG00000001631
ENSG00000002016	0.24312	2.61476	0.756031	0.319394	2.61476	0.680525	0.0753871	2.61476	0.923874	1.39141	2.61476	0.011583	ENSG00000002016
ENSG00000002079	1.23542	1.0549	0.284574	1.3909	1.0549	0.231737	0.225446	1.0549	0.857858	6.66316	1.0549	4.53e-13	ENSG00000002079
ENSG00000002330	-1.01726	3.74084	0.0872981	-1.57494	3.74084	0.00153653	-0.268101	3.74084	0.732414	-0.633672	3.74084	0.372784	ENSG00000002330
ENSG00000002549	1.77306	9.73006	7.36e-07	2.32665	9.73006	1.99e-11	0.484905	9.73006	0.514339	1.0559	9.73006	0.042822	ENSG00000002549
ENSG00000002586	0.0605873	6.96131	0.93857	0.412813	6.96131	0.58691	-0.280701	6.96131	0.719919	0.361927	6.96131	0.637558	ENSG00000002586
ENSG00000002822	-0.239738	4.26496	0.760658	-0.654732	4.26496	0.349988	-0.679737	4.26496	0.325607	-1.32524	4.26496	0.0106574	ENSG00000002822
ENSG00000002834	0.505483	4.45423	0.493526	0.481387	4.45423	0.517697	-0.315923	4.45423	0.684371	-0.340497	4.45423	0.659379	ENSG00000002834
ENSG00000002919	-0.0993832	4.37793	0.901111	-0.0668963	4.37793	0.933617	-0.461733	4.37793	0.538541	-0.412762	4.37793	0.587147	ENSG00000002919
ENSG00000003056	0.432039	4.84921	0.567076	0.405412	4.84921	0.593722	-0.614352	4.84921	0.38787	0.407662	4.84921	0.591602	ENSG00000003056
ENSG00000003147	-0.153846	3.23691	0.846033	-0.161232	3.23691	0.838437	0.501271	3.23691	0.50056	0.660453	3.23691	0.355903	ENSG00000003147
ENSG00000003249	-0.707587	3.89936	0.306213	-0.535285	3.89936	0.467433	0.0836505	3.89936	0.915065	-1.16417	3.89936	0.0469969	ENSG00000003249
ENSG00000003393	0.129639	4.64453	0.869542	0.172147	4.64453	0.826884	-0.0233766	4.64453	0.977359	0.289408	4.64453	0.709719	ENSG00000003393
ENSG00000003400	0.829333	4.91978	0.189246	1.2701	4.91978	0.00632599	0.362984	4.91978	0.636414	0.219845	4.91978	0.779404	ENSG00000003400
ENSG00000003402	1.11871	9.10057	0.0233558	2.14134	9.10057	4.95e-10	0.059727	9.10057	0.939299	2.41937	9.10057	3.08e-12	ENSG00000003402
ENSG00000003436	1.04716	8.50403	0.0421701	1.04405	8.50403	0.0434284	1.43912	8.50403	0.000112703	-0.142292	8.50403	0.859523	ENSG00000003436
ENSG00000003509	-0.20342	3.65607	0.796528	-0.815687	3.65607	0.219995	-0.0345636	3.65607	0.966138	0.455266	3.65607	0.544256	ENSG00000003509
ENSG00000003756	-0.0828501	6.66323	0.918575	0.046417	6.66323	0.95362	-0.782627	6.66323	0.22497	-0.571322	6.66323	0.428999	ENSG00000003756
ENSG00000003987	0.289969	2.04997	0.713883	0.832439	2.04997	0.242458	-0.00646422	2.04997	0.993331	1.60691	2.04997	0.0067567	ENSG00000003987
ENSG00000003989	1.62207	9.14237	0.000115971	2.33302	9.14237	1.74e-09	0.458282	9.14237	0.540723	0.378731	9.14237	0.620015	ENSG00000003989
ENSG00000004142	-0.00409954	5.19697	0.996674	-0.0248146	5.19697	0.975908	0.046809	5.19697	0.953525	0.332812	5.19697	0.66652	ENSG00000004142
ENSG00000004399	-0.341745	5.1065	0.658994	-0.73812	5.1065	0.269173	-0.0682645	5.1065	0.932529	-0.17117	5.1065	0.829241	ENSG00000004399
ENSG00000004455	0.00199222	7.12469	0.997021	0.0510113	7.12469	0.948072	0.0429571	7.12469	0.95611	-0.689213	7.12469	0.314156	ENSG00000004455
ENSG00000004468	4.07254	1.69862	0.00119209	8.62901	1.69862	4.88e-14	3.18281	1.69862	0.00996117	7.53598	1.69862	7.54e-11	ENSG00000004468
ENSG00000004478	0.191604	3.44112	0.807291	0.405036	3.44112	0.593898	0.0318387	3.44112	0.967419	-0.175182	3.44112	0.824161	ENSG00000004478
ENSG00000004487	0.168718	5.20588	0.830251	-0.108244	5.20588	0.892256	-0.0399292	5.20588	0.960824	-0.130041	5.20588	0.870318	ENSG00000004487
ENSG00000004534	0.107704	5.91295	0.892461	0.136949	5.91295	0.862892	0.0295035	5.91295	0.970332	0.369949	5.91295	0.631007	ENSG00000004534
ENSG00000004700	0.276032	5.20124	0.722798	0.207049	5.20124	0.791788	0.0861595	5.20124	0.912752	0.518541	5.20124	0.48099	ENSG00000004700
ENSG00000004766	0.0771421	4.63915	0.921802	0.0681056	4.63915	0.930928	-0.0163515	4.63915	0.984634	-0.134494	4.63915	0.86576	ENSG00000004766
ENSG00000004779	-0.265414	7.13549	0.735132	-0.361178	7.13549	0.641009	0.0302682	7.13549	0.969598	-0.431664	7.13549	0.571807	ENSG00000004779
ENSG00000004799	-1.57968	4.18073	0.00149903	-2.88219	4.18073	2.04e-08	-1.03759	4.18073	0.0782937	-1.67564	4.18073	0.00100572	ENSG00000004799
ENSG00000004864	-0.152788	5.21917	0.84768	0.021317	5.21917	0.978375	0.157445	5.21917	0.841865	-0.257623	5.21917	0.742716	ENSG00000004864
ENSG00000004866	-0.525433	4.44222	0.475139	-0.368803	4.44222	0.631288	-0.15154	4.44222	0.848961	0.481392	4.44222	0.517859	ENSG00000004866
ENSG00000004897	0.02675	7.40084	0.973299	0.13996	7.40084	0.861123	-0.030716	7.40084	0.970278	-0.0904221	7.40084	0.911614	ENSG00000004897
ENSG00000004961	-0.0105162	6.07127	0.990451	0.522551	6.07127	0.476592	-0.0122511	6.07127	0.98875	1.45958	6.07127	0.000433156	ENSG00000004961
ENSG00000004975	-0.262941	5.96625	0.737606	-0.577565	5.96625	0.422867	-0.0303861	5.96625	0.970505	-0.553022	5.96625	0.447382	ENSG00000004975
ENSG00000005007	0.079107	7.39111	0.920242	-0.103698	7.39111	0.897257	-0.147355	7.39111	0.853314	-0.660495	7.39111	0.340925	ENSG00000005007
ENSG00000005020	-0.448349	5.38095	0.554214	-1.08916	5.38095	0.0403074	0.186911	5.38095	0.811908	-0.000255166	5.38095	1.00043	ENSG00000005020
ENSG00000005022	0.00695796	8.08748	0.991689	-0.0930846	8.08748	0.908179	0.33578	8.08748	0.663013	0.199166	8.08748	0.799345	ENSG00000005022
ENSG00000005059	0.0556204	5.97362	0.944559	0.489092	5.97362	0.51099	-0.184989	5.97362	0.815434	-0.239678	5.97362	0.760698	ENSG00000005059
ENSG00000005075	-0.718313	5.46821	0.286312	-0.81029	5.46821	0.203921	-0.277336	5.46821	0.723296	0.0154115	5.46821	0.983899	ENSG00000005075
ENSG00000005100	-0.225565	5.39539	0.774909	-0.302584	5.39539	0.698057	-0.387454	5.39539	0.615382	-0.639599	5.39539	0.362215	ENSG00000005100
ENSG00000005156	0.0668015	4.41531	0.93224	0.366283	4.41531	0.63268	-0.451911	4.41531	0.548646	-0.209168	4.41531	0.790934	ENSG00000005156
ENSG00000005175	-0.0399774	6.72275	0.961157	0.0148521	6.72275	0.984922	-0.22371	6.72275	0.776668	0.15014	6.72275	0.849951	ENSG00000005175
ENSG00000005189	0.467333	2.37592	0.54373	0.734307	2.37592	0.31478	0.0794108	2.37592	0.921044	3.26712	2.37592	3.88e-10	ENSG00000005189
ENSG00000005194	-0.0536055	4.54858	0.947022	0.0142617	4.54858	0.985176	-0.100959	4.54858	0.899651	0.536645	4.54858	0.462766	ENSG00000005194
ENSG00000005206	-0.317633	4.38514	0.683391	-0.605611	4.38514	0.400445	-0.479892	4.38514	0.522051	-1.76367	4.38514	0.000568673	ENSG00000005206
ENSG00000005238	0.598876	3.62931	0.40728	1.16706	3.62931	0.0403394	0.61115	3.62931	0.394517	1.75253	3.62931	0.000208457	ENSG00000005238
ENSG00000005243	-0.545554	1.85131	0.473911	-0.497995	1.85131	0.517457	-0.0661404	1.85131	0.933702	1.05291	1.85131	0.110882	ENSG00000005243
ENSG00000005249	-0.182449	4.87755	0.81791	-0.289834	4.87755	0.710446	0.584237	4.87755	0.414995	-0.00247474	4.87755	0.998069	ENSG00000005249
ENSG00000005302	0.32733	6.15912	0.671879	0.658952	6.15912	0.340997	0.247185	6.15912	0.751621	0.391164	6.15912	0.615101	ENSG00000005302
ENSG00000005339	0.182518	7.16766	0.816313	0.187692	7.16766	0.811096	-0.519896	7.16766	0.480578	0.426494	7.16766	0.575084	ENSG00000005339
ENSG00000005436	-0.265409	4.19746	0.734786	-0.455298	4.19746	0.544843	0.257001	4.19746	0.741677	0.118734	4.19746	0.880668	ENSG00000005436
ENSG00000005448	-0.621124	5.15042	0.382058	-1.2458	5.15042	0.0144407	-0.12457	5.15042	0.876365	-1.02306	5.15042	0.0765297	ENSG00000005448
ENSG00000005469	-0.927821	4.03011	0.130536	-1.50084	4.03011	0.0018997	-0.293211	4.03011	0.707321	-1.29808	4.03011	0.0145755	ENSG00000005469
ENSG00000005483	0.471064	7.79744	0.533143	0.46796	7.79744	0.536617	0.0708736	7.79744	0.930115	1.23491	7.79744	0.00461815	ENSG00000005483
ENSG00000005486	-0.500696	3.78618	0.501139	-0.327278	3.78618	0.673029	-0.177789	3.78618	0.822812	-0.257165	3.78618	0.742874	ENSG00000005486
ENSG00000005700	0.220721	6.33969	0.778064	0.545767	6.33969	0.453021	-0.195335	6.33969	0.805063	-0.32128	6.33969	0.67946	ENSG00000005700
ENSG00000005801	0.118361	3.25939	0.8807	-0.145548	3.25939	0.85434	-0.0365268	3.25939	0.964287	-0.469145	3.25939	0.532291	ENSG00000005801
ENSG00000005810	0.653705	6.57039	0.346023	0.973769	6.57039	0.0784651	-0.18694	6.57039	0.813434	-0.0385288	6.57039	0.962191	ENSG00000005810
ENSG00000005812	-0.142914	4.85129	0.857505	-0.0923544	4.85129	0.90814	0.00503954	4.85129	0.994135	0.986675	4.85129	0.0824733	ENSG00000005812
ENSG00000005882	-0.765823	2.40856	0.27989	-0.655982	2.40856	0.368697	-0.141737	2.40856	0.858455	-0.243249	2.40856	0.755877	ENSG00000005882
ENSG00000005884	0.336283	6.29309	0.663012	0.395274	6.29309	0.60439	-0.631882	6.29309	0.369271	-0.589013	6.29309	0.411684	ENSG00000005884
ENSG00000005889	-0.0134575	6.04002	0.987347	1.82e-05	6.04002	0.999586	-0.304957	6.04002	0.695776	1.1218	6.04002	0.0222131	ENSG00000005889
ENSG00000005893	-0.103526	8.00201	0.899038	0.101392	8.00201	0.900227	0.123751	8.00201	0.878091	-0.398002	8.00201	0.60894	ENSG00000005893
ENSG00000006007	-0.59099	6.5049	0.411817	-1.0407	6.5049	0.0644087	-0.40209	6.5049	0.599486	-0.581734	6.5049	0.42102	ENSG00000006007
ENSG00000006015	-0.688252	4.27964	0.318046	-1.19311	4.27964	0.0244433	-0.455035	4.27964	0.545651	-0.666418	4.27964	0.339559	ENSG00000006015
ENSG00000006016	-0.987455	7.91156	0.104232	-0.799766	7.91156	0.229634	-0.722269	7.91156	0.294458	0.0867624	7.91156	0.911128	ENSG00000006016
ENSG00000006025	-0.273754	2.10878	0.726795	-0.95759	2.10878	0.167203	-0.741271	2.10878	0.298105	-0.606071	2.10878	0.418998	ENSG00000006025
ENSG00000006042	-0.767102	2.40169	0.278307	-1.26255	2.40169	0.0500426	-0.428558	2.40169	0.574367	-0.758598	2.40169	0.293051	ENSG00000006042
ENSG00000006062	0.453716	2.11466	0.555643	0.938488	2.11466	0.173337	-0.24528	2.11466	0.756377	-0.165287	2.11466	0.834707	ENSG00000006062
ENSG00000006118	1.15348	3.86916	0.0725735	1.79178	3.86916	0.00112725	0.891376	3.86916	0.19386	4.6084	3.86916	1.14e-16	ENSG00000006118
ENSG00000006125	0.00785256	8.06253	0.991703	0.103891	8.06253	0.896635	0.0641426	8.06253	0.936202	-0.100201	8.06253	0.901427	ENSG00000006125
ENSG00000006194	-0.577728	5.0157	0.427906	-0.567477	5.0157	0.437925	-0.294904	5.0157	0.706399	1.34706	5.0157	0.00741883	ENSG00000006194
ENSG00000006210	6.59133	3.79304	2.5e-15	8.91987	3.79304	4.47e-22	3.37955	3.79304	8.24e-05	4.81308	3.79304	1.77e-08	ENSG00000006210
ENSG00000006282	-0.0238142	3.00953	0.976825	-0.758271	3.00953	0.275466	0.29742	3.00953	0.700996	-0.539635	3.00953	0.467641	ENSG00000006282
ENSG00000006327	-0.204438	5.91559	0.797834	-0.146801	5.91559	0.855356	-1.1238	5.91559	0.0626191	0.0465125	5.91559	0.951471	ENSG00000006327
ENSG00000006451	1.37505	7.80729	0.000417226	1.67314	7.80729	1.93e-07	0.209672	7.80729	0.789023	-0.294007	7.80729	0.706748	ENSG00000006451
ENSG00000006453	-0.737229	3.22911	0.291845	-0.272605	3.22911	0.727778	0.228605	3.22911	0.769803	0.0118741	3.22911	0.987746	ENSG00000006453
ENSG00000006530	-0.169237	2.83715	0.830541	0.0254682	2.83715	0.974209	0.0337351	2.83715	0.965299	-1.03157	2.83715	0.123025	ENSG00000006530
ENSG00000006534	-1.16995	4.45166	0.0268024	-1.46162	4.45166	0.00204061	-0.563077	4.45166	0.438482	-0.898566	4.45166	0.147804	ENSG00000006534
ENSG00000006576	-0.617374	6.32507	0.383258	-0.883624	6.32507	0.140969	-0.41337	6.32507	0.5916	-0.855832	6.32507	0.163502	ENSG00000006576
ENSG00000006607	-0.305032	4.14462	0.695237	-0.640179	4.14462	0.364261	-0.220186	4.14462	0.780313	-0.780365	4.14462	0.241538	ENSG00000006607
ENSG00000006625	-0.415055	6.28154	0.586693	-0.81464	6.28154	0.197504	-0.111212	6.28154	0.88966	-0.163461	6.28154	0.837013	ENSG00000006625
ENSG00000006634	-0.00968677	6.34791	0.99115	-0.12038	6.34791	0.880607	-0.160763	6.34791	0.839733	0.506608	6.34791	0.492483	ENSG00000006634
ENSG00000006638	0.920365	2.36861	0.171983	0.704876	2.36861	0.328657	0.823481	2.36861	0.231259	-0.122281	2.36861	0.874752	ENSG00000006638
ENSG00000006652	0.170164	4.9359	0.828846	0.673951	4.9359	0.328077	0.21062	4.9359	0.788197	1.05489	4.9359	0.0513891	ENSG00000006652
ENSG00000006695	0.426444	3.55505	0.572426	0.541709	3.55505	0.459001	-0.112954	3.55505	0.887439	-1.10101	3.55505	0.0776448	ENSG00000006695
ENSG00000006704	-0.326864	3.90725	0.673035	-0.282388	3.90725	0.717434	0.48658	3.90725	0.512402	-0.795011	3.90725	0.236106	ENSG00000006704
ENSG00000006712	-0.153837	5.61203	0.846634	0.0247872	5.61203	0.974583	-0.427559	5.61203	0.573593	0.237029	5.61203	0.76194	ENSG00000006712
ENSG00000006715	-0.0957266	5.62056	0.905003	-0.14438	5.62056	0.856108	-0.355759	5.62056	0.645319	-0.510874	5.62056	0.489494	ENSG00000006715
ENSG00000006744	-0.11608	5.76256	0.88458	-0.324844	5.76256	0.675903	-0.239174	5.76256	0.761308	-0.870442	5.76256	0.15614	ENSG00000006744
ENSG00000006756	-0.0970709	3.34405	0.903034	-0.0653198	3.34405	0.934761	0.247398	3.34405	0.751187	0.179033	3.34405	0.820332	ENSG00000006756
ENSG00000006757	0.349868	2.78872	0.649186	0.279515	2.78872	0.719589	0.18022	2.78872	0.818294	0.414962	2.78872	0.586275	ENSG00000006757
ENSG00000006831	-0.29356	8.07718	0.707272	-0.452837	8.07718	0.549023	0.165346	8.07718	0.833638	-0.0504783	8.07718	0.950621	ENSG00000006831
ENSG00000007047	-0.37625	4.40881	0.624851	-0.276247	4.40881	0.724509	0.367831	4.40881	0.630916	-1.43959	4.40881	0.0093709	ENSG00000007047
ENSG00000007080	-0.355404	4.40991	0.645286	-0.620801	4.40991	0.38295	-0.948708	4.40991	0.113464	-0.581025	4.40991	0.421736	ENSG00000007080
ENSG00000007168	0.073892	7.00444	0.927266	0.124794	7.00444	0.877657	-0.0233229	7.00444	0.977583	0.00448322	7.00444	0.995283	ENSG00000007168
ENSG00000007202	-0.538702	6.12596	0.461689	-0.644359	6.12596	0.356844	-0.21677	6.12596	0.783665	-0.762696	6.12596	0.244483	ENSG00000007202
ENSG00000007255	-0.983193	5.25605	0.110998	-0.820094	5.25605	0.21695	-0.27589	5.25605	0.725734	0.286693	5.25605	0.711901	ENSG00000007255
ENSG00000007341	0.174342	3.58899	0.824717	0.263701	3.58899	0.735294	0.0442444	3.58899	0.955008	2.2968	3.58899	1.27e-08	ENSG00000007341
ENSG00000007376	-0.566359	3.75668	0.439899	-1.07995	3.75668	0.0787439	-0.310177	3.75668	0.69094	-1.39183	3.75668	0.0168066	ENSG00000007376
ENSG00000007384	0.483596	5.36641	0.515607	0.529932	5.36641	0.469039	0.10677	5.36641	0.892334	-1.4228	5.36641	0.00203185	ENSG00000007384
ENSG00000007392	-0.0653161	5.57287	0.935687	0.356461	5.57287	0.643787	-0.051572	5.57287	0.949436	-0.460487	5.57287	0.540584	ENSG00000007392
ENSG00000007541	-0.623951	2.68953	0.394287	-0.425121	2.68953	0.578306	0.313947	2.68953	0.684872	-0.558608	2.68953	0.456266	ENSG00000007541
ENSG00000007545	-0.00139731	4.51019	0.999322	0.364685	4.51019	0.634888	0.035341	4.51019	0.964124	0.308952	4.51019	0.690244	ENSG00000007545
ENSG00000007908	7.94617	4.20865	1.46e-17	8.89261	4.20865	2.19e-20	4.17517	4.20865	1.63e-05	9.58645	4.20865	3.7e-22	ENSG00000007908
ENSG00000007923	0.406846	2.93957	0.593939	0.615114	2.93957	0.396201	-0.722804	2.93957	0.308853	1.06481	2.93957	0.0857757	ENSG00000007923
ENSG00000007944	-1.58417	4.37319	0.00172601	-1.11901	4.37319	0.0538501	0.819684	4.37319	0.20269	1.58612	4.37319	0.000283924	ENSG00000007944
ENSG00000007952	0.0265135	2.95835	0.972551	-0.863271	2.95835	0.239198	0.040309	2.95835	0.958328	0.51425	2.95835	0.500192	ENSG00000007952
ENSG00000007968	-1.73887	4.10028	0.000142351	-1.69047	4.10028	0.00028382	0.150166	4.10028	0.848565	-0.170713	4.10028	0.829625	ENSG00000007968
ENSG00000008018	-0.046929	8.64686	0.956089	0.19037	8.64686	0.807023	-0.56766	8.64686	0.443142	-0.806308	8.64686	0.238339	ENSG00000008018
ENSG00000008083	-0.467556	4.74412	0.533905	-0.727996	4.74412	0.285831	-0.51542	4.74412	0.48647	-1.67559	4.74412	0.000655131	ENSG00000008083
ENSG00000008086	0.147805	1.63939	0.857702	1.22637	1.63939	0.0697825	-0.927867	1.63939	0.230965	-0.236275	1.63939	0.77127	ENSG00000008086
ENSG00000008130	0.164562	4.12591	0.834494	0.595703	4.12591	0.405256	0.0355691	4.12591	0.963973	0.692952	4.12591	0.313956	ENSG00000008130
ENSG00000008256	-0.786898	8.18689	0.2302	-1.2299	8.18689	0.014642	-0.801101	8.18689	0.218069	-1.52879	8.18689	0.000634353	ENSG00000008256
ENSG00000008282	0.254541	5.93622	0.744343	0.17643	5.93622	0.822486	0.344639	5.93622	0.654701	0.249865	5.93622	0.749132	ENSG00000008282
ENSG00000008283	-0.573363	2.6983	0.442839	-0.40347	2.6983	0.601009	-0.667034	2.6983	0.359492	0.102579	2.6983	0.897815	ENSG00000008283
ENSG00000008294	0.705342	8.46506	0.295869	1.08134	8.46506	0.0303681	-0.213662	8.46506	0.786794	0.558389	8.46506	0.440274	ENSG00000008294
ENSG00000008300	-0.674214	2.08661	0.373983	-0.578838	2.08661	0.452333	0.538323	2.08661	0.47168	2.71863	2.08661	3.33e-08	ENSG00000008300
ENSG00000008311	-0.0430507	3.57583	0.957292	0.145722	3.57583	0.853464	0.405283	3.57583	0.593742	0.0907104	3.57583	0.909154	ENSG00000008311
ENSG00000008324	-0.561031	4.60729	0.442845	-0.588552	4.60729	0.416661	-0.467122	4.60729	0.534634	0.518265	4.60729	0.482309	ENSG00000008324
ENSG00000008382	-0.540333	3.3693	0.462041	-0.981751	3.3693	0.116683	-0.133355	3.3693	0.867173	-0.149174	3.3693	0.850736	ENSG00000008382
ENSG00000008394	0.205013	3.97856	0.793843	0.113109	3.97856	0.886073	0.927908	3.97856	0.133974	0.113795	3.97856	0.885879	ENSG00000008394
ENSG00000008405	-0.459687	4.80854	0.540626	-0.536753	4.80854	0.463758	0.218638	4.80854	0.780146	0.459941	4.80854	0.539553	ENSG00000008405
ENSG00000008441	-0.108001	6.29222	0.892812	0.270926	6.29222	0.727961	-0.0893641	6.29222	0.911563	-0.873221	6.29222	0.15066	ENSG00000008441
ENSG00000008513	-0.111338	6.43355	0.889571	-0.43703	6.43355	0.564287	-0.646557	6.43355	0.355422	-2.44341	6.43355	7.49e-10	ENSG00000008513
ENSG00000008517	2.48742	5.80499	1.45e-10	3.05359	5.80499	3.6e-14	0.788804	5.80499	0.228268	-0.32809	5.80499	0.671171	ENSG00000008517
ENSG00000008710	-0.456279	2.02874	0.556504	-0.618502	2.02874	0.417772	-0.431892	2.02874	0.577342	-1.26461	2.02874	0.0875654	ENSG00000008710
ENSG00000008735	0.817328	1.60422	0.267025	-0.00364267	1.60422	0.992751	-1.09606	1.60422	0.155048	1.60118	1.60422	0.0121806	ENSG00000008735
ENSG00000008838	0.771226	8.45953	0.263303	1.07884	8.45953	0.0793838	0.188208	8.45953	0.809153	-1.10478	8.45953	0.0759119	ENSG00000008838
ENSG00000008853	0.787368	3.95738	0.229512	-0.287452	3.95738	0.712269	0.284965	3.95738	0.713723	0.0149311	3.95738	0.984772	ENSG00000008853
ENSG00000008869	-0.29792	3.7935	0.702048	-0.453176	3.7935	0.547013	-0.31654	3.7935	0.683588	0.257498	3.7935	0.741575	ENSG00000008869
ENSG00000008952	0.328078	8.59249	0.671155	0.374553	8.59249	0.627459	0.275926	8.59249	0.722875	-0.365667	8.59249	0.637057	ENSG00000008952
ENSG00000008988	-0.216855	10.3975	0.783785	-0.164799	10.3975	0.835952	-0.0296209	10.3975	0.971512	0.647941	10.3975	0.351774	ENSG00000008988
ENSG00000009307	0.273509	10.06	0.725278	0.458132	10.06	0.54212	0.106979	10.06	0.89244	0.45265	10.06	0.547686	ENSG00000009307
ENSG00000009335	-0.194355	6.22923	0.806069	-0.00524907	6.22923	0.995595	-0.22992	6.22923	0.770512	-0.835035	6.22923	0.181287	ENSG00000009335
ENSG00000009413	0.337902	6.73294	0.661121	-0.0492388	6.73294	0.951774	0.445121	6.73294	0.55412	0.715965	6.73294	0.288368	ENSG00000009413
ENSG00000009780	-0.0729695	4.75209	0.927589	-0.139222	4.75209	0.861146	-0.215253	4.75209	0.78517	0.62665	4.75209	0.3741	ENSG00000009780
ENSG00000009830	0.199007	5.57704	0.799453	0.155014	5.57704	0.843487	-0.077997	5.57704	0.923341	-1.03535	5.57704	0.0813471	ENSG00000009830
ENSG00000009844	-0.211705	5.94409	0.788727	-0.0627367	5.94409	0.938438	-0.328687	5.94409	0.672221	-0.168266	5.94409	0.832168	ENSG00000009844
ENSG00000009954	0.0132116	8.86927	0.986477	-0.163178	8.86927	0.837603	-0.0845142	8.86927	0.917328	0.446933	8.86927	0.556713	ENSG00000009954
ENSG00000010017	0.189185	4.35882	0.809541	0.120167	4.35882	0.878754	0.302545	4.35882	0.696036	0.586342	4.35882	0.418717	ENSG00000010017
ENSG00000010030	1.8938	4.9531	0.000147627	2.7766	4.9531	4.98e-09	-0.0317301	4.9531	0.968398	0.620261	4.9531	0.401732	ENSG00000010030
ENSG00000010072	-0.188978	4.26882	0.811267	-0.155601	4.26882	0.844636	0.210704	4.26882	0.78803	0.747735	4.26882	0.262797	ENSG00000010072
ENSG00000010165	0.00429641	4.94511	0.994969	0.0875373	4.94511	0.911627	0.0458213	4.94511	0.953318	0.0288377	4.94511	0.970537	ENSG00000010165
ENSG00000010219	0.0115874	3.20231	0.988103	0.00273945	3.20231	0.997149	-0.125666	3.20231	0.874472	0.712372	3.20231	0.304017	ENSG00000010219
ENSG00000010244	0.161254	7.08423	0.839359	0.361922	7.08423	0.640007	0.0585736	7.08423	0.942106	0.221874	7.08423	0.776898	ENSG00000010244
ENSG00000010256	-0.490855	5.12241	0.509584	-0.66453	5.12241	0.338309	0.0183494	5.12241	0.981183	-0.517324	5.12241	0.483072	ENSG00000010256
ENSG00000010270	0.313935	4.33241	0.685493	0.440413	4.33241	0.561511	0.269546	4.33241	0.729142	0.47576	4.33241	0.528433	ENSG00000010270
ENSG00000010278	0.230696	9.28008	0.775487	0.50477	9.28008	0.531609	0.889939	9.28008	0.251963	-1.14779	9.28008	0.139317	ENSG00000010278
ENSG00000010292	-0.0994082	7.01744	0.901598	-0.654274	7.01744	0.348662	0.0858887	7.01744	0.912974	0.0668905	7.01744	0.932031	ENSG00000010292
ENSG00000010295	-0.622812	5.77877	0.380207	-0.832953	5.77877	0.190816	-0.201253	5.77877	0.799708	-1.66174	5.77877	0.00016611	ENSG00000010295
ENSG00000010318	-0.525888	3.52099	0.475948	-0.683726	3.52099	0.330179	-0.0240865	3.52099	0.976608	1.11327	3.52099	0.0470885	ENSG00000010318
ENSG00000010322	-0.372271	4.42157	0.628315	-0.989741	4.42157	0.0910905	-0.147265	4.42157	0.8534	-1.39238	4.42157	0.00466266	ENSG00000010322
ENSG00000010404	0.0477766	4.71629	0.951384	-0.236256	4.71629	0.763978	0.197158	4.71629	0.801629	0.454903	4.71629	0.544411	ENSG00000010404
ENSG00000010539	0.0742867	3.8231	0.924967	-0.0148972	3.8231	0.985549	0.214879	3.8231	0.783832	0.522739	3.8231	0.477503	ENSG00000010539
ENSG00000010626	-0.00854865	4.10357	0.992605	-0.335131	4.10357	0.666017	-0.194007	4.10357	0.807014	0.0231079	4.10357	0.976113	ENSG00000010626
ENSG00000010704	-0.445652	2.51919	0.55797	0.246166	2.51919	0.753499	-0.0567234	2.51919	0.943678	-1.04563	2.51919	0.133793	ENSG00000010704
ENSG00000010803	-0.620178	4.54411	0.383107	-1.0296	4.54411	0.0741832	-0.122625	4.54411	0.878183	-0.52129	4.54411	0.480029	ENSG00000010803
ENSG00000010810	0.264389	5.88765	0.734519	0.44556	5.88765	0.555827	0.0603616	5.88765	0.939654	-0.0842386	5.88765	0.916646	ENSG00000010810
ENSG00000010818	1.33248	6.17129	0.00196968	2.22472	6.17129	5.11e-12	0.631477	6.17129	0.368243	4.04261	6.17129	6.38e-24	ENSG00000010818
ENSG00000011007	0.383279	5.98024	0.618071	0.524212	5.98024	0.474725	-0.288857	5.98024	0.711773	0.394844	5.98024	0.606618	ENSG00000011007
ENSG00000011009	0.0831441	6.7575	0.915368	0.0584398	6.7575	0.940107	0.422896	6.7575	0.57603	-0.919793	6.7575	0.133099	ENSG00000011009
ENSG00000011021	0.697032	3.46315	0.313825	0.784317	3.46315	0.239779	0.504659	3.46315	0.495196	-0.277312	3.46315	0.721477	ENSG00000011021
ENSG00000011028	-0.939897	5.15504	0.123844	-1.52466	5.15504	0.00170871	0.736314	5.15504	0.273088	0.379663	5.15504	0.619337	ENSG00000011028
ENSG00000011105	-0.455561	5.54184	0.545464	-0.0913743	5.54184	0.909498	0.0181547	5.54184	0.98076	-0.621899	5.54184	0.381048	ENSG00000011105
ENSG00000011114	-0.386362	6.73189	0.615327	-0.601932	6.73189	0.398468	-0.302923	6.73189	0.697926	-1.28877	6.73189	0.00321565	ENSG00000011114
ENSG00000011132	0.107576	2.88555	0.891759	0.278969	2.88555	0.720144	0.260557	2.88555	0.737826	-1.26235	2.88555	0.0537105	ENSG00000011132
ENSG00000011143	-0.182282	2.34637	0.81748	-1.13866	2.34637	0.084253	-0.675038	2.34637	0.347533	-0.563357	2.34637	0.451547	ENSG00000011143
ENSG00000011198	0.550545	4.16106	0.449389	0.573398	4.16106	0.427285	0.527109	4.16106	0.472066	1.29713	4.16106	0.00852768	ENSG00000011198
ENSG00000011243	0.0484374	4.65151	0.95053	0.307616	4.65151	0.691252	-0.584954	4.65151	0.419542	1.23438	4.65151	0.0182583	ENSG00000011243
ENSG00000011258	0.4239	3.4711	0.575272	0.774698	3.4711	0.249089	0.497772	3.4711	0.50177	1.5311	3.4711	0.00129384	ENSG00000011258
ENSG00000011260	0.277296	6.51129	0.721622	0.434479	6.51129	0.569144	-0.125992	6.51129	0.875489	0.354499	6.51129	0.646216	ENSG00000011260
ENSG00000011275	0.0759105	5.88835	0.924745	0.249004	5.88835	0.749864	-0.302577	5.88835	0.698161	-1.37759	5.88835	0.00180431	ENSG00000011275
ENSG00000011295	-0.0952236	7.30158	0.906171	-0.428972	7.30158	0.572776	-0.0917212	7.30158	0.909688	-0.586853	7.30158	0.416347	ENSG00000011295
ENSG00000011304	-0.263513	8.02182	0.73707	-0.35896	8.02182	0.642686	-0.205199	8.02182	0.795225	-0.971984	8.02182	0.0795892	ENSG00000011304
ENSG00000011376	0.359322	4.51423	0.640265	0.646058	4.51423	0.355613	-0.205931	4.51423	0.794398	-0.658864	4.51423	0.347327	ENSG00000011376
ENSG00000011405	-0.125064	9.05403	0.875879	-0.132932	9.05403	0.867965	-0.456202	9.05403	0.545343	-0.440652	9.05403	0.561013	ENSG00000011405
ENSG00000011422	1.69711	6.60941	0.000105971	2.15116	6.60941	1.65e-07	0.890277	6.60941	0.155353	2.17429	6.60941	1.35e-07	ENSG00000011422
ENSG00000011426	-0.00645712	7.90336	0.994608	-0.0822886	7.90336	0.918768	-0.287273	7.90336	0.713621	-0.0682947	7.90336	0.932762	ENSG00000011426
ENSG00000011451	0.0867859	4.97266	0.912571	0.00873433	4.97266	0.990662	0.0573784	4.97266	0.941993	-0.584286	4.97266	0.416832	ENSG00000011451
ENSG00000011454	-0.0428969	7.09128	0.958261	-0.127912	7.09128	0.874655	0.0294909	7.09128	0.970624	-0.758074	7.09128	0.247854	ENSG00000011454
ENSG00000011478	-0.395044	1.56221	0.643758	-1.83767	1.56221	0.0547522	0.860689	1.56221	0.264586	0.819632	1.56221	0.314176	ENSG00000011478
ENSG00000011485	-0.0973436	3.514	0.903045	-0.228857	3.514	0.771075	-0.0378356	3.514	0.963012	-0.382446	3.514	0.617903	ENSG00000011485
ENSG00000011523	-0.546549	3.83898	0.454975	-0.765105	3.83898	0.254302	-0.0966726	3.83898	0.90406	-1.35023	3.83898	0.0120532	ENSG00000011523
ENSG00000011566	0.327723	4.38415	0.671135	0.60553	4.38415	0.395951	-0.204229	4.38415	0.796041	0.321684	4.38415	0.677528	ENSG00000011566
ENSG00000011638	-0.769014	2.6593	0.274079	-0.000365795	2.6593	0.999601	-0.0554207	2.6593	0.94499	0.249532	2.6593	0.750319	ENSG00000011638
ENSG00000012048	-0.0136277	6.88975	0.987254	-0.0869687	6.88975	0.914791	-0.524459	6.88975	0.475962	0.229497	6.88975	0.769272	ENSG00000012048
ENSG00000012061	-0.338288	3.83124	0.661307	-0.33415	3.83124	0.665321	0.503062	3.83124	0.495972	1.26635	3.83124	0.0124041	ENSG00000012061
ENSG00000012171	-0.688168	1.65703	0.371219	-1.12081	1.65703	0.140468	0.490547	1.65703	0.520787	1.081	1.65703	0.112706	ENSG00000012171
ENSG00000012174	0.0604833	3.65063	0.938731	-0.268854	3.65063	0.730855	0.0827059	3.65063	0.916246	-1.19573	3.65063	0.0435219	ENSG00000012174
ENSG00000012232	0.380123	3.00023	0.618978	-0.156412	3.00023	0.842598	0.760924	3.00023	0.261347	-0.393651	3.00023	0.60667	ENSG00000012232
ENSG00000012660	0.436078	6.64351	0.57058	0.307485	6.64351	0.691629	0.429576	6.64351	0.577437	0.39479	6.64351	0.610494	ENSG00000012660
ENSG00000012779	0.607449	1.95528	0.462557	0.451987	1.95528	0.596006	1.87514	1.95528	0.00524262	1.29123	1.95528	0.0964489	ENSG00000012779
ENSG00000012822	0.212143	3.99477	0.786732	0.0270189	3.99477	0.97246	0.188534	3.99477	0.810278	-0.181143	3.99477	0.818486	ENSG00000012822
ENSG00000012963	-0.80853	5.37602	0.205568	-1.02239	5.37602	0.0644106	-0.30442	5.37602	0.696301	0.5787	5.37602	0.420422	ENSG00000012963
ENSG00000012983	0.0873641	6.43191	0.913803	0.0666562	6.43191	0.934171	-0.162888	6.43191	0.838233	0.710219	6.43191	0.29334	ENSG00000012983
ENSG00000013275	-0.0146987	6.18647	0.986361	0.00633224	6.18647	0.992613	-0.309532	6.18647	0.691497	-0.111658	6.18647	0.889184	ENSG00000013275
ENSG00000013288	0.0269709	5.36608	0.972338	0.155883	5.36608	0.843141	0.311058	5.36608	0.687954	-0.0125765	5.36608	0.988018	ENSG00000013288
ENSG00000013297	-0.0683265	7.45518	0.932755	-0.139464	7.45518	0.861399	-0.415837	7.45518	0.585754	-1.7352	7.45518	8.13e-06	ENSG00000013297
ENSG00000013306	-0.292398	5.64968	0.708533	-0.368107	5.64968	0.632957	-0.114305	5.64968	0.886651	-0.574549	5.64968	0.427398	ENSG00000013306
ENSG00000013364	0.487541	6.09584	0.511617	0.705043	6.09584	0.298672	0.205452	6.09584	0.793217	-0.785505	6.09584	0.229999	ENSG00000013364
ENSG00000013374	1.13621	8.95445	0.0172536	2.25838	8.95445	8.14e-15	-0.0674134	8.95445	0.934188	0.00315174	8.95445	0.996373	ENSG00000013374
ENSG00000013375	0.431164	5.70575	0.570341	0.586612	5.70575	0.41241	0.107504	5.70575	0.892483	-0.0807599	5.70575	0.920017	ENSG00000013375
ENSG00000013392	0.440668	2.84428	0.563245	0.589582	2.84428	0.424742	0.974097	2.84428	0.131276	0.308104	2.84428	0.695207	ENSG00000013392
ENSG00000013441	-0.248863	6.3728	0.751575	-0.252361	6.3728	0.748083	-0.252729	6.3728	0.747726	1.73503	6.3728	9.65e-08	ENSG00000013441
ENSG00000013503	-0.200366	3.9048	0.799869	-0.403144	3.9048	0.596835	-0.523109	3.9048	0.477763	-0.96023	3.9048	0.124267	ENSG00000013503
ENSG00000013561	-0.512654	5.98457	0.490259	-0.895621	5.98457	0.156221	-0.329259	5.98457	0.672423	-0.676179	5.98457	0.334616	ENSG00000013561
ENSG00000013573	-0.0195355	5.41324	0.981241	-0.299879	5.41324	0.700689	-0.0938574	5.41324	0.907037	0.00214358	5.41324	0.99736	ENSG00000013573
ENSG00000013583	-0.314303	5.8437	0.686468	-0.0858156	5.8437	0.915437	0.274013	5.8437	0.724866	-0.793525	5.8437	0.218228	ENSG00000013583
ENSG00000013588	-0.0671185	8.25047	0.933993	-0.369792	8.25047	0.631822	-0.965374	8.25047	0.0851756	-2.4075	8.25047	9.43e-11	ENSG00000013588
ENSG00000013810	-0.44129	6.59423	0.560452	-0.558458	6.59423	0.441829	-0.318547	6.59423	0.682417	-0.440797	6.59423	0.560797	ENSG00000013810
ENSG00000014123	0.269582	5.01276	0.729343	-0.152818	5.01276	0.847539	-0.00793894	5.01276	0.992865	0.511619	5.01276	0.487554	ENSG00000014123
ENSG00000014138	-0.0858531	4.49503	0.914713	0.0059965	4.49503	0.99346	0.0817455	4.49503	0.917543	-1.09769	4.49503	0.0532336	ENSG00000014138
ENSG00000014164	-0.317148	2.09294	0.684915	0.420628	2.09294	0.584792	0.232568	2.09294	0.766865	-2.04009	2.09294	0.00797852	ENSG00000014164
ENSG00000014216	-0.570839	5.25556	0.431097	-0.458575	5.25556	0.54254	-0.840472	5.25556	0.18527	-1.23412	5.25556	0.0172849	ENSG00000014216
ENSG00000014641	-0.185966	6.89077	0.814499	-0.497236	6.89077	0.503552	0.342506	6.89077	0.656823	-0.0857816	6.89077	0.915113	ENSG00000014641
ENSG00000014824	-0.218621	6.2487	0.781788	-0.204629	6.2487	0.795774	0.133886	6.2487	0.8666	-0.299115	6.2487	0.701564	ENSG00000014824
ENSG00000014914	1.01285	3.2787	0.101369	2.08302	3.2787	2.11e-06	0.589932	3.2787	0.414786	1.52941	3.2787	0.00275686	ENSG00000014914
ENSG00000014919	-0.0748401	5.0302	0.926082	-0.0450732	5.0302	0.955707	0.163045	5.0302	0.83621	0.0795128	5.0302	0.920508	ENSG00000014919
ENSG00000015133	-0.0656342	5.33683	0.935203	-0.390153	5.33683	0.61078	-0.536317	5.33683	0.464322	-1.4947	5.33683	0.000831934	ENSG00000015133
ENSG00000015153	0.00137388	5.17005	0.998139	-0.0507348	5.17005	0.949932	0.412605	5.17005	0.588244	0.056949	5.17005	0.94283	ENSG00000015153
ENSG00000015171	-0.151076	6.4736	0.850008	-0.229969	6.4736	0.770438	-0.443739	6.4736	0.560807	-0.247549	6.4736	0.752906	ENSG00000015171
ENSG00000015475	0.604452	5.12671	0.395093	1.11646	5.12671	0.0282956	0.148584	5.12671	0.850476	0.365	5.12671	0.634592	ENSG00000015475
ENSG00000015532	-0.594858	4.88528	0.408045	-1.00051	4.88528	0.087542	-0.22586	4.88528	0.775067	-1.62758	4.88528	0.000556504	ENSG00000015532
ENSG00000015676	-0.683815	6.18889	0.319922	-0.880918	6.18889	0.147765	-0.892493	6.18889	0.138322	-1.59748	6.18889	0.000123009	ENSG00000015676
ENSG00000016864	-0.715926	4.24312	0.300574	-0.965682	4.24312	0.122933	-0.277196	4.24312	0.723602	0.298708	4.24312	0.700267	ENSG00000016864
ENSG00000017260	0.0513959	5.05221	0.948278	0.151466	5.05221	0.847777	0.0251574	5.05221	0.974413	0.0406688	5.05221	0.959034	ENSG00000017260
ENSG00000017483	0.662108	5.85469	0.343531	1.84936	5.85469	8.88e-06	0.55384	5.85469	0.44682	0.0404239	5.85469	0.958756	ENSG00000017483
ENSG00000017797	-0.171859	7.5611	0.828887	-0.00412736	7.5611	0.996781	0.183138	7.5611	0.816292	-0.310269	7.5611	0.690656	ENSG00000017797
ENSG00000018189	0.311855	5.05923	0.687219	0.366124	5.05923	0.633635	0.0779771	5.05923	0.921517	-0.24913	5.05923	0.751023	ENSG00000018189
ENSG00000018408	-0.0306021	6.61611	0.970331	-0.0147544	6.61611	0.986092	0.250564	6.61611	0.74818	-0.173549	6.61611	0.826875	ENSG00000018408
ENSG00000018510	-0.126354	5.4614	0.874281	-0.103839	5.4614	0.896947	0.0541452	5.4614	0.945672	-0.833098	5.4614	0.187271	ENSG00000018510
ENSG00000018610	0.028833	3.76537	0.970668	-0.275392	3.76537	0.724493	-0.166539	3.76537	0.833859	-0.925094	3.76537	0.14762	ENSG00000018610
ENSG00000018699	0.577454	3.78088	0.424644	0.512279	3.78088	0.488304	-0.100107	3.78088	0.900296	-0.430065	3.78088	0.570559	ENSG00000018699
ENSG00000019144	0.327089	3.76557	0.671742	0.153596	3.76557	0.845427	-0.656643	3.76557	0.349599	-0.994103	3.76557	0.109759	ENSG00000019144
ENSG00000019485	-1.02313	3.91327	0.0978997	-0.873606	3.91327	0.183694	-0.279756	3.91327	0.720932	0.156502	3.91327	0.842576	ENSG00000019485
ENSG00000019582	2.97376	1.83444	0.000537975	4.67197	1.83444	8.01e-09	2.84838	1.83444	0.000696875	1.38854	1.83444	0.205879	ENSG00000019582
ENSG00000019995	-0.56818	4.65738	0.432845	-0.281536	4.65738	0.718768	-0.128348	4.65738	0.872215	0.339495	4.65738	0.659639	ENSG00000019995
ENSG00000020129	0.228368	4.05276	0.770369	0.207306	4.05276	0.791548	0.0300172	4.05276	0.968917	-0.744464	4.05276	0.280953	ENSG00000020129
ENSG00000020256	-0.735291	3.01014	0.289919	-0.640902	3.01014	0.37203	0.00254371	3.01014	0.996503	-1.86836	3.01014	0.00137669	ENSG00000020256
ENSG00000020426	0.272228	5.53721	0.72673	0.353033	5.53721	0.646267	0.299561	5.53721	0.699425	0.538715	5.53721	0.460402	ENSG00000020426
ENSG00000020577	0.578104	5.53297	0.420922	0.797019	5.53297	0.213251	-0.392162	5.53297	0.610543	0.626152	5.53297	0.3738	ENSG00000020577
ENSG00000020633	0.894411	3.73241	0.16652	2.5992	3.73241	1.99e-09	0.801532	3.73241	0.230213	1.65557	3.73241	0.00080515	ENSG00000020633
ENSG00000020922	-0.275227	6.64927	0.725383	-0.687337	6.64927	0.314987	-0.225808	6.64927	0.774584	-0.995128	6.64927	0.0698689	ENSG00000020922
ENSG00000021355	0.169077	5.63599	0.829909	0.683715	5.63599	0.317488	0.255862	5.63599	0.743006	-0.370173	5.63599	0.630458	ENSG00000021355
ENSG00000021574	-0.523422	4.57859	0.477117	-0.577755	4.57859	0.423506	-0.270122	4.57859	0.730396	-0.446475	4.57859	0.553647	ENSG00000021574
ENSG00000021762	-0.535012	4.99296	0.465875	0.0433581	4.99296	0.95571	0.00265146	4.99296	0.996386	-1.23687	4.99296	0.0158416	ENSG00000021762
ENSG00000021776	-0.0193432	5.76219	0.98145	-0.138295	5.76219	0.862278	0.0492666	5.76219	0.950651	-0.269617	5.76219	0.730845	ENSG00000021776
ENSG00000022267	-0.664882	6.0508	0.336828	-0.938274	6.0508	0.104098	0.0433171	6.0508	0.95625	-0.225618	6.0508	0.77482	ENSG00000022267
ENSG00000022277	-0.16852	6.70088	0.831953	-0.0812552	6.70088	0.919779	-0.344303	6.70088	0.656934	-0.242903	6.70088	0.757534	ENSG00000022277
ENSG00000022840	-0.0195953	7.41263	0.981586	0.0301144	7.41263	0.96871	0.184155	7.41263	0.814443	0.109698	7.41263	0.889077	ENSG00000022840
ENSG00000023041	0.226713	6.14333	0.772117	0.460335	6.14333	0.54079	0.288607	6.14333	0.710351	0.707283	6.14333	0.294655	ENSG00000023041
ENSG00000023171	0.560862	4.99159	0.438277	-0.112317	4.99159	0.88804	1.11098	4.99159	0.0293494	-0.287697	4.99159	0.712317	ENSG00000023171
ENSG00000023191	0.0160776	6.12443	0.98363	-0.12085	6.12443	0.880229	0.117032	6.12443	0.883236	-0.276311	6.12443	0.724221	ENSG00000023191
ENSG00000023228	-0.320169	6.45256	0.680743	-0.411023	6.45256	0.593937	-0.0467655	6.45256	0.954517	-0.948612	6.45256	0.0975727	ENSG00000023228
ENSG00000023287	0.232939	7.51444	0.765762	0.172115	7.51444	0.826723	0.571231	7.51444	0.427316	0.672003	7.51444	0.328243	ENSG00000023287
ENSG00000023318	0.275609	6.11296	0.723333	0.591512	6.11296	0.407481	-0.174757	6.11296	0.82571	0.629695	6.11296	0.370058	ENSG00000023318
ENSG00000023330	0.531447	4.26399	0.473523	0.623652	4.26399	0.38832	0.279457	4.26399	0.719392	0.176085	4.26399	0.823699	ENSG00000023330
ENSG00000023445	2.36516	7.60147	1.28e-13	3.4812	7.60147	2.19e-21	1.28542	7.60147	0.00280756	3.51566	7.60147	1.59e-21	ENSG00000023445
ENSG00000023516	0.0974869	5.56862	0.901807	0.0966729	5.56862	0.902632	0.0104908	5.56862	0.988779	-0.803051	5.56862	0.212097	ENSG00000023516
ENSG00000023572	-0.18916	5.02325	0.811351	-0.191465	5.02325	0.809006	-0.276321	5.02325	0.724297	0.290179	5.02325	0.708836	ENSG00000023572
ENSG00000023608	-0.0652009	8.86113	0.936541	-0.218806	8.86113	0.781692	0.0220099	8.86113	0.977945	-0.301812	8.86113	0.699151	ENSG00000023608
ENSG00000023697	-0.306659	4.51438	0.694274	-0.513322	4.51438	0.490349	0.299749	4.51438	0.698784	0.622742	4.51438	0.383508	ENSG00000023697
ENSG00000023734	-0.35368	6.84183	0.648049	-0.274111	6.84183	0.726482	-0.179112	6.84183	0.82133	-0.0178997	6.84183	0.982951	ENSG00000023734
ENSG00000023839	0.852029	1.04863	0.343387	0.060009	1.04863	0.96078	0.178593	1.04863	0.851202	4.75714	1.04863	2.8e-11	ENSG00000023839
ENSG00000023902	0.0493682	7.08775	0.949658	0.432406	7.08775	0.5671	-0.00371769	7.08775	0.997307	-0.150503	7.08775	0.850219	ENSG00000023902
ENSG00000023909	-0.567206	7.52296	0.43371	-0.103118	7.52296	0.897895	-0.27798	7.52296	0.722913	-1.94617	7.52296	3.89e-07	ENSG00000023909
ENSG00000024048	0.0552358	6.0962	0.945229	0.30687	6.0962	0.692233	-0.43813	6.0962	0.566287	-0.49772	6.0962	0.502714	ENSG00000024048
ENSG00000024422	0.0782038	6.36241	0.92065	-0.144107	6.36241	0.856778	-0.582766	6.36241	0.418692	-1.79103	6.36241	1.58e-05	ENSG00000024422
ENSG00000024526	-0.566092	5.87488	0.434306	-0.687524	5.87488	0.315165	-0.102247	5.87488	0.899201	-0.0658819	5.87488	0.935311	ENSG00000024526
ENSG00000024862	-0.185521	5.55742	0.814896	-0.104643	5.55742	0.895961	-0.236295	5.55742	0.764163	0.497952	5.55742	0.501269	ENSG00000024862
ENSG00000025156	-0.429951	6.03342	0.571591	-0.57611	6.03342	0.427256	0.00874988	6.03342	0.989865	1.12642	6.03342	0.0353627	ENSG00000025156
ENSG00000025293	-0.194515	6.15105	0.805919	-0.423444	6.15105	0.579011	-0.14922	6.15105	0.851373	-0.505198	6.15105	0.495337	ENSG00000025293
ENSG00000025434	-0.54907	2.10285	0.465579	-0.514432	2.10285	0.497916	0.393129	2.10285	0.607118	-0.0513436	2.10285	0.946788	ENSG00000025434
ENSG00000025708	1.72487	7.32508	5.2e-06	2.59458	7.32508	1.17e-12	0.42847	7.32508	0.570757	1.53554	7.32508	0.000143966	ENSG00000025708
ENSG00000025770	-0.753624	5.84339	0.271624	-1.02536	5.84339	0.0941631	-1.03054	5.84339	0.0897513	-0.901544	5.84339	0.164042	ENSG00000025770
ENSG00000025772	-0.16093	5.7858	0.839559	0.00761482	5.7858	0.991704	-0.0592235	5.7858	0.941679	0.553413	5.7858	0.445511	ENSG00000025772
ENSG00000025796	0.161327	7.32476	0.839492	0.186342	7.32476	0.813079	0.231235	7.32476	0.767438	-0.0319588	7.32476	0.969001	ENSG00000025796
ENSG00000025800	-0.0270986	7.71148	0.973902	-0.174841	7.71148	0.825655	-0.114961	7.71148	0.886551	-1.14195	7.71148	0.0176344	ENSG00000025800
ENSG00000026025	0.427377	9.4355	0.573716	0.61511	9.4355	0.383758	-0.148508	9.4355	0.85221	0.176131	9.4355	0.822736	ENSG00000026025
ENSG00000026103	0.882156	3.37995	0.183634	1.32424	3.37995	0.0187915	0.632681	3.37995	0.378721	3.14689	3.37995	1.4e-11	ENSG00000026103
ENSG00000026297	0.273485	2.52965	0.725355	-0.197028	2.52965	0.802097	-0.0170224	2.52965	0.98368	-0.737994	2.52965	0.308617	ENSG00000026297
ENSG00000026508	2.2852	7.68975	1.17e-14	2.70194	7.68975	3.25e-18	0.168585	7.68975	0.830787	0.821229	7.68975	0.189819	ENSG00000026508
ENSG00000026652	-0.180446	3.03454	0.819576	-0.607904	3.03454	0.401931	-0.0309024	3.03454	0.969954	-1.91161	3.03454	0.00115312	ENSG00000026652
ENSG00000026950	0.997922	5.10096	0.0752906	1.42681	5.10096	0.000639832	0.0528092	5.10096	0.946893	1.25834	5.10096	0.00749966	ENSG00000026950
ENSG00000027001	-0.0415194	3.32224	0.958839	-0.273956	3.32224	0.725496	0.102309	3.32224	0.896545	-0.0366092	3.32224	0.963104	ENSG00000027001
ENSG00000027075	0.129945	5.91845	0.869995	0.253861	5.91845	0.745047	0.469455	5.91845	0.531577	0.180548	5.91845	0.818431	ENSG00000027075
ENSG00000027697	0.0256347	4.89657	0.972956	0.31376	4.89657	0.68564	0.613676	4.89657	0.395263	0.605009	4.89657	0.405907	ENSG00000027697
ENSG00000027847	-0.0146035	5.18402	0.986142	-0.0870275	5.18402	0.913535	-0.107429	5.18402	0.893172	-0.812402	5.18402	0.206719	ENSG00000027847
ENSG00000027869	0.84592	1.77416	0.236399	0.285558	1.77416	0.720158	-0.522732	1.77416	0.500286	-1.62098	1.77416	0.0446144	ENSG00000027869
ENSG00000028116	0.213441	5.38584	0.785358	0.7512	5.38584	0.257296	-0.130678	5.38584	0.870018	0.147403	5.38584	0.851644	ENSG00000028116
ENSG00000028137	0.796826	7.02187	0.219411	1.42497	7.02187	0.00140122	0.061138	7.02187	0.937426	-2.32901	7.02187	1.14e-07	ENSG00000028137
ENSG00000028203	0.266687	6.17849	0.73221	0.556885	6.17849	0.441908	-0.336116	6.17849	0.664779	-0.475612	6.17849	0.526163	ENSG00000028203
ENSG00000028277	4.39076	5.24799	8.84e-23	5.03052	5.24799	2.59e-25	0.945072	5.24799	0.11997	1.21219	5.24799	0.0260091	ENSG00000028277
ENSG00000028310	-0.143137	6.35834	0.857568	-0.0274997	6.35834	0.973459	-0.68762	6.35834	0.315321	-1.54627	6.35834	0.000155972	ENSG00000028310
ENSG00000028528	0.0693376	7.06526	0.929089	-0.157447	7.06526	0.843937	0.0260016	7.06526	0.972443	-0.678196	7.06526	0.329808	ENSG00000028528
ENSG00000028839	-0.179317	3.00372	0.82016	0.0999215	3.00372	0.89944	-0.234701	3.00372	0.765055	1.11595	3.00372	0.0559536	ENSG00000028839
ENSG00000029153	0.2651	4.62655	0.733815	0.998537	4.62655	0.0795428	0.472264	4.62655	0.526794	0.624581	4.62655	0.377153	ENSG00000029153
ENSG00000029363	0.185423	7.76645	0.813919	-0.0362211	7.76645	0.964873	0.0176567	7.76645	0.982228	0.636717	7.76645	0.362408	ENSG00000029363
ENSG00000029364	-0.147833	5.307	0.852662	-0.447916	5.307	0.553604	0.117972	5.307	0.88196	0.254238	5.307	0.744769	ENSG00000029364
ENSG00000029639	0.339327	3.23659	0.659431	0.724733	3.23659	0.291868	0.362506	3.23659	0.635899	-0.0603319	3.23659	0.938753	ENSG00000029639
ENSG00000029725	0.182384	6.76924	0.816486	-0.0402491	6.76924	0.960797	0.0173529	6.76924	0.982257	-0.075568	6.76924	0.925631	ENSG00000029725
ENSG00000029993	-0.48574	5.20426	0.51479	-0.881856	5.20426	0.148753	-0.515202	5.20426	0.485279	-0.0150945	5.20426	0.985631	ENSG00000029993
ENSG00000030066	0.0494406	4.44469	0.949674	0.146395	4.44469	0.852572	-0.0362343	4.44469	0.964573	-0.591434	4.44469	0.412093	ENSG00000030066
ENSG00000030110	0.072351	4.26547	0.926274	0.440726	4.26547	0.559422	-0.556056	4.26547	0.450117	-0.733559	4.26547	0.296412	ENSG00000030110
ENSG00000030419	-0.384945	3.51516	0.615252	0.930125	3.51516	0.13611	0.309071	3.51516	0.689441	-0.932157	3.51516	0.162806	ENSG00000030419
ENSG00000030582	-0.0805094	7.87975	0.921113	-0.0339832	7.87975	0.967665	-0.384289	7.87975	0.617656	-0.448159	7.87975	0.553993	ENSG00000030582
ENSG00000031003	-0.222886	4.02158	0.777433	-0.319482	4.02158	0.680718	-0.260323	4.02158	0.740154	0.226597	4.02158	0.772483	ENSG00000031003
ENSG00000031081	0.284542	5.48128	0.714006	0.486317	5.48128	0.513669	0.286912	5.48128	0.711573	-0.521321	5.48128	0.482505	ENSG00000031081
ENSG00000031691	-0.360955	6.25896	0.640096	-0.106446	6.25896	0.894357	0.631069	6.25896	0.368945	0.494076	6.25896	0.505147	ENSG00000031691
ENSG00000031698	0.192399	7.1848	0.806361	0.181981	7.1848	0.816825	-0.17419	7.1848	0.826272	-0.52653	7.1848	0.473907	ENSG00000031698
ENSG00000031823	-0.0414562	4.0531	0.959138	0.0478692	4.0531	0.951496	-0.120465	4.0531	0.880069	-0.967643	4.0531	0.118213	ENSG00000031823
ENSG00000032219	-0.23039	6.89054	0.769999	-0.50426	6.89054	0.496348	0.0384548	6.89054	0.960924	-0.494036	6.89054	0.506643	ENSG00000032219
ENSG00000032389	-0.477827	3.80542	0.52261	-0.0617291	3.80542	0.938733	-0.146758	3.80542	0.853701	-1.10696	3.80542	0.0623841	ENSG00000032389
ENSG00000032444	-0.479476	2.93073	0.522433	-1.16125	2.93073	0.0608559	-0.0489446	2.93073	0.951699	-0.725665	2.93073	0.305247	ENSG00000032444
ENSG00000032742	-0.115059	3.94294	0.885135	-0.000304935	3.94294	1.00016	-0.0599937	3.94294	0.94061	0.456356	3.94294	0.543085	ENSG00000032742
ENSG00000033011	-0.348646	2.20168	0.652088	-0.370196	2.20168	0.631155	-0.173316	2.20168	0.826644	-1.36865	2.20168	0.0419274	ENSG00000033011
ENSG00000033030	0.104749	5.49713	0.894993	0.0733443	5.49713	0.926466	0.0693428	5.49713	0.930477	1.3391	5.49713	0.00160059	ENSG00000033030
ENSG00000033050	0.205772	5.15292	0.793114	0.125505	5.15292	0.873655	0.0582248	5.15292	0.941048	-0.65303	5.15292	0.349983	ENSG00000033050
ENSG00000033100	-0.214185	2.46704	0.784809	0.364468	2.46704	0.635988	0.278951	2.46704	0.719381	-0.0688104	2.46704	0.929405	ENSG00000033100
ENSG00000033170	0.651071	4.82552	0.350088	0.713401	4.82552	0.291233	0.54307	4.82552	0.455906	-0.00784635	4.82552	0.99249	ENSG00000033170
ENSG00000033178	0.603872	6.78843	0.3949	1.09341	6.78843	0.0275689	-0.104356	6.78843	0.898053	0.219905	6.78843	0.778958	ENSG00000033178
ENSG00000033327	-0.679163	4.66795	0.328466	-0.767332	4.66795	0.250563	0.0329548	4.66795	0.96586	-1.83743	4.66795	0.000121477	ENSG00000033327
ENSG00000033627	0.0371167	5.42135	0.962314	-0.198276	5.42135	0.802109	-0.52367	5.42135	0.476685	0.340331	5.42135	0.65916	ENSG00000033627
ENSG00000033800	0.0429169	5.6757	0.957046	-0.134897	5.6757	0.865799	0.0507402	5.6757	0.9493	-0.661572	5.6757	0.340755	ENSG00000033800
ENSG00000033867	0.57039	5.78814	0.428487	0.688463	5.78814	0.312766	0.0981356	5.78814	0.901618	-0.534005	5.78814	0.466289	ENSG00000033867
ENSG00000034053	-0.669653	2.07858	0.356711	-1.38861	2.07858	0.0308739	-0.383288	2.07858	0.618081	-1.2135	2.07858	0.074096	ENSG00000034053
ENSG00000034152	0.942374	5.94987	0.13997	1.28314	5.94987	0.0212013	-0.572076	5.94987	0.438294	0.950945	5.94987	0.136965	ENSG00000034152
ENSG00000034510	0.0914793	8.6092	0.908672	0.711225	8.6092	0.2904	-0.667816	8.6092	0.333813	-0.416074	8.6092	0.587298	ENSG00000034510
ENSG00000034533	0.200857	2.18318	0.799593	0.0950001	2.18318	0.906278	0.521578	2.18318	0.484685	1.05561	2.18318	0.107571	ENSG00000034533
ENSG00000034677	-0.197714	5.74351	0.802662	0.437731	5.74351	0.562382	-0.0972602	5.74351	0.903468	1.00697	5.74351	0.0647936	ENSG00000034677
ENSG00000034693	-0.16571	3.52836	0.834291	-0.0556271	3.52836	0.944559	0.172512	3.52836	0.82606	0.36622	3.52836	0.633552	ENSG00000034693
ENSG00000034713	0.11832	6.87119	0.880613	0.385928	6.87119	0.61349	0.501146	6.87119	0.497951	1.17232	6.87119	0.0145475	ENSG00000034713
ENSG00000035115	-0.41929	2.60736	0.582108	-0.595022	2.60736	0.418914	0.0859056	2.60736	0.913189	0.39046	2.60736	0.610608	ENSG00000035115
ENSG00000035141	-0.461412	5.0207	0.539247	-0.560295	5.0207	0.440339	-0.282214	5.0207	0.7184	-0.555665	5.0207	0.445005	ENSG00000035141
ENSG00000035403	-0.179355	7.23658	0.821093	-0.050899	7.23658	0.950344	-0.318582	7.23658	0.682421	-0.301198	7.23658	0.699609	ENSG00000035403
ENSG00000035499	-0.778371	3.4564	0.246157	-1.19343	3.4564	0.036282	-0.716032	3.4564	0.296981	0.0271631	3.4564	0.972239	ENSG00000035499
ENSG00000035664	-0.937582	1.71562	0.206759	-1.50431	1.71562	0.0421945	0.292811	1.71562	0.708725	-0.774688	1.71562	0.319882	ENSG00000035664
ENSG00000035681	0.597819	4.71865	0.402035	0.315878	4.71865	0.683156	-0.178627	4.71865	0.8217	0.345714	4.71865	0.653495	ENSG00000035681
ENSG00000035687	0.567407	6.57862	0.431262	0.816021	6.57862	0.194014	0.139057	6.57862	0.860925	-0.815986	6.57862	0.197423	ENSG00000035687
ENSG00000035862	-0.331688	9.31944	0.669598	-0.707839	9.31944	0.29532	-0.118708	9.31944	0.88227	0.00621524	9.31944	0.992878	ENSG00000035862
ENSG00000035928	-0.00482279	7.8037	0.996104	-0.349499	7.8037	0.652152	0.249743	7.8037	0.748937	-0.226827	7.8037	0.773601	ENSG00000035928
ENSG00000036054	0.154427	5.20361	0.844608	0.321752	5.20361	0.677425	-0.154919	5.20361	0.84552	0.572996	5.20361	0.426374	ENSG00000036054
ENSG00000036257	0.5013	5.25994	0.497786	0.285357	5.25994	0.713661	0.33212	5.25994	0.66694	0.27405	5.25994	0.72506	ENSG00000036257
ENSG00000036448	0.775611	1.75939	0.325351	0.262593	1.75939	0.761666	-0.761974	1.75939	0.364592	4.71267	1.75939	9.86e-14	ENSG00000036448
ENSG00000036549	0.100885	6.00435	0.900434	0.242622	6.00435	0.756242	-0.316666	6.00435	0.68412	0.510591	6.00435	0.488475	ENSG00000036549
ENSG00000037042	-0.178526	3.4446	0.821338	0.157312	3.4446	0.84179	1.01658	3.4446	0.0820305	0.029297	3.4446	0.970568	ENSG00000037042
ENSG00000037241	0.159918	5.62999	0.839052	0.247285	5.62999	0.751648	0.178048	5.62999	0.82081	1.60952	5.62999	1.34e-05	ENSG00000037241
ENSG00000037474	0.168026	5.69252	0.830822	0.370554	5.69252	0.628764	-0.577633	5.69252	0.423116	0.240206	5.69252	0.75866	ENSG00000037474
ENSG00000037637	-0.349682	3.65174	0.650384	-0.625377	3.65174	0.380232	-0.210997	3.65174	0.789443	-1.65495	3.65174	0.00136294	ENSG00000037637
ENSG00000037749	0.358466	3.3657	0.640295	0.00312198	3.3657	0.996787	0.15899	3.3657	0.839861	0.30618	3.3657	0.693283	ENSG00000037749
ENSG00000037897	0.749999	4.97546	0.270616	0.848119	4.97546	0.193816	-0.523774	4.97546	0.48105	-2.3219	4.97546	3.05e-05	ENSG00000037897
ENSG00000038002	-0.0263567	4.25675	0.97428	-0.532613	4.25675	0.468255	-0.174958	4.25675	0.825428	0.694381	4.25675	0.311311	ENSG00000038002
ENSG00000038210	0.452416	3.82963	0.547477	0.860334	3.82963	0.182602	0.0430355	3.82963	0.956206	0.582178	3.82963	0.423296	ENSG00000038210
ENSG00000038219	0.299831	7.87521	0.699168	0.208577	7.87521	0.790122	0.108475	7.87521	0.891075	-0.578701	7.87521	0.421637	ENSG00000038219
ENSG00000038274	-0.0241045	5.73161	0.976748	0.00946853	5.73161	0.989675	0.473708	5.73161	0.525432	0.634031	5.73161	0.366765	ENSG00000038274
ENSG00000038358	0.594869	1.54044	0.443904	-0.0046097	1.54044	0.991566	-0.0100267	1.54044	0.988204	0.194391	1.54044	0.819079	ENSG00000038358
ENSG00000038382	0.567115	6.7645	0.431518	0.595259	6.7645	0.403443	-0.429289	6.7645	0.572934	-0.665173	6.7645	0.336524	ENSG00000038382
ENSG00000038532	-0.290474	3.83134	0.709666	-0.480071	3.83134	0.520436	-0.322616	3.83134	0.677679	-0.952463	3.83134	0.127853	ENSG00000038532
ENSG00000039123	0.101323	7.31963	0.898162	-0.0955142	7.31963	0.905521	-0.511337	7.31963	0.489264	-1.33427	7.31963	0.00148951	ENSG00000039123
ENSG00000039139	1.28994	2.31944	0.0378333	1.20886	2.31944	0.0592759	0.792077	2.31944	0.262548	-0.973408	2.31944	0.222386	ENSG00000039139
ENSG00000039319	-0.0728325	5.97729	0.928078	-0.104028	5.97729	0.896745	-0.0277152	5.97729	0.973125	-0.297136	5.97729	0.703419	ENSG00000039319
ENSG00000039523	0.736555	5.99389	0.266967	0.727064	5.99389	0.275959	0.262384	5.99389	0.736484	-0.0308678	5.99389	0.969811	ENSG00000039523
ENSG00000039560	0.303408	8.13423	0.695615	0.495658	8.13423	0.504976	0.146123	8.13423	0.856015	0.00400725	8.13423	0.995709	ENSG00000039560
ENSG00000039650	0.117226	4.97859	0.881478	0.286472	4.97859	0.712256	-0.102568	4.97859	0.898455	-1.30262	4.97859	0.0135361	ENSG00000039650
ENSG00000040199	0.210432	3.3401	0.788471	0.192426	3.3401	0.806666	-0.287684	3.3401	0.711866	0.805028	3.3401	0.226101	ENSG00000040199
ENSG00000040275	-0.624054	7.83836	0.376584	-0.717138	7.83836	0.286121	-0.673843	7.83836	0.327844	-0.431371	7.83836	0.570671	ENSG00000040275
ENSG00000040341	-0.693967	4.84673	0.310582	-0.804578	4.84673	0.211987	0.0783339	4.84673	0.921205	-0.975766	4.84673	0.095218	ENSG00000040341
ENSG00000040487	0.0571006	4.39901	0.942274	-0.0242621	4.39901	0.976349	0.311359	4.39901	0.687587	-1.29035	4.39901	0.0155372	ENSG00000040487
ENSG00000040531	0.2145	4.39134	0.784142	-0.118089	4.39134	0.882619	0.118676	4.39134	0.879956	-0.643616	4.39134	0.366638	ENSG00000040531
ENSG00000040608	-1.19261	2.29537	0.062509	-1.44973	2.29537	0.0205332	-1.14776	2.29537	0.0698763	-2.29901	2.29537	0.00051452	ENSG00000040608
ENSG00000040633	0.215474	5.90776	0.783334	0.16793	5.90776	0.830972	0.020397	5.90776	0.978777	-1.42552	5.90776	0.00111545	ENSG00000040633
ENSG00000040933	-0.753205	3.51374	0.270269	-0.960637	3.51374	0.128496	-0.4917	3.51374	0.510196	-1.25269	3.51374	0.0329218	ENSG00000040933
ENSG00000041353	1.23376	1.68621	0.110206	1.32583	1.68621	0.0852136	0.315728	1.68621	0.710418	-0.033159	1.68621	0.964018	ENSG00000041353
ENSG00000041357	0.769674	8.31178	0.235293	1.37509	8.31178	0.000424783	0.116259	8.31178	0.884781	0.0427212	8.31178	0.95755	ENSG00000041357
ENSG00000041802	0.153243	6.8853	0.845948	0.0525608	6.8853	0.94705	0.0475901	6.8853	0.952002	-0.274774	6.8853	0.725805	ENSG00000041802
ENSG00000041880	0.0237448	4.93896	0.975088	0.370243	4.93896	0.628737	-0.441643	4.93896	0.559916	-0.98522	4.93896	0.116472	ENSG00000041880
ENSG00000041988	-0.0250128	4.6481	0.97629	0.020492	4.6481	0.978207	-0.396654	4.6481	0.604949	-1.14858	4.6481	0.0532004	ENSG00000041988
ENSG00000042062	2.32618	3.99205	6.16e-05	2.37696	3.99205	4.43e-05	2.38697	3.99205	3.08e-05	-0.338127	3.99205	0.684331	ENSG00000042062
ENSG00000042088	0.00881769	4.84457	0.990648	-0.254495	4.84457	0.745813	0.142286	4.84457	0.856883	-0.110313	4.84457	0.890002	ENSG00000042088
ENSG00000042286	0.339997	5.85623	0.659485	0.604701	5.85623	0.394382	-0.259415	5.85623	0.741086	-0.8139	5.85623	0.201872	ENSG00000042286
ENSG00000042317	-0.372943	2.26573	0.629055	-0.606274	2.26573	0.415301	0.0448352	2.26573	0.954237	-0.0341019	2.26573	0.964263	ENSG00000042317
ENSG00000042429	0.0815929	4.5436	0.91783	0.0214161	4.5436	0.978141	0.0603967	4.5436	0.939013	0.941371	4.5436	0.112406	ENSG00000042429
ENSG00000042445	-0.662756	6.20063	0.339158	-1.241	6.20063	0.00703497	-0.298656	6.20063	0.702147	-0.847127	6.20063	0.171404	ENSG00000042445
ENSG00000042493	-0.77712	6.64195	0.256773	-0.535962	6.64195	0.471415	-0.887962	6.64195	0.175112	-0.616912	6.64195	0.395799	ENSG00000042493
ENSG00000042753	-0.371027	7.67643	0.631316	-0.472773	7.67643	0.530313	-0.687309	7.67643	0.324524	-0.921223	7.67643	0.140983	ENSG00000042753
ENSG00000043093	0.0315365	4.60297	0.967676	-0.227188	4.60297	0.773056	0.0269008	4.60297	0.972217	-0.0462272	4.60297	0.954162	ENSG00000043093
ENSG00000043143	0.316093	6.17523	0.683052	0.892418	6.17523	0.132835	-0.605885	6.17523	0.394625	0.681021	6.17523	0.319776	ENSG00000043143
ENSG00000043514	-0.183714	3.70092	0.81629	-0.289712	3.70092	0.710009	0.373183	3.70092	0.625454	-0.00813528	3.70092	0.99194	ENSG00000043514
ENSG00000043591	-0.0416665	5.27629	0.95913	-0.655824	5.27629	0.34636	-0.511219	5.27629	0.489267	-0.827137	5.27629	0.192272	ENSG00000043591
ENSG00000044090	-0.0781943	2.25663	0.920812	0.217818	2.25663	0.782847	0.562583	2.25663	0.445902	0.507038	2.25663	0.503457	ENSG00000044090
ENSG00000044115	0.332974	7.4578	0.666383	0.467299	7.4578	0.534112	-0.179139	7.4578	0.821317	0.306199	7.4578	0.692901	ENSG00000044115
ENSG00000044446	-0.770548	3.05403	0.260863	-1.0038	3.05403	0.11592	0.264453	3.05403	0.734009	-0.586856	3.05403	0.422095	ENSG00000044446
ENSG00000044459	-0.169855	7.00669	0.83061	-0.249105	7.00669	0.751343	-0.0394495	7.00669	0.961666	0.00131592	7.00669	0.998145	ENSG00000044459
ENSG00000044574	0.938582	10.6717	0.110329	1.31647	10.6717	0.00402336	-0.583292	10.6717	0.418971	-1.40724	10.6717	0.00168787	ENSG00000044574
ENSG00000046647	-0.488222	3.06319	0.515621	-0.174032	3.06319	0.825976	-0.133894	3.06319	0.866694	-0.565872	3.06319	0.445073	ENSG00000046647
ENSG00000046651	0.535005	5.94764	0.463882	0.535209	5.94764	0.463717	0.295145	5.94764	0.703849	1.03284	5.94764	0.0529715	ENSG00000046651
ENSG00000047056	0.125836	2.82253	0.873659	0.113497	2.82253	0.88628	0.0915495	2.82253	0.907322	0.333074	2.82253	0.668965	ENSG00000047056
ENSG00000047188	-0.195069	5.28687	0.805383	-0.355469	5.28687	0.645549	-0.164837	5.28687	0.83568	-0.218965	5.28687	0.781411	ENSG00000047188
ENSG00000047230	-0.661525	3.63578	0.34682	-0.637609	3.63578	0.369418	-0.0255685	3.63578	0.975274	-0.807642	3.63578	0.227761	ENSG00000047230
ENSG00000047249	-0.135995	5.15641	0.864876	-0.388705	5.15641	0.61224	0.220425	5.15641	0.778129	0.671441	5.15641	0.334323	ENSG00000047249
ENSG00000047315	0.554171	6.03943	0.444642	0.554386	6.03943	0.444466	0.271559	6.03943	0.727334	0.0793694	6.03943	0.920208	ENSG00000047315
ENSG00000047346	0.170899	4.59969	0.827889	-0.13387	4.59969	0.866617	0.621393	4.59969	0.381964	0.791673	4.59969	0.232299	ENSG00000047346
ENSG00000047410	0.360574	9.18235	0.640189	0.318508	9.18235	0.68062	0.066076	9.18235	0.934081	0.265346	9.18235	0.733416	ENSG00000047410
ENSG00000047457	-3.16759	0.275091	0.0896985	-0.372074	0.275091	0.773869	0.574078	0.275091	0.604827	4.90392	0.275091	1.69e-08	ENSG00000047457
ENSG00000047578	0.450451	3.07359	0.549689	0.12273	3.07359	0.876776	-0.0834326	3.07359	0.916778	-0.803086	3.07359	0.251464	ENSG00000047578
ENSG00000047579	0.214294	5.70959	0.784561	0.0356698	5.70959	0.96372	0.0284675	5.70959	0.970875	-0.010319	5.70959	0.990339	ENSG00000047579
ENSG00000047621	0.0181398	6.20931	0.981742	-0.016027	6.20931	0.984816	-0.614693	6.20931	0.3859	-0.350891	6.20931	0.650642	ENSG00000047621
ENSG00000047634	0.332713	3.06379	0.670579	0.00283184	3.06379	0.998614	0.477021	3.06379	0.529414	2.23452	3.06379	1.48e-05	ENSG00000047634
ENSG00000047644	-0.359989	6.09896	0.641479	-0.563215	6.09896	0.437138	0.344353	6.09896	0.655428	-0.147544	6.09896	0.85294	ENSG00000047644
ENSG00000047648	-0.208562	2.90602	0.79056	0.539404	2.90602	0.463824	0.59064	2.90602	0.413586	0.146442	2.90602	0.853579	ENSG00000047648
ENSG00000047849	-0.0175328	8.48089	0.983449	0.188049	8.48089	0.812067	-0.382908	8.48089	0.624496	-0.394948	8.48089	0.613853	ENSG00000047849
ENSG00000047932	-0.0254248	6.00867	0.975404	-0.133905	6.00867	0.867603	-0.0173523	6.00867	0.983484	0.33327	6.00867	0.666007	ENSG00000047932
ENSG00000048028	0.517838	5.19224	0.481131	0.645576	5.19224	0.354999	0.337367	5.19224	0.662149	0.192654	5.19224	0.806526	ENSG00000048028
ENSG00000048052	2.3305	4.68997	1.58e-07	2.62377	4.68997	3.25e-09	0.0873562	4.68997	0.912922	5.47458	4.68997	1.31e-22	ENSG00000048052
ENSG00000048140	-0.63322	4.35707	0.372239	-0.284527	4.35707	0.716121	-0.357758	4.35707	0.643116	-1.44055	4.35707	0.00561483	ENSG00000048140
ENSG00000048162	0.449759	5.12865	0.550077	0.243498	5.12865	0.755441	-0.0190708	5.12865	0.981697	0.52123	5.12865	0.477908	ENSG00000048162
ENSG00000048392	0.167794	4.50922	0.831039	-0.0528025	4.50922	0.947795	0.196449	4.50922	0.802183	1.12508	4.50922	0.0383887	ENSG00000048392
ENSG00000048405	0.0623751	4.49088	0.936814	0.0611488	4.49088	0.938101	0.113531	4.49088	0.885416	-0.329631	4.49088	0.670261	ENSG00000048405
ENSG00000048471	-0.101909	2.71045	0.898187	-1.06176	2.71045	0.100517	-0.422718	2.71045	0.578141	-0.832864	2.71045	0.231631	ENSG00000048471
ENSG00000048544	-0.204952	6.21744	0.795468	-0.251428	6.21744	0.749073	-0.387542	6.21744	0.614481	-0.870025	6.21744	0.152958	ENSG00000048544
ENSG00000048649	0.269958	7.9596	0.728825	0.446736	7.9596	0.561973	0.0635555	7.9596	0.937252	-0.898588	7.9596	0.128266	ENSG00000048649
ENSG00000048707	-0.208077	4.97101	0.792365	-0.165258	4.97101	0.835182	-0.752186	4.97101	0.256333	-1.30245	4.97101	0.00811253	ENSG00000048707
ENSG00000048828	-0.261969	9.41505	0.738738	-0.230648	9.41505	0.769925	-0.404074	9.41505	0.598778	-0.569765	9.41505	0.430725	ENSG00000048828
ENSG00000048991	-0.151754	5.14145	0.848725	-0.499966	5.14145	0.500403	0.027407	5.14145	0.971965	-0.195046	5.14145	0.805293	ENSG00000048991
ENSG00000049130	1.75354	3.91212	0.000253398	1.36032	3.91212	0.0116685	-0.61466	3.91212	0.399089	0.312665	3.91212	0.688123	ENSG00000049130
ENSG00000049167	-0.191621	1.84491	0.809234	-0.486848	1.84491	0.536931	0.591068	1.84491	0.430678	-0.469864	1.84491	0.557462	ENSG00000049167
ENSG00000049192	1.75065	5.05909	0.000509226	2.17179	5.05909	5.38e-06	0.0750403	5.05909	0.923663	1.40398	5.05909	0.0120824	ENSG00000049192
ENSG00000049239	-0.561244	3.88005	0.441236	-0.494695	3.88005	0.506367	0.528756	3.88005	0.4708	-1.25111	3.88005	0.0273403	ENSG00000049239
ENSG00000049245	0.176492	6.21753	0.822711	0.311982	6.21753	0.687153	0.154819	6.21753	0.845068	-0.379612	6.21753	0.622981	ENSG00000049245
ENSG00000049246	-0.11345	3.45589	0.886526	-0.0803055	3.45589	0.919636	0.384576	3.45589	0.614031	0.574205	3.45589	0.428726	ENSG00000049246
ENSG00000049249	2.57262	1.17482	0.00454736	3.83023	1.17482	5.18e-06	0.87949	1.17482	0.394746	5.04349	1.17482	1.57e-09	ENSG00000049249
ENSG00000049323	0.374833	4.34185	0.624499	0.191805	4.34185	0.807182	0.252517	4.34185	0.74622	-0.536198	4.34185	0.464941	ENSG00000049323
ENSG00000049449	0.609677	5.57469	0.389977	0.67394	5.57469	0.327738	0.157665	5.57469	0.841255	0.538708	5.57469	0.460598	ENSG00000049449
ENSG00000049541	-0.423339	5.31955	0.580186	-0.251246	5.31955	0.749219	-0.00916313	5.31955	0.99168	-0.130068	5.31955	0.870811	ENSG00000049541
ENSG00000049618	-0.00239373	5.92571	0.998425	-0.206616	5.92571	0.79379	0.278225	5.92571	0.720672	-0.880366	5.92571	0.148206	ENSG00000049618
ENSG00000049656	-0.16679	6.96212	0.833775	-0.20516	6.96212	0.795233	-0.431607	6.96212	0.569912	0.0206581	6.96212	0.978495	ENSG00000049656
ENSG00000049759	1.0908	7.76229	0.0274547	0.905964	7.76229	0.120655	0.254736	7.76229	0.74399	1.05603	7.76229	0.0389138	ENSG00000049759
ENSG00000049769	-0.500529	0.889974	0.540204	-0.337886	0.889974	0.67954	0.0139172	0.889974	0.989416	2.51892	0.889974	3.33e-06	ENSG00000049769
ENSG00000049860	0.388325	5.3502	0.611243	0.336647	5.3502	0.662503	0.0168348	5.3502	0.981443	0.446418	5.3502	0.554838	ENSG00000049860
ENSG00000049883	-0.0445628	3.32262	0.955991	0.0491535	3.32262	0.950251	0.0578142	3.32262	0.940907	-0.508822	3.32262	0.501297	ENSG00000049883
ENSG00000050165	-0.056671	5.46489	0.943971	0.281724	5.46489	0.717299	0.590891	5.46489	0.408103	0.475868	5.46489	0.523476	ENSG00000050165
ENSG00000050327	-0.805653	4.21445	0.24468	-0.671693	4.21445	0.352112	-0.353247	4.21445	0.649359	-1.32406	4.21445	0.0349096	ENSG00000050327
ENSG00000050344	0.570637	6.618	0.428128	1.44163	6.618	0.000152051	0.0262245	6.618	0.973199	0.208683	6.618	0.790311	ENSG00000050344
ENSG00000050393	0.024165	5.20165	0.975646	-0.107931	5.20165	0.89283	0.242968	5.20165	0.755866	0.469597	5.20165	0.530924	ENSG00000050393
ENSG00000050405	0.541345	9.31801	0.457416	1.1108	9.31801	0.0229348	0.223291	9.31801	0.775365	1.66262	9.31801	1.73e-06	ENSG00000050405
ENSG00000050426	0.0808845	4.5465	0.918501	0.245904	4.5465	0.753015	0.343254	4.5465	0.655977	0.136958	4.5465	0.862349	ENSG00000050426
ENSG00000050748	-0.724484	3.74033	0.293354	-1.55021	3.74033	0.00354689	0.126641	3.74033	0.871954	-0.209945	3.74033	0.790198	ENSG00000050748
ENSG00000050820	-0.0523162	5.56398	0.948505	0.0761515	5.56398	0.923468	-0.275488	5.56398	0.725097	-0.966606	5.56398	0.0946661	ENSG00000050820
ENSG00000051009	0.200501	4.14686	0.798325	0.363307	4.14686	0.635676	-0.242325	4.14686	0.758024	-1.11728	4.14686	0.0538871	ENSG00000051009
ENSG00000051108	0.218284	5.76122	0.780505	0.875852	5.76122	0.148523	-0.0564273	5.76122	0.944374	0.206517	5.76122	0.792442	ENSG00000051108
ENSG00000051128	-0.78467	7.13602	0.237668	-0.777546	7.13602	0.243803	-0.229356	7.13602	0.772391	-0.511074	7.13602	0.491989	ENSG00000051128
ENSG00000051180	-0.240156	5.72604	0.760331	-0.297934	5.72604	0.70274	-0.060987	5.72604	0.939926	-0.447026	5.72604	0.553953	ENSG00000051180
ENSG00000051341	0.284366	5.35835	0.714601	0.25814	5.35835	0.740791	-0.404282	5.35835	0.597305	-0.554886	5.35835	0.445606	ENSG00000051341
ENSG00000051382	-0.245402	3.9589	0.754839	-0.336866	3.9589	0.663177	0.124301	3.9589	0.874828	-1.99334	3.9589	2.88e-05	ENSG00000051382
ENSG00000051596	-0.844112	1.64323	0.268019	-1.24611	1.64323	0.10065	-0.138852	1.64323	0.862517	-0.487918	1.64323	0.542128	ENSG00000051596
ENSG00000051620	0.4251	7.15655	0.581182	0.397544	7.15655	0.607743	0.0423204	7.15655	0.958028	-0.425103	7.15655	0.581153	ENSG00000051620
ENSG00000051825	0.0713561	5.33119	0.927817	-0.320612	5.33119	0.679959	-0.168313	5.33119	0.832177	0.078436	5.33119	0.920817	ENSG00000051825
ENSG00000052126	-0.635138	4.4183	0.368201	-0.428612	4.4183	0.571557	0.505409	4.4183	0.49355	-0.699414	4.4183	0.309972	ENSG00000052126
ENSG00000052723	-0.236613	4.6165	0.764355	-0.452902	4.6165	0.549361	0.0111262	4.6165	0.987485	-0.240549	4.6165	0.760061	ENSG00000052723
ENSG00000052749	0.696171	4.2924	0.308504	0.376702	4.2924	0.622762	-0.418454	4.2924	0.581724	-0.827123	4.2924	0.206457	ENSG00000052749
ENSG00000052795	0.230901	5.62566	0.76797	-0.0491375	5.62566	0.951767	0.0924559	5.62566	0.907738	0.534195	5.62566	0.464842	ENSG00000052795
ENSG00000052802	1.00353	7.50167	0.0611439	0.805089	7.50167	0.203298	0.579819	7.50167	0.418748	0.0272089	7.50167	0.972208	ENSG00000052802
ENSG00000052841	0.00904608	6.20602	0.990695	0.189418	6.20602	0.809442	-0.077054	6.20602	0.92465	-0.35979	6.20602	0.642268	ENSG00000052841
ENSG00000053254	-0.843536	7.09483	0.17101	-1.14712	7.09483	0.0163476	-0.301865	7.09483	0.698998	-1.55865	7.09483	2.17e-05	ENSG00000053254
ENSG00000053371	-0.925818	6.72556	0.116058	-1.23463	6.72556	0.00963698	-0.599234	6.72556	0.402229	-0.766783	6.72556	0.243305	ENSG00000053371
ENSG00000053372	0.19649	6.6049	0.802273	0.237444	6.6049	0.761302	-0.231237	6.6049	0.769164	-0.899001	6.6049	0.129941	ENSG00000053372
ENSG00000053501	0.195043	2.91023	0.804	0.109313	2.91023	0.890108	-0.0364567	2.91023	0.964414	-0.384085	2.91023	0.618341	ENSG00000053501
ENSG00000053524	2.27503	2.0385	0.00748236	2.75422	2.0385	0.00084305	1.97274	2.0385	0.0199391	6.66063	2.0385	6.09e-16	ENSG00000053524
ENSG00000053747	-0.809804	3.28588	0.246485	0.723559	3.28588	0.299044	-0.366294	3.28588	0.633837	2.39449	3.28588	9.47e-08	ENSG00000053747
ENSG00000053770	-0.0206671	4.62255	0.979987	-0.12806	4.62255	0.872274	0.45535	4.62255	0.543647	0.399995	4.62255	0.599258	ENSG00000053770
ENSG00000053900	-0.0537697	4.7197	0.946894	-0.255373	4.7197	0.744973	-0.194613	4.7197	0.805877	-0.257608	4.7197	0.742573	ENSG00000053900
ENSG00000054116	-0.0408951	6.5956	0.960221	-0.0116314	6.5956	0.98921	-0.0604991	6.5956	0.941064	0.45259	6.5956	0.552924	ENSG00000054116
ENSG00000054118	0.33525	7.9349	0.664142	0.229414	7.9349	0.769256	0.197757	7.9349	0.800941	-0.0894406	7.9349	0.912171	ENSG00000054118
ENSG00000054148	0.134418	3.12564	0.86473	0.273103	3.12564	0.726566	0.374082	3.12564	0.62545	-0.0813373	3.12564	0.918018	ENSG00000054148
ENSG00000054219	-0.0261291	2.51238	0.973074	0.612364	2.51238	0.401874	0.909267	2.51238	0.166169	-0.848964	2.51238	0.249397	ENSG00000054219
ENSG00000054267	0.466589	8.04206	0.534522	0.54495	8.04206	0.453754	0.1373	8.04206	0.862477	0.620636	8.04206	0.378244	ENSG00000054267
ENSG00000054282	0.2851	4.65593	0.71379	-0.0312186	4.65593	0.969377	0.0270624	4.65593	0.972549	0.144427	4.65593	0.854948	ENSG00000054282
ENSG00000054523	-0.304723	6.5046	0.696076	-0.335508	6.5046	0.665494	-0.503562	6.5046	0.497029	0.216325	6.5046	0.782486	ENSG00000054523
ENSG00000054598	1.92717	2.81582	0.000571538	2.93988	2.81582	1.67e-08	0.204771	2.81582	0.799114	4.50542	2.81582	1.25e-15	ENSG00000054598
ENSG00000054611	-0.137734	5.1872	0.862818	-0.402754	5.1872	0.598914	-0.157252	5.1872	0.843301	-1.02905	5.1872	0.0656701	ENSG00000054611
ENSG00000054654	0.479053	9.69455	0.520083	-0.0367027	9.69455	0.964569	-0.407591	9.69455	0.594096	-0.22978	9.69455	0.771252	ENSG00000054654
ENSG00000054793	-0.688284	2.89296	0.329684	-0.85857	2.89296	0.200562	-0.522516	2.89296	0.480774	-0.813425	2.89296	0.237387	ENSG00000054793
ENSG00000054965	-0.433729	3.86783	0.566667	-1.1989	3.86783	0.029053	-0.290508	3.86783	0.709942	-0.881532	3.86783	0.168443	ENSG00000054965
ENSG00000054967	0.174221	3.14019	0.82481	0.214041	3.14019	0.785059	-0.122051	3.14019	0.877952	0.200827	3.14019	0.798854	ENSG00000054967
ENSG00000054983	-0.521796	3.41053	0.481241	-0.984444	3.41053	0.121145	-0.032231	3.41053	0.96859	-0.204168	3.41053	0.795462	ENSG00000054983
ENSG00000055044	0.478944	7.98701	0.521093	0.313671	7.98701	0.685454	0.201698	7.98701	0.796995	0.868502	7.98701	0.149269	ENSG00000055044
ENSG00000055070	0.12014	6.33399	0.87925	0.186324	6.33399	0.812513	-0.193357	6.33399	0.807055	-0.161701	6.33399	0.838755	ENSG00000055070
ENSG00000055130	0.223688	5.44125	0.775208	0.176539	5.44125	0.822567	0.326152	5.44125	0.672919	0.521705	5.44125	0.477389	ENSG00000055130
ENSG00000055147	-0.181196	4.18609	0.819122	-0.162666	4.18609	0.837607	0.12723	4.18609	0.871783	-0.00542163	4.18609	0.995024	ENSG00000055147
ENSG00000055208	-0.203401	6.42957	0.796971	0.280428	6.42957	0.718531	0.0917092	6.42957	0.907476	1.08572	6.42957	0.0311483	ENSG00000055208
ENSG00000055211	-0.0780425	7.40541	0.92388	-0.13659	7.40541	0.865412	0.099291	7.40541	0.90201	-0.421488	7.40541	0.584751	ENSG00000055211
ENSG00000055332	0.478494	8.58307	0.521055	0.705272	8.58307	0.296293	-0.21439	8.58307	0.786077	-0.175239	8.58307	0.825304	ENSG00000055332
ENSG00000055483	0.511823	6.12601	0.487169	0.544798	6.12601	0.454028	-0.245255	6.12601	0.755203	0.590669	6.12601	0.408287	ENSG00000055483
ENSG00000055609	-0.0555794	6.65552	0.945525	0.000944124	6.65552	0.998418	-0.413921	6.65552	0.588675	-0.455033	6.65552	0.546647	ENSG00000055609
ENSG00000055917	-0.0850699	6.1674	0.916635	-0.051884	6.1674	0.9494	-0.0429373	6.1674	0.958248	-0.454094	6.1674	0.549122	ENSG00000055917
ENSG00000055950	-0.375201	6.43422	0.628194	-0.431528	6.43422	0.573107	-0.0300234	6.43422	0.970971	-0.473336	6.43422	0.528885	ENSG00000055950
ENSG00000056050	-0.618164	5.52268	0.382812	-0.866392	5.52268	0.158123	-0.173286	5.52268	0.827228	-0.398316	5.52268	0.6039	ENSG00000056050
ENSG00000056097	0.16243	7.0792	0.83691	0.269835	7.0792	0.729012	0.233776	7.0792	0.764919	0.715956	7.0792	0.285819	ENSG00000056097
ENSG00000056277	0.677441	2.44237	0.358509	0.471594	2.44237	0.541585	0.484195	2.44237	0.525473	0.417882	2.44237	0.596396	ENSG00000056277
ENSG00000056558	4.09276	5.33323	6e-18	5.62981	5.33323	6.2e-24	1.17878	5.33323	0.0370618	2.85577	5.33323	9.97e-11	ENSG00000056558
ENSG00000056586	-0.0171523	6.76337	0.983722	-0.0729063	6.76337	0.928953	-0.352	6.76337	0.649836	-0.0289545	6.76337	0.971882	ENSG00000056586
ENSG00000056972	1.17498	5.36381	0.0155591	1.30704	5.36381	0.00316795	1.01234	5.36381	0.0648372	0.485029	5.36381	0.514795	ENSG00000056972
ENSG00000057019	0.452081	7.45602	0.558128	0.831526	7.45602	0.179877	-0.580838	7.45602	0.41941	-1.25359	7.45602	0.00498232	ENSG00000057019
ENSG00000057252	0.256458	5.6305	0.742446	0.169857	5.6305	0.829251	0.308102	5.6305	0.690927	-0.640828	5.6305	0.361005	ENSG00000057252
ENSG00000057294	-0.426678	5.03726	0.574078	-0.46183	5.03726	0.538774	-0.491586	5.03726	0.509003	-0.264832	5.03726	0.735572	ENSG00000057294
ENSG00000057608	0.262069	6.75656	0.736742	0.458438	6.75656	0.546653	0.0777083	6.75656	0.923401	-0.371724	6.75656	0.632052	ENSG00000057608
ENSG00000057663	-0.133002	4.63047	0.867412	0.351565	4.63047	0.64741	0.250569	4.63047	0.748109	1.15145	4.63047	0.0279636	ENSG00000057663
ENSG00000057704	-0.635443	2.02164	0.393841	-0.712741	2.02164	0.335602	0.132832	2.02164	0.866449	-0.628744	2.02164	0.40786	ENSG00000057704
ENSG00000057757	-0.228288	5.77918	0.772181	-0.679608	5.77918	0.322902	-0.184557	5.77918	0.815918	-0.145181	5.77918	0.855313	ENSG00000057757
ENSG00000057935	-0.53601	4.3635	0.466801	-0.790992	4.3635	0.236837	0.119508	4.3635	0.87906	-0.375134	4.3635	0.625627	ENSG00000057935
ENSG00000058056	-0.220846	5.06492	0.779628	-0.807618	5.06492	0.208616	0.0385661	5.06492	0.961602	-0.972407	5.06492	0.0955161	ENSG00000058056
ENSG00000058063	-0.378849	4.71578	0.621904	-0.569722	4.71578	0.433291	-0.102653	4.71578	0.89826	-0.345329	4.71578	0.655124	ENSG00000058063
ENSG00000058085	4.35312	4.21074	1.38e-20	5.78949	4.21074	2.38e-26	0.378834	4.21074	0.623486	4.00837	4.21074	1.92e-18	ENSG00000058085
ENSG00000058091	-0.38804	5.10743	0.61286	-0.513702	5.10743	0.486689	0.196732	5.10743	0.802076	-1.35172	5.10743	0.00440123	ENSG00000058091
ENSG00000058262	0.103268	7.77714	0.896078	0.172283	7.77714	0.826561	-0.178612	7.77714	0.821871	-0.388073	7.77714	0.613751	ENSG00000058262
ENSG00000058272	0.206273	7.82946	0.792423	0.21531	7.82946	0.783379	0.0926338	7.82946	0.907776	-0.0727134	7.82946	0.92873	ENSG00000058272
ENSG00000058453	-0.664288	3.45346	0.357069	-1.3719	3.45346	0.0244079	-0.131196	3.45346	0.870171	-1.6602	3.45346	0.00659476	ENSG00000058453
ENSG00000058600	0.366049	3.88283	0.633073	0.0520714	3.88283	0.947403	0.183347	3.88283	0.815444	-0.814086	3.88283	0.222064	ENSG00000058600
ENSG00000058668	0.091818	6.3904	0.908442	-0.203492	6.3904	0.796907	-0.423293	6.3904	0.580029	-1.22145	6.3904	0.00890872	ENSG00000058668
ENSG00000058673	0.209981	6.38209	0.788724	0.288119	6.38209	0.710755	0.294066	6.38209	0.704785	0.302785	6.38209	0.696233	ENSG00000058673
ENSG00000058729	-0.0235446	4.62213	0.977059	0.0208876	4.62213	0.978724	-0.0218796	4.62213	0.978848	1.39351	4.62213	0.00150293	ENSG00000058729
ENSG00000058799	0.21475	4.68928	0.784132	0.201204	4.68928	0.797743	0.0998337	4.68928	0.899167	0.244011	4.68928	0.755051	ENSG00000058799
ENSG00000058804	-0.56543	5.77306	0.434984	-0.757033	5.77306	0.250109	-0.0898692	5.77306	0.911347	-0.511618	5.77306	0.488842	ENSG00000058804
ENSG00000059122	-0.91855	3.25449	0.151558	-1.39193	3.25449	0.0120204	-0.234051	3.25449	0.766219	-0.303885	3.25449	0.695714	ENSG00000059122
ENSG00000059145	-0.62058	3.68194	0.384254	-0.532191	3.68194	0.469365	-0.267888	3.68194	0.732402	-0.926508	3.68194	0.146171	ENSG00000059145
ENSG00000059377	-1.14819	1.81154	0.113539	0.11262	1.81154	0.888833	-0.600089	1.81154	0.428285	1.28656	1.81154	0.04208	ENSG00000059377
ENSG00000059378	0.582858	6.77499	0.41586	1.11844	6.77499	0.0217139	-0.369284	6.77499	0.633502	0.854009	6.77499	0.162642	ENSG00000059378
ENSG00000059573	-0.273113	3.35309	0.727587	-0.844092	3.35309	0.215396	-0.299361	3.35309	0.701615	-0.211518	3.35309	0.788642	ENSG00000059573
ENSG00000059588	-0.504907	2.88349	0.498307	-0.625657	2.88349	0.38674	-0.00911698	2.88349	0.991796	-0.388709	2.88349	0.611882	ENSG00000059588
ENSG00000059691	0.11154	4.5544	0.887574	-0.202337	4.5544	0.797979	-0.110668	4.5544	0.889933	-0.0479716	4.5544	0.95248	ENSG00000059691
ENSG00000059728	0.708855	5.69366	0.294052	1.5519	5.69366	3.52e-05	-0.127479	5.69366	0.872803	2.97935	5.69366	8.03e-18	ENSG00000059728
ENSG00000059758	0.579975	5.37889	0.419417	1.25666	5.37889	0.00662813	0.380268	5.37889	0.618894	0.111811	5.37889	0.887511	ENSG00000059758
ENSG00000059769	0.388881	4.63606	0.610872	0.339639	4.63606	0.659734	0.0721282	4.63606	0.927366	0.605564	4.63606	0.395103	ENSG00000059769
ENSG00000059804	0.460995	5.17795	0.538155	-0.116533	5.17795	0.883919	0.494276	5.17795	0.504844	-0.201513	5.17795	0.798587	ENSG00000059804
ENSG00000059915	2.27698	2.16325	0.0044696	3.45623	2.16325	4.41e-06	1.35011	2.16325	0.11782	5.31162	2.16325	9.15e-12	ENSG00000059915
ENSG00000060069	0.21633	3.59354	0.782469	0.264438	3.59354	0.734479	0.438238	3.59354	0.56082	-0.276373	3.59354	0.722946	ENSG00000060069
ENSG00000060138	0.260315	9.18567	0.738409	0.298637	9.18567	0.700325	0.203634	9.18567	0.795034	0.278057	9.18567	0.720768	ENSG00000060138
ENSG00000060237	-0.015527	7.79899	0.985412	-0.00720718	7.79899	0.993714	-0.351799	7.79899	0.64996	0.522963	7.79899	0.475955	ENSG00000060237
ENSG00000060339	0.369649	8.35358	0.631077	0.217814	8.35358	0.780861	0.19308	8.35358	0.805631	0.558984	8.35358	0.439668	ENSG00000060339
ENSG00000060491	0.70118	6.76907	0.310707	1.25895	6.76907	0.0171943	-0.0610723	6.76907	0.940713	0.648143	6.76907	0.359395	ENSG00000060491
ENSG00000060642	1.09959	2.50416	0.0902968	1.5219	2.50416	0.0081374	0.612994	2.50416	0.404729	2.27226	2.50416	2.64e-06	ENSG00000060642
ENSG00000060656	-1.36129	3.06536	0.0398355	-1.65369	3.06536	0.012423	0.635864	3.06536	0.38274	-1.11716	3.06536	0.11473	ENSG00000060656
ENSG00000060688	-0.00162138	3.54791	0.998886	-0.00319994	3.54791	0.997183	-0.0472021	3.54791	0.953428	0.43363	3.54791	0.565919	ENSG00000060688
ENSG00000060749	-0.313137	6.02312	0.687646	-0.454921	6.02312	0.547368	-0.136459	6.02312	0.864524	0.444975	6.02312	0.55714	ENSG00000060749
ENSG00000060762	-0.102524	3.82118	0.898192	0.136727	3.82118	0.862601	0.139465	3.82118	0.859131	0.552364	3.82118	0.45787	ENSG00000060762
ENSG00000060982	0.518097	6.2634	0.480857	0.0131009	6.2634	0.986073	-0.112785	6.2634	0.888019	-1.14771	6.2634	0.0217725	ENSG00000060982
ENSG00000061273	0.691303	9.74795	0.330648	0.382968	9.74795	0.616737	0.374421	9.74795	0.625068	-1.46006	9.74795	0.0101291	ENSG00000061273
ENSG00000061676	0.0590076	5.89808	0.940002	0.0951346	5.89808	0.903843	0.143985	5.89808	0.854822	0.0169836	5.89808	0.98217	ENSG00000061676
ENSG00000061794	0.16211	5.51249	0.836857	0.0462347	5.51249	0.9531	0.12194	5.51249	0.877199	0.107628	5.51249	0.891657	ENSG00000061794
ENSG00000061936	0.164003	6.79424	0.835611	0.118265	6.79424	0.882226	-0.21829	6.79424	0.782082	-0.206235	6.79424	0.794145	ENSG00000061936
ENSG00000061938	0.126915	4.30094	0.872246	0.737407	4.30094	0.272091	-0.1184	4.30094	0.881959	-0.192861	4.30094	0.806708	ENSG00000061938
ENSG00000061987	-0.163575	4.58904	0.836908	-0.241883	4.58904	0.758497	-0.498068	4.58904	0.502389	-0.268372	4.58904	0.731856	ENSG00000061987
ENSG00000062194	0.425531	7.92034	0.582109	0.932619	7.92034	0.102135	0.0696002	7.92034	0.931372	2.23576	7.92034	2.65e-16	ENSG00000062194
ENSG00000062282	-0.161542	1.98278	0.844614	-0.445387	1.98278	0.599838	1.61658	1.98278	0.0141976	2.34585	1.98278	0.00019605	ENSG00000062282
ENSG00000062370	-0.78432	1.76309	0.287913	-0.611794	1.76309	0.42053	0.161607	1.76309	0.837719	-0.285873	1.76309	0.716195	ENSG00000062370
ENSG00000062485	0.218815	5.93374	0.780007	-0.049592	5.93374	0.951245	0.190362	5.93374	0.808441	0.199624	5.93374	0.799308	ENSG00000062485
ENSG00000062582	0.25085	2.26179	0.753202	0.935294	2.26179	0.18252	-0.135623	2.26179	0.864727	1.96914	2.26179	0.000507354	ENSG00000062582
ENSG00000062598	0.142206	4.89681	0.856781	0.406392	4.89681	0.592847	-0.204599	4.89681	0.795817	0.536399	4.89681	0.462933	ENSG00000062598
ENSG00000062650	0.328102	7.26747	0.671161	0.263397	7.26747	0.735417	0.165169	7.26747	0.834172	1.17668	7.26747	0.0104776	ENSG00000062650
ENSG00000062716	1.01866	7.54331	0.0538985	1.24894	7.54331	0.00381186	0.313683	7.54331	0.685438	0.0985785	7.54331	0.901507	ENSG00000062716
ENSG00000062725	-0.192258	5.60022	0.808137	-0.0651814	5.60022	0.935859	-0.19318	5.60022	0.807247	0.766708	5.60022	0.23997	ENSG00000062725
ENSG00000062822	-0.648745	1.71188	0.406805	-0.103545	1.71188	0.896286	-0.567997	1.71188	0.464466	-0.182147	1.71188	0.82036	ENSG00000062822
ENSG00000063046	0.148975	5.74747	0.850249	-0.179132	5.74747	0.821284	0.166696	5.74747	0.832313	0.626674	5.74747	0.372871	ENSG00000063046
ENSG00000063169	0.0819573	2.40836	0.917814	0.25777	2.40836	0.743228	0.428256	2.40836	0.574576	-0.380866	2.40836	0.626344	ENSG00000063169
ENSG00000063177	-0.191729	9.73288	0.808868	-0.0532645	9.73288	0.947904	0.102348	9.73288	0.897149	0.50598	9.73288	0.493163	ENSG00000063177
ENSG00000063180	-0.573018	1.79372	0.474415	-0.353069	1.79372	0.663565	0.19258	1.79372	0.811388	-0.195284	1.79372	0.810762	ENSG00000063180
ENSG00000063241	-0.141415	3.78983	0.860525	0.0928958	3.78983	0.905924	-0.613021	3.78983	0.409663	-0.496456	3.78983	0.518381	ENSG00000063241
ENSG00000063244	0.205866	4.96925	0.79304	0.333971	4.96925	0.665174	-0.866986	4.96925	0.162012	0.703461	4.96925	0.300135	ENSG00000063244
ENSG00000063245	-0.258268	5.32874	0.742275	-0.351935	5.32874	0.648901	-0.319429	5.32874	0.681346	-0.368963	5.32874	0.631826	ENSG00000063245
ENSG00000063322	-0.2445	5.63396	0.755978	-0.578838	5.63396	0.421684	-0.180507	5.63396	0.819962	0.491854	5.63396	0.507549	ENSG00000063322
ENSG00000063438	1.06208	3.44012	0.0661992	1.13036	3.44012	0.0434716	-0.278425	3.44012	0.721061	-0.888758	3.44012	0.187135	ENSG00000063438
ENSG00000063601	-0.142409	3.61146	0.857748	-0.0398437	3.61146	0.960543	-0.375506	3.61146	0.624448	-1.04931	3.61146	0.0905481	ENSG00000063601
ENSG00000063660	-0.0372921	2.56698	0.963278	-0.437562	2.56698	0.565467	-1.09084	2.56698	0.0842187	-1.09515	2.56698	0.0999367	ENSG00000063660
ENSG00000063854	-0.580105	5.74095	0.420382	-1.02613	5.74095	0.0594468	-0.0615794	5.74095	0.939321	-0.21451	5.74095	0.785918	ENSG00000063854
ENSG00000063978	0.441144	4.13621	0.558542	0.233376	4.13621	0.76557	0.546844	4.13621	0.454459	0.561445	4.13621	0.442141	ENSG00000063978
ENSG00000064012	0.788815	5.75133	0.219978	1.23447	5.75133	0.00670101	0.150516	5.75133	0.848556	0.611251	5.75133	0.388364	ENSG00000064012
ENSG00000064042	-0.351692	4.82794	0.648612	-0.259722	4.82794	0.740416	0.0479047	4.82794	0.951656	0.423109	4.82794	0.57681	ENSG00000064042
ENSG00000064102	-0.0571539	5.10983	0.943483	-0.317107	5.10983	0.683301	-0.129858	5.10983	0.870675	0.00855795	5.10983	0.990913	ENSG00000064102
ENSG00000064115	-0.960638	6.27692	0.0941144	-1.25552	6.27692	0.00779054	-0.247303	6.27692	0.753409	-0.185328	6.27692	0.815337	ENSG00000064115
ENSG00000064199	0.392891	2.87508	0.606448	0.212338	2.87508	0.786778	0.0801894	2.87508	0.918845	-0.127139	2.87508	0.871371	ENSG00000064199
ENSG00000064205	-1.42271	2.95834	0.0482726	-1.96015	2.95834	0.00740865	-0.486177	2.95834	0.537244	-0.535454	2.95834	0.501086	ENSG00000064205
ENSG00000064225	0.433052	5.24813	0.568229	0.305022	5.24813	0.694025	0.382005	5.24813	0.618997	-0.434239	5.24813	0.566686	ENSG00000064225
ENSG00000064313	0.228582	6.01649	0.770247	0.102893	6.01649	0.89684	0.116573	6.01649	0.883101	0.55068	6.01649	0.448252	ENSG00000064313
ENSG00000064393	-0.00977666	6.63878	0.991101	0.265555	6.63878	0.733269	-0.449151	6.63878	0.55248	-1.07139	6.63878	0.0384305	ENSG00000064393
ENSG00000064419	-0.00834284	6.64685	0.992533	-0.035702	6.64685	0.965239	-0.166259	6.64685	0.834232	-0.948597	6.64685	0.0964787	ENSG00000064419
ENSG00000064545	-0.56856	5.60432	0.44229	-1.20163	5.60432	0.0471954	0.0188333	5.60432	0.978755	-0.705966	5.60432	0.321556	ENSG00000064545
ENSG00000064607	-0.447716	5.96293	0.553665	-0.698064	5.96293	0.304962	-0.342002	5.96293	0.659093	-0.312817	5.96293	0.687955	ENSG00000064607
ENSG00000064651	2.74131	7.05037	1.56e-14	2.41578	7.05037	4.02e-12	0.232769	7.05037	0.765944	-0.447955	7.05037	0.552585	ENSG00000064651
ENSG00000064652	-1.02503	3.99891	0.0815943	-0.79166	3.99891	0.231429	-0.204745	3.99891	0.795746	-0.883389	3.99891	0.167274	ENSG00000064652
ENSG00000064666	-0.915326	3.05095	0.206212	-0.979061	3.05095	0.176058	-0.543105	3.05095	0.477766	-0.521411	3.05095	0.503401	ENSG00000064666
ENSG00000064687	-0.723276	3.08345	0.308471	-1.48285	3.08345	0.0147976	0.0706051	3.08345	0.927962	-0.682325	3.08345	0.347275	ENSG00000064687
ENSG00000064703	0.0549478	5.08815	0.944528	0.197052	5.08815	0.801909	0.165642	5.08815	0.833319	0.961884	5.08815	0.0939983	ENSG00000064703
ENSG00000064726	0.0320152	3.77154	0.967126	0.021492	3.77154	0.977838	-0.0771836	3.77154	0.923756	0.759077	3.77154	0.270431	ENSG00000064726
ENSG00000064763	-0.276613	3.56809	0.724044	0.224809	3.56809	0.774197	0.0659701	3.56809	0.932619	-0.279366	3.56809	0.721028	ENSG00000064763
ENSG00000064932	0.842013	6.13744	0.173378	1.0947	6.13744	0.0297888	0.995072	6.13744	0.0684291	-0.975296	6.13744	0.090728	ENSG00000064932
ENSG00000064933	0.0183553	5.5024	0.980914	-0.211772	5.5024	0.78862	0.0696301	5.5024	0.929613	-0.0137875	5.5024	0.986881	ENSG00000064933
ENSG00000064961	-0.220875	6.1454	0.779549	-0.213414	6.1454	0.787002	0.0253207	6.1454	0.974417	0.119046	6.1454	0.880943	ENSG00000064961
ENSG00000064989	1.4776	4.48448	0.00456592	0.788497	4.48448	0.24858	1.78436	4.48448	0.000183498	0.156896	4.48448	0.843694	ENSG00000064989
ENSG00000064995	-0.246531	6.00702	0.753978	-0.466347	6.00702	0.534654	-0.313367	6.00702	0.687514	-1.57595	6.00702	7.67e-05	ENSG00000064995
ENSG00000064999	-0.0770024	4.01101	0.923442	0.106762	4.01101	0.892462	0.0854274	4.01101	0.913685	-1.33892	4.01101	0.0143212	ENSG00000064999
ENSG00000065000	0.246282	7.4011	0.752427	0.181501	7.4011	0.817464	-0.097795	7.4011	0.903775	-0.596397	7.4011	0.404011	ENSG00000065000
ENSG00000065029	-0.319883	3.12265	0.682095	-0.249993	3.12265	0.751152	0.0458614	3.12265	0.952771	-0.545601	3.12265	0.46916	ENSG00000065029
ENSG00000065054	0.561933	5.5703	0.440185	0.551928	5.5703	0.449973	-0.438453	5.5703	0.56387	-0.53902	5.5703	0.466121	ENSG00000065054
ENSG00000065057	-1.59944	4.72622	0.0052404	-1.89709	4.72622	0.000784777	-0.387646	4.72622	0.616964	-1.09665	4.72622	0.0889007	ENSG00000065057
ENSG00000065060	0.616832	4.92807	0.383573	1.26996	4.92807	0.00669039	0.142495	4.92807	0.856466	0.141376	4.92807	0.858052	ENSG00000065060
ENSG00000065135	0.165604	6.70167	0.835615	0.452123	6.70167	0.555134	-0.180422	6.70167	0.820408	-0.089887	6.70167	0.912354	ENSG00000065135
ENSG00000065150	0.0608659	6.70699	0.93965	-0.0523572	6.70699	0.94897	0.0186776	6.70699	0.981175	0.570599	6.70699	0.428105	ENSG00000065150
ENSG00000065154	-0.518503	4.60236	0.492206	-0.676337	4.60236	0.35293	0.0561036	4.60236	0.9418	0.358986	4.60236	0.642154	ENSG00000065154
ENSG00000065183	0.316951	5.15236	0.682084	0.0832948	5.15236	0.917094	-0.163596	5.15236	0.836882	-0.323318	5.15236	0.676993	ENSG00000065183
ENSG00000065243	-0.0146581	7.1303	0.986228	0.102339	7.1303	0.898307	-0.0931379	7.1303	0.908577	-0.126127	7.1303	0.875233	ENSG00000065243
ENSG00000065268	-0.707114	5.91095	0.305028	-0.687377	5.91095	0.323149	-0.684497	5.91095	0.325227	-0.959984	5.91095	0.116617	ENSG00000065268
ENSG00000065308	0.121933	7.38818	0.877486	0.0349716	7.38818	0.96446	-0.217516	7.38818	0.782872	-1.16296	7.38818	0.0143689	ENSG00000065308
ENSG00000065328	-0.176503	5.61739	0.823973	-0.591241	5.61739	0.409392	-0.259308	5.61739	0.741257	-0.152812	5.61739	0.847763	ENSG00000065328
ENSG00000065357	-0.00546841	5.20929	0.995641	-0.270195	5.20929	0.730634	0.266356	5.20929	0.732265	-0.545913	5.20929	0.456491	ENSG00000065357
ENSG00000065413	-0.795997	2.75911	0.256086	-0.709089	2.75911	0.324307	-0.135385	2.75911	0.86513	-0.395854	2.75911	0.607183	ENSG00000065413
ENSG00000065427	0.310228	7.65248	0.688867	0.643348	7.65248	0.355871	-0.283203	7.65248	0.717496	-0.282647	7.65248	0.718042	ENSG00000065427
ENSG00000065457	0.231884	5.25962	0.766987	0.104561	5.25962	0.895364	-0.0596291	5.25962	0.941351	0.00751732	5.25962	0.992123	ENSG00000065457
ENSG00000065485	0.463239	4.89411	0.536485	0.791115	4.89411	0.221436	0.521319	4.89411	0.477567	0.0154512	4.89411	0.984363	ENSG00000065485
ENSG00000065491	-0.0960841	3.703	0.90422	-0.114336	3.703	0.885783	-0.212426	3.703	0.787799	0.361678	3.703	0.637453	ENSG00000065491
ENSG00000065518	-0.164238	6.67283	0.83624	-0.264284	6.67283	0.736239	0.348131	6.67283	0.652006	0.157505	6.67283	0.842017	ENSG00000065518
ENSG00000065526	0.00685243	7.21162	0.992386	-0.0103795	7.21162	0.990522	-0.485262	7.21162	0.51571	-0.168294	7.21162	0.832192	ENSG00000065526
ENSG00000065534	1.34936	7.84047	0.00140734	1.79968	7.84047	5.13e-07	0.41599	7.84047	0.58353	-0.92558	7.84047	0.115404	ENSG00000065534
ENSG00000065548	0.241977	8.66846	0.756689	0.163579	8.66846	0.835507	-0.217563	8.66846	0.782915	0.433891	8.66846	0.567262	ENSG00000065548
ENSG00000065559	-0.0575832	4.10249	0.942998	-0.2006	4.10249	0.799568	0.081047	4.10249	0.918435	-0.413374	4.10249	0.58647	ENSG00000065559
ENSG00000065600	-0.199345	3.09484	0.800402	-0.137841	3.09484	0.861782	0.670365	3.09484	0.343131	0.242023	3.09484	0.758328	ENSG00000065600
ENSG00000065613	0.58083	8.41471	0.417743	0.468702	8.41471	0.532691	0.00420568	8.41471	0.995229	-0.272011	8.41471	0.728667	ENSG00000065613
ENSG00000065615	0.209884	3.93011	0.789021	0.335252	3.93011	0.66369	0.248832	3.93011	0.749868	0.199388	3.93011	0.799862	ENSG00000065615
ENSG00000065618	2.24072	2.16515	0.000710624	3.54111	2.16515	1.62e-08	0.891803	2.16515	0.257783	3.58555	2.16515	1.9e-08	ENSG00000065618
ENSG00000065621	-0.475561	2.36229	0.538865	0.327034	2.36229	0.677563	0.339414	2.36229	0.661632	3.48424	2.36229	7.64e-12	ENSG00000065621
ENSG00000065717	-1.36704	3.25772	0.0193859	-1.99031	3.25772	0.000448041	0.884675	3.25772	0.167454	-0.63278	3.25772	0.383605	ENSG00000065717
ENSG00000065802	-0.646264	5.17399	0.363315	-0.598053	5.17399	0.408646	-0.717208	5.17399	0.298785	1.80083	5.17399	3.51e-05	ENSG00000065802
ENSG00000065809	0.455908	7.14003	0.554586	0.669661	7.14003	0.333647	-0.161569	7.14003	0.842177	-0.0610944	7.14003	0.940117	ENSG00000065809
ENSG00000065833	0.0477467	3.80513	0.951675	0.111265	3.80513	0.888075	0.250253	3.80513	0.748322	-0.19428	3.80513	0.80478	ENSG00000065833
ENSG00000065882	-0.237686	6.20993	0.762743	0.267114	6.20993	0.731789	-0.0502747	6.20993	0.950905	-0.116326	6.20993	0.88471	ENSG00000065882
ENSG00000065883	0.185894	5.28287	0.813027	0.299904	5.28287	0.699141	0.127044	5.28287	0.872336	0.642819	5.28287	0.357684	ENSG00000065883
ENSG00000065911	-0.473816	6.31676	0.527047	0.0599919	6.31676	0.939203	0.0534554	6.31676	0.945715	-0.0868622	6.31676	0.913877	ENSG00000065911
ENSG00000065923	-0.509224	3.49497	0.492059	-0.374025	3.49497	0.625966	-0.256894	3.49497	0.74341	-1.21219	3.49497	0.0374347	ENSG00000065923
ENSG00000065970	-0.568996	5.06612	0.432131	-0.72934	5.06612	0.279051	-0.180242	5.06612	0.820334	0.34981	5.06612	0.649341	ENSG00000065970
ENSG00000065978	0.371134	9.28897	0.629624	0.408928	9.28897	0.592643	-0.00610775	9.28897	0.994894	0.529841	9.28897	0.469013	ENSG00000065978
ENSG00000065989	-1.30572	3.81902	0.0124332	-1.78442	3.81902	0.000197775	-0.395238	3.81902	0.605372	-0.479506	3.81902	0.521506	ENSG00000065989
ENSG00000066027	-0.422795	4.7684	0.578397	-0.890993	4.7684	0.147631	-0.104536	4.7684	0.89618	-0.477619	4.7684	0.522643	ENSG00000066027
ENSG00000066044	-0.258949	6.18184	0.741573	-0.0230787	6.18184	0.977811	0.231185	6.18184	0.767561	-0.394949	6.18184	0.606185	ENSG00000066044
ENSG00000066056	0.277815	5.59069	0.721048	0.339927	5.59069	0.659212	0.617087	5.59069	0.382581	0.526516	5.59069	0.472711	ENSG00000066056
ENSG00000066084	0.663469	4.87561	0.338162	1.0811	4.87561	0.041471	-0.0281689	4.87561	0.972471	-0.014892	4.87561	0.985369	ENSG00000066084
ENSG00000066117	0.0763627	4.93823	0.923244	0.315495	4.93823	0.683646	-0.0147511	4.93823	0.98606	-0.919323	4.93823	0.131008	ENSG00000066117
ENSG00000066135	0.0351548	4.73294	0.964333	0.0824877	4.73294	0.916985	-0.193056	4.73294	0.80741	-1.11104	4.73294	0.0452971	ENSG00000066135
ENSG00000066136	0.219423	3.41852	0.779429	0.0656253	3.41852	0.933902	-0.0550146	3.41852	0.945444	0.405651	3.41852	0.593994	ENSG00000066136
ENSG00000066279	-0.0422314	8.29513	0.958844	-0.346036	8.29513	0.65536	0.140209	8.29513	0.858834	-1.24758	8.29513	0.00487281	ENSG00000066279
ENSG00000066322	-0.0132054	7.10541	0.988242	0.0121663	7.10541	0.986377	-0.619661	7.10541	0.384434	-0.171023	7.10541	0.830254	ENSG00000066322
ENSG00000066379	-0.0500988	4.0946	0.950533	-0.331272	4.0946	0.6688	0.213937	4.0946	0.784743	0.298859	4.0946	0.700188	ENSG00000066379
ENSG00000066422	0.176935	5.51339	0.821966	-0.0624025	5.51339	0.938289	-0.415003	5.51339	0.586115	0.672307	5.51339	0.328671	ENSG00000066422
ENSG00000066427	0.120386	6.06563	0.879944	-0.0309902	6.06563	0.969906	-0.0614451	6.06563	0.939857	0.370744	6.06563	0.630612	ENSG00000066427
ENSG00000066455	-0.00757566	5.14549	0.993127	0.0538381	5.14549	0.945456	-0.0956724	5.14549	0.90493	0.847957	5.14549	0.17257	ENSG00000066455
ENSG00000066557	-0.453762	4.71863	0.546726	-0.391318	4.71863	0.609234	-0.17867	4.71863	0.821888	-0.304931	4.71863	0.695393	ENSG00000066557
ENSG00000066583	-0.243676	3.00418	0.756521	-0.07163	3.00418	0.928392	-0.131888	3.00418	0.868584	-0.0707104	3.00418	0.928499	ENSG00000066583
ENSG00000066629	0.741026	3.34994	0.274335	0.693164	3.34994	0.317032	0.241726	3.34994	0.756846	-0.772035	3.34994	0.264518	ENSG00000066629
ENSG00000066651	0.251142	3.85182	0.747684	0.165481	3.85182	0.833607	-0.248563	3.85182	0.751454	-0.551386	3.85182	0.451523	ENSG00000066651
ENSG00000066654	0.128611	5.70309	0.872113	-0.108518	5.70309	0.893049	-0.0531278	5.70309	0.948173	-0.4607	5.70309	0.541719	ENSG00000066654
ENSG00000066697	0.273488	5.65142	0.725485	0.726858	5.65142	0.276664	0.0176198	5.65142	0.982223	1.36851	5.65142	0.000987496	ENSG00000066697
ENSG00000066739	-0.469836	4.14973	0.530524	-0.612474	4.14973	0.390599	-0.145756	4.14973	0.854829	-0.449786	4.14973	0.550374	ENSG00000066739
ENSG00000066777	0.132736	5.96871	0.866759	0.208065	5.96871	0.790792	0.162622	5.96871	0.836496	-0.617737	5.96871	0.38326	ENSG00000066777
ENSG00000066827	0.062659	2.92123	0.936643	-0.194425	2.92123	0.805042	-0.164687	2.92123	0.835399	-0.938781	2.92123	0.163791	ENSG00000066827
ENSG00000066855	0.0574112	3.7534	0.941681	-0.117013	3.7534	0.883256	0.109674	3.7534	0.889082	-0.405998	3.7534	0.59427	ENSG00000066855
ENSG00000066926	-0.883336	3.32868	0.172374	-0.610095	3.32868	0.396232	-0.337028	3.32868	0.663188	-0.870551	3.32868	0.187683	ENSG00000066926
ENSG00000066933	-0.227559	5.52442	0.772925	-0.443823	5.52442	0.557505	-0.768546	5.52442	0.239453	-1.48584	5.52442	0.000456897	ENSG00000066933
ENSG00000067057	-0.60837	7.03976	0.392816	-0.428398	7.03976	0.573044	-0.475778	7.03976	0.525408	-0.631817	7.03976	0.369926	ENSG00000067057
ENSG00000067064	1.18137	6.06003	0.0461461	0.791464	6.06003	0.24914	0.384339	6.06003	0.615737	0.255517	6.06003	0.74376	ENSG00000067064
ENSG00000067066	0.964781	8.81231	0.0839618	1.33136	8.81231	0.00145865	0.0453117	8.81231	0.953761	1.07293	8.81231	0.0351458	ENSG00000067066
ENSG00000067082	0.238856	9.06777	0.759813	1.19264	9.06777	0.00858714	-0.51895	9.06777	0.481725	0.912314	9.06777	0.116559	ENSG00000067082
ENSG00000067167	-0.374233	7.51728	0.627246	-0.19507	7.51728	0.805571	0.236403	7.51728	0.762175	0.0268879	7.51728	0.972128	ENSG00000067167
ENSG00000067177	-0.902143	2.28535	0.198883	-0.738792	2.28535	0.310144	0.157915	2.28535	0.840712	1.40864	2.28535	0.012105	ENSG00000067177
ENSG00000067182	-0.350383	7.51837	0.651087	-0.435727	7.51837	0.566269	0.12584	7.51837	0.873538	-2.27802	7.51837	8.89e-11	ENSG00000067182
ENSG00000067191	0.636325	2.07289	0.388043	0.719337	2.07289	0.320989	0.383824	2.07289	0.618867	-0.551356	2.07289	0.481714	ENSG00000067191
ENSG00000067208	-0.0949747	5.52081	0.905745	-0.154653	5.52081	0.845805	-0.0108896	5.52081	0.989949	-1.03842	5.52081	0.0600515	ENSG00000067208
ENSG00000067221	0.531825	4.98143	0.467324	1.30579	4.98143	0.00447978	-0.15957	4.98143	0.840504	2.25138	4.98143	6.14e-11	ENSG00000067221
ENSG00000067225	0.458769	9.81938	0.540222	0.519417	9.81938	0.479995	0.0523921	9.81938	0.945947	-0.0346572	9.81938	0.966942	ENSG00000067225
ENSG00000067248	-0.00447701	5.99737	0.996332	-0.0928239	5.99737	0.907951	0.105717	5.99737	0.893749	0.181588	5.99737	0.817363	ENSG00000067248
ENSG00000067334	0.511602	7.37904	0.487414	0.549975	7.37904	0.448717	0.287365	7.37904	0.711544	0.96551	7.37904	0.0818152	ENSG00000067334
ENSG00000067365	-0.138974	2.70208	0.860827	-0.296592	2.70208	0.703268	0.0382649	2.70208	0.960709	0.383118	2.70208	0.618097	ENSG00000067365
ENSG00000067369	0.454089	5.93592	0.546508	0.611306	5.93592	0.387852	-0.199543	5.93592	0.800848	0.199277	5.93592	0.7997	ENSG00000067369
ENSG00000067533	0.455042	6.91137	0.545379	0.364363	6.91137	0.635759	-0.00170522	6.91137	0.999163	0.591498	6.91137	0.407229	ENSG00000067533
ENSG00000067560	-0.0797602	9.40216	0.921376	0.0300678	9.40216	0.969145	-0.257042	9.40216	0.743633	0.224863	9.40216	0.773796	ENSG00000067560
ENSG00000067596	0.310639	5.29596	0.688401	0.244691	5.29596	0.75425	0.119213	5.29596	0.880284	-0.140652	5.29596	0.859653	ENSG00000067596
ENSG00000067704	-0.16068	5.49735	0.839762	0.0550205	5.49735	0.94504	-0.10777	5.49735	0.893304	-0.183816	5.49735	0.816511	ENSG00000067704
ENSG00000067715	0.180333	1.66156	0.833238	0.571308	1.66156	0.483592	-0.432893	1.66156	0.598754	4.74902	1.66156	1.05e-14	ENSG00000067715
ENSG00000067798	3.4302	3.75489	4.52e-11	4.3693	3.75489	2.67e-15	0.40717	3.75489	0.60234	3.3941	3.75489	1.59e-10	ENSG00000067798
ENSG00000067829	0.109409	3.55693	0.889707	0.0229473	3.55693	0.976618	0.322794	3.55693	0.675733	-0.0245709	3.55693	0.97528	ENSG00000067829
ENSG00000067836	-1.21199	3.16979	0.0382752	-1.4843	3.16979	0.00767434	-0.435089	3.16979	0.566334	-0.863074	3.16979	0.197489	ENSG00000067836
ENSG00000067900	0.167916	8.50388	0.831414	0.183488	8.50388	0.815391	-0.00803447	8.50388	0.992936	0.145388	8.50388	0.854459	ENSG00000067900
ENSG00000067955	0.0936109	6.03602	0.907714	-0.108923	6.03602	0.893215	0.0611662	6.03602	0.939598	-0.112593	6.03602	0.889386	ENSG00000067955
ENSG00000068001	-0.152057	5.58687	0.848934	-0.318311	5.58687	0.682674	0.875723	5.58687	0.160591	0.58433	5.58687	0.417319	ENSG00000068001
ENSG00000068024	-0.479477	3.03866	0.522371	-0.71673	3.03866	0.30707	-0.0772796	3.03866	0.923311	-0.927945	3.03866	0.165523	ENSG00000068024
ENSG00000068028	-0.410553	6.63573	0.595637	-0.400538	6.63573	0.605442	-0.470079	6.63573	0.537991	0.495649	6.63573	0.508776	ENSG00000068028
ENSG00000068079	1.70418	7.08304	0.000532712	2.13264	7.08304	4.28e-06	-0.12135	7.08304	0.880869	-1.26277	7.08304	0.0388697	ENSG00000068079
ENSG00000068097	-0.11018	4.46655	0.890472	-0.0840833	4.46655	0.916647	-0.476178	4.46655	0.5243	-1.42425	4.46655	0.00391078	ENSG00000068097
ENSG00000068120	-0.16245	4.67865	0.83791	0.190649	4.67865	0.808304	0.181811	4.67865	0.817033	0.281402	4.67865	0.717665	ENSG00000068120
ENSG00000068137	-0.632084	4.87974	0.36989	-0.960324	4.87974	0.101869	0.644438	4.87974	0.355786	-0.907383	4.87974	0.137394	ENSG00000068137
ENSG00000068305	0.214552	6.50873	0.784219	0.168156	6.50873	0.832093	-0.210496	6.50873	0.78988	0.492819	6.50873	0.507757	ENSG00000068305
ENSG00000068308	-0.275649	6.65037	0.725359	-0.101595	6.65037	0.89943	-0.394292	6.65037	0.607113	-0.303371	6.65037	0.697692	ENSG00000068308
ENSG00000068323	0.0229146	6.30521	0.975716	-0.0254013	6.30521	0.975892	0.0129255	6.30521	0.985682	0.747414	6.30521	0.263843	ENSG00000068323
ENSG00000068354	-0.5154	3.92039	0.485469	-0.282708	3.92039	0.717455	-0.288319	3.92039	0.71207	-1.42474	3.92039	0.00652315	ENSG00000068354
ENSG00000068366	0.708403	7.05639	0.292965	0.890895	7.05639	0.132235	0.579969	7.05639	0.418609	-0.0404043	7.05639	0.960546	ENSG00000068366
ENSG00000068394	0.0793421	4.92684	0.920157	0.159004	4.92684	0.840097	0.0583029	4.92684	0.941199	-0.583122	4.92684	0.41807	ENSG00000068394
ENSG00000068400	0.326977	7.35547	0.671378	0.647609	7.35547	0.358753	-0.119923	7.35547	0.882021	-0.568112	7.35547	0.437663	ENSG00000068400
ENSG00000068438	0.291619	4.09848	0.70724	0.236287	4.09848	0.762653	0.670333	4.09848	0.333056	-0.229773	4.09848	0.769701	ENSG00000068438
ENSG00000068489	0.0517868	7.56303	0.948395	0.0833957	7.56303	0.917065	-0.192138	7.56303	0.808292	-1.42132	7.56303	0.000310039	ENSG00000068489
ENSG00000068650	0.0562406	5.26104	0.943369	-0.344384	5.26104	0.656389	-0.198478	5.26104	0.802017	-1.25071	5.26104	0.0106219	ENSG00000068650
ENSG00000068654	0.0958621	4.76309	0.903434	0.0697443	4.76309	0.929627	-0.264527	4.76309	0.736003	-1.53841	4.76309	0.000815586	ENSG00000068654
ENSG00000068697	-0.153122	10.5439	0.847639	0.0891094	10.5439	0.910494	0.0505402	10.5439	0.948983	0.112003	10.5439	0.88752	ENSG00000068697
ENSG00000068724	-1.09248	3.95611	0.0528773	-1.26431	3.95611	0.0162337	-0.221733	3.95611	0.778877	-1.09724	3.95611	0.056628	ENSG00000068724
ENSG00000068745	0.0556051	5.85422	0.944912	-0.0786828	5.85422	0.922836	-0.106873	5.85422	0.8949	1.34654	5.85422	0.00115248	ENSG00000068745
ENSG00000068784	0.254839	5.17165	0.744073	0.0800218	5.17165	0.919559	-0.221134	5.17165	0.779295	-0.0535398	5.17165	0.946981	ENSG00000068784
ENSG00000068796	-0.155701	6.06408	0.844797	-0.186584	6.06408	0.813839	0.243223	6.06408	0.755551	-0.619448	6.06408	0.381489	ENSG00000068796
ENSG00000068878	0.148294	6.27949	0.850853	0.263162	6.27949	0.735709	-0.188872	6.27949	0.811549	-0.534659	6.27949	0.465714	ENSG00000068878
ENSG00000068885	-0.220261	3.79293	0.77998	-0.543594	3.79293	0.460386	0.469267	3.79293	0.530109	-0.0938064	3.79293	0.906261	ENSG00000068885
ENSG00000068903	-0.548131	4.84812	0.452459	-0.943499	4.84812	0.112528	0.151431	4.84812	0.847487	0.220064	4.84812	0.778926	ENSG00000068903
ENSG00000068912	0.17577	6.35929	0.823102	0.509317	6.35929	0.489731	-0.0789645	6.35929	0.921917	-0.769778	6.35929	0.23859	ENSG00000068912
ENSG00000068976	0.0552036	1.00205	0.974599	1.0929	1.00205	0.371084	0.234216	1.00205	0.854441	6.6418	1.00205	2.46e-13	ENSG00000068976
ENSG00000069020	1.05947	5.7178	0.0425796	1.16754	5.7178	0.0149264	0.572473	5.7178	0.426374	0.343681	5.7178	0.656151	ENSG00000069020
ENSG00000069122	1.04175	4.8684	0.0566495	0.405784	4.8684	0.594033	0.617881	4.8684	0.38211	0.310899	4.8684	0.688406	ENSG00000069122
ENSG00000069248	-0.150976	5.40398	0.849498	-0.32561	5.40398	0.674984	0.170776	5.40398	0.828139	-0.657179	5.40398	0.345421	ENSG00000069248
ENSG00000069275	-0.356467	10.7462	0.645159	-0.501201	10.7462	0.499783	-0.249507	10.7462	0.75125	-1.04778	10.7462	0.0448559	ENSG00000069275
ENSG00000069329	-0.107294	7.2632	0.894326	0.0083886	7.2632	0.99121	-0.0887634	7.2632	0.912908	-0.487687	7.2632	0.5134	ENSG00000069329
ENSG00000069345	0.42585	6.39677	0.578037	0.576429	6.39677	0.422317	-0.0986324	6.39677	0.903033	0.863171	6.39677	0.155257	ENSG00000069345
ENSG00000069399	1.28736	7.07555	0.00236167	1.64359	7.07555	8.19e-07	1.5084	7.07555	2.75e-05	2.51335	7.07555	2.96e-17	ENSG00000069399
ENSG00000069424	-0.169899	1.97393	0.830697	-0.906182	1.97393	0.218165	0.605165	1.97393	0.412313	-0.00582532	1.97393	0.992107	ENSG00000069424
ENSG00000069493	0.0848008	3.55946	0.915526	1.76172	3.55946	0.00015949	0.382531	3.55946	0.616328	3.996	3.55946	5.46e-17	ENSG00000069493
ENSG00000069509	0.0536466	6.22445	0.946419	0.0957772	6.22445	0.904418	-0.128442	6.22445	0.872523	1.11658	6.22445	0.0230802	ENSG00000069509
ENSG00000069667	0.251022	3.08008	0.748729	-0.496455	3.08008	0.512995	0.109687	3.08008	0.889115	1.20022	3.08008	0.045959	ENSG00000069667
ENSG00000069702	-0.268773	6.81471	0.731785	-0.42131	6.81471	0.585115	0.14564	6.81471	0.85544	-2.61258	6.81471	7.57e-16	ENSG00000069702
ENSG00000069849	0.183137	8.77209	0.81541	-0.115232	8.77209	0.885925	0.440926	8.77209	0.558257	-0.408312	8.77209	0.593303	ENSG00000069849
ENSG00000069869	0.626165	6.85995	0.372858	0.880389	6.85995	0.14063	0.460648	6.85995	0.540377	0.86595	6.85995	0.152407	ENSG00000069869
ENSG00000069956	0.664718	5.71833	0.335736	1.00307	5.71833	0.0668335	0.0175875	5.71833	0.981961	0.940216	5.71833	0.103475	ENSG00000069956
ENSG00000069966	-0.426682	4.80119	0.574516	-1.21958	4.80119	0.0161185	-0.0992313	4.80119	0.901533	-0.140414	4.80119	0.859988	ENSG00000069966
ENSG00000069974	-0.513095	6.17378	0.487397	-0.502181	6.17378	0.498374	0.3543	6.17378	0.646303	-0.663256	6.17378	0.338583	ENSG00000069974
ENSG00000069998	-0.470818	3.62016	0.534114	-0.704131	3.62016	0.324474	0.0258854	3.62016	0.972668	-0.53519	3.62016	0.475063	ENSG00000069998
ENSG00000070010	-0.0891095	7.02168	0.912508	-0.186335	7.02168	0.814078	0.240582	7.02168	0.758108	0.0424913	7.02168	0.957618	ENSG00000070010
ENSG00000070018	-0.201443	4.27637	0.798958	-0.397035	4.27637	0.603185	0.00970061	4.27637	0.989498	-2.01367	4.27637	9.56e-06	ENSG00000070018
ENSG00000070047	-0.171687	5.98399	0.828792	-0.0647037	5.98399	0.936311	-0.325742	5.98399	0.675184	-1.01698	5.98399	0.0636982	ENSG00000070047
ENSG00000070061	-0.468435	3.99912	0.531904	-0.757212	3.99912	0.260077	-0.237852	3.99912	0.762566	-0.330993	3.99912	0.668851	ENSG00000070061
ENSG00000070081	0.334582	8.08723	0.664794	0.583742	8.08723	0.414846	0.418027	8.08723	0.585182	0.548649	8.08723	0.450065	ENSG00000070081
ENSG00000070087	-0.233087	1.78595	0.766212	-1.85699	1.78595	0.00682629	0.127662	1.78595	0.871122	-0.382215	1.78595	0.623148	ENSG00000070087
ENSG00000070214	-1.04119	7.5728	0.0458868	-0.849771	7.5728	0.165946	0.033475	7.5728	0.966586	-0.426281	7.5728	0.578652	ENSG00000070214
ENSG00000070269	-0.0388686	3.86791	0.961584	-0.1082	3.86791	0.89191	-0.0650341	3.86791	0.935571	0.259649	3.86791	0.739506	ENSG00000070269
ENSG00000070366	0.514507	3.37236	0.48625	0.360828	3.37236	0.638344	-0.432199	3.37236	0.568196	-0.94883	3.37236	0.151202	ENSG00000070366
ENSG00000070367	0.0496903	6.07627	0.949208	0.152272	6.07627	0.846493	0.00656085	6.07627	0.992334	0.0344892	6.07627	0.964516	ENSG00000070367
ENSG00000070371	-0.260016	1.94503	0.739281	-0.75443	1.94503	0.308693	0.295791	1.94503	0.703496	0.300417	1.94503	0.702897	ENSG00000070371
ENSG00000070404	-0.730832	3.20415	0.289774	-0.651773	3.20415	0.359323	-1.06155	3.20415	0.0777553	-0.128736	3.20415	0.870997	ENSG00000070404
ENSG00000070413	-0.394807	5.08926	0.606159	-0.421144	5.08926	0.579722	-0.179448	5.08926	0.821092	-1.45188	5.08926	0.00118428	ENSG00000070413
ENSG00000070423	-0.390904	5.73026	0.611097	-0.473061	5.73026	0.529713	-0.161395	5.73026	0.840208	-0.824406	5.73026	0.212687	ENSG00000070423
ENSG00000070444	0.220432	4.03904	0.778457	0.365125	4.03904	0.633929	0.436453	4.03904	0.562441	-0.102321	4.03904	0.897508	ENSG00000070444
ENSG00000070476	-0.34335	4.21083	0.657003	-0.203725	4.21083	0.796583	-0.213264	4.21083	0.787193	-1.09001	4.21083	0.0611532	ENSG00000070476
ENSG00000070495	0.047262	5.34826	0.952327	-0.198668	5.34826	0.801638	0.138579	5.34826	0.860706	1.99983	5.34826	6.42e-10	ENSG00000070495
ENSG00000070501	0.00586565	4.64276	0.99363	-0.24501	4.64276	0.755155	0.0909054	4.64276	0.908465	0.853204	4.64276	0.172324	ENSG00000070501
ENSG00000070526	0.0450853	1.99167	0.954385	-1.32911	1.99167	0.0443469	-0.834388	1.99167	0.231414	-1.18377	1.99167	0.0880832	ENSG00000070526
ENSG00000070540	0.613031	3.28292	0.392303	0.673849	3.28292	0.337195	0.591059	3.28292	0.411934	-0.909699	3.28292	0.183338	ENSG00000070540
ENSG00000070610	0.524948	3.20526	0.475974	0.537787	3.20526	0.463925	0.372919	3.20526	0.625526	-0.244252	3.20526	0.754376	ENSG00000070610
ENSG00000070614	-0.630489	6.728	0.378288	-0.708585	6.728	0.307189	-0.534073	6.728	0.470469	-2.67265	6.728	3.88e-08	ENSG00000070614
ENSG00000070669	-0.098375	4.91998	0.902469	0.302958	4.91998	0.695981	-0.86443	4.91998	0.187522	0.625364	4.91998	0.38177	ENSG00000070669
ENSG00000070718	-0.337957	5.0574	0.662734	-0.4742	5.0574	0.526333	-0.177437	5.0574	0.82308	-1.19349	5.0574	0.0197142	ENSG00000070718
ENSG00000070731	-0.917865	2.86393	0.203816	-1.03476	2.86393	0.149663	-0.0768614	2.86393	0.924856	-0.100713	2.86393	0.900174	ENSG00000070731
ENSG00000070756	-0.0796551	10.8276	0.921508	-0.0488748	10.8276	0.952269	0.416998	10.8276	0.583346	0.638843	10.8276	0.360537	ENSG00000070756
ENSG00000070759	0.352707	2.34795	0.652738	0.696339	2.34795	0.343684	0.511142	2.34795	0.500092	1.30562	2.34795	0.040141	ENSG00000070759
ENSG00000070761	-0.46752	4.18789	0.533609	-0.54002	4.18789	0.462779	-0.0185846	4.18789	0.982387	1.0932	4.18789	0.0506298	ENSG00000070761
ENSG00000070770	-0.0416333	7.08247	0.959548	-0.00021463	7.08247	1.00065	0.0198907	7.08247	0.979921	0.705579	7.08247	0.296414	ENSG00000070770
ENSG00000070778	-0.330784	4.07195	0.669222	-0.176677	4.07195	0.823487	-0.557963	4.07195	0.443302	0.951628	4.07195	0.110409	ENSG00000070778
ENSG00000070785	-0.0987261	4.80957	0.901904	-0.336928	4.80957	0.66354	-0.168691	4.80957	0.831848	-0.465897	4.80957	0.534421	ENSG00000070785
ENSG00000070814	0.213418	7.35538	0.785275	0.0423336	7.35538	0.956957	0.0927715	7.35538	0.906545	-1.07776	7.35538	0.0346584	ENSG00000070814
ENSG00000070831	0.153124	7.04615	0.845586	0.384235	7.04615	0.614987	0.16551	7.04615	0.833154	-1.0165	7.04615	0.0685977	ENSG00000070831
ENSG00000070882	0.124132	4.81644	0.87624	0.0620058	4.81644	0.9384	-0.310595	4.81644	0.68984	-0.48005	4.81644	0.520184	ENSG00000070882
ENSG00000070950	0.436181	5.38538	0.563815	-0.0375941	5.38538	0.963051	0.247626	5.38538	0.751215	-0.0916262	5.38538	0.9088	ENSG00000070950
ENSG00000070961	0.406179	5.72557	0.595221	0.993044	5.72557	0.0721565	-0.00160748	5.72557	0.999151	1.97339	5.72557	1.07e-10	ENSG00000070961
ENSG00000071051	-0.518095	2.58915	0.506818	-0.158869	2.58915	0.843269	0.516159	2.58915	0.497745	-1.02315	2.58915	0.184974	ENSG00000071051
ENSG00000071054	0.238006	8.4149	0.76066	0.825267	8.4149	0.185365	-0.594433	8.4149	0.405967	0.387982	8.4149	0.615603	ENSG00000071054
ENSG00000071073	-0.447072	4.30416	0.55286	0.126037	4.30416	0.873117	0.627838	4.30416	0.373112	0.131797	4.30416	0.867525	ENSG00000071073
ENSG00000071082	0.0983494	9.87759	0.901137	0.172367	9.87759	0.82649	0.596824	9.87759	0.401911	0.857589	9.87759	0.158987	ENSG00000071082
ENSG00000071127	-0.143489	7.38427	0.857461	0.0334394	7.38427	0.966439	-0.124727	7.38427	0.876588	-0.387441	7.38427	0.615612	ENSG00000071127
ENSG00000071189	0.176326	4.58323	0.822581	0.0716131	4.58323	0.927537	0.429455	4.58323	0.569524	-0.594251	4.58323	0.408576	ENSG00000071189
ENSG00000071205	-0.506842	6.28087	0.493708	-0.529133	6.28087	0.471275	-0.481921	6.28087	0.51895	0.277285	6.28087	0.721672	ENSG00000071205
ENSG00000071242	-1.23376	6.69246	0.00823327	-1.82372	6.69246	1.97e-06	-0.280947	6.69246	0.719886	-0.80894	6.69246	0.204676	ENSG00000071242
ENSG00000071243	0.0216894	5.52782	0.978262	0.0182614	5.52782	0.981647	-0.0813561	5.52782	0.920095	1.46107	5.52782	0.000177821	ENSG00000071243
ENSG00000071462	0.117785	6.28776	0.881911	0.126616	6.28776	0.872996	-0.126593	6.28776	0.874238	0.275793	6.28776	0.723176	ENSG00000071462
ENSG00000071537	0.262745	6.64439	0.736084	0.336077	6.64439	0.663369	0.0624647	6.64439	0.937969	-0.752986	6.64439	0.253166	ENSG00000071537
ENSG00000071539	-0.297018	5.27114	0.703622	-0.523266	5.27114	0.477411	-0.397386	5.27114	0.6036	-0.501478	5.27114	0.499153	ENSG00000071539
ENSG00000071553	-0.199511	7.18307	0.801117	-0.0653116	7.18307	0.935709	-0.202019	7.18307	0.798607	0.422548	7.18307	0.576983	ENSG00000071553
ENSG00000071564	-0.893086	6.39471	0.136209	-1.2341	6.39471	0.0084995	-0.0365957	6.39471	0.964436	-0.572718	6.39471	0.428057	ENSG00000071564
ENSG00000071575	-0.823377	4.18991	0.203744	-1.02851	4.18991	0.0796449	0.670047	4.18991	0.33262	-0.350331	4.18991	0.649581	ENSG00000071575
ENSG00000071626	0.0812854	7.6162	0.918749	0.082141	7.6162	0.91789	-0.405524	7.6162	0.59759	-0.368174	7.6162	0.633996	ENSG00000071626
ENSG00000071655	-0.803344	5.91903	0.24282	-1.1366	5.91903	0.0652535	-1.31048	5.91903	0.0243043	-1.23378	5.91903	0.0413113	ENSG00000071655
ENSG00000071794	-0.537187	5.83403	0.463214	-0.985616	5.83403	0.0783701	0.160378	5.83403	0.838596	-0.659138	5.83403	0.342817	ENSG00000071794
ENSG00000071859	-0.195056	6.77405	0.805342	-0.394167	6.77405	0.607877	-0.158899	6.77405	0.84163	-0.407547	6.77405	0.59444	ENSG00000071859
ENSG00000071889	-0.545456	3.2961	0.457377	-1.08317	3.2961	0.0748665	-0.179455	3.2961	0.820923	-0.433672	3.2961	0.566788	ENSG00000071889
ENSG00000071894	0.00174764	3.15696	0.997801	-0.165347	3.15696	0.834339	0.0251443	3.15696	0.974063	-0.653645	3.15696	0.363011	ENSG00000071894
ENSG00000071967	-0.124549	5.65321	0.876575	-0.55427	5.65321	0.44894	0.174678	5.65321	0.823787	0.185149	5.65321	0.813537	ENSG00000071967
ENSG00000071994	-0.181195	5.72079	0.819253	0.0419737	5.72079	0.957693	0.0896206	5.72079	0.91015	-0.37836	5.72079	0.622938	ENSG00000071994
ENSG00000072041	-0.677878	2.63309	0.35935	-0.772662	2.63309	0.291327	0.906897	2.63309	0.173021	-0.717316	2.63309	0.339194	ENSG00000072041
ENSG00000072042	0.269725	7.02937	0.729107	0.170947	7.02937	0.827979	0.32255	7.02937	0.676655	-0.490379	7.02937	0.510294	ENSG00000072042
ENSG00000072062	-0.659873	7.16965	0.343741	-1.05446	7.16965	0.0518563	-0.262167	7.16965	0.738924	-0.315043	7.16965	0.686231	ENSG00000072062
ENSG00000072071	-0.383847	4.24315	0.616982	-0.159678	4.24315	0.840927	0.856375	4.24315	0.177872	-0.124482	4.24315	0.875997	ENSG00000072071
ENSG00000072110	-0.223997	9.73552	0.7766	0.242752	9.73552	0.755777	-0.59339	9.73552	0.407391	-0.924433	9.73552	0.111541	ENSG00000072110
ENSG00000072121	1.0973	5.1824	0.0403224	1.65673	5.1824	5.11e-05	0.0808097	5.1824	0.918207	-0.460598	5.1824	0.53969	ENSG00000072121
ENSG00000072134	-0.748916	6.03474	0.257001	-0.772192	6.03474	0.235682	-0.120963	6.03474	0.879815	-1.23444	6.03474	0.00818585	ENSG00000072134
ENSG00000072135	-0.673368	4.70291	0.330492	-0.944643	4.70291	0.112063	-0.547151	4.70291	0.453523	-0.551929	4.70291	0.448931	ENSG00000072135
ENSG00000072163	-1.57746	6.55706	0.000899771	-1.94545	6.55706	1.75e-05	-0.864344	6.55706	0.176052	-1.45558	6.55706	0.00331612	ENSG00000072163
ENSG00000072201	0.321671	1.79826	0.69229	-0.488622	1.79826	0.555021	0.619977	1.79826	0.42332	-0.155151	1.79826	0.850811	ENSG00000072201
ENSG00000072210	-0.585867	6.25091	0.415498	-0.984907	6.25091	0.0842122	0.669377	6.25091	0.331966	-1.24253	6.25091	0.0114784	ENSG00000072210
ENSG00000072274	0.101655	7.84201	0.897957	-1.3931	7.84201	0.000442303	-0.0947985	7.84201	0.906371	-0.595478	7.84201	0.404904	ENSG00000072274
ENSG00000072310	0.133912	4.83798	0.86523	0.73581	4.83798	0.271133	0.927445	4.83798	0.116832	0.306274	4.83798	0.692959	ENSG00000072310
ENSG00000072364	0.26923	6.83091	0.729615	0.355383	6.83091	0.64522	-0.22148	6.83091	0.778889	0.512712	6.83091	0.48633	ENSG00000072364
ENSG00000072401	0.160586	4.18482	0.838437	0.409722	4.18482	0.592316	0.487509	4.18482	0.515898	0.769686	4.18482	0.270485	ENSG00000072401
ENSG00000072415	-0.779061	6.58009	0.228438	-0.927934	6.58009	0.108671	-0.422578	6.58009	0.584754	0.571073	6.58009	0.427606	ENSG00000072415
ENSG00000072422	-0.206787	3.24343	0.793447	-0.876614	3.24343	0.194727	0.140679	3.24343	0.8579	-0.2024	3.24343	0.797288	ENSG00000072422
ENSG00000072501	-0.0484038	9.44015	0.95297	-0.189003	9.44015	0.811575	-0.376049	9.44015	0.62754	-0.345068	9.44015	0.656363	ENSG00000072501
ENSG00000072506	-0.277827	6.11612	0.722782	-0.133467	6.11612	0.867155	-0.128563	6.11612	0.872182	-0.127663	6.11612	0.872951	ENSG00000072506
ENSG00000072518	-0.169207	5.52106	0.831273	-0.077718	5.52106	0.923068	-0.456326	5.52106	0.544777	-0.200529	5.52106	0.799875	ENSG00000072518
ENSG00000072571	-0.0437295	7.19782	0.957315	-0.274491	7.19782	0.726221	0.0567943	7.19782	0.942266	0.42305	7.19782	0.576583	ENSG00000072571
ENSG00000072609	0.255651	3.75213	0.74317	0.148738	3.75213	0.85039	0.0298063	3.75213	0.969509	-0.12423	3.75213	0.875615	ENSG00000072609
ENSG00000072682	-0.20517	3.62948	0.794944	0.0112825	3.62948	0.98819	-0.759352	3.62948	0.259542	-0.719461	3.62948	0.298999	ENSG00000072682
ENSG00000072736	-0.0998019	2.43433	0.899725	-0.389157	2.43433	0.61235	-0.118961	2.43433	0.880892	0.0929549	2.43433	0.9076	ENSG00000072736
ENSG00000072756	0.449709	4.29083	0.549428	0.255087	4.29083	0.743822	0.141374	4.29083	0.857647	0.635863	4.29083	0.366727	ENSG00000072756
ENSG00000072778	0.0979344	6.35766	0.901507	0.0356589	6.35766	0.963739	-0.199397	6.35766	0.801013	-0.866094	6.35766	0.155648	ENSG00000072778
ENSG00000072786	1.1035	5.85124	0.0283878	1.60251	5.85124	6.45e-06	0.0603638	5.85124	0.939188	0.0804309	5.85124	0.91916	ENSG00000072786
ENSG00000072803	-0.268762	5.19391	0.731716	0.0968405	5.19391	0.902561	0.0326291	5.19391	0.966767	0.0105099	5.19391	0.988966	ENSG00000072803
ENSG00000072818	-0.372065	2.61854	0.638156	-0.641245	2.61854	0.41048	0.530209	2.61854	0.485539	2.18725	2.61854	6.93e-05	ENSG00000072818
ENSG00000072840	0.811789	2.62005	0.230944	0.615721	2.62005	0.396201	-0.588804	2.62005	0.423698	-0.616688	2.62005	0.407848	ENSG00000072840
ENSG00000072849	0.318197	6.16563	0.680962	0.487809	6.16563	0.512439	0.0233315	6.16563	0.976512	0.679426	6.16563	0.321295	ENSG00000072849
ENSG00000072864	-0.458421	4.70777	0.542195	-0.648602	4.70777	0.354232	-0.63872	4.70777	0.363432	-1.98593	4.70777	1.13e-06	ENSG00000072864
ENSG00000072954	-1.43236	4.10517	0.00820106	-2.4375	4.10517	3.26e-06	0.220684	4.10517	0.77761	-1.02111	4.10517	0.103318	ENSG00000072954
ENSG00000072958	-0.350454	5.94884	0.65063	-0.403337	5.94884	0.597897	-0.327905	5.94884	0.673038	-1.08061	5.94884	0.0392088	ENSG00000072958
ENSG00000073008	0.0358544	7.73257	0.963795	-0.231927	7.73257	0.768501	-0.167214	7.73257	0.83332	-1.08647	7.73257	0.0310046	ENSG00000073008
ENSG00000073050	0.557672	2.55415	0.449266	-0.0453153	2.55415	0.953664	-0.163449	2.55415	0.835845	0.0792735	2.55415	0.922383	ENSG00000073050
ENSG00000073060	-0.307641	5.25698	0.692966	-0.896685	5.25698	0.138861	0.119541	5.25698	0.879531	-0.117191	5.25698	0.883266	ENSG00000073060
ENSG00000073111	-0.307969	6.54465	0.692835	-0.977604	6.54465	0.0796552	0.33925	6.54465	0.660295	0.909339	6.54465	0.119267	ENSG00000073111
ENSG00000073146	0.180055	2.62608	0.820031	0.74989	2.62608	0.285994	0.583262	2.62608	0.42531	0.257678	2.62608	0.745094	ENSG00000073146
ENSG00000073150	-1.17462	2.29013	0.108381	-0.492942	2.29013	0.529444	0.0599639	2.29013	0.939558	-0.405015	2.29013	0.61104	ENSG00000073150
ENSG00000073169	-0.226064	2.99875	0.773901	-0.50387	2.99875	0.502094	0.482356	2.99875	0.518748	-1.66511	2.99875	0.00825128	ENSG00000073169
ENSG00000073331	-0.103487	4.81712	0.896841	0.517431	4.81712	0.481663	0.294969	4.81712	0.703848	1.15772	4.81712	0.0225732	ENSG00000073331
ENSG00000073350	-0.856925	2.58605	0.206553	-1.57388	2.58605	0.00757405	-0.199565	2.58605	0.800645	-0.0797621	2.58605	0.920017	ENSG00000073350
ENSG00000073417	0.214024	4.17109	0.784742	-0.110623	4.17109	0.889759	-0.00388566	4.17109	0.997102	0.321143	4.17109	0.678196	ENSG00000073417
ENSG00000073464	0.161213	3.09137	0.837908	-0.0618168	3.09137	0.937852	0.475557	3.09137	0.524459	-1.0157	3.09137	0.128766	ENSG00000073464
ENSG00000073536	-0.190085	3.26901	0.810412	-0.363575	3.26901	0.637331	-0.417663	3.26901	0.583834	-1.28194	3.26901	0.0361315	ENSG00000073536
ENSG00000073578	0.140961	5.20878	0.858195	0.18827	5.20878	0.810644	-0.0671184	5.20878	0.933633	-0.927415	5.20878	0.122394	ENSG00000073578
ENSG00000073584	0.0798105	4.81419	0.919875	-0.22581	4.81419	0.77449	0.0168339	4.81419	0.982699	0.37412	4.81419	0.625942	ENSG00000073584
ENSG00000073605	0.0626934	1.91392	0.937459	-0.165189	1.91392	0.833479	0.390583	1.91392	0.609942	0.0491064	1.91392	0.953487	ENSG00000073605
ENSG00000073614	0.106969	7.57222	0.894406	0.153332	7.57222	0.847479	-0.266703	7.57222	0.733871	-0.646575	7.57222	0.35453	ENSG00000073614
ENSG00000073711	0.216652	3.26619	0.78252	0.115074	3.26619	0.884526	0.255422	3.26619	0.743233	0.413467	3.26619	0.588631	ENSG00000073711
ENSG00000073712	0.299252	7.8643	0.699598	0.217484	7.8643	0.781093	-0.714275	7.8643	0.28976	0.6321	7.8643	0.367242	ENSG00000073712
ENSG00000073756	7.20113	1.19547	2.24e-09	8.10237	1.19547	1.44e-11	2.34299	1.19547	0.0792482	5.15526	1.19547	0.000146648	ENSG00000073756
ENSG00000073792	-0.333104	7.16172	0.668023	-0.191648	7.16172	0.808764	0.0239864	7.16172	0.976025	-1.34918	7.16172	0.00123013	ENSG00000073792
ENSG00000073803	-0.472633	6.47705	0.529059	0.159938	6.47705	0.838573	-0.502103	6.47705	0.499734	-0.190119	6.47705	0.811018	ENSG00000073803
ENSG00000073849	-0.613163	1.30135	0.45177	0.0302656	1.30135	0.975488	0.951373	1.30135	0.181423	-2.27154	1.30135	0.0236625	ENSG00000073849
ENSG00000073910	-1.7125	4.80393	0.000661453	-2.62087	4.80393	3.77e-07	0.187634	4.80393	0.810735	0.294638	4.80393	0.704151	ENSG00000073910
ENSG00000073921	0.644327	7.24442	0.354916	0.418815	7.24442	0.582255	0.15952	7.24442	0.839626	0.187723	7.24442	0.811099	ENSG00000073921
ENSG00000073969	-0.0284069	4.95425	0.972518	0.193164	4.95425	0.805607	-0.0725405	4.95425	0.928392	-0.533432	4.95425	0.468421	ENSG00000073969
ENSG00000074054	0.0612008	5.41842	0.938166	0.335866	5.41842	0.663476	-0.0492932	5.41842	0.951494	-0.194029	5.41842	0.806285	ENSG00000074054
ENSG00000074071	-0.880958	5.67749	0.147006	-1.00439	5.67749	0.0710722	-0.426521	5.67749	0.574697	-0.650128	5.67749	0.352264	ENSG00000074071
ENSG00000074201	-0.153241	6.22919	0.847286	-0.297242	6.22919	0.703475	-0.339226	6.22919	0.661803	-0.0301753	6.22919	0.970682	ENSG00000074201
ENSG00000074266	0.131713	5.53806	0.867776	-0.00325861	5.53806	0.997486	-0.211561	5.53806	0.78886	1.057	5.53806	0.0440571	ENSG00000074266
ENSG00000074319	0.256701	5.33722	0.74223	0.505012	5.33722	0.494024	0.167268	5.33722	0.831705	0.46938	5.33722	0.530267	ENSG00000074319
ENSG00000074356	-0.119267	6.4835	0.883559	0.0186583	6.4835	0.981301	-0.145999	6.4835	0.856638	-0.645306	6.4835	0.355899	ENSG00000074356
ENSG00000074410	1.18644	6.33874	0.0104267	1.54057	6.33874	1.73e-05	0.898609	6.33874	0.127924	-0.605376	6.33874	0.395364	ENSG00000074410
ENSG00000074416	0.317044	6.6966	0.682122	0.477867	6.6966	0.522019	-0.766575	6.6966	0.239637	-0.588529	6.6966	0.411849	ENSG00000074416
ENSG00000074527	1.57737	6.63954	0.000651228	1.33397	6.63954	0.00845918	0.0823718	6.63954	0.915913	-0.941013	6.63954	0.139449	ENSG00000074527
ENSG00000074582	-0.0474869	3.72373	0.953173	-0.248971	3.72373	0.751145	-0.0349308	3.72373	0.965984	-0.181317	3.72373	0.818573	ENSG00000074582
ENSG00000074590	0.874139	7.62773	0.154945	0.78602	7.62773	0.226518	0.441371	7.62773	0.557698	-1.1778	7.62773	0.0220768	ENSG00000074590
ENSG00000074603	-0.0666918	5.50113	0.934349	-0.134792	5.50113	0.865809	0.0918403	5.50113	0.90829	0.0206987	5.50113	0.97904	ENSG00000074603
ENSG00000074621	0.420861	3.94023	0.578062	0.676483	3.94023	0.329353	-0.353304	3.94023	0.646343	0.603243	3.94023	0.399416	ENSG00000074621
ENSG00000074657	0.4322	4.93959	0.56886	0.501746	4.93959	0.497317	-0.176741	4.93959	0.823677	0.266798	4.93959	0.732286	ENSG00000074657
ENSG00000074660	1.06218	3.58998	0.0699287	1.57784	3.58998	0.000884049	1.45022	3.58998	0.00285999	-0.0476246	3.58998	0.950698	ENSG00000074660
ENSG00000074695	0.173309	7.60497	0.827638	0.161894	7.60497	0.839676	0.37969	7.60497	0.625704	-0.420767	7.60497	0.588229	ENSG00000074695
ENSG00000074696	-0.764161	6.73013	0.241984	-1.0522	6.73013	0.0434794	-0.114803	6.73013	0.887644	0.00690316	6.73013	0.992841	ENSG00000074696
ENSG00000074706	1.64198	0.422059	0.254836	3.22975	0.422059	0.0115616	1.79224	0.422059	0.17783	7.16529	0.422059	1.69e-11	ENSG00000074706
ENSG00000074755	-0.00536059	4.85301	0.995448	-0.356091	4.85301	0.644999	-0.416816	4.85301	0.58572	-0.437977	4.85301	0.563445	ENSG00000074755
ENSG00000074800	0.0645495	9.52049	0.935717	0.0113114	9.52049	0.988251	0.288036	9.52049	0.710837	0.235448	9.52049	0.763222	ENSG00000074800
ENSG00000074842	0.352777	6.92033	0.647551	0.329034	6.92033	0.670246	0.0192431	6.92033	0.980423	-0.22901	6.92033	0.771374	ENSG00000074842
ENSG00000074935	0.249149	2.08194	0.751754	0.499178	2.08194	0.510226	-0.604562	2.08194	0.418138	0.70397	2.08194	0.334155	ENSG00000074935
ENSG00000075089	-0.0253799	4.95103	0.975325	0.15734	4.95103	0.84177	-0.0507725	4.95103	0.949943	-0.490322	4.95103	0.509884	ENSG00000075089
ENSG00000075131	0.297935	4.54951	0.701037	0.308255	4.54951	0.690807	-0.0109934	4.54951	0.989782	1.17486	4.54951	0.0204788	ENSG00000075131
ENSG00000075142	-0.541197	5.17341	0.460214	-0.687204	5.17341	0.319301	0.0603116	5.17341	0.938517	-0.955215	5.17341	0.111713	ENSG00000075142
ENSG00000075151	-0.0208841	7.15831	0.980025	-0.16435	7.15831	0.836266	0.166843	7.15831	0.832875	-0.579533	7.15831	0.420782	ENSG00000075151
ENSG00000075188	-0.0173109	4.65077	0.98346	-0.0513062	4.65077	0.949328	0.0536045	4.65077	0.945424	0.736424	4.65077	0.271559	ENSG00000075188
ENSG00000075213	3.56511	7.66216	4.02e-19	3.64525	7.66216	1.62e-19	1.17304	7.66216	0.0147435	0.503106	7.66216	0.496168	ENSG00000075213
ENSG00000075218	-0.0782717	7.01413	0.923656	-0.352035	7.01413	0.649839	-0.317136	7.01413	0.683846	-0.308722	7.01413	0.692141	ENSG00000075218
ENSG00000075223	1.64761	6.34598	8.14e-06	1.53636	6.34598	6.48e-05	0.0843317	6.34598	0.914801	-0.607712	6.34598	0.393557	ENSG00000075223
ENSG00000075234	0.105103	3.85248	0.894082	0.770007	3.85248	0.246782	0.179388	3.85248	0.819348	-0.137984	3.85248	0.861366	ENSG00000075234
ENSG00000075239	-0.299582	5.42712	0.701035	-0.45507	5.42712	0.54623	-0.221612	5.42712	0.778857	-0.132654	5.42712	0.867788	ENSG00000075239
ENSG00000075275	0.348024	1.09166	0.673451	-0.761363	1.09166	0.379095	0.384842	1.09166	0.632201	3.29348	1.09166	1.93e-08	ENSG00000075275
ENSG00000075292	0.359105	7.55298	0.641993	0.300062	7.55298	0.698959	0.0577316	7.55298	0.942673	0.71658	7.55298	0.286048	ENSG00000075292
ENSG00000075303	-0.353148	3.40439	0.646572	-0.729318	3.40439	0.291504	0.368014	3.40439	0.630832	-0.285568	3.40439	0.713639	ENSG00000075303
ENSG00000075336	-0.0957456	4.64659	0.904837	-0.462307	4.64659	0.537993	-0.11603	4.64659	0.88459	0.378899	4.64659	0.620865	ENSG00000075336
ENSG00000075391	0.599626	4.80914	0.400176	0.723605	4.80914	0.281713	-0.21438	4.80914	0.78594	-0.0224776	4.80914	0.977928	ENSG00000075391
ENSG00000075407	-0.323604	6.22198	0.677314	-0.618189	6.22198	0.382526	-0.327123	6.22198	0.673851	-0.379773	6.22198	0.622712	ENSG00000075407
ENSG00000075413	0.0416578	5.34879	0.958456	0.538016	5.34879	0.460947	0.23674	5.34879	0.762081	-0.111392	5.34879	0.889451	ENSG00000075413
ENSG00000075415	0.221092	7.71795	0.777499	0.170509	7.71795	0.82819	0.401236	7.71795	0.598192	-0.063129	7.71795	0.93794	ENSG00000075415
ENSG00000075420	0.759046	7.5872	0.245142	1.24582	7.5872	0.00399085	0.237583	7.5872	0.761117	-0.248304	7.5872	0.752165	ENSG00000075420
ENSG00000075426	0.617093	8.28096	0.38175	0.587036	8.28096	0.411541	0.166076	8.28096	0.832741	-1.90299	8.28096	1.8e-07	ENSG00000075426
ENSG00000075539	0.45209	6.12432	0.548962	0.294596	6.12432	0.704444	-0.117009	6.12432	0.883918	-0.282263	6.12432	0.718253	ENSG00000075539
ENSG00000075568	-0.082917	5.03147	0.917632	0.0157546	5.03147	0.983722	-0.130564	5.03147	0.869954	0.0550392	5.03147	0.944517	ENSG00000075568
ENSG00000075618	-0.840715	6.16997	0.175141	-1.21792	6.16997	0.0086296	-0.447335	6.16997	0.555059	-0.0619448	6.16997	0.939156	ENSG00000075618
ENSG00000075624	-0.475758	7.93752	0.525831	-0.441964	7.93752	0.560754	-0.906549	7.93752	0.120977	-0.759555	7.93752	0.246078	ENSG00000075624
ENSG00000075643	0.0252004	4.63403	0.974145	0.294111	4.63403	0.704879	0.167347	4.63403	0.831526	-1.04413	4.63403	0.073979	ENSG00000075643
ENSG00000075651	1.29593	5.20673	0.00404906	1.40118	5.20673	0.000908383	0.69733	5.20673	0.305273	0.986871	5.20673	0.0826621	ENSG00000075651
ENSG00000075702	-0.156166	4.13126	0.844183	-0.438165	4.13126	0.561903	0.176637	4.13126	0.822175	-0.431765	4.13126	0.56818	ENSG00000075702
ENSG00000075711	0.316539	6.83668	0.682627	0.2595	6.83668	0.73931	0.0818635	6.83668	0.918883	-0.878231	6.83668	0.145543	ENSG00000075711
ENSG00000075785	-0.0664459	8.84108	0.935305	-0.0564316	8.84108	0.945119	0.0402827	8.84108	0.959976	-0.195864	8.84108	0.804648	ENSG00000075785
ENSG00000075790	0.602495	7.38811	0.396205	0.790936	7.38811	0.21598	0.300706	7.38811	0.698309	0.183116	7.38811	0.815741	ENSG00000075790
ENSG00000075826	-0.489873	2.23519	0.515815	-0.648298	2.23519	0.375378	0.0978633	2.23519	0.900829	-1.14862	2.23519	0.0924263	ENSG00000075826
ENSG00000075856	0.192286	6.16128	0.806535	-0.0712937	6.16128	0.929895	-0.166528	6.16128	0.833951	-1.01091	6.16128	0.0666906	ENSG00000075856
ENSG00000075914	-0.199135	4.36988	0.801307	-0.410131	4.36988	0.590292	0.0200051	4.36988	0.97902	-0.726815	4.36988	0.285321	ENSG00000075914
ENSG00000075945	0.421123	4.60557	0.578042	0.793182	4.60557	0.221424	0.255984	4.60557	0.74279	0.320987	4.60557	0.678251	ENSG00000075945
ENSG00000075975	-0.40563	2.97859	0.594703	-0.442595	2.97859	0.558416	-0.572855	2.97859	0.432229	-0.786929	2.97859	0.257235	ENSG00000075975
ENSG00000076003	-0.973832	5.49868	0.0863551	-1.56077	5.49868	0.000109944	0.0900005	5.49868	0.909517	0.116463	5.49868	0.882949	ENSG00000076003
ENSG00000076043	-0.156862	5.89846	0.844335	-0.487707	5.89846	0.514399	0.498552	5.89846	0.500942	0.236212	5.89846	0.762428	ENSG00000076043
ENSG00000076053	-0.237886	3.42259	0.761492	0.320332	3.42259	0.678516	0.340645	3.42259	0.657807	0.908449	3.42259	0.150744	ENSG00000076053
ENSG00000076067	0.0192862	5.8718	0.98004	0.441665	5.8718	0.558304	-0.207334	5.8718	0.793092	-0.968286	5.8718	0.0912221	ENSG00000076067
ENSG00000076108	0.555783	7.66228	0.442844	0.816251	7.66228	0.193193	-0.0106541	7.66228	0.990284	-0.602149	7.66228	0.39832	ENSG00000076108
ENSG00000076201	-0.272214	5.60524	0.72853	-0.117899	5.60524	0.882879	-0.60504	5.60524	0.39673	-1.66548	5.60524	0.000161489	ENSG00000076201
ENSG00000076242	0.151301	5.40903	0.848153	0.196171	5.40903	0.802739	-0.15743	5.40903	0.84305	-0.11953	5.40903	0.881004	ENSG00000076242
ENSG00000076248	-0.883525	6.85039	0.149988	-1.27123	6.85039	0.00850168	-0.151068	6.85039	0.850006	-0.000282524	6.85039	1.00093	ENSG00000076248
ENSG00000076321	0.176652	4.38979	0.822237	0.187784	4.38979	0.811158	-0.00389208	4.38979	0.996987	-0.401117	4.38979	0.598952	ENSG00000076321
ENSG00000076351	-0.44083	2.11539	0.567759	-1.05804	2.11539	0.136352	-0.144645	2.11539	0.856147	0.0538197	2.11539	0.947354	ENSG00000076351
ENSG00000076356	-0.289726	6.10858	0.710994	-0.353514	6.10858	0.647935	-0.756829	6.10858	0.249137	-1.33381	6.10858	0.00227331	ENSG00000076356
ENSG00000076382	0.0479231	4.86666	0.951515	-0.528551	4.86666	0.471864	0.17011	4.86666	0.828794	-0.208129	4.86666	0.792087	ENSG00000076382
ENSG00000076513	-0.471178	6.30414	0.530401	-0.500173	6.30414	0.500425	-0.163427	6.30414	0.837078	-0.291729	6.30414	0.708947	ENSG00000076513
ENSG00000076555	-1.38189	1.90435	0.038797	-2.06534	1.90435	0.00251518	-0.265733	1.90435	0.735043	-0.393974	1.90435	0.612552	ENSG00000076555
ENSG00000076641	1.17229	3.4455	0.0848387	0.716938	3.4455	0.341479	-0.035044	3.4455	0.967053	-0.157119	3.4455	0.847527	ENSG00000076641
ENSG00000076650	0.154676	4.9191	0.844276	-0.0858073	4.9191	0.914703	-0.310406	4.9191	0.69007	-0.0923031	4.9191	0.908057	ENSG00000076650
ENSG00000076685	1.19553	4.78463	0.0321629	1.90119	4.78463	2.51e-05	0.275507	4.78463	0.723403	1.20376	4.78463	0.0333789	ENSG00000076685
ENSG00000076706	0.121158	9.2473	0.87874	0.161151	9.2473	0.838137	-0.173714	9.2473	0.826893	-1.25099	9.2473	0.00454782	ENSG00000076706
ENSG00000076928	0.0614677	3.3312	0.93764	0.177116	3.3312	0.821887	-0.101551	3.3312	0.899063	0.535958	3.3312	0.467433	ENSG00000076928
ENSG00000076984	0.0667309	6.0735	0.933057	0.0250197	6.0735	0.974552	0.0619351	6.0735	0.937847	-0.366841	6.0735	0.634523	ENSG00000076984
ENSG00000077044	0.601731	5.21387	0.397602	0.0669093	5.21387	0.932492	-0.321305	5.21387	0.679276	-1.12944	5.21387	0.034899	ENSG00000077044
ENSG00000077097	-0.076552	6.64882	0.925282	-0.0565672	6.64882	0.944895	-0.105454	6.64882	0.896749	-0.758948	6.64882	0.247389	ENSG00000077097
ENSG00000077147	0.189629	9.1876	0.809007	0.00428934	9.1876	0.994679	-0.0543535	9.1876	0.946787	-0.519035	9.1876	0.481758	ENSG00000077147
ENSG00000077150	2.59338	4.99628	5.72e-09	3.4288	4.99628	1.59e-13	1.31903	4.99628	0.0152532	2.35851	4.99628	2.39e-07	ENSG00000077150
ENSG00000077152	-0.303024	5.3572	0.698373	-0.487255	5.3572	0.515772	0.102184	5.3572	0.896152	0.825206	5.3572	0.207152	ENSG00000077152
ENSG00000077157	-0.898433	5.1625	0.170715	-0.169629	5.1625	0.831874	-0.542033	5.1625	0.464224	-0.512507	5.1625	0.493661	ENSG00000077157
ENSG00000077232	0.179404	6.81785	0.819997	0.38699	6.81785	0.616649	0.0363677	6.81785	0.963834	-0.173289	6.81785	0.827132	ENSG00000077232
ENSG00000077235	0.193607	6.66269	0.805176	-0.221237	6.66269	0.779146	-0.388095	6.66269	0.613394	-0.546594	6.66269	0.453745	ENSG00000077235
ENSG00000077238	0.225718	7.05729	0.772912	0.116135	7.05729	0.882878	0.652163	7.05729	0.347823	0.10157	7.05729	0.897497	ENSG00000077238
ENSG00000077254	-0.111439	7.5005	0.891477	0.208584	7.5005	0.79013	0.0962475	7.5005	0.90553	0.21667	7.5005	0.782062	ENSG00000077254
ENSG00000077312	-0.455002	6.35805	0.547519	-0.350502	6.35805	0.651383	-0.450355	6.35805	0.552109	-0.0156891	6.35805	0.98595	ENSG00000077312
ENSG00000077348	-0.261913	4.2023	0.738457	-0.993454	4.2023	0.0942542	-0.00704523	4.2023	0.993855	-0.528382	4.2023	0.472618	ENSG00000077348
ENSG00000077380	0.131786	7.81324	0.867892	0.260283	7.81324	0.738462	-0.0212547	7.81324	0.979702	-0.420532	7.81324	0.582187	ENSG00000077380
ENSG00000077458	0.106226	5.26172	0.892972	0.105091	5.26172	0.894139	0.0927352	5.26172	0.906448	1.39162	5.26172	0.000866965	ENSG00000077458
ENSG00000077463	0.0351214	5.31938	0.963561	0.159026	5.31938	0.839572	-0.378742	5.31938	0.622577	1.01742	5.31938	0.0802259	ENSG00000077463
ENSG00000077514	0.0674888	6.064	0.933129	0.146499	6.064	0.853824	0.00874711	6.064	0.990972	-0.0407363	6.064	0.960285	ENSG00000077514
ENSG00000077549	-0.435792	7.62455	0.565713	-0.0636894	7.62455	0.937464	-0.064813	7.62455	0.936355	-0.401014	7.62455	0.600496	ENSG00000077549
ENSG00000077585	-0.498611	3.28148	0.507612	-0.689138	3.28148	0.340076	0.726488	3.28148	0.294989	-0.545268	3.28148	0.467546	ENSG00000077585
ENSG00000077684	-1.04181	6.03899	0.0491451	-1.48473	6.03899	0.000169548	-0.499404	6.03899	0.501266	-0.875594	6.03899	0.148666	ENSG00000077684
ENSG00000077713	0.00961047	1.59963	0.994419	-0.855216	1.59963	0.335117	1.38104	1.59963	0.0486817	-0.482041	1.59963	0.590362	ENSG00000077713
ENSG00000077721	0.0689697	6.48428	0.929814	0.427781	6.48428	0.571344	0.164482	6.48428	0.834142	0.0905302	6.48428	0.908297	ENSG00000077721
ENSG00000077782	0.265038	5.68931	0.733884	0.114812	5.68931	0.884886	0.0999036	5.68931	0.899905	0.387403	5.68931	0.613253	ENSG00000077782
ENSG00000077935	0.0310003	1.14155	0.976851	-0.204454	1.14155	0.804561	0.169976	1.14155	0.839592	3.20696	1.14155	8.1e-08	ENSG00000077935
ENSG00000077942	-0.772326	3.72422	0.254883	-1.03628	3.72422	0.0916492	-0.323012	3.72422	0.677765	-0.548637	3.72422	0.456342	ENSG00000077942
ENSG00000078018	-0.247994	7.51464	0.75247	0.530321	7.51464	0.46852	-0.277363	7.51464	0.723267	0.240709	7.51464	0.758068	ENSG00000078018
ENSG00000078043	-0.116956	4.08043	0.883566	-0.5835	4.08043	0.418741	0.00520754	4.08043	0.994108	-1.09006	4.08043	0.0613035	ENSG00000078043
ENSG00000078061	-0.03735	3.8696	0.963292	0.215941	3.8696	0.782952	-0.380115	3.8696	0.620015	-0.744386	3.8696	0.275564	ENSG00000078061
ENSG00000078070	0.155473	4.49443	0.8438	-0.0368631	4.49443	0.963683	-0.0341652	4.49443	0.966554	0.944306	4.49443	0.110345	ENSG00000078070
ENSG00000078081	2.22164	6.25826	2.15e-07	2.99356	6.25826	6.09e-12	0.877581	6.25826	0.171055	1.99696	6.25826	6.83e-06	ENSG00000078081
ENSG00000078098	1.50258	2.28556	0.191386	-0.335391	2.28556	0.814766	1.16129	2.28556	0.304751	8.45309	2.28556	1.4e-18	ENSG00000078098
ENSG00000078114	-1.58369	5.31681	6.69e-05	-1.63709	5.31681	3.07e-05	-0.181056	5.31681	0.819483	-0.418572	5.31681	0.584252	ENSG00000078114
ENSG00000078124	-0.506099	4.55539	0.494297	-0.379991	4.55539	0.620366	-0.403678	4.55539	0.596945	-0.615917	4.55539	0.386944	ENSG00000078124
ENSG00000078140	0.0974533	7.44369	0.903527	0.160606	7.44369	0.839515	-0.0799727	7.44369	0.921876	-0.23008	7.44369	0.770339	ENSG00000078140
ENSG00000078142	0.0259557	5.86033	0.973934	0.106402	5.86033	0.89397	-0.0065254	5.86033	0.994314	0.158524	5.86033	0.841044	ENSG00000078142
ENSG00000078177	0.0976516	3.98765	0.901569	-0.138502	3.98765	0.861472	-0.222442	3.98765	0.777666	0.112053	3.98765	0.887458	ENSG00000078177
ENSG00000078237	0.0935144	4.61947	0.905582	0.211548	4.61947	0.787371	-0.0514969	4.61947	0.949216	-0.339498	4.61947	0.660494	ENSG00000078237
ENSG00000078246	0.195367	5.8691	0.80348	-0.143195	5.8691	0.857791	0.00645071	5.8691	0.993233	0.668616	5.8691	0.331885	ENSG00000078246
ENSG00000078269	0.78309	6.8799	0.223094	1.02864	6.8799	0.0499187	-0.0380796	6.8799	0.963009	-1.05988	6.8799	0.0437741	ENSG00000078269
ENSG00000078304	-0.288151	5.45415	0.712461	-0.691723	5.45415	0.31171	0.0433148	5.45415	0.956078	-0.342583	5.45415	0.658099	ENSG00000078304
ENSG00000078369	0.0665877	8.70839	0.934301	0.0308408	8.70839	0.969269	-0.136446	8.70839	0.866348	-0.060189	8.70839	0.94141	ENSG00000078369
ENSG00000078401	0.395884	7.99296	0.603099	1.31749	7.99296	0.00408122	0.328513	7.99296	0.670242	0.12357	7.99296	0.875017	ENSG00000078401
ENSG00000078403	-0.202585	4.67587	0.797848	-0.371448	4.67587	0.62905	-0.166015	4.67587	0.834515	-0.615791	4.67587	0.386661	ENSG00000078403
ENSG00000078487	0.245282	3.54522	0.753668	0.279014	3.54522	0.720191	-0.0638051	3.54522	0.936602	1.34425	3.54522	0.0106651	ENSG00000078487
ENSG00000078596	-0.522965	7.06836	0.4775	-0.916909	7.06836	0.115016	0.253374	7.06836	0.745333	0.15006	7.06836	0.848955	ENSG00000078596
ENSG00000078618	0.232751	7.89611	0.765923	0.258001	7.89611	0.74074	0.124854	7.89611	0.875847	-0.198548	7.89611	0.801882	ENSG00000078618
ENSG00000078668	-0.471637	6.41111	0.529485	-0.406913	6.41111	0.594964	0.0386488	6.41111	0.960867	-0.376581	6.41111	0.624943	ENSG00000078668
ENSG00000078674	0.124659	7.72879	0.876486	-0.163473	7.72879	0.837537	-0.107185	7.72879	0.895007	-0.339364	7.72879	0.661827	ENSG00000078674
ENSG00000078687	-0.317664	4.02904	0.682447	-0.386192	4.02904	0.613789	-0.0555899	4.02904	0.945153	-1.05296	4.02904	0.0777387	ENSG00000078687
ENSG00000078699	0.177938	3.71308	0.82102	0.344249	3.71308	0.654655	0.0349232	3.71308	0.964348	-0.354343	3.71308	0.644872	ENSG00000078699
ENSG00000078747	0.121342	5.05493	0.877997	0.160865	5.05493	0.838229	-0.0741029	5.05493	0.926573	0.220109	5.05493	0.778961	ENSG00000078747
ENSG00000078804	0.218343	4.67536	0.780441	0.180289	4.67536	0.818625	0.353932	4.67536	0.645073	0.94308	4.67536	0.136684	ENSG00000078804
ENSG00000078808	-0.0397665	7.75559	0.961277	-0.0522646	7.75559	0.948801	-0.322785	7.75559	0.678312	-0.140077	7.75559	0.860636	ENSG00000078808
ENSG00000078902	0.0201686	6.08904	0.978053	-0.0951034	6.08904	0.906569	-0.926712	6.08904	0.138623	-1.15487	6.08904	0.0438752	ENSG00000078902
ENSG00000078967	-0.0947091	3.48269	0.905536	-0.214908	3.48269	0.784787	-0.307613	3.48269	0.692314	-0.169124	3.48269	0.830341	ENSG00000078967
ENSG00000079134	0.105205	5.15818	0.893906	0.303083	5.15818	0.695954	-0.373764	5.15818	0.626778	1.51388	5.15818	0.00017034	ENSG00000079134
ENSG00000079150	-0.428524	2.13572	0.575932	-0.721077	2.13572	0.327382	0.476488	2.13572	0.526261	0.771169	2.13572	0.275191	ENSG00000079150
ENSG00000079156	-0.797223	3.93651	0.2278	-1.05984	3.93651	0.0722855	-0.0615019	3.93651	0.939188	0.259248	3.93651	0.739803	ENSG00000079156
ENSG00000079246	0.183552	8.52383	0.816344	0.188463	8.52383	0.811059	0.333032	8.52383	0.666248	-0.223141	8.52383	0.777337	ENSG00000079246
ENSG00000079257	-0.369334	2.0234	0.639177	-1.1419	2.0234	0.128912	0.450952	2.0234	0.55686	0.625625	2.0234	0.41026	ENSG00000079257
ENSG00000079277	0.111364	4.46908	0.887835	0.385704	4.46908	0.613618	-0.00037719	4.46908	1.00044	0.403137	4.46908	0.596246	ENSG00000079277
ENSG00000079308	-0.35336	3.06623	0.646273	0.698781	3.06623	0.315466	-0.331707	3.06623	0.668053	-1.17034	3.06623	0.0705945	ENSG00000079308
ENSG00000079332	0.208984	7.19405	0.789743	0.703659	7.19405	0.298915	0.0469169	7.19405	0.953434	0.622581	7.19405	0.376379	ENSG00000079332
ENSG00000079335	0.987813	2.04928	0.170717	2.40272	2.04928	2.44e-05	0.411888	2.04928	0.602131	3.30034	2.04928	4.9e-09	ENSG00000079335
ENSG00000079337	-0.395356	2.84808	0.608026	0.181823	2.84808	0.817773	-0.252136	2.84808	0.748673	-0.702675	2.84808	0.340749	ENSG00000079337
ENSG00000079385	2.00559	3.42936	3.36e-05	2.69744	3.42936	6.15e-09	0.699385	3.42936	0.325393	1.35784	3.42936	0.0230971	ENSG00000079385
ENSG00000079387	-0.0876834	6.17767	0.913848	-0.0571279	6.17767	0.944145	-0.427499	6.17767	0.576611	0.469887	6.17767	0.531792	ENSG00000079387
ENSG00000079432	0.18836	4.5847	0.810412	0.00299358	4.5847	0.996181	-0.0679966	4.5847	0.932852	0.478246	4.5847	0.521473	ENSG00000079432
ENSG00000079459	0.765291	7.50197	0.239303	0.334648	7.50197	0.664674	0.550056	7.50197	0.44859	-0.203735	7.50197	0.796665	ENSG00000079459
ENSG00000079462	-0.887376	4.88065	0.162505	-1.16704	4.88065	0.0377305	-0.0858348	4.88065	0.915408	-0.470681	4.88065	0.531285	ENSG00000079462
ENSG00000079482	-0.409431	2.69432	0.59135	-0.970538	2.69432	0.144312	-0.136027	2.69432	0.864151	-1.10013	2.69432	0.0957121	ENSG00000079482
ENSG00000079616	-0.325043	5.54214	0.675734	-0.425939	5.54214	0.574973	-0.0739371	5.54214	0.926919	-0.24632	5.54214	0.754118	ENSG00000079616
ENSG00000079691	-0.690907	4.25923	0.31642	-1.12415	4.25923	0.0443448	0.00956578	4.25923	0.989795	0.310791	4.25923	0.688382	ENSG00000079691
ENSG00000079739	-0.383284	3.96603	0.617232	0.102341	3.96603	0.896682	0.694381	3.96603	0.314158	-1.27045	3.96603	0.0311658	ENSG00000079739
ENSG00000079785	-0.122012	7.68044	0.880005	-0.133505	7.68044	0.868332	-0.419462	7.68044	0.586549	-0.413871	7.68044	0.591754	ENSG00000079785
ENSG00000079805	-0.242009	6.54616	0.758428	-0.241669	6.54616	0.758767	-0.141795	6.54616	0.858899	-0.319244	6.54616	0.681627	ENSG00000079805
ENSG00000079819	0.16767	7.05157	0.832403	0.14844	7.05157	0.852292	-0.323903	7.05157	0.677101	0.111234	7.05157	0.889919	ENSG00000079819
ENSG00000079950	-0.128758	5.11737	0.871781	-0.0725169	5.11737	0.928302	-0.0555318	5.11737	0.945387	-1.00646	5.11737	0.0782618	ENSG00000079950
ENSG00000079974	0.273241	5.19295	0.725356	0.29738	5.19295	0.701306	-0.477672	5.19295	0.524257	-0.277755	5.19295	0.723088	ENSG00000079974
ENSG00000079999	-0.400517	5.94587	0.600985	-0.201393	5.94587	0.799035	-0.338707	5.94587	0.662283	-1.10373	5.94587	0.0328183	ENSG00000079999
ENSG00000080031	1.03619	2.07053	0.123767	1.37376	2.07053	0.0259106	0.623565	2.07053	0.399259	2.00005	2.07053	0.00018861	ENSG00000080031
ENSG00000080189	0.11975	4.41795	0.879539	0.323084	4.41795	0.676094	-0.197135	4.41795	0.803295	-0.963767	4.41795	0.114071	ENSG00000080189
ENSG00000080200	0.345749	4.15573	0.653102	0.207314	4.15573	0.791572	-0.419269	4.15573	0.581378	-0.226914	4.15573	0.772881	ENSG00000080200
ENSG00000080298	0.153271	3.35374	0.845802	0.351095	3.35374	0.647839	0.368297	3.35374	0.630144	1.04307	3.35374	0.0796744	ENSG00000080298
ENSG00000080345	0.181962	8.02148	0.817364	0.131389	8.02148	0.869594	-0.147619	8.02148	0.853975	0.0577541	8.02148	0.942793	ENSG00000080345
ENSG00000080371	0.0392437	5.71367	0.960201	-0.150258	5.71367	0.850203	-0.184266	5.71367	0.816182	0.861754	5.71367	0.15824	ENSG00000080371
ENSG00000080503	-0.670409	7.3965	0.331189	-1.04959	7.3965	0.0432391	-0.376329	7.3965	0.62636	0.0345828	7.3965	0.965213	ENSG00000080503
ENSG00000080546	0.117065	3.46089	0.882206	0.0971183	3.46089	0.902426	0.00714881	3.46089	0.992193	1.46238	3.46089	0.00307021	ENSG00000080546
ENSG00000080561	0.38234	1.78719	0.627369	0.512074	1.78719	0.509118	0.030796	1.78719	0.970532	-0.259138	1.78719	0.746655	ENSG00000080561
ENSG00000080573	0	0.0848674	1	0	0.0848674	1	0	0.0848674	1	8.11658	0.0848674	6.62e-08	ENSG00000080573
ENSG00000080608	0.585344	7.74182	0.413216	0.449611	7.74182	0.555596	-0.10571	7.74182	0.896593	-0.423983	7.74182	0.582353	ENSG00000080608
ENSG00000080802	-0.273897	5.20077	0.726537	0.170463	5.20077	0.828631	-0.187099	5.20077	0.813342	1.13696	5.20077	0.0225632	ENSG00000080802
ENSG00000080815	0.460884	6.33202	0.544064	0.89266	6.33202	0.132311	-0.0117279	6.33202	0.989091	0.4541	6.33202	0.551029	ENSG00000080815
ENSG00000080819	-0.75062	4.09634	0.266674	-0.999688	4.09634	0.0978787	-0.0409982	4.09634	0.959924	-0.502597	4.09634	0.498965	ENSG00000080819
ENSG00000080822	-0.0786913	3.94294	0.922823	0.0212461	3.94294	0.978131	0.660587	3.94294	0.367102	0.204183	3.94294	0.79811	ENSG00000080822
ENSG00000080823	0.0271185	2.98218	0.972041	-0.141767	2.98218	0.859872	-0.398303	2.98218	0.610173	-0.0222966	2.98218	0.97759	ENSG00000080823
ENSG00000080824	0.355514	10.8004	0.644441	0.288137	10.8004	0.710729	-0.111905	10.8004	0.889208	-0.538079	10.8004	0.462651	ENSG00000080824
ENSG00000080839	-0.319981	5.80885	0.680833	-0.474768	5.80885	0.526982	-0.318617	5.80885	0.682232	-0.781647	5.80885	0.228582	ENSG00000080839
ENSG00000080845	0.669667	5.8726	0.33068	0.755165	5.8726	0.249763	-0.228835	5.8726	0.771591	-0.607353	5.8726	0.393537	ENSG00000080845
ENSG00000080986	-0.226658	7.09713	0.773728	-0.331805	7.09713	0.669267	-0.201674	7.09713	0.798709	0.270382	7.09713	0.72848	ENSG00000080986
ENSG00000081014	-0.15889	4.8064	0.841563	-0.124589	4.8064	0.875883	-0.621857	4.8064	0.379789	-0.527905	4.8064	0.472595	ENSG00000081014
ENSG00000081019	0.276712	4.50265	0.72213	0.198968	4.50265	0.799963	-0.417693	4.50265	0.583204	-0.0509357	4.50265	0.949395	ENSG00000081019
ENSG00000081026	-0.344361	5.03091	0.656295	-0.504661	5.03091	0.495738	-0.199576	5.03091	0.800927	-1.10648	5.03091	0.040664	ENSG00000081026
ENSG00000081041	3.91633	6.5989	3.63e-14	4.97485	6.5989	2.14e-18	3.35829	6.5989	1.18e-11	6.26342	6.5989	2.7e-22	ENSG00000081041
ENSG00000081059	-0.392107	2.78277	0.608196	-0.40751	2.78277	0.593201	0.194824	2.78277	0.803684	-0.303287	2.78277	0.695939	ENSG00000081059
ENSG00000081087	0.194461	5.21158	0.804416	-0.0387721	5.21158	0.961919	0.170644	5.21158	0.828204	-0.191439	5.21158	0.808868	ENSG00000081087
ENSG00000081154	0.00238264	6.59056	0.99701	-0.0725273	6.59056	0.928661	-0.0608755	6.59056	0.940332	-0.111765	6.59056	0.889236	ENSG00000081154
ENSG00000081177	-0.182851	2.31539	0.815997	-0.11781	2.31539	0.88088	0.1285	2.31539	0.870562	0.0523682	2.31539	0.949472	ENSG00000081177
ENSG00000081189	0.802486	5.50352	0.208836	0.651662	5.50352	0.348822	-0.000711301	5.50352	1	1.77351	5.50352	1.27e-07	ENSG00000081189
ENSG00000081237	1.79434	1.33417	0.0100675	1.65343	1.33417	0.021999	0.432324	1.33417	0.603468	3.40351	1.33417	9.95e-08	ENSG00000081237
ENSG00000081307	-0.206381	4.62951	0.793989	-0.113647	4.62951	0.886805	-0.165845	4.62951	0.834662	-0.0443061	4.62951	0.956153	ENSG00000081307
ENSG00000081320	-0.0753087	4.66781	0.925274	-0.387586	4.66781	0.612733	0.0833952	4.66781	0.915748	0.22768	4.66781	0.771371	ENSG00000081320
ENSG00000081386	-0.274549	2.80742	0.726172	-0.221739	2.80742	0.778411	0.0789695	2.80742	0.919714	1.02018	2.80742	0.112231	ENSG00000081386
ENSG00000081665	0.0639325	2.51305	0.935713	-0.453	2.51305	0.550913	-0.564534	2.51305	0.444765	0.799115	2.51305	0.245267	ENSG00000081665
ENSG00000081692	-0.324788	4.17366	0.676827	-0.583024	4.17366	0.425763	-0.372761	4.17366	0.629228	-1.66689	4.17366	0.00306246	ENSG00000081692
ENSG00000081721	-0.0037068	3.56205	0.996876	0.337089	3.56205	0.661903	-0.129982	3.56205	0.870487	0.45004	3.56205	0.550408	ENSG00000081721
ENSG00000081760	-0.21063	4.91138	0.789824	-0.453425	4.91138	0.547095	-0.28943	4.91138	0.711161	-0.578021	4.91138	0.423017	ENSG00000081760
ENSG00000081791	-0.0702107	5.49425	0.930659	-0.238268	5.49425	0.76235	-0.0972685	5.49425	0.903596	-0.618114	5.49425	0.384554	ENSG00000081791
ENSG00000081803	-0.53752	6.11702	0.462838	-0.510689	6.11702	0.489785	0.071079	6.11702	0.929041	-0.364812	6.11702	0.636825	ENSG00000081803
ENSG00000081870	-0.219133	5.54223	0.781793	-0.218771	5.54223	0.782122	-0.0272552	5.54223	0.973929	-0.318844	5.54223	0.68204	ENSG00000081870
ENSG00000081913	-0.814504	5.35199	0.204077	-0.984037	5.35199	0.0881396	-0.791907	5.35199	0.222451	-0.0995405	5.35199	0.901233	ENSG00000081913
ENSG00000081923	1.25646	6.5799	0.00768761	0.830625	6.5799	0.188668	-0.539672	6.5799	0.461679	-1.24096	6.5799	0.0150826	ENSG00000081923
ENSG00000082068	0.107708	5.48821	0.892731	-0.136462	5.48821	0.864307	-0.0988976	5.48821	0.902463	-0.179603	5.48821	0.820725	ENSG00000082068
ENSG00000082074	0.565533	0.835753	0.623044	2.71916	0.835753	0.00297554	-2.59494	0.835753	0.0743631	6.25561	0.835753	2.09e-13	ENSG00000082074
ENSG00000082126	2.11253	3.56958	0.0416683	2.48539	3.56958	0.0145287	1.23905	3.56958	0.256332	9.04382	3.56958	1.2e-20	ENSG00000082126
ENSG00000082146	-0.680693	3.14657	0.332953	-1.16228	3.14657	0.0516148	-0.644762	3.14657	0.363753	-1.14127	3.14657	0.0636548	ENSG00000082146
ENSG00000082153	0.370645	6.36841	0.628606	0.33671	6.36841	0.662386	0.099311	6.36841	0.899615	0.499629	6.36841	0.499579	ENSG00000082153
ENSG00000082212	0.300917	5.0393	0.697966	0.473275	5.0393	0.525925	0.205193	5.0393	0.793523	0.261468	5.0393	0.737541	ENSG00000082212
ENSG00000082213	-0.133082	4.50163	0.867416	-0.0655729	4.50163	0.93502	-0.247055	4.50163	0.753427	-0.172466	4.50163	0.827764	ENSG00000082213
ENSG00000082258	0.140323	4.84405	0.85871	0.429208	4.84405	0.570054	-0.000898746	4.84405	0.999899	1.44122	4.84405	0.000547352	ENSG00000082258
ENSG00000082269	0.171093	4.23253	0.827902	0.208658	4.23253	0.790266	0.03426	4.23253	0.965172	-0.754342	4.23253	0.264986	ENSG00000082269
ENSG00000082397	0.798802	6.98393	0.210844	1.01501	6.98393	0.0595251	0.579589	6.98393	0.419211	0.777131	6.98393	0.23056	ENSG00000082397
ENSG00000082438	0.529987	5.45403	0.468942	0.963669	5.45403	0.0888418	-0.00366866	5.45403	0.997121	-0.122428	5.45403	0.877887	ENSG00000082438
ENSG00000082458	0.200014	1.57719	0.808147	-0.522859	1.57719	0.522679	-0.0664007	1.57719	0.93313	1.76543	1.57719	0.00530233	ENSG00000082458
ENSG00000082497	-0.347992	3.44281	0.651833	-0.0514042	3.44281	0.948928	-0.123106	3.44281	0.877308	-0.27402	3.44281	0.725386	ENSG00000082497
ENSG00000082512	-0.488319	3.93086	0.512226	-0.196596	3.93086	0.803665	-0.303258	3.93086	0.697127	-1.51015	3.93086	0.00341824	ENSG00000082512
ENSG00000082515	-0.0279395	5.73136	0.972832	0.0576213	5.73136	0.942035	0.131713	5.73136	0.867712	-0.312614	5.73136	0.687945	ENSG00000082515
ENSG00000082516	0.271801	4.2493	0.727056	0.137506	4.2493	0.86161	-0.0421393	4.2493	0.958591	-0.910722	4.2493	0.149007	ENSG00000082516
ENSG00000082641	0.740854	7.2626	0.263792	1.38074	7.2626	0.000397787	0.135318	7.2626	0.866144	0.607142	7.2626	0.391732	ENSG00000082641
ENSG00000082701	-0.222086	6.56737	0.778299	-0.163965	6.56737	0.838208	-0.0679544	6.56737	0.933711	1.1632	6.56737	0.0128099	ENSG00000082701
ENSG00000082781	-0.192878	6.5302	0.808136	-0.267068	6.5302	0.734011	0.256951	6.5302	0.741644	-0.245934	6.5302	0.755065	ENSG00000082781
ENSG00000082805	0.767664	7.92739	0.237034	0.702448	7.92739	0.299485	-0.250888	7.92739	0.749609	-1.07388	7.92739	0.0354654	ENSG00000082805
ENSG00000082898	0.255651	7.31888	0.742975	0.164633	7.31888	0.834184	0.168752	7.31888	0.830023	0.358811	7.31888	0.640628	ENSG00000082898
ENSG00000082996	0.134663	5.32667	0.864404	0.345652	5.32667	0.653618	0.231113	5.32667	0.767717	0.449297	5.32667	0.550138	ENSG00000082996
ENSG00000083067	0.579664	2.07614	0.462334	0.409246	2.07614	0.616849	0.75419	2.07614	0.315267	4.90684	2.07614	4.31e-16	ENSG00000083067
ENSG00000083093	0.255807	5.05304	0.74304	0.174363	5.05304	0.824598	0.266001	5.05304	0.732734	2.34821	5.05304	6.39e-10	ENSG00000083093
ENSG00000083097	0.323437	3.83428	0.675378	0.49873	3.83428	0.500751	-0.513903	3.83428	0.486795	0.073457	3.83428	0.926233	ENSG00000083097
ENSG00000083099	0.391247	6.92296	0.609348	0.317516	6.92296	0.681667	-0.0207907	6.92296	0.980108	-0.205091	6.92296	0.795283	ENSG00000083099
ENSG00000083123	-1.09805	1.99209	0.169494	-0.334606	1.99209	0.683118	0.234427	1.99209	0.77006	0.0387063	1.99209	0.966087	ENSG00000083123
ENSG00000083168	-0.0864893	7.12111	0.914752	-0.268554	7.12111	0.732015	-0.411974	7.12111	0.590814	-0.635905	7.12111	0.364967	ENSG00000083168
ENSG00000083223	0.410299	5.94541	0.594022	0.389095	5.94541	0.614243	-0.0380735	5.94541	0.962958	1.26245	5.94541	0.00426724	ENSG00000083223
ENSG00000083290	-0.872519	4.2223	0.165719	-1.09987	4.2223	0.0502617	-0.653199	4.2223	0.350796	0.125733	4.2223	0.873519	ENSG00000083290
ENSG00000083312	0.112754	9.53299	0.887354	0.394665	9.53299	0.607298	0.01637	9.53299	0.983178	-0.381238	9.53299	0.621735	ENSG00000083312
ENSG00000083444	-0.276846	6.37778	0.723764	-0.449502	6.37778	0.552045	-0.0487462	6.37778	0.952269	-0.671086	6.37778	0.330852	ENSG00000083444
ENSG00000083454	-0.176366	2.04575	0.822966	-0.564793	2.04575	0.456357	0.233425	2.04575	0.765714	0.194881	2.04575	0.807267	ENSG00000083454
ENSG00000083457	-0.695506	3.91467	0.313715	-0.95729	3.91467	0.118478	0.231645	3.91467	0.767023	-0.0166925	3.91467	0.983788	ENSG00000083457
ENSG00000083520	-0.0666854	6.40162	0.934385	-0.161029	6.40162	0.839455	-0.235718	6.40162	0.764703	0.289921	6.40162	0.709109	ENSG00000083520
ENSG00000083535	0.221396	4.83124	0.77743	0.0259908	4.83124	0.973264	0.373697	4.83124	0.625126	1.67747	4.83124	6.27e-05	ENSG00000083535
ENSG00000083544	0.051009	4.02626	0.948254	-0.641262	4.02626	0.365027	0.15584	4.02626	0.84295	0.973027	4.02626	0.100912	ENSG00000083544
ENSG00000083635	0.414047	4.42321	0.585038	0.284916	4.42321	0.714097	0.246872	4.42321	0.751894	1.63515	4.42321	4.37e-05	ENSG00000083635
ENSG00000083642	-0.0287691	7.13677	0.972136	-0.26812	7.13677	0.732437	0.201111	7.13677	0.797604	-0.161053	7.13677	0.840254	ENSG00000083642
ENSG00000083720	-0.140056	4.45512	0.860382	-0.385909	4.45512	0.614356	-0.314493	4.45512	0.685906	0.157709	4.45512	0.841486	ENSG00000083720
ENSG00000083750	0.613367	2.96357	0.394145	0.631019	2.96357	0.378818	-0.325495	2.96357	0.673536	0.155498	2.96357	0.845044	ENSG00000083750
ENSG00000083799	1.35622	6.90743	0.000838176	2.2579	6.90743	3.59e-16	0.434075	6.90743	0.571927	3.22556	6.90743	6.04e-24	ENSG00000083799
ENSG00000083812	-0.0966562	2.56366	0.903295	-0.32408	2.56366	0.679306	0.11008	2.56366	0.889133	0.17664	2.56366	0.82577	ENSG00000083812
ENSG00000083844	-0.632257	4.19702	0.371248	-0.491788	4.19702	0.508705	-0.367488	4.19702	0.632985	-0.112774	4.19702	0.887582	ENSG00000083844
ENSG00000083845	-0.156326	8.86515	0.844637	-0.0258972	8.86515	0.975105	0.338631	8.86515	0.660911	0.666277	8.86515	0.333565	ENSG00000083845
ENSG00000083896	0.105395	7.52568	0.894645	0.0049789	7.52568	0.994436	-0.314629	7.52568	0.686352	1.25821	7.52568	0.00323304	ENSG00000083896
ENSG00000083937	-0.217382	5.68464	0.783002	-0.360581	5.68464	0.640222	0.225893	5.68464	0.772912	1.17086	5.68464	0.0141343	ENSG00000083937
ENSG00000084070	0.372605	4.11825	0.626661	0.622709	4.11825	0.379014	0.00618427	4.11825	0.993285	-1.61292	4.11825	0.00173623	ENSG00000084070
ENSG00000084072	-0.258972	5.47505	0.741686	-0.435039	5.47505	0.56587	-0.29341	5.47505	0.707386	-0.615806	5.47505	0.386519	ENSG00000084072
ENSG00000084073	-0.0164493	6.38215	0.984377	0.0239761	6.38215	0.975843	0.0658543	6.38215	0.934432	0.0514926	6.38215	0.948632	ENSG00000084073
ENSG00000084090	-0.618411	6.89194	0.382468	-0.351952	6.89194	0.649366	-0.126319	6.89194	0.874526	-0.79839	6.89194	0.212499	ENSG00000084090
ENSG00000084092	-0.106127	4.69013	0.894179	0.114051	4.69013	0.885337	0.21729	4.69013	0.781524	2.07741	4.69013	5.79e-10	ENSG00000084092
ENSG00000084093	0.256623	7.36163	0.742132	0.299346	7.36163	0.699675	0.170544	7.36163	0.828418	-0.139169	7.36163	0.861484	ENSG00000084093
ENSG00000084112	0.763143	7.33535	0.241326	0.751994	7.33535	0.251738	-0.249816	7.33535	0.75064	0.408105	7.33535	0.592527	ENSG00000084112
ENSG00000084207	-0.271848	9.86516	0.730268	-0.398215	9.86516	0.604269	-0.345813	9.86516	0.656482	0.0969696	9.86516	0.900984	ENSG00000084207
ENSG00000084234	0.0913863	9.24816	0.90765	0.177708	9.24816	0.820982	-0.0308763	9.24816	0.970247	-0.199338	9.24816	0.801261	ENSG00000084234
ENSG00000084444	-0.429101	2.10657	0.575007	-0.954863	2.10657	0.176664	0.371654	2.10657	0.627935	-0.184104	2.10657	0.814109	ENSG00000084444
ENSG00000084463	0.355713	7.86116	0.644822	0.399094	7.86116	0.603228	-0.115295	7.86116	0.886113	0.414157	7.86116	0.588358	ENSG00000084463
ENSG00000084623	0.401632	7.4903	0.599645	0.597247	7.4903	0.401391	0.633451	7.4903	0.365543	0.424748	7.4903	0.576552	ENSG00000084623
ENSG00000084636	3.79061	1.68122	2.4e-08	3.70083	1.68122	6.6e-08	1.95983	1.68122	0.00801599	2.16262	1.68122	0.0059008	ENSG00000084636
ENSG00000084652	0.0659314	6.64079	0.933921	0.101276	6.64079	0.898568	-0.171497	6.64079	0.828965	-0.54134	6.64079	0.459006	ENSG00000084652
ENSG00000084676	-0.253102	4.67062	0.747229	-0.23936	4.67062	0.760925	-0.456464	4.67062	0.543911	-0.334452	4.67062	0.665584	ENSG00000084676
ENSG00000084693	-0.406709	4.4579	0.594768	-0.739094	4.4579	0.28396	0.191737	4.4579	0.806707	-0.0849992	4.4579	0.915714	ENSG00000084693
ENSG00000084710	1.0253	4.26769	0.0918648	0.730362	4.26769	0.290971	-0.181177	4.26769	0.819956	-1.1483	4.26769	0.0723216	ENSG00000084710
ENSG00000084731	-0.279398	3.52046	0.720277	-0.314259	3.52046	0.685253	0.170534	3.52046	0.828215	-0.205362	3.52046	0.794046	ENSG00000084731
ENSG00000084733	0.341249	7.61233	0.658471	0.520918	7.61233	0.478007	0.200598	7.61233	0.798109	-0.155126	7.61233	0.845421	ENSG00000084733
ENSG00000084754	-0.0230477	7.93486	0.977914	-0.136953	7.93486	0.864051	-0.259149	7.93486	0.741395	-0.438274	7.93486	0.564743	ENSG00000084754
ENSG00000084774	-0.828071	5.74065	0.195901	-0.949316	5.74065	0.111398	-0.629582	5.74065	0.373988	-0.929849	5.74065	0.125058	ENSG00000084774
ENSG00000085063	0.115435	10.8673	0.884355	0.0638802	10.8673	0.935947	0.250019	10.8673	0.748673	-0.352694	10.8673	0.649087	ENSG00000085063
ENSG00000085117	0.53176	7.68612	0.467673	1.19928	7.68612	0.0163528	0.665773	7.68612	0.337146	0.315322	7.68612	0.683387	ENSG00000085117
ENSG00000085185	-0.32151	4.26788	0.678819	-0.543695	4.26788	0.457318	0.0120283	4.26788	0.9871	-1.2002	4.26788	0.0281906	ENSG00000085185
ENSG00000085224	-0.104218	7.9557	0.897566	-0.271467	7.9557	0.729166	0.141263	7.9557	0.859061	-0.760683	7.9557	0.245147	ENSG00000085224
ENSG00000085231	-0.240282	6.17459	0.76074	-0.375809	6.17459	0.625457	-0.287012	6.17459	0.714128	1.0849	6.17459	0.042507	ENSG00000085231
ENSG00000085274	0.120236	3.57522	0.878824	0.322824	3.57522	0.676361	0.204075	3.57522	0.794451	-0.333376	3.57522	0.666568	ENSG00000085274
ENSG00000085276	0.186162	5.5423	0.812747	0.363999	5.5423	0.63533	0.658625	5.5423	0.341798	-0.154214	5.5423	0.846092	ENSG00000085276
ENSG00000085365	-0.0673443	6.76639	0.933966	0.4365	6.76639	0.565927	0.0793131	6.76639	0.921001	-0.868321	6.76639	0.15385	ENSG00000085365
ENSG00000085377	-0.160633	4.24337	0.839691	-0.16792	4.24337	0.832312	0.211684	4.24337	0.787055	-0.602501	4.24337	0.400899	ENSG00000085377
ENSG00000085382	0.227467	3.4223	0.771604	0.177739	3.4223	0.82165	0.765237	3.4223	0.258366	0.451865	3.4223	0.550293	ENSG00000085382
ENSG00000085415	0.109321	5.0792	0.889609	-0.327707	5.0792	0.672822	-0.133406	5.0792	0.867281	1.10083	5.0792	0.0369057	ENSG00000085415
ENSG00000085433	-0.48941	4.24906	0.510875	-0.617236	4.24906	0.386176	-0.172747	4.24906	0.827682	1.34324	4.24906	0.00369999	ENSG00000085433
ENSG00000085449	0.587314	6.16542	0.411532	1.20638	6.16542	0.0082442	-0.0804969	6.16542	0.920421	-0.449877	6.16542	0.551014	ENSG00000085449
ENSG00000085491	-0.411784	6.40289	0.591844	-0.371191	6.40289	0.631291	-0.133724	6.40289	0.867441	-0.279901	6.40289	0.720698	ENSG00000085491
ENSG00000085511	-0.424095	4.17301	0.57617	-0.853547	4.17301	0.18163	-0.302851	4.17301	0.697591	-0.671371	4.17301	0.33609	ENSG00000085511
ENSG00000085514	0.340892	1.17928	0.690113	-0.73717	1.17928	0.416879	-0.219831	1.17928	0.792256	3.49525	1.17928	2.65e-08	ENSG00000085514
ENSG00000085563	-0.146135	8.03813	0.855091	-0.389876	8.03813	0.614295	-0.410666	8.03813	0.594224	0.00055265	8.03813	0.998929	ENSG00000085563
ENSG00000085644	-0.0387005	2.1272	0.960369	-0.821799	2.1272	0.260837	-0.492564	2.1272	0.514853	1.94705	2.1272	7.13e-05	ENSG00000085644
ENSG00000085662	-0.673477	8.93227	0.338337	0.0239288	8.93227	0.97392	1.364	8.93227	0.00665344	0.297283	8.93227	0.700861	ENSG00000085662
ENSG00000085719	-0.253762	6.01349	0.746739	-0.264551	6.01349	0.735981	0.0354279	6.01349	0.963722	-0.243233	6.01349	0.757204	ENSG00000085719
ENSG00000085721	0.138602	6.30171	0.860153	0.103464	6.30171	0.895368	-0.0928881	6.30171	0.908108	1.33486	6.30171	0.00292194	ENSG00000085721
ENSG00000085733	0.305242	7.27618	0.693818	0.485999	7.27618	0.515124	-0.139358	7.27618	0.862281	-0.11301	7.27618	0.888832	ENSG00000085733
ENSG00000085760	0.21	6.54028	0.788764	-0.0214378	6.54028	0.979397	-0.284935	6.54028	0.715717	0.233895	6.54028	0.764936	ENSG00000085760
ENSG00000085788	-0.413629	4.03062	0.5866	-0.452292	4.03062	0.547975	-0.20636	4.03062	0.794105	-0.448441	4.03062	0.551753	ENSG00000085788
ENSG00000085831	2.3706	2.71055	0.000152356	4.05452	2.71055	2.96e-11	1.54416	2.71055	0.0239175	2.9313	2.71055	2.81e-06	ENSG00000085831
ENSG00000085832	0.252106	6.69964	0.746694	0.42853	6.69964	0.574694	0.0931075	6.69964	0.907471	-0.169085	6.69964	0.83133	ENSG00000085832
ENSG00000085840	-0.119691	3.9315	0.880587	-0.230162	3.9315	0.769718	0.00353754	3.9315	0.995801	0.623245	3.9315	0.379686	ENSG00000085840
ENSG00000085871	-0.647315	5.40671	0.355433	-1.03679	5.40671	0.0621961	0.443018	5.40671	0.556229	-0.460259	5.40671	0.540446	ENSG00000085871
ENSG00000085872	-0.311788	5.3233	0.688902	-0.291261	5.3233	0.709326	-0.217369	5.3233	0.783131	0.0286149	5.3233	0.970589	ENSG00000085872
ENSG00000085978	-0.0849333	3.84976	0.915457	-0.218144	3.84976	0.781771	-0.042666	3.84976	0.95804	0.0533267	3.84976	0.946329	ENSG00000085978
ENSG00000085982	0.731961	6.12195	0.27105	1.11703	6.12195	0.0229802	-0.0864326	6.12195	0.914793	0.121846	6.12195	0.878101	ENSG00000085982
ENSG00000085998	0.595369	3.77848	0.406392	0.882068	3.77848	0.160928	0.414709	3.77848	0.583895	-0.497199	3.77848	0.504191	ENSG00000085998
ENSG00000086015	-0.832898	5.04663	0.198999	-0.666556	5.04663	0.341811	-0.502534	5.04663	0.499521	-1.44332	5.04663	0.00464663	ENSG00000086015
ENSG00000086061	1.01931	8.6634	0.0538173	1.41821	8.6634	0.000183093	-0.0493821	8.6634	0.952001	1.48946	8.6634	3.76e-05	ENSG00000086061
ENSG00000086062	1.37661	9.46796	0.000789749	1.77682	9.46796	5.37e-07	0.846105	9.46796	0.169757	0.840465	9.46796	0.174603	ENSG00000086062
ENSG00000086065	0.0776523	7.61107	0.921166	0.158121	7.61107	0.84056	-0.211706	7.61107	0.789174	1.47797	7.61107	0.00030741	ENSG00000086065
ENSG00000086102	0.398125	6.81023	0.604444	0.302939	6.81023	0.696142	0.0625081	6.81023	0.93778	1.00715	6.81023	0.0602646	ENSG00000086102
ENSG00000086189	-0.567034	5.67384	0.433411	-0.644657	5.67384	0.35682	0.10485	5.67384	0.895123	-0.978981	5.67384	0.084729	ENSG00000086189
ENSG00000086200	0.119349	4.22368	0.879878	-0.0393427	4.22368	0.961198	-0.0783314	4.22368	0.922304	-0.641982	4.22368	0.363815	ENSG00000086200
ENSG00000086232	-0.260175	7.12821	0.740338	-0.359505	7.12821	0.643442	-0.0919225	7.12821	0.910501	-0.34891	7.12821	0.65252	ENSG00000086232
ENSG00000086300	1.13727	0.228114	0.329322	-0.0311835	0.228114	0.975893	-2.02061	0.228114	0.147767	6.17817	0.228114	1.24e-11	ENSG00000086300
ENSG00000086475	-0.603092	4.42041	0.398859	-1.12609	4.42041	0.0390376	-0.0894553	4.42041	0.911286	-0.265462	4.42041	0.73483	ENSG00000086475
ENSG00000086504	-0.377369	4.55646	0.624214	-0.158599	4.55646	0.842511	-0.347949	4.55646	0.653553	-3.03492	4.55646	1.53e-07	ENSG00000086504
ENSG00000086544	-0.216838	3.63554	0.782423	-0.185914	3.63554	0.81327	0.956318	3.63554	0.114334	0.61534	3.63554	0.390193	ENSG00000086544
ENSG00000086589	-0.030049	6.39161	0.970896	0.257423	6.39161	0.741425	-0.363171	6.39161	0.639536	0.221916	6.39161	0.776938	ENSG00000086589
ENSG00000086598	0.0566747	5.56735	0.942704	0.0175912	5.56735	0.981762	0.163819	5.56735	0.835118	0.0688913	5.56735	0.930524	ENSG00000086598
ENSG00000086619	-0.151967	4.27554	0.848132	0.529575	4.27554	0.469918	0.362862	4.27554	0.636245	0.156633	4.27554	0.842724	ENSG00000086619
ENSG00000086666	-0.28089	6.23158	0.719719	-0.0965382	6.23158	0.904442	0.202645	6.23158	0.796121	0.340517	6.23158	0.659197	ENSG00000086666
ENSG00000086712	0.463273	6.16911	0.536569	0.501429	6.16911	0.497735	0.29417	6.16911	0.704828	2.23259	6.16911	8.1e-12	ENSG00000086712
ENSG00000086730	-0.160487	1.75181	0.844778	-0.761884	1.75181	0.376627	0.718609	1.75181	0.352796	3.37778	1.75181	2.2e-08	ENSG00000086730
ENSG00000086758	0.0222615	7.72554	0.977092	-0.0192081	7.72554	0.98173	-0.612289	7.72554	0.388182	0.0803802	7.72554	0.919188	ENSG00000086758
ENSG00000086827	-0.146781	6.06019	0.853765	-0.249738	6.06019	0.750753	-0.334117	6.06019	0.66685	0.677794	6.06019	0.32279	ENSG00000086827
ENSG00000086848	-0.397927	2.26841	0.604156	-1.03601	2.26841	0.131697	-0.297453	2.26841	0.702574	-0.476248	2.26841	0.532652	ENSG00000086848
ENSG00000087008	-0.481912	3.16732	0.519373	-0.602998	3.16732	0.403834	-0.177806	3.16732	0.822659	-1.74873	3.16732	0.00146972	ENSG00000087008
ENSG00000087053	0.300784	5.7767	0.698261	0.311231	5.7767	0.687883	0.194637	5.7767	0.804183	0.357543	5.7767	0.642954	ENSG00000087053
ENSG00000087074	1.15575	7.4264	0.0140869	1.46267	7.4264	0.000137743	-0.388638	7.4264	0.612674	3.55712	7.4264	3.56e-20	ENSG00000087074
ENSG00000087076	-0.400474	2.53756	0.604181	-0.499942	2.53756	0.513035	0.719242	2.53756	0.309089	0.800961	2.53756	0.254884	ENSG00000087076
ENSG00000087077	0.309134	5.60042	0.689937	0.218642	5.60042	0.780267	0.322465	5.60042	0.676635	-0.54974	5.60042	0.450635	ENSG00000087077
ENSG00000087086	0.222861	10.5012	0.775792	0.195845	10.5012	0.802833	-0.0718348	10.5012	0.929317	-0.216277	10.5012	0.784371	ENSG00000087086
ENSG00000087087	0.201334	7.6347	0.797386	0.195539	7.6347	0.803206	-0.0240404	7.6347	0.976921	1.10358	7.6347	0.0240843	ENSG00000087087
ENSG00000087088	0.100366	3.46312	0.898605	-0.548217	3.46312	0.469701	-0.173013	3.46312	0.828712	-0.221663	3.46312	0.780214	ENSG00000087088
ENSG00000087095	0.442387	5.42325	0.557967	0.195064	5.42325	0.803856	0.409502	5.42325	0.591064	-0.746106	5.42325	0.262616	ENSG00000087095
ENSG00000087111	-0.259224	6.16866	0.741318	-0.596935	6.16866	0.403561	-0.227902	6.16866	0.772539	-1.3081	6.16866	0.00322774	ENSG00000087111
ENSG00000087152	0.119122	5.4093	0.879951	0.370087	5.4093	0.629323	-0.0929402	5.4093	0.907788	-0.756104	5.4093	0.253363	ENSG00000087152
ENSG00000087157	0.0909719	3.17619	0.908444	-0.0838477	3.17619	0.915605	0.892937	3.17619	0.159987	0.167505	3.17619	0.832329	ENSG00000087157
ENSG00000087191	-0.0394029	6.96911	0.961676	-0.131573	6.96911	0.869387	-0.119428	6.96911	0.881743	-1.06086	6.96911	0.0407945	ENSG00000087191
ENSG00000087206	0.335661	5.97313	0.663885	0.485668	5.97313	0.514161	0.161616	5.97313	0.8376	0.750868	5.97313	0.254087	ENSG00000087206
ENSG00000087237	0.611799	2.66038	0.430196	0.6986	2.66038	0.36367	2.21351	2.66038	0.000107262	1.82385	2.66038	0.00359332	ENSG00000087237
ENSG00000087253	-0.895919	3.799	0.163176	-0.787361	3.799	0.242284	0.954003	3.799	0.110781	0.315697	3.799	0.683588	ENSG00000087253
ENSG00000087263	-0.103847	7.77586	0.897454	0.230464	7.77586	0.768016	-0.641706	7.77586	0.362325	-0.4719	7.77586	0.529778	ENSG00000087263
ENSG00000087266	0.128207	4.99864	0.871502	0.37499	4.99864	0.625694	0.169588	4.99864	0.829494	-1.55374	4.99864	0.000498707	ENSG00000087266
ENSG00000087269	0.609149	6.23932	0.389768	0.314646	6.23932	0.684509	-0.0524155	6.23932	0.948809	-0.186991	6.23932	0.813381	ENSG00000087269
ENSG00000087274	-0.309153	6.57862	0.691704	-0.0655719	6.57862	0.9361	-0.0592981	6.57862	0.94225	-0.824317	6.57862	0.189141	ENSG00000087274
ENSG00000087299	-0.432788	4.34436	0.567573	-0.315828	4.34436	0.684515	-0.301319	4.34436	0.699215	-1.86658	4.34436	3.03e-05	ENSG00000087299
ENSG00000087301	-0.473236	5.3838	0.527327	-0.688617	5.3838	0.315602	0.0783838	5.3838	0.920707	0.194394	5.3838	0.804626	ENSG00000087301
ENSG00000087302	-0.0101799	7.17362	0.990719	-0.0721628	7.17362	0.929357	0.0118764	7.17362	0.987769	-0.111984	7.17362	0.889502	ENSG00000087302
ENSG00000087338	-0.584118	5.60653	0.416427	-1.01322	5.60653	0.0661461	-0.0539568	5.60653	0.947114	-1.10315	5.60653	0.0346858	ENSG00000087338
ENSG00000087365	0.215447	8.68493	0.783214	0.253592	8.68493	0.745114	-0.160732	8.68493	0.840493	0.200856	8.68493	0.797846	ENSG00000087365
ENSG00000087448	-0.431563	5.10364	0.569844	-0.487088	5.10364	0.513317	-0.242111	5.10364	0.758406	0.456132	5.10364	0.544246	ENSG00000087448
ENSG00000087460	0.304778	8.95284	0.693433	0.410679	8.95284	0.589329	1.05994	8.95284	0.0856036	1.008	8.95284	0.109535	ENSG00000087460
ENSG00000087470	-0.00853277	7.5928	0.99239	0.074742	7.5928	0.925232	-0.241323	7.5928	0.759119	0.247114	7.5928	0.751615	ENSG00000087470
ENSG00000087502	-0.000779198	5.84684	1.00017	-0.0502684	5.84684	0.95061	0.28728	5.84684	0.711519	-0.73849	5.84684	0.270708	ENSG00000087502
ENSG00000087586	-0.200579	6.87495	0.799805	-0.412779	6.87495	0.590943	-0.263505	6.87495	0.737017	0.142142	6.87495	0.857821	ENSG00000087586
ENSG00000087842	-0.405159	4.57376	0.595401	-0.0450464	4.57376	0.955668	0.240233	4.57376	0.758416	-0.491762	4.57376	0.509362	ENSG00000087842
ENSG00000087884	-0.696385	5.58461	0.31682	-1.07911	5.58461	0.0651077	-0.828869	5.58461	0.205429	-0.69164	5.58461	0.32222	ENSG00000087884
ENSG00000087903	-0.526889	4.25018	0.473827	-0.640429	4.25018	0.36419	0.486994	4.25018	0.511902	0.563591	4.25018	0.436499	ENSG00000087903
ENSG00000087995	0.131801	5.10471	0.867986	0.00762476	5.10471	0.992	-0.220367	5.10471	0.780111	-0.220104	5.10471	0.780209	ENSG00000087995
ENSG00000088035	-0.136735	3.57437	0.863408	-0.37982	3.57437	0.61986	0.162411	3.57437	0.836326	-0.437549	3.57437	0.562548	ENSG00000088035
ENSG00000088038	0.310258	4.30894	0.688503	0.197235	4.30894	0.80159	-0.206474	4.30894	0.794145	0.22596	4.30894	0.773098	ENSG00000088038
ENSG00000088179	-0.583711	4.06321	0.418347	-1.14409	4.06321	0.0394359	-0.162415	4.06321	0.83818	-1.4051	4.06321	0.00640921	ENSG00000088179
ENSG00000088205	0.290888	7.65663	0.70804	-0.0368797	7.65663	0.964249	0.123973	7.65663	0.876438	-0.0732162	7.65663	0.928296	ENSG00000088205
ENSG00000088247	-0.399751	9.25381	0.601949	-0.392181	9.25381	0.609511	-0.142057	9.25381	0.859115	-0.161572	9.25381	0.839561	ENSG00000088247
ENSG00000088256	-0.439348	6.10347	0.561812	-0.140752	6.10347	0.860047	-0.216354	6.10347	0.784371	-0.18352	6.10347	0.817157	ENSG00000088256
ENSG00000088280	-0.445347	2.60257	0.556678	-0.856315	2.60257	0.212732	-0.072256	2.60257	0.928236	-1.2288	2.60257	0.0598381	ENSG00000088280
ENSG00000088298	-0.69021	2.92355	0.328891	-0.843191	2.92355	0.212986	-0.526786	2.92355	0.47639	-0.434705	2.92355	0.566711	ENSG00000088298
ENSG00000088305	-0.19272	2.3917	0.807785	-0.63561	2.3917	0.391496	-0.689104	2.3917	0.342001	-1.47238	2.3917	0.0312675	ENSG00000088305
ENSG00000088325	-0.408431	8.30774	0.595774	-0.569314	8.30774	0.431016	-0.366736	8.30774	0.635998	-0.968119	8.30774	0.08155	ENSG00000088325
ENSG00000088356	-0.0329199	5.93709	0.967931	0.0574286	5.93709	0.942771	-0.16139	5.93709	0.839051	2.32571	5.93709	7.19e-15	ENSG00000088356
ENSG00000088367	-0.503419	7.29203	0.497282	-0.705381	7.29203	0.297389	-0.44818	7.29203	0.554054	-1.16782	7.29203	0.0133379	ENSG00000088367
ENSG00000088387	-0.409096	5.16153	0.592139	-0.402019	5.16153	0.59912	-0.059632	5.16153	0.941219	-0.535015	5.16153	0.465427	ENSG00000088387
ENSG00000088448	-0.219772	4.73822	0.780467	0.13047	4.73822	0.868926	0.0373572	4.73822	0.962251	1.23306	4.73822	0.0102743	ENSG00000088448
ENSG00000088538	0.0810748	2.09607	0.920228	-0.674921	2.09607	0.382752	-0.360563	2.09607	0.646006	1.49641	2.09607	0.0140929	ENSG00000088538
ENSG00000088682	-0.0554614	3.3997	0.944937	-0.526312	3.3997	0.476062	-0.0425272	3.3997	0.95823	-0.603214	3.3997	0.405057	ENSG00000088682
ENSG00000088726	1.36248	2.06956	0.0253102	1.01202	2.06956	0.135192	-0.468469	2.06956	0.544033	-0.70397	2.06956	0.373393	ENSG00000088726
ENSG00000088727	-0.281232	2.54289	0.718247	-0.384438	2.54289	0.616385	-0.184745	2.54289	0.814921	0.894674	2.54289	0.174885	ENSG00000088727
ENSG00000088766	-0.173585	3.96635	0.827383	-0.879964	3.96635	0.192553	-0.00655997	3.96635	0.994887	0.565821	3.96635	0.440758	ENSG00000088766
ENSG00000088808	-0.568438	3.06698	0.436714	-0.181818	3.06698	0.817944	-0.210336	3.06698	0.7898	-0.159523	3.06698	0.839938	ENSG00000088808
ENSG00000088812	-0.245918	4.35232	0.754522	-0.675022	4.35232	0.33068	-0.239761	4.35232	0.760761	-1.06962	4.35232	0.0625467	ENSG00000088812
ENSG00000088826	1.69638	3.67798	0.000229402	2.43887	3.67798	4.33e-10	0.481767	3.67798	0.518473	1.78848	3.67798	0.000104724	ENSG00000088826
ENSG00000088832	0.175249	8.68275	0.823384	0.316223	8.68275	0.68268	0.0289944	8.68275	0.969863	0.260245	8.68275	0.738379	ENSG00000088832
ENSG00000088833	0.697501	7.04854	0.30499	1.06418	7.04854	0.0360899	0.384526	7.04854	0.619188	-0.104641	7.04854	0.89721	ENSG00000088833
ENSG00000088836	-0.501338	2.5139	0.511541	-0.790014	2.5139	0.279597	-0.225556	2.5139	0.775881	-0.723395	2.5139	0.334804	ENSG00000088836
ENSG00000088854	-0.0418857	3.13114	0.958319	0.122739	3.13114	0.876532	0.140212	3.13114	0.858599	-0.404902	3.13114	0.595199	ENSG00000088854
ENSG00000088876	-0.315616	3.03503	0.683966	-0.684716	3.03503	0.334083	-0.3029	3.03503	0.696902	0.795616	3.03503	0.235122	ENSG00000088876
ENSG00000088888	-0.138249	6.38068	0.862693	-0.201416	6.38068	0.798992	0.0596996	6.38068	0.940457	-1.80463	6.38068	2.3e-07	ENSG00000088888
ENSG00000088899	-0.424203	3.45789	0.576228	-0.142013	3.45789	0.857997	-0.215384	3.45789	0.78484	0.317365	3.45789	0.681854	ENSG00000088899
ENSG00000088930	0.386514	8.1627	0.614501	0.294495	8.1627	0.70446	0.184757	8.1627	0.813992	0.404641	8.1627	0.596622	ENSG00000088930
ENSG00000088970	-0.21216	2.64542	0.786822	-0.931254	2.64542	0.176609	0.42719	2.64542	0.572428	0.2542	2.64542	0.746286	ENSG00000088970
ENSG00000088986	0.183116	7.57359	0.815864	0.284216	7.57359	0.714673	-0.000546036	7.57359	1.00037	-0.357019	7.57359	0.645026	ENSG00000088986
ENSG00000089006	-0.151843	6.81949	0.849573	-0.360609	6.81949	0.642021	-0.0892074	6.81949	0.91282	0.0927561	6.81949	0.908312	ENSG00000089006
ENSG00000089009	0.065471	7.26139	0.934005	0.246468	7.26139	0.752263	0.18213	7.26139	0.816646	0.704673	7.26139	0.296588	ENSG00000089009
ENSG00000089022	0.101526	4.13053	0.897564	-0.240618	4.13053	0.759512	-0.278783	4.13053	0.721572	0.03585	4.13053	0.963646	ENSG00000089022
ENSG00000089041	1.54983	4.38908	0.000674849	2.82385	4.38908	4.7e-12	-0.275601	4.38908	0.723563	-0.0193668	4.38908	0.979584	ENSG00000089041
ENSG00000089048	0.389658	7.63616	0.611191	0.202672	7.63616	0.796058	-0.00557169	7.63616	0.995343	1.20885	7.63616	0.00673898	ENSG00000089048
ENSG00000089050	0.232498	3.29359	0.766281	0.238167	3.29359	0.760769	0.593197	3.29359	0.409341	-0.0335462	3.29359	0.965862	ENSG00000089050
ENSG00000089053	-0.462441	6.54118	0.539015	-0.626212	6.54118	0.374513	-0.212099	6.54118	0.788289	-0.76823	6.54118	0.238783	ENSG00000089053
ENSG00000089057	-0.0123031	2.5956	0.98801	-0.704472	2.5956	0.32645	0.32008	2.5956	0.678225	0.16743	2.5956	0.832333	ENSG00000089057
ENSG00000089060	0.134747	5.58695	0.865263	0.430627	5.58695	0.57171	0.605023	5.58695	0.394048	-0.393811	5.58695	0.608115	ENSG00000089060
ENSG00000089063	-0.258258	5.06893	0.742844	-0.245528	5.06893	0.755507	0.346759	5.06893	0.651883	-0.40158	5.06893	0.599894	ENSG00000089063
ENSG00000089091	0.218228	2.23718	0.782314	-0.631868	2.23718	0.403443	-0.543029	2.23718	0.470711	2.73691	2.23718	1.5e-08	ENSG00000089091
ENSG00000089094	-0.533189	4.96471	0.46733	-0.482625	4.96471	0.517858	-0.481792	4.96471	0.518767	-1.01895	4.96471	0.072386	ENSG00000089094
ENSG00000089123	-0.300415	2.17406	0.70127	-0.128322	2.17406	0.871495	-0.7305	2.17406	0.313011	-1.02487	2.17406	0.158128	ENSG00000089123
ENSG00000089127	1.40056	8.16149	0.00291889	1.96402	8.16149	1.39e-06	0.0472259	8.16149	0.951129	1.79568	8.16149	1.79e-05	ENSG00000089127
ENSG00000089154	-0.133245	6.80642	0.867632	-0.27391	6.80642	0.726683	-0.356509	6.80642	0.645212	-1.02808	6.80642	0.0541803	ENSG00000089154
ENSG00000089157	-0.415004	10.1557	0.588043	-0.494257	10.1557	0.506757	0.0611987	10.1557	0.938618	0.144037	10.1557	0.855436	ENSG00000089157
ENSG00000089159	0.0622106	2.91977	0.937069	0.340516	2.91977	0.658451	-0.277124	2.91977	0.722654	-0.600508	2.91977	0.412771	ENSG00000089159
ENSG00000089177	0.100712	3.24296	0.898505	-0.244416	3.24296	0.7548	0.037893	3.24296	0.961351	-1.35459	3.24296	0.0263383	ENSG00000089177
ENSG00000089195	0.351595	5.70945	0.648458	0.463191	5.70945	0.537413	0.15233	5.70945	0.847063	1.46893	5.70945	0.000139345	ENSG00000089195
ENSG00000089220	-0.357566	9.61942	0.644057	-0.55332	9.61942	0.448287	-0.0599944	9.61942	0.941314	0.0176657	9.61942	0.981012	ENSG00000089220
ENSG00000089234	0.312527	5.10943	0.686575	0.333288	5.10943	0.666032	0.250685	5.10943	0.748169	1.02034	5.10943	0.0638564	ENSG00000089234
ENSG00000089248	-0.35473	8.13524	0.646743	-0.507902	8.13524	0.49308	-0.165446	8.13524	0.835331	-0.11933	8.13524	0.881626	ENSG00000089248
ENSG00000089280	0.251042	8.60962	0.747656	0.595229	8.60962	0.40341	0.20539	8.60962	0.793284	0.217765	8.60962	0.78092	ENSG00000089280
ENSG00000089289	-0.0798194	5.82056	0.921945	-0.0852465	5.82056	0.916549	0.206494	5.82056	0.792312	0.385377	5.82056	0.618513	ENSG00000089289
ENSG00000089327	0.161412	4.57347	0.837549	-0.17424	4.57347	0.82595	0.0862515	4.57347	0.91273	0.762001	4.57347	0.24992	ENSG00000089327
ENSG00000089335	0.18544	4.33866	0.813374	0.270636	4.33866	0.728333	0.441849	4.33866	0.557687	1.20899	4.33866	0.0285111	ENSG00000089335
ENSG00000089351	0.195126	5.92369	0.80337	0.679364	5.92369	0.327199	0.960244	5.92369	0.107597	-0.0862715	5.92369	0.914817	ENSG00000089351
ENSG00000089486	0.0858277	2.18187	0.914315	-0.699907	2.18187	0.355476	-0.495713	2.18187	0.518809	-0.304368	2.18187	0.701261	ENSG00000089486
ENSG00000089597	-0.679649	8.48484	0.347596	-0.671182	8.48484	0.354922	-1.10841	8.48484	0.0793437	-0.683734	8.48484	0.344411	ENSG00000089597
ENSG00000089639	-0.431929	3.26348	0.568416	-0.350226	3.26348	0.649565	-0.0754744	3.26348	0.925205	-1.37105	3.26348	0.017975	ENSG00000089639
ENSG00000089682	-0.237629	4.79325	0.762823	-0.642632	4.79325	0.360021	-0.067352	4.79325	0.93338	-1.2179	4.79325	0.0190017	ENSG00000089682
ENSG00000089685	-0.573203	6.70937	0.427051	-0.765164	6.70937	0.241086	-0.320363	6.70937	0.680644	-0.297262	6.70937	0.703506	ENSG00000089685
ENSG00000089693	0.26425	6.6878	0.734362	0.467942	6.6878	0.531194	0.191291	6.6878	0.807243	0.42924	6.6878	0.569851	ENSG00000089693
ENSG00000089737	0.1892	8.21639	0.810772	0.100271	8.21639	0.901762	0.0772166	8.21639	0.924028	1.04818	8.21639	0.0415413	ENSG00000089737
ENSG00000089775	-0.0879108	3.11802	0.912053	-0.899904	3.11802	0.177803	0.642818	3.11802	0.363331	-0.0848776	3.11802	0.914327	ENSG00000089775
ENSG00000089818	0.248827	4.02564	0.751464	0.362634	4.02564	0.640499	0.435734	4.02564	0.568584	-0.666487	4.02564	0.379441	ENSG00000089818
ENSG00000089820	-0.797048	5.2523	0.263684	-1.1704	5.2523	0.0741837	-0.143411	5.2523	0.860297	-0.712416	5.2523	0.330769	ENSG00000089820
ENSG00000089876	0.311075	3.04514	0.688238	-0.239302	3.04514	0.759821	0.518723	3.04514	0.483392	0.0167164	3.04514	0.984135	ENSG00000089876
ENSG00000089902	0.439773	5.02005	0.559588	0.13226	5.02005	0.866799	-0.189968	5.02005	0.810495	-0.88305	5.02005	0.154059	ENSG00000089902
ENSG00000089916	0.173724	5.59965	0.825243	0.421742	5.59965	0.578763	-0.177084	5.59965	0.82335	0.285014	5.59965	0.714074	ENSG00000089916
ENSG00000090006	-0.754569	3.22296	0.287658	-0.0701049	3.22296	0.930178	0.502889	3.22296	0.499846	-0.263288	3.22296	0.737201	ENSG00000090006
ENSG00000090013	-0.218724	5.30525	0.781731	-0.591956	5.30525	0.409065	-0.27842	5.30525	0.722186	-0.0270762	5.30525	0.973649	ENSG00000090013
ENSG00000090020	0.693907	4.80248	0.309637	0.877977	4.80248	0.152887	0.71513	4.80248	0.289306	0.455609	4.80248	0.543906	ENSG00000090020
ENSG00000090054	0.636424	4.12705	0.366902	0.563804	4.12705	0.437122	-0.00932903	4.12705	0.99133	0.471594	4.12705	0.528338	ENSG00000090054
ENSG00000090060	0.0633393	7.98813	0.937095	0.160691	7.98813	0.839126	0.191534	7.98813	0.807184	0.346007	7.98813	0.654103	ENSG00000090060
ENSG00000090061	0.515404	3.86565	0.48616	1.11695	3.86565	0.0511645	0.173175	3.86565	0.825594	0.430974	3.86565	0.570005	ENSG00000090061
ENSG00000090238	-0.69959	5.15377	0.312174	-1.60706	5.15377	0.00109558	0.412141	5.15377	0.586765	0.0508969	5.15377	0.947892	ENSG00000090238
ENSG00000090263	0.08345	6.1548	0.917419	0.0625559	6.1548	0.938055	-0.165576	6.1548	0.835073	0.536967	6.1548	0.461945	ENSG00000090263
ENSG00000090266	-0.209099	6.88949	0.791275	-0.302092	6.88949	0.698713	-0.201008	6.88949	0.799373	0.0185938	6.88949	0.981155	ENSG00000090266
ENSG00000090273	0.241343	7.20776	0.757367	0.282955	7.20776	0.715946	0.0151318	7.20776	0.984631	-0.0480985	7.20776	0.953167	ENSG00000090273
ENSG00000090316	-0.266104	5.62651	0.73444	-0.245109	5.62651	0.755364	-0.0143575	5.62651	0.986494	-0.775946	5.62651	0.234443	ENSG00000090316
ENSG00000090339	3.02395	5.03196	1.48e-13	3.77626	5.03196	9.03e-18	1.97511	5.03196	1.24e-06	2.11223	5.03196	4.24e-07	ENSG00000090339
ENSG00000090372	0.0744148	4.09492	0.92489	0.386138	4.09492	0.613009	-0.320558	4.09492	0.679531	0.521189	4.09492	0.47859	ENSG00000090372
ENSG00000090376	-0.321872	5.60872	0.678666	0.359472	5.60872	0.640909	0.913872	5.60872	0.119076	0.407506	5.60872	0.593792	ENSG00000090376
ENSG00000090432	-0.330531	5.73624	0.67037	-0.358927	5.73624	0.642081	-0.461775	5.73624	0.539204	-0.00978762	5.73624	0.991031	ENSG00000090432
ENSG00000090447	-0.861562	3.26557	0.192598	-1.68482	3.26557	0.00210546	-0.21575	3.26557	0.784884	-0.389902	3.26557	0.611046	ENSG00000090447
ENSG00000090470	-0.00513147	5.80675	0.995687	-0.207664	5.80675	0.792751	-0.030684	5.80675	0.970262	-0.267041	5.80675	0.733438	ENSG00000090470
ENSG00000090487	0.163014	5.58755	0.835913	-0.165707	5.58755	0.834705	0.413415	5.58755	0.586028	0.594733	5.58755	0.404712	ENSG00000090487
ENSG00000090520	0.460263	7.33789	0.542692	0.511077	7.33789	0.487954	0.0236631	7.33789	0.976245	0.468438	7.33789	0.533831	ENSG00000090520
ENSG00000090530	-0.270649	6.19291	0.729907	-0.314175	6.19291	0.686597	-0.539653	6.19291	0.460669	-0.164142	6.19291	0.836289	ENSG00000090530
ENSG00000090565	-0.707742	4.20433	0.30055	-0.759291	4.20433	0.2555	-0.634786	4.20433	0.368318	-1.48992	4.20433	0.00243358	ENSG00000090565
ENSG00000090581	0.158192	4.93698	0.840776	0.412914	4.93698	0.586526	-0.155831	4.93698	0.844649	0.449446	4.93698	0.549957	ENSG00000090581
ENSG00000090612	0.288335	4.11224	0.71052	-0.0679405	4.11224	0.932482	-0.0968604	4.11224	0.90372	0.441075	4.11224	0.558149	ENSG00000090612
ENSG00000090615	0.0282332	6.47367	0.971425	-0.0555069	6.47367	0.945595	-0.666203	6.47367	0.33531	-0.376675	6.47367	0.625295	ENSG00000090615
ENSG00000090621	-0.147032	7.95472	0.853652	-0.286451	7.95472	0.7143	-0.193021	7.95472	0.807421	0.831371	7.95472	0.180004	ENSG00000090621
ENSG00000090674	0.140591	2.0105	0.859333	-0.150942	2.0105	0.847538	0.166536	2.0105	0.832247	1.15829	2.0105	0.0663209	ENSG00000090674
ENSG00000090686	-0.172205	8.56957	0.828674	-0.205546	8.56957	0.795272	-0.343157	8.56957	0.658301	-0.662466	8.56957	0.340427	ENSG00000090686
ENSG00000090776	1.3343	4.13769	0.00653772	2.0835	4.13769	3.51e-08	0.883184	4.13769	0.158624	1.84562	4.13769	4.06e-06	ENSG00000090776
ENSG00000090857	-0.453656	6.78271	0.54768	-0.54641	6.78271	0.454675	-0.175251	6.78271	0.825584	-0.982356	6.78271	0.0838114	ENSG00000090857
ENSG00000090861	-0.17714	6.79471	0.823299	-0.316658	6.79471	0.684245	-0.423897	6.79471	0.578266	-1.1677	6.79471	0.0151275	ENSG00000090861
ENSG00000090863	-0.0979904	7.2933	0.904247	-0.139622	7.2933	0.862387	-0.164355	7.2933	0.836861	-1.00477	7.2933	0.0638464	ENSG00000090863
ENSG00000090889	-0.231341	7.28147	0.769064	-0.336723	7.28147	0.664431	-0.252932	7.28147	0.747546	-0.612836	7.28147	0.387712	ENSG00000090889
ENSG00000090905	-0.24833	6.88165	0.752119	-0.3112	6.88165	0.689698	-0.203479	6.88165	0.7969	-0.985062	6.88165	0.074368	ENSG00000090905
ENSG00000090924	-0.0657247	3.68168	0.934591	-0.13959	3.68168	0.860312	0.586535	3.68168	0.414298	0.98287	3.68168	0.0998944	ENSG00000090924
ENSG00000090971	-0.903587	4.65794	0.169069	-1.01253	4.65794	0.110804	-0.422543	4.65794	0.580709	-0.560007	4.65794	0.449241	ENSG00000090971
ENSG00000090975	-0.665217	2.44568	0.375699	-0.149337	2.44568	0.851896	-0.746781	2.44568	0.308651	-1.48241	2.44568	0.0414558	ENSG00000090975
ENSG00000090989	0.0976994	6.37551	0.902541	0.0719985	6.37551	0.928193	-0.165664	6.37551	0.834808	0.0779499	6.37551	0.922234	ENSG00000090989
ENSG00000091009	0.341057	4.36466	0.658124	-0.0296614	4.36466	0.970887	0.198717	4.36466	0.800035	0.0330881	4.36466	0.966532	ENSG00000091009
ENSG00000091039	-0.0234442	6.7861	0.977751	-0.185689	6.7861	0.815281	0.0855339	6.7861	0.913173	-0.592733	6.7861	0.40958	ENSG00000091039
ENSG00000091073	-0.185008	4.91795	0.815681	0.48989	4.91795	0.50947	-0.432071	4.91795	0.568887	-0.38564	4.91795	0.614968	ENSG00000091073
ENSG00000091127	0.461301	4.08956	0.537715	0.482737	4.08956	0.516386	-0.0464993	4.08956	0.954128	-0.41149	4.08956	0.588107	ENSG00000091127
ENSG00000091129	0.156229	4.55013	0.84321	0.775566	4.55013	0.263232	1.33701	4.55013	0.0162923	0.170819	4.55013	0.829878	ENSG00000091129
ENSG00000091136	0.5264	7.92378	0.472462	0.484081	7.92378	0.51587	0.162498	7.92378	0.836623	-0.212739	7.92378	0.78768	ENSG00000091136
ENSG00000091137	0.147546	2.41782	0.887817	1.10094	2.41782	0.219503	0.088715	2.41782	0.93076	6.49827	2.41782	1.33e-16	ENSG00000091137
ENSG00000091140	0.0283806	5.75588	0.971671	0.000747232	5.75588	0.998861	-0.17288	5.75588	0.827601	-0.931828	5.75588	0.113245	ENSG00000091140
ENSG00000091157	-0.310719	3.74646	0.689234	-0.622551	3.74646	0.382844	-0.254984	3.74646	0.745268	-0.672388	3.74646	0.338754	ENSG00000091157
ENSG00000091164	0.21098	5.41319	0.787909	0.309186	5.41319	0.689901	0.276679	5.41319	0.722219	0.662262	5.41319	0.338608	ENSG00000091164
ENSG00000091317	-0.291724	6.60071	0.710804	-0.160461	6.60071	0.841752	-0.104101	6.60071	0.898151	-0.487737	6.60071	0.517532	ENSG00000091317
ENSG00000091409	-0.451928	5.55211	0.548928	-0.362513	5.55211	0.638367	-0.622358	5.55211	0.379158	-0.769642	5.55211	0.242092	ENSG00000091409
ENSG00000091428	0.313472	6.78627	0.685664	-0.420202	6.78627	0.582946	-0.0703021	6.78627	0.93106	-1.13062	6.78627	0.0218768	ENSG00000091428
ENSG00000091436	-0.748491	7.78499	0.256347	-0.838424	7.78499	0.175294	-0.163483	7.78499	0.837076	-0.123413	7.78499	0.877743	ENSG00000091436
ENSG00000091483	-0.0753054	5.46808	0.925652	-0.843677	5.46808	0.185673	0.246363	5.46808	0.752268	-0.247478	5.46808	0.753197	ENSG00000091483
ENSG00000091490	-0.234951	6.33839	0.765639	-0.442031	6.33839	0.559064	0.152967	6.33839	0.845849	-0.550876	6.33839	0.449982	ENSG00000091490
ENSG00000091527	0.328178	9.56562	0.671063	0.580879	9.56562	0.417776	-0.0607491	9.56562	0.940538	1.09422	9.56562	0.027389	ENSG00000091527
ENSG00000091542	-0.550288	5.77955	0.450102	-0.678413	5.77955	0.324045	-0.277755	5.77955	0.722885	0.440766	5.77955	0.559929	ENSG00000091542
ENSG00000091592	-0.268347	4.49026	0.732085	-0.623296	4.49026	0.379358	-0.267772	4.49026	0.732736	-0.581876	4.49026	0.419871	ENSG00000091592
ENSG00000091640	0.267312	7.34831	0.731055	0.339392	7.34831	0.659167	-0.224598	7.34831	0.776972	0.442606	7.34831	0.55644	ENSG00000091640
ENSG00000091651	-0.0344402	5.57848	0.966317	-0.0464879	5.57848	0.954258	-0.224759	5.57848	0.775689	0.571652	5.57848	0.427428	ENSG00000091651
ENSG00000091656	0.267114	1.80889	0.732999	-0.289465	1.80889	0.711512	-0.906623	1.80889	0.19492	-2.96897	1.80889	0.000278448	ENSG00000091656
ENSG00000091732	0.0310206	4.64879	0.968212	0.0409493	4.64879	0.958307	-0.562399	4.64879	0.438371	0.182093	4.64879	0.816939	ENSG00000091732
ENSG00000091844	0.18297	1.68184	0.826216	0.229895	1.68184	0.783186	0.0255887	1.68184	0.977028	2.53629	1.68184	1.78e-05	ENSG00000091844
ENSG00000091879	2.56501	3.96234	2.16e-09	2.86468	3.96234	3.72e-11	1.42372	3.96234	0.00495754	1.8286	3.96234	0.000112574	ENSG00000091879
ENSG00000091947	-0.16933	5.54056	0.831144	-0.0172454	5.54056	0.983535	-0.171185	5.54056	0.829309	-1.60679	5.54056	8.51e-05	ENSG00000091947
ENSG00000091972	-0.127052	3.84552	0.87325	0.688329	3.84552	0.323572	-0.12062	3.84552	0.879896	-0.195128	3.84552	0.804477	ENSG00000091972
ENSG00000091986	-0.456069	7.23731	0.54785	-0.687407	7.23731	0.328915	-0.546529	7.23731	0.459687	-0.88548	7.23731	0.173371	ENSG00000091986
ENSG00000092010	0.480308	8.34421	0.521399	0.892286	8.34421	0.130802	0.213996	8.34421	0.784671	0.0826653	8.34421	0.918146	ENSG00000092010
ENSG00000092020	0.158636	4.35058	0.840311	0.84476	4.35058	0.187057	0.787546	4.35058	0.230846	0.642926	4.35058	0.362657	ENSG00000092020
ENSG00000092094	-0.194769	3.35296	0.805141	-0.0457009	3.35296	0.954601	0.200955	3.35296	0.797629	0.10489	3.35296	0.894593	ENSG00000092094
ENSG00000092108	0.0625527	6.43548	0.937214	0.0251292	6.43548	0.974424	-0.0816097	6.43548	0.919499	0.0428571	6.43548	0.956815	ENSG00000092108
ENSG00000092140	-0.261459	6.06263	0.739093	-0.46788	6.06263	0.534725	-0.228373	6.06263	0.772079	-0.560963	6.06263	0.439446	ENSG00000092140
ENSG00000092148	0.164267	7.16025	0.835698	-0.0984701	7.16025	0.903437	-0.431569	7.16025	0.57382	-0.00971257	7.16025	0.991151	ENSG00000092148
ENSG00000092199	0.455187	8.9559	0.55368	0.846827	8.9559	0.167287	0.0131181	8.9559	0.986669	1.75625	8.9559	1.47e-08	ENSG00000092199
ENSG00000092200	1.44619	0.84862	0.164983	-0.219523	0.84862	0.859777	0.892898	0.84862	0.395983	5.90532	0.84862	1.12e-11	ENSG00000092200
ENSG00000092201	-0.0373096	8.71995	0.963823	-0.212539	8.71995	0.787945	-0.317744	8.71995	0.683378	-0.421171	8.71995	0.586078	ENSG00000092201
ENSG00000092203	0.42413	6.85978	0.575016	0.477702	6.85978	0.521456	0.167931	6.85978	0.830697	0.475474	6.85978	0.523725	ENSG00000092203
ENSG00000092208	-0.403256	3.20502	0.600448	-0.653027	3.20502	0.373857	-0.186417	3.20502	0.814487	0.945906	3.20502	0.148883	ENSG00000092208
ENSG00000092330	0.277261	5.39672	0.721707	0.818125	5.39672	0.195197	0.360844	5.39672	0.639023	-0.757045	5.39672	0.253663	ENSG00000092330
ENSG00000092439	0.146846	5.72702	0.852438	0.492404	5.72702	0.507033	-0.100434	5.72702	0.90038	0.464605	5.72702	0.53546	ENSG00000092439
ENSG00000092445	-0.739163	4.1974	0.273235	-1.02554	4.1974	0.0795826	0.38421	4.1974	0.614655	-0.10403	4.1974	0.896295	ENSG00000092445
ENSG00000092470	-0.608343	6.0007	0.392295	-0.814154	6.0007	0.19866	-0.160561	6.0007	0.839971	-0.623501	6.0007	0.377483	ENSG00000092470
ENSG00000092531	0.4155	6.01078	0.584431	0.491953	6.01078	0.507328	-0.0114586	6.01078	0.989378	0.305482	6.01078	0.693664	ENSG00000092531
ENSG00000092758	-0.615381	1.63767	0.448854	-1.14682	1.63767	0.174306	0.598535	1.63767	0.432008	4.02215	1.63767	1.62e-12	ENSG00000092758
ENSG00000092820	-0.0594425	8.46645	0.942164	-0.0123856	8.46645	0.988581	-0.596476	8.46645	0.403942	-0.190743	8.46645	0.80975	ENSG00000092820
ENSG00000092841	-0.332864	9.30709	0.668433	-0.179529	9.30709	0.821064	-0.827564	9.30709	0.184917	-1.55595	9.30709	1.76e-05	ENSG00000092841
ENSG00000092847	-0.56355	4.96831	0.437548	-0.849306	4.96831	0.177005	-0.206412	4.96831	0.794174	-0.766674	4.96831	0.246733	ENSG00000092847
ENSG00000092853	0.00593352	8.50385	0.993067	-0.0694819	8.50385	0.931621	-0.387836	8.50385	0.613921	-0.650856	8.50385	0.350834	ENSG00000092853
ENSG00000092931	-0.168616	4.06875	0.831562	-0.156999	4.06875	0.843099	0.17172	4.06875	0.827134	0.443948	4.06875	0.555247	ENSG00000092931
ENSG00000092964	-0.113451	8.40731	0.887535	-0.211376	8.40731	0.78917	0.175946	8.40731	0.822759	-0.535347	8.40731	0.465325	ENSG00000092964
ENSG00000092969	1.08958	6.43355	0.0356623	0.872444	6.43355	0.153273	-0.025966	6.43355	0.975015	0.0851586	6.43355	0.913892	ENSG00000092969
ENSG00000092978	-0.0495291	4.94904	0.951113	0.0083254	4.94904	0.991203	-0.240803	4.94904	0.759646	0.191638	4.94904	0.807433	ENSG00000092978
ENSG00000093000	0.210579	6.55973	0.78819	0.39343	6.55973	0.611436	0.253587	6.55973	0.745184	0.498874	6.55973	0.500886	ENSG00000093000
ENSG00000093009	-0.674028	5.4318	0.328544	-0.841966	5.4318	0.178295	0.124532	5.4318	0.874537	-0.659578	5.4318	0.342874	ENSG00000093009
ENSG00000093010	0.0770716	6.5794	0.920579	-0.167756	6.5794	0.834712	0.262007	6.5794	0.736069	0.507527	6.5794	0.495656	ENSG00000093010
ENSG00000093144	0.457646	6.13786	0.544562	0.336167	6.13786	0.663356	0.524424	6.13786	0.474448	0.280401	6.13786	0.71865	ENSG00000093144
ENSG00000093167	0.464674	6.63984	0.537959	0.872757	6.63984	0.146796	-0.271074	6.63984	0.729458	0.912424	6.63984	0.117569	ENSG00000093167
ENSG00000093183	-0.265587	5.71913	0.734962	-0.210193	5.71913	0.790236	-0.267268	5.71913	0.733311	-0.252638	5.71913	0.747812	ENSG00000093183
ENSG00000094631	0.436431	6.2805	0.562875	0.443667	6.2805	0.555779	-0.263753	6.2805	0.738121	-0.767259	6.2805	0.259757	ENSG00000094631
ENSG00000094804	-0.0593243	7.02293	0.942201	-0.232912	7.02293	0.767485	0.122739	7.02293	0.878375	-0.628243	7.02293	0.372526	ENSG00000094804
ENSG00000094841	-0.282207	2.96474	0.717512	-0.572867	2.96474	0.434686	-0.0699159	2.96474	0.930651	-0.996636	2.96474	0.132359	ENSG00000094841
ENSG00000094880	-0.154576	4.15562	0.845742	-0.144136	4.15562	0.85613	0.0563426	4.15562	0.9429	0.0376478	4.15562	0.961932	ENSG00000094880
ENSG00000094914	-0.124512	2.79544	0.875499	-0.403638	2.79544	0.599936	-0.2881	2.79544	0.712548	0.276505	2.79544	0.724668	ENSG00000094914
ENSG00000094916	-0.00459566	7.68541	0.99633	-0.184055	7.68541	0.816406	-0.330811	7.68541	0.670365	0.416385	7.68541	0.589188	ENSG00000094916
ENSG00000094975	0.218581	6.82013	0.780174	0.491293	6.82013	0.509059	-0.127187	6.82013	0.874386	0.833593	6.82013	0.178842	ENSG00000094975
ENSG00000095002	-0.130423	5.95542	0.870398	-0.407667	5.95542	0.594797	0.0669303	5.95542	0.933154	-0.114984	5.95542	0.885869	ENSG00000095002
ENSG00000095015	-0.448901	5.00704	0.551741	-0.236662	5.00704	0.763766	-0.484015	5.00704	0.516616	-1.35321	5.00704	0.00528366	ENSG00000095015
ENSG00000095066	-0.469736	4.08193	0.530624	-0.431285	4.08193	0.56882	0.403245	4.08193	0.595539	0.904611	4.08193	0.140681	ENSG00000095066
ENSG00000095139	0.189283	6.23717	0.80955	0.2012	6.23717	0.797632	-0.223321	6.23717	0.777082	0.434898	6.23717	0.568074	ENSG00000095139
ENSG00000095209	-0.0347239	3.65716	0.965558	-0.709758	3.65716	0.311673	0.489885	3.65716	0.509936	0.680596	3.65716	0.331263	ENSG00000095209
ENSG00000095261	-0.273613	4.89779	0.72686	-0.164148	4.89779	0.836287	0.206558	4.89779	0.792229	-0.330809	4.89779	0.669486	ENSG00000095261
ENSG00000095303	-0.678647	1.91334	0.439041	-0.500636	1.91334	0.570059	1.41495	1.91334	0.0514074	0.931088	1.91334	0.252668	ENSG00000095303
ENSG00000095319	0.202585	3.41458	0.796217	-0.226914	3.41458	0.772767	-0.491842	3.41458	0.509027	-0.569692	3.41458	0.435699	ENSG00000095319
ENSG00000095321	-0.710892	4.45821	0.296615	-0.600182	4.45821	0.401762	-0.0946206	4.45821	0.906103	-0.729063	4.45821	0.281928	ENSG00000095321
ENSG00000095370	1.04731	5.32299	0.0500593	0.539504	5.32299	0.459547	1.51236	5.32299	7.97e-05	0.00416636	5.32299	0.995453	ENSG00000095370
ENSG00000095380	-0.266392	7.12848	0.734157	-0.136422	7.12848	0.864981	0.17095	7.12848	0.828607	-0.587506	7.12848	0.412839	ENSG00000095380
ENSG00000095383	0.296464	5.2207	0.702527	-0.425319	5.2207	0.575305	0.125695	5.2207	0.873311	-0.994678	5.2207	0.0843952	ENSG00000095383
ENSG00000095485	0.341747	4.71151	0.657304	0.506587	4.71151	0.492537	0.289447	4.71151	0.709369	0.957477	4.71151	0.101214	ENSG00000095485
ENSG00000095564	0.138749	5.61697	0.860803	0.240232	5.61697	0.758676	0.0229155	5.61697	0.976729	0.316334	5.61697	0.682845	ENSG00000095564
ENSG00000095574	-0.0791894	3.90156	0.921281	-0.287575	3.90156	0.712317	-0.326631	3.90156	0.673505	-0.191032	3.90156	0.808795	ENSG00000095574
ENSG00000095637	-0.563119	5.27701	0.43742	-1.66432	5.27701	2.51e-05	0.0259344	5.27701	0.973557	-0.754089	5.27701	0.254742	ENSG00000095637
ENSG00000095739	0.558487	2.69093	0.44817	1.00867	2.69093	0.111243	-0.417312	2.69093	0.58394	1.11165	2.69093	0.071959	ENSG00000095739
ENSG00000095752	2.25354	2.33123	0.000449559	2.66866	2.33123	2.22e-05	0.437741	2.33123	0.593948	1.83499	2.33123	0.00866371	ENSG00000095752
ENSG00000095787	0.0367868	8.62287	0.963392	0.0134185	8.62287	0.986406	0.193311	8.62287	0.806102	1.5957	8.62287	2.15e-06	ENSG00000095787
ENSG00000095794	0.4976	5.28527	0.501442	0.646476	5.28527	0.354321	0.417848	5.28527	0.582263	1.98322	5.28527	1.32e-09	ENSG00000095794
ENSG00000095906	-0.663794	4.03974	0.349569	-0.839148	4.03974	0.208346	-0.109012	4.03974	0.892154	-0.777716	4.03974	0.257696	ENSG00000095906
ENSG00000095951	0.0150514	5.81098	0.984268	0.654271	5.81098	0.345786	0.0911002	5.81098	0.908197	0.427595	5.81098	0.572201	ENSG00000095951
ENSG00000096060	-0.835822	7.77562	0.177474	-0.717493	7.77562	0.286829	-0.161568	7.77562	0.839628	-0.395086	7.77562	0.610388	ENSG00000096060
ENSG00000096063	-0.309025	6.77069	0.691827	-0.182302	6.77069	0.818119	-0.0365934	6.77069	0.964523	-0.37206	6.77069	0.63095	ENSG00000096063
ENSG00000096070	0.138558	4.24556	0.860465	0.435811	4.24556	0.563254	-0.135807	4.24556	0.864552	0.809465	4.24556	0.211684	ENSG00000096070
ENSG00000096092	-1.03013	4.30669	0.0888377	-1.56127	4.30669	0.00280038	-0.158568	4.30669	0.842541	-0.0893472	4.30669	0.911404	ENSG00000096092
ENSG00000096093	0.870942	3.35407	0.176345	0.793964	3.35407	0.235039	0.579576	3.35407	0.422664	0.499409	3.35407	0.502783	ENSG00000096093
ENSG00000096384	0.439678	11.2121	0.560007	0.574766	11.2121	0.423989	-0.351624	11.2121	0.649936	-0.450104	11.2121	0.551515	ENSG00000096384
ENSG00000096401	0.14717	7.26409	0.852437	0.163775	7.26409	0.835505	-0.15465	7.26409	0.845933	0.892483	7.26409	0.130834	ENSG00000096401
ENSG00000096433	0.237249	5.45574	0.761502	0.41344	5.45574	0.585746	-0.456061	5.45574	0.544837	-0.204451	5.45574	0.796049	ENSG00000096433
ENSG00000096654	-0.908908	2.56739	0.223151	-0.884977	2.56739	0.241304	0.193523	2.56739	0.806658	1.70663	2.56739	0.00345635	ENSG00000096654
ENSG00000096696	2.90073	5.7788	1.06e-08	4.04093	5.7788	7.51e-14	-0.917259	5.7788	0.214625	3.07545	5.7788	2.7e-09	ENSG00000096696
ENSG00000096717	0.140334	4.54293	0.85878	0.138245	4.54293	0.860918	-0.202441	4.54293	0.797957	0.507528	4.54293	0.491802	ENSG00000096717
ENSG00000096746	0.167431	7.96127	0.832017	0.102945	7.96127	0.897542	-0.334923	7.96127	0.666292	1.11588	7.96127	0.0209309	ENSG00000096746
ENSG00000096872	0.273846	4.66543	0.725063	0.0962483	4.66543	0.902963	0.166428	4.66543	0.832434	0.536019	4.66543	0.463664	ENSG00000096872
ENSG00000096968	0.617936	5.30835	0.381915	1.97376	5.30835	1.77e-09	-0.212625	5.30835	0.787546	0.214816	5.30835	0.784413	ENSG00000096968
ENSG00000097007	-0.124888	5.26869	0.875941	0.270346	5.26869	0.728424	-0.143311	5.26869	0.857541	-1.65463	5.26869	0.000431012	ENSG00000097007
ENSG00000097021	-0.512938	5.28441	0.4875	-0.322767	5.28441	0.677884	-0.408336	5.28441	0.593359	-0.643906	5.28441	0.358213	ENSG00000097021
ENSG00000097033	0.55188	7.62733	0.446781	0.956566	7.62733	0.0867799	0.0434732	7.62733	0.956727	0.621173	7.62733	0.377769	ENSG00000097033
ENSG00000097046	0.059932	4.23172	0.939249	-0.109617	4.23172	0.890577	0.317554	4.23172	0.68109	1.12182	4.23172	0.0413751	ENSG00000097046
ENSG00000097096	-0.43988	2.673	0.562975	-0.947856	2.673	0.163172	-0.352511	2.673	0.647988	0.17511	2.673	0.825052	ENSG00000097096
ENSG00000099194	0.42409	8.51577	0.576315	0.288436	8.51577	0.710479	1.21028	8.51577	0.00664691	0.870201	8.51577	0.1483	ENSG00000099194
ENSG00000099204	-0.117432	6.89612	0.88355	-0.549793	6.89612	0.450492	0.183971	6.89612	0.814805	0.0594614	6.89612	0.940306	ENSG00000099204
ENSG00000099219	-0.98587	5.28133	0.0816103	-1.59366	5.28133	8.55e-05	0.367834	5.28133	0.632108	-0.1336	5.28133	0.866891	ENSG00000099219
ENSG00000099246	-0.186833	6.54659	0.81358	0.00561283	6.54659	0.994028	-0.0609015	6.54659	0.940584	-0.119498	6.54659	0.882023	ENSG00000099246
ENSG00000099250	1.30793	6.79391	0.00164861	1.14567	6.79391	0.0160767	0.777688	6.79391	0.228203	0.359286	6.79391	0.64172	ENSG00000099250
ENSG00000099251	0.666023	1.93973	0.408204	0.653317	1.93973	0.422465	0.479468	1.93973	0.554379	3.19036	1.93973	3.02e-07	ENSG00000099251
ENSG00000099256	-1.05558	2.65874	0.101724	-1.15543	2.65874	0.0698996	0.121496	2.65874	0.877003	-0.0885656	2.65874	0.911046	ENSG00000099256
ENSG00000099260	-0.201733	6.37436	0.801686	-0.786356	6.37436	0.261234	-0.256052	6.37436	0.747715	-0.725523	6.37436	0.310181	ENSG00000099260
ENSG00000099282	-1.3758	3.54028	0.0163914	-2.5117	3.54028	9.14e-06	0.0652965	3.54028	0.933233	-0.522454	3.54028	0.483565	ENSG00000099282
ENSG00000099290	1.08824	6.02371	0.044315	1.40535	6.02371	0.00194898	-0.037156	6.02371	0.963837	0.517847	6.02371	0.482071	ENSG00000099290
ENSG00000099326	-0.189009	3.37325	0.811827	-0.392989	3.37325	0.610467	0.12051	3.37325	0.878013	0.0806969	3.37325	0.91904	ENSG00000099326
ENSG00000099330	-0.92404	3.56351	0.144257	-1.5682	3.56351	0.00300864	0.480559	3.56351	0.518592	0.0388876	3.56351	0.960654	ENSG00000099330
ENSG00000099331	0.32311	5.64688	0.67612	0.867399	5.64688	0.153437	-0.272141	5.64688	0.728405	-0.825502	5.64688	0.192973	ENSG00000099331
ENSG00000099337	0.412854	5.4363	0.589032	-0.121705	5.4363	0.879095	-0.0126566	5.4363	0.988187	-1.66137	5.4363	4.47e-05	ENSG00000099337
ENSG00000099341	-0.0345643	8.22743	0.966516	-0.0395113	8.22743	0.961572	-0.260286	8.22743	0.740293	-0.317567	8.22743	0.683501	ENSG00000099341
ENSG00000099364	-0.056744	1.9904	0.943181	0.338637	1.9904	0.666679	0.141905	1.9904	0.857796	-2.73544	1.9904	0.00150534	ENSG00000099364
ENSG00000099377	-0.333105	3.10945	0.671854	-0.267075	3.10945	0.736115	0.202703	3.10945	0.796722	-0.321259	3.10945	0.684346	ENSG00000099377
ENSG00000099381	-0.0918634	4.09936	0.908674	-0.16554	4.09936	0.834776	-0.703585	4.09936	0.304455	-0.666074	4.09936	0.341532	ENSG00000099381
ENSG00000099385	-0.558254	3.03485	0.447945	-0.48944	3.03485	0.513757	-0.423591	3.03485	0.577473	-0.575874	3.03485	0.434118	ENSG00000099385
ENSG00000099622	-0.238842	6.2404	0.761769	-0.455062	6.2404	0.546052	-0.284334	6.2404	0.716465	-0.303497	6.2404	0.697348	ENSG00000099622
ENSG00000099624	-0.0291289	2.24112	0.970909	-0.49436	2.24112	0.516477	0.454967	2.24112	0.547422	0.0325999	2.24112	0.968362	ENSG00000099624
ENSG00000099783	0.296008	8.36438	0.702944	0.288531	8.36438	0.710368	-0.407393	8.36438	0.600038	0.128023	8.36438	0.873547	ENSG00000099783
ENSG00000099785	-0.683368	2.92034	0.336294	-1.12738	2.92034	0.0750124	0.310823	2.92034	0.687481	0.550558	2.92034	0.453715	ENSG00000099785
ENSG00000099795	-0.608394	5.58388	0.420135	-0.199497	5.58388	0.805543	-0.738107	5.58388	0.312898	-0.678555	5.58388	0.364545	ENSG00000099795
ENSG00000099800	-0.721443	8.28324	0.313779	-0.988977	8.28324	0.133627	-0.960537	8.28324	0.148275	-0.793756	8.28324	0.257701	ENSG00000099800
ENSG00000099804	-0.38258	5.11591	0.618469	-0.453019	5.11591	0.548143	-0.489098	5.11591	0.512242	-0.563661	5.11591	0.438854	ENSG00000099804
ENSG00000099810	-0.339033	5.36342	0.661661	-0.655021	5.36342	0.347126	-0.0473384	5.36342	0.953784	0.532299	5.36342	0.466744	ENSG00000099810
ENSG00000099814	-0.244802	3.66487	0.755335	-0.0220641	3.66487	0.978555	-0.655347	3.66487	0.351248	-0.758173	3.66487	0.266187	ENSG00000099814
ENSG00000099817	-0.295308	9.84463	0.707455	-0.490253	9.84463	0.514422	-0.350856	9.84463	0.652155	-0.353157	9.84463	0.649866	ENSG00000099817
ENSG00000099821	-0.691977	2.48146	0.337165	-0.825987	2.48146	0.239229	-0.157843	2.48146	0.842759	-1.81766	2.48146	0.00544687	ENSG00000099821
ENSG00000099840	0.0815661	1.94872	0.919391	-0.638376	1.94872	0.416629	-1.41742	1.94872	0.0506792	-1.22047	1.94872	0.123451	ENSG00000099840
ENSG00000099849	-0.829183	4.0718	0.198484	-1.11573	4.0718	0.0459312	-0.479989	4.0718	0.520613	-1.491	4.0718	0.00263202	ENSG00000099849
ENSG00000099860	-1.23251	7.03445	0.00625071	-1.55805	7.03445	5.48e-05	-0.272059	7.03445	0.728518	2.06105	7.03445	4.87e-10	ENSG00000099860
ENSG00000099864	-0.874465	6.35923	0.168948	-0.811494	6.35923	0.216698	-0.610917	6.35923	0.394674	-0.663916	6.35923	0.345299	ENSG00000099864
ENSG00000099875	-0.616853	6.87446	0.383662	-0.879302	6.87446	0.142666	-0.197252	6.87446	0.803141	-0.998669	6.87446	0.066824	ENSG00000099875
ENSG00000099889	-0.286897	3.34398	0.712857	-0.350431	3.34398	0.649226	-0.110548	3.34398	0.889991	-1.84112	3.34398	0.000752352	ENSG00000099889
ENSG00000099899	-0.287387	3.64463	0.712797	-0.923963	3.64463	0.141894	-0.0575075	3.64463	0.943341	-1.4641	3.64463	0.00606745	ENSG00000099899
ENSG00000099901	-0.0877732	6.71749	0.914177	-0.111153	6.71749	0.890881	-0.0996446	6.71749	0.902451	-0.179774	6.71749	0.820652	ENSG00000099901
ENSG00000099904	-0.285537	4.57659	0.715846	-0.994909	4.57659	0.112255	-0.0857236	4.57659	0.915749	-0.2822	4.57659	0.718985	ENSG00000099904
ENSG00000099910	-0.613962	4.25563	0.391303	-0.812502	4.25563	0.217931	-0.343855	4.25563	0.657049	-1.33172	4.25563	0.0143417	ENSG00000099910
ENSG00000099917	0.777893	3.73498	0.24224	0.972234	3.73498	0.106561	0.302161	3.73498	0.696435	0.00200567	3.73498	0.998357	ENSG00000099917
ENSG00000099937	1.00159	0.767853	0.410351	2.86216	0.767853	0.00453476	0.357046	0.767853	0.775154	5.50214	0.767853	1.62e-09	ENSG00000099937
ENSG00000099940	-0.112	5.69675	0.889218	-0.26559	5.69675	0.734936	-0.0312382	5.69675	0.969696	-0.0527234	5.69675	0.948287	ENSG00000099940
ENSG00000099942	-0.418725	4.80722	0.581969	-0.394041	4.80722	0.606613	-0.296719	4.80722	0.703867	0.335258	4.80722	0.664118	ENSG00000099942
ENSG00000099949	-0.354002	3.97988	0.646145	-0.357543	3.97988	0.642512	-0.0680019	3.97988	0.932749	-1.16263	3.97988	0.0414256	ENSG00000099949
ENSG00000099954	-0.750605	0.74898	0.633034	-0.622529	0.74898	0.696918	-0.26716	0.74898	0.841379	6.22589	0.74898	5.83e-11	ENSG00000099954
ENSG00000099956	-0.152997	4.89616	0.847637	-0.421584	4.89616	0.579135	-0.253872	4.89616	0.746752	-0.587261	4.89616	0.414906	ENSG00000099956
ENSG00000099968	0.225269	6.2491	0.773569	0.922828	6.2491	0.111224	-0.0170649	6.2491	0.983738	1.18853	6.2491	0.0104692	ENSG00000099968
ENSG00000099991	-0.550809	5.42415	0.449765	-0.30408	5.42415	0.696586	-0.598577	5.42415	0.402303	-1.17802	5.42415	0.0200092	ENSG00000099991
ENSG00000099992	-0.191721	3.9868	0.808736	0.11867	3.9868	0.880263	-0.11859	3.9868	0.882186	0.586038	3.9868	0.418003	ENSG00000099992
ENSG00000099995	0.0709084	6.83163	0.930154	-0.134961	6.83163	0.868237	-0.0807791	6.83163	0.921369	-0.541992	6.83163	0.458352	ENSG00000099995
ENSG00000099998	-0.300943	4.42388	0.699354	0.255542	4.42388	0.743302	0.250658	4.42388	0.748023	0.0360615	4.42388	0.963311	ENSG00000099998
ENSG00000100003	-1.296	3.99723	0.025843	-0.885076	3.99723	0.182381	-0.314011	3.99723	0.687738	-0.799867	3.99723	0.245397	ENSG00000100003
ENSG00000100014	-0.342001	5.07207	0.658669	-0.415322	5.07207	0.585431	0.0479099	5.07207	0.95135	-1.01302	5.07207	0.0749882	ENSG00000100014
ENSG00000100027	-0.794288	2.50369	0.254183	-1.98931	2.50369	0.000954394	-0.525089	2.50369	0.481182	-1.15104	2.50369	0.0819138	ENSG00000100027
ENSG00000100028	-0.128552	6.59139	0.872165	0.0274871	6.59139	0.971851	0.057968	6.59139	0.941456	-0.753103	6.59139	0.252925	ENSG00000100028
ENSG00000100029	0.41751	4.9249	0.581663	0.135516	4.9249	0.863046	-0.427361	4.9249	0.574483	-1.0699	4.9249	0.0782642	ENSG00000100029
ENSG00000100030	-0.353803	6.58161	0.647619	-0.134339	6.58161	0.866367	-0.0842312	6.58161	0.916879	-0.911391	6.58161	0.121424	ENSG00000100030
ENSG00000100034	-0.0909055	4.09686	0.909771	-0.382071	4.09686	0.618346	0.0651554	4.09686	0.933683	-0.862679	4.09686	0.182416	ENSG00000100034
ENSG00000100036	0.762782	4.71589	0.246033	0.217631	4.71589	0.781326	-0.121338	4.71589	0.879161	-0.439308	4.71589	0.560568	ENSG00000100036
ENSG00000100056	0.0137916	3.12575	0.985741	-0.423634	3.12575	0.576707	-0.231577	3.12575	0.768501	-1.47579	3.12575	0.0127791	ENSG00000100056
ENSG00000100058	0.269104	4.16994	0.729691	0.257013	4.16994	0.741869	0.223167	4.16994	0.775544	0.247788	4.16994	0.751333	ENSG00000100058
ENSG00000100060	-0.567465	6.32802	0.435651	-0.796407	6.32802	0.225379	0.225066	6.32802	0.773325	-0.415662	6.32802	0.58601	ENSG00000100060
ENSG00000100065	-0.541878	4.3362	0.459234	-0.524733	4.3362	0.476237	-0.39478	4.3362	0.605931	-0.942772	4.3362	0.12128	ENSG00000100065
ENSG00000100075	-0.249839	5.08818	0.750626	-0.337013	5.08818	0.663538	-0.176951	5.08818	0.823548	-0.729954	5.08818	0.277981	ENSG00000100075
ENSG00000100083	-0.192821	5.32679	0.807665	-0.292702	5.32679	0.707929	-0.160891	5.32679	0.839657	-0.865383	5.32679	0.16165	ENSG00000100083
ENSG00000100084	0.358826	2.75491	0.641681	0.802225	2.75491	0.24203	0.168482	2.75491	0.830481	-0.0577856	2.75491	0.940546	ENSG00000100084
ENSG00000100092	-1.16473	2.13539	0.098133	-0.551457	2.13539	0.471724	0.249094	2.13539	0.75068	-0.119448	2.13539	0.880247	ENSG00000100092
ENSG00000100097	0.299229	8.1568	0.699754	0.234739	8.1568	0.763928	-0.240284	8.1568	0.760189	-0.360721	8.1568	0.640888	ENSG00000100097
ENSG00000100099	0.199673	5.107	0.799202	0.165384	5.107	0.833727	-0.0855403	5.107	0.915293	-0.0373672	5.107	0.963195	ENSG00000100099
ENSG00000100100	-0.927154	4.92094	0.124414	-1.20838	4.92094	0.0204441	0.895703	4.92094	0.136332	-0.121956	4.92094	0.878275	ENSG00000100100
ENSG00000100105	-0.125888	4.98366	0.874682	-0.32959	4.98366	0.670989	-0.303806	4.98366	0.696845	-0.860036	4.98366	0.169253	ENSG00000100105
ENSG00000100106	-0.316037	6.32476	0.685089	-0.197257	6.32476	0.80361	-0.190604	6.32476	0.810298	-1.05553	6.32476	0.0561448	ENSG00000100106
ENSG00000100109	1.00901	2.7954	0.109081	1.02952	2.7954	0.101078	0.0598901	2.7954	0.93971	1.64946	2.7954	0.0011136	ENSG00000100109
ENSG00000100116	-0.816227	2.74815	0.229203	-1.38515	2.74815	0.0180977	-0.671831	2.74815	0.342666	-1.34428	2.74815	0.027516	ENSG00000100116
ENSG00000100124	-0.420394	3.68279	0.579534	-0.446392	3.68279	0.553713	-0.049914	3.68279	0.950766	1.45434	3.68279	0.00154621	ENSG00000100124
ENSG00000100138	-0.143377	8.26851	0.857895	-0.240002	8.26851	0.760488	0.034286	8.26851	0.96572	0.296331	8.26851	0.702639	ENSG00000100138
ENSG00000100139	0.301865	5.62146	0.697181	0.624314	5.62146	0.37516	-0.0430174	5.62146	0.958058	-0.992052	5.62146	0.0821997	ENSG00000100139
ENSG00000100150	-0.0285214	2.27769	0.971122	0.0817702	2.27769	0.918297	0.143728	2.27769	0.854835	-0.944387	2.27769	0.191482	ENSG00000100150
ENSG00000100154	0.414453	4.70607	0.585334	0.471675	4.70607	0.527703	0.124399	4.70607	0.874843	-0.936585	4.70607	0.126519	ENSG00000100154
ENSG00000100162	-0.626302	5.19468	0.375085	-1.46163	5.19468	0.000726123	0.25476	5.19468	0.744069	-0.306493	5.19468	0.694039	ENSG00000100162
ENSG00000100196	-0.834809	3.13011	0.21006	-1.6157	3.13011	0.00286697	0.08134	3.13011	0.917592	-0.626717	3.13011	0.384595	ENSG00000100196
ENSG00000100201	-0.218651	8.53823	0.781819	-0.194154	8.53823	0.806337	-0.215111	8.53823	0.785355	-0.79579	8.53823	0.212952	ENSG00000100201
ENSG00000100207	0.350466	6.23643	0.649721	0.587271	6.23643	0.411541	0.355233	6.23643	0.645171	-0.601765	6.23643	0.398885	ENSG00000100207
ENSG00000100209	1.05998	5.16118	0.0485778	1.51138	5.16118	0.000156463	0.804692	5.16118	0.208788	2.53436	5.16118	8.12e-15	ENSG00000100209
ENSG00000100211	-0.474622	5.34619	0.526077	-1.01216	5.34619	0.0690176	0.0980138	5.34619	0.901081	-0.20147	5.34619	0.798946	ENSG00000100211
ENSG00000100216	-0.018013	7.09642	0.982904	-0.180456	7.09642	0.819986	-0.110646	7.09642	0.890298	-0.485768	7.09642	0.515118	ENSG00000100216
ENSG00000100219	0.744975	6.93793	0.258463	1.304	6.93793	0.00171006	0.132919	6.93793	0.866989	1.31654	6.93793	0.00145212	ENSG00000100219
ENSG00000100220	-0.437059	6.30678	0.564206	-0.331481	6.30678	0.669619	-0.467584	6.30678	0.533574	-1.38165	6.30678	0.00215222	ENSG00000100220
ENSG00000100221	-0.352835	6.1831	0.648974	-0.628567	6.1831	0.372363	-0.158016	6.1831	0.843833	1.28936	6.1831	0.00244763	ENSG00000100221
ENSG00000100225	-0.144505	7.07411	0.856402	0.452269	7.07411	0.55003	0.170036	7.07411	0.829289	0.298984	7.07411	0.700084	ENSG00000100225
ENSG00000100226	0.443486	5.15208	0.556869	0.856197	5.15208	0.165655	0.0514732	5.15208	0.948241	-0.575493	5.15208	0.425423	ENSG00000100226
ENSG00000100227	-0.104268	6.30301	0.896605	-0.0770546	6.30301	0.923875	-0.451606	6.30301	0.549635	-0.825691	6.30301	0.190299	ENSG00000100227
ENSG00000100234	0.366519	7.38178	0.633109	0.957432	7.38178	0.0870011	1.12262	7.38178	0.0202214	-0.507728	7.38178	0.492943	ENSG00000100234
ENSG00000100239	-0.0832461	4.45486	0.917271	-0.207656	4.45486	0.792566	0.304644	4.45486	0.694194	-0.352229	4.45486	0.647694	ENSG00000100239
ENSG00000100241	-0.398108	5.68665	0.605828	-0.224007	5.68665	0.778483	-0.765937	5.68665	0.268072	-1.65936	5.68665	0.00275377	ENSG00000100241
ENSG00000100242	0.557135	2.30912	0.453697	1.26151	2.30912	0.0352651	-0.172104	2.30912	0.826529	0.345194	2.30912	0.659673	ENSG00000100242
ENSG00000100243	0.285497	8.54486	0.713376	0.652592	8.54486	0.346858	-0.0238018	8.54486	0.977189	0.0417177	8.54486	0.958618	ENSG00000100243
ENSG00000100246	-0.166722	4.20419	0.833662	-0.43545	4.20419	0.564673	-0.348021	4.20419	0.652279	0.367501	4.20419	0.631638	ENSG00000100246
ENSG00000100258	-0.462897	5.962	0.539615	-0.663715	5.962	0.346283	-0.479368	5.962	0.523306	-0.996953	5.962	0.101005	ENSG00000100258
ENSG00000100263	-0.552519	3.29385	0.452454	-0.433196	3.29385	0.568058	-0.462503	3.29385	0.539062	-0.509092	3.29385	0.495182	ENSG00000100263
ENSG00000100266	-0.166461	5.20037	0.833972	-0.266995	5.20037	0.733425	0.164925	5.20037	0.833977	-0.000991636	5.20037	0.999638	ENSG00000100266
ENSG00000100280	-0.0762209	6.90988	0.924797	-0.132135	6.90988	0.868596	-0.0868795	6.90988	0.914138	-0.402562	6.90988	0.599108	ENSG00000100280
ENSG00000100281	0.0940781	6.33031	0.90713	0.182018	6.33031	0.817407	0.0726986	6.33031	0.928221	-0.977989	6.33031	0.0818337	ENSG00000100281
ENSG00000100284	0.560999	4.04065	0.43887	0.160442	4.04065	0.838606	-0.144199	4.04065	0.85622	-0.903569	4.04065	0.157468	ENSG00000100284
ENSG00000100288	-0.17046	3.4899	0.829928	-0.194877	3.4899	0.805338	-0.430371	3.4899	0.570692	-1.55352	3.4899	0.00631682	ENSG00000100288
ENSG00000100292	0.278696	8.23356	0.719251	0.765574	8.23356	0.263299	-0.658571	8.23356	0.358302	0.0153492	8.23356	0.981972	ENSG00000100292
ENSG00000100294	-0.182843	2.82136	0.817099	-0.558113	2.82136	0.450244	-0.0909498	2.82136	0.909592	-1.82632	2.82136	0.00304291	ENSG00000100294
ENSG00000100296	0.0999947	5.2413	0.899536	-0.0546394	5.2413	0.946057	-0.0903828	5.2413	0.910375	-0.377511	5.2413	0.623263	ENSG00000100296
ENSG00000100297	-0.611983	6.58901	0.391852	-0.940682	6.58901	0.118496	-0.310025	6.58901	0.691427	-0.984202	6.58901	0.0951022	ENSG00000100297
ENSG00000100299	0.0121318	4.33395	0.986676	0.210814	4.33395	0.787848	-0.509125	4.33395	0.493965	-0.359783	4.33395	0.641242	ENSG00000100299
ENSG00000100300	-0.460979	7.06926	0.541095	-0.289646	7.06926	0.711077	-0.540354	7.06926	0.459964	-0.383573	7.06926	0.61888	ENSG00000100300
ENSG00000100304	-0.700369	5.07313	0.309504	-1.39736	5.07313	0.00524667	-0.0217734	5.07313	0.979477	-1.17545	5.07313	0.0333211	ENSG00000100304
ENSG00000100307	-1.17091	4.27235	0.0381893	-2.15157	4.27235	1.11e-05	0.257481	4.27235	0.74093	-2.41938	4.27235	2.48e-06	ENSG00000100307
ENSG00000100311	0.235555	3.60835	0.763073	-0.655671	3.60835	0.359509	0.504598	3.60835	0.496087	-2.61604	3.60835	1.46e-05	ENSG00000100311
ENSG00000100316	0.119869	6.73646	0.88072	0.204426	6.73646	0.794356	0.29183	6.73646	0.707125	0.856124	6.73646	0.159978	ENSG00000100316
ENSG00000100320	0.234204	7.14318	0.764498	0.174804	7.14318	0.826355	-0.21812	7.14318	0.782255	0.0847296	7.14318	0.916796	ENSG00000100320
ENSG00000100324	-0.533366	4.69769	0.467218	-0.359783	4.69769	0.640752	-0.1017	4.69769	0.898976	-1.49998	4.69769	0.00125199	ENSG00000100324
ENSG00000100325	0.234586	4.52441	0.764252	-0.103391	4.52441	0.897039	0.107953	4.52441	0.891078	0.180013	4.52441	0.819084	ENSG00000100325
ENSG00000100330	-0.128542	2.69838	0.871556	-0.334958	2.69838	0.665193	-0.778607	2.69838	0.258002	-1.32669	2.69838	0.0359386	ENSG00000100330
ENSG00000100335	-0.17633	6.3443	0.824123	-0.144645	6.3443	0.855909	-0.140927	6.3443	0.859703	0.0634885	6.3443	0.936108	ENSG00000100335
ENSG00000100336	-2.33473	0.357878	0.160897	1.35433	0.357878	0.243049	0.845027	0.357878	0.452454	5.61139	0.357878	3.3e-10	ENSG00000100336
ENSG00000100342	1.1963	8.04372	0.0117225	1.98995	8.04372	2.39e-08	0.0127791	8.04372	0.986149	0.361215	8.04372	0.638004	ENSG00000100342
ENSG00000100345	0.161601	9.77889	0.837455	0.17861	9.77889	0.8202	-1.02348	9.77889	0.053987	-0.652331	9.77889	0.349141	ENSG00000100345
ENSG00000100347	-0.316915	4.99439	0.68365	-0.427599	4.99439	0.573336	-0.0263422	4.99439	0.974479	-0.828362	4.99439	0.194088	ENSG00000100347
ENSG00000100348	-0.0145227	6.36693	0.986329	-0.430758	6.36693	0.570668	0.0674778	6.36693	0.931916	-0.320083	6.36693	0.680737	ENSG00000100348
ENSG00000100350	-0.401696	5.17952	0.600085	-1.16039	5.17952	0.0413296	-0.168364	5.17952	0.833042	-0.874532	5.17952	0.177277	ENSG00000100350
ENSG00000100351	-3.99026	1.61888	0.000435488	-3.45411	1.61888	0.00144758	-0.16759	1.61888	0.841743	-2.79095	1.61888	0.00838848	ENSG00000100351
ENSG00000100353	0.0646864	8.79805	0.934772	-0.000554602	8.79805	1.00041	-0.237895	8.79805	0.762633	0.350775	8.79805	0.648953	ENSG00000100353
ENSG00000100354	-0.148774	7.01111	0.852205	-0.470593	7.01111	0.531738	-0.21589	7.01111	0.784479	-0.973441	7.01111	0.0803574	ENSG00000100354
ENSG00000100359	-0.518907	5.44334	0.485886	-0.759668	5.44334	0.267346	-0.339102	5.44334	0.663062	-0.787652	5.44334	0.246519	ENSG00000100359
ENSG00000100360	-0.264636	3.9352	0.735493	-0.518405	3.9352	0.482543	0.105404	3.9352	0.893658	-0.564348	3.9352	0.43828	ENSG00000100360
ENSG00000100364	-0.354251	5.85384	0.646869	-0.485924	5.85384	0.514789	0.0812993	5.85384	0.917951	-1.60612	5.85384	6.82e-05	ENSG00000100364
ENSG00000100365	2.64773	0.470759	0.060826	4.23858	0.470759	0.0022132	0	0.470759	1	8.49874	0.470759	6.08e-12	ENSG00000100365
ENSG00000100372	-0.0207013	4.49859	0.979984	-0.212237	4.49859	0.787982	0.0861681	4.49859	0.913031	-0.231806	4.49859	0.768226	ENSG00000100372
ENSG00000100376	0.109006	4.01587	0.88989	0.374849	4.01587	0.624107	-0.0430159	4.01587	0.957858	-0.162939	4.01587	0.837155	ENSG00000100376
ENSG00000100379	-0.510143	4.44001	0.493234	-0.3982	4.44001	0.603387	-0.0125205	4.44001	0.988873	-0.852826	4.44001	0.1986	ENSG00000100379
ENSG00000100380	0.00463531	8.15074	0.994966	-0.0243881	8.15074	0.976581	-0.0405685	8.15074	0.960666	0.23504	8.15074	0.763643	ENSG00000100380
ENSG00000100387	-0.0898814	6.82799	0.911277	0.244579	6.82799	0.754178	-0.255958	6.82799	0.744519	-0.0867213	6.82799	0.914358	ENSG00000100387
ENSG00000100393	0.453872	6.89575	0.547104	0.264528	6.89575	0.734312	-0.26431	6.89575	0.7362	0.473705	6.89575	0.526622	ENSG00000100393
ENSG00000100395	-0.176623	4.65549	0.823854	-0.268669	4.65549	0.731742	-0.338206	4.65549	0.662382	-1.03439	4.65549	0.071799	ENSG00000100395
ENSG00000100401	-0.0814736	7.10102	0.919757	0.0481084	7.10102	0.950568	-0.419776	7.10102	0.581786	-1.11378	7.10102	0.0367728	ENSG00000100401
ENSG00000100403	0.715184	6.78098	0.28782	1.23954	6.78098	0.00632304	0.126755	6.78098	0.872169	-0.808545	6.78098	0.206351	ENSG00000100403
ENSG00000100410	0.423616	5.57275	0.576755	0.21972	5.57275	0.77915	-0.514682	5.57275	0.485738	-0.249838	5.57275	0.750572	ENSG00000100410
ENSG00000100412	0.322449	2.52154	0.677434	0.339228	2.52154	0.661269	-0.299858	2.52154	0.700673	-0.238482	2.52154	0.761328	ENSG00000100412
ENSG00000100413	-0.106469	2.74825	0.893597	-0.613963	2.74825	0.400761	0.243488	2.74825	0.754872	-1.03841	2.74825	0.123218	ENSG00000100413
ENSG00000100416	-0.175273	4.1176	0.825302	-0.0645369	4.1176	0.936185	-0.415138	4.1176	0.585733	-0.552982	4.1176	0.450656	ENSG00000100416
ENSG00000100417	-0.520876	5.11321	0.479625	-0.621306	5.11321	0.380098	-0.537322	5.11321	0.463185	-1.28675	5.11321	0.00735673	ENSG00000100417
ENSG00000100418	0.212575	4.914	0.786331	0.453168	4.914	0.546255	0.0938184	4.914	0.905425	-0.726068	4.914	0.283591	ENSG00000100418
ENSG00000100422	-1.26833	3.51806	0.0210096	-1.25979	3.51806	0.0234696	-0.449552	3.51806	0.551555	-1.10063	3.51806	0.0662627	ENSG00000100422
ENSG00000100425	0.0941344	4.33489	0.905059	-0.00565206	4.33489	0.995001	-0.276354	4.33489	0.723983	-0.0639231	4.33489	0.936387	ENSG00000100425
ENSG00000100426	-0.12854	4.63527	0.871993	-0.249286	4.63527	0.7511	-0.248138	4.63527	0.752374	-1.26476	4.63527	0.0143533	ENSG00000100426
ENSG00000100429	-0.734222	3.03728	0.298305	-1.08608	3.03728	0.0913972	-0.555776	3.03728	0.452745	-1.4314	3.03728	0.0209514	ENSG00000100429
ENSG00000100439	0.207832	3.8382	0.791105	-0.0322446	3.8382	0.967846	0.618996	3.8382	0.38305	0.473272	3.8382	0.526712	ENSG00000100439
ENSG00000100441	0.24655	4.25131	0.752286	0.661713	4.25131	0.341484	-0.0277202	4.25131	0.97295	-0.109861	4.25131	0.890067	ENSG00000100441
ENSG00000100442	0.14149	6.24928	0.858655	0.239031	6.24928	0.759793	-0.110164	6.24928	0.891349	0.00796887	6.24928	0.991705	ENSG00000100442
ENSG00000100461	0.130284	6.05002	0.868958	0.233236	6.05002	0.765638	0.130595	6.05002	0.868633	0.970808	6.05002	0.0822682	ENSG00000100461
ENSG00000100478	0.0617563	3.13649	0.937728	0.384093	3.13649	0.615053	-0.244254	3.13649	0.755318	0.719031	3.13649	0.298842	ENSG00000100478
ENSG00000100479	-0.380485	3.88151	0.619503	-0.628277	3.88151	0.376825	-0.172176	3.88151	0.828263	0.166585	3.88151	0.83263	ENSG00000100479
ENSG00000100483	0.178718	3.37826	0.820256	0.0207438	3.37826	0.978996	-0.385955	3.37826	0.613787	0.405562	3.37826	0.59405	ENSG00000100483
ENSG00000100485	-0.210313	5.54626	0.790115	-0.195875	5.54626	0.804539	-0.111082	5.54626	0.889919	-0.849658	5.54626	0.173712	ENSG00000100485
ENSG00000100503	0.270817	6.86392	0.728025	0.318462	6.86392	0.68073	-0.304494	6.86392	0.696326	-0.407623	6.86392	0.594585	ENSG00000100503
ENSG00000100504	-0.376615	6.22862	0.624684	-0.868066	6.22862	0.155296	-0.0397928	6.22862	0.961189	-0.580563	6.22862	0.420133	ENSG00000100504
ENSG00000100519	0.385125	5.58426	0.616166	0.424689	5.58426	0.577002	-0.0442653	5.58426	0.956698	-0.0749832	5.58426	0.925865	ENSG00000100519
ENSG00000100522	0.11617	5.1399	0.883473	0.302419	5.1399	0.696601	-0.242714	5.1399	0.757781	-0.0732144	5.1399	0.927409	ENSG00000100522
ENSG00000100523	-0.218196	3.79851	0.782044	-0.357855	3.79851	0.642127	-0.223636	3.79851	0.776765	-0.759556	3.79851	0.263026	ENSG00000100523
ENSG00000100526	-0.156759	5.85564	0.843737	-0.732468	5.85564	0.272783	0.573942	5.85564	0.424788	0.428761	5.85564	0.571865	ENSG00000100526
ENSG00000100528	-0.252575	6.33426	0.747906	-0.29618	6.33426	0.704527	0.232107	6.33426	0.766624	-0.145624	6.33426	0.85491	ENSG00000100528
ENSG00000100532	-0.0224543	3.61888	0.977917	0.14303	3.61888	0.856152	0.423671	3.61888	0.575214	0.689186	3.61888	0.322796	ENSG00000100532
ENSG00000100554	0.123664	6.51833	0.876005	-0.0795637	6.51833	0.921498	0.184447	6.51833	0.814349	-0.235363	6.51833	0.765035	ENSG00000100554
ENSG00000100558	0.996224	4.40375	0.0832175	1.26213	4.40375	0.00947186	0.539374	4.40375	0.459784	-0.290103	4.40375	0.709161	ENSG00000100558
ENSG00000100567	0.714665	6.82629	0.290289	0.990637	6.82629	0.0798002	0.460076	6.82629	0.539045	0.987149	6.82629	0.0823067	ENSG00000100567
ENSG00000100568	-0.256749	4.16669	0.743609	-0.320885	4.16669	0.679348	-0.653632	4.16669	0.350531	-0.934866	4.16669	0.130641	ENSG00000100568
ENSG00000100575	0.0975989	4.34337	0.901718	-0.544598	4.34337	0.456362	0.0398738	4.34337	0.959505	1.27728	4.34337	0.0076734	ENSG00000100575
ENSG00000100577	-0.00389184	5.43131	0.998388	-0.214895	5.43131	0.787604	-1.06448	5.43131	0.0906864	-0.789729	5.43131	0.257245	ENSG00000100577
ENSG00000100578	-0.0339311	4.87057	0.967071	-0.782378	4.87057	0.238879	-0.326806	4.87057	0.674122	0.00819806	4.87057	0.990909	ENSG00000100578
ENSG00000100580	-0.588252	5.68912	0.413144	-0.796926	5.68912	0.21802	-0.263065	5.68912	0.737693	-1.10922	5.68912	0.0375088	ENSG00000100580
ENSG00000100591	0.22021	8.16657	0.778361	0.10631	8.16657	0.892646	-0.219111	8.16657	0.781519	-0.112392	8.16657	0.88858	ENSG00000100591
ENSG00000100592	-0.0944898	7.4371	0.907976	-0.281067	7.4371	0.719605	0.077048	7.4371	0.924135	-0.987439	7.4371	0.0724945	ENSG00000100592
ENSG00000100596	-0.127044	7.28636	0.873926	0.190811	7.28636	0.807829	0.0385929	7.28636	0.960283	-1.28466	7.28636	0.00611915	ENSG00000100596
ENSG00000100600	0.950918	5.97162	0.118696	2.02293	5.97162	1.3e-06	0.70326	5.97162	0.306844	1.08205	5.97162	0.0589207	ENSG00000100600
ENSG00000100601	0.730558	2.09363	0.322247	0.316873	2.09363	0.691328	0.229685	2.09363	0.77236	1.45982	2.09363	0.0212469	ENSG00000100601
ENSG00000100603	0.233187	7.41024	0.765512	0.34093	7.41024	0.658452	-0.202174	7.41024	0.79822	0.69802	7.41024	0.306803	ENSG00000100603
ENSG00000100605	-0.655386	5.67506	0.346275	-1.12928	5.67506	0.0250244	-0.360224	5.67506	0.641441	-0.948068	5.67506	0.101565	ENSG00000100605
ENSG00000100612	0.407792	5.82352	0.591652	0.450483	5.82352	0.54977	-0.00322521	5.82352	0.998629	-0.106187	5.82352	0.895322	ENSG00000100612
ENSG00000100614	-0.358968	5.87974	0.642791	-0.187405	5.87974	0.812997	0.0939247	5.87974	0.906634	0.808254	5.87974	0.202275	ENSG00000100614
ENSG00000100625	0.362732	4.28445	0.636185	0.0780122	4.28445	0.921244	0.217346	4.28445	0.78139	1.01287	4.28445	0.076987	ENSG00000100625
ENSG00000100629	-0.129039	5.05052	0.871466	-0.107784	5.05052	0.892732	-0.236581	5.05052	0.763888	-0.457183	5.05052	0.543148	ENSG00000100629
ENSG00000100632	0.0795343	9.60684	0.919364	0.148389	9.60684	0.850345	-0.0767993	9.60684	0.924367	0.64427	9.60684	0.355781	ENSG00000100632
ENSG00000100644	0.852504	7.66529	0.162801	1.37479	7.66529	0.000611235	1.03262	7.66529	0.048003	1.14246	7.66529	0.016451	ENSG00000100644
ENSG00000100647	0.793421	6.63639	0.219117	1.22038	6.63639	0.010928	0.975202	6.63639	0.0865594	0.486475	6.63639	0.512801	ENSG00000100647
ENSG00000100650	0.0983485	8.5533	0.900996	0.139089	8.5533	0.860031	0.0605474	8.5533	0.938811	-0.33714	8.5533	0.664128	ENSG00000100650
ENSG00000100664	0.122682	6.35049	0.877386	0.594905	6.35049	0.403921	0.393126	6.35049	0.608868	1.13531	6.35049	0.0186111	ENSG00000100664
ENSG00000100697	0.243295	6.18026	0.755537	0.103405	6.18026	0.897501	-0.123993	6.18026	0.877697	0.529202	6.18026	0.469761	ENSG00000100697
ENSG00000100711	-0.422089	5.56424	0.578995	-0.370961	5.56424	0.630078	-0.432539	5.56424	0.568574	-1.28126	5.56424	0.00790049	ENSG00000100711
ENSG00000100714	-0.114353	5.85167	0.886918	-0.408569	5.85167	0.594645	0.132814	5.85167	0.867429	-0.371002	5.85167	0.63103	ENSG00000100714
ENSG00000100722	-0.197105	5.08997	0.803294	-0.218909	5.08997	0.781454	-0.0578624	5.08997	0.94292	0.143334	5.08997	0.855982	ENSG00000100722
ENSG00000100731	-0.0322257	5.45843	0.968571	0.472627	5.45843	0.528032	-0.0124601	5.45843	0.988348	-1.51113	5.45843	0.000556038	ENSG00000100731
ENSG00000100744	-0.302247	4.15882	0.697674	0.0380433	4.15882	0.961532	0.369394	4.15882	0.629955	1.02198	4.15882	0.0733478	ENSG00000100744
ENSG00000100749	-0.0228423	6.1253	0.977971	-0.2125	6.1253	0.787895	0.0730785	6.1253	0.927323	0.337603	6.1253	0.66206	ENSG00000100749
ENSG00000100764	0.129748	8.14271	0.86864	0.0655673	8.14271	0.932872	-0.482743	8.14271	0.519206	-0.247807	8.14271	0.753633	ENSG00000100764
ENSG00000100767	-0.185815	4.1012	0.814894	-0.510063	4.1012	0.492044	-0.0824295	4.1012	0.918535	-0.855037	4.1012	0.19155	ENSG00000100767
ENSG00000100784	-0.0881454	4.86011	0.912371	0.521595	4.86011	0.477463	0.371127	4.86011	0.628962	-0.401211	4.86011	0.599117	ENSG00000100784
ENSG00000100796	0.202235	6.74573	0.796537	0.169818	6.74573	0.829255	-0.149411	6.74573	0.851156	1.06527	6.74573	0.0363051	ENSG00000100796
ENSG00000100802	-0.0271336	2.00433	0.972227	0.241831	2.00433	0.758662	0.447709	2.00433	0.554318	0.0513179	2.00433	0.950559	ENSG00000100802
ENSG00000100804	-0.122374	7.03122	0.879263	-0.16597	7.03122	0.834564	0.0086369	7.03122	0.991002	-1.13279	7.03122	0.0206616	ENSG00000100804
ENSG00000100811	-0.181408	7.05377	0.819163	-0.00884034	7.05377	0.992039	-0.0795888	7.05377	0.922497	0.177718	7.05377	0.822458	ENSG00000100811
ENSG00000100813	0.24896	7.62397	0.749743	0.234291	7.62397	0.764395	-0.466954	7.62397	0.534799	0.317117	7.62397	0.682059	ENSG00000100813
ENSG00000100814	0.391796	4.35806	0.607172	-0.126304	4.35806	0.87383	0.700438	4.35806	0.305955	1.59011	4.35806	0.000266058	ENSG00000100814
ENSG00000100815	0.300175	7.36331	0.698842	0.153159	7.36331	0.846009	0.0492571	7.36331	0.950306	0.306633	7.36331	0.692471	ENSG00000100815
ENSG00000100823	0.386292	6.49377	0.61287	0.393371	6.49377	0.605815	-0.254304	6.49377	0.746549	0.229285	6.49377	0.769454	ENSG00000100823
ENSG00000100836	-0.321463	5.48188	0.679974	-0.21584	5.48188	0.785436	-0.326633	5.48188	0.674854	0.234652	5.48188	0.763904	ENSG00000100836
ENSG00000100852	0.112873	6.10432	0.886485	0.474453	6.10432	0.525226	0.140957	6.10432	0.85821	0.163191	6.10432	0.835863	ENSG00000100852
ENSG00000100865	0.0889061	3.72268	0.910416	0.0745635	3.72268	0.924881	-0.0303188	3.72268	0.970395	-0.424688	3.72268	0.575079	ENSG00000100865
ENSG00000100867	-1.16378	2.45492	0.0711444	-1.55497	2.45492	0.011983	-2.21351	2.45492	0.000154382	-0.915715	2.45492	0.188962	ENSG00000100867
ENSG00000100883	0.41193	6.90853	0.588937	0.636986	6.90853	0.362206	0.30127	6.90853	0.697758	0.854987	6.90853	0.160964	ENSG00000100883
ENSG00000100888	0.202711	7.66443	0.796001	0.634014	7.66443	0.365028	-0.263371	7.66443	0.737183	0.102308	7.66443	0.898283	ENSG00000100888
ENSG00000100889	-0.330165	3.40999	0.669195	-0.44209	3.40999	0.558141	0.531035	3.40999	0.468888	-0.517657	3.40999	0.485719	ENSG00000100889
ENSG00000100890	0.648103	2.88902	0.362319	0.449846	2.88902	0.550854	0.340236	2.88902	0.658245	1.06779	2.88902	0.0793811	ENSG00000100890
ENSG00000100897	-0.299467	5.83628	0.701257	-0.525234	5.83628	0.475197	-0.0801798	5.83628	0.920701	-0.543498	5.83628	0.456919	ENSG00000100897
ENSG00000100902	0.941282	3.35949	0.151604	1.5428	3.35949	0.00423318	0.236067	3.35949	0.763218	1.47069	3.35949	0.00857105	ENSG00000100902
ENSG00000100906	1.36779	10.0481	0.000604988	2.42019	10.0481	6.32e-15	1.39755	10.0481	0.000340703	2.26993	10.0481	1.36e-13	ENSG00000100906
ENSG00000100908	-0.155327	3.13804	0.844541	-0.412513	3.13804	0.587596	0.1385	3.13804	0.860304	0.498842	3.13804	0.502426	ENSG00000100908
ENSG00000100911	0.926334	7.05788	0.106824	1.25337	7.05788	0.00370068	0.640966	7.05788	0.358233	-0.160875	7.05788	0.839544	ENSG00000100911
ENSG00000100916	-0.15917	3.73332	0.840933	-0.154432	3.73332	0.845569	-0.0296894	3.73332	0.971062	-0.172899	3.73332	0.826707	ENSG00000100916
ENSG00000100918	0.136742	1.95683	0.864011	0.701811	1.95683	0.333187	0.0678635	1.95683	0.931726	0.45936	1.95683	0.552342	ENSG00000100918
ENSG00000100926	0.0130309	4.81795	0.986125	-0.23574	4.81795	0.764601	0.319078	4.81795	0.679753	-0.718226	4.81795	0.293387	ENSG00000100926
ENSG00000100934	-0.244234	5.55545	0.756248	-0.167057	5.55545	0.8334	-0.00260129	5.55545	0.998258	-0.345262	5.55545	0.655433	ENSG00000100934
ENSG00000100938	-0.342663	5.23315	0.658105	-0.57184	5.23315	0.428781	0.136297	5.23315	0.863289	-0.45901	5.23315	0.541788	ENSG00000100938
ENSG00000100941	0.171792	8.48609	0.827535	-0.092066	8.48609	0.909614	0.0600842	8.48609	0.940198	0.47071	8.48609	0.530955	ENSG00000100941
ENSG00000100949	0.337742	3.00145	0.661198	0.410942	3.00145	0.588829	0.239841	3.00145	0.758603	-0.073382	3.00145	0.92562	ENSG00000100949
ENSG00000100968	0.0880077	1.1857	0.926356	0.390817	1.1857	0.659093	1.28485	1.1857	0.0848774	3.20631	1.1857	8.68e-07	ENSG00000100968
ENSG00000100983	0.0426511	6.30825	0.955503	-0.231313	6.30825	0.770454	-0.671693	6.30825	0.339668	-0.0575521	6.30825	0.944147	ENSG00000100983
ENSG00000100991	-0.223566	3.9469	0.776622	0.00616452	3.9469	0.993249	-0.193223	3.9469	0.807183	-1.04866	3.9469	0.0817533	ENSG00000100991
ENSG00000100994	-0.641462	6.03595	0.361006	-0.880559	6.03595	0.149673	-0.577573	6.03595	0.423602	-0.766584	6.03595	0.244306	ENSG00000100994
ENSG00000100997	-0.243929	5.0881	0.75651	-0.23797	5.0881	0.76243	-0.191572	5.0881	0.8089	-0.0903402	5.0881	0.910205	ENSG00000100997
ENSG00000101000	0.128419	4.97373	0.869944	-0.124726	4.97373	0.876928	0.732194	4.97373	0.294387	0.44765	4.97373	0.555616	ENSG00000101000
ENSG00000101003	-0.276129	5.5704	0.724427	-0.0788785	5.5704	0.921936	-0.0531565	5.5704	0.947762	-0.0864698	5.5704	0.91421	ENSG00000101003
ENSG00000101017	1.09892	3.64537	0.0623396	2.79767	3.64537	5.47e-11	0.242846	3.64537	0.75603	0.713477	3.64537	0.310364	ENSG00000101017
ENSG00000101019	0.107487	4.47184	0.892086	-0.0340141	4.47184	0.966629	-0.0272237	4.47184	0.973584	-0.316807	4.47184	0.683198	ENSG00000101019
ENSG00000101040	-0.0237651	6.84283	0.977094	0.285619	6.84283	0.713343	0.610628	6.84283	0.38811	0.608457	6.84283	0.390433	ENSG00000101040
ENSG00000101052	-0.088092	3.72469	0.912346	-0.0301616	3.72469	0.970341	0.115846	3.72469	0.882948	-0.0511512	3.72469	0.948935	ENSG00000101052
ENSG00000101057	-1.47644	7.48832	0.00696111	-1.50343	7.48832	0.00579325	-1.21092	7.48832	0.0392215	-0.92529	7.48832	0.156717	ENSG00000101057
ENSG00000101079	-1.44166	5.66266	0.00100496	-2.07151	5.66266	2.22e-07	-0.398335	5.66266	0.602988	-0.3623	5.66266	0.638827	ENSG00000101079
ENSG00000101104	-0.219946	3.42831	0.781364	-0.209674	3.42831	0.791464	0.210068	3.42831	0.788498	-0.78085	3.42831	0.280254	ENSG00000101104
ENSG00000101109	-0.115491	7.27448	0.885517	0.352115	7.27448	0.647849	-0.329169	7.27448	0.671953	-1.17988	7.27448	0.0120069	ENSG00000101109
ENSG00000101126	0.058279	5.95052	0.941189	-0.249075	5.95052	0.751372	0.151895	5.95052	0.847187	1.04878	5.95052	0.044908	ENSG00000101126
ENSG00000101132	-0.0405005	5.97021	0.960419	0.0677008	5.97021	0.932182	0.0432915	5.97021	0.956479	-0.24253	5.97021	0.757897	ENSG00000101132
ENSG00000101138	-0.0194122	3.90755	0.981311	-0.371314	3.90755	0.628647	-0.0299891	3.90755	0.970827	-0.374416	3.90755	0.62535	ENSG00000101138
ENSG00000101146	-0.12491	6.39767	0.875783	-0.153874	6.39767	0.846633	-0.145316	6.39767	0.855279	1.46723	6.39767	0.000130173	ENSG00000101146
ENSG00000101150	-0.00813654	7.48969	0.993005	0.0924759	7.48969	0.906371	-0.383477	7.48969	0.618039	-0.0789635	7.48969	0.922105	ENSG00000101150
ENSG00000101152	-0.269674	6.75286	0.731878	-0.235033	6.75286	0.766459	0.0348975	6.75286	0.96348	-2.18637	6.75286	8.64e-07	ENSG00000101152
ENSG00000101158	0.304418	5.6411	0.694637	0.0697058	5.6411	0.929953	0.401398	5.6411	0.599222	-0.493696	5.6411	0.506632	ENSG00000101158
ENSG00000101160	-0.547578	6.62103	0.46498	-1.14954	6.62103	0.0668096	-0.593583	6.62103	0.422351	0.0908711	6.62103	0.906394	ENSG00000101160
ENSG00000101161	-0.251036	7.86423	0.750201	-0.403157	7.86423	0.598483	-0.754984	7.86423	0.255745	-1.12109	7.86423	0.0331411	ENSG00000101161
ENSG00000101166	-0.0913223	4.92143	0.909227	-0.0604839	4.92143	0.940094	0.0594965	4.92143	0.939982	0.550435	4.92143	0.448846	ENSG00000101166
ENSG00000101181	0.389901	4.86593	0.610175	0.397987	4.86593	0.602112	0.145986	4.86593	0.853201	-0.704949	4.86593	0.302494	ENSG00000101181
ENSG00000101182	0.0556083	9.51561	0.944988	0.0963348	9.51561	0.905066	0.0330621	9.51561	0.967083	-0.226503	9.51561	0.774074	ENSG00000101182
ENSG00000101187	0.397137	5.89165	0.602745	0.945487	5.89165	0.0971847	-0.0994031	5.89165	0.901338	-0.440301	5.89165	0.560459	ENSG00000101187
ENSG00000101189	-0.0847573	5.57264	0.917052	0.110011	5.57264	0.891308	0.240525	5.57264	0.758293	-0.196937	5.57264	0.803392	ENSG00000101189
ENSG00000101190	-0.563844	3.67362	0.438457	-1.21431	3.67362	0.0295458	-0.304558	3.67362	0.695745	0.210992	3.67362	0.78803	ENSG00000101190
ENSG00000101191	-0.0983736	5.41498	0.902325	-0.02062	5.41498	0.980128	-0.254921	5.41498	0.745606	0.167654	5.41498	0.831408	ENSG00000101191
ENSG00000101193	-0.323473	6.0345	0.677477	-0.199558	6.0345	0.801041	-0.0961241	6.0345	0.904772	-0.0868196	6.0345	0.913982	ENSG00000101193
ENSG00000101194	-0.156418	3.4248	0.843971	-0.456401	3.4248	0.54579	0.537294	3.4248	0.464066	-0.445781	3.4248	0.556576	ENSG00000101194
ENSG00000101199	-0.432784	5.32555	0.570445	-0.548698	5.32555	0.457861	-0.898774	5.32555	0.164413	-2.22404	5.32555	2.28e-05	ENSG00000101199
ENSG00000101210	-2.7781	1.80999	0.00116328	-1.94476	1.80999	0.015756	0.397091	1.80999	0.613899	-0.616752	1.80999	0.449862	ENSG00000101210
ENSG00000101216	-0.137851	4.78158	0.862764	-0.0400382	4.78158	0.960746	0.00443128	4.78158	0.994672	-1.33282	4.78158	0.00774739	ENSG00000101216
ENSG00000101220	-1.023	3.35396	0.093433	-0.869043	3.35396	0.182521	-0.293663	3.35396	0.706585	-0.903067	3.35396	0.16543	ENSG00000101220
ENSG00000101224	0.819018	9.09053	0.195458	0.904542	9.09053	0.128643	-0.166134	9.09053	0.834863	-1.82526	9.09053	2.76e-06	ENSG00000101224
ENSG00000101236	0.389996	5.07317	0.610088	1.03108	5.07317	0.0610257	0.914462	5.07317	0.124414	1.54835	5.07317	9.56e-05	ENSG00000101236
ENSG00000101246	-0.0991227	4.91999	0.901652	0.0122333	4.91999	0.986835	-0.485522	4.91999	0.515376	-1.45208	4.91999	0.00271767	ENSG00000101246
ENSG00000101247	-0.23927	2.94012	0.760236	-0.204889	2.94012	0.79454	0.197066	2.94012	0.80141	0.303241	2.94012	0.69624	ENSG00000101247
ENSG00000101255	-0.390124	4.5254	0.609533	0.231614	4.5254	0.767378	-0.055401	4.5254	0.945129	2.03899	4.5254	3.26e-08	ENSG00000101255
ENSG00000101266	-0.0368559	6.56359	0.964098	-0.01334	6.56359	0.987519	-0.312679	6.56359	0.68821	-0.664666	6.56359	0.336995	ENSG00000101266
ENSG00000101290	-0.171343	4.97257	0.829091	-0.204872	4.97257	0.795503	0.183426	4.97257	0.815455	-0.600887	4.97257	0.400605	ENSG00000101290
ENSG00000101294	-0.39638	7.12676	0.605216	-0.293824	7.12676	0.707527	-0.543595	7.12676	0.458307	-0.764838	7.12676	0.248516	ENSG00000101294
ENSG00000101298	-0.694915	3.27866	0.322852	-1.1838	3.27866	0.0487375	-0.0631728	3.27866	0.937734	-1.16087	3.27866	0.0606803	ENSG00000101298
ENSG00000101307	3.07008	2.70703	7.42e-08	3.59933	2.70703	4.52e-10	2.47281	2.70703	1.73e-05	1.11341	2.70703	0.13964	ENSG00000101307
ENSG00000101310	0.447954	5.74567	0.552427	0.443561	5.74567	0.556845	0.00934588	5.74567	0.990099	1.25408	5.74567	0.00509043	ENSG00000101310
ENSG00000101311	0.942058	1.78748	0.168987	0.870129	1.78748	0.215705	-1.08363	1.78748	0.132201	-1.64349	1.78748	0.0400196	ENSG00000101311
ENSG00000101335	-1.78394	5.74127	0.0026566	-2.20452	5.74127	0.000192159	-1.11931	5.74127	0.086678	-1.0144	5.74127	0.135485	ENSG00000101335
ENSG00000101337	0.180141	4.94271	0.818777	0.0803378	4.94271	0.919217	-0.206285	4.94271	0.794149	0.160137	4.94271	0.839062	ENSG00000101337
ENSG00000101342	0.810568	4.13222	0.221445	1.13762	4.13222	0.0453039	-0.186124	4.13222	0.81414	-0.734996	4.13222	0.298762	ENSG00000101342
ENSG00000101343	0.162569	5.5514	0.836486	0.0394626	5.5514	0.960066	-0.0995054	5.5514	0.901241	0.0332812	5.5514	0.96627	ENSG00000101343
ENSG00000101346	-0.267951	4.73614	0.732532	-0.182599	4.73614	0.817845	-0.171143	4.73614	0.829418	-1.43312	4.73614	0.00253245	ENSG00000101346
ENSG00000101347	0.883566	9.11083	0.137938	1.11206	9.11083	0.0226474	-0.0406932	9.11083	0.960402	-0.720193	9.11083	0.283995	ENSG00000101347
ENSG00000101350	0.147224	6.19166	0.85214	0.106894	6.19166	0.892846	-0.204579	6.19166	0.795832	-0.55771	6.19166	0.442661	ENSG00000101350
ENSG00000101353	0.422933	0.910985	0.648246	-0.527784	0.910985	0.601069	0.67421	0.910985	0.435327	4.53002	0.910985	9.92e-11	ENSG00000101353
ENSG00000101361	0.0281589	8.27091	0.971805	0.0548257	8.27091	0.945563	0.00784118	8.27091	0.991773	0.153484	8.27091	0.846679	ENSG00000101361
ENSG00000101363	-0.524131	4.38039	0.476538	-0.496655	4.38039	0.50383	-0.431689	4.38039	0.568814	-0.177717	4.38039	0.822533	ENSG00000101363
ENSG00000101365	0.0719415	5.5034	0.927109	-0.00783947	5.5034	0.993007	-0.0411413	5.5034	0.959756	-0.0572917	5.5034	0.943397	ENSG00000101365
ENSG00000101367	0.256904	5.55081	0.741985	0.319461	5.55081	0.679666	-0.0939075	5.55081	0.907801	-0.520617	5.55081	0.479734	ENSG00000101367
ENSG00000101384	1.66172	6.08251	9.69e-07	1.37527	6.08251	0.000714131	0.0900113	6.08251	0.909985	0.310622	6.08251	0.688599	ENSG00000101384
ENSG00000101391	-0.0972328	4.75204	0.903376	-0.0757545	4.75204	0.92486	-0.341438	4.75204	0.659202	-1.48232	4.75204	0.00146441	ENSG00000101391
ENSG00000101400	-1.62371	4.32093	0.00102296	-2.02326	4.32093	2.89e-05	-0.960946	4.32093	0.117059	-0.939387	4.32093	0.13556	ENSG00000101400
ENSG00000101407	0.0556099	3.973	0.943628	0.179165	3.973	0.819824	0.351368	3.973	0.647351	-0.188257	3.973	0.811334	ENSG00000101407
ENSG00000101412	-1.02306	7.08373	0.0941367	-1.65702	7.08373	0.00103721	0.0800757	7.08373	0.917602	-0.43926	7.08373	0.564517	ENSG00000101412
ENSG00000101413	0.166494	5.2785	0.832485	-2.69e-05	5.2785	1.0007	-0.121167	5.2785	0.879392	0.463942	5.2785	0.535627	ENSG00000101413
ENSG00000101417	-0.848572	4.12851	0.182269	-1.77355	4.12851	5.25e-05	-0.00675175	4.12851	0.994228	-1.63778	4.12851	0.000468288	ENSG00000101417
ENSG00000101421	0.524086	8.72292	0.474805	0.719636	8.72292	0.282262	0.320937	8.72292	0.678222	1.71019	8.72292	6.68e-08	ENSG00000101421
ENSG00000101439	-0.063215	8.38191	0.937884	0.417853	8.38191	0.582555	-0.114358	8.38191	0.886603	0.365924	8.38191	0.634007	ENSG00000101439
ENSG00000101442	0.0740923	2.87316	0.925059	0.150107	2.87316	0.84896	-0.169421	2.87316	0.830808	-1.26931	2.87316	0.0454953	ENSG00000101442
ENSG00000101444	-0.252553	4.69782	0.74793	-0.154998	4.69782	0.845483	0.0294497	4.69782	0.969952	-0.963431	4.69782	0.105824	ENSG00000101444
ENSG00000101447	-0.535155	4.48134	0.467753	-0.975253	4.48134	0.111954	-0.55377	4.48134	0.449414	-0.248093	4.48134	0.752656	ENSG00000101447
ENSG00000101452	0.248497	2.48394	0.75058	-0.11931	2.48394	0.880074	-0.136009	2.48394	0.863949	-0.986119	2.48394	0.156943	ENSG00000101452
ENSG00000101457	0.0889166	5.58968	0.911664	-0.142124	5.58968	0.858645	0.0864182	5.58968	0.914193	-0.333676	5.58968	0.666837	ENSG00000101457
ENSG00000101460	-0.794008	3.83091	0.248718	-0.881117	3.83091	0.189923	-0.327104	3.83091	0.674545	0.152705	3.83091	0.846263	ENSG00000101460
ENSG00000101464	-0.33438	3.62446	0.666354	-0.6588	3.62446	0.35369	-0.608075	3.62446	0.398718	-1.12575	3.62446	0.0653362	ENSG00000101464
ENSG00000101474	0.0393757	6.58673	0.960243	-0.113169	6.58673	0.887693	0.466878	6.58673	0.533511	-0.321717	6.58673	0.679081	ENSG00000101474
ENSG00000101544	-0.32596	5.09968	0.674655	-0.141764	5.09968	0.858718	-0.114579	5.09968	0.886082	-0.948061	5.09968	0.109823	ENSG00000101544
ENSG00000101546	-0.541806	3.26485	0.464233	-1.12208	3.26485	0.0707195	-0.565769	3.26485	0.440823	-0.945274	3.26485	0.154809	ENSG00000101546
ENSG00000101557	-0.156211	7.27721	0.845827	0.21374	7.27721	0.784958	-0.454817	7.27721	0.551895	-0.944845	7.27721	0.0970356	ENSG00000101557
ENSG00000101558	-0.117222	7.44024	0.884626	-0.0125284	7.44024	0.988375	0.376709	7.44024	0.62596	0.247775	7.44024	0.750986	ENSG00000101558
ENSG00000101574	-0.203932	4.26041	0.796304	-0.0932817	4.26041	0.907103	-0.0350339	4.26041	0.965724	0.370671	4.26041	0.628758	ENSG00000101574
ENSG00000101577	-0.118655	5.90128	0.882613	0.180043	5.90128	0.819014	-0.137305	5.90128	0.863766	-0.188261	5.90128	0.812127	ENSG00000101577
ENSG00000101596	0.437333	8.01694	0.563913	0.778833	8.01694	0.226859	-0.172212	8.01694	0.828296	0.828073	8.01694	0.183112	ENSG00000101596
ENSG00000101605	-1.08059	1.71847	0.229595	-0.550104	1.71847	0.535092	-0.106015	1.71847	0.899809	2.12546	1.71847	0.00215109	ENSG00000101605
ENSG00000101608	0.196957	8.65156	0.801742	0.553835	8.65156	0.444822	-0.09924	8.65156	0.902314	0.755375	8.65156	0.248606	ENSG00000101608
ENSG00000101624	0.0928067	3.68165	0.906422	-0.383344	3.68165	0.616236	0.0697252	3.68165	0.929426	0.441604	3.68165	0.557836	ENSG00000101624
ENSG00000101639	-0.226153	5.3978	0.774314	-0.771087	5.3978	0.238512	-0.344427	5.3978	0.656552	-0.312559	5.3978	0.688009	ENSG00000101639
ENSG00000101654	0.237317	6.71879	0.761454	0.182313	6.71879	0.817135	-0.0919116	6.71879	0.910178	1.73735	6.71879	3.28e-08	ENSG00000101654
ENSG00000101665	-0.162902	2.4876	0.838178	-0.344864	2.4876	0.662699	0.287038	2.4876	0.714379	1.05563	2.4876	0.120353	ENSG00000101665
ENSG00000101670	3.7618	3.90994	1.33e-12	4.77783	3.90994	5.84e-17	2.63542	3.90994	2.97e-07	1.1141	3.90994	0.115804	ENSG00000101670
ENSG00000101745	0.693247	8.26932	0.311281	0.786288	8.26932	0.227669	0.315441	8.26932	0.683183	0.293285	8.26932	0.705309	ENSG00000101745
ENSG00000101751	0.0344355	2.9416	0.965544	0.420331	2.9416	0.58021	0.815675	2.9416	0.221085	1.07456	2.9416	0.0790095	ENSG00000101751
ENSG00000101752	-0.176357	5.89026	0.824099	-0.261202	5.89026	0.73932	-0.187418	5.89026	0.813035	-0.66734	5.89026	0.334924	ENSG00000101752
ENSG00000101773	-0.097028	7.07023	0.904604	-0.313205	7.07023	0.687688	-0.0163419	7.07023	0.984563	0.88055	7.07023	0.139944	ENSG00000101773
ENSG00000101782	-0.10148	6.69793	0.900247	-0.0678666	6.69793	0.933633	-0.168535	6.69793	0.831928	1.27255	6.69793	0.00279728	ENSG00000101782
ENSG00000101811	0.163136	4.27124	0.835882	0.135476	4.27124	0.863693	0.0993025	4.27124	0.899824	-0.198643	4.27124	0.801119	ENSG00000101811
ENSG00000101843	0.00480068	4.69399	0.993923	0.0378742	4.69399	0.960896	0.193662	4.69399	0.804701	0.464984	4.69399	0.535945	ENSG00000101843
ENSG00000101844	0.47397	4.91522	0.525855	-0.000276134	4.91522	1.00041	0.28204	4.91522	0.716827	0.0420646	4.91522	0.957696	ENSG00000101844
ENSG00000101846	-0.0844786	4.25591	0.915951	-0.469397	4.25591	0.530749	0.115925	4.25591	0.88299	0.0191439	4.25591	0.980432	ENSG00000101846
ENSG00000101849	-0.449383	5.36642	0.551456	-0.115906	5.36642	0.884662	0.154646	5.36642	0.844335	-1.85252	5.36642	3.57e-06	ENSG00000101849
ENSG00000101850	-0.197614	2.35321	0.810417	-0.121834	2.35321	0.882007	1.1962	2.35321	0.0869397	0.573626	2.35321	0.476604	ENSG00000101850
ENSG00000101856	-0.327362	4.78339	0.673284	-0.376602	4.78339	0.624072	0.226816	4.78339	0.771772	-0.067439	4.78339	0.933125	ENSG00000101856
ENSG00000101868	-0.31814	6.63739	0.682941	-0.579156	6.63739	0.422069	-0.166335	6.63739	0.834459	-0.136901	6.63739	0.863921	ENSG00000101868
ENSG00000101871	0.0522594	5.69026	0.946715	0.22668	5.69026	0.772075	-0.20236	5.69026	0.798331	-1.11415	5.69026	0.0396464	ENSG00000101871
ENSG00000101882	0.0928239	5.64971	0.90678	-0.22684	5.64971	0.77355	0.180871	5.64971	0.817965	0.526972	5.64971	0.472066	ENSG00000101882
ENSG00000101888	0.356697	4.6305	0.642952	0.852707	4.6305	0.174725	0.0365456	4.6305	0.963201	2.66247	4.6305	5.23e-16	ENSG00000101888
ENSG00000101901	-0.179837	3.41511	0.819796	-0.00010727	3.41511	1.0001	0.059039	3.41511	0.940146	0.546157	3.41511	0.456107	ENSG00000101901
ENSG00000101911	-0.666828	5.09485	0.336307	-0.867669	5.09485	0.160502	0.300612	5.09485	0.698327	-1.45842	5.09485	0.0014339	ENSG00000101911
ENSG00000101928	0.0302426	5.39168	0.969176	-0.233706	5.39168	0.766747	-0.122016	5.39168	0.878603	-0.362596	5.39168	0.63822	ENSG00000101928
ENSG00000101935	0.0734095	4.28253	0.926024	0.0394695	4.28253	0.960048	-0.05606	4.28253	0.944668	-1.21068	4.28253	0.0281717	ENSG00000101935
ENSG00000101940	-0.560281	5.13462	0.441882	-0.588451	5.13462	0.414443	-0.633997	5.13462	0.3701	-1.2734	5.13462	0.0145857	ENSG00000101940
ENSG00000101945	-0.791446	2.45681	0.258049	-0.387202	2.45681	0.613973	-0.234603	2.45681	0.765329	-1.30338	2.45681	0.0473563	ENSG00000101945
ENSG00000101955	-0.872583	2.8773	0.219047	-1.16324	2.8773	0.0902863	1.12814	2.8773	0.064392	0.644518	2.8773	0.378555	ENSG00000101955
ENSG00000101966	0.130654	6.44192	0.871758	0.321865	6.44192	0.677346	-0.0216458	6.44192	0.979216	0.405135	6.44192	0.602942	ENSG00000101966
ENSG00000101972	0.174029	7.63076	0.825477	0.353582	7.63076	0.647163	0.0581182	7.63076	0.942356	0.497211	7.63076	0.502669	ENSG00000101972
ENSG00000101974	-0.161092	6.23518	0.839374	-0.148866	6.23518	0.851625	0.521461	6.23518	0.477429	-0.537447	6.23518	0.462896	ENSG00000101974
ENSG00000102007	0.0488348	8.12253	0.949715	-0.345429	8.12253	0.656161	-0.1438	8.12253	0.85749	-0.287311	8.12253	0.714095	ENSG00000102007
ENSG00000102010	0.283485	1.70978	0.748098	1.64028	1.70978	0.0278842	1.25309	1.70978	0.100647	0.683424	1.70978	0.439106	ENSG00000102010
ENSG00000102024	0.16622	7.53874	0.832842	0.236642	7.53874	0.762065	0.227373	7.53874	0.771296	0.210495	7.53874	0.788251	ENSG00000102024
ENSG00000102030	-0.0744709	3.51549	0.926063	-0.378683	3.51549	0.621227	-0.266784	3.51549	0.733439	-0.926646	3.51549	0.150846	ENSG00000102030
ENSG00000102032	-0.0255259	3.0071	0.975515	-0.575832	3.0071	0.448403	0.195099	3.0071	0.804002	-1.71234	3.0071	0.0147587	ENSG00000102032
ENSG00000102034	0.0266195	5.79852	0.97266	0.534899	5.79852	0.463995	-0.068709	5.79852	0.93215	-1.1287	5.79852	0.0283015	ENSG00000102034
ENSG00000102038	0.162941	5.78683	0.836051	0.426572	5.78683	0.573419	0.193182	5.78683	0.805634	-0.736965	5.78683	0.269771	ENSG00000102038
ENSG00000102054	-0.00150788	8.22721	0.999432	0.105941	8.22721	0.895847	-0.265354	8.22721	0.735256	0.342607	8.22721	0.656845	ENSG00000102054
ENSG00000102078	-0.335196	4.41438	0.665218	-0.7563	4.41438	0.257445	-0.072169	4.41438	0.928556	0.336555	4.41438	0.662497	ENSG00000102078
ENSG00000102081	0.315786	7.56669	0.683364	0.790682	7.56669	0.216073	-0.0746634	7.56669	0.926589	0.642546	7.56669	0.356744	ENSG00000102081
ENSG00000102096	-0.701599	4.34085	0.331205	-1.13724	4.34085	0.079701	-0.743278	4.34085	0.296051	-0.108988	4.34085	0.892964	ENSG00000102096
ENSG00000102100	0.159647	4.85962	0.839128	0.0241793	4.85962	0.974908	-0.0400246	4.85962	0.960926	0.908939	4.85962	0.13879	ENSG00000102100
ENSG00000102103	0.115828	4.27167	0.883356	0.0963979	4.27167	0.902905	0.105086	4.27167	0.894018	0.113713	4.27167	0.885735	ENSG00000102103
ENSG00000102119	-0.53633	6.145	0.46521	-0.419973	6.145	0.581356	-0.548179	6.145	0.453419	-0.312539	6.145	0.68857	ENSG00000102119
ENSG00000102125	-0.519599	5.02453	0.482342	-0.741564	5.02453	0.273685	-0.220075	5.02453	0.780886	-0.134917	5.02453	0.865892	ENSG00000102125
ENSG00000102144	-0.0426266	7.31612	0.958456	-0.255519	7.31612	0.74498	0.201634	7.31612	0.797063	-0.373216	7.31612	0.628787	ENSG00000102144
ENSG00000102158	0.156484	6.31712	0.842852	0.438633	6.31712	0.562741	0.0724277	6.31712	0.927547	-0.291709	6.31712	0.708873	ENSG00000102158
ENSG00000102172	-0.200888	7.65174	0.799526	-0.0407717	7.65174	0.960306	-0.0908672	7.65174	0.910372	-0.151959	7.65174	0.848624	ENSG00000102172
ENSG00000102178	-0.970019	4.02235	0.10533	-1.3749	4.02235	0.00604195	-0.176402	4.02235	0.824256	-0.942155	4.02235	0.126366	ENSG00000102178
ENSG00000102181	-1.29429	5.02142	0.0148345	-1.32657	5.02142	0.0120886	-0.42294	5.02142	0.578939	-1.31539	5.02142	0.0145573	ENSG00000102181
ENSG00000102189	0.56652	7.36263	0.432072	0.248472	7.36263	0.750275	-0.00372436	7.36263	0.997173	0.0733348	7.36263	0.926339	ENSG00000102189
ENSG00000102218	-0.0669786	3.73071	0.933256	0.498241	3.73071	0.507361	0.160249	3.73071	0.838582	0.986676	3.73071	0.128413	ENSG00000102218
ENSG00000102221	-0.21005	2.99228	0.789223	0.292434	2.99228	0.706946	-0.327179	2.99228	0.672532	0.835896	2.99228	0.210093	ENSG00000102221
ENSG00000102225	-0.236146	6.84873	0.767346	-0.374884	6.84873	0.630129	-0.0717668	6.84873	0.931274	-0.0480343	6.84873	0.954858	ENSG00000102225
ENSG00000102226	0.118844	4.95247	0.880128	0.317347	4.95247	0.681631	-0.606223	4.95247	0.395605	-0.64015	4.95247	0.363972	ENSG00000102226
ENSG00000102241	0.00839679	6.35994	0.990994	0.142083	6.35994	0.857264	-0.190119	6.35994	0.810289	-0.11706	6.35994	0.883637	ENSG00000102241
ENSG00000102265	0.321685	7.57342	0.677517	0.197458	7.57342	0.801288	0.151805	7.57342	0.847541	-0.601495	7.57342	0.398972	ENSG00000102265
ENSG00000102287	0.643266	4.92721	0.376392	1.1641	4.92721	0.0588353	-0.0833759	4.92721	0.918845	0.272099	4.92721	0.728334	ENSG00000102287
ENSG00000102302	-0.696291	1.8749	0.346257	-0.196357	1.8749	0.802784	0.119172	1.8749	0.879888	-0.169726	1.8749	0.828622	ENSG00000102302
ENSG00000102309	-0.0385442	5.20426	0.962202	-0.144922	5.20426	0.855562	0.276486	5.20426	0.722397	-0.390262	5.20426	0.610387	ENSG00000102309
ENSG00000102312	-0.370786	2.21685	0.63578	-0.548764	2.21685	0.47502	0.416656	2.21685	0.587376	0.194411	2.21685	0.807941	ENSG00000102312
ENSG00000102316	-0.164504	5.94878	0.83595	0.0959244	5.94878	0.904136	0.00133665	5.94878	0.998118	-0.267677	5.94878	0.732786	ENSG00000102316
ENSG00000102317	0.289377	7.48283	0.709542	0.499244	7.48283	0.500479	-0.345502	7.48283	0.655796	-0.157416	7.48283	0.843634	ENSG00000102317
ENSG00000102359	-1.0755	3.5045	0.0982491	-0.554819	3.5045	0.456823	0.147021	3.5045	0.851404	-0.279263	3.5045	0.721974	ENSG00000102359
ENSG00000102362	-0.31049	6.68607	0.690375	-0.0787266	6.68607	0.922212	0.00694038	6.68607	0.992191	-0.795504	6.68607	0.214657	ENSG00000102362
ENSG00000102384	-0.164722	5.83316	0.836523	-0.537223	5.83316	0.465377	-0.249134	5.83316	0.75217	-2.17633	5.83316	2.12e-06	ENSG00000102384
ENSG00000102390	0.0924308	7.01764	0.908527	0.180443	7.01764	0.81887	-0.405478	7.01764	0.599919	-0.736603	7.01764	0.267982	ENSG00000102390
ENSG00000102393	0.27825	4.34041	0.72057	0.410326	4.34041	0.588754	0.543772	4.34041	0.455932	-0.4355	4.34041	0.564672	ENSG00000102393
ENSG00000102401	-0.591081	5.66833	0.409504	-0.470853	5.66833	0.530599	-0.346535	5.66833	0.654676	-0.661069	5.66833	0.34107	ENSG00000102401
ENSG00000102466	-0.75651	1.96486	0.2961	-1.17761	1.96486	0.0865279	0.0875224	1.96486	0.911302	-1.05956	1.96486	0.139068	ENSG00000102466
ENSG00000102471	-0.444665	4.19987	0.555745	-0.875247	4.19987	0.167302	-0.089325	4.19987	0.911379	0.0860467	4.19987	0.913227	ENSG00000102471
ENSG00000102524	3.84617	7.5953	7.4e-13	5.54182	7.5953	1.42e-18	0.0528617	7.5953	0.946865	2.79108	7.5953	6.05e-08	ENSG00000102524
ENSG00000102531	1.05983	6.14686	0.067775	1.32414	6.14686	0.00967693	0.542453	6.14686	0.458923	1.84646	6.14686	2.81e-05	ENSG00000102531
ENSG00000102543	-0.340641	4.2427	0.659313	0.0627718	4.2427	0.936543	0.206452	4.2427	0.792306	0.652422	4.2427	0.350793	ENSG00000102543
ENSG00000102547	0.262054	3.2783	0.738263	0.671649	3.2783	0.353485	-0.0110239	3.2783	0.989941	0.606318	3.2783	0.413545	ENSG00000102547
ENSG00000102554	-0.652727	2.14092	0.385252	-0.536149	2.14092	0.484482	-0.491811	2.14092	0.519234	1.49391	2.14092	0.0102321	ENSG00000102554
ENSG00000102572	0.0738987	3.7761	0.925438	0.688691	3.7761	0.322129	-0.111979	3.7761	0.888253	0.846222	3.7761	0.19403	ENSG00000102572
ENSG00000102580	0.539917	6.07427	0.458922	0.636096	6.07427	0.363383	0.461247	6.07427	0.539316	-0.21732	6.07427	0.783002	ENSG00000102580
ENSG00000102595	0.211779	5.34726	0.787104	-0.00372734	5.34726	0.99699	0.456324	5.34726	0.544691	0.0902542	5.34726	0.909704	ENSG00000102595
ENSG00000102606	0.0901912	4.88091	0.909082	-0.346217	4.88091	0.654205	0.211865	4.88091	0.786925	-0.593962	4.88091	0.407521	ENSG00000102606
ENSG00000102699	0.0664202	6.09112	0.932326	0.484803	6.09112	0.514512	-0.247617	6.09112	0.75341	0.463117	6.09112	0.536205	ENSG00000102699
ENSG00000102710	-0.00158744	4.74079	0.999135	-0.111508	4.74079	0.888895	-0.299498	4.74079	0.700903	0.929399	4.74079	0.116606	ENSG00000102710
ENSG00000102738	0.0559929	5.696	0.943951	0.260672	5.696	0.738267	-0.309461	5.696	0.691216	0.395118	5.696	0.60604	ENSG00000102738
ENSG00000102753	-0.0169463	6.95628	0.984013	-0.0376035	6.95628	0.963373	0.254017	6.95628	0.74457	-0.468141	6.95628	0.532913	ENSG00000102753
ENSG00000102755	1.24159	5.08134	0.0223122	1.31211	5.08134	0.0131704	1.08588	5.08134	0.0615285	0.498541	5.08134	0.504272	ENSG00000102755
ENSG00000102760	-1.05271	1.72668	0.200642	-2.80068	1.72668	0.00449243	0.391064	1.72668	0.624167	0.809829	1.72668	0.298751	ENSG00000102760
ENSG00000102763	-0.183328	2.76508	0.816865	-0.593343	2.76508	0.427752	0.131442	2.76508	0.867356	-0.328306	2.76508	0.674289	ENSG00000102763
ENSG00000102780	-0.214613	5.85975	0.785819	-0.277393	5.85975	0.72319	-0.115198	5.85975	0.886117	-0.951481	5.85975	0.10027	ENSG00000102780
ENSG00000102781	-0.642542	5.12622	0.359337	-0.638844	5.12622	0.363027	-0.382283	5.12622	0.620915	-1.67676	5.12622	5.24e-05	ENSG00000102781
ENSG00000102786	0.283221	5.82555	0.715781	0.542797	5.82555	0.456133	0.0978678	5.82555	0.901816	1.34276	5.82555	0.00140589	ENSG00000102786
ENSG00000102796	-0.164849	2.46132	0.833948	0.23642	2.46132	0.763872	-0.455721	2.46132	0.548406	2.23991	2.46132	3.25e-06	ENSG00000102796
ENSG00000102802	1.2895	4.59064	0.0240582	1.60941	4.59064	0.00202285	1.35292	4.59064	0.014815	0.150864	4.59064	0.849316	ENSG00000102802
ENSG00000102804	1.52288	6.59569	2.17e-05	1.45648	6.59569	0.000104376	0.0729328	6.59569	0.926673	0.641294	6.59569	0.358353	ENSG00000102804
ENSG00000102805	-0.261521	2.91264	0.738528	-0.566102	2.91264	0.450464	0.507434	2.91264	0.496582	1.79836	2.91264	0.000399309	ENSG00000102805
ENSG00000102858	0.281457	4.40822	0.717437	0.427477	4.40822	0.571737	0.0367051	4.40822	0.962566	-0.324868	4.40822	0.674847	ENSG00000102858
ENSG00000102870	-0.156964	4.64152	0.843552	-0.258287	4.64152	0.742136	-0.309122	4.64152	0.69145	-1.40683	4.64152	0.00376852	ENSG00000102870
ENSG00000102871	0.633175	5.11286	0.367213	1.59529	5.11286	2.37e-05	0.128746	5.11286	0.870634	-0.799983	5.11286	0.222734	ENSG00000102871
ENSG00000102882	-0.74755	6.20762	0.269719	-0.542866	6.20762	0.46068	-0.747364	6.20762	0.269357	-0.58777	6.20762	0.417334	ENSG00000102882
ENSG00000102890	-0.0260185	2.05078	0.974148	-0.125602	2.05078	0.874717	-0.254695	2.05078	0.747426	-1.44578	2.05078	0.0504952	ENSG00000102890
ENSG00000102893	-0.841908	4.48287	0.185363	-1.1291	4.48287	0.0373999	-0.351019	4.48287	0.649773	-0.827469	4.48287	0.199529	ENSG00000102893
ENSG00000102897	0.532687	5.00743	0.466433	0.896697	5.00743	0.139428	0.523565	5.00743	0.475328	2.93845	5.00743	4.42e-16	ENSG00000102897
ENSG00000102898	-0.0369543	7.54481	0.964124	-0.112172	7.54481	0.889031	0.173551	7.54481	0.825477	0.203517	7.54481	0.795216	ENSG00000102898
ENSG00000102900	-0.18421	8.20967	0.816851	0.150619	8.20967	0.847972	-0.047201	8.20967	0.954074	-0.350454	8.20967	0.651033	ENSG00000102900
ENSG00000102901	-0.651525	4.73025	0.353176	-0.829894	4.73025	0.196852	-0.690269	4.73025	0.316368	-1.01724	4.73025	0.0823447	ENSG00000102901
ENSG00000102908	0.460183	5.51399	0.538992	0.920852	5.51399	0.125473	0.0696062	5.51399	0.929296	0.973681	5.51399	0.0947511	ENSG00000102908
ENSG00000102910	-0.545257	6.07397	0.455434	-0.801098	6.07397	0.211701	-0.590521	6.07397	0.410339	-1.54709	6.07397	0.000225595	ENSG00000102910
ENSG00000102921	0.43948	6.54153	0.562648	0.765469	6.54153	0.239556	-0.014633	6.54153	0.986209	-0.670652	6.54153	0.331396	ENSG00000102921
ENSG00000102934	-0.562269	5.72545	0.438153	-0.726639	5.72545	0.278198	-0.220676	5.72545	0.779801	-0.511262	5.72545	0.489219	ENSG00000102934
ENSG00000102967	0.200093	3.05799	0.798675	-0.335533	3.05799	0.6645	-0.142311	3.05799	0.858098	-1.29245	3.05799	0.0366932	ENSG00000102967
ENSG00000102974	-0.0690691	7.34548	0.932035	-0.0849682	7.34548	0.916109	-0.332765	7.34548	0.668389	0.337282	7.34548	0.66222	ENSG00000102974
ENSG00000102977	0.314272	2.03024	0.686597	-0.00567617	2.03024	0.993038	0.269485	2.03024	0.729618	-0.356892	2.03024	0.64719	ENSG00000102977
ENSG00000102978	0.042699	3.70658	0.956592	0.0896702	3.70658	0.909552	0.066092	3.70658	0.932988	-0.274986	3.70658	0.724363	ENSG00000102978
ENSG00000102981	-1.04328	3.93884	0.0791077	-1.64102	3.93884	0.00113658	-0.177724	3.93884	0.823161	-0.917853	3.93884	0.149918	ENSG00000102981
ENSG00000102996	-0.69316	3.1839	0.324184	-0.658303	3.1839	0.355565	0.394292	3.1839	0.604189	-0.199228	3.1839	0.79986	ENSG00000102996
ENSG00000103005	0.353484	5.55131	0.646395	0.516827	5.55131	0.482157	0.370657	5.55131	0.629589	-0.180703	5.55131	0.819602	ENSG00000103005
ENSG00000103018	0.288491	5.37689	0.710497	0.389667	5.37689	0.611881	0.245141	5.37689	0.753691	-0.272599	5.37689	0.727703	ENSG00000103018
ENSG00000103024	-0.750352	3.08748	0.283302	-0.726784	3.08748	0.303839	0.508845	3.08748	0.492446	-0.69049	3.08748	0.337596	ENSG00000103024
ENSG00000103034	-0.0420019	7.9104	0.959967	0.123917	7.9104	0.87407	1.51217	7.9104	0.00134295	-0.822974	7.9104	0.211775	ENSG00000103034
ENSG00000103035	0.448351	7.13111	0.551264	0.449395	7.13111	0.550211	0.164386	7.13111	0.834419	-0.757604	7.13111	0.249925	ENSG00000103035
ENSG00000103037	0.0804155	3.16733	0.918904	-0.537209	3.16733	0.466661	0.220674	3.16733	0.777909	-0.953248	3.16733	0.150528	ENSG00000103037
ENSG00000103042	0.577473	4.80961	0.421863	0.131981	4.80961	0.867099	0.0778056	4.80961	0.921313	-0.845302	4.80961	0.185125	ENSG00000103042
ENSG00000103043	0.566298	1.92708	0.4474	0.83825	1.92708	0.228977	0.0396033	1.92708	0.960638	-0.818492	1.92708	0.28456	ENSG00000103043
ENSG00000103047	0.125793	4.01078	0.872993	0.00853692	4.01078	0.990614	0.0601201	4.01078	0.938658	-1.28004	4.01078	0.027979	ENSG00000103047
ENSG00000103051	-0.367774	4.60389	0.632847	-0.686831	4.60389	0.318546	-0.456905	4.60389	0.543637	-0.66859	4.60389	0.336361	ENSG00000103051
ENSG00000103056	-1.17023	1.56522	0.0977947	-1.12538	1.56522	0.117995	-0.479173	1.56522	0.531749	-2.04027	1.56522	0.00761782	ENSG00000103056
ENSG00000103064	-0.106888	3.31245	0.893353	-0.462113	3.31245	0.53861	-0.141401	3.31245	0.85897	-0.613927	3.31245	0.395497	ENSG00000103064
ENSG00000103066	-0.43788	4.32204	0.562435	-0.231889	4.32204	0.768396	-0.541877	4.32204	0.458915	-0.549396	4.32204	0.451904	ENSG00000103066
ENSG00000103091	-0.144388	3.99979	0.855937	-0.25106	3.99979	0.748959	0.0424753	3.99979	0.956787	-0.336153	3.99979	0.6635	ENSG00000103091
ENSG00000103111	-0.068398	6.56952	0.933102	-0.226559	6.56952	0.773844	-0.0588488	6.56952	0.942573	-0.786176	6.56952	0.222526	ENSG00000103111
ENSG00000103121	-0.14045	5.79157	0.860078	-0.424188	5.79157	0.576781	0.109444	5.79157	0.889701	0.559492	5.79157	0.439469	ENSG00000103121
ENSG00000103126	-0.42329	3.85355	0.576661	0.101263	3.85355	0.897925	0.194542	3.85355	0.804169	-0.626613	3.85355	0.380251	ENSG00000103126
ENSG00000103145	-0.891209	2.31842	0.19461	-1.86057	2.31842	0.00283607	-0.104643	2.31842	0.895871	0.219802	2.31842	0.780259	ENSG00000103145
ENSG00000103148	-0.000220308	2.89555	1.00009	-0.201773	2.89555	0.797402	0.471454	2.89555	0.528188	-1.36859	2.89555	0.0307034	ENSG00000103148
ENSG00000103150	-0.185606	3.78989	0.814939	-0.187695	3.78989	0.812725	0.160023	3.78989	0.838499	-1.56898	3.78989	0.00800079	ENSG00000103150
ENSG00000103160	-0.578862	4.6615	0.422218	-0.569454	4.6615	0.431544	-0.437681	4.6615	0.563165	-0.540159	4.6615	0.460591	ENSG00000103160
ENSG00000103168	-0.108509	2.26933	0.891609	0.00180602	2.26933	0.998202	-0.054494	2.26933	0.946112	-1.13197	2.26933	0.109986	ENSG00000103168
ENSG00000103174	-0.282261	5.07179	0.718324	-0.519936	5.07179	0.480596	-0.325817	5.07179	0.674926	-0.652165	5.07179	0.350751	ENSG00000103174
ENSG00000103187	0.147432	6.2836	0.851258	0.0402955	6.2836	0.958549	-0.781569	6.2836	0.231981	0.236353	6.2836	0.762354	ENSG00000103187
ENSG00000103194	0.244285	6.9841	0.754464	0.447384	6.9841	0.562009	0.0706476	6.9841	0.930383	0.646827	6.9841	0.352603	ENSG00000103194
ENSG00000103197	-0.132844	4.38772	0.867693	-0.262384	4.38772	0.737961	-0.0288715	4.38772	0.971988	-0.646353	4.38772	0.358301	ENSG00000103197
ENSG00000103199	-0.321715	4.00317	0.678833	-0.79348	4.00317	0.232795	-0.197946	4.00317	0.80277	-1.57718	4.00317	0.00244388	ENSG00000103199
ENSG00000103202	-1.00706	5.71961	0.0891676	-1.33344	5.71961	0.00952288	0.106225	5.71961	0.89214	-0.180886	5.71961	0.820398	ENSG00000103202
ENSG00000103222	0.0960803	3.65169	0.903031	-0.345678	3.65169	0.654033	-0.126045	3.65169	0.874446	-1.59341	3.65169	0.00318369	ENSG00000103222
ENSG00000103241	0.646929	4.43037	0.35872	1.57382	4.43037	0.000519667	0.369583	4.43037	0.629163	1.41163	4.43037	0.00389151	ENSG00000103241
ENSG00000103245	-0.0737607	3.52578	0.926736	-0.0315818	3.52578	0.968942	-0.0865208	3.52578	0.914113	-0.767725	3.52578	0.260924	ENSG00000103245
ENSG00000103248	0.142904	3.39858	0.856037	-0.0846346	3.39858	0.915511	0.00101519	3.39858	0.998196	-0.227447	3.39858	0.771868	ENSG00000103248
ENSG00000103249	-0.567744	5.23769	0.435674	-0.747933	5.23769	0.269002	-0.229804	5.23769	0.771383	-1.2566	5.23769	0.0199687	ENSG00000103249
ENSG00000103254	-0.382463	2.37473	0.622171	-0.191869	2.37473	0.808656	-0.151508	2.37473	0.849364	-1.00956	2.37473	0.162851	ENSG00000103254
ENSG00000103257	0.391135	6.2198	0.608279	0.303091	6.2198	0.695362	-1.28927	6.2198	0.025211	-1.34125	6.2198	0.0213599	ENSG00000103257
ENSG00000103260	-0.954301	3.04188	0.166504	-2.06698	3.04188	0.00115791	-0.357325	3.04188	0.647042	-0.527021	3.04188	0.489259	ENSG00000103260
ENSG00000103264	-0.23574	4.51333	0.764694	-0.264508	4.51333	0.735861	-0.103222	4.51333	0.89744	-1.72194	4.51333	0.000140292	ENSG00000103264
ENSG00000103274	-0.152413	4.55937	0.854159	0.200483	4.55937	0.801709	-0.937315	4.55937	0.210891	-0.627863	4.55937	0.43059	ENSG00000103274
ENSG00000103275	0.110577	6.92651	0.890825	0.0900428	6.92651	0.91116	0.137456	6.92651	0.863822	0.904544	6.92651	0.121996	ENSG00000103275
ENSG00000103313	3.06564	1.83374	0.0117921	5.95403	1.83374	8.48e-09	2.89025	1.83374	0.0140283	8.76166	1.83374	6.76e-17	ENSG00000103313
ENSG00000103319	-1.06753	3.48941	0.0707783	-2.02634	3.48941	2.32e-05	0.227096	3.48941	0.771485	-1.87379	3.48941	0.000193633	ENSG00000103319
ENSG00000103326	-0.425125	4.44627	0.575748	-0.197093	4.44627	0.80353	-0.398875	4.44627	0.60199	-1.39524	4.44627	0.00774512	ENSG00000103326
ENSG00000103335	0.130784	4.47964	0.868181	0.358654	4.47964	0.640337	-0.534022	4.47964	0.466861	-0.737769	4.47964	0.276802	ENSG00000103335
ENSG00000103342	-0.256152	8.07298	0.744391	-0.304794	8.07298	0.696143	-0.113908	8.07298	0.888108	-0.104005	8.07298	0.897961	ENSG00000103342
ENSG00000103351	-0.254845	4.06697	0.745393	-0.54644	4.06697	0.454878	-0.0598894	4.06697	0.940829	-0.729538	4.06697	0.285625	ENSG00000103351
ENSG00000103353	0.0136759	5.30888	0.985506	0.318076	5.30888	0.680958	-0.48292	5.30888	0.517674	0.749239	5.30888	0.257972	ENSG00000103353
ENSG00000103356	0.402066	2.65469	0.599211	0.50664	2.65469	0.498997	-0.056547	2.65469	0.943934	-2.03028	2.65469	0.00357121	ENSG00000103356
ENSG00000103363	-0.216898	5.80794	0.783542	-0.211972	5.80794	0.788458	-0.194063	5.80794	0.806391	0.241501	5.80794	0.75741	ENSG00000103363
ENSG00000103365	-0.292028	6.3199	0.708709	-0.933206	6.3199	0.105864	-0.0854822	6.3199	0.915764	-1.01761	6.3199	0.0602823	ENSG00000103365
ENSG00000103381	-0.683542	5.23798	0.319671	-0.209011	5.23798	0.791447	-0.254824	5.23798	0.745746	-1.17709	5.23798	0.0207726	ENSG00000103381
ENSG00000103404	-0.341754	4.1876	0.658383	-0.191282	4.1876	0.808958	-0.350504	4.1876	0.649799	-0.388468	4.1876	0.611347	ENSG00000103404
ENSG00000103415	-0.00867654	4.80186	0.992082	0.0171748	4.80186	0.982247	-0.407277	4.80186	0.593514	-0.284246	4.80186	0.715933	ENSG00000103415
ENSG00000103423	-0.0743266	4.84441	0.92623	-0.151347	4.84441	0.848999	0.371484	4.84441	0.628364	-0.0690906	4.84441	0.931263	ENSG00000103423
ENSG00000103429	0.0510287	6.33615	0.94913	0.254696	6.33615	0.744146	-0.186032	6.33615	0.814387	-0.214928	6.33615	0.785449	ENSG00000103429
ENSG00000103479	-0.198093	3.61339	0.802394	-0.600651	3.61339	0.411332	0.181093	3.61339	0.817409	0.0335361	3.61339	0.966058	ENSG00000103479
ENSG00000103490	-0.830572	4.50732	0.199114	-0.692014	4.50732	0.317227	0.0515023	4.50732	0.947325	-0.82865	4.50732	0.203974	ENSG00000103490
ENSG00000103494	0.059975	3.97104	0.939096	-0.185744	3.97104	0.814395	-0.162103	3.97104	0.838379	0.275367	3.97104	0.723769	ENSG00000103494
ENSG00000103496	0.3264	6.9519	0.672237	0.61415	6.9519	0.38738	-0.0997027	6.9519	0.901658	-0.446077	6.9519	0.555632	ENSG00000103496
ENSG00000103502	-0.254377	5.09651	0.746058	-0.542406	5.09651	0.458043	0.505745	5.09651	0.493217	-0.076582	5.09651	0.923951	ENSG00000103502
ENSG00000103507	-0.249526	4.57773	0.750904	-0.210921	4.57773	0.78947	0.326629	4.57773	0.672269	-0.847134	4.57773	0.184241	ENSG00000103507
ENSG00000103510	0.214808	2.98228	0.784087	0.0570974	2.98228	0.942564	0.564857	2.98228	0.437492	0.0566794	2.98228	0.943664	ENSG00000103510
ENSG00000103512	0.108838	5.15263	0.890666	0.145855	5.15263	0.853402	-0.128147	5.15263	0.872347	-0.0803982	5.15263	0.919977	ENSG00000103512
ENSG00000103540	-0.420089	6.16474	0.58333	-0.725924	6.16474	0.278368	-0.464124	6.16474	0.538169	0.153924	6.16474	0.845739	ENSG00000103540
ENSG00000103544	0.220364	5.18347	0.778528	0.222541	5.18347	0.776389	0.0438505	5.18347	0.956301	-0.249407	5.18347	0.750793	ENSG00000103544
ENSG00000103549	0.102319	3.02486	0.89689	0.0372747	3.02486	0.962386	-0.555097	3.02486	0.450669	-0.716414	3.02486	0.316086	ENSG00000103549
ENSG00000103550	0.631205	6.32064	0.367962	0.737339	6.32064	0.265779	-0.0937728	6.32064	0.90743	-0.914577	6.32064	0.121566	ENSG00000103550
ENSG00000103591	-0.322165	5.9086	0.678695	-0.316101	5.9086	0.684706	-0.359548	5.9086	0.641716	-0.613213	5.9086	0.387664	ENSG00000103591
ENSG00000103642	0.898349	7.40314	0.12646	1.20524	7.40314	0.00720917	-0.0368139	7.40314	0.964081	1.44132	7.40314	0.000115608	ENSG00000103642
ENSG00000103653	-0.219504	2.15845	0.781111	-0.131061	2.15845	0.868782	-0.791569	2.15845	0.270255	-0.802186	2.15845	0.281537	ENSG00000103653
ENSG00000103657	0.184128	5.40609	0.814756	-0.368456	5.40609	0.632549	-0.489592	5.40609	0.510874	-0.73754	5.40609	0.27011	ENSG00000103657
ENSG00000103671	0.245019	4.99238	0.753878	0.462577	4.99238	0.537033	-0.403082	4.99238	0.59777	0.107185	4.99238	0.89226	ENSG00000103671
ENSG00000103707	-0.400881	3.24395	0.600896	-0.649114	3.24395	0.368042	-0.130848	3.24395	0.870077	-1.41007	3.24395	0.0219869	ENSG00000103707
ENSG00000103769	-0.00876605	6.68417	0.992098	0.155571	6.68417	0.844579	0.0703853	6.68417	0.930284	-0.801414	6.68417	0.209166	ENSG00000103769
ENSG00000103811	-0.277549	3.51156	0.722065	-0.652425	3.51156	0.361431	0.772582	3.51156	0.248006	0.368119	3.51156	0.631671	ENSG00000103811
ENSG00000103852	-0.0601317	4.47265	0.940384	0.149303	4.47265	0.849736	-0.336196	4.47265	0.664051	1.30559	4.47265	0.00514727	ENSG00000103852
ENSG00000103855	-0.282522	4.64636	0.717842	-0.019247	4.64636	0.981453	-0.297796	4.64636	0.702672	0.277067	4.64636	0.721972	ENSG00000103855
ENSG00000103876	-1.46589	3.75064	0.00689723	-1.20685	3.75064	0.03879	0.0518318	3.75064	0.946715	-0.776897	3.75064	0.257158	ENSG00000103876
ENSG00000103888	1.20849	2.22431	0.103872	0.919341	2.22431	0.24133	0.464186	2.22431	0.570203	1.03904	2.22431	0.18652	ENSG00000103888
ENSG00000103932	-0.0791818	4.35249	0.921456	-0.0722887	4.35249	0.928312	-0.549213	4.35249	0.451668	-1.19329	4.35249	0.0284742	ENSG00000103932
ENSG00000103942	-0.223912	2.43313	0.779467	0.546136	2.43313	0.487519	-0.289047	2.43313	0.716298	4.47145	2.43313	2.83e-14	ENSG00000103942
ENSG00000103966	0.53776	5.98431	0.46111	1.0237	5.98431	0.0555596	-0.228227	5.98431	0.772149	0.124215	5.98431	0.8758	ENSG00000103966
ENSG00000103978	0.305107	6.28089	0.693796	0.327486	6.28089	0.671537	-0.066786	6.28089	0.934169	-0.102455	6.28089	0.898286	ENSG00000103978
ENSG00000103994	-0.226702	8.11672	0.773737	-0.347891	8.11672	0.653633	-0.272441	8.11672	0.728212	0.281783	8.11672	0.717082	ENSG00000103994
ENSG00000103995	-0.136604	6.38566	0.86501	-0.341297	6.38566	0.659718	-0.142287	6.38566	0.859273	-0.607376	6.38566	0.393236	ENSG00000103995
ENSG00000104047	-0.102315	3.14511	0.897851	-0.792204	3.14511	0.250939	0.0448268	3.14511	0.954079	-0.316408	3.14511	0.683312	ENSG00000104047
ENSG00000104064	0.216613	5.01184	0.782299	0.370102	5.01184	0.629487	0.207528	5.01184	0.791292	0.923255	5.01184	0.118935	ENSG00000104064
ENSG00000104067	-0.0639493	7.73228	0.937452	0.236022	7.73228	0.762663	-0.613931	7.73228	0.38656	-0.10632	7.73228	0.895085	ENSG00000104067
ENSG00000104081	2.05943	3.64858	2.97e-07	1.89061	3.64858	4.73e-06	0.50103	3.64858	0.498507	-0.6772	3.64858	0.345859	ENSG00000104081
ENSG00000104093	0.0946505	4.56955	0.904709	0.325238	4.56955	0.673923	0.739053	4.56955	0.267996	1.27213	4.56955	0.00781015	ENSG00000104093
ENSG00000104129	-0.065117	3.37061	0.935397	-0.531699	3.37061	0.470674	-0.190641	3.37061	0.809696	-0.731612	3.37061	0.291676	ENSG00000104129
ENSG00000104131	0.052927	8.2863	0.946255	0.0570792	8.2863	0.942109	0.0127482	8.2863	0.986327	-0.404049	8.2863	0.597719	ENSG00000104131
ENSG00000104133	0.295961	4.92453	0.703022	0.308552	4.92453	0.690524	-0.320639	4.92453	0.679675	1.33903	4.92453	0.00254763	ENSG00000104133
ENSG00000104142	-0.105811	4.84776	0.895897	-0.415521	4.84776	0.587844	-0.470824	4.84776	0.533591	-2.77202	4.84776	2.35e-06	ENSG00000104142
ENSG00000104154	-0.278412	3.001	0.720233	0.693022	3.001	0.32335	-0.274355	3.001	0.724726	1.51079	3.001	0.00276428	ENSG00000104154
ENSG00000104164	-0.52328	6.03511	0.477168	-0.592327	6.03511	0.408174	-0.0891708	6.03511	0.912464	-0.422954	6.03511	0.580636	ENSG00000104164
ENSG00000104177	0.0960891	5.66428	0.904606	-0.101514	5.66428	0.899862	0.0433254	5.66428	0.956928	0.864986	5.66428	0.156116	ENSG00000104177
ENSG00000104205	-0.295939	4.1786	0.70457	-0.441987	4.1786	0.558836	0.0116115	4.1786	0.987295	-0.890039	4.1786	0.164815	ENSG00000104205
ENSG00000104213	1.20385	5.03846	0.0152757	1.97863	5.03846	1.72e-07	0.436378	5.03846	0.562445	0.84729	5.03846	0.181009	ENSG00000104213
ENSG00000104218	0.164516	5.87325	0.834671	-0.137096	5.87325	0.863414	0.0643096	5.87325	0.935626	0.866049	5.87325	0.154581	ENSG00000104218
ENSG00000104219	0.305414	4.79263	0.693544	0.200722	4.79263	0.798226	0.194223	4.79263	0.804586	-0.135337	4.79263	0.864863	ENSG00000104219
ENSG00000104228	-0.458243	3.18949	0.542559	-0.784308	3.18949	0.248785	-0.283929	3.18949	0.716166	-1.14563	3.18949	0.0632508	ENSG00000104228
ENSG00000104231	-0.181822	3.07477	0.819058	-0.495682	3.07477	0.515047	0.330939	3.07477	0.668744	-0.402707	3.07477	0.603643	ENSG00000104231
ENSG00000104267	1.97262	5.56958	4.41e-07	1.62746	5.56958	0.000106981	1.33643	5.56958	0.00430416	-0.180724	5.56958	0.819342	ENSG00000104267
ENSG00000104299	-0.231171	2.5723	0.768117	-0.18075	2.5723	0.8184	0.377537	2.5723	0.621233	-0.725306	2.5723	0.316187	ENSG00000104299
ENSG00000104312	2.27017	5.92881	8.49e-12	3.40185	5.92881	5.68e-20	0.716105	5.92881	0.28843	3.85716	5.92881	2.33e-22	ENSG00000104312
ENSG00000104320	1.11548	6.55613	0.0268297	2.31792	6.55613	4.82e-11	0.241741	6.55613	0.756993	2.2925	6.55613	9.12e-11	ENSG00000104320
ENSG00000104325	0.295634	5.80009	0.703405	1.00289	5.80009	0.0663683	0.333466	5.80009	0.665965	0.407886	5.80009	0.592945	ENSG00000104325
ENSG00000104331	0.181479	5.81161	0.818612	0.11619	5.81161	0.885801	0.0489791	5.81161	0.951547	-0.0561757	5.81161	0.945148	ENSG00000104331
ENSG00000104341	-0.250898	3.57509	0.749029	-0.478912	3.57509	0.521758	0.192436	3.57509	0.806292	-0.685119	3.57509	0.329746	ENSG00000104341
ENSG00000104343	0.343161	3.9819	0.655906	0.0320078	3.9819	0.967562	0.40672	3.9819	0.592436	-0.155724	3.9819	0.843989	ENSG00000104343
ENSG00000104356	0.295055	4.81937	0.70373	0.229619	4.81937	0.769157	0.0822546	4.81937	0.916571	-1.50227	4.81937	0.0026423	ENSG00000104356
ENSG00000104365	0.0703814	5.36172	0.929487	-0.00645169	5.36172	0.99429	0.0983717	5.36172	0.901485	-0.479966	5.36172	0.520363	ENSG00000104365
ENSG00000104368	1.63899	5.89967	3.91e-06	0.892502	5.89967	0.134869	0.414613	5.89967	0.585278	-0.771506	5.89967	0.239978	ENSG00000104368
ENSG00000104375	-0.207376	4.89368	0.792924	0.115621	4.89368	0.883681	-0.492208	4.89368	0.508059	0.808183	4.89368	0.206736	ENSG00000104375
ENSG00000104388	-0.0748236	7.57648	0.926697	-0.058881	7.57648	0.942496	-0.0232427	7.57648	0.977707	0.345592	7.57648	0.654459	ENSG00000104388
ENSG00000104408	0.0375565	6.76387	0.961608	-0.0900232	6.76387	0.910843	0.704301	6.76387	0.297517	0.634064	6.76387	0.36546	ENSG00000104408
ENSG00000104412	0.154452	6.13587	0.845609	0.349935	6.13587	0.650485	-0.177583	6.13587	0.822853	-0.158793	6.13587	0.841676	ENSG00000104412
ENSG00000104419	0.543929	8.402	0.455361	-0.14296	8.402	0.85825	-0.151998	8.402	0.849208	-0.322872	8.402	0.678596	ENSG00000104419
ENSG00000104427	-0.896673	3.81959	0.166407	-1.13131	3.81959	0.0586559	-0.723041	3.81959	0.29526	-0.382089	3.81959	0.618954	ENSG00000104427
ENSG00000104432	2.10781	1.98168	0.0114621	4.59666	1.98168	4.98e-10	0.605686	1.98168	0.526511	6.07133	1.98168	5.9e-15	ENSG00000104432
ENSG00000104442	-0.510747	6.88325	0.489844	-0.809181	6.88325	0.200991	-0.367089	6.88325	0.636038	-1.03571	6.88325	0.0496494	ENSG00000104442
ENSG00000104450	0.199402	4.86217	0.799581	0.574622	4.86217	0.424938	0.420018	4.86217	0.579778	0.744491	4.86217	0.263734	ENSG00000104450
ENSG00000104472	-0.124574	5.57099	0.876133	0.00352342	5.57099	0.995577	0.19863	5.57099	0.800075	0.694524	5.57099	0.309588	ENSG00000104472
ENSG00000104490	-0.831429	1.78838	0.245193	-2.71019	1.78838	0.000157485	-0.0477943	1.78838	0.952501	-1.85796	1.78838	0.00838364	ENSG00000104490
ENSG00000104497	0.577325	2.84818	0.436446	0.522741	2.84818	0.487863	0.465819	2.84818	0.538539	1.57822	2.84818	0.00479494	ENSG00000104497
ENSG00000104517	0.0431156	6.58887	0.957133	0.00573273	6.58887	0.99391	-0.131186	6.58887	0.870374	-0.288895	6.58887	0.711747	ENSG00000104517
ENSG00000104518	0.134376	4.40221	0.864588	0.651688	4.40221	0.350369	0.00302908	4.40221	0.996121	-1.16535	4.40221	0.0369896	ENSG00000104518
ENSG00000104522	-0.639106	6.08952	0.375193	-1.24679	6.08952	0.0315005	-0.529574	6.08952	0.477412	-0.381206	6.08952	0.62235	ENSG00000104522
ENSG00000104524	-0.0765372	2.39248	0.924119	-0.569499	2.39248	0.452796	0.119824	2.39248	0.878788	-1.13872	2.39248	0.112751	ENSG00000104524
[truncated: 9,358 more rows]

## Sheet: Ensembl ID to gene name
ENSEMBLGENE	logFC	logCPM	Pvalue	logFC.1	logCPM.1	Pvalue.1	logFC.2	logCPM.2	Pvalue.2	logFC.3	logCPM.3	Pvalue.3	external_gene_name
ENSG00000000003	-0.743751	4.55785	0.267133	-0.906162	4.55785	0.141092	0.417361	4.55785	0.581714	-0.359959	4.55785	0.640167	TSPAN6
ENSG00000000419	0.108453	4.75884	0.890174	0.0964688	4.75884	0.902259	-0.128665	4.75884	0.872534	-0.781387	4.75884	0.254466	DPM1
ENSG00000000460	-0.456511	1.78284	0.559013	-0.13903	1.78284	0.8607	-1.43246	1.78284	0.0431228	0.792963	1.78284	0.277646	C1orf112
ENSG00000000971	-0.450115	6.9334	0.553369	-0.324618	6.9334	0.676356	0.131856	6.9334	0.868554	-0.620589	6.9334	0.380078	CFH
ENSG00000001036	-0.0661253	5.46241	0.934619	-0.358448	5.46241	0.642259	-0.290225	5.46241	0.710371	0.171774	5.46241	0.827248	FUCA2
ENSG00000001084	-0.186681	4.10063	0.813381	-0.623286	4.10063	0.381325	0.0577743	4.10063	0.941401	-0.0137889	4.10063	0.986338	GCLC
ENSG00000001167	0.414895	3.65317	0.584106	0.34253	3.65317	0.656407	-0.384145	3.65317	0.615672	0.178518	3.65317	0.820939	NFYA
ENSG00000001461	-0.731067	5.25994	0.275607	-1.37751	5.25994	0.00237672	-0.394921	5.25994	0.606211	-1.1324	5.25994	0.0298004	NIPAL3
ENSG00000001497	0.0188683	4.67499	0.980772	0.0137742	4.67499	0.985861	-0.412209	4.67499	0.589126	-0.546739	4.67499	0.454072	LAS1L
ENSG00000001617	0.268128	6.48741	0.730415	0.326499	6.48741	0.672198	-0.514102	6.48741	0.487831	-0.450475	6.48741	0.551134	SEMA3F
ENSG00000001629	0.47273	7.12431	0.527393	1.20594	7.12431	0.00723276	0.115344	7.12431	0.884253	0.33004	7.12431	0.669373	ANKIB1
ENSG00000001631	0.137278	4.98918	0.861844	0.0313984	4.98918	0.968017	0.183696	4.98918	0.815144	0.919777	4.98918	0.120985	KRIT1
ENSG00000002016	0.24312	2.61476	0.756031	0.319394	2.61476	0.680525	0.0753871	2.61476	0.923874	1.39141	2.61476	0.011583	RAD52
ENSG00000002079	1.23542	1.0549	0.284574	1.3909	1.0549	0.231737	0.225446	1.0549	0.857858	6.66316	1.0549	4.53e-13	MYH16
ENSG00000002330	-1.01726	3.74084	0.0872981	-1.57494	3.74084	0.00153653	-0.268101	3.74084	0.732414	-0.633672	3.74084	0.372784	BAD
ENSG00000002549	1.77306	9.73006	7.36e-07	2.32665	9.73006	1.99e-11	0.484905	9.73006	0.514339	1.0559	9.73006	0.042822	LAP3
ENSG00000002586	0.0605873	6.96131	0.93857	0.412813	6.96131	0.58691	-0.280701	6.96131	0.719919	0.361927	6.96131	0.637558	CD99
ENSG00000002822	-0.239738	4.26496	0.760658	-0.654732	4.26496	0.349988	-0.679737	4.26496	0.325607	-1.32524	4.26496	0.0106574	MAD1L1
ENSG00000002834	0.505483	4.45423	0.493526	0.481387	4.45423	0.517697	-0.315923	4.45423	0.684371	-0.340497	4.45423	0.659379	LASP1
ENSG00000002919	-0.0993832	4.37793	0.901111	-0.0668963	4.37793	0.933617	-0.461733	4.37793	0.538541	-0.412762	4.37793	0.587147	SNX11
ENSG00000003056	0.432039	4.84921	0.567076	0.405412	4.84921	0.593722	-0.614352	4.84921	0.38787	0.407662	4.84921	0.591602	M6PR
ENSG00000003147	-0.153846	3.23691	0.846033	-0.161232	3.23691	0.838437	0.501271	3.23691	0.50056	0.660453	3.23691	0.355903	ICA1
ENSG00000003249	-0.707587	3.89936	0.306213	-0.535285	3.89936	0.467433	0.0836505	3.89936	0.915065	-1.16417	3.89936	0.0469969	DBNDD1
ENSG00000003393	0.129639	4.64453	0.869542	0.172147	4.64453	0.826884	-0.0233766	4.64453	0.977359	0.289408	4.64453	0.709719	ALS2
ENSG00000003400	0.829333	4.91978	0.189246	1.2701	4.91978	0.00632599	0.362984	4.91978	0.636414	0.219845	4.91978	0.779404	CASP10
ENSG00000003402	1.11871	9.10057	0.0233558	2.14134	9.10057	4.95e-10	0.059727	9.10057	0.939299	2.41937	9.10057	3.08e-12	CFLAR
ENSG00000003436	1.04716	8.50403	0.0421701	1.04405	8.50403	0.0434284	1.43912	8.50403	0.000112703	-0.142292	8.50403	0.859523	TFPI
ENSG00000003509	-0.20342	3.65607	0.796528	-0.815687	3.65607	0.219995	-0.0345636	3.65607	0.966138	0.455266	3.65607	0.544256	NDUFAF7
ENSG00000003756	-0.0828501	6.66323	0.918575	0.046417	6.66323	0.95362	-0.782627	6.66323	0.22497	-0.571322	6.66323	0.428999	RBM5
ENSG00000003987	0.289969	2.04997	0.713883	0.832439	2.04997	0.242458	-0.00646422	2.04997	0.993331	1.60691	2.04997	0.0067567	MTMR7
ENSG00000003989	1.62207	9.14237	0.000115971	2.33302	9.14237	1.74e-09	0.458282	9.14237	0.540723	0.378731	9.14237	0.620015	SLC7A2
ENSG00000004142	-0.00409954	5.19697	0.996674	-0.0248146	5.19697	0.975908	0.046809	5.19697	0.953525	0.332812	5.19697	0.66652	POLDIP2
ENSG00000004399	-0.341745	5.1065	0.658994	-0.73812	5.1065	0.269173	-0.0682645	5.1065	0.932529	-0.17117	5.1065	0.829241	PLXND1
ENSG00000004455	0.00199222	7.12469	0.997021	0.0510113	7.12469	0.948072	0.0429571	7.12469	0.95611	-0.689213	7.12469	0.314156	AK2
ENSG00000004468	4.07254	1.69862	0.00119209	8.62901	1.69862	4.88e-14	3.18281	1.69862	0.00996117	7.53598	1.69862	7.54e-11	CD38
ENSG00000004478	0.191604	3.44112	0.807291	0.405036	3.44112	0.593898	0.0318387	3.44112	0.967419	-0.175182	3.44112	0.824161	FKBP4
ENSG00000004487	0.168718	5.20588	0.830251	-0.108244	5.20588	0.892256	-0.0399292	5.20588	0.960824	-0.130041	5.20588	0.870318	KDM1A
ENSG00000004534	0.107704	5.91295	0.892461	0.136949	5.91295	0.862892	0.0295035	5.91295	0.970332	0.369949	5.91295	0.631007	RBM6
ENSG00000004700	0.276032	5.20124	0.722798	0.207049	5.20124	0.791788	0.0861595	5.20124	0.912752	0.518541	5.20124	0.48099	RECQL
ENSG00000004766	0.0771421	4.63915	0.921802	0.0681056	4.63915	0.930928	-0.0163515	4.63915	0.984634	-0.134494	4.63915	0.86576	VPS50
ENSG00000004779	-0.265414	7.13549	0.735132	-0.361178	7.13549	0.641009	0.0302682	7.13549	0.969598	-0.431664	7.13549	0.571807	NDUFAB1
ENSG00000004799	-1.57968	4.18073	0.00149903	-2.88219	4.18073	2.04e-08	-1.03759	4.18073	0.0782937	-1.67564	4.18073	0.00100572	PDK4
ENSG00000004864	-0.152788	5.21917	0.84768	0.021317	5.21917	0.978375	0.157445	5.21917	0.841865	-0.257623	5.21917	0.742716	SLC25A13
ENSG00000004866	-0.525433	4.44222	0.475139	-0.368803	4.44222	0.631288	-0.15154	4.44222	0.848961	0.481392	4.44222	0.517859	ST7
ENSG00000004897	0.02675	7.40084	0.973299	0.13996	7.40084	0.861123	-0.030716	7.40084	0.970278	-0.0904221	7.40084	0.911614	CDC27
ENSG00000004961	-0.0105162	6.07127	0.990451	0.522551	6.07127	0.476592	-0.0122511	6.07127	0.98875	1.45958	6.07127	0.000433156	HCCS
ENSG00000004975	-0.262941	5.96625	0.737606	-0.577565	5.96625	0.422867	-0.0303861	5.96625	0.970505	-0.553022	5.96625	0.447382	DVL2
ENSG00000005007	0.079107	7.39111	0.920242	-0.103698	7.39111	0.897257	-0.147355	7.39111	0.853314	-0.660495	7.39111	0.340925	UPF1
ENSG00000005020	-0.448349	5.38095	0.554214	-1.08916	5.38095	0.0403074	0.186911	5.38095	0.811908	-0.000255166	5.38095	1.00043	SKAP2
ENSG00000005022	0.00695796	8.08748	0.991689	-0.0930846	8.08748	0.908179	0.33578	8.08748	0.663013	0.199166	8.08748	0.799345	SLC25A5
ENSG00000005059	0.0556204	5.97362	0.944559	0.489092	5.97362	0.51099	-0.184989	5.97362	0.815434	-0.239678	5.97362	0.760698	MCUB
ENSG00000005075	-0.718313	5.46821	0.286312	-0.81029	5.46821	0.203921	-0.277336	5.46821	0.723296	0.0154115	5.46821	0.983899	POLR2J
ENSG00000005100	-0.225565	5.39539	0.774909	-0.302584	5.39539	0.698057	-0.387454	5.39539	0.615382	-0.639599	5.39539	0.362215	DHX33
ENSG00000005156	0.0668015	4.41531	0.93224	0.366283	4.41531	0.63268	-0.451911	4.41531	0.548646	-0.209168	4.41531	0.790934	LIG3
ENSG00000005175	-0.0399774	6.72275	0.961157	0.0148521	6.72275	0.984922	-0.22371	6.72275	0.776668	0.15014	6.72275	0.849951	RPAP3
ENSG00000005189	0.467333	2.37592	0.54373	0.734307	2.37592	0.31478	0.0794108	2.37592	0.921044	3.26712	2.37592	3.88e-10	REXO5
ENSG00000005194	-0.0536055	4.54858	0.947022	0.0142617	4.54858	0.985176	-0.100959	4.54858	0.899651	0.536645	4.54858	0.462766	CIAPIN1
ENSG00000005206	-0.317633	4.38514	0.683391	-0.605611	4.38514	0.400445	-0.479892	4.38514	0.522051	-1.76367	4.38514	0.000568673	SPPL2B
ENSG00000005238	0.598876	3.62931	0.40728	1.16706	3.62931	0.0403394	0.61115	3.62931	0.394517	1.75253	3.62931	0.000208457	FAM214B
ENSG00000005243	-0.545554	1.85131	0.473911	-0.497995	1.85131	0.517457	-0.0661404	1.85131	0.933702	1.05291	1.85131	0.110882	COPZ2
ENSG00000005249	-0.182449	4.87755	0.81791	-0.289834	4.87755	0.710446	0.584237	4.87755	0.414995	-0.00247474	4.87755	0.998069	PRKAR2B
ENSG00000005302	0.32733	6.15912	0.671879	0.658952	6.15912	0.340997	0.247185	6.15912	0.751621	0.391164	6.15912	0.615101	MSL3
ENSG00000005339	0.182518	7.16766	0.816313	0.187692	7.16766	0.811096	-0.519896	7.16766	0.480578	0.426494	7.16766	0.575084	CREBBP
ENSG00000005436	-0.265409	4.19746	0.734786	-0.455298	4.19746	0.544843	0.257001	4.19746	0.741677	0.118734	4.19746	0.880668	GCFC2
ENSG00000005448	-0.621124	5.15042	0.382058	-1.2458	5.15042	0.0144407	-0.12457	5.15042	0.876365	-1.02306	5.15042	0.0765297	WDR54
ENSG00000005469	-0.927821	4.03011	0.130536	-1.50084	4.03011	0.0018997	-0.293211	4.03011	0.707321	-1.29808	4.03011	0.0145755	CROT
ENSG00000005483	0.471064	7.79744	0.533143	0.46796	7.79744	0.536617	0.0708736	7.79744	0.930115	1.23491	7.79744	0.00461815	KMT2E
ENSG00000005486	-0.500696	3.78618	0.501139	-0.327278	3.78618	0.673029	-0.177789	3.78618	0.822812	-0.257165	3.78618	0.742874	RHBDD2
ENSG00000005700	0.220721	6.33969	0.778064	0.545767	6.33969	0.453021	-0.195335	6.33969	0.805063	-0.32128	6.33969	0.67946	IBTK
ENSG00000005801	0.118361	3.25939	0.8807	-0.145548	3.25939	0.85434	-0.0365268	3.25939	0.964287	-0.469145	3.25939	0.532291	ZNF195
ENSG00000005810	0.653705	6.57039	0.346023	0.973769	6.57039	0.0784651	-0.18694	6.57039	0.813434	-0.0385288	6.57039	0.962191	MYCBP2
ENSG00000005812	-0.142914	4.85129	0.857505	-0.0923544	4.85129	0.90814	0.00503954	4.85129	0.994135	0.986675	4.85129	0.0824733	FBXL3
ENSG00000005882	-0.765823	2.40856	0.27989	-0.655982	2.40856	0.368697	-0.141737	2.40856	0.858455	-0.243249	2.40856	0.755877	PDK2
ENSG00000005884	0.336283	6.29309	0.663012	0.395274	6.29309	0.60439	-0.631882	6.29309	0.369271	-0.589013	6.29309	0.411684	ITGA3
ENSG00000005889	-0.0134575	6.04002	0.987347	1.82e-05	6.04002	0.999586	-0.304957	6.04002	0.695776	1.1218	6.04002	0.0222131	ZFX
ENSG00000005893	-0.103526	8.00201	0.899038	0.101392	8.00201	0.900227	0.123751	8.00201	0.878091	-0.398002	8.00201	0.60894	LAMP2
ENSG00000006007	-0.59099	6.5049	0.411817	-1.0407	6.5049	0.0644087	-0.40209	6.5049	0.599486	-0.581734	6.5049	0.42102	GDE1
ENSG00000006015	-0.688252	4.27964	0.318046	-1.19311	4.27964	0.0244433	-0.455035	4.27964	0.545651	-0.666418	4.27964	0.339559	REX1BD
ENSG00000006016	-0.987455	7.91156	0.104232	-0.799766	7.91156	0.229634	-0.722269	7.91156	0.294458	0.0867624	7.91156	0.911128	CRLF1
ENSG00000006025	-0.273754	2.10878	0.726795	-0.95759	2.10878	0.167203	-0.741271	2.10878	0.298105	-0.606071	2.10878	0.418998	OSBPL7
ENSG00000006042	-0.767102	2.40169	0.278307	-1.26255	2.40169	0.0500426	-0.428558	2.40169	0.574367	-0.758598	2.40169	0.293051	TMEM98
ENSG00000006062	0.453716	2.11466	0.555643	0.938488	2.11466	0.173337	-0.24528	2.11466	0.756377	-0.165287	2.11466	0.834707	MAP3K14
ENSG00000006118	1.15348	3.86916	0.0725735	1.79178	3.86916	0.00112725	0.891376	3.86916	0.19386	4.6084	3.86916	1.14e-16	TMEM132A
ENSG00000006125	0.00785256	8.06253	0.991703	0.103891	8.06253	0.896635	0.0641426	8.06253	0.936202	-0.100201	8.06253	0.901427	AP2B1
ENSG00000006194	-0.577728	5.0157	0.427906	-0.567477	5.0157	0.437925	-0.294904	5.0157	0.706399	1.34706	5.0157	0.00741883	ZNF263
ENSG00000006210	6.59133	3.79304	2.5e-15	8.91987	3.79304	4.47e-22	3.37955	3.79304	8.24e-05	4.81308	3.79304	1.77e-08	CX3CL1
ENSG00000006282	-0.0238142	3.00953	0.976825	-0.758271	3.00953	0.275466	0.29742	3.00953	0.700996	-0.539635	3.00953	0.467641	SPATA20
ENSG00000006327	-0.204438	5.91559	0.797834	-0.146801	5.91559	0.855356	-1.1238	5.91559	0.0626191	0.0465125	5.91559	0.951471	TNFRSF12A
ENSG00000006451	1.37505	7.80729	0.000417226	1.67314	7.80729	1.93e-07	0.209672	7.80729	0.789023	-0.294007	7.80729	0.706748	RALA
ENSG00000006453	-0.737229	3.22911	0.291845	-0.272605	3.22911	0.727778	0.228605	3.22911	0.769803	0.0118741	3.22911	0.987746	BAIAP2L1
ENSG00000006530	-0.169237	2.83715	0.830541	0.0254682	2.83715	0.974209	0.0337351	2.83715	0.965299	-1.03157	2.83715	0.123025	AGK
ENSG00000006534	-1.16995	4.45166	0.0268024	-1.46162	4.45166	0.00204061	-0.563077	4.45166	0.438482	-0.898566	4.45166	0.147804	ALDH3B1
ENSG00000006576	-0.617374	6.32507	0.383258	-0.883624	6.32507	0.140969	-0.41337	6.32507	0.5916	-0.855832	6.32507	0.163502	PHTF2
ENSG00000006607	-0.305032	4.14462	0.695237	-0.640179	4.14462	0.364261	-0.220186	4.14462	0.780313	-0.780365	4.14462	0.241538	FARP2
ENSG00000006625	-0.415055	6.28154	0.586693	-0.81464	6.28154	0.197504	-0.111212	6.28154	0.88966	-0.163461	6.28154	0.837013	GGCT
ENSG00000006634	-0.00968677	6.34791	0.99115	-0.12038	6.34791	0.880607	-0.160763	6.34791	0.839733	0.506608	6.34791	0.492483	DBF4
ENSG00000006638	0.920365	2.36861	0.171983	0.704876	2.36861	0.328657	0.823481	2.36861	0.231259	-0.122281	2.36861	0.874752	TBXA2R
ENSG00000006652	0.170164	4.9359	0.828846	0.673951	4.9359	0.328077	0.21062	4.9359	0.788197	1.05489	4.9359	0.0513891	IFRD1
ENSG00000006695	0.426444	3.55505	0.572426	0.541709	3.55505	0.459001	-0.112954	3.55505	0.887439	-1.10101	3.55505	0.0776448	COX10
ENSG00000006704	-0.326864	3.90725	0.673035	-0.282388	3.90725	0.717434	0.48658	3.90725	0.512402	-0.795011	3.90725	0.236106	GTF2IRD1
ENSG00000006712	-0.153837	5.61203	0.846634	0.0247872	5.61203	0.974583	-0.427559	5.61203	0.573593	0.237029	5.61203	0.76194	PAF1
ENSG00000006715	-0.0957266	5.62056	0.905003	-0.14438	5.62056	0.856108	-0.355759	5.62056	0.645319	-0.510874	5.62056	0.489494	VPS41
ENSG00000006744	-0.11608	5.76256	0.88458	-0.324844	5.76256	0.675903	-0.239174	5.76256	0.761308	-0.870442	5.76256	0.15614	ELAC2
ENSG00000006756	-0.0970709	3.34405	0.903034	-0.0653198	3.34405	0.934761	0.247398	3.34405	0.751187	0.179033	3.34405	0.820332	ARSD
ENSG00000006757	0.349868	2.78872	0.649186	0.279515	2.78872	0.719589	0.18022	2.78872	0.818294	0.414962	2.78872	0.586275	PNPLA4
ENSG00000006831	-0.29356	8.07718	0.707272	-0.452837	8.07718	0.549023	0.165346	8.07718	0.833638	-0.0504783	8.07718	0.950621	ADIPOR2
ENSG00000007047	-0.37625	4.40881	0.624851	-0.276247	4.40881	0.724509	0.367831	4.40881	0.630916	-1.43959	4.40881	0.0093709	MARK4
ENSG00000007080	-0.355404	4.40991	0.645286	-0.620801	4.40991	0.38295	-0.948708	4.40991	0.113464	-0.581025	4.40991	0.421736	CCDC124
ENSG00000007168	0.073892	7.00444	0.927266	0.124794	7.00444	0.877657	-0.0233229	7.00444	0.977583	0.00448322	7.00444	0.995283	PAFAH1B1
ENSG00000007202	-0.538702	6.12596	0.461689	-0.644359	6.12596	0.356844	-0.21677	6.12596	0.783665	-0.762696	6.12596	0.244483	KIAA0100
ENSG00000007255	-0.983193	5.25605	0.110998	-0.820094	5.25605	0.21695	-0.27589	5.25605	0.725734	0.286693	5.25605	0.711901	TRAPPC6A
ENSG00000007341	0.174342	3.58899	0.824717	0.263701	3.58899	0.735294	0.0442444	3.58899	0.955008	2.2968	3.58899	1.27e-08	ST7L
ENSG00000007376	-0.566359	3.75668	0.439899	-1.07995	3.75668	0.0787439	-0.310177	3.75668	0.69094	-1.39183	3.75668	0.0168066	RPUSD1
ENSG00000007384	0.483596	5.36641	0.515607	0.529932	5.36641	0.469039	0.10677	5.36641	0.892334	-1.4228	5.36641	0.00203185	RHBDF1
ENSG00000007392	-0.0653161	5.57287	0.935687	0.356461	5.57287	0.643787	-0.051572	5.57287	0.949436	-0.460487	5.57287	0.540584	LUC7L
ENSG00000007541	-0.623951	2.68953	0.394287	-0.425121	2.68953	0.578306	0.313947	2.68953	0.684872	-0.558608	2.68953	0.456266	PIGQ
ENSG00000007545	-0.00139731	4.51019	0.999322	0.364685	4.51019	0.634888	0.035341	4.51019	0.964124	0.308952	4.51019	0.690244	CRAMP1
ENSG00000007908	7.94617	4.20865	1.46e-17	8.89261	4.20865	2.19e-20	4.17517	4.20865	1.63e-05	9.58645	4.20865	3.7e-22	SELE
ENSG00000007923	0.406846	2.93957	0.593939	0.615114	2.93957	0.396201	-0.722804	2.93957	0.308853	1.06481	2.93957	0.0857757	DNAJC11
ENSG00000007944	-1.58417	4.37319	0.00172601	-1.11901	4.37319	0.0538501	0.819684	4.37319	0.20269	1.58612	4.37319	0.000283924	MYLIP
ENSG00000007952	0.0265135	2.95835	0.972551	-0.863271	2.95835	0.239198	0.040309	2.95835	0.958328	0.51425	2.95835	0.500192	NOX1
ENSG00000007968	-1.73887	4.10028	0.000142351	-1.69047	4.10028	0.00028382	0.150166	4.10028	0.848565	-0.170713	4.10028	0.829625	E2F2
ENSG00000008018	-0.046929	8.64686	0.956089	0.19037	8.64686	0.807023	-0.56766	8.64686	0.443142	-0.806308	8.64686	0.238339	PSMB1
ENSG00000008083	-0.467556	4.74412	0.533905	-0.727996	4.74412	0.285831	-0.51542	4.74412	0.48647	-1.67559	4.74412	0.000655131	JARID2
ENSG00000008086	0.147805	1.63939	0.857702	1.22637	1.63939	0.0697825	-0.927867	1.63939	0.230965	-0.236275	1.63939	0.77127	CDKL5
ENSG00000008130	0.164562	4.12591	0.834494	0.595703	4.12591	0.405256	0.0355691	4.12591	0.963973	0.692952	4.12591	0.313956	NADK
ENSG00000008256	-0.786898	8.18689	0.2302	-1.2299	8.18689	0.014642	-0.801101	8.18689	0.218069	-1.52879	8.18689	0.000634353	CYTH3
ENSG00000008282	0.254541	5.93622	0.744343	0.17643	5.93622	0.822486	0.344639	5.93622	0.654701	0.249865	5.93622	0.749132	SYPL1
ENSG00000008283	-0.573363	2.6983	0.442839	-0.40347	2.6983	0.601009	-0.667034	2.6983	0.359492	0.102579	2.6983	0.897815	CYB561
ENSG00000008294	0.705342	8.46506	0.295869	1.08134	8.46506	0.0303681	-0.213662	8.46506	0.786794	0.558389	8.46506	0.440274	SPAG9
ENSG00000008300	-0.674214	2.08661	0.373983	-0.578838	2.08661	0.452333	0.538323	2.08661	0.47168	2.71863	2.08661	3.33e-08	CELSR3
ENSG00000008311	-0.0430507	3.57583	0.957292	0.145722	3.57583	0.853464	0.405283	3.57583	0.593742	0.0907104	3.57583	0.909154	AASS
ENSG00000008324	-0.561031	4.60729	0.442845	-0.588552	4.60729	0.416661	-0.467122	4.60729	0.534634	0.518265	4.60729	0.482309	SS18L2
ENSG00000008382	-0.540333	3.3693	0.462041	-0.981751	3.3693	0.116683	-0.133355	3.3693	0.867173	-0.149174	3.3693	0.850736	MPND
ENSG00000008394	0.205013	3.97856	0.793843	0.113109	3.97856	0.886073	0.927908	3.97856	0.133974	0.113795	3.97856	0.885879	MGST1
ENSG00000008405	-0.459687	4.80854	0.540626	-0.536753	4.80854	0.463758	0.218638	4.80854	0.780146	0.459941	4.80854	0.539553	CRY1
ENSG00000008441	-0.108001	6.29222	0.892812	0.270926	6.29222	0.727961	-0.0893641	6.29222	0.911563	-0.873221	6.29222	0.15066	NFIX
ENSG00000008513	-0.111338	6.43355	0.889571	-0.43703	6.43355	0.564287	-0.646557	6.43355	0.355422	-2.44341	6.43355	7.49e-10	ST3GAL1
ENSG00000008517	2.48742	5.80499	1.45e-10	3.05359	5.80499	3.6e-14	0.788804	5.80499	0.228268	-0.32809	5.80499	0.671171	IL32
ENSG00000008710	-0.456279	2.02874	0.556504	-0.618502	2.02874	0.417772	-0.431892	2.02874	0.577342	-1.26461	2.02874	0.0875654	PKD1
ENSG00000008735	0.817328	1.60422	0.267025	-0.00364267	1.60422	0.992751	-1.09606	1.60422	0.155048	1.60118	1.60422	0.0121806	MAPK8IP2
ENSG00000008838	0.771226	8.45953	0.263303	1.07884	8.45953	0.0793838	0.188208	8.45953	0.809153	-1.10478	8.45953	0.0759119	MED24
ENSG00000008853	0.787368	3.95738	0.229512	-0.287452	3.95738	0.712269	0.284965	3.95738	0.713723	0.0149311	3.95738	0.984772	RHOBTB2
ENSG00000008869	-0.29792	3.7935	0.702048	-0.453176	3.7935	0.547013	-0.31654	3.7935	0.683588	0.257498	3.7935	0.741575	HEATR5B
ENSG00000008952	0.328078	8.59249	0.671155	0.374553	8.59249	0.627459	0.275926	8.59249	0.722875	-0.365667	8.59249	0.637057	SEC62
ENSG00000008988	-0.216855	10.3975	0.783785	-0.164799	10.3975	0.835952	-0.0296209	10.3975	0.971512	0.647941	10.3975	0.351774	RPS20
ENSG00000009307	0.273509	10.06	0.725278	0.458132	10.06	0.54212	0.106979	10.06	0.89244	0.45265	10.06	0.547686	CSDE1
ENSG00000009335	-0.194355	6.22923	0.806069	-0.00524907	6.22923	0.995595	-0.22992	6.22923	0.770512	-0.835035	6.22923	0.181287	UBE3C
ENSG00000009413	0.337902	6.73294	0.661121	-0.0492388	6.73294	0.951774	0.445121	6.73294	0.55412	0.715965	6.73294	0.288368	REV3L
ENSG00000009780	-0.0729695	4.75209	0.927589	-0.139222	4.75209	0.861146	-0.215253	4.75209	0.78517	0.62665	4.75209	0.3741	FAM76A
ENSG00000009830	0.199007	5.57704	0.799453	0.155014	5.57704	0.843487	-0.077997	5.57704	0.923341	-1.03535	5.57704	0.0813471	POMT2
ENSG00000009844	-0.211705	5.94409	0.788727	-0.0627367	5.94409	0.938438	-0.328687	5.94409	0.672221	-0.168266	5.94409	0.832168	VTA1
ENSG00000009954	0.0132116	8.86927	0.986477	-0.163178	8.86927	0.837603	-0.0845142	8.86927	0.917328	0.446933	8.86927	0.556713	BAZ1B
ENSG00000010017	0.189185	4.35882	0.809541	0.120167	4.35882	0.878754	0.302545	4.35882	0.696036	0.586342	4.35882	0.418717	RANBP9
ENSG00000010030	1.8938	4.9531	0.000147627	2.7766	4.9531	4.98e-09	-0.0317301	4.9531	0.968398	0.620261	4.9531	0.401732	ETV7
ENSG00000010072	-0.188978	4.26882	0.811267	-0.155601	4.26882	0.844636	0.210704	4.26882	0.78803	0.747735	4.26882	0.262797	SPRTN
ENSG00000010165	0.00429641	4.94511	0.994969	0.0875373	4.94511	0.911627	0.0458213	4.94511	0.953318	0.0288377	4.94511	0.970537	EEF1AKNMT
ENSG00000010219	0.0115874	3.20231	0.988103	0.00273945	3.20231	0.997149	-0.125666	3.20231	0.874472	0.712372	3.20231	0.304017	DYRK4
ENSG00000010244	0.161254	7.08423	0.839359	0.361922	7.08423	0.640007	0.0585736	7.08423	0.942106	0.221874	7.08423	0.776898	ZNF207
ENSG00000010256	-0.490855	5.12241	0.509584	-0.66453	5.12241	0.338309	0.0183494	5.12241	0.981183	-0.517324	5.12241	0.483072	UQCRC1
ENSG00000010270	0.313935	4.33241	0.685493	0.440413	4.33241	0.561511	0.269546	4.33241	0.729142	0.47576	4.33241	0.528433	STARD3NL
ENSG00000010278	0.230696	9.28008	0.775487	0.50477	9.28008	0.531609	0.889939	9.28008	0.251963	-1.14779	9.28008	0.139317	CD9
ENSG00000010292	-0.0994082	7.01744	0.901598	-0.654274	7.01744	0.348662	0.0858887	7.01744	0.912974	0.0668905	7.01744	0.932031	NCAPD2
ENSG00000010295	-0.622812	5.77877	0.380207	-0.832953	5.77877	0.190816	-0.201253	5.77877	0.799708	-1.66174	5.77877	0.00016611	IFFO1
ENSG00000010318	-0.525888	3.52099	0.475948	-0.683726	3.52099	0.330179	-0.0240865	3.52099	0.976608	1.11327	3.52099	0.0470885	PHF7
ENSG00000010322	-0.372271	4.42157	0.628315	-0.989741	4.42157	0.0910905	-0.147265	4.42157	0.8534	-1.39238	4.42157	0.00466266	NISCH
ENSG00000010404	0.0477766	4.71629	0.951384	-0.236256	4.71629	0.763978	0.197158	4.71629	0.801629	0.454903	4.71629	0.544411	IDS
ENSG00000010539	0.0742867	3.8231	0.924967	-0.0148972	3.8231	0.985549	0.214879	3.8231	0.783832	0.522739	3.8231	0.477503	ZNF200
ENSG00000010626	-0.00854865	4.10357	0.992605	-0.335131	4.10357	0.666017	-0.194007	4.10357	0.807014	0.0231079	4.10357	0.976113	LRRC23
ENSG00000010704	-0.445652	2.51919	0.55797	0.246166	2.51919	0.753499	-0.0567234	2.51919	0.943678	-1.04563	2.51919	0.133793	HFE
ENSG00000010803	-0.620178	4.54411	0.383107	-1.0296	4.54411	0.0741832	-0.122625	4.54411	0.878183	-0.52129	4.54411	0.480029	SCMH1
ENSG00000010810	0.264389	5.88765	0.734519	0.44556	5.88765	0.555827	0.0603616	5.88765	0.939654	-0.0842386	5.88765	0.916646	FYN
ENSG00000010818	1.33248	6.17129	0.00196968	2.22472	6.17129	5.11e-12	0.631477	6.17129	0.368243	4.04261	6.17129	6.38e-24	HIVEP2
ENSG00000011007	0.383279	5.98024	0.618071	0.524212	5.98024	0.474725	-0.288857	5.98024	0.711773	0.394844	5.98024	0.606618	ELOA
ENSG00000011009	0.0831441	6.7575	0.915368	0.0584398	6.7575	0.940107	0.422896	6.7575	0.57603	-0.919793	6.7575	0.133099	LYPLA2
ENSG00000011021	0.697032	3.46315	0.313825	0.784317	3.46315	0.239779	0.504659	3.46315	0.495196	-0.277312	3.46315	0.721477	CLCN6
ENSG00000011028	-0.939897	5.15504	0.123844	-1.52466	5.15504	0.00170871	0.736314	5.15504	0.273088	0.379663	5.15504	0.619337	MRC2
ENSG00000011105	-0.455561	5.54184	0.545464	-0.0913743	5.54184	0.909498	0.0181547	5.54184	0.98076	-0.621899	5.54184	0.381048	TSPAN9
ENSG00000011114	-0.386362	6.73189	0.615327	-0.601932	6.73189	0.398468	-0.302923	6.73189	0.697926	-1.28877	6.73189	0.00321565	BTBD7
ENSG00000011132	0.107576	2.88555	0.891759	0.278969	2.88555	0.720144	0.260557	2.88555	0.737826	-1.26235	2.88555	0.0537105	APBA3
ENSG00000011143	-0.182282	2.34637	0.81748	-1.13866	2.34637	0.084253	-0.675038	2.34637	0.347533	-0.563357	2.34637	0.451547	MKS1
ENSG00000011198	0.550545	4.16106	0.449389	0.573398	4.16106	0.427285	0.527109	4.16106	0.472066	1.29713	4.16106	0.00852768	ABHD5
ENSG00000011243	0.0484374	4.65151	0.95053	0.307616	4.65151	0.691252	-0.584954	4.65151	0.419542	1.23438	4.65151	0.0182583	AKAP8L
ENSG00000011258	0.4239	3.4711	0.575272	0.774698	3.4711	0.249089	0.497772	3.4711	0.50177	1.5311	3.4711	0.00129384	MBTD1
ENSG00000011260	0.277296	6.51129	0.721622	0.434479	6.51129	0.569144	-0.125992	6.51129	0.875489	0.354499	6.51129	0.646216	UTP18
ENSG00000011275	0.0759105	5.88835	0.924745	0.249004	5.88835	0.749864	-0.302577	5.88835	0.698161	-1.37759	5.88835	0.00180431	RNF216
ENSG00000011295	-0.0952236	7.30158	0.906171	-0.428972	7.30158	0.572776	-0.0917212	7.30158	0.909688	-0.586853	7.30158	0.416347	TTC19
ENSG00000011304	-0.263513	8.02182	0.73707	-0.35896	8.02182	0.642686	-0.205199	8.02182	0.795225	-0.971984	8.02182	0.0795892	PTBP1
ENSG00000011376	0.359322	4.51423	0.640265	0.646058	4.51423	0.355613	-0.205931	4.51423	0.794398	-0.658864	4.51423	0.347327	LARS2
ENSG00000011405	-0.125064	9.05403	0.875879	-0.132932	9.05403	0.867965	-0.456202	9.05403	0.545343	-0.440652	9.05403	0.561013	PIK3C2A
ENSG00000011422	1.69711	6.60941	0.000105971	2.15116	6.60941	1.65e-07	0.890277	6.60941	0.155353	2.17429	6.60941	1.35e-07	PLAUR
ENSG00000011426	-0.00645712	7.90336	0.994608	-0.0822886	7.90336	0.918768	-0.287273	7.90336	0.713621	-0.0682947	7.90336	0.932762	ANLN
ENSG00000011451	0.0867859	4.97266	0.912571	0.00873433	4.97266	0.990662	0.0573784	4.97266	0.941993	-0.584286	4.97266	0.416832	WIZ
ENSG00000011454	-0.0428969	7.09128	0.958261	-0.127912	7.09128	0.874655	0.0294909	7.09128	0.970624	-0.758074	7.09128	0.247854	RABGAP1
ENSG00000011478	-0.395044	1.56221	0.643758	-1.83767	1.56221	0.0547522	0.860689	1.56221	0.264586	0.819632	1.56221	0.314176	QPCTL
ENSG00000011485	-0.0973436	3.514	0.903045	-0.228857	3.514	0.771075	-0.0378356	3.514	0.963012	-0.382446	3.514	0.617903	PPP5C
ENSG00000011523	-0.546549	3.83898	0.454975	-0.765105	3.83898	0.254302	-0.0966726	3.83898	0.90406	-1.35023	3.83898	0.0120532	CEP68
ENSG00000011566	0.327723	4.38415	0.671135	0.60553	4.38415	0.395951	-0.204229	4.38415	0.796041	0.321684	4.38415	0.677528	MAP4K3
ENSG00000011638	-0.769014	2.6593	0.274079	-0.000365795	2.6593	0.999601	-0.0554207	2.6593	0.94499	0.249532	2.6593	0.750319	TMEM159
ENSG00000012048	-0.0136277	6.88975	0.987254	-0.0869687	6.88975	0.914791	-0.524459	6.88975	0.475962	0.229497	6.88975	0.769272	BRCA1
ENSG00000012061	-0.338288	3.83124	0.661307	-0.33415	3.83124	0.665321	0.503062	3.83124	0.495972	1.26635	3.83124	0.0124041	ERCC1
ENSG00000012171	-0.688168	1.65703	0.371219	-1.12081	1.65703	0.140468	0.490547	1.65703	0.520787	1.081	1.65703	0.112706	SEMA3B
ENSG00000012174	0.0604833	3.65063	0.938731	-0.268854	3.65063	0.730855	0.0827059	3.65063	0.916246	-1.19573	3.65063	0.0435219	MBTPS2
ENSG00000012232	0.380123	3.00023	0.618978	-0.156412	3.00023	0.842598	0.760924	3.00023	0.261347	-0.393651	3.00023	0.60667	EXTL3
ENSG00000012660	0.436078	6.64351	0.57058	0.307485	6.64351	0.691629	0.429576	6.64351	0.577437	0.39479	6.64351	0.610494	ELOVL5
ENSG00000012779	0.607449	1.95528	0.462557	0.451987	1.95528	0.596006	1.87514	1.95528	0.00524262	1.29123	1.95528	0.0964489	ALOX5
ENSG00000012822	0.212143	3.99477	0.786732	0.0270189	3.99477	0.97246	0.188534	3.99477	0.810278	-0.181143	3.99477	0.818486	CALCOCO1
ENSG00000012963	-0.80853	5.37602	0.205568	-1.02239	5.37602	0.0644106	-0.30442	5.37602	0.696301	0.5787	5.37602	0.420422	UBR7
ENSG00000012983	0.0873641	6.43191	0.913803	0.0666562	6.43191	0.934171	-0.162888	6.43191	0.838233	0.710219	6.43191	0.29334	MAP4K5
ENSG00000013275	-0.0146987	6.18647	0.986361	0.00633224	6.18647	0.992613	-0.309532	6.18647	0.691497	-0.111658	6.18647	0.889184	PSMC4
ENSG00000013288	0.0269709	5.36608	0.972338	0.155883	5.36608	0.843141	0.311058	5.36608	0.687954	-0.0125765	5.36608	0.988018	MAN2B2
ENSG00000013297	-0.0683265	7.45518	0.932755	-0.139464	7.45518	0.861399	-0.415837	7.45518	0.585754	-1.7352	7.45518	8.13e-06	CLDN11
ENSG00000013306	-0.292398	5.64968	0.708533	-0.368107	5.64968	0.632957	-0.114305	5.64968	0.886651	-0.574549	5.64968	0.427398	SLC25A39
ENSG00000013364	0.487541	6.09584	0.511617	0.705043	6.09584	0.298672	0.205452	6.09584	0.793217	-0.785505	6.09584	0.229999	MVP
ENSG00000013374	1.13621	8.95445	0.0172536	2.25838	8.95445	8.14e-15	-0.0674134	8.95445	0.934188	0.00315174	8.95445	0.996373	NUB1
ENSG00000013375	0.431164	5.70575	0.570341	0.586612	5.70575	0.41241	0.107504	5.70575	0.892483	-0.0807599	5.70575	0.920017	PGM3
ENSG00000013392	0.440668	2.84428	0.563245	0.589582	2.84428	0.424742	0.974097	2.84428	0.131276	0.308104	2.84428	0.695207	RWDD2A
ENSG00000013441	-0.248863	6.3728	0.751575	-0.252361	6.3728	0.748083	-0.252729	6.3728	0.747726	1.73503	6.3728	9.65e-08	CLK1
ENSG00000013503	-0.200366	3.9048	0.799869	-0.403144	3.9048	0.596835	-0.523109	3.9048	0.477763	-0.96023	3.9048	0.124267	POLR3B
ENSG00000013561	-0.512654	5.98457	0.490259	-0.895621	5.98457	0.156221	-0.329259	5.98457	0.672423	-0.676179	5.98457	0.334616	RNF14
ENSG00000013573	-0.0195355	5.41324	0.981241	-0.299879	5.41324	0.700689	-0.0938574	5.41324	0.907037	0.00214358	5.41324	0.99736	DDX11
ENSG00000013583	-0.314303	5.8437	0.686468	-0.0858156	5.8437	0.915437	0.274013	5.8437	0.724866	-0.793525	5.8437	0.218228	HEBP1
ENSG00000013588	-0.0671185	8.25047	0.933993	-0.369792	8.25047	0.631822	-0.965374	8.25047	0.0851756	-2.4075	8.25047	9.43e-11	GPRC5A
ENSG00000013810	-0.44129	6.59423	0.560452	-0.558458	6.59423	0.441829	-0.318547	6.59423	0.682417	-0.440797	6.59423	0.560797	TACC3
ENSG00000014123	0.269582	5.01276	0.729343	-0.152818	5.01276	0.847539	-0.00793894	5.01276	0.992865	0.511619	5.01276	0.487554	UFL1
ENSG00000014138	-0.0858531	4.49503	0.914713	0.0059965	4.49503	0.99346	0.0817455	4.49503	0.917543	-1.09769	4.49503	0.0532336	POLA2
ENSG00000014164	-0.317148	2.09294	0.684915	0.420628	2.09294	0.584792	0.232568	2.09294	0.766865	-2.04009	2.09294	0.00797852	ZC3H3
ENSG00000014216	-0.570839	5.25556	0.431097	-0.458575	5.25556	0.54254	-0.840472	5.25556	0.18527	-1.23412	5.25556	0.0172849	CAPN1
ENSG00000014641	-0.185966	6.89077	0.814499	-0.497236	6.89077	0.503552	0.342506	6.89077	0.656823	-0.0857816	6.89077	0.915113	MDH1
ENSG00000014824	-0.218621	6.2487	0.781788	-0.204629	6.2487	0.795774	0.133886	6.2487	0.8666	-0.299115	6.2487	0.701564	SLC30A9
ENSG00000014914	1.01285	3.2787	0.101369	2.08302	3.2787	2.11e-06	0.589932	3.2787	0.414786	1.52941	3.2787	0.00275686	MTMR11
ENSG00000014919	-0.0748401	5.0302	0.926082	-0.0450732	5.0302	0.955707	0.163045	5.0302	0.83621	0.0795128	5.0302	0.920508	COX15
ENSG00000015133	-0.0656342	5.33683	0.935203	-0.390153	5.33683	0.61078	-0.536317	5.33683	0.464322	-1.4947	5.33683	0.000831934	CCDC88C
ENSG00000015153	0.00137388	5.17005	0.998139	-0.0507348	5.17005	0.949932	0.412605	5.17005	0.588244	0.056949	5.17005	0.94283	YAF2
ENSG00000015171	-0.151076	6.4736	0.850008	-0.229969	6.4736	0.770438	-0.443739	6.4736	0.560807	-0.247549	6.4736	0.752906	ZMYND11
ENSG00000015475	0.604452	5.12671	0.395093	1.11646	5.12671	0.0282956	0.148584	5.12671	0.850476	0.365	5.12671	0.634592	BID
ENSG00000015532	-0.594858	4.88528	0.408045	-1.00051	4.88528	0.087542	-0.22586	4.88528	0.775067	-1.62758	4.88528	0.000556504	XYLT2
ENSG00000015676	-0.683815	6.18889	0.319922	-0.880918	6.18889	0.147765	-0.892493	6.18889	0.138322	-1.59748	6.18889	0.000123009	NUDCD3
ENSG00000016864	-0.715926	4.24312	0.300574	-0.965682	4.24312	0.122933	-0.277196	4.24312	0.723602	0.298708	4.24312	0.700267	GLT8D1
ENSG00000017260	0.0513959	5.05221	0.948278	0.151466	5.05221	0.847777	0.0251574	5.05221	0.974413	0.0406688	5.05221	0.959034	ATP2C1
ENSG00000017483	0.662108	5.85469	0.343531	1.84936	5.85469	8.88e-06	0.55384	5.85469	0.44682	0.0404239	5.85469	0.958756	SLC38A5
ENSG00000017797	-0.171859	7.5611	0.828887	-0.00412736	7.5611	0.996781	0.183138	7.5611	0.816292	-0.310269	7.5611	0.690656	RALBP1
ENSG00000018189	0.311855	5.05923	0.687219	0.366124	5.05923	0.633635	0.0779771	5.05923	0.921517	-0.24913	5.05923	0.751023	RUFY3
ENSG00000018408	-0.0306021	6.61611	0.970331	-0.0147544	6.61611	0.986092	0.250564	6.61611	0.74818	-0.173549	6.61611	0.826875	WWTR1
ENSG00000018510	-0.126354	5.4614	0.874281	-0.103839	5.4614	0.896947	0.0541452	5.4614	0.945672	-0.833098	5.4614	0.187271	AGPS
ENSG00000018610	0.028833	3.76537	0.970668	-0.275392	3.76537	0.724493	-0.166539	3.76537	0.833859	-0.925094	3.76537	0.14762	STEEP1
ENSG00000018699	0.577454	3.78088	0.424644	0.512279	3.78088	0.488304	-0.100107	3.78088	0.900296	-0.430065	3.78088	0.570559	TTC27
ENSG00000019144	0.327089	3.76557	0.671742	0.153596	3.76557	0.845427	-0.656643	3.76557	0.349599	-0.994103	3.76557	0.109759	PHLDB1
ENSG00000019485	-1.02313	3.91327	0.0978997	-0.873606	3.91327	0.183694	-0.279756	3.91327	0.720932	0.156502	3.91327	0.842576	PRDM11
ENSG00000019582	2.97376	1.83444	0.000537975	4.67197	1.83444	8.01e-09	2.84838	1.83444	0.000696875	1.38854	1.83444	0.205879	CD74
ENSG00000019995	-0.56818	4.65738	0.432845	-0.281536	4.65738	0.718768	-0.128348	4.65738	0.872215	0.339495	4.65738	0.659639	ZRANB1
ENSG00000020129	0.228368	4.05276	0.770369	0.207306	4.05276	0.791548	0.0300172	4.05276	0.968917	-0.744464	4.05276	0.280953	NCDN
ENSG00000020256	-0.735291	3.01014	0.289919	-0.640902	3.01014	0.37203	0.00254371	3.01014	0.996503	-1.86836	3.01014	0.00137669	ZFP64
ENSG00000020426	0.272228	5.53721	0.72673	0.353033	5.53721	0.646267	0.299561	5.53721	0.699425	0.538715	5.53721	0.460402	MNAT1
ENSG00000020577	0.578104	5.53297	0.420922	0.797019	5.53297	0.213251	-0.392162	5.53297	0.610543	0.626152	5.53297	0.3738	SAMD4A
ENSG00000020633	0.894411	3.73241	0.16652	2.5992	3.73241	1.99e-09	0.801532	3.73241	0.230213	1.65557	3.73241	0.00080515	RUNX3
ENSG00000020922	-0.275227	6.64927	0.725383	-0.687337	6.64927	0.314987	-0.225808	6.64927	0.774584	-0.995128	6.64927	0.0698689	MRE11
ENSG00000021355	0.169077	5.63599	0.829909	0.683715	5.63599	0.317488	0.255862	5.63599	0.743006	-0.370173	5.63599	0.630458	SERPINB1
ENSG00000021574	-0.523422	4.57859	0.477117	-0.577755	4.57859	0.423506	-0.270122	4.57859	0.730396	-0.446475	4.57859	0.553647	SPAST
ENSG00000021762	-0.535012	4.99296	0.465875	0.0433581	4.99296	0.95571	0.00265146	4.99296	0.996386	-1.23687	4.99296	0.0158416	OSBPL5
ENSG00000021776	-0.0193432	5.76219	0.98145	-0.138295	5.76219	0.862278	0.0492666	5.76219	0.950651	-0.269617	5.76219	0.730845	AQR
ENSG00000022267	-0.664882	6.0508	0.336828	-0.938274	6.0508	0.104098	0.0433171	6.0508	0.95625	-0.225618	6.0508	0.77482	FHL1
ENSG00000022277	-0.16852	6.70088	0.831953	-0.0812552	6.70088	0.919779	-0.344303	6.70088	0.656934	-0.242903	6.70088	0.757534	RTF2
ENSG00000022840	-0.0195953	7.41263	0.981586	0.0301144	7.41263	0.96871	0.184155	7.41263	0.814443	0.109698	7.41263	0.889077	RNF10
ENSG00000023041	0.226713	6.14333	0.772117	0.460335	6.14333	0.54079	0.288607	6.14333	0.710351	0.707283	6.14333	0.294655	ZDHHC6
ENSG00000023171	0.560862	4.99159	0.438277	-0.112317	4.99159	0.88804	1.11098	4.99159	0.0293494	-0.287697	4.99159	0.712317	GRAMD1B
ENSG00000023191	0.0160776	6.12443	0.98363	-0.12085	6.12443	0.880229	0.117032	6.12443	0.883236	-0.276311	6.12443	0.724221	RNH1
ENSG00000023228	-0.320169	6.45256	0.680743	-0.411023	6.45256	0.593937	-0.0467655	6.45256	0.954517	-0.948612	6.45256	0.0975727	NDUFS1
ENSG00000023287	0.232939	7.51444	0.765762	0.172115	7.51444	0.826723	0.571231	7.51444	0.427316	0.672003	7.51444	0.328243	RB1CC1
ENSG00000023318	0.275609	6.11296	0.723333	0.591512	6.11296	0.407481	-0.174757	6.11296	0.82571	0.629695	6.11296	0.370058	ERP44
ENSG00000023330	0.531447	4.26399	0.473523	0.623652	4.26399	0.38832	0.279457	4.26399	0.719392	0.176085	4.26399	0.823699	ALAS1
ENSG00000023445	2.36516	7.60147	1.28e-13	3.4812	7.60147	2.19e-21	1.28542	7.60147	0.00280756	3.51566	7.60147	1.59e-21	BIRC3
ENSG00000023516	0.0974869	5.56862	0.901807	0.0966729	5.56862	0.902632	0.0104908	5.56862	0.988779	-0.803051	5.56862	0.212097	AKAP11
ENSG00000023572	-0.18916	5.02325	0.811351	-0.191465	5.02325	0.809006	-0.276321	5.02325	0.724297	0.290179	5.02325	0.708836	GLRX2
ENSG00000023608	-0.0652009	8.86113	0.936541	-0.218806	8.86113	0.781692	0.0220099	8.86113	0.977945	-0.301812	8.86113	0.699151	SNAPC1
ENSG00000023697	-0.306659	4.51438	0.694274	-0.513322	4.51438	0.490349	0.299749	4.51438	0.698784	0.622742	4.51438	0.383508	DERA
ENSG00000023734	-0.35368	6.84183	0.648049	-0.274111	6.84183	0.726482	-0.179112	6.84183	0.82133	-0.0178997	6.84183	0.982951	STRAP
ENSG00000023839	0.852029	1.04863	0.343387	0.060009	1.04863	0.96078	0.178593	1.04863	0.851202	4.75714	1.04863	2.8e-11	ABCC2
ENSG00000023902	0.0493682	7.08775	0.949658	0.432406	7.08775	0.5671	-0.00371769	7.08775	0.997307	-0.150503	7.08775	0.850219	PLEKHO1
ENSG00000023909	-0.567206	7.52296	0.43371	-0.103118	7.52296	0.897895	-0.27798	7.52296	0.722913	-1.94617	7.52296	3.89e-07	GCLM
ENSG00000024048	0.0552358	6.0962	0.945229	0.30687	6.0962	0.692233	-0.43813	6.0962	0.566287	-0.49772	6.0962	0.502714	UBR2
ENSG00000024422	0.0782038	6.36241	0.92065	-0.144107	6.36241	0.856778	-0.582766	6.36241	0.418692	-1.79103	6.36241	1.58e-05	EHD2
ENSG00000024526	-0.566092	5.87488	0.434306	-0.687524	5.87488	0.315165	-0.102247	5.87488	0.899201	-0.0658819	5.87488	0.935311	DEPDC1
ENSG00000024862	-0.185521	5.55742	0.814896	-0.104643	5.55742	0.895961	-0.236295	5.55742	0.764163	0.497952	5.55742	0.501269	CCDC28A
ENSG00000025156	-0.429951	6.03342	0.571591	-0.57611	6.03342	0.427256	0.00874988	6.03342	0.989865	1.12642	6.03342	0.0353627	HSF2
ENSG00000025293	-0.194515	6.15105	0.805919	-0.423444	6.15105	0.579011	-0.14922	6.15105	0.851373	-0.505198	6.15105	0.495337	PHF20
ENSG00000025434	-0.54907	2.10285	0.465579	-0.514432	2.10285	0.497916	0.393129	2.10285	0.607118	-0.0513436	2.10285	0.946788	NR1H3
ENSG00000025708	1.72487	7.32508	5.2e-06	2.59458	7.32508	1.17e-12	0.42847	7.32508	0.570757	1.53554	7.32508	0.000143966	TYMP
ENSG00000025770	-0.753624	5.84339	0.271624	-1.02536	5.84339	0.0941631	-1.03054	5.84339	0.0897513	-0.901544	5.84339	0.164042	NCAPH2
ENSG00000025772	-0.16093	5.7858	0.839559	0.00761482	5.7858	0.991704	-0.0592235	5.7858	0.941679	0.553413	5.7858	0.445511	TOMM34
ENSG00000025796	0.161327	7.32476	0.839492	0.186342	7.32476	0.813079	0.231235	7.32476	0.767438	-0.0319588	7.32476	0.969001	SEC63
ENSG00000025800	-0.0270986	7.71148	0.973902	-0.174841	7.71148	0.825655	-0.114961	7.71148	0.886551	-1.14195	7.71148	0.0176344	KPNA6
ENSG00000026025	0.427377	9.4355	0.573716	0.61511	9.4355	0.383758	-0.148508	9.4355	0.85221	0.176131	9.4355	0.822736	VIM
ENSG00000026103	0.882156	3.37995	0.183634	1.32424	3.37995	0.0187915	0.632681	3.37995	0.378721	3.14689	3.37995	1.4e-11	FAS
ENSG00000026297	0.273485	2.52965	0.725355	-0.197028	2.52965	0.802097	-0.0170224	2.52965	0.98368	-0.737994	2.52965	0.308617	RNASET2
ENSG00000026508	2.2852	7.68975	1.17e-14	2.70194	7.68975	3.25e-18	0.168585	7.68975	0.830787	0.821229	7.68975	0.189819	CD44
ENSG00000026652	-0.180446	3.03454	0.819576	-0.607904	3.03454	0.401931	-0.0309024	3.03454	0.969954	-1.91161	3.03454	0.00115312	AGPAT4
ENSG00000026950	0.997922	5.10096	0.0752906	1.42681	5.10096	0.000639832	0.0528092	5.10096	0.946893	1.25834	5.10096	0.00749966	BTN3A1
ENSG00000027001	-0.0415194	3.32224	0.958839	-0.273956	3.32224	0.725496	0.102309	3.32224	0.896545	-0.0366092	3.32224	0.963104	MIPEP
ENSG00000027075	0.129945	5.91845	0.869995	0.253861	5.91845	0.745047	0.469455	5.91845	0.531577	0.180548	5.91845	0.818431	PRKCH
ENSG00000027697	0.0256347	4.89657	0.972956	0.31376	4.89657	0.68564	0.613676	4.89657	0.395263	0.605009	4.89657	0.405907	IFNGR1
ENSG00000027847	-0.0146035	5.18402	0.986142	-0.0870275	5.18402	0.913535	-0.107429	5.18402	0.893172	-0.812402	5.18402	0.206719	B4GALT7
ENSG00000027869	0.84592	1.77416	0.236399	0.285558	1.77416	0.720158	-0.522732	1.77416	0.500286	-1.62098	1.77416	0.0446144	SH2D2A
ENSG00000028116	0.213441	5.38584	0.785358	0.7512	5.38584	0.257296	-0.130678	5.38584	0.870018	0.147403	5.38584	0.851644	VRK2
ENSG00000028137	0.796826	7.02187	0.219411	1.42497	7.02187	0.00140122	0.061138	7.02187	0.937426	-2.32901	7.02187	1.14e-07	TNFRSF1B
ENSG00000028203	0.266687	6.17849	0.73221	0.556885	6.17849	0.441908	-0.336116	6.17849	0.664779	-0.475612	6.17849	0.526163	VEZT
ENSG00000028277	4.39076	5.24799	8.84e-23	5.03052	5.24799	2.59e-25	0.945072	5.24799	0.11997	1.21219	5.24799	0.0260091	POU2F2
ENSG00000028310	-0.143137	6.35834	0.857568	-0.0274997	6.35834	0.973459	-0.68762	6.35834	0.315321	-1.54627	6.35834	0.000155972	BRD9
ENSG00000028528	0.0693376	7.06526	0.929089	-0.157447	7.06526	0.843937	0.0260016	7.06526	0.972443	-0.678196	7.06526	0.329808	SNX1
ENSG00000028839	-0.179317	3.00372	0.82016	0.0999215	3.00372	0.89944	-0.234701	3.00372	0.765055	1.11595	3.00372	0.0559536	TBPL1
ENSG00000029153	0.2651	4.62655	0.733815	0.998537	4.62655	0.0795428	0.472264	4.62655	0.526794	0.624581	4.62655	0.377153	ARNTL2
ENSG00000029363	0.185423	7.76645	0.813919	-0.0362211	7.76645	0.964873	0.0176567	7.76645	0.982228	0.636717	7.76645	0.362408	BCLAF1
ENSG00000029364	-0.147833	5.307	0.852662	-0.447916	5.307	0.553604	0.117972	5.307	0.88196	0.254238	5.307	0.744769	SLC39A9
ENSG00000029639	0.339327	3.23659	0.659431	0.724733	3.23659	0.291868	0.362506	3.23659	0.635899	-0.0603319	3.23659	0.938753	TFB1M
ENSG00000029725	0.182384	6.76924	0.816486	-0.0402491	6.76924	0.960797	0.0173529	6.76924	0.982257	-0.075568	6.76924	0.925631	RABEP1
ENSG00000029993	-0.48574	5.20426	0.51479	-0.881856	5.20426	0.148753	-0.515202	5.20426	0.485279	-0.0150945	5.20426	0.985631	HMGB3
ENSG00000030066	0.0494406	4.44469	0.949674	0.146395	4.44469	0.852572	-0.0362343	4.44469	0.964573	-0.591434	4.44469	0.412093	NUP160
ENSG00000030110	0.072351	4.26547	0.926274	0.440726	4.26547	0.559422	-0.556056	4.26547	0.450117	-0.733559	4.26547	0.296412	BAK1
ENSG00000030419	-0.384945	3.51516	0.615252	0.930125	3.51516	0.13611	0.309071	3.51516	0.689441	-0.932157	3.51516	0.162806	IKZF2
ENSG00000030582	-0.0805094	7.87975	0.921113	-0.0339832	7.87975	0.967665	-0.384289	7.87975	0.617656	-0.448159	7.87975	0.553993	GRN
ENSG00000031003	-0.222886	4.02158	0.777433	-0.319482	4.02158	0.680718	-0.260323	4.02158	0.740154	0.226597	4.02158	0.772483	FAM13B
ENSG00000031081	0.284542	5.48128	0.714006	0.486317	5.48128	0.513669	0.286912	5.48128	0.711573	-0.521321	5.48128	0.482505	ARHGAP31
ENSG00000031691	-0.360955	6.25896	0.640096	-0.106446	6.25896	0.894357	0.631069	6.25896	0.368945	0.494076	6.25896	0.505147	CENPQ
ENSG00000031698	0.192399	7.1848	0.806361	0.181981	7.1848	0.816825	-0.17419	7.1848	0.826272	-0.52653	7.1848	0.473907	SARS1
ENSG00000031823	-0.0414562	4.0531	0.959138	0.0478692	4.0531	0.951496	-0.120465	4.0531	0.880069	-0.967643	4.0531	0.118213	RANBP3
ENSG00000032219	-0.23039	6.89054	0.769999	-0.50426	6.89054	0.496348	0.0384548	6.89054	0.960924	-0.494036	6.89054	0.506643	ARID4A
ENSG00000032389	-0.477827	3.80542	0.52261	-0.0617291	3.80542	0.938733	-0.146758	3.80542	0.853701	-1.10696	3.80542	0.0623841	EIPR1
ENSG00000032444	-0.479476	2.93073	0.522433	-1.16125	2.93073	0.0608559	-0.0489446	2.93073	0.951699	-0.725665	2.93073	0.305247	PNPLA6
ENSG00000032742	-0.115059	3.94294	0.885135	-0.000304935	3.94294	1.00016	-0.0599937	3.94294	0.94061	0.456356	3.94294	0.543085	IFT88
ENSG00000033011	-0.348646	2.20168	0.652088	-0.370196	2.20168	0.631155	-0.173316	2.20168	0.826644	-1.36865	2.20168	0.0419274	ALG1
ENSG00000033030	0.104749	5.49713	0.894993	0.0733443	5.49713	0.926466	0.0693428	5.49713	0.930477	1.3391	5.49713	0.00160059	ZCCHC8
ENSG00000033050	0.205772	5.15292	0.793114	0.125505	5.15292	0.873655	0.0582248	5.15292	0.941048	-0.65303	5.15292	0.349983	ABCF2
ENSG00000033100	-0.214185	2.46704	0.784809	0.364468	2.46704	0.635988	0.278951	2.46704	0.719381	-0.0688104	2.46704	0.929405	CHPF2
ENSG00000033170	0.651071	4.82552	0.350088	0.713401	4.82552	0.291233	0.54307	4.82552	0.455906	-0.00784635	4.82552	0.99249	FUT8
ENSG00000033178	0.603872	6.78843	0.3949	1.09341	6.78843	0.0275689	-0.104356	6.78843	0.898053	0.219905	6.78843	0.778958	UBA6
ENSG00000033327	-0.679163	4.66795	0.328466	-0.767332	4.66795	0.250563	0.0329548	4.66795	0.96586	-1.83743	4.66795	0.000121477	GAB2
ENSG00000033627	0.0371167	5.42135	0.962314	-0.198276	5.42135	0.802109	-0.52367	5.42135	0.476685	0.340331	5.42135	0.65916	ATP6V0A1
ENSG00000033800	0.0429169	5.6757	0.957046	-0.134897	5.6757	0.865799	0.0507402	5.6757	0.9493	-0.661572	5.6757	0.340755	PIAS1
ENSG00000033867	0.57039	5.78814	0.428487	0.688463	5.78814	0.312766	0.0981356	5.78814	0.901618	-0.534005	5.78814	0.466289	SLC4A7
ENSG00000034053	-0.669653	2.07858	0.356711	-1.38861	2.07858	0.0308739	-0.383288	2.07858	0.618081	-1.2135	2.07858	0.074096	APBA2
ENSG00000034152	0.942374	5.94987	0.13997	1.28314	5.94987	0.0212013	-0.572076	5.94987	0.438294	0.950945	5.94987	0.136965	MAP2K3
ENSG00000034510	0.0914793	8.6092	0.908672	0.711225	8.6092	0.2904	-0.667816	8.6092	0.333813	-0.416074	8.6092	0.587298	TMSB10
ENSG00000034533	0.200857	2.18318	0.799593	0.0950001	2.18318	0.906278	0.521578	2.18318	0.484685	1.05561	2.18318	0.107571	ASTE1
ENSG00000034677	-0.197714	5.74351	0.802662	0.437731	5.74351	0.562382	-0.0972602	5.74351	0.903468	1.00697	5.74351	0.0647936	RNF19A
ENSG00000034693	-0.16571	3.52836	0.834291	-0.0556271	3.52836	0.944559	0.172512	3.52836	0.82606	0.36622	3.52836	0.633552	PEX3
ENSG00000034713	0.11832	6.87119	0.880613	0.385928	6.87119	0.61349	0.501146	6.87119	0.497951	1.17232	6.87119	0.0145475	GABARAPL2
ENSG00000035115	-0.41929	2.60736	0.582108	-0.595022	2.60736	0.418914	0.0859056	2.60736	0.913189	0.39046	2.60736	0.610608	SH3YL1
ENSG00000035141	-0.461412	5.0207	0.539247	-0.560295	5.0207	0.440339	-0.282214	5.0207	0.7184	-0.555665	5.0207	0.445005	FAM136A
ENSG00000035403	-0.179355	7.23658	0.821093	-0.050899	7.23658	0.950344	-0.318582	7.23658	0.682421	-0.301198	7.23658	0.699609	VCL
ENSG00000035499	-0.778371	3.4564	0.246157	-1.19343	3.4564	0.036282	-0.716032	3.4564	0.296981	0.0271631	3.4564	0.972239	DEPDC1B
ENSG00000035664	-0.937582	1.71562	0.206759	-1.50431	1.71562	0.0421945	0.292811	1.71562	0.708725	-0.774688	1.71562	0.319882	DAPK2
ENSG00000035681	0.597819	4.71865	0.402035	0.315878	4.71865	0.683156	-0.178627	4.71865	0.8217	0.345714	4.71865	0.653495	NSMAF
ENSG00000035687	0.567407	6.57862	0.431262	0.816021	6.57862	0.194014	0.139057	6.57862	0.860925	-0.815986	6.57862	0.197423	ADSS2
ENSG00000035862	-0.331688	9.31944	0.669598	-0.707839	9.31944	0.29532	-0.118708	9.31944	0.88227	0.00621524	9.31944	0.992878	TIMP2
ENSG00000035928	-0.00482279	7.8037	0.996104	-0.349499	7.8037	0.652152	0.249743	7.8037	0.748937	-0.226827	7.8037	0.773601	RFC1
ENSG00000036054	0.154427	5.20361	0.844608	0.321752	5.20361	0.677425	-0.154919	5.20361	0.84552	0.572996	5.20361	0.426374	TBC1D23
ENSG00000036257	0.5013	5.25994	0.497786	0.285357	5.25994	0.713661	0.33212	5.25994	0.66694	0.27405	5.25994	0.72506	CUL3
ENSG00000036448	0.775611	1.75939	0.325351	0.262593	1.75939	0.761666	-0.761974	1.75939	0.364592	4.71267	1.75939	9.86e-14	MYOM2
ENSG00000036549	0.100885	6.00435	0.900434	0.242622	6.00435	0.756242	-0.316666	6.00435	0.68412	0.510591	6.00435	0.488475	ZZZ3
ENSG00000037042	-0.178526	3.4446	0.821338	0.157312	3.4446	0.84179	1.01658	3.4446	0.0820305	0.029297	3.4446	0.970568	TUBG2
ENSG00000037241	0.159918	5.62999	0.839052	0.247285	5.62999	0.751648	0.178048	5.62999	0.82081	1.60952	5.62999	1.34e-05	RPL26L1
ENSG00000037474	0.168026	5.69252	0.830822	0.370554	5.69252	0.628764	-0.577633	5.69252	0.423116	0.240206	5.69252	0.75866	NSUN2
ENSG00000037637	-0.349682	3.65174	0.650384	-0.625377	3.65174	0.380232	-0.210997	3.65174	0.789443	-1.65495	3.65174	0.00136294	FBXO42
ENSG00000037749	0.358466	3.3657	0.640295	0.00312198	3.3657	0.996787	0.15899	3.3657	0.839861	0.30618	3.3657	0.693283	MFAP3
ENSG00000037897	0.749999	4.97546	0.270616	0.848119	4.97546	0.193816	-0.523774	4.97546	0.48105	-2.3219	4.97546	3.05e-05	METTL1
ENSG00000038002	-0.0263567	4.25675	0.97428	-0.532613	4.25675	0.468255	-0.174958	4.25675	0.825428	0.694381	4.25675	0.311311	AGA
ENSG00000038210	0.452416	3.82963	0.547477	0.860334	3.82963	0.182602	0.0430355	3.82963	0.956206	0.582178	3.82963	0.423296	PI4K2B
ENSG00000038219	0.299831	7.87521	0.699168	0.208577	7.87521	0.790122	0.108475	7.87521	0.891075	-0.578701	7.87521	0.421637	BOD1L1
ENSG00000038274	-0.0241045	5.73161	0.976748	0.00946853	5.73161	0.989675	0.473708	5.73161	0.525432	0.634031	5.73161	0.366765	MAT2B
ENSG00000038358	0.594869	1.54044	0.443904	-0.0046097	1.54044	0.991566	-0.0100267	1.54044	0.988204	0.194391	1.54044	0.819079	EDC4
ENSG00000038382	0.567115	6.7645	0.431518	0.595259	6.7645	0.403443	-0.429289	6.7645	0.572934	-0.665173	6.7645	0.336524	TRIO
ENSG00000038532	-0.290474	3.83134	0.709666	-0.480071	3.83134	0.520436	-0.322616	3.83134	0.677679	-0.952463	3.83134	0.127853	CLEC16A
ENSG00000039123	0.101323	7.31963	0.898162	-0.0955142	7.31963	0.905521	-0.511337	7.31963	0.489264	-1.33427	7.31963	0.00148951	MTREX
ENSG00000039139	1.28994	2.31944	0.0378333	1.20886	2.31944	0.0592759	0.792077	2.31944	0.262548	-0.973408	2.31944	0.222386	DNAH5
ENSG00000039319	-0.0728325	5.97729	0.928078	-0.104028	5.97729	0.896745	-0.0277152	5.97729	0.973125	-0.297136	5.97729	0.703419	ZFYVE16
ENSG00000039523	0.736555	5.99389	0.266967	0.727064	5.99389	0.275959	0.262384	5.99389	0.736484	-0.0308678	5.99389	0.969811	RIPOR1
ENSG00000039560	0.303408	8.13423	0.695615	0.495658	8.13423	0.504976	0.146123	8.13423	0.856015	0.00400725	8.13423	0.995709	RAI14
ENSG00000039650	0.117226	4.97859	0.881478	0.286472	4.97859	0.712256	-0.102568	4.97859	0.898455	-1.30262	4.97859	0.0135361	PNKP
ENSG00000040199	0.210432	3.3401	0.788471	0.192426	3.3401	0.806666	-0.287684	3.3401	0.711866	0.805028	3.3401	0.226101	PHLPP2
ENSG00000040275	-0.624054	7.83836	0.376584	-0.717138	7.83836	0.286121	-0.673843	7.83836	0.327844	-0.431371	7.83836	0.570671	SPDL1
ENSG00000040341	-0.693967	4.84673	0.310582	-0.804578	4.84673	0.211987	0.0783339	4.84673	0.921205	-0.975766	4.84673	0.095218	STAU2
ENSG00000040487	0.0571006	4.39901	0.942274	-0.0242621	4.39901	0.976349	0.311359	4.39901	0.687587	-1.29035	4.39901	0.0155372	SLC66A1
ENSG00000040531	0.2145	4.39134	0.784142	-0.118089	4.39134	0.882619	0.118676	4.39134	0.879956	-0.643616	4.39134	0.366638	CTNS
ENSG00000040608	-1.19261	2.29537	0.062509	-1.44973	2.29537	0.0205332	-1.14776	2.29537	0.0698763	-2.29901	2.29537	0.00051452	RTN4R
ENSG00000040633	0.215474	5.90776	0.783334	0.16793	5.90776	0.830972	0.020397	5.90776	0.978777	-1.42552	5.90776	0.00111545	PHF23
ENSG00000040933	-0.753205	3.51374	0.270269	-0.960637	3.51374	0.128496	-0.4917	3.51374	0.510196	-1.25269	3.51374	0.0329218	INPP4A
ENSG00000041353	1.23376	1.68621	0.110206	1.32583	1.68621	0.0852136	0.315728	1.68621	0.710418	-0.033159	1.68621	0.964018	RAB27B
ENSG00000041357	0.769674	8.31178	0.235293	1.37509	8.31178	0.000424783	0.116259	8.31178	0.884781	0.0427212	8.31178	0.95755	PSMA4
ENSG00000041802	0.153243	6.8853	0.845948	0.0525608	6.8853	0.94705	0.0475901	6.8853	0.952002	-0.274774	6.8853	0.725805	LSG1
ENSG00000041880	0.0237448	4.93896	0.975088	0.370243	4.93896	0.628737	-0.441643	4.93896	0.559916	-0.98522	4.93896	0.116472	PARP3
ENSG00000041988	-0.0250128	4.6481	0.97629	0.020492	4.6481	0.978207	-0.396654	4.6481	0.604949	-1.14858	4.6481	0.0532004	THAP3
ENSG00000042062	2.32618	3.99205	6.16e-05	2.37696	3.99205	4.43e-05	2.38697	3.99205	3.08e-05	-0.338127	3.99205	0.684331	RIPOR3
ENSG00000042088	0.00881769	4.84457	0.990648	-0.254495	4.84457	0.745813	0.142286	4.84457	0.856883	-0.110313	4.84457	0.890002	TDP1
ENSG00000042286	0.339997	5.85623	0.659485	0.604701	5.85623	0.394382	-0.259415	5.85623	0.741086	-0.8139	5.85623	0.201872	AIFM2
ENSG00000042317	-0.372943	2.26573	0.629055	-0.606274	2.26573	0.415301	0.0448352	2.26573	0.954237	-0.0341019	2.26573	0.964263	SPATA7
ENSG00000042429	0.0815929	4.5436	0.91783	0.0214161	4.5436	0.978141	0.0603967	4.5436	0.939013	0.941371	4.5436	0.112406	MED17
ENSG00000042445	-0.662756	6.20063	0.339158	-1.241	6.20063	0.00703497	-0.298656	6.20063	0.702147	-0.847127	6.20063	0.171404	RETSAT
ENSG00000042493	-0.77712	6.64195	0.256773	-0.535962	6.64195	0.471415	-0.887962	6.64195	0.175112	-0.616912	6.64195	0.395799	CAPG
ENSG00000042753	-0.371027	7.67643	0.631316	-0.472773	7.67643	0.530313	-0.687309	7.67643	0.324524	-0.921223	7.67643	0.140983	AP2S1
ENSG00000043093	0.0315365	4.60297	0.967676	-0.227188	4.60297	0.773056	0.0269008	4.60297	0.972217	-0.0462272	4.60297	0.954162	DCUN1D1
ENSG00000043143	0.316093	6.17523	0.683052	0.892418	6.17523	0.132835	-0.605885	6.17523	0.394625	0.681021	6.17523	0.319776	JADE2
ENSG00000043514	-0.183714	3.70092	0.81629	-0.289712	3.70092	0.710009	0.373183	3.70092	0.625454	-0.00813528	3.70092	0.99194	TRIT1
ENSG00000043591	-0.0416665	5.27629	0.95913	-0.655824	5.27629	0.34636	-0.511219	5.27629	0.489267	-0.827137	5.27629	0.192272	ADRB1
ENSG00000044090	-0.0781943	2.25663	0.920812	0.217818	2.25663	0.782847	0.562583	2.25663	0.445902	0.507038	2.25663	0.503457	CUL7
ENSG00000044115	0.332974	7.4578	0.666383	0.467299	7.4578	0.534112	-0.179139	7.4578	0.821317	0.306199	7.4578	0.692901	CTNNA1
ENSG00000044446	-0.770548	3.05403	0.260863	-1.0038	3.05403	0.11592	0.264453	3.05403	0.734009	-0.586856	3.05403	0.422095	PHKA2
ENSG00000044459	-0.169855	7.00669	0.83061	-0.249105	7.00669	0.751343	-0.0394495	7.00669	0.961666	0.00131592	7.00669	0.998145	CNTLN
ENSG00000044574	0.938582	10.6717	0.110329	1.31647	10.6717	0.00402336	-0.583292	10.6717	0.418971	-1.40724	10.6717	0.00168787	HSPA5
ENSG00000046647	-0.488222	3.06319	0.515621	-0.174032	3.06319	0.825976	-0.133894	3.06319	0.866694	-0.565872	3.06319	0.445073	GEMIN8
ENSG00000046651	0.535005	5.94764	0.463882	0.535209	5.94764	0.463717	0.295145	5.94764	0.703849	1.03284	5.94764	0.0529715	OFD1
ENSG00000047056	0.125836	2.82253	0.873659	0.113497	2.82253	0.88628	0.0915495	2.82253	0.907322	0.333074	2.82253	0.668965	WDR37
ENSG00000047188	-0.195069	5.28687	0.805383	-0.355469	5.28687	0.645549	-0.164837	5.28687	0.83568	-0.218965	5.28687	0.781411	YTHDC2
ENSG00000047230	-0.661525	3.63578	0.34682	-0.637609	3.63578	0.369418	-0.0255685	3.63578	0.975274	-0.807642	3.63578	0.227761	CTPS2
ENSG00000047249	-0.135995	5.15641	0.864876	-0.388705	5.15641	0.61224	0.220425	5.15641	0.778129	0.671441	5.15641	0.334323	ATP6V1H
ENSG00000047315	0.554171	6.03943	0.444642	0.554386	6.03943	0.444466	0.271559	6.03943	0.727334	0.0793694	6.03943	0.920208	POLR2B
ENSG00000047346	0.170899	4.59969	0.827889	-0.13387	4.59969	0.866617	0.621393	4.59969	0.381964	0.791673	4.59969	0.232299	FAM214A
ENSG00000047410	0.360574	9.18235	0.640189	0.318508	9.18235	0.68062	0.066076	9.18235	0.934081	0.265346	9.18235	0.733416	TPR
ENSG00000047457	-3.16759	0.275091	0.0896985	-0.372074	0.275091	0.773869	0.574078	0.275091	0.604827	4.90392	0.275091	1.69e-08	CP
ENSG00000047578	0.450451	3.07359	0.549689	0.12273	3.07359	0.876776	-0.0834326	3.07359	0.916778	-0.803086	3.07359	0.251464	KATNIP
ENSG00000047579	0.214294	5.70959	0.784561	0.0356698	5.70959	0.96372	0.0284675	5.70959	0.970875	-0.010319	5.70959	0.990339	DTNBP1
ENSG00000047621	0.0181398	6.20931	0.981742	-0.016027	6.20931	0.984816	-0.614693	6.20931	0.3859	-0.350891	6.20931	0.650642	C12orf4
ENSG00000047634	0.332713	3.06379	0.670579	0.00283184	3.06379	0.998614	0.477021	3.06379	0.529414	2.23452	3.06379	1.48e-05	SCML1
ENSG00000047644	-0.359989	6.09896	0.641479	-0.563215	6.09896	0.437138	0.344353	6.09896	0.655428	-0.147544	6.09896	0.85294	WWC3
ENSG00000047648	-0.208562	2.90602	0.79056	0.539404	2.90602	0.463824	0.59064	2.90602	0.413586	0.146442	2.90602	0.853579	ARHGAP6
ENSG00000047849	-0.0175328	8.48089	0.983449	0.188049	8.48089	0.812067	-0.382908	8.48089	0.624496	-0.394948	8.48089	0.613853	MAP4
ENSG00000047932	-0.0254248	6.00867	0.975404	-0.133905	6.00867	0.867603	-0.0173523	6.00867	0.983484	0.33327	6.00867	0.666007	GOPC
ENSG00000048028	0.517838	5.19224	0.481131	0.645576	5.19224	0.354999	0.337367	5.19224	0.662149	0.192654	5.19224	0.806526	USP28
ENSG00000048052	2.3305	4.68997	1.58e-07	2.62377	4.68997	3.25e-09	0.0873562	4.68997	0.912922	5.47458	4.68997	1.31e-22	HDAC9
ENSG00000048140	-0.63322	4.35707	0.372239	-0.284527	4.35707	0.716121	-0.357758	4.35707	0.643116	-1.44055	4.35707	0.00561483	TSPAN17
ENSG00000048162	0.449759	5.12865	0.550077	0.243498	5.12865	0.755441	-0.0190708	5.12865	0.981697	0.52123	5.12865	0.477908	NOP16
ENSG00000048392	0.167794	4.50922	0.831039	-0.0528025	4.50922	0.947795	0.196449	4.50922	0.802183	1.12508	4.50922	0.0383887	RRM2B
ENSG00000048405	0.0623751	4.49088	0.936814	0.0611488	4.49088	0.938101	0.113531	4.49088	0.885416	-0.329631	4.49088	0.670261	ZNF800
ENSG00000048471	-0.101909	2.71045	0.898187	-1.06176	2.71045	0.100517	-0.422718	2.71045	0.578141	-0.832864	2.71045	0.231631	SNX29
ENSG00000048544	-0.204952	6.21744	0.795468	-0.251428	6.21744	0.749073	-0.387542	6.21744	0.614481	-0.870025	6.21744	0.152958	MRPS10
ENSG00000048649	0.269958	7.9596	0.728825	0.446736	7.9596	0.561973	0.0635555	7.9596	0.937252	-0.898588	7.9596	0.128266	RSF1
ENSG00000048707	-0.208077	4.97101	0.792365	-0.165258	4.97101	0.835182	-0.752186	4.97101	0.256333	-1.30245	4.97101	0.00811253	VPS13D
ENSG00000048828	-0.261969	9.41505	0.738738	-0.230648	9.41505	0.769925	-0.404074	9.41505	0.598778	-0.569765	9.41505	0.430725	FAM120A
ENSG00000048991	-0.151754	5.14145	0.848725	-0.499966	5.14145	0.500403	0.027407	5.14145	0.971965	-0.195046	5.14145	0.805293	R3HDM1
ENSG00000049130	1.75354	3.91212	0.000253398	1.36032	3.91212	0.0116685	-0.61466	3.91212	0.399089	0.312665	3.91212	0.688123	KITLG
ENSG00000049167	-0.191621	1.84491	0.809234	-0.486848	1.84491	0.536931	0.591068	1.84491	0.430678	-0.469864	1.84491	0.557462	ERCC8
ENSG00000049192	1.75065	5.05909	0.000509226	2.17179	5.05909	5.38e-06	0.0750403	5.05909	0.923663	1.40398	5.05909	0.0120824	ADAMTS6
ENSG00000049239	-0.561244	3.88005	0.441236	-0.494695	3.88005	0.506367	0.528756	3.88005	0.4708	-1.25111	3.88005	0.0273403	H6PD
ENSG00000049245	0.176492	6.21753	0.822711	0.311982	6.21753	0.687153	0.154819	6.21753	0.845068	-0.379612	6.21753	0.622981	VAMP3
ENSG00000049246	-0.11345	3.45589	0.886526	-0.0803055	3.45589	0.919636	0.384576	3.45589	0.614031	0.574205	3.45589	0.428726	PER3
ENSG00000049249	2.57262	1.17482	0.00454736	3.83023	1.17482	5.18e-06	0.87949	1.17482	0.394746	5.04349	1.17482	1.57e-09	TNFRSF9
ENSG00000049323	0.374833	4.34185	0.624499	0.191805	4.34185	0.807182	0.252517	4.34185	0.74622	-0.536198	4.34185	0.464941	LTBP1
ENSG00000049449	0.609677	5.57469	0.389977	0.67394	5.57469	0.327738	0.157665	5.57469	0.841255	0.538708	5.57469	0.460598	RCN1
ENSG00000049541	-0.423339	5.31955	0.580186	-0.251246	5.31955	0.749219	-0.00916313	5.31955	0.99168	-0.130068	5.31955	0.870811	RFC2
ENSG00000049618	-0.00239373	5.92571	0.998425	-0.206616	5.92571	0.79379	0.278225	5.92571	0.720672	-0.880366	5.92571	0.148206	ARID1B
ENSG00000049656	-0.16679	6.96212	0.833775	-0.20516	6.96212	0.795233	-0.431607	6.96212	0.569912	0.0206581	6.96212	0.978495	CLPTM1L
ENSG00000049759	1.0908	7.76229	0.0274547	0.905964	7.76229	0.120655	0.254736	7.76229	0.74399	1.05603	7.76229	0.0389138	NEDD4L
ENSG00000049769	-0.500529	0.889974	0.540204	-0.337886	0.889974	0.67954	0.0139172	0.889974	0.989416	2.51892	0.889974	3.33e-06	PPP1R3F
ENSG00000049860	0.388325	5.3502	0.611243	0.336647	5.3502	0.662503	0.0168348	5.3502	0.981443	0.446418	5.3502	0.554838	HEXB
ENSG00000049883	-0.0445628	3.32262	0.955991	0.0491535	3.32262	0.950251	0.0578142	3.32262	0.940907	-0.508822	3.32262	0.501297	PTCD2
ENSG00000050165	-0.056671	5.46489	0.943971	0.281724	5.46489	0.717299	0.590891	5.46489	0.408103	0.475868	5.46489	0.523476	DKK3
ENSG00000050327	-0.805653	4.21445	0.24468	-0.671693	4.21445	0.352112	-0.353247	4.21445	0.649359	-1.32406	4.21445	0.0349096	ARHGEF5
ENSG00000050344	0.570637	6.618	0.428128	1.44163	6.618	0.000152051	0.0262245	6.618	0.973199	0.208683	6.618	0.790311	NFE2L3
ENSG00000050393	0.024165	5.20165	0.975646	-0.107931	5.20165	0.89283	0.242968	5.20165	0.755866	0.469597	5.20165	0.530924	MCUR1
ENSG00000050405	0.541345	9.31801	0.457416	1.1108	9.31801	0.0229348	0.223291	9.31801	0.775365	1.66262	9.31801	1.73e-06	LIMA1
ENSG00000050426	0.0808845	4.5465	0.918501	0.245904	4.5465	0.753015	0.343254	4.5465	0.655977	0.136958	4.5465	0.862349	LETMD1
ENSG00000050748	-0.724484	3.74033	0.293354	-1.55021	3.74033	0.00354689	0.126641	3.74033	0.871954	-0.209945	3.74033	0.790198	MAPK9
ENSG00000050820	-0.0523162	5.56398	0.948505	0.0761515	5.56398	0.923468	-0.275488	5.56398	0.725097	-0.966606	5.56398	0.0946661	BCAR1
ENSG00000051009	0.200501	4.14686	0.798325	0.363307	4.14686	0.635676	-0.242325	4.14686	0.758024	-1.11728	4.14686	0.0538871	FAM160A2
ENSG00000051108	0.218284	5.76122	0.780505	0.875852	5.76122	0.148523	-0.0564273	5.76122	0.944374	0.206517	5.76122	0.792442	HERPUD1
ENSG00000051128	-0.78467	7.13602	0.237668	-0.777546	7.13602	0.243803	-0.229356	7.13602	0.772391	-0.511074	7.13602	0.491989	HOMER3
ENSG00000051180	-0.240156	5.72604	0.760331	-0.297934	5.72604	0.70274	-0.060987	5.72604	0.939926	-0.447026	5.72604	0.553953	RAD51
ENSG00000051341	0.284366	5.35835	0.714601	0.25814	5.35835	0.740791	-0.404282	5.35835	0.597305	-0.554886	5.35835	0.445606	POLQ
ENSG00000051382	-0.245402	3.9589	0.754839	-0.336866	3.9589	0.663177	0.124301	3.9589	0.874828	-1.99334	3.9589	2.88e-05	PIK3CB
ENSG00000051596	-0.844112	1.64323	0.268019	-1.24611	1.64323	0.10065	-0.138852	1.64323	0.862517	-0.487918	1.64323	0.542128	THOC3
ENSG00000051620	0.4251	7.15655	0.581182	0.397544	7.15655	0.607743	0.0423204	7.15655	0.958028	-0.425103	7.15655	0.581153	HEBP2
ENSG00000051825	0.0713561	5.33119	0.927817	-0.320612	5.33119	0.679959	-0.168313	5.33119	0.832177	0.078436	5.33119	0.920817	MPHOSPH9
ENSG00000052126	-0.635138	4.4183	0.368201	-0.428612	4.4183	0.571557	0.505409	4.4183	0.49355	-0.699414	4.4183	0.309972	PLEKHA5
ENSG00000052723	-0.236613	4.6165	0.764355	-0.452902	4.6165	0.549361	0.0111262	4.6165	0.987485	-0.240549	4.6165	0.760061	SIKE1
ENSG00000052749	0.696171	4.2924	0.308504	0.376702	4.2924	0.622762	-0.418454	4.2924	0.581724	-0.827123	4.2924	0.206457	RRP12
ENSG00000052795	0.230901	5.62566	0.76797	-0.0491375	5.62566	0.951767	0.0924559	5.62566	0.907738	0.534195	5.62566	0.464842	FNIP2
ENSG00000052802	1.00353	7.50167	0.0611439	0.805089	7.50167	0.203298	0.579819	7.50167	0.418748	0.0272089	7.50167	0.972208	MSMO1
ENSG00000052841	0.00904608	6.20602	0.990695	0.189418	6.20602	0.809442	-0.077054	6.20602	0.92465	-0.35979	6.20602	0.642268	TTC17
ENSG00000053254	-0.843536	7.09483	0.17101	-1.14712	7.09483	0.0163476	-0.301865	7.09483	0.698998	-1.55865	7.09483	2.17e-05	FOXN3
ENSG00000053371	-0.925818	6.72556	0.116058	-1.23463	6.72556	0.00963698	-0.599234	6.72556	0.402229	-0.766783	6.72556	0.243305	AKR7A2
ENSG00000053372	0.19649	6.6049	0.802273	0.237444	6.6049	0.761302	-0.231237	6.6049	0.769164	-0.899001	6.6049	0.129941	MRTO4
ENSG00000053501	0.195043	2.91023	0.804	0.109313	2.91023	0.890108	-0.0364567	2.91023	0.964414	-0.384085	2.91023	0.618341	USE1
ENSG00000053524	2.27503	2.0385	0.00748236	2.75422	2.0385	0.00084305	1.97274	2.0385	0.0199391	6.66063	2.0385	6.09e-16	MCF2L2
ENSG00000053747	-0.809804	3.28588	0.246485	0.723559	3.28588	0.299044	-0.366294	3.28588	0.633837	2.39449	3.28588	9.47e-08	LAMA3
ENSG00000053770	-0.0206671	4.62255	0.979987	-0.12806	4.62255	0.872274	0.45535	4.62255	0.543647	0.399995	4.62255	0.599258	AP5M1
ENSG00000053900	-0.0537697	4.7197	0.946894	-0.255373	4.7197	0.744973	-0.194613	4.7197	0.805877	-0.257608	4.7197	0.742573	ANAPC4
ENSG00000054116	-0.0408951	6.5956	0.960221	-0.0116314	6.5956	0.98921	-0.0604991	6.5956	0.941064	0.45259	6.5956	0.552924	TRAPPC3
ENSG00000054118	0.33525	7.9349	0.664142	0.229414	7.9349	0.769256	0.197757	7.9349	0.800941	-0.0894406	7.9349	0.912171	THRAP3
ENSG00000054148	0.134418	3.12564	0.86473	0.273103	3.12564	0.726566	0.374082	3.12564	0.62545	-0.0813373	3.12564	0.918018	PHPT1
ENSG00000054219	-0.0261291	2.51238	0.973074	0.612364	2.51238	0.401874	0.909267	2.51238	0.166169	-0.848964	2.51238	0.249397	LY75
ENSG00000054267	0.466589	8.04206	0.534522	0.54495	8.04206	0.453754	0.1373	8.04206	0.862477	0.620636	8.04206	0.378244	ARID4B
ENSG00000054282	0.2851	4.65593	0.71379	-0.0312186	4.65593	0.969377	0.0270624	4.65593	0.972549	0.144427	4.65593	0.854948	SDCCAG8
ENSG00000054523	-0.304723	6.5046	0.696076	-0.335508	6.5046	0.665494	-0.503562	6.5046	0.497029	0.216325	6.5046	0.782486	KIF1B
ENSG00000054598	1.92717	2.81582	0.000571538	2.93988	2.81582	1.67e-08	0.204771	2.81582	0.799114	4.50542	2.81582	1.25e-15	FOXC1
ENSG00000054611	-0.137734	5.1872	0.862818	-0.402754	5.1872	0.598914	-0.157252	5.1872	0.843301	-1.02905	5.1872	0.0656701	TBC1D22A
ENSG00000054654	0.479053	9.69455	0.520083	-0.0367027	9.69455	0.964569	-0.407591	9.69455	0.594096	-0.22978	9.69455	0.771252	SYNE2
ENSG00000054793	-0.688284	2.89296	0.329684	-0.85857	2.89296	0.200562	-0.522516	2.89296	0.480774	-0.813425	2.89296	0.237387	ATP9A
ENSG00000054965	-0.433729	3.86783	0.566667	-1.1989	3.86783	0.029053	-0.290508	3.86783	0.709942	-0.881532	3.86783	0.168443	FAM168A
ENSG00000054967	0.174221	3.14019	0.82481	0.214041	3.14019	0.785059	-0.122051	3.14019	0.877952	0.200827	3.14019	0.798854	RELT
ENSG00000054983	-0.521796	3.41053	0.481241	-0.984444	3.41053	0.121145	-0.032231	3.41053	0.96859	-0.204168	3.41053	0.795462	GALC
ENSG00000055044	0.478944	7.98701	0.521093	0.313671	7.98701	0.685454	0.201698	7.98701	0.796995	0.868502	7.98701	0.149269	NOP58
ENSG00000055070	0.12014	6.33399	0.87925	0.186324	6.33399	0.812513	-0.193357	6.33399	0.807055	-0.161701	6.33399	0.838755	SZRD1
ENSG00000055130	0.223688	5.44125	0.775208	0.176539	5.44125	0.822567	0.326152	5.44125	0.672919	0.521705	5.44125	0.477389	CUL1
ENSG00000055147	-0.181196	4.18609	0.819122	-0.162666	4.18609	0.837607	0.12723	4.18609	0.871783	-0.00542163	4.18609	0.995024	FAM114A2
ENSG00000055208	-0.203401	6.42957	0.796971	0.280428	6.42957	0.718531	0.0917092	6.42957	0.907476	1.08572	6.42957	0.0311483	TAB2
ENSG00000055211	-0.0780425	7.40541	0.92388	-0.13659	7.40541	0.865412	0.099291	7.40541	0.90201	-0.421488	7.40541	0.584751	GINM1
ENSG00000055332	0.478494	8.58307	0.521055	0.705272	8.58307	0.296293	-0.21439	8.58307	0.786077	-0.175239	8.58307	0.825304	EIF2AK2
ENSG00000055483	0.511823	6.12601	0.487169	0.544798	6.12601	0.454028	-0.245255	6.12601	0.755203	0.590669	6.12601	0.408287	USP36
ENSG00000055609	-0.0555794	6.65552	0.945525	0.000944124	6.65552	0.998418	-0.413921	6.65552	0.588675	-0.455033	6.65552	0.546647	KMT2C
ENSG00000055917	-0.0850699	6.1674	0.916635	-0.051884	6.1674	0.9494	-0.0429373	6.1674	0.958248	-0.454094	6.1674	0.549122	PUM2
ENSG00000055950	-0.375201	6.43422	0.628194	-0.431528	6.43422	0.573107	-0.0300234	6.43422	0.970971	-0.473336	6.43422	0.528885	MRPL43
ENSG00000056050	-0.618164	5.52268	0.382812	-0.866392	5.52268	0.158123	-0.173286	5.52268	0.827228	-0.398316	5.52268	0.6039	HPF1
ENSG00000056097	0.16243	7.0792	0.83691	0.269835	7.0792	0.729012	0.233776	7.0792	0.764919	0.715956	7.0792	0.285819	ZFR
ENSG00000056277	0.677441	2.44237	0.358509	0.471594	2.44237	0.541585	0.484195	2.44237	0.525473	0.417882	2.44237	0.596396	ZNF280C
ENSG00000056558	4.09276	5.33323	6e-18	5.62981	5.33323	6.2e-24	1.17878	5.33323	0.0370618	2.85577	5.33323	9.97e-11	TRAF1
ENSG00000056586	-0.0171523	6.76337	0.983722	-0.0729063	6.76337	0.928953	-0.352	6.76337	0.649836	-0.0289545	6.76337	0.971882	RC3H2
ENSG00000056972	1.17498	5.36381	0.0155591	1.30704	5.36381	0.00316795	1.01234	5.36381	0.0648372	0.485029	5.36381	0.514795	TRAF3IP2
ENSG00000057019	0.452081	7.45602	0.558128	0.831526	7.45602	0.179877	-0.580838	7.45602	0.41941	-1.25359	7.45602	0.00498232	DCBLD2
ENSG00000057252	0.256458	5.6305	0.742446	0.169857	5.6305	0.829251	0.308102	5.6305	0.690927	-0.640828	5.6305	0.361005	SOAT1
ENSG00000057294	-0.426678	5.03726	0.574078	-0.46183	5.03726	0.538774	-0.491586	5.03726	0.509003	-0.264832	5.03726	0.735572	PKP2
ENSG00000057608	0.262069	6.75656	0.736742	0.458438	6.75656	0.546653	0.0777083	6.75656	0.923401	-0.371724	6.75656	0.632052	GDI2
ENSG00000057663	-0.133002	4.63047	0.867412	0.351565	4.63047	0.64741	0.250569	4.63047	0.748109	1.15145	4.63047	0.0279636	ATG5
ENSG00000057704	-0.635443	2.02164	0.393841	-0.712741	2.02164	0.335602	0.132832	2.02164	0.866449	-0.628744	2.02164	0.40786	TMCC3
ENSG00000057757	-0.228288	5.77918	0.772181	-0.679608	5.77918	0.322902	-0.184557	5.77918	0.815918	-0.145181	5.77918	0.855313	PITHD1
ENSG00000057935	-0.53601	4.3635	0.466801	-0.790992	4.3635	0.236837	0.119508	4.3635	0.87906	-0.375134	4.3635	0.625627	MTA3
ENSG00000058056	-0.220846	5.06492	0.779628	-0.807618	5.06492	0.208616	0.0385661	5.06492	0.961602	-0.972407	5.06492	0.0955161	USP13
ENSG00000058063	-0.378849	4.71578	0.621904	-0.569722	4.71578	0.433291	-0.102653	4.71578	0.89826	-0.345329	4.71578	0.655124	ATP11B
ENSG00000058085	4.35312	4.21074	1.38e-20	5.78949	4.21074	2.38e-26	0.378834	4.21074	0.623486	4.00837	4.21074	1.92e-18	LAMC2
ENSG00000058091	-0.38804	5.10743	0.61286	-0.513702	5.10743	0.486689	0.196732	5.10743	0.802076	-1.35172	5.10743	0.00440123	CDK14
ENSG00000058262	0.103268	7.77714	0.896078	0.172283	7.77714	0.826561	-0.178612	7.77714	0.821871	-0.388073	7.77714	0.613751	SEC61A1
ENSG00000058272	0.206273	7.82946	0.792423	0.21531	7.82946	0.783379	0.0926338	7.82946	0.907776	-0.0727134	7.82946	0.92873	PPP1R12A
ENSG00000058453	-0.664288	3.45346	0.357069	-1.3719	3.45346	0.0244079	-0.131196	3.45346	0.870171	-1.6602	3.45346	0.00659476	CROCC
ENSG00000058600	0.366049	3.88283	0.633073	0.0520714	3.88283	0.947403	0.183347	3.88283	0.815444	-0.814086	3.88283	0.222064	POLR3E
ENSG00000058668	0.091818	6.3904	0.908442	-0.203492	6.3904	0.796907	-0.423293	6.3904	0.580029	-1.22145	6.3904	0.00890872	ATP2B4
ENSG00000058673	0.209981	6.38209	0.788724	0.288119	6.38209	0.710755	0.294066	6.38209	0.704785	0.302785	6.38209	0.696233	ZC3H11A
ENSG00000058729	-0.0235446	4.62213	0.977059	0.0208876	4.62213	0.978724	-0.0218796	4.62213	0.978848	1.39351	4.62213	0.00150293	RIOK2
ENSG00000058799	0.21475	4.68928	0.784132	0.201204	4.68928	0.797743	0.0998337	4.68928	0.899167	0.244011	4.68928	0.755051	YIPF1
ENSG00000058804	-0.56543	5.77306	0.434984	-0.757033	5.77306	0.250109	-0.0898692	5.77306	0.911347	-0.511618	5.77306	0.488842	NDC1
ENSG00000059122	-0.91855	3.25449	0.151558	-1.39193	3.25449	0.0120204	-0.234051	3.25449	0.766219	-0.303885	3.25449	0.695714	FLYWCH1
ENSG00000059145	-0.62058	3.68194	0.384254	-0.532191	3.68194	0.469365	-0.267888	3.68194	0.732402	-0.926508	3.68194	0.146171	UNKL
ENSG00000059377	-1.14819	1.81154	0.113539	0.11262	1.81154	0.888833	-0.600089	1.81154	0.428285	1.28656	1.81154	0.04208	TBXAS1
ENSG00000059378	0.582858	6.77499	0.41586	1.11844	6.77499	0.0217139	-0.369284	6.77499	0.633502	0.854009	6.77499	0.162642	PARP12
ENSG00000059573	-0.273113	3.35309	0.727587	-0.844092	3.35309	0.215396	-0.299361	3.35309	0.701615	-0.211518	3.35309	0.788642	ALDH18A1
ENSG00000059588	-0.504907	2.88349	0.498307	-0.625657	2.88349	0.38674	-0.00911698	2.88349	0.991796	-0.388709	2.88349	0.611882	TARBP1
ENSG00000059691	0.11154	4.5544	0.887574	-0.202337	4.5544	0.797979	-0.110668	4.5544	0.889933	-0.0479716	4.5544	0.95248	GATB
ENSG00000059728	0.708855	5.69366	0.294052	1.5519	5.69366	3.52e-05	-0.127479	5.69366	0.872803	2.97935	5.69366	8.03e-18	MXD1
ENSG00000059758	0.579975	5.37889	0.419417	1.25666	5.37889	0.00662813	0.380268	5.37889	0.618894	0.111811	5.37889	0.887511	CDK17
ENSG00000059769	0.388881	4.63606	0.610872	0.339639	4.63606	0.659734	0.0721282	4.63606	0.927366	0.605564	4.63606	0.395103	DNAJC25
ENSG00000059804	0.460995	5.17795	0.538155	-0.116533	5.17795	0.883919	0.494276	5.17795	0.504844	-0.201513	5.17795	0.798587	SLC2A3
ENSG00000059915	2.27698	2.16325	0.0044696	3.45623	2.16325	4.41e-06	1.35011	2.16325	0.11782	5.31162	2.16325	9.15e-12	PSD
ENSG00000060069	0.21633	3.59354	0.782469	0.264438	3.59354	0.734479	0.438238	3.59354	0.56082	-0.276373	3.59354	0.722946	CTDP1
ENSG00000060138	0.260315	9.18567	0.738409	0.298637	9.18567	0.700325	0.203634	9.18567	0.795034	0.278057	9.18567	0.720768	YBX3
ENSG00000060237	-0.015527	7.79899	0.985412	-0.00720718	7.79899	0.993714	-0.351799	7.79899	0.64996	0.522963	7.79899	0.475955	WNK1
ENSG00000060339	0.369649	8.35358	0.631077	0.217814	8.35358	0.780861	0.19308	8.35358	0.805631	0.558984	8.35358	0.439668	CCAR1
ENSG00000060491	0.70118	6.76907	0.310707	1.25895	6.76907	0.0171943	-0.0610723	6.76907	0.940713	0.648143	6.76907	0.359395	OGFR
ENSG00000060642	1.09959	2.50416	0.0902968	1.5219	2.50416	0.0081374	0.612994	2.50416	0.404729	2.27226	2.50416	2.64e-06	PIGV
ENSG00000060656	-1.36129	3.06536	0.0398355	-1.65369	3.06536	0.012423	0.635864	3.06536	0.38274	-1.11716	3.06536	0.11473	PTPRU
ENSG00000060688	-0.00162138	3.54791	0.998886	-0.00319994	3.54791	0.997183	-0.0472021	3.54791	0.953428	0.43363	3.54791	0.565919	SNRNP40
ENSG00000060749	-0.313137	6.02312	0.687646	-0.454921	6.02312	0.547368	-0.136459	6.02312	0.864524	0.444975	6.02312	0.55714	QSER1
ENSG00000060762	-0.102524	3.82118	0.898192	0.136727	3.82118	0.862601	0.139465	3.82118	0.859131	0.552364	3.82118	0.45787	MPC1
ENSG00000060982	0.518097	6.2634	0.480857	0.0131009	6.2634	0.986073	-0.112785	6.2634	0.888019	-1.14771	6.2634	0.0217725	BCAT1
ENSG00000061273	0.691303	9.74795	0.330648	0.382968	9.74795	0.616737	0.374421	9.74795	0.625068	-1.46006	9.74795	0.0101291	HDAC7
ENSG00000061676	0.0590076	5.89808	0.940002	0.0951346	5.89808	0.903843	0.143985	5.89808	0.854822	0.0169836	5.89808	0.98217	NCKAP1
ENSG00000061794	0.16211	5.51249	0.836857	0.0462347	5.51249	0.9531	0.12194	5.51249	0.877199	0.107628	5.51249	0.891657	MRPS35
ENSG00000061936	0.164003	6.79424	0.835611	0.118265	6.79424	0.882226	-0.21829	6.79424	0.782082	-0.206235	6.79424	0.794145	SFSWAP
ENSG00000061938	0.126915	4.30094	0.872246	0.737407	4.30094	0.272091	-0.1184	4.30094	0.881959	-0.192861	4.30094	0.806708	TNK2
ENSG00000061987	-0.163575	4.58904	0.836908	-0.241883	4.58904	0.758497	-0.498068	4.58904	0.502389	-0.268372	4.58904	0.731856	MON2
ENSG00000062194	0.425531	7.92034	0.582109	0.932619	7.92034	0.102135	0.0696002	7.92034	0.931372	2.23576	7.92034	2.65e-16	GPBP1
ENSG00000062282	-0.161542	1.98278	0.844614	-0.445387	1.98278	0.599838	1.61658	1.98278	0.0141976	2.34585	1.98278	0.00019605	DGAT2
ENSG00000062370	-0.78432	1.76309	0.287913	-0.611794	1.76309	0.42053	0.161607	1.76309	0.837719	-0.285873	1.76309	0.716195	ZNF112
ENSG00000062485	0.218815	5.93374	0.780007	-0.049592	5.93374	0.951245	0.190362	5.93374	0.808441	0.199624	5.93374	0.799308	CS
ENSG00000062582	0.25085	2.26179	0.753202	0.935294	2.26179	0.18252	-0.135623	2.26179	0.864727	1.96914	2.26179	0.000507354	MRPS24
ENSG00000062598	0.142206	4.89681	0.856781	0.406392	4.89681	0.592847	-0.204599	4.89681	0.795817	0.536399	4.89681	0.462933	ELMO2
ENSG00000062650	0.328102	7.26747	0.671161	0.263397	7.26747	0.735417	0.165169	7.26747	0.834172	1.17668	7.26747	0.0104776	WAPL
ENSG00000062716	1.01866	7.54331	0.0538985	1.24894	7.54331	0.00381186	0.313683	7.54331	0.685438	0.0985785	7.54331	0.901507	VMP1
ENSG00000062725	-0.192258	5.60022	0.808137	-0.0651814	5.60022	0.935859	-0.19318	5.60022	0.807247	0.766708	5.60022	0.23997	APPBP2
ENSG00000062822	-0.648745	1.71188	0.406805	-0.103545	1.71188	0.896286	-0.567997	1.71188	0.464466	-0.182147	1.71188	0.82036	POLD1
ENSG00000063046	0.148975	5.74747	0.850249	-0.179132	5.74747	0.821284	0.166696	5.74747	0.832313	0.626674	5.74747	0.372871	EIF4B
ENSG00000063169	0.0819573	2.40836	0.917814	0.25777	2.40836	0.743228	0.428256	2.40836	0.574576	-0.380866	2.40836	0.626344	BICRA
ENSG00000063177	-0.191729	9.73288	0.808868	-0.0532645	9.73288	0.947904	0.102348	9.73288	0.897149	0.50598	9.73288	0.493163	RPL18
ENSG00000063180	-0.573018	1.79372	0.474415	-0.353069	1.79372	0.663565	0.19258	1.79372	0.811388	-0.195284	1.79372	0.810762	CA11
ENSG00000063241	-0.141415	3.78983	0.860525	0.0928958	3.78983	0.905924	-0.613021	3.78983	0.409663	-0.496456	3.78983	0.518381	ISOC2
ENSG00000063244	0.205866	4.96925	0.79304	0.333971	4.96925	0.665174	-0.866986	4.96925	0.162012	0.703461	4.96925	0.300135	U2AF2
ENSG00000063245	-0.258268	5.32874	0.742275	-0.351935	5.32874	0.648901	-0.319429	5.32874	0.681346	-0.368963	5.32874	0.631826	EPN1
ENSG00000063322	-0.2445	5.63396	0.755978	-0.578838	5.63396	0.421684	-0.180507	5.63396	0.819962	0.491854	5.63396	0.507549	MED29
ENSG00000063438	1.06208	3.44012	0.0661992	1.13036	3.44012	0.0434716	-0.278425	3.44012	0.721061	-0.888758	3.44012	0.187135	AHRR
ENSG00000063601	-0.142409	3.61146	0.857748	-0.0398437	3.61146	0.960543	-0.375506	3.61146	0.624448	-1.04931	3.61146	0.0905481	MTMR1
ENSG00000063660	-0.0372921	2.56698	0.963278	-0.437562	2.56698	0.565467	-1.09084	2.56698	0.0842187	-1.09515	2.56698	0.0999367	GPC1
ENSG00000063854	-0.580105	5.74095	0.420382	-1.02613	5.74095	0.0594468	-0.0615794	5.74095	0.939321	-0.21451	5.74095	0.785918	HAGH
ENSG00000063978	0.441144	4.13621	0.558542	0.233376	4.13621	0.76557	0.546844	4.13621	0.454459	0.561445	4.13621	0.442141	RNF4
ENSG00000064012	0.788815	5.75133	0.219978	1.23447	5.75133	0.00670101	0.150516	5.75133	0.848556	0.611251	5.75133	0.388364	CASP8
ENSG00000064042	-0.351692	4.82794	0.648612	-0.259722	4.82794	0.740416	0.0479047	4.82794	0.951656	0.423109	4.82794	0.57681	LIMCH1
ENSG00000064102	-0.0571539	5.10983	0.943483	-0.317107	5.10983	0.683301	-0.129858	5.10983	0.870675	0.00855795	5.10983	0.990913	INTS13
ENSG00000064115	-0.960638	6.27692	0.0941144	-1.25552	6.27692	0.00779054	-0.247303	6.27692	0.753409	-0.185328	6.27692	0.815337	TM7SF3
ENSG00000064199	0.392891	2.87508	0.606448	0.212338	2.87508	0.786778	0.0801894	2.87508	0.918845	-0.127139	2.87508	0.871371	SPA17
ENSG00000064205	-1.42271	2.95834	0.0482726	-1.96015	2.95834	0.00740865	-0.486177	2.95834	0.537244	-0.535454	2.95834	0.501086	CCN5
ENSG00000064225	0.433052	5.24813	0.568229	0.305022	5.24813	0.694025	0.382005	5.24813	0.618997	-0.434239	5.24813	0.566686	ST3GAL6
ENSG00000064313	0.228582	6.01649	0.770247	0.102893	6.01649	0.89684	0.116573	6.01649	0.883101	0.55068	6.01649	0.448252	TAF2
ENSG00000064393	-0.00977666	6.63878	0.991101	0.265555	6.63878	0.733269	-0.449151	6.63878	0.55248	-1.07139	6.63878	0.0384305	HIPK2
ENSG00000064419	-0.00834284	6.64685	0.992533	-0.035702	6.64685	0.965239	-0.166259	6.64685	0.834232	-0.948597	6.64685	0.0964787	TNPO3
ENSG00000064545	-0.56856	5.60432	0.44229	-1.20163	5.60432	0.0471954	0.0188333	5.60432	0.978755	-0.705966	5.60432	0.321556	TMEM161A
ENSG00000064607	-0.447716	5.96293	0.553665	-0.698064	5.96293	0.304962	-0.342002	5.96293	0.659093	-0.312817	5.96293	0.687955	SUGP2
ENSG00000064651	2.74131	7.05037	1.56e-14	2.41578	7.05037	4.02e-12	0.232769	7.05037	0.765944	-0.447955	7.05037	0.552585	SLC12A2
ENSG00000064652	-1.02503	3.99891	0.0815943	-0.79166	3.99891	0.231429	-0.204745	3.99891	0.795746	-0.883389	3.99891	0.167274	SNX24
ENSG00000064666	-0.915326	3.05095	0.206212	-0.979061	3.05095	0.176058	-0.543105	3.05095	0.477766	-0.521411	3.05095	0.503401	CNN2
ENSG00000064687	-0.723276	3.08345	0.308471	-1.48285	3.08345	0.0147976	0.0706051	3.08345	0.927962	-0.682325	3.08345	0.347275	ABCA7
ENSG00000064703	0.0549478	5.08815	0.944528	0.197052	5.08815	0.801909	0.165642	5.08815	0.833319	0.961884	5.08815	0.0939983	DDX20
ENSG00000064726	0.0320152	3.77154	0.967126	0.021492	3.77154	0.977838	-0.0771836	3.77154	0.923756	0.759077	3.77154	0.270431	BTBD1
ENSG00000064763	-0.276613	3.56809	0.724044	0.224809	3.56809	0.774197	0.0659701	3.56809	0.932619	-0.279366	3.56809	0.721028	FAR2
ENSG00000064932	0.842013	6.13744	0.173378	1.0947	6.13744	0.0297888	0.995072	6.13744	0.0684291	-0.975296	6.13744	0.090728	SBNO2
ENSG00000064933	0.0183553	5.5024	0.980914	-0.211772	5.5024	0.78862	0.0696301	5.5024	0.929613	-0.0137875	5.5024	0.986881	PMS1
ENSG00000064961	-0.220875	6.1454	0.779549	-0.213414	6.1454	0.787002	0.0253207	6.1454	0.974417	0.119046	6.1454	0.880943	HMG20B
ENSG00000064989	1.4776	4.48448	0.00456592	0.788497	4.48448	0.24858	1.78436	4.48448	0.000183498	0.156896	4.48448	0.843694	CALCRL
ENSG00000064995	-0.246531	6.00702	0.753978	-0.466347	6.00702	0.534654	-0.313367	6.00702	0.687514	-1.57595	6.00702	7.67e-05	TAF11
ENSG00000064999	-0.0770024	4.01101	0.923442	0.106762	4.01101	0.892462	0.0854274	4.01101	0.913685	-1.33892	4.01101	0.0143212	ANKS1A
ENSG00000065000	0.246282	7.4011	0.752427	0.181501	7.4011	0.817464	-0.097795	7.4011	0.903775	-0.596397	7.4011	0.404011	AP3D1
ENSG00000065029	-0.319883	3.12265	0.682095	-0.249993	3.12265	0.751152	0.0458614	3.12265	0.952771	-0.545601	3.12265	0.46916	ZNF76
ENSG00000065054	0.561933	5.5703	0.440185	0.551928	5.5703	0.449973	-0.438453	5.5703	0.56387	-0.53902	5.5703	0.466121	SLC9A3R2
ENSG00000065057	-1.59944	4.72622	0.0052404	-1.89709	4.72622	0.000784777	-0.387646	4.72622	0.616964	-1.09665	4.72622	0.0889007	NTHL1
ENSG00000065060	0.616832	4.92807	0.383573	1.26996	4.92807	0.00669039	0.142495	4.92807	0.856466	0.141376	4.92807	0.858052	UHRF1BP1
ENSG00000065135	0.165604	6.70167	0.835615	0.452123	6.70167	0.555134	-0.180422	6.70167	0.820408	-0.089887	6.70167	0.912354	GNAI3
ENSG00000065150	0.0608659	6.70699	0.93965	-0.0523572	6.70699	0.94897	0.0186776	6.70699	0.981175	0.570599	6.70699	0.428105	IPO5
ENSG00000065154	-0.518503	4.60236	0.492206	-0.676337	4.60236	0.35293	0.0561036	4.60236	0.9418	0.358986	4.60236	0.642154	OAT
ENSG00000065183	0.316951	5.15236	0.682084	0.0832948	5.15236	0.917094	-0.163596	5.15236	0.836882	-0.323318	5.15236	0.676993	WDR3
ENSG00000065243	-0.0146581	7.1303	0.986228	0.102339	7.1303	0.898307	-0.0931379	7.1303	0.908577	-0.126127	7.1303	0.875233	PKN2
ENSG00000065268	-0.707114	5.91095	0.305028	-0.687377	5.91095	0.323149	-0.684497	5.91095	0.325227	-0.959984	5.91095	0.116617	WDR18
ENSG00000065308	0.121933	7.38818	0.877486	0.0349716	7.38818	0.96446	-0.217516	7.38818	0.782872	-1.16296	7.38818	0.0143689	TRAM2
ENSG00000065328	-0.176503	5.61739	0.823973	-0.591241	5.61739	0.409392	-0.259308	5.61739	0.741257	-0.152812	5.61739	0.847763	MCM10
ENSG00000065357	-0.00546841	5.20929	0.995641	-0.270195	5.20929	0.730634	0.266356	5.20929	0.732265	-0.545913	5.20929	0.456491	DGKA
ENSG00000065413	-0.795997	2.75911	0.256086	-0.709089	2.75911	0.324307	-0.135385	2.75911	0.86513	-0.395854	2.75911	0.607183	ANKRD44
ENSG00000065427	0.310228	7.65248	0.688867	0.643348	7.65248	0.355871	-0.283203	7.65248	0.717496	-0.282647	7.65248	0.718042	KARS1
ENSG00000065457	0.231884	5.25962	0.766987	0.104561	5.25962	0.895364	-0.0596291	5.25962	0.941351	0.00751732	5.25962	0.992123	ADAT1
ENSG00000065485	0.463239	4.89411	0.536485	0.791115	4.89411	0.221436	0.521319	4.89411	0.477567	0.0154512	4.89411	0.984363	PDIA5
ENSG00000065491	-0.0960841	3.703	0.90422	-0.114336	3.703	0.885783	-0.212426	3.703	0.787799	0.361678	3.703	0.637453	TBC1D22B
ENSG00000065518	-0.164238	6.67283	0.83624	-0.264284	6.67283	0.736239	0.348131	6.67283	0.652006	0.157505	6.67283	0.842017	NDUFB4
ENSG00000065526	0.00685243	7.21162	0.992386	-0.0103795	7.21162	0.990522	-0.485262	7.21162	0.51571	-0.168294	7.21162	0.832192	SPEN
ENSG00000065534	1.34936	7.84047	0.00140734	1.79968	7.84047	5.13e-07	0.41599	7.84047	0.58353	-0.92558	7.84047	0.115404	MYLK
ENSG00000065548	0.241977	8.66846	0.756689	0.163579	8.66846	0.835507	-0.217563	8.66846	0.782915	0.433891	8.66846	0.567262	ZC3H15
ENSG00000065559	-0.0575832	4.10249	0.942998	-0.2006	4.10249	0.799568	0.081047	4.10249	0.918435	-0.413374	4.10249	0.58647	MAP2K4
ENSG00000065600	-0.199345	3.09484	0.800402	-0.137841	3.09484	0.861782	0.670365	3.09484	0.343131	0.242023	3.09484	0.758328	PACC1
ENSG00000065613	0.58083	8.41471	0.417743	0.468702	8.41471	0.532691	0.00420568	8.41471	0.995229	-0.272011	8.41471	0.728667	SLK
ENSG00000065615	0.209884	3.93011	0.789021	0.335252	3.93011	0.66369	0.248832	3.93011	0.749868	0.199388	3.93011	0.799862	CYB5R4
ENSG00000065618	2.24072	2.16515	0.000710624	3.54111	2.16515	1.62e-08	0.891803	2.16515	0.257783	3.58555	2.16515	1.9e-08	COL17A1
ENSG00000065621	-0.475561	2.36229	0.538865	0.327034	2.36229	0.677563	0.339414	2.36229	0.661632	3.48424	2.36229	7.64e-12	GSTO2
ENSG00000065717	-1.36704	3.25772	0.0193859	-1.99031	3.25772	0.000448041	0.884675	3.25772	0.167454	-0.63278	3.25772	0.383605	TLE2
ENSG00000065802	-0.646264	5.17399	0.363315	-0.598053	5.17399	0.408646	-0.717208	5.17399	0.298785	1.80083	5.17399	3.51e-05	ASB1
ENSG00000065809	0.455908	7.14003	0.554586	0.669661	7.14003	0.333647	-0.161569	7.14003	0.842177	-0.0610944	7.14003	0.940117	FAM107B
ENSG00000065833	0.0477467	3.80513	0.951675	0.111265	3.80513	0.888075	0.250253	3.80513	0.748322	-0.19428	3.80513	0.80478	ME1
ENSG00000065882	-0.237686	6.20993	0.762743	0.267114	6.20993	0.731789	-0.0502747	6.20993	0.950905	-0.116326	6.20993	0.88471	TBC1D1
ENSG00000065883	0.185894	5.28287	0.813027	0.299904	5.28287	0.699141	0.127044	5.28287	0.872336	0.642819	5.28287	0.357684	CDK13
ENSG00000065911	-0.473816	6.31676	0.527047	0.0599919	6.31676	0.939203	0.0534554	6.31676	0.945715	-0.0868622	6.31676	0.913877	MTHFD2
ENSG00000065923	-0.509224	3.49497	0.492059	-0.374025	3.49497	0.625966	-0.256894	3.49497	0.74341	-1.21219	3.49497	0.0374347	SLC9A7
ENSG00000065970	-0.568996	5.06612	0.432131	-0.72934	5.06612	0.279051	-0.180242	5.06612	0.820334	0.34981	5.06612	0.649341	FOXJ2
ENSG00000065978	0.371134	9.28897	0.629624	0.408928	9.28897	0.592643	-0.00610775	9.28897	0.994894	0.529841	9.28897	0.469013	YBX1
ENSG00000065989	-1.30572	3.81902	0.0124332	-1.78442	3.81902	0.000197775	-0.395238	3.81902	0.605372	-0.479506	3.81902	0.521506	PDE4A
ENSG00000066027	-0.422795	4.7684	0.578397	-0.890993	4.7684	0.147631	-0.104536	4.7684	0.89618	-0.477619	4.7684	0.522643	PPP2R5A
ENSG00000066044	-0.258949	6.18184	0.741573	-0.0230787	6.18184	0.977811	0.231185	6.18184	0.767561	-0.394949	6.18184	0.606185	ELAVL1
ENSG00000066056	0.277815	5.59069	0.721048	0.339927	5.59069	0.659212	0.617087	5.59069	0.382581	0.526516	5.59069	0.472711	TIE1
ENSG00000066084	0.663469	4.87561	0.338162	1.0811	4.87561	0.041471	-0.0281689	4.87561	0.972471	-0.014892	4.87561	0.985369	DIP2B
ENSG00000066117	0.0763627	4.93823	0.923244	0.315495	4.93823	0.683646	-0.0147511	4.93823	0.98606	-0.919323	4.93823	0.131008	SMARCD1
ENSG00000066135	0.0351548	4.73294	0.964333	0.0824877	4.73294	0.916985	-0.193056	4.73294	0.80741	-1.11104	4.73294	0.0452971	KDM4A
ENSG00000066136	0.219423	3.41852	0.779429	0.0656253	3.41852	0.933902	-0.0550146	3.41852	0.945444	0.405651	3.41852	0.593994	NFYC
ENSG00000066279	-0.0422314	8.29513	0.958844	-0.346036	8.29513	0.65536	0.140209	8.29513	0.858834	-1.24758	8.29513	0.00487281	ASPM
ENSG00000066322	-0.0132054	7.10541	0.988242	0.0121663	7.10541	0.986377	-0.619661	7.10541	0.384434	-0.171023	7.10541	0.830254	ELOVL1
ENSG00000066379	-0.0500988	4.0946	0.950533	-0.331272	4.0946	0.6688	0.213937	4.0946	0.784743	0.298859	4.0946	0.700188	POLR1H
ENSG00000066422	0.176935	5.51339	0.821966	-0.0624025	5.51339	0.938289	-0.415003	5.51339	0.586115	0.672307	5.51339	0.328671	ZBTB11
ENSG00000066427	0.120386	6.06563	0.879944	-0.0309902	6.06563	0.969906	-0.0614451	6.06563	0.939857	0.370744	6.06563	0.630612	ATXN3
ENSG00000066455	-0.00757566	5.14549	0.993127	0.0538381	5.14549	0.945456	-0.0956724	5.14549	0.90493	0.847957	5.14549	0.17257	GOLGA5
ENSG00000066557	-0.453762	4.71863	0.546726	-0.391318	4.71863	0.609234	-0.17867	4.71863	0.821888	-0.304931	4.71863	0.695393	LRRC40
ENSG00000066583	-0.243676	3.00418	0.756521	-0.07163	3.00418	0.928392	-0.131888	3.00418	0.868584	-0.0707104	3.00418	0.928499	ISOC1
ENSG00000066629	0.741026	3.34994	0.274335	0.693164	3.34994	0.317032	0.241726	3.34994	0.756846	-0.772035	3.34994	0.264518	EML1
ENSG00000066651	0.251142	3.85182	0.747684	0.165481	3.85182	0.833607	-0.248563	3.85182	0.751454	-0.551386	3.85182	0.451523	TRMT11
ENSG00000066654	0.128611	5.70309	0.872113	-0.108518	5.70309	0.893049	-0.0531278	5.70309	0.948173	-0.4607	5.70309	0.541719	THUMPD1
ENSG00000066697	0.273488	5.65142	0.725485	0.726858	5.65142	0.276664	0.0176198	5.65142	0.982223	1.36851	5.65142	0.000987496	MSANTD3
ENSG00000066739	-0.469836	4.14973	0.530524	-0.612474	4.14973	0.390599	-0.145756	4.14973	0.854829	-0.449786	4.14973	0.550374	ATG2B
ENSG00000066777	0.132736	5.96871	0.866759	0.208065	5.96871	0.790792	0.162622	5.96871	0.836496	-0.617737	5.96871	0.38326	ARFGEF1
ENSG00000066827	0.062659	2.92123	0.936643	-0.194425	2.92123	0.805042	-0.164687	2.92123	0.835399	-0.938781	2.92123	0.163791	ZFAT
ENSG00000066855	0.0574112	3.7534	0.941681	-0.117013	3.7534	0.883256	0.109674	3.7534	0.889082	-0.405998	3.7534	0.59427	MTFR1
ENSG00000066926	-0.883336	3.32868	0.172374	-0.610095	3.32868	0.396232	-0.337028	3.32868	0.663188	-0.870551	3.32868	0.187683	FECH
ENSG00000066933	-0.227559	5.52442	0.772925	-0.443823	5.52442	0.557505	-0.768546	5.52442	0.239453	-1.48584	5.52442	0.000456897	MYO9A
ENSG00000067057	-0.60837	7.03976	0.392816	-0.428398	7.03976	0.573044	-0.475778	7.03976	0.525408	-0.631817	7.03976	0.369926	PFKP
ENSG00000067064	1.18137	6.06003	0.0461461	0.791464	6.06003	0.24914	0.384339	6.06003	0.615737	0.255517	6.06003	0.74376	IDI1
ENSG00000067066	0.964781	8.81231	0.0839618	1.33136	8.81231	0.00145865	0.0453117	8.81231	0.953761	1.07293	8.81231	0.0351458	SP100
ENSG00000067082	0.238856	9.06777	0.759813	1.19264	9.06777	0.00858714	-0.51895	9.06777	0.481725	0.912314	9.06777	0.116559	KLF6
ENSG00000067167	-0.374233	7.51728	0.627246	-0.19507	7.51728	0.805571	0.236403	7.51728	0.762175	0.0268879	7.51728	0.972128	TRAM1
ENSG00000067177	-0.902143	2.28535	0.198883	-0.738792	2.28535	0.310144	0.157915	2.28535	0.840712	1.40864	2.28535	0.012105	PHKA1
ENSG00000067182	-0.350383	7.51837	0.651087	-0.435727	7.51837	0.566269	0.12584	7.51837	0.873538	-2.27802	7.51837	8.89e-11	TNFRSF1A
ENSG00000067191	0.636325	2.07289	0.388043	0.719337	2.07289	0.320989	0.383824	2.07289	0.618867	-0.551356	2.07289	0.481714	CACNB1
ENSG00000067208	-0.0949747	5.52081	0.905745	-0.154653	5.52081	0.845805	-0.0108896	5.52081	0.989949	-1.03842	5.52081	0.0600515	EVI5
ENSG00000067221	0.531825	4.98143	0.467324	1.30579	4.98143	0.00447978	-0.15957	4.98143	0.840504	2.25138	4.98143	6.14e-11	STOML1
ENSG00000067225	0.458769	9.81938	0.540222	0.519417	9.81938	0.479995	0.0523921	9.81938	0.945947	-0.0346572	9.81938	0.966942	PKM
ENSG00000067248	-0.00447701	5.99737	0.996332	-0.0928239	5.99737	0.907951	0.105717	5.99737	0.893749	0.181588	5.99737	0.817363	DHX29
ENSG00000067334	0.511602	7.37904	0.487414	0.549975	7.37904	0.448717	0.287365	7.37904	0.711544	0.96551	7.37904	0.0818152	DNTTIP2
ENSG00000067365	-0.138974	2.70208	0.860827	-0.296592	2.70208	0.703268	0.0382649	2.70208	0.960709	0.383118	2.70208	0.618097	METTL22
ENSG00000067369	0.454089	5.93592	0.546508	0.611306	5.93592	0.387852	-0.199543	5.93592	0.800848	0.199277	5.93592	0.7997	TP53BP1
ENSG00000067533	0.455042	6.91137	0.545379	0.364363	6.91137	0.635759	-0.00170522	6.91137	0.999163	0.591498	6.91137	0.407229	RRP15
ENSG00000067560	-0.0797602	9.40216	0.921376	0.0300678	9.40216	0.969145	-0.257042	9.40216	0.743633	0.224863	9.40216	0.773796	RHOA
ENSG00000067596	0.310639	5.29596	0.688401	0.244691	5.29596	0.75425	0.119213	5.29596	0.880284	-0.140652	5.29596	0.859653	DHX8
ENSG00000067704	-0.16068	5.49735	0.839762	0.0550205	5.49735	0.94504	-0.10777	5.49735	0.893304	-0.183816	5.49735	0.816511	IARS2
ENSG00000067715	0.180333	1.66156	0.833238	0.571308	1.66156	0.483592	-0.432893	1.66156	0.598754	4.74902	1.66156	1.05e-14	SYT1
ENSG00000067798	3.4302	3.75489	4.52e-11	4.3693	3.75489	2.67e-15	0.40717	3.75489	0.60234	3.3941	3.75489	1.59e-10	NAV3
ENSG00000067829	0.109409	3.55693	0.889707	0.0229473	3.55693	0.976618	0.322794	3.55693	0.675733	-0.0245709	3.55693	0.97528	IDH3G
ENSG00000067836	-1.21199	3.16979	0.0382752	-1.4843	3.16979	0.00767434	-0.435089	3.16979	0.566334	-0.863074	3.16979	0.197489	ROGDI
ENSG00000067900	0.167916	8.50388	0.831414	0.183488	8.50388	0.815391	-0.00803447	8.50388	0.992936	0.145388	8.50388	0.854459	ROCK1
ENSG00000067955	0.0936109	6.03602	0.907714	-0.108923	6.03602	0.893215	0.0611662	6.03602	0.939598	-0.112593	6.03602	0.889386	CBFB
ENSG00000068001	-0.152057	5.58687	0.848934	-0.318311	5.58687	0.682674	0.875723	5.58687	0.160591	0.58433	5.58687	0.417319	HYAL2
ENSG00000068024	-0.479477	3.03866	0.522371	-0.71673	3.03866	0.30707	-0.0772796	3.03866	0.923311	-0.927945	3.03866	0.165523	HDAC4
ENSG00000068028	-0.410553	6.63573	0.595637	-0.400538	6.63573	0.605442	-0.470079	6.63573	0.537991	0.495649	6.63573	0.508776	RASSF1
ENSG00000068079	1.70418	7.08304	0.000532712	2.13264	7.08304	4.28e-06	-0.12135	7.08304	0.880869	-1.26277	7.08304	0.0388697	IFI35
ENSG00000068097	-0.11018	4.46655	0.890472	-0.0840833	4.46655	0.916647	-0.476178	4.46655	0.5243	-1.42425	4.46655	0.00391078	HEATR6
ENSG00000068120	-0.16245	4.67865	0.83791	0.190649	4.67865	0.808304	0.181811	4.67865	0.817033	0.281402	4.67865	0.717665	COASY
ENSG00000068137	-0.632084	4.87974	0.36989	-0.960324	4.87974	0.101869	0.644438	4.87974	0.355786	-0.907383	4.87974	0.137394	PLEKHH3
ENSG00000068305	0.214552	6.50873	0.784219	0.168156	6.50873	0.832093	-0.210496	6.50873	0.78988	0.492819	6.50873	0.507757	MEF2A
ENSG00000068308	-0.275649	6.65037	0.725359	-0.101595	6.65037	0.89943	-0.394292	6.65037	0.607113	-0.303371	6.65037	0.697692	OTUD5
ENSG00000068323	0.0229146	6.30521	0.975716	-0.0254013	6.30521	0.975892	0.0129255	6.30521	0.985682	0.747414	6.30521	0.263843	TFE3
ENSG00000068354	-0.5154	3.92039	0.485469	-0.282708	3.92039	0.717455	-0.288319	3.92039	0.71207	-1.42474	3.92039	0.00652315	TBC1D25
ENSG00000068366	0.708403	7.05639	0.292965	0.890895	7.05639	0.132235	0.579969	7.05639	0.418609	-0.0404043	7.05639	0.960546	ACSL4
ENSG00000068394	0.0793421	4.92684	0.920157	0.159004	4.92684	0.840097	0.0583029	4.92684	0.941199	-0.583122	4.92684	0.41807	GPKOW
ENSG00000068400	0.326977	7.35547	0.671378	0.647609	7.35547	0.358753	-0.119923	7.35547	0.882021	-0.568112	7.35547	0.437663	GRIPAP1
ENSG00000068438	0.291619	4.09848	0.70724	0.236287	4.09848	0.762653	0.670333	4.09848	0.333056	-0.229773	4.09848	0.769701	FTSJ1
ENSG00000068489	0.0517868	7.56303	0.948395	0.0833957	7.56303	0.917065	-0.192138	7.56303	0.808292	-1.42132	7.56303	0.000310039	PRR11
ENSG00000068650	0.0562406	5.26104	0.943369	-0.344384	5.26104	0.656389	-0.198478	5.26104	0.802017	-1.25071	5.26104	0.0106219	ATP11A
ENSG00000068654	0.0958621	4.76309	0.903434	0.0697443	4.76309	0.929627	-0.264527	4.76309	0.736003	-1.53841	4.76309	0.000815586	POLR1A
ENSG00000068697	-0.153122	10.5439	0.847639	0.0891094	10.5439	0.910494	0.0505402	10.5439	0.948983	0.112003	10.5439	0.88752	LAPTM4A
ENSG00000068724	-1.09248	3.95611	0.0528773	-1.26431	3.95611	0.0162337	-0.221733	3.95611	0.778877	-1.09724	3.95611	0.056628	TTC7A
ENSG00000068745	0.0556051	5.85422	0.944912	-0.0786828	5.85422	0.922836	-0.106873	5.85422	0.8949	1.34654	5.85422	0.00115248	IP6K2
ENSG00000068784	0.254839	5.17165	0.744073	0.0800218	5.17165	0.919559	-0.221134	5.17165	0.779295	-0.0535398	5.17165	0.946981	SRBD1
ENSG00000068796	-0.155701	6.06408	0.844797	-0.186584	6.06408	0.813839	0.243223	6.06408	0.755551	-0.619448	6.06408	0.381489	KIF2A
ENSG00000068878	0.148294	6.27949	0.850853	0.263162	6.27949	0.735709	-0.188872	6.27949	0.811549	-0.534659	6.27949	0.465714	PSME4
ENSG00000068885	-0.220261	3.79293	0.77998	-0.543594	3.79293	0.460386	0.469267	3.79293	0.530109	-0.0938064	3.79293	0.906261	IFT80
ENSG00000068903	-0.548131	4.84812	0.452459	-0.943499	4.84812	0.112528	0.151431	4.84812	0.847487	0.220064	4.84812	0.778926	SIRT2
ENSG00000068912	0.17577	6.35929	0.823102	0.509317	6.35929	0.489731	-0.0789645	6.35929	0.921917	-0.769778	6.35929	0.23859	ERLEC1
ENSG00000068976	0.0552036	1.00205	0.974599	1.0929	1.00205	0.371084	0.234216	1.00205	0.854441	6.6418	1.00205	2.46e-13	PYGM
ENSG00000069020	1.05947	5.7178	0.0425796	1.16754	5.7178	0.0149264	0.572473	5.7178	0.426374	0.343681	5.7178	0.656151	MAST4
ENSG00000069122	1.04175	4.8684	0.0566495	0.405784	4.8684	0.594033	0.617881	4.8684	0.38211	0.310899	4.8684	0.688406	ADGRF5
ENSG00000069248	-0.150976	5.40398	0.849498	-0.32561	5.40398	0.674984	0.170776	5.40398	0.828139	-0.657179	5.40398	0.345421	NUP133
ENSG00000069275	-0.356467	10.7462	0.645159	-0.501201	10.7462	0.499783	-0.249507	10.7462	0.75125	-1.04778	10.7462	0.0448559	NUCKS1
ENSG00000069329	-0.107294	7.2632	0.894326	0.0083886	7.2632	0.99121	-0.0887634	7.2632	0.912908	-0.487687	7.2632	0.5134	VPS35
ENSG00000069345	0.42585	6.39677	0.578037	0.576429	6.39677	0.422317	-0.0986324	6.39677	0.903033	0.863171	6.39677	0.155257	DNAJA2
ENSG00000069399	1.28736	7.07555	0.00236167	1.64359	7.07555	8.19e-07	1.5084	7.07555	2.75e-05	2.51335	7.07555	2.96e-17	BCL3
ENSG00000069424	-0.169899	1.97393	0.830697	-0.906182	1.97393	0.218165	0.605165	1.97393	0.412313	-0.00582532	1.97393	0.992107	KCNAB2
ENSG00000069493	0.0848008	3.55946	0.915526	1.76172	3.55946	0.00015949	0.382531	3.55946	0.616328	3.996	3.55946	5.46e-17	CLEC2D
ENSG00000069509	0.0536466	6.22445	0.946419	0.0957772	6.22445	0.904418	-0.128442	6.22445	0.872523	1.11658	6.22445	0.0230802	FUNDC1
ENSG00000069667	0.251022	3.08008	0.748729	-0.496455	3.08008	0.512995	0.109687	3.08008	0.889115	1.20022	3.08008	0.045959	RORA
ENSG00000069702	-0.268773	6.81471	0.731785	-0.42131	6.81471	0.585115	0.14564	6.81471	0.85544	-2.61258	6.81471	7.57e-16	TGFBR3
ENSG00000069849	0.183137	8.77209	0.81541	-0.115232	8.77209	0.885925	0.440926	8.77209	0.558257	-0.408312	8.77209	0.593303	ATP1B3
ENSG00000069869	0.626165	6.85995	0.372858	0.880389	6.85995	0.14063	0.460648	6.85995	0.540377	0.86595	6.85995	0.152407	NEDD4
ENSG00000069956	0.664718	5.71833	0.335736	1.00307	5.71833	0.0668335	0.0175875	5.71833	0.981961	0.940216	5.71833	0.103475	MAPK6
ENSG00000069966	-0.426682	4.80119	0.574516	-1.21958	4.80119	0.0161185	-0.0992313	4.80119	0.901533	-0.140414	4.80119	0.859988	GNB5
ENSG00000069974	-0.513095	6.17378	0.487397	-0.502181	6.17378	0.498374	0.3543	6.17378	0.646303	-0.663256	6.17378	0.338583	RAB27A
ENSG00000069998	-0.470818	3.62016	0.534114	-0.704131	3.62016	0.324474	0.0258854	3.62016	0.972668	-0.53519	3.62016	0.475063	HDHD5
ENSG00000070010	-0.0891095	7.02168	0.912508	-0.186335	7.02168	0.814078	0.240582	7.02168	0.758108	0.0424913	7.02168	0.957618	UFD1
ENSG00000070018	-0.201443	4.27637	0.798958	-0.397035	4.27637	0.603185	0.00970061	4.27637	0.989498	-2.01367	4.27637	9.56e-06	LRP6
ENSG00000070047	-0.171687	5.98399	0.828792	-0.0647037	5.98399	0.936311	-0.325742	5.98399	0.675184	-1.01698	5.98399	0.0636982	PHRF1
ENSG00000070061	-0.468435	3.99912	0.531904	-0.757212	3.99912	0.260077	-0.237852	3.99912	0.762566	-0.330993	3.99912	0.668851	ELP1
ENSG00000070081	0.334582	8.08723	0.664794	0.583742	8.08723	0.414846	0.418027	8.08723	0.585182	0.548649	8.08723	0.450065	NUCB2
ENSG00000070087	-0.233087	1.78595	0.766212	-1.85699	1.78595	0.00682629	0.127662	1.78595	0.871122	-0.382215	1.78595	0.623148	PFN2
ENSG00000070214	-1.04119	7.5728	0.0458868	-0.849771	7.5728	0.165946	0.033475	7.5728	0.966586	-0.426281	7.5728	0.578652	SLC44A1
ENSG00000070269	-0.0388686	3.86791	0.961584	-0.1082	3.86791	0.89191	-0.0650341	3.86791	0.935571	0.259649	3.86791	0.739506	TMEM260
ENSG00000070366	0.514507	3.37236	0.48625	0.360828	3.37236	0.638344	-0.432199	3.37236	0.568196	-0.94883	3.37236	0.151202	SMG6
ENSG00000070367	0.0496903	6.07627	0.949208	0.152272	6.07627	0.846493	0.00656085	6.07627	0.992334	0.0344892	6.07627	0.964516	EXOC5
ENSG00000070371	-0.260016	1.94503	0.739281	-0.75443	1.94503	0.308693	0.295791	1.94503	0.703496	0.300417	1.94503	0.702897	CLTCL1
ENSG00000070404	-0.730832	3.20415	0.289774	-0.651773	3.20415	0.359323	-1.06155	3.20415	0.0777553	-0.128736	3.20415	0.870997	FSTL3
ENSG00000070413	-0.394807	5.08926	0.606159	-0.421144	5.08926	0.579722	-0.179448	5.08926	0.821092	-1.45188	5.08926	0.00118428	DGCR2
ENSG00000070423	-0.390904	5.73026	0.611097	-0.473061	5.73026	0.529713	-0.161395	5.73026	0.840208	-0.824406	5.73026	0.212687	RNF126
ENSG00000070444	0.220432	4.03904	0.778457	0.365125	4.03904	0.633929	0.436453	4.03904	0.562441	-0.102321	4.03904	0.897508	MNT
ENSG00000070476	-0.34335	4.21083	0.657003	-0.203725	4.21083	0.796583	-0.213264	4.21083	0.787193	-1.09001	4.21083	0.0611532	ZXDC
ENSG00000070495	0.047262	5.34826	0.952327	-0.198668	5.34826	0.801638	0.138579	5.34826	0.860706	1.99983	5.34826	6.42e-10	JMJD6
ENSG00000070501	0.00586565	4.64276	0.99363	-0.24501	4.64276	0.755155	0.0909054	4.64276	0.908465	0.853204	4.64276	0.172324	POLB
ENSG00000070526	0.0450853	1.99167	0.954385	-1.32911	1.99167	0.0443469	-0.834388	1.99167	0.231414	-1.18377	1.99167	0.0880832	ST6GALNAC1
ENSG00000070540	0.613031	3.28292	0.392303	0.673849	3.28292	0.337195	0.591059	3.28292	0.411934	-0.909699	3.28292	0.183338	WIPI1
ENSG00000070610	0.524948	3.20526	0.475974	0.537787	3.20526	0.463925	0.372919	3.20526	0.625526	-0.244252	3.20526	0.754376	GBA2
ENSG00000070614	-0.630489	6.728	0.378288	-0.708585	6.728	0.307189	-0.534073	6.728	0.470469	-2.67265	6.728	3.88e-08	NDST1
ENSG00000070669	-0.098375	4.91998	0.902469	0.302958	4.91998	0.695981	-0.86443	4.91998	0.187522	0.625364	4.91998	0.38177	ASNS
ENSG00000070718	-0.337957	5.0574	0.662734	-0.4742	5.0574	0.526333	-0.177437	5.0574	0.82308	-1.19349	5.0574	0.0197142	AP3M2
ENSG00000070731	-0.917865	2.86393	0.203816	-1.03476	2.86393	0.149663	-0.0768614	2.86393	0.924856	-0.100713	2.86393	0.900174	ST6GALNAC2
ENSG00000070756	-0.0796551	10.8276	0.921508	-0.0488748	10.8276	0.952269	0.416998	10.8276	0.583346	0.638843	10.8276	0.360537	PABPC1
ENSG00000070759	0.352707	2.34795	0.652738	0.696339	2.34795	0.343684	0.511142	2.34795	0.500092	1.30562	2.34795	0.040141	TESK2
ENSG00000070761	-0.46752	4.18789	0.533609	-0.54002	4.18789	0.462779	-0.0185846	4.18789	0.982387	1.0932	4.18789	0.0506298	CFAP20
ENSG00000070770	-0.0416333	7.08247	0.959548	-0.00021463	7.08247	1.00065	0.0198907	7.08247	0.979921	0.705579	7.08247	0.296414	CSNK2A2
ENSG00000070778	-0.330784	4.07195	0.669222	-0.176677	4.07195	0.823487	-0.557963	4.07195	0.443302	0.951628	4.07195	0.110409	PTPN21
ENSG00000070785	-0.0987261	4.80957	0.901904	-0.336928	4.80957	0.66354	-0.168691	4.80957	0.831848	-0.465897	4.80957	0.534421	EIF2B3
ENSG00000070814	0.213418	7.35538	0.785275	0.0423336	7.35538	0.956957	0.0927715	7.35538	0.906545	-1.07776	7.35538	0.0346584	TCOF1
ENSG00000070831	0.153124	7.04615	0.845586	0.384235	7.04615	0.614987	0.16551	7.04615	0.833154	-1.0165	7.04615	0.0685977	CDC42
ENSG00000070882	0.124132	4.81644	0.87624	0.0620058	4.81644	0.9384	-0.310595	4.81644	0.68984	-0.48005	4.81644	0.520184	OSBPL3
ENSG00000070950	0.436181	5.38538	0.563815	-0.0375941	5.38538	0.963051	0.247626	5.38538	0.751215	-0.0916262	5.38538	0.9088	RAD18
ENSG00000070961	0.406179	5.72557	0.595221	0.993044	5.72557	0.0721565	-0.00160748	5.72557	0.999151	1.97339	5.72557	1.07e-10	ATP2B1
ENSG00000071051	-0.518095	2.58915	0.506818	-0.158869	2.58915	0.843269	0.516159	2.58915	0.497745	-1.02315	2.58915	0.184974	NCK2
ENSG00000071054	0.238006	8.4149	0.76066	0.825267	8.4149	0.185365	-0.594433	8.4149	0.405967	0.387982	8.4149	0.615603	MAP4K4
ENSG00000071073	-0.447072	4.30416	0.55286	0.126037	4.30416	0.873117	0.627838	4.30416	0.373112	0.131797	4.30416	0.867525	MGAT4A
ENSG00000071082	0.0983494	9.87759	0.901137	0.172367	9.87759	0.82649	0.596824	9.87759	0.401911	0.857589	9.87759	0.158987	RPL31
ENSG00000071127	-0.143489	7.38427	0.857461	0.0334394	7.38427	0.966439	-0.124727	7.38427	0.876588	-0.387441	7.38427	0.615612	WDR1
ENSG00000071189	0.176326	4.58323	0.822581	0.0716131	4.58323	0.927537	0.429455	4.58323	0.569524	-0.594251	4.58323	0.408576	SNX13
ENSG00000071205	-0.506842	6.28087	0.493708	-0.529133	6.28087	0.471275	-0.481921	6.28087	0.51895	0.277285	6.28087	0.721672	ARHGAP10
ENSG00000071242	-1.23376	6.69246	0.00823327	-1.82372	6.69246	1.97e-06	-0.280947	6.69246	0.719886	-0.80894	6.69246	0.204676	RPS6KA2
ENSG00000071243	0.0216894	5.52782	0.978262	0.0182614	5.52782	0.981647	-0.0813561	5.52782	0.920095	1.46107	5.52782	0.000177821	ING3
ENSG00000071462	0.117785	6.28776	0.881911	0.126616	6.28776	0.872996	-0.126593	6.28776	0.874238	0.275793	6.28776	0.723176	BUD23
ENSG00000071537	0.262745	6.64439	0.736084	0.336077	6.64439	0.663369	0.0624647	6.64439	0.937969	-0.752986	6.64439	0.253166	SEL1L
ENSG00000071539	-0.297018	5.27114	0.703622	-0.523266	5.27114	0.477411	-0.397386	5.27114	0.6036	-0.501478	5.27114	0.499153	TRIP13
ENSG00000071553	-0.199511	7.18307	0.801117	-0.0653116	7.18307	0.935709	-0.202019	7.18307	0.798607	0.422548	7.18307	0.576983	ATP6AP1
ENSG00000071564	-0.893086	6.39471	0.136209	-1.2341	6.39471	0.0084995	-0.0365957	6.39471	0.964436	-0.572718	6.39471	0.428057	TCF3
ENSG00000071575	-0.823377	4.18991	0.203744	-1.02851	4.18991	0.0796449	0.670047	4.18991	0.33262	-0.350331	4.18991	0.649581	TRIB2
ENSG00000071626	0.0812854	7.6162	0.918749	0.082141	7.6162	0.91789	-0.405524	7.6162	0.59759	-0.368174	7.6162	0.633996	DAZAP1
ENSG00000071655	-0.803344	5.91903	0.24282	-1.1366	5.91903	0.0652535	-1.31048	5.91903	0.0243043	-1.23378	5.91903	0.0413113	MBD3
ENSG00000071794	-0.537187	5.83403	0.463214	-0.985616	5.83403	0.0783701	0.160378	5.83403	0.838596	-0.659138	5.83403	0.342817	HLTF
ENSG00000071859	-0.195056	6.77405	0.805342	-0.394167	6.77405	0.607877	-0.158899	6.77405	0.84163	-0.407547	6.77405	0.59444	FAM50A
ENSG00000071889	-0.545456	3.2961	0.457377	-1.08317	3.2961	0.0748665	-0.179455	3.2961	0.820923	-0.433672	3.2961	0.566788	FAM3A
ENSG00000071894	0.00174764	3.15696	0.997801	-0.165347	3.15696	0.834339	0.0251443	3.15696	0.974063	-0.653645	3.15696	0.363011	CPSF1
ENSG00000071967	-0.124549	5.65321	0.876575	-0.55427	5.65321	0.44894	0.174678	5.65321	0.823787	0.185149	5.65321	0.813537	CYBRD1
ENSG00000071994	-0.181195	5.72079	0.819253	0.0419737	5.72079	0.957693	0.0896206	5.72079	0.91015	-0.37836	5.72079	0.622938	PDCD2
ENSG00000072041	-0.677878	2.63309	0.35935	-0.772662	2.63309	0.291327	0.906897	2.63309	0.173021	-0.717316	2.63309	0.339194	SLC6A15
ENSG00000072042	0.269725	7.02937	0.729107	0.170947	7.02937	0.827979	0.32255	7.02937	0.676655	-0.490379	7.02937	0.510294	RDH11
ENSG00000072062	-0.659873	7.16965	0.343741	-1.05446	7.16965	0.0518563	-0.262167	7.16965	0.738924	-0.315043	7.16965	0.686231	PRKACA
ENSG00000072071	-0.383847	4.24315	0.616982	-0.159678	4.24315	0.840927	0.856375	4.24315	0.177872	-0.124482	4.24315	0.875997	ADGRL1
ENSG00000072110	-0.223997	9.73552	0.7766	0.242752	9.73552	0.755777	-0.59339	9.73552	0.407391	-0.924433	9.73552	0.111541	ACTN1
ENSG00000072121	1.0973	5.1824	0.0403224	1.65673	5.1824	5.11e-05	0.0808097	5.1824	0.918207	-0.460598	5.1824	0.53969	ZFYVE26
ENSG00000072134	-0.748916	6.03474	0.257001	-0.772192	6.03474	0.235682	-0.120963	6.03474	0.879815	-1.23444	6.03474	0.00818585	EPN2
ENSG00000072135	-0.673368	4.70291	0.330492	-0.944643	4.70291	0.112063	-0.547151	4.70291	0.453523	-0.551929	4.70291	0.448931	PTPN18
ENSG00000072163	-1.57746	6.55706	0.000899771	-1.94545	6.55706	1.75e-05	-0.864344	6.55706	0.176052	-1.45558	6.55706	0.00331612	LIMS2
ENSG00000072201	0.321671	1.79826	0.69229	-0.488622	1.79826	0.555021	0.619977	1.79826	0.42332	-0.155151	1.79826	0.850811	LNX1
ENSG00000072210	-0.585867	6.25091	0.415498	-0.984907	6.25091	0.0842122	0.669377	6.25091	0.331966	-1.24253	6.25091	0.0114784	ALDH3A2
ENSG00000072274	0.101655	7.84201	0.897957	-1.3931	7.84201	0.000442303	-0.0947985	7.84201	0.906371	-0.595478	7.84201	0.404904	TFRC
ENSG00000072310	0.133912	4.83798	0.86523	0.73581	4.83798	0.271133	0.927445	4.83798	0.116832	0.306274	4.83798	0.692959	SREBF1
ENSG00000072364	0.26923	6.83091	0.729615	0.355383	6.83091	0.64522	-0.22148	6.83091	0.778889	0.512712	6.83091	0.48633	AFF4
ENSG00000072401	0.160586	4.18482	0.838437	0.409722	4.18482	0.592316	0.487509	4.18482	0.515898	0.769686	4.18482	0.270485	UBE2D1
ENSG00000072415	-0.779061	6.58009	0.228438	-0.927934	6.58009	0.108671	-0.422578	6.58009	0.584754	0.571073	6.58009	0.427606	MPP5
ENSG00000072422	-0.206787	3.24343	0.793447	-0.876614	3.24343	0.194727	0.140679	3.24343	0.8579	-0.2024	3.24343	0.797288	RHOBTB1
ENSG00000072501	-0.0484038	9.44015	0.95297	-0.189003	9.44015	0.811575	-0.376049	9.44015	0.62754	-0.345068	9.44015	0.656363	SMC1A
ENSG00000072506	-0.277827	6.11612	0.722782	-0.133467	6.11612	0.867155	-0.128563	6.11612	0.872182	-0.127663	6.11612	0.872951	HSD17B10
ENSG00000072518	-0.169207	5.52106	0.831273	-0.077718	5.52106	0.923068	-0.456326	5.52106	0.544777	-0.200529	5.52106	0.799875	MARK2
ENSG00000072571	-0.0437295	7.19782	0.957315	-0.274491	7.19782	0.726221	0.0567943	7.19782	0.942266	0.42305	7.19782	0.576583	HMMR
ENSG00000072609	0.255651	3.75213	0.74317	0.148738	3.75213	0.85039	0.0298063	3.75213	0.969509	-0.12423	3.75213	0.875615	CHFR
ENSG00000072682	-0.20517	3.62948	0.794944	0.0112825	3.62948	0.98819	-0.759352	3.62948	0.259542	-0.719461	3.62948	0.298999	P4HA2
ENSG00000072736	-0.0998019	2.43433	0.899725	-0.389157	2.43433	0.61235	-0.118961	2.43433	0.880892	0.0929549	2.43433	0.9076	NFATC3
ENSG00000072756	0.449709	4.29083	0.549428	0.255087	4.29083	0.743822	0.141374	4.29083	0.857647	0.635863	4.29083	0.366727	TRNT1
ENSG00000072778	0.0979344	6.35766	0.901507	0.0356589	6.35766	0.963739	-0.199397	6.35766	0.801013	-0.866094	6.35766	0.155648	ACADVL
ENSG00000072786	1.1035	5.85124	0.0283878	1.60251	5.85124	6.45e-06	0.0603638	5.85124	0.939188	0.0804309	5.85124	0.91916	STK10
ENSG00000072803	-0.268762	5.19391	0.731716	0.0968405	5.19391	0.902561	0.0326291	5.19391	0.966767	0.0105099	5.19391	0.988966	FBXW11
ENSG00000072818	-0.372065	2.61854	0.638156	-0.641245	2.61854	0.41048	0.530209	2.61854	0.485539	2.18725	2.61854	6.93e-05	ACAP1
ENSG00000072840	0.811789	2.62005	0.230944	0.615721	2.62005	0.396201	-0.588804	2.62005	0.423698	-0.616688	2.62005	0.407848	EVC
ENSG00000072849	0.318197	6.16563	0.680962	0.487809	6.16563	0.512439	0.0233315	6.16563	0.976512	0.679426	6.16563	0.321295	DERL2
ENSG00000072864	-0.458421	4.70777	0.542195	-0.648602	4.70777	0.354232	-0.63872	4.70777	0.363432	-1.98593	4.70777	1.13e-06	NDE1
ENSG00000072954	-1.43236	4.10517	0.00820106	-2.4375	4.10517	3.26e-06	0.220684	4.10517	0.77761	-1.02111	4.10517	0.103318	TMEM38A
ENSG00000072958	-0.350454	5.94884	0.65063	-0.403337	5.94884	0.597897	-0.327905	5.94884	0.673038	-1.08061	5.94884	0.0392088	AP1M1
ENSG00000073008	0.0358544	7.73257	0.963795	-0.231927	7.73257	0.768501	-0.167214	7.73257	0.83332	-1.08647	7.73257	0.0310046	PVR
ENSG00000073050	0.557672	2.55415	0.449266	-0.0453153	2.55415	0.953664	-0.163449	2.55415	0.835845	0.0792735	2.55415	0.922383	XRCC1
ENSG00000073060	-0.307641	5.25698	0.692966	-0.896685	5.25698	0.138861	0.119541	5.25698	0.879531	-0.117191	5.25698	0.883266	SCARB1
ENSG00000073111	-0.307969	6.54465	0.692835	-0.977604	6.54465	0.0796552	0.33925	6.54465	0.660295	0.909339	6.54465	0.119267	MCM2
ENSG00000073146	0.180055	2.62608	0.820031	0.74989	2.62608	0.285994	0.583262	2.62608	0.42531	0.257678	2.62608	0.745094	MOV10L1
ENSG00000073150	-1.17462	2.29013	0.108381	-0.492942	2.29013	0.529444	0.0599639	2.29013	0.939558	-0.405015	2.29013	0.61104	PANX2
ENSG00000073169	-0.226064	2.99875	0.773901	-0.50387	2.99875	0.502094	0.482356	2.99875	0.518748	-1.66511	2.99875	0.00825128	SELENOO
ENSG00000073331	-0.103487	4.81712	0.896841	0.517431	4.81712	0.481663	0.294969	4.81712	0.703848	1.15772	4.81712	0.0225732	ALPK1
ENSG00000073350	-0.856925	2.58605	0.206553	-1.57388	2.58605	0.00757405	-0.199565	2.58605	0.800645	-0.0797621	2.58605	0.920017	LLGL2
ENSG00000073417	0.214024	4.17109	0.784742	-0.110623	4.17109	0.889759	-0.00388566	4.17109	0.997102	0.321143	4.17109	0.678196	PDE8A
ENSG00000073464	0.161213	3.09137	0.837908	-0.0618168	3.09137	0.937852	0.475557	3.09137	0.524459	-1.0157	3.09137	0.128766	CLCN4
ENSG00000073536	-0.190085	3.26901	0.810412	-0.363575	3.26901	0.637331	-0.417663	3.26901	0.583834	-1.28194	3.26901	0.0361315	NLE1
ENSG00000073578	0.140961	5.20878	0.858195	0.18827	5.20878	0.810644	-0.0671184	5.20878	0.933633	-0.927415	5.20878	0.122394	SDHA
ENSG00000073584	0.0798105	4.81419	0.919875	-0.22581	4.81419	0.77449	0.0168339	4.81419	0.982699	0.37412	4.81419	0.625942	SMARCE1
ENSG00000073605	0.0626934	1.91392	0.937459	-0.165189	1.91392	0.833479	0.390583	1.91392	0.609942	0.0491064	1.91392	0.953487	GSDMB
ENSG00000073614	0.106969	7.57222	0.894406	0.153332	7.57222	0.847479	-0.266703	7.57222	0.733871	-0.646575	7.57222	0.35453	KDM5A
ENSG00000073711	0.216652	3.26619	0.78252	0.115074	3.26619	0.884526	0.255422	3.26619	0.743233	0.413467	3.26619	0.588631	PPP2R3A
ENSG00000073712	0.299252	7.8643	0.699598	0.217484	7.8643	0.781093	-0.714275	7.8643	0.28976	0.6321	7.8643	0.367242	FERMT2
ENSG00000073756	7.20113	1.19547	2.24e-09	8.10237	1.19547	1.44e-11	2.34299	1.19547	0.0792482	5.15526	1.19547	0.000146648	PTGS2
ENSG00000073792	-0.333104	7.16172	0.668023	-0.191648	7.16172	0.808764	0.0239864	7.16172	0.976025	-1.34918	7.16172	0.00123013	IGF2BP2
ENSG00000073803	-0.472633	6.47705	0.529059	0.159938	6.47705	0.838573	-0.502103	6.47705	0.499734	-0.190119	6.47705	0.811018	MAP3K13
ENSG00000073849	-0.613163	1.30135	0.45177	0.0302656	1.30135	0.975488	0.951373	1.30135	0.181423	-2.27154	1.30135	0.0236625	ST6GAL1
ENSG00000073910	-1.7125	4.80393	0.000661453	-2.62087	4.80393	3.77e-07	0.187634	4.80393	0.810735	0.294638	4.80393	0.704151	FRY
ENSG00000073921	0.644327	7.24442	0.354916	0.418815	7.24442	0.582255	0.15952	7.24442	0.839626	0.187723	7.24442	0.811099	PICALM
ENSG00000073969	-0.0284069	4.95425	0.972518	0.193164	4.95425	0.805607	-0.0725405	4.95425	0.928392	-0.533432	4.95425	0.468421	NSF
ENSG00000074054	0.0612008	5.41842	0.938166	0.335866	5.41842	0.663476	-0.0492932	5.41842	0.951494	-0.194029	5.41842	0.806285	CLASP1
ENSG00000074071	-0.880958	5.67749	0.147006	-1.00439	5.67749	0.0710722	-0.426521	5.67749	0.574697	-0.650128	5.67749	0.352264	MRPS34
ENSG00000074201	-0.153241	6.22919	0.847286	-0.297242	6.22919	0.703475	-0.339226	6.22919	0.661803	-0.0301753	6.22919	0.970682	CLNS1A
ENSG00000074266	0.131713	5.53806	0.867776	-0.00325861	5.53806	0.997486	-0.211561	5.53806	0.78886	1.057	5.53806	0.0440571	EED
ENSG00000074319	0.256701	5.33722	0.74223	0.505012	5.33722	0.494024	0.167268	5.33722	0.831705	0.46938	5.33722	0.530267	TSG101
ENSG00000074356	-0.119267	6.4835	0.883559	0.0186583	6.4835	0.981301	-0.145999	6.4835	0.856638	-0.645306	6.4835	0.355899	NCBP3
ENSG00000074410	1.18644	6.33874	0.0104267	1.54057	6.33874	1.73e-05	0.898609	6.33874	0.127924	-0.605376	6.33874	0.395364	CA12
ENSG00000074416	0.317044	6.6966	0.682122	0.477867	6.6966	0.522019	-0.766575	6.6966	0.239637	-0.588529	6.6966	0.411849	MGLL
ENSG00000074527	1.57737	6.63954	0.000651228	1.33397	6.63954	0.00845918	0.0823718	6.63954	0.915913	-0.941013	6.63954	0.139449	NTN4
ENSG00000074582	-0.0474869	3.72373	0.953173	-0.248971	3.72373	0.751145	-0.0349308	3.72373	0.965984	-0.181317	3.72373	0.818573	BCS1L
ENSG00000074590	0.874139	7.62773	0.154945	0.78602	7.62773	0.226518	0.441371	7.62773	0.557698	-1.1778	7.62773	0.0220768	NUAK1
ENSG00000074603	-0.0666918	5.50113	0.934349	-0.134792	5.50113	0.865809	0.0918403	5.50113	0.90829	0.0206987	5.50113	0.97904	DPP8
ENSG00000074621	0.420861	3.94023	0.578062	0.676483	3.94023	0.329353	-0.353304	3.94023	0.646343	0.603243	3.94023	0.399416	SLC24A1
ENSG00000074657	0.4322	4.93959	0.56886	0.501746	4.93959	0.497317	-0.176741	4.93959	0.823677	0.266798	4.93959	0.732286	ZNF532
ENSG00000074660	1.06218	3.58998	0.0699287	1.57784	3.58998	0.000884049	1.45022	3.58998	0.00285999	-0.0476246	3.58998	0.950698	SCARF1
ENSG00000074695	0.173309	7.60497	0.827638	0.161894	7.60497	0.839676	0.37969	7.60497	0.625704	-0.420767	7.60497	0.588229	LMAN1
ENSG00000074696	-0.764161	6.73013	0.241984	-1.0522	6.73013	0.0434794	-0.114803	6.73013	0.887644	0.00690316	6.73013	0.992841	HACD3
ENSG00000074706	1.64198	0.422059	0.254836	3.22975	0.422059	0.0115616	1.79224	0.422059	0.17783	7.16529	0.422059	1.69e-11	IPCEF1
ENSG00000074755	-0.00536059	4.85301	0.995448	-0.356091	4.85301	0.644999	-0.416816	4.85301	0.58572	-0.437977	4.85301	0.563445	ZZEF1
ENSG00000074800	0.0645495	9.52049	0.935717	0.0113114	9.52049	0.988251	0.288036	9.52049	0.710837	0.235448	9.52049	0.763222	ENO1
ENSG00000074842	0.352777	6.92033	0.647551	0.329034	6.92033	0.670246	0.0192431	6.92033	0.980423	-0.22901	6.92033	0.771374	MYDGF
ENSG00000074935	0.249149	2.08194	0.751754	0.499178	2.08194	0.510226	-0.604562	2.08194	0.418138	0.70397	2.08194	0.334155	TUBE1
ENSG00000075089	-0.0253799	4.95103	0.975325	0.15734	4.95103	0.84177	-0.0507725	4.95103	0.949943	-0.490322	4.95103	0.509884	ACTR6
ENSG00000075131	0.297935	4.54951	0.701037	0.308255	4.54951	0.690807	-0.0109934	4.54951	0.989782	1.17486	4.54951	0.0204788	TIPIN
ENSG00000075142	-0.541197	5.17341	0.460214	-0.687204	5.17341	0.319301	0.0603116	5.17341	0.938517	-0.955215	5.17341	0.111713	SRI
ENSG00000075151	-0.0208841	7.15831	0.980025	-0.16435	7.15831	0.836266	0.166843	7.15831	0.832875	-0.579533	7.15831	0.420782	EIF4G3
ENSG00000075188	-0.0173109	4.65077	0.98346	-0.0513062	4.65077	0.949328	0.0536045	4.65077	0.945424	0.736424	4.65077	0.271559	NUP37
ENSG00000075213	3.56511	7.66216	4.02e-19	3.64525	7.66216	1.62e-19	1.17304	7.66216	0.0147435	0.503106	7.66216	0.496168	SEMA3A
ENSG00000075218	-0.0782717	7.01413	0.923656	-0.352035	7.01413	0.649839	-0.317136	7.01413	0.683846	-0.308722	7.01413	0.692141	GTSE1
ENSG00000075223	1.64761	6.34598	8.14e-06	1.53636	6.34598	6.48e-05	0.0843317	6.34598	0.914801	-0.607712	6.34598	0.393557	SEMA3C
ENSG00000075234	0.105103	3.85248	0.894082	0.770007	3.85248	0.246782	0.179388	3.85248	0.819348	-0.137984	3.85248	0.861366	TTC38
ENSG00000075239	-0.299582	5.42712	0.701035	-0.45507	5.42712	0.54623	-0.221612	5.42712	0.778857	-0.132654	5.42712	0.867788	ACAT1
ENSG00000075275	0.348024	1.09166	0.673451	-0.761363	1.09166	0.379095	0.384842	1.09166	0.632201	3.29348	1.09166	1.93e-08	CELSR1
ENSG00000075292	0.359105	7.55298	0.641993	0.300062	7.55298	0.698959	0.0577316	7.55298	0.942673	0.71658	7.55298	0.286048	ZNF638
ENSG00000075303	-0.353148	3.40439	0.646572	-0.729318	3.40439	0.291504	0.368014	3.40439	0.630832	-0.285568	3.40439	0.713639	SLC25A40
ENSG00000075336	-0.0957456	4.64659	0.904837	-0.462307	4.64659	0.537993	-0.11603	4.64659	0.88459	0.378899	4.64659	0.620865	TIMM21
ENSG00000075391	0.599626	4.80914	0.400176	0.723605	4.80914	0.281713	-0.21438	4.80914	0.78594	-0.0224776	4.80914	0.977928	RASAL2
ENSG00000075407	-0.323604	6.22198	0.677314	-0.618189	6.22198	0.382526	-0.327123	6.22198	0.673851	-0.379773	6.22198	0.622712	ZNF37A
ENSG00000075413	0.0416578	5.34879	0.958456	0.538016	5.34879	0.460947	0.23674	5.34879	0.762081	-0.111392	5.34879	0.889451	MARK3
ENSG00000075415	0.221092	7.71795	0.777499	0.170509	7.71795	0.82819	0.401236	7.71795	0.598192	-0.063129	7.71795	0.93794	SLC25A3
ENSG00000075420	0.759046	7.5872	0.245142	1.24582	7.5872	0.00399085	0.237583	7.5872	0.761117	-0.248304	7.5872	0.752165	FNDC3B
ENSG00000075426	0.617093	8.28096	0.38175	0.587036	8.28096	0.411541	0.166076	8.28096	0.832741	-1.90299	8.28096	1.8e-07	FOSL2
ENSG00000075539	0.45209	6.12432	0.548962	0.294596	6.12432	0.704444	-0.117009	6.12432	0.883918	-0.282263	6.12432	0.718253	FRYL
ENSG00000075568	-0.082917	5.03147	0.917632	0.0157546	5.03147	0.983722	-0.130564	5.03147	0.869954	0.0550392	5.03147	0.944517	TMEM131
ENSG00000075618	-0.840715	6.16997	0.175141	-1.21792	6.16997	0.0086296	-0.447335	6.16997	0.555059	-0.0619448	6.16997	0.939156	FSCN1
ENSG00000075624	-0.475758	7.93752	0.525831	-0.441964	7.93752	0.560754	-0.906549	7.93752	0.120977	-0.759555	7.93752	0.246078	ACTB
ENSG00000075643	0.0252004	4.63403	0.974145	0.294111	4.63403	0.704879	0.167347	4.63403	0.831526	-1.04413	4.63403	0.073979	MOCOS
ENSG00000075651	1.29593	5.20673	0.00404906	1.40118	5.20673	0.000908383	0.69733	5.20673	0.305273	0.986871	5.20673	0.0826621	PLD1
ENSG00000075702	-0.156166	4.13126	0.844183	-0.438165	4.13126	0.561903	0.176637	4.13126	0.822175	-0.431765	4.13126	0.56818	WDR62
ENSG00000075711	0.316539	6.83668	0.682627	0.2595	6.83668	0.73931	0.0818635	6.83668	0.918883	-0.878231	6.83668	0.145543	DLG1
ENSG00000075785	-0.0664459	8.84108	0.935305	-0.0564316	8.84108	0.945119	0.0402827	8.84108	0.959976	-0.195864	8.84108	0.804648	RAB7A
ENSG00000075790	0.602495	7.38811	0.396205	0.790936	7.38811	0.21598	0.300706	7.38811	0.698309	0.183116	7.38811	0.815741	BCAP29
ENSG00000075826	-0.489873	2.23519	0.515815	-0.648298	2.23519	0.375378	0.0978633	2.23519	0.900829	-1.14862	2.23519	0.0924263	SEC31B
ENSG00000075856	0.192286	6.16128	0.806535	-0.0712937	6.16128	0.929895	-0.166528	6.16128	0.833951	-1.01091	6.16128	0.0666906	SART3
ENSG00000075914	-0.199135	4.36988	0.801307	-0.410131	4.36988	0.590292	0.0200051	4.36988	0.97902	-0.726815	4.36988	0.285321	EXOSC7
ENSG00000075945	0.421123	4.60557	0.578042	0.793182	4.60557	0.221424	0.255984	4.60557	0.74279	0.320987	4.60557	0.678251	KIFAP3
ENSG00000075975	-0.40563	2.97859	0.594703	-0.442595	2.97859	0.558416	-0.572855	2.97859	0.432229	-0.786929	2.97859	0.257235	MKRN2
ENSG00000076003	-0.973832	5.49868	0.0863551	-1.56077	5.49868	0.000109944	0.0900005	5.49868	0.909517	0.116463	5.49868	0.882949	MCM6
ENSG00000076043	-0.156862	5.89846	0.844335	-0.487707	5.89846	0.514399	0.498552	5.89846	0.500942	0.236212	5.89846	0.762428	REXO2
ENSG00000076053	-0.237886	3.42259	0.761492	0.320332	3.42259	0.678516	0.340645	3.42259	0.657807	0.908449	3.42259	0.150744	RBM7
ENSG00000076067	0.0192862	5.8718	0.98004	0.441665	5.8718	0.558304	-0.207334	5.8718	0.793092	-0.968286	5.8718	0.0912221	RBMS2
ENSG00000076108	0.555783	7.66228	0.442844	0.816251	7.66228	0.193193	-0.0106541	7.66228	0.990284	-0.602149	7.66228	0.39832	BAZ2A
ENSG00000076201	-0.272214	5.60524	0.72853	-0.117899	5.60524	0.882879	-0.60504	5.60524	0.39673	-1.66548	5.60524	0.000161489	PTPN23
ENSG00000076242	0.151301	5.40903	0.848153	0.196171	5.40903	0.802739	-0.15743	5.40903	0.84305	-0.11953	5.40903	0.881004	MLH1
ENSG00000076248	-0.883525	6.85039	0.149988	-1.27123	6.85039	0.00850168	-0.151068	6.85039	0.850006	-0.000282524	6.85039	1.00093	UNG
ENSG00000076321	0.176652	4.38979	0.822237	0.187784	4.38979	0.811158	-0.00389208	4.38979	0.996987	-0.401117	4.38979	0.598952	KLHL20
ENSG00000076351	-0.44083	2.11539	0.567759	-1.05804	2.11539	0.136352	-0.144645	2.11539	0.856147	0.0538197	2.11539	0.947354	SLC46A1
ENSG00000076356	-0.289726	6.10858	0.710994	-0.353514	6.10858	0.647935	-0.756829	6.10858	0.249137	-1.33381	6.10858	0.00227331	PLXNA2
ENSG00000076382	0.0479231	4.86666	0.951515	-0.528551	4.86666	0.471864	0.17011	4.86666	0.828794	-0.208129	4.86666	0.792087	SPAG5
ENSG00000076513	-0.471178	6.30414	0.530401	-0.500173	6.30414	0.500425	-0.163427	6.30414	0.837078	-0.291729	6.30414	0.708947	ANKRD13A
ENSG00000076555	-1.38189	1.90435	0.038797	-2.06534	1.90435	0.00251518	-0.265733	1.90435	0.735043	-0.393974	1.90435	0.612552	ACACB
ENSG00000076641	1.17229	3.4455	0.0848387	0.716938	3.4455	0.341479	-0.035044	3.4455	0.967053	-0.157119	3.4455	0.847527	PAG1
ENSG00000076650	0.154676	4.9191	0.844276	-0.0858073	4.9191	0.914703	-0.310406	4.9191	0.69007	-0.0923031	4.9191	0.908057	GPATCH1
[truncated: 10,416 more rows]

## Sheet: Ensembl ID to HGNC symbol
ENSEMBLGENE	logFC	logCPM	Pvalue	logFC.1	logCPM.1	Pvalue.1	logFC.2	logCPM.2	Pvalue.2	logFC.3	logCPM.3	Pvalue.3	hgnc_symbol
[truncated: 11,357 more rows]

[truncated: 2 more sheets: Ensembl ID to gene description, Ensmebl ID to UniProt ID]
