# Supplementary material for: Development of a bioinformatics platform for analysis of quantitative transcriptomics and proteomics data: the OMnalysis
Source: PeerJ. 2021 Nov 9;9:e12415. doi: 10.7717/peerj.12415 (PMC8588854; doi:10.7717/peerj.12415)
Supplement: Supplemental Information 8 [file peerj-09-12415-s008.xlsx]

## Sheet: UniProt ID to Ensembl ID
UniProt ID	FDR-adjusted P-value	logFC	Treatments	ensembl_gene_id
A4FUA8	0.000185668	5.63894	3	ENSBTAG00000014295
A4FUA8	4.34e-08	9.61609	4	ENSBTAG00000014295
A4IF97	8.54e-06	6.32711	4	ENSBTAG00000026266
A4IFB6	3.61e-05	8.33509	2	ENSBTAG00000004834
A4IFB6	0.00328328	5.49666	1	ENSBTAG00000004834
A4IFB6	0.000311413	7.00967	3	ENSBTAG00000004834
A4IFB6	0.00132329	6.09298	4	ENSBTAG00000004834
A4Z945	0.00079335	7.94712	4	ENSBTAG00000030282
A4Z945	0.000260475	8.81353	3	ENSBTAG00000030282
A4Z945	0.00169699	7.34167	2	ENSBTAG00000030282
A5D7A0	7.4e-07	9.26956	3	ENSBTAG00000009048
A5D7A0	9.14e-08	10.4032	4	ENSBTAG00000009048
A5D7D1	2.56e-05	9.35666	4	ENSBTAG00000011215
A5D7D1	0.0038029	5.91108	3	ENSBTAG00000011215
A5PJS6	0.0200649	-5.48187	4	ENSBTAG00000009446
A8YXY3	0.00137196	-6.93811	4	ENSBTAG00000052268
A8YXY3	0.00147422	-6.88493	3	ENSBTAG00000052268
O46375	0.00649666	1.15825	2	ENSBTAG00000010991
O46375	0.00299574	1.27892	1	ENSBTAG00000010991
O77834	0.00368344	4.33346	3	ENSBTAG00000004855
O77834	2.52e-07	9.10335	4	ENSBTAG00000004855
O97680	5.21e-05	7.64126	4	ENSBTAG00000002953
O97680	0.000619452	6.19604	3	ENSBTAG00000002953
P01035	0.000593075	-1.46485	4	ENSBTAG00000000598
P02192	1.06e-05	-1.69545	4	ENSBTAG00000005333
P02192	0.00185939	-1.09592	2	ENSBTAG00000005333
P02192	1.79e-05	-1.63523	3	ENSBTAG00000005333
P02584	3.68e-07	11.8912	4	ENSBTAG00000004915
P02584	8.79e-05	8.31107	2	ENSBTAG00000004915
P02584	9.99e-07	11.2311	3	ENSBTAG00000004915
P02584	0.00336022	5.84674	1	ENSBTAG00000004915
P02754	2.23e-07	-3.61462	3	ENSBTAG00000014678
P02754	0.000276251	-2.23419	2	ENSBTAG00000014678
P02754	7.57e-09	-4.30143	4	ENSBTAG00000014678
P02754	0.00288394	-1.76073	1	ENSBTAG00000014678
P07688	1.35e-06	7.53791	4	ENSBTAG00000012442
P08037	0.00192624	-5.66784	2	ENSBTAG00000015249
P08166	0.000204713	4.04032	4	ENSBTAG00000017605
P09487	0.00338382	3.08083	4	ENSBTAG00000008951
P10096	0.00358276	4.28202	2	ENSBTAG00000014731
P10096	8.57e-09	10.6749	4	ENSBTAG00000014731
P10096	4.3e-07	8.70175	3	ENSBTAG00000014731
P10103	0.000412652	7.51555	4	ENSBTAG00000018103
P10103	0.00630739	5.55803	3	ENSBTAG00000018103
P10790	1.78e-07	-4.52013	4	ENSBTAG00000016819
P10790	8.71e-05	-3.03769	2	ENSBTAG00000016819
P10790	3.42e-07	-4.36105	3	ENSBTAG00000016819
P10790	0.000324267	-2.72112	1	ENSBTAG00000016819
P11116	1.27e-07	7.31999	4	ENSBTAG00000015089
P11116	0.00457273	3.26635	3	ENSBTAG00000015089
P13696	0.00213288	-5.18271	3	ENSBTAG00000018115
P13696	0.00177996	-5.28879	1	ENSBTAG00000018115
P13696	0.000234143	-6.44191	2	ENSBTAG00000018115
P15497	2.95e-05	2.65339	1	ENSBTAG00000002258
P15497	1.65e-05	2.76396	3	ENSBTAG00000002258
P15497	0.000688699	2.04206	4	ENSBTAG00000002258
P15497	4.7e-06	3.00429	2	ENSBTAG00000002258
P17697	0.0170243	-1.42455	3	ENSBTAG00000005574
P17697	0.00327738	-1.80158	2	ENSBTAG00000005574
P19035	0.00700333	6.23359	1	ENSBTAG00000012398
P19035	0.000765338	8.06365	3	ENSBTAG00000012398
P19035	0.0031963	6.9009	2	ENSBTAG00000012398
P19035	0.0238946	5.12334	4	ENSBTAG00000012398
P19120	9.9e-05	7.63568	4	ENSBTAG00000013162
P19120	0.00293336	5.51203	3	ENSBTAG00000013162
P19660	1.88e-05	10.7166	4	ENSBTAG00000024852
P19660	0.0057626	6.27835	1	ENSBTAG00000024852
P19660	1.22e-05	11.0387	3	ENSBTAG00000024852
P19660	3.86e-05	10.179	2	ENSBTAG00000024852
P19858	1.37e-12	8.30313	4	ENSBTAG00000008683
P21752	0.00235855	8.36504	3	ENSBTAG00000005654
P21752	0.0148924	6.50534	4	ENSBTAG00000005654
P21856	2.07e-09	8.28498	4	ENSBTAG00000012125
P21856	0.0107476	2.67299	3	ENSBTAG00000012125
P22226	1.4e-10	12.83	3	ENSBTAG00000013356
P22226	2.83e-08	10.0031	1	ENSBTAG00000013356
P22226	7.61e-10	11.8962	2	ENSBTAG00000013356
P22226	4.27e-10	12.2115	4	ENSBTAG00000013356
P24627	5.77e-07	2.45018	4	ENSBTAG00000001292
P25326	2.46e-05	7.05894	3	ENSBTAG00000017135
P25326	5.37e-06	7.82146	4	ENSBTAG00000017135
P26201	0.000103282	-6.44679	2	ENSBTAG00000017866
P26201	0.000103282	-6.44679	3	ENSBTAG00000017866
P26201	0.000103282	-6.44679	1	ENSBTAG00000017866
P26201	0.000103282	-6.44679	4	ENSBTAG00000017866
P28782	0.00398483	4.95169	4	ENSBTAG00000012640
P28800	0.00206192	1.61336	4	ENSBTAG00000020859
P28800	3.88e-05	2.30492	1	ENSBTAG00000020859
P28800	8.39e-06	2.56408	2	ENSBTAG00000020859
P28800	6.87e-05	2.20758	3	ENSBTAG00000020859
P29392	0.00012937	-8.35296	3	ENSBTAG00000010796
P29392	0.00012937	-8.35296	4	ENSBTAG00000010796
P29392	0.00812873	-5.39343	2	ENSBTAG00000010796
P31976	0.000119564	7.6299	4	ENSBTAG00000010347
P31976	0.00155487	6.01021	3	ENSBTAG00000010347
P33046	1.08e-06	11.3547	2	ENSBTAG00000053016
P33046	1.08e-06	11.3547	2	ENSBTAG00000052903
P33046	8.29e-07	11.5329	4	ENSBTAG00000053016
P33046	8.29e-07	11.5329	4	ENSBTAG00000052903
P33046	3.01e-07	12.2147	3	ENSBTAG00000053016
P33046	3.01e-07	12.2147	3	ENSBTAG00000052903
P33046	0.000265995	7.70114	1	ENSBTAG00000053016
P33046	0.000265995	7.70114	1	ENSBTAG00000052903
P33097	0.010577	1.91663	4	ENSBTAG00000011960
P40673	0.00634388	4.11137	3	ENSBTAG00000015101
P40673	9.86e-07	8.57869	4	ENSBTAG00000015101
P41541	0.00115615	-8.88178	3	ENSBTAG00000017028
P42899	7.17e-07	5.566	4	ENSBTAG00000001777
P48616	8.17e-11	11.0733	3	ENSBTAG00000018463
P48616	2.19e-05	5.70131	1	ENSBTAG00000018463
P48616	2.23e-12	12.8821	4	ENSBTAG00000018463
P48616	0.000648309	4.3217	2	ENSBTAG00000018463
P51122	0.00388679	3.52573	4	ENSBTAG00000012365
P52176	0.000108452	7.77621	1	ENSBTAG00000020676
P52176	0.014785	4.51668	4	ENSBTAG00000020676
P52176	7.07e-06	9.46804	2	ENSBTAG00000020676
P52176	6.95e-05	8.053	3	ENSBTAG00000020676
P54149	0.00159163	5.16098	4	ENSBTAG00000021632
P55052	0.00013344	4.59447	4	ENSBTAG00000047330
P56425	9.06e-09	13.5359	3	ENSBTAG00000003022
P56425	2.64e-08	12.8368	4	ENSBTAG00000003022
P56425	1.7e-08	13.1232	2	ENSBTAG00000003022
P56425	1.6e-06	10.2492	1	ENSBTAG00000003022
P60661	1.95e-07	8.00242	4	ENSBTAG00000010799
P60661	0.00353895	3.77462	3	ENSBTAG00000010799
P61157	1.59e-07	9.05941	4	ENSBTAG00000003401
P61157	0.00425462	4.12963	3	ENSBTAG00000003401
P62157	3.59e-05	8.09987	3	ENSBTAG00000001575
P62157	3.59e-05	8.09987	3	ENSBTAG00000014583
P62157	3.59e-05	8.09987	3	ENSBTAG00000025644
P62157	2.77e-07	11.0012	4	ENSBTAG00000001575
P62157	2.77e-07	11.0012	4	ENSBTAG00000014583
P62157	2.77e-07	11.0012	4	ENSBTAG00000025644
P62261	1.13e-09	8.60689	3	ENSBTAG00000005664
P62261	5.13e-11	9.87588	4	ENSBTAG00000005664
P63048	0.00324974	-6.12316	2	ENSBTAG00000007737
P63103	0.0093533	4.96613	4	ENSBTAG00000000236
P63258	5.61e-06	3.29606	1	ENSBTAG00000006189
P63258	8.53e-11	5.82914	3	ENSBTAG00000006189
P63258	6.91e-09	4.76779	2	ENSBTAG00000006189
P63258	2.39e-11	6.15693	4	ENSBTAG00000006189
P67808	8.18e-14	6.05395	3	ENSBTAG00000017368
P67808	1.07e-14	6.5493	4	ENSBTAG00000017368
P68103	0.00201433	5.27563	3	ENSBTAG00000014534
P68103	7.55e-06	8.42112	4	ENSBTAG00000014534
P79105	4.19e-05	9.04439	4	ENSBTAG00000012638
P79345	0.00477428	-7.74924	3	ENSBTAG00000021955
P80025	0.000316726	-2.45233	4	ENSBTAG00000012780
P80025	0.00264402	-1.97636	3	ENSBTAG00000012780
P80025	0.00383809	-1.88924	2	ENSBTAG00000012780
P80177	0.000200769	4.30654	4	ENSBTAG00000007375
P80195	1.56e-07	-3.58589	3	ENSBTAG00000013417
P80195	0.000976054	-1.92966	1	ENSBTAG00000013417
P80195	3.92e-09	-4.31975	4	ENSBTAG00000013417
P80195	4.78e-05	-2.50524	2	ENSBTAG00000013417
P80724	1.76e-06	9.76995	3	ENSBTAG00000048565
P80724	0.00210505	5.55784	2	ENSBTAG00000048565
P80724	9.89e-07	10.1114	4	ENSBTAG00000048565
P81187	4.31e-09	3.02697	4	ENSBTAG00000046158
P81187	5.98e-06	2.03721	2	ENSBTAG00000046158
P81187	0.000102797	1.66215	1	ENSBTAG00000046158
P81187	1.2e-08	2.88011	3	ENSBTAG00000046158
Q0VBZ9	0.00323562	2.6482	3	ENSBTAG00000046862
Q0VBZ9	1.37e-06	4.97107	4	ENSBTAG00000046862
Q0VCM4	1.09e-09	8.96438	4	ENSBTAG00000011494
Q0VCM4	0.00075341	3.87133	3	ENSBTAG00000011494
Q0VCM5	0.0104139	5.05543	2	ENSBTAG00000007843
Q0VCM5	0.0181639	4.62188	3	ENSBTAG00000007843
Q0VCX2	0.00192999	-6.26389	3	ENSBTAG00000007662
Q0VCX2	0.00211543	-6.19951	2	ENSBTAG00000007662
Q10741	0.0119535	6.26054	4	ENSBTAG00000005481
Q10741	0.0200962	5.74386	3	ENSBTAG00000005481
Q148J6	8.65e-06	8.97511	4	ENSBTAG00000007964
Q148J6	0.0159463	4.28491	3	ENSBTAG00000007964
Q1JPB0	0.000899134	6.51751	3	ENSBTAG00000011975
Q1JPB0	5.34e-05	8.32224	4	ENSBTAG00000011975
Q27975	0.000514935	5.85613	4	ENSBTAG00000025441
Q27975	0.0155708	3.86016	3	ENSBTAG00000025441
Q29437	1e-05	8.7349	3	ENSBTAG00000039321
Q29437	2.58e-05	8.18171	4	ENSBTAG00000039321
Q29437	9.2e-06	8.78352	2	ENSBTAG00000039321
Q29437	0.000204768	6.96475	1	ENSBTAG00000039321
Q29RY4	0.0172006	4.92661	4	ENSBTAG00000005683
Q2HJ49	2.33e-08	10.2341	3	ENSBTAG00000003418
Q2HJ49	2.09e-09	11.5045	4	ENSBTAG00000003418
Q2HJ57	0.00122314	4.17029	4	ENSBTAG00000016315
Q2HJ60	5.78e-07	8.16532	4	ENSBTAG00000005726
Q2HJ81	0.0102946	2.55468	4	ENSBTAG00000046337
Q2KIT0	0.00167464	1.70016	1	ENSBTAG00000026666
Q2KIT0	0.000996025	1.79614	3	ENSBTAG00000026666
Q2KIT0	0.000201163	2.08394	2	ENSBTAG00000026666
Q2KIT0	0.0083291	1.39109	4	ENSBTAG00000026666
Q2KIU3	0.000757961	1.72368	3	ENSBTAG00000018556
Q2KIU3	0.000953264	1.68462	1	ENSBTAG00000018556
Q2KIU3	0.000755362	1.72426	2	ENSBTAG00000018556
Q2KIU3	0.0127802	1.2176	4	ENSBTAG00000018556
Q2KJD0	1.25e-06	5.81675	4	ENSBTAG00000006969
Q2KJF1	0.00225242	1.21197	4	ENSBTAG00000009735
Q2KJF1	4.31e-05	1.73532	3	ENSBTAG00000009735
Q2KJF1	2.94e-05	1.78437	2	ENSBTAG00000009735
Q2KJF1	0.000107615	1.61708	1	ENSBTAG00000009735
Q2KJI3	2.61e-05	7.16259	3	ENSBTAG00000020801
Q2KJI3	5.73e-07	9.12591	4	ENSBTAG00000020801
Q2TA49	1.07e-09	8.58688	4	ENSBTAG00000019604
Q2TA49	1.32e-08	7.62018	3	ENSBTAG00000019604
Q32KV6	0.000879239	-8.19827	3	ENSBTAG00000033747
Q32L76	0.00291826	6.03579	2	ENSBTAG00000002963
Q32L76	0.0165553	4.72869	3	ENSBTAG00000002963
Q32LE5	0.000105333	6.38273	4	ENSBTAG00000006910
Q32LE5	0.0197914	3.52006	3	ENSBTAG00000006910
Q3B7N2	2.48e-07	6.80178	3	ENSBTAG00000018255
Q3B7N2	5.12e-11	10.2208	4	ENSBTAG00000018255
Q3MHL4	2.67e-07	7.81399	4	ENSBTAG00000018101
Q3MHR7	2.89e-09	9.23004	4	ENSBTAG00000010386
Q3MHR7	0.000766446	4.16372	3	ENSBTAG00000010386
Q3SYU2	0.000174951	4.48987	4	ENSBTAG00000004258
Q3SYW2	0.000102972	6.3885	4	ENSBTAG00000007450
Q3SYW2	0.00606859	4.21815	3	ENSBTAG00000007450
Q3SZ62	0.000320512	7.5477	3	ENSBTAG00000012697
Q3SZ62	1.69e-05	9.49684	4	ENSBTAG00000012697
Q3SZI4	4.64e-05	7.10111	4	ENSBTAG00000002108
Q3SZI4	0.000419162	5.92187	3	ENSBTAG00000002108
Q3SZK8	0.00232275	2.98412	3	ENSBTAG00000011382
Q3SZK8	5.72e-06	4.92952	4	ENSBTAG00000011382
Q3T035	0.00664828	5.18131	3	ENSBTAG00000005345
Q3T035	0.000163916	7.64996	4	ENSBTAG00000005345
Q3T0D0	7.88e-05	6.04551	4	ENSBTAG00000021131
Q3T0I4	1.4e-05	4.30475	4	ENSBTAG00000008498
Q3T0P6	0.0111798	8.0257	4	ENSBTAG00000000894
Q3T0Q4	3.37e-07	7.85883	4	ENSBTAG00000047186
Q3T114	8.35e-06	10.4098	3	ENSBTAG00000012595
Q3T114	2.19e-06	11.3308	4	ENSBTAG00000012595
Q3T149	0.002626	3.96064	3	ENSBTAG00000011969
Q3T149	1.84e-07	8.12587	4	ENSBTAG00000011969
Q3ZBD7	0.00248869	5.59723	2	ENSBTAG00000006396
Q3ZBD7	4.53e-07	10.8571	3	ENSBTAG00000006396
Q3ZBD7	0.000124969	6.17597	4	ENSBTAG00000006396
Q3ZBD7	5.69e-08	12.1463	4	ENSBTAG00000006396
Q3ZC66	0.00151129	-12.5731	3	ENSBTAG00000015723
Q3ZC66	0.0194788	-8.89044	4	ENSBTAG00000015723
Q3ZCJ7	9.03e-06	7.99609	4	ENSBTAG00000039992
Q3ZCL8	5.31e-10	9.56851	4	ENSBTAG00000009580
Q3ZCL8	0.000594495	4.09123	2	ENSBTAG00000009580
Q3ZCL8	4.46e-09	8.6679	3	ENSBTAG00000009580
Q58D62	0.00394745	5.97433	3	ENSBTAG00000017531
Q58D62	0.0198921	4.70546	4	ENSBTAG00000017531
Q58DD4	0.00299829	-4.9007	3	ENSBTAG00000014357
Q58DD4	0.00299829	-4.9007	4	ENSBTAG00000014357
Q5E947	1.04e-05	5.82817	4	ENSBTAG00000003642
Q5E9B1	8.01e-05	7.34361	3	ENSBTAG00000019603
Q5E9B1	6.14e-06	8.80979	4	ENSBTAG00000019603
Q5E9C0	0.00466057	2.75772	4	ENSBTAG00000027446
Q5E9F5	0.00343724	3.72346	3	ENSBTAG00000002068
Q5E9F5	4.4e-07	7.51822	4	ENSBTAG00000002068
Q5E9F7	8.62e-08	12.1786	4	ENSBTAG00000021455
Q5E9F7	0.00112532	6.2573	2	ENSBTAG00000021455
Q5E9F7	8.66e-07	10.72	3	ENSBTAG00000021455
Q5E9G3	1.34e-06	5.87962	4	ENSBTAG00000005814
Q6EWQ7	0.000173703	4.27461	4	ENSBTAG00000002018
Q762I5	0.000417304	6.69317	2	ENSBTAG00000004716
Q762I5	7.43e-07	10.5026	3	ENSBTAG00000004716
Q762I5	1.94e-06	9.9233	4	ENSBTAG00000004716
Q76LV1	0.010194	4.61507	3	ENSBTAG00000000778
Q76LV2	9.54e-09	10.8951	4	ENSBTAG00000006270
Q76LV2	1.38e-07	9.50342	3	ENSBTAG00000006270
Q865V6	0.0169933	3.23073	4	ENSBTAG00000005432
Q8MJ50	0.000335416	3.71276	4	ENSBTAG00000002746
Q8SPP7	6.26e-12	14.0609	4	ENSBTAG00000002635
Q8SPP7	4.53e-10	11.6903	1	ENSBTAG00000002635
Q8SPP7	3.72e-11	13.0453	2	ENSBTAG00000002635
Q8SPP7	1.97e-12	14.746	3	ENSBTAG00000002635
Q8SQ24	0.000723753	-11.5649	3	ENSBTAG00000033008
Q8SQ24	0.000723753	-11.5649	4	ENSBTAG00000033008
Q92176	1.57e-05	7.90119	4	ENSBTAG00000008631
Q92176	4.1e-05	7.37975	3	ENSBTAG00000008631
Q9BGI1	1.39e-08	7.76094	3	ENSBTAG00000008648
Q9BGI1	7.52e-10	8.91091	4	ENSBTAG00000008648
Q9GMB8	5.69e-11	6.72931	4	ENSBTAG00000012962
Q9MZ06	0.00680913	-1.70467	3	ENSBTAG00000031497
Q9XSK7	0.000139051	5.57891	3	ENSBTAG00000039793
Q9XSK7	5.37e-08	9.18551	4	ENSBTAG00000039793

## Sheet: UniProt ID to gene name
UniProt ID	FDR-adjusted P-value	logFC	Treatments	external_gene_name
Q2KJF1	0.00225242	1.21197	4	A1BG
Q2KJF1	4.31e-05	1.73532	3	A1BG
Q2KJF1	2.94e-05	1.78437	2	A1BG
Q2KJF1	0.000107615	1.61708	1	A1BG
P63258	5.61e-06	3.29606	1	ACTG1
P63258	8.53e-11	5.82914	3	ACTG1
P63258	6.91e-09	4.76779	2	ACTG1
P63258	2.39e-11	6.15693	4	ACTG1
Q3B7N2	2.48e-07	6.80178	3	ACTN1
Q3B7N2	5.12e-11	10.2208	4	ACTN1
A5D7D1	2.56e-05	9.35666	4	ACTN4
A5D7D1	0.0038029	5.91108	3	ACTN4
P61157	1.59e-07	9.05941	4	ACTR3
P61157	0.00425462	4.12963	3	ACTR3
Q10741	0.0119535	6.26054	4	ADAM10
Q10741	0.0200962	5.74386	3	ADAM10
Q3MHL4	2.67e-07	7.81399	4	AHCY
P08166	0.000204713	4.04032	4	AK2
P09487	0.00338382	3.08083	4	ALPL
Q3T0I4	1.4e-05	4.30475	4	ALYREF
P51122	0.00388679	3.52573	4	ANP32A
P15497	2.95e-05	2.65339	1	APOA1
P15497	1.65e-05	2.76396	3	APOA1
P15497	0.000688699	2.04206	4	APOA1
P15497	4.7e-06	3.00429	2	APOA1
P19035	0.00700333	6.23359	1	APOC3
P19035	0.000765338	8.06365	3	APOC3
P19035	0.0031963	6.9009	2	APOC3
P19035	0.0238946	5.12334	4	APOC3
Q3MHR7	2.89e-09	9.23004	4	ARPC2
Q3MHR7	0.000766446	4.16372	3	ARPC2
Q3T035	0.00664828	5.18131	3	ARPC3
Q3T035	0.000163916	7.64996	4	ARPC3
Q148J6	8.65e-06	8.97511	4	ARPC4
Q148J6	0.0159463	4.28491	3	ARPC4
Q32LE5	0.000105333	6.38273	4	ASRGL1
Q32LE5	0.0197914	3.52006	3	ASRGL1
P08037	0.00192624	-5.66784	2	B4GALT1
P80724	1.76e-06	9.76995	3	BASP1
P80724	0.00210505	5.55784	2	BASP1
P80724	9.89e-07	10.1114	4	BASP1
Q3SYW2	0.000102972	6.3885	4	C2
Q3SYW2	0.00606859	4.21815	3	C2
P62157	3.59e-05	8.09987	3	CALM1
P62157	2.77e-07	11.0012	4	CALM1
P62157	3.59e-05	8.09987	3	CALM2
P62157	2.77e-07	11.0012	4	CALM2
P62157	3.59e-05	8.09987	3	CALM3
P62157	2.77e-07	11.0012	4	CALM3
P56425	9.06e-09	13.5359	3	CAMP
P56425	2.64e-08	12.8368	4	CAMP
P56425	1.7e-08	13.1232	2	CAMP
P56425	1.6e-06	10.2492	1	CAMP
Q865V6	0.0169933	3.23073	4	CAPG
A4FUA8	0.000185668	5.63894	3	CAPZA1
A4FUA8	4.34e-08	9.61609	4	CAPZA1
P19660	1.88e-05	10.7166	4	CATHL2
P19660	0.0057626	6.27835	1	CATHL2
P19660	1.22e-05	11.0387	3	CATHL2
P19660	3.86e-05	10.179	2	CATHL2
P22226	1.4e-10	12.83	3	CATHL3
P22226	2.83e-08	10.0031	1	CATHL3
P22226	7.61e-10	11.8962	2	CATHL3
P22226	4.27e-10	12.2115	4	CATHL3
P33046	1.08e-06	11.3547	2	CATHL4
P33046	8.29e-07	11.5329	4	CATHL4
P33046	3.01e-07	12.2147	3	CATHL4
P33046	0.000265995	7.70114	1	CATHL4
P26201	0.000103282	-6.44679	2	CD36
P26201	0.000103282	-6.44679	3	CD36
P26201	0.000103282	-6.44679	1	CD36
P26201	0.000103282	-6.44679	4	CD36
P81187	4.31e-09	3.02697	4	CFB
P81187	5.98e-06	2.03721	2	CFB
P81187	0.000102797	1.66215	1	CFB
P81187	1.2e-08	2.88011	3	CFB
Q5E9F7	8.62e-08	12.1786	4	CFL1
Q5E9F7	0.00112532	6.2573	2	CFL1
Q5E9F7	8.66e-07	10.72	3	CFL1
P17697	0.0170243	-1.42455	3	CLU
P17697	0.00327738	-1.80158	2	CLU
A4IFB6	3.61e-05	8.33509	2	CNOT10
A4IFB6	0.00328328	5.49666	1	CNOT10
A4IFB6	0.000311413	7.00967	3	CNOT10
A4IFB6	0.00132329	6.09298	4	CNOT10
Q92176	1.57e-05	7.90119	4	CORO1A
Q92176	4.1e-05	7.37975	3	CORO1A
Q2HJ57	0.00122314	4.17029	4	COTL1
Q3ZC66	0.00151129	-12.5731	3	CRIPT
Q3ZC66	0.0194788	-8.89044	4	CRIPT
P01035	0.000593075	-1.46485	4	CST3
P07688	1.35e-06	7.53791	4	CTSB
P25326	2.46e-05	7.05894	3	CTSS
P25326	5.37e-06	7.82146	4	CTSS
Q2KJI3	2.61e-05	7.16259	3	CYRIB
Q2KJI3	5.73e-07	9.12591	4	CYRIB
P68103	0.00201433	5.27563	3	EEF1A1
P68103	7.55e-06	8.42112	4	EEF1A1
Q3SYU2	0.000174951	4.48987	4	EEF2
A5D7A0	7.4e-07	9.26956	3	EFHD2
A5D7A0	9.14e-08	10.4032	4	EFHD2
Q6EWQ7	0.000173703	4.27461	4	EIF5A
Q29RY4	0.0172006	4.92661	4	ELAC1
P31976	0.000119564	7.6299	4	EZR
P31976	0.00155487	6.01021	3	EZR
P10790	1.78e-07	-4.52013	4	FABP3
P10790	8.71e-05	-3.03769	2	FABP3
P10790	3.42e-07	-4.36105	3	FABP3
P10790	0.000324267	-2.72112	1	FABP3
P55052	0.00013344	4.59447	4	FABP5
Q58D62	0.00394745	5.97433	3	FETUB
Q58D62	0.0198921	4.70546	4	FETUB
Q9MZ06	0.00680913	-1.70467	3	FGFBP1
P10096	0.00358276	4.28202	2	GAPDH
P10096	8.57e-09	10.6749	4	GAPDH
P10096	4.3e-07	8.70175	3	GAPDH
P21856	2.07e-09	8.28498	4	GDI1
P21856	0.0107476	2.67299	3	GDI1
P80195	1.56e-07	-3.58589	3	GLYCAM1
P80195	0.000976054	-1.92966	1	GLYCAM1
P80195	3.92e-09	-4.31975	4	GLYCAM1
P80195	4.78e-05	-2.50524	2	GLYCAM1
P33097	0.010577	1.91663	4	GOT1
Q3ZBD7	0.00248869	5.59723	2	GPI
Q3ZBD7	4.53e-07	10.8571	3	GPI
Q3ZBD7	0.000124969	6.17597	4	GPI
Q3ZBD7	5.69e-08	12.1463	4	GPI
Q9XSK7	0.000139051	5.57891	3	HDGF
Q9XSK7	5.37e-08	9.18551	4	HDGF
P10103	0.000412652	7.51555	4	HMGB1
P10103	0.00630739	5.55803	3	HMGB1
P40673	0.00634388	4.11137	3	HMGB2
P40673	9.86e-07	8.57869	4	HMGB2
Q2HJ60	5.78e-07	8.16532	4	HNRNPA2B1
Q3T0D0	7.88e-05	6.04551	4	HNRNPK
Q76LV2	9.54e-09	10.8951	4	HSP90AA1
Q76LV2	1.38e-07	9.50342	3	HSP90AA1
Q76LV1	0.010194	4.61507	3	HSP90AB1
Q27975	0.000514935	5.85613	4	HSPA1A
Q27975	0.0155708	3.86016	3	HSPA1A
Q0VCX2	0.00192999	-6.26389	3	HSPA5
Q0VCX2	0.00211543	-6.19951	2	HSPA5
P19120	9.9e-05	7.63568	4	HSPA8
P19120	0.00293336	5.51203	3	HSPA8
Q3T149	0.002626	3.96064	3	HSPB1
Q3T149	1.84e-07	8.12587	4	HSPB1
Q0VCM5	0.0104139	5.05543	2	ITIH1
Q0VCM5	0.0181639	4.62188	3	ITIH1
P19858	1.37e-12	8.30313	4	LDHA
Q5E9B1	8.01e-05	7.34361	3	LDHB
Q5E9B1	6.14e-06	8.80979	4	LDHB
P11116	1.27e-07	7.31999	4	LGALS1
P11116	0.00457273	3.26635	3	LGALS1
P80025	0.000316726	-2.45233	4	LPO
P80025	0.00264402	-1.97636	3	LPO
P80025	0.00383809	-1.88924	2	LPO
P24627	5.77e-07	2.45018	4	LTF
Q0VBZ9	0.00323562	2.6482	3	MARCKSL1
Q0VBZ9	1.37e-06	4.97107	4	MARCKSL1
P02192	1.06e-05	-1.69545	4	MB
P02192	0.00185939	-1.09592	2	MB
P02192	1.79e-05	-1.63523	3	MB
Q2KIT0	0.00167464	1.70016	1	MGC137014
Q2KIT0	0.000996025	1.79614	3	MGC137014
Q2KIT0	0.000201163	2.08394	2	MGC137014
Q2KIT0	0.0083291	1.39109	4	MGC137014
Q2KIU3	0.000757961	1.72368	3	MGC137211
Q2KIU3	0.000953264	1.68462	1	MGC137211
Q2KIU3	0.000755362	1.72426	2	MGC137211
Q2KIU3	0.0127802	1.2176	4	MGC137211
P80177	0.000200769	4.30654	4	MIF
P52176	0.000108452	7.77621	1	MMP9
P52176	0.014785	4.51668	4	MMP9
P52176	7.07e-06	9.46804	2	MMP9
P52176	6.95e-05	8.053	3	MMP9
Q2HJ49	2.33e-08	10.2341	3	MSN
Q2HJ49	2.09e-09	11.5045	4	MSN
P54149	0.00159163	5.16098	4	MSRA
A4IF97	8.54e-06	6.32711	4	MYL12B
P60661	1.95e-07	8.00242	4	MYL6
P60661	0.00353895	3.77462	3	MYL6
Q8SQ24	0.000723753	-11.5649	3	MYOZ1
Q8SQ24	0.000723753	-11.5649	4	MYOZ1
Q3T0Q4	3.37e-07	7.85883	4	NME2
P79345	0.00477428	-7.74924	3	NPC2
Q8MJ50	0.000335416	3.71276	4	OSTF1
P02754	2.23e-07	-3.61462	3	PAEP
P02754	0.000276251	-2.23419	2	PAEP
P02754	7.57e-09	-4.30143	4	PAEP
P02754	0.00288394	-1.76073	1	PAEP
P13696	0.00213288	-5.18271	3	PEBP1
P13696	0.00177996	-5.28879	1	PEBP1
P13696	0.000234143	-6.44191	2	PEBP1
P02584	3.68e-07	11.8912	4	PFN1
P02584	8.79e-05	8.31107	2	PFN1
P02584	9.99e-07	11.2311	3	PFN1
P02584	0.00336022	5.84674	1	PFN1
Q3SZ62	0.000320512	7.5477	3	PGAM1
Q3SZ62	1.69e-05	9.49684	4	PGAM1
Q3T0P6	0.0111798	8.0257	4	PGK1
Q8SPP7	6.26e-12	14.0609	4	PGLYRP1
Q8SPP7	4.53e-10	11.6903	1	PGLYRP1
Q8SPP7	3.72e-11	13.0453	2	PGLYRP1
Q8SPP7	1.97e-12	14.746	3	PGLYRP1
Q5E947	1.04e-05	5.82817	4	PRDX1
Q9BGI1	1.39e-08	7.76094	3	PRDX5
Q9BGI1	7.52e-10	8.91091	4	PRDX5
O77834	0.00368344	4.33346	3	PRDX6
O77834	2.52e-07	9.10335	4	PRDX6
Q5E9G3	1.34e-06	5.87962	4	PSME2
Q0VCM4	1.09e-09	8.96438	4	PYGL
Q0VCM4	0.00075341	3.87133	3	PYGL
Q762I5	0.000417304	6.69317	2	RETN
Q762I5	7.43e-07	10.5026	3	RETN
Q762I5	1.94e-06	9.9233	4	RETN
Q3T114	8.35e-06	10.4098	3	RIDA
Q3T114	2.19e-06	11.3308	4	RIDA
P42899	7.17e-07	5.566	4	RPLP2
Q5E9C0	0.00466057	2.75772	4	RSU1
P79105	4.19e-05	9.04439	4	S100A12
P28782	0.00398483	4.95169	4	S100A8
Q32L76	0.00291826	6.03579	2	SAA4
Q32L76	0.0165553	4.72869	3	SAA4
Q29437	1e-05	8.7349	3	SAO
Q29437	2.58e-05	8.18171	4	SAO
Q29437	9.2e-06	8.78352	2	SAO
Q29437	0.000204768	6.96475	1	SAO
Q9GMB8	5.69e-11	6.72931	4	SARS1
Q58DD4	0.00299829	-4.9007	3	SDC2
Q58DD4	0.00299829	-4.9007	4	SDC2
A8YXY3	0.00137196	-6.93811	4	SELENOF
A8YXY3	0.00147422	-6.88493	3	SELENOF
Q1JPB0	0.000899134	6.51751	3	SERPINB1
Q1JPB0	5.34e-05	8.32224	4	SERPINB1
P28800	0.00206192	1.61336	4	SERPINF2
P28800	3.88e-05	2.30492	1	SERPINF2
P28800	8.39e-06	2.56408	2	SERPINF2
P28800	6.87e-05	2.20758	3	SERPINF2
Q3ZCL8	5.31e-10	9.56851	4	SH3BGRL3
Q3ZCL8	0.000594495	4.09123	2	SH3BGRL3
Q3ZCL8	4.46e-09	8.6679	3	SH3BGRL3
Q32KV6	0.000879239	-8.19827	3	SIL1
Q3SZK8	0.00232275	2.98412	3	SLC9A3R1
Q3SZK8	5.72e-06	4.92952	4	SLC9A3R1
P29392	0.00012937	-8.35296	3	SPADH1
P29392	0.00012937	-8.35296	4	SPADH1
P29392	0.00812873	-5.39343	2	SPADH1
Q5E9F5	0.00343724	3.72346	3	TAGLN2
Q5E9F5	4.4e-07	7.51822	4	TAGLN2
P21752	0.00235855	8.36504	3	TMSB10
P21752	0.0148924	6.50534	4	TMSB10
O46375	0.00649666	1.15825	2	TTR
O46375	0.00299574	1.27892	1	TTR
Q3ZCJ7	9.03e-06	7.99609	4	TUBA1C
Q2KJD0	1.25e-06	5.81675	4	TUBB
Q2HJ81	0.0102946	2.55468	4	TUBB6
O97680	5.21e-05	7.64126	4	TXN
O97680	0.000619452	6.19604	3	TXN
P63048	0.00324974	-6.12316	2	UBA52
P41541	0.00115615	-8.88178	3	USO1
A5PJS6	0.0200649	-5.48187	4	USP10
Q2TA49	1.07e-09	8.58688	4	VASP
Q2TA49	1.32e-08	7.62018	3	VASP
P48616	8.17e-11	11.0733	3	VIM
P48616	2.19e-05	5.70131	1	VIM
P48616	2.23e-12	12.8821	4	VIM
P48616	0.000648309	4.3217	2	VIM
P67808	8.18e-14	6.05395	3	YBX1
P67808	1.07e-14	6.5493	4	YBX1
P62261	1.13e-09	8.60689	3	YWHAE
P62261	5.13e-11	9.87588	4	YWHAE
Q3SZI4	4.64e-05	7.10111	4	YWHAQ
Q3SZI4	0.000419162	5.92187	3	YWHAQ
P63103	0.0093533	4.96613	4	YWHAZ
A4Z945	0.00079335	7.94712	4	ZBED8
A4Z945	0.000260475	8.81353	3	ZBED8
A4Z945	0.00169699	7.34167	2	ZBED8

## Sheet: UniProt ID to HGNC symbol
UniProt ID	FDR-adjusted P-value	logFC	Treatments	hgnc_symbol
A4FUA8	0.000185668	5.63894	3	NA
A4FUA8	4.34e-08	9.61609	4	NA
A4IF97	8.54e-06	6.32711	4	NA
A4IFB6	3.61e-05	8.33509	2	NA
A4IFB6	0.00328328	5.49666	1	NA
A4IFB6	0.000311413	7.00967	3	NA
A4IFB6	0.00132329	6.09298	4	NA
A4Z945	0.00079335	7.94712	4	NA
A4Z945	0.000260475	8.81353	3	NA
A4Z945	0.00169699	7.34167	2	NA
A5D7A0	7.4e-07	9.26956	3	NA
A5D7A0	9.14e-08	10.4032	4	NA
A5D7D1	2.56e-05	9.35666	4	NA
A5D7D1	0.0038029	5.91108	3	NA
A5PJS6	0.0200649	-5.48187	4	NA
A8YXY3	0.00137196	-6.93811	4	NA
A8YXY3	0.00147422	-6.88493	3	NA
O46375	0.00649666	1.15825	2	NA
O46375	0.00299574	1.27892	1	NA
O77834	0.00368344	4.33346	3	NA
O77834	2.52e-07	9.10335	4	NA
O97680	5.21e-05	7.64126	4	NA
O97680	0.000619452	6.19604	3	NA
P01035	0.000593075	-1.46485	4	NA
P02192	1.06e-05	-1.69545	4	NA
P02192	0.00185939	-1.09592	2	NA
P02192	1.79e-05	-1.63523	3	NA
P02584	3.68e-07	11.8912	4	NA
P02584	8.79e-05	8.31107	2	NA
P02584	9.99e-07	11.2311	3	NA
P02584	0.00336022	5.84674	1	NA
P02754	2.23e-07	-3.61462	3	NA
P02754	0.000276251	-2.23419	2	NA
P02754	7.57e-09	-4.30143	4	NA
P02754	0.00288394	-1.76073	1	NA
P07688	1.35e-06	7.53791	4	NA
P08037	0.00192624	-5.66784	2	NA
P08166	0.000204713	4.04032	4	NA
P09487	0.00338382	3.08083	4	NA
P10096	0.00358276	4.28202	2	NA
P10096	8.57e-09	10.6749	4	NA
P10096	4.3e-07	8.70175	3	NA
P10103	0.000412652	7.51555	4	NA
P10103	0.00630739	5.55803	3	NA
P10790	1.78e-07	-4.52013	4	NA
P10790	8.71e-05	-3.03769	2	NA
P10790	3.42e-07	-4.36105	3	NA
P10790	0.000324267	-2.72112	1	NA
P11116	1.27e-07	7.31999	4	NA
P11116	0.00457273	3.26635	3	NA
P13696	0.00213288	-5.18271	3	NA
P13696	0.00177996	-5.28879	1	NA
P13696	0.000234143	-6.44191	2	NA
P15497	2.95e-05	2.65339	1	NA
P15497	1.65e-05	2.76396	3	NA
P15497	0.000688699	2.04206	4	NA
P15497	4.7e-06	3.00429	2	NA
P17697	0.0170243	-1.42455	3	NA
P17697	0.00327738	-1.80158	2	NA
P19035	0.00700333	6.23359	1	NA
P19035	0.000765338	8.06365	3	NA
P19035	0.0031963	6.9009	2	NA
P19035	0.0238946	5.12334	4	NA
P19120	9.9e-05	7.63568	4	NA
P19120	0.00293336	5.51203	3	NA
P19660	1.88e-05	10.7166	4	NA
P19660	0.0057626	6.27835	1	NA
P19660	1.22e-05	11.0387	3	NA
P19660	3.86e-05	10.179	2	NA
P19858	1.37e-12	8.30313	4	NA
P21752	0.00235855	8.36504	3	NA
P21752	0.0148924	6.50534	4	NA
P21856	2.07e-09	8.28498	4	NA
P21856	0.0107476	2.67299	3	NA
P22226	1.4e-10	12.83	3	NA
P22226	2.83e-08	10.0031	1	NA
P22226	7.61e-10	11.8962	2	NA
P22226	4.27e-10	12.2115	4	NA
P24627	5.77e-07	2.45018	4	NA
P25326	2.46e-05	7.05894	3	NA
P25326	5.37e-06	7.82146	4	NA
P26201	0.000103282	-6.44679	2	NA
P26201	0.000103282	-6.44679	3	NA
P26201	0.000103282	-6.44679	1	NA
P26201	0.000103282	-6.44679	4	NA
P28782	0.00398483	4.95169	4	NA
P28800	0.00206192	1.61336	4	NA
P28800	3.88e-05	2.30492	1	NA
P28800	8.39e-06	2.56408	2	NA
P28800	6.87e-05	2.20758	3	NA
P29392	0.00012937	-8.35296	3	NA
P29392	0.00012937	-8.35296	4	NA
P29392	0.00812873	-5.39343	2	NA
P31976	0.000119564	7.6299	4	NA
P31976	0.00155487	6.01021	3	NA
P33046	1.08e-06	11.3547	2	NA
P33046	8.29e-07	11.5329	4	NA
P33046	3.01e-07	12.2147	3	NA
P33046	0.000265995	7.70114	1	NA
P33097	0.010577	1.91663	4	NA
P40673	0.00634388	4.11137	3	NA
P40673	9.86e-07	8.57869	4	NA
P41541	0.00115615	-8.88178	3	NA
P42899	7.17e-07	5.566	4	NA
P48616	8.17e-11	11.0733	3	NA
P48616	2.19e-05	5.70131	1	NA
P48616	2.23e-12	12.8821	4	NA
P48616	0.000648309	4.3217	2	NA
P51122	0.00388679	3.52573	4	NA
P52176	0.000108452	7.77621	1	NA
P52176	0.014785	4.51668	4	NA
P52176	7.07e-06	9.46804	2	NA
P52176	6.95e-05	8.053	3	NA
P54149	0.00159163	5.16098	4	NA
P55052	0.00013344	4.59447	4	NA
P56425	9.06e-09	13.5359	3	NA
P56425	2.64e-08	12.8368	4	NA
P56425	1.7e-08	13.1232	2	NA
P56425	1.6e-06	10.2492	1	NA
P60661	1.95e-07	8.00242	4	NA
P60661	0.00353895	3.77462	3	NA
P61157	1.59e-07	9.05941	4	NA
P61157	0.00425462	4.12963	3	NA
P62157	3.59e-05	8.09987	3	NA
P62157	2.77e-07	11.0012	4	NA
P62261	1.13e-09	8.60689	3	NA
P62261	5.13e-11	9.87588	4	NA
P63048	0.00324974	-6.12316	2	NA
P63103	0.0093533	4.96613	4	NA
P63258	5.61e-06	3.29606	1	NA
P63258	8.53e-11	5.82914	3	NA
P63258	6.91e-09	4.76779	2	NA
P63258	2.39e-11	6.15693	4	NA
P67808	8.18e-14	6.05395	3	NA
P67808	1.07e-14	6.5493	4	NA
P68103	0.00201433	5.27563	3	NA
P68103	7.55e-06	8.42112	4	NA
P79105	4.19e-05	9.04439	4	NA
P79345	0.00477428	-7.74924	3	NA
P80025	0.000316726	-2.45233	4	NA
P80025	0.00264402	-1.97636	3	NA
P80025	0.00383809	-1.88924	2	NA
P80177	0.000200769	4.30654	4	NA
P80195	1.56e-07	-3.58589	3	NA
P80195	0.000976054	-1.92966	1	NA
P80195	3.92e-09	-4.31975	4	NA
P80195	4.78e-05	-2.50524	2	NA
P80724	1.76e-06	9.76995	3	NA
P80724	0.00210505	5.55784	2	NA
P80724	9.89e-07	10.1114	4	NA
P81187	4.31e-09	3.02697	4	NA
P81187	5.98e-06	2.03721	2	NA
P81187	0.000102797	1.66215	1	NA
P81187	1.2e-08	2.88011	3	NA
Q0VBZ9	0.00323562	2.6482	3	NA
Q0VBZ9	1.37e-06	4.97107	4	NA
Q0VCM4	1.09e-09	8.96438	4	NA
Q0VCM4	0.00075341	3.87133	3	NA
Q0VCM5	0.0104139	5.05543	2	NA
Q0VCM5	0.0181639	4.62188	3	NA
Q0VCX2	0.00192999	-6.26389	3	NA
Q0VCX2	0.00211543	-6.19951	2	NA
Q10741	0.0119535	6.26054	4	NA
Q10741	0.0200962	5.74386	3	NA
Q148J6	8.65e-06	8.97511	4	NA
Q148J6	0.0159463	4.28491	3	NA
Q1JPB0	0.000899134	6.51751	3	NA
Q1JPB0	5.34e-05	8.32224	4	NA
Q27975	0.000514935	5.85613	4	NA
Q27975	0.0155708	3.86016	3	NA
Q29437	1e-05	8.7349	3	NA
Q29437	2.58e-05	8.18171	4	NA
Q29437	9.2e-06	8.78352	2	NA
Q29437	0.000204768	6.96475	1	NA
Q29RY4	0.0172006	4.92661	4	NA
Q2HJ49	2.33e-08	10.2341	3	NA
Q2HJ49	2.09e-09	11.5045	4	NA
Q2HJ57	0.00122314	4.17029	4	NA
Q2HJ60	5.78e-07	8.16532	4	NA
Q2HJ81	0.0102946	2.55468	4	NA
Q2KIT0	0.00167464	1.70016	1	NA
Q2KIT0	0.000996025	1.79614	3	NA
Q2KIT0	0.000201163	2.08394	2	NA
Q2KIT0	0.0083291	1.39109	4	NA
Q2KIU3	0.000757961	1.72368	3	NA
Q2KIU3	0.000953264	1.68462	1	NA
Q2KIU3	0.000755362	1.72426	2	NA
Q2KIU3	0.0127802	1.2176	4	NA
Q2KJD0	1.25e-06	5.81675	4	NA
Q2KJF1	0.00225242	1.21197	4	NA
Q2KJF1	4.31e-05	1.73532	3	NA
Q2KJF1	2.94e-05	1.78437	2	NA
Q2KJF1	0.000107615	1.61708	1	NA
Q2KJI3	2.61e-05	7.16259	3	NA
Q2KJI3	5.73e-07	9.12591	4	NA
Q2TA49	1.07e-09	8.58688	4	NA
Q2TA49	1.32e-08	7.62018	3	NA
Q32KV6	0.000879239	-8.19827	3	NA
Q32L76	0.00291826	6.03579	2	NA
Q32L76	0.0165553	4.72869	3	NA
Q32LE5	0.000105333	6.38273	4	NA
Q32LE5	0.0197914	3.52006	3	NA
Q3B7N2	2.48e-07	6.80178	3	NA
Q3B7N2	5.12e-11	10.2208	4	NA
Q3MHL4	2.67e-07	7.81399	4	NA
Q3MHR7	2.89e-09	9.23004	4	NA
Q3MHR7	0.000766446	4.16372	3	NA
Q3SYU2	0.000174951	4.48987	4	NA
Q3SYW2	0.000102972	6.3885	4	NA
Q3SYW2	0.00606859	4.21815	3	NA
Q3SZ62	0.000320512	7.5477	3	NA
Q3SZ62	1.69e-05	9.49684	4	NA
Q3SZI4	4.64e-05	7.10111	4	NA
Q3SZI4	0.000419162	5.92187	3	NA
Q3SZK8	0.00232275	2.98412	3	NA
Q3SZK8	5.72e-06	4.92952	4	NA
Q3T035	0.00664828	5.18131	3	NA
Q3T035	0.000163916	7.64996	4	NA
Q3T0D0	7.88e-05	6.04551	4	NA
Q3T0I4	1.4e-05	4.30475	4	NA
Q3T0P6	0.0111798	8.0257	4	NA
Q3T0Q4	3.37e-07	7.85883	4	NA
Q3T114	8.35e-06	10.4098	3	NA
Q3T114	2.19e-06	11.3308	4	NA
Q3T149	0.002626	3.96064	3	NA
Q3T149	1.84e-07	8.12587	4	NA
Q3ZBD7	0.00248869	5.59723	2	NA
Q3ZBD7	4.53e-07	10.8571	3	NA
Q3ZBD7	0.000124969	6.17597	4	NA
Q3ZBD7	5.69e-08	12.1463	4	NA
Q3ZC66	0.00151129	-12.5731	3	NA
Q3ZC66	0.0194788	-8.89044	4	NA
Q3ZCJ7	9.03e-06	7.99609	4	NA
Q3ZCL8	5.31e-10	9.56851	4	NA
Q3ZCL8	0.000594495	4.09123	2	NA
Q3ZCL8	4.46e-09	8.6679	3	NA
Q58D62	0.00394745	5.97433	3	NA
Q58D62	0.0198921	4.70546	4	NA
Q58DD4	0.00299829	-4.9007	3	NA
Q58DD4	0.00299829	-4.9007	4	NA
Q5E947	1.04e-05	5.82817	4	NA
Q5E9B1	8.01e-05	7.34361	3	NA
Q5E9B1	6.14e-06	8.80979	4	NA
Q5E9C0	0.00466057	2.75772	4	NA
Q5E9F5	0.00343724	3.72346	3	NA
Q5E9F5	4.4e-07	7.51822	4	NA
Q5E9F7	8.62e-08	12.1786	4	NA
Q5E9F7	0.00112532	6.2573	2	NA
Q5E9F7	8.66e-07	10.72	3	NA
Q5E9G3	1.34e-06	5.87962	4	NA
Q6EWQ7	0.000173703	4.27461	4	NA
Q762I5	0.000417304	6.69317	2	NA
Q762I5	7.43e-07	10.5026	3	NA
Q762I5	1.94e-06	9.9233	4	NA
Q76LV1	0.010194	4.61507	3	NA
Q76LV2	9.54e-09	10.8951	4	NA
Q76LV2	1.38e-07	9.50342	3	NA
Q865V6	0.0169933	3.23073	4	NA
Q8MJ50	0.000335416	3.71276	4	NA
Q8SPP7	6.26e-12	14.0609	4	NA
Q8SPP7	4.53e-10	11.6903	1	NA
Q8SPP7	3.72e-11	13.0453	2	NA
Q8SPP7	1.97e-12	14.746	3	NA
Q8SQ24	0.000723753	-11.5649	3	NA
Q8SQ24	0.000723753	-11.5649	4	NA
Q92176	1.57e-05	7.90119	4	NA
Q92176	4.1e-05	7.37975	3	NA
Q9BGI1	1.39e-08	7.76094	3	NA
Q9BGI1	7.52e-10	8.91091	4	NA
Q9GMB8	5.69e-11	6.72931	4	NA
Q9MZ06	0.00680913	-1.70467	3	NA
Q9XSK7	0.000139051	5.57891	3	NA
Q9XSK7	5.37e-08	9.18551	4	NA

## Sheet: UniProt ID to gene description
UniProt ID	FDR-adjusted P-value	logFC	Treatments	description
Q2KIU3	0.000757961	1.72368	3	2 [Source:NCBI gene (formerly Entrezgene);Acc:511239]
Q2KIU3	0.000953264	1.68462	1	2 [Source:NCBI gene (formerly Entrezgene);Acc:511239]
Q2KIU3	0.000755362	1.72426	2	2 [Source:NCBI gene (formerly Entrezgene);Acc:511239]
Q2KIU3	0.0127802	1.2176	4	2 [Source:NCBI gene (formerly Entrezgene);Acc:511239]
P51122	0.00388679	3.52573	4	acidic nuclear phosphoprotein 32 family member A [Source:NCBI gene (formerly Entrezgene);Acc:538427]
P63258	5.61e-06	3.29606	1	actin gamma 1 [Source:NCBI gene (formerly Entrezgene);Acc:404122]
P63258	8.53e-11	5.82914	3	actin gamma 1 [Source:NCBI gene (formerly Entrezgene);Acc:404122]
P63258	6.91e-09	4.76779	2	actin gamma 1 [Source:NCBI gene (formerly Entrezgene);Acc:404122]
P63258	2.39e-11	6.15693	4	actin gamma 1 [Source:NCBI gene (formerly Entrezgene);Acc:404122]
Q3MHR7	2.89e-09	9.23004	4	actin related protein 2/3 complex subunit 2 [Source:VGNC Symbol;Acc:VGNC:55326]
Q3MHR7	0.000766446	4.16372	3	actin related protein 2/3 complex subunit 2 [Source:VGNC Symbol;Acc:VGNC:55326]
Q3T035	0.00664828	5.18131	3	actin related protein 2/3 complex subunit 3 [Source:VGNC Symbol;Acc:VGNC:53890]
Q3T035	0.000163916	7.64996	4	actin related protein 2/3 complex subunit 3 [Source:VGNC Symbol;Acc:VGNC:53890]
Q148J6	8.65e-06	8.97511	4	actin related protein 2/3 complex subunit 4 [Source:NCBI gene (formerly Entrezgene);Acc:539459]
Q148J6	0.0159463	4.28491	3	actin related protein 2/3 complex subunit 4 [Source:NCBI gene (formerly Entrezgene);Acc:539459]
P61157	1.59e-07	9.05941	4	actin related protein 3 [Source:VGNC Symbol;Acc:VGNC:50033]
P61157	0.00425462	4.12963	3	actin related protein 3 [Source:VGNC Symbol;Acc:VGNC:50033]
Q3B7N2	2.48e-07	6.80178	3	actinin alpha 1 [Source:VGNC Symbol;Acc:VGNC:25581]
Q3B7N2	5.12e-11	10.2208	4	actinin alpha 1 [Source:VGNC Symbol;Acc:VGNC:25581]
A5D7D1	2.56e-05	9.35666	4	actinin alpha 4 [Source:VGNC Symbol;Acc:VGNC:25583]
A5D7D1	0.0038029	5.91108	3	actinin alpha 4 [Source:VGNC Symbol;Acc:VGNC:25583]
Q10741	0.0119535	6.26054	4	ADAM metallopeptidase domain 10 [Source:VGNC Symbol;Acc:VGNC:25604]
Q10741	0.0200962	5.74386	3	ADAM metallopeptidase domain 10 [Source:VGNC Symbol;Acc:VGNC:25604]
Q3MHL4	2.67e-07	7.81399	4	adenosylhomocysteinase [Source:VGNC Symbol;Acc:VGNC:25750]
P08166	0.000204713	4.04032	4	adenylate kinase 2 [Source:VGNC Symbol;Acc:VGNC:25771]
P09487	0.00338382	3.08083	4	alkaline phosphatase, biomineralization associated [Source:VGNC Symbol;Acc:VGNC:25850]
Q2KJF1	0.00225242	1.21197	4	alpha-1-B glycoprotein [Source:VGNC Symbol;Acc:VGNC:25433]
Q2KJF1	4.31e-05	1.73532	3	alpha-1-B glycoprotein [Source:VGNC Symbol;Acc:VGNC:25433]
Q2KJF1	2.94e-05	1.78437	2	alpha-1-B glycoprotein [Source:VGNC Symbol;Acc:VGNC:25433]
Q2KJF1	0.000107615	1.61708	1	alpha-1-B glycoprotein [Source:VGNC Symbol;Acc:VGNC:25433]
Q3T0I4	1.4e-05	4.30475	4	Aly/REF export factor [Source:VGNC Symbol;Acc:VGNC:25855]
Q29437	1e-05	8.7349	3	amine oxidase, copper containing 3 [Source:NCBI gene (formerly Entrezgene);Acc:789307]
Q29437	2.58e-05	8.18171	4	amine oxidase, copper containing 3 [Source:NCBI gene (formerly Entrezgene);Acc:789307]
Q29437	9.2e-06	8.78352	2	amine oxidase, copper containing 3 [Source:NCBI gene (formerly Entrezgene);Acc:789307]
Q29437	0.000204768	6.96475	1	amine oxidase, copper containing 3 [Source:NCBI gene (formerly Entrezgene);Acc:789307]
P15497	2.95e-05	2.65339	1	apolipoprotein A1 [Source:VGNC Symbol;Acc:VGNC:26022]
P15497	1.65e-05	2.76396	3	apolipoprotein A1 [Source:VGNC Symbol;Acc:VGNC:26022]
P15497	0.000688699	2.04206	4	apolipoprotein A1 [Source:VGNC Symbol;Acc:VGNC:26022]
P15497	4.7e-06	3.00429	2	apolipoprotein A1 [Source:VGNC Symbol;Acc:VGNC:26022]
P19035	0.00700333	6.23359	1	apolipoprotein C3 [Source:VGNC Symbol;Acc:VGNC:56243]
P19035	0.000765338	8.06365	3	apolipoprotein C3 [Source:VGNC Symbol;Acc:VGNC:56243]
P19035	0.0031963	6.9009	2	apolipoprotein C3 [Source:VGNC Symbol;Acc:VGNC:56243]
P19035	0.0238946	5.12334	4	apolipoprotein C3 [Source:VGNC Symbol;Acc:VGNC:56243]
Q32LE5	0.000105333	6.38273	4	asparaginase and isoaspartyl peptidase 1 [Source:VGNC Symbol;Acc:VGNC:26223]
Q32LE5	0.0197914	3.52006	3	asparaginase and isoaspartyl peptidase 1 [Source:VGNC Symbol;Acc:VGNC:26223]
P08037	0.00192624	-5.66784	2	beta-1,4-galactosyltransferase 1 [Source:VGNC Symbol;Acc:VGNC:26388]
P80724	1.76e-06	9.76995	3	brain abundant membrane attached signal protein 1 [Source:NCBI gene (formerly Entrezgene);Acc:286842]
P80724	0.00210505	5.55784	2	brain abundant membrane attached signal protein 1 [Source:NCBI gene (formerly Entrezgene);Acc:286842]
P80724	9.89e-07	10.1114	4	brain abundant membrane attached signal protein 1 [Source:NCBI gene (formerly Entrezgene);Acc:286842]
P62157	3.59e-05	8.09987	3	calmodulin 1 [Source:NCBI gene (formerly Entrezgene);Acc:617095]
P62157	2.77e-07	11.0012	4	calmodulin 1 [Source:NCBI gene (formerly Entrezgene);Acc:617095]
P62157	3.59e-05	8.09987	3	calmodulin 2 [Source:NCBI gene (formerly Entrezgene);Acc:100297344]
P62157	2.77e-07	11.0012	4	calmodulin 2 [Source:NCBI gene (formerly Entrezgene);Acc:100297344]
P62157	3.59e-05	8.09987	3	calmodulin 3 [Source:NCBI gene (formerly Entrezgene);Acc:520277]
P62157	2.77e-07	11.0012	4	calmodulin 3 [Source:NCBI gene (formerly Entrezgene);Acc:520277]
A4FUA8	0.000185668	5.63894	3	capping actin protein of muscle Z-line subunit alpha 1 [Source:VGNC Symbol;Acc:VGNC:26756]
A4FUA8	4.34e-08	9.61609	4	capping actin protein of muscle Z-line subunit alpha 1 [Source:VGNC Symbol;Acc:VGNC:26756]
Q865V6	0.0169933	3.23073	4	capping actin protein, gelsolin like [Source:VGNC Symbol;Acc:VGNC:26739]
P22226	1.4e-10	12.83	3	cathelicidin 1 [Source:NCBI gene (formerly Entrezgene);Acc:282164]
P22226	2.83e-08	10.0031	1	cathelicidin 1 [Source:NCBI gene (formerly Entrezgene);Acc:282164]
P22226	7.61e-10	11.8962	2	cathelicidin 1 [Source:NCBI gene (formerly Entrezgene);Acc:282164]
P22226	4.27e-10	12.2115	4	cathelicidin 1 [Source:NCBI gene (formerly Entrezgene);Acc:282164]
P19660	1.88e-05	10.7166	4	cathelicidin 2 [Source:NCBI gene (formerly Entrezgene);Acc:282165]
P19660	0.0057626	6.27835	1	cathelicidin 2 [Source:NCBI gene (formerly Entrezgene);Acc:282165]
P19660	1.22e-05	11.0387	3	cathelicidin 2 [Source:NCBI gene (formerly Entrezgene);Acc:282165]
P19660	3.86e-05	10.179	2	cathelicidin 2 [Source:NCBI gene (formerly Entrezgene);Acc:282165]
P33046	1.08e-06	11.3547	2	cathelicidin 4 [Source:NCBI gene (formerly Entrezgene);Acc:282166]
P33046	8.29e-07	11.5329	4	cathelicidin 4 [Source:NCBI gene (formerly Entrezgene);Acc:282166]
P33046	3.01e-07	12.2147	3	cathelicidin 4 [Source:NCBI gene (formerly Entrezgene);Acc:282166]
P33046	0.000265995	7.70114	1	cathelicidin 4 [Source:NCBI gene (formerly Entrezgene);Acc:282166]
P56425	9.06e-09	13.5359	3	cathelicidin antimicrobial peptide [Source:NCBI gene (formerly Entrezgene);Acc:317650]
P56425	2.64e-08	12.8368	4	cathelicidin antimicrobial peptide [Source:NCBI gene (formerly Entrezgene);Acc:317650]
P56425	1.7e-08	13.1232	2	cathelicidin antimicrobial peptide [Source:NCBI gene (formerly Entrezgene);Acc:317650]
P56425	1.6e-06	10.2492	1	cathelicidin antimicrobial peptide [Source:NCBI gene (formerly Entrezgene);Acc:317650]
P07688	1.35e-06	7.53791	4	cathepsin B [Source:VGNC Symbol;Acc:VGNC:27813]
P25326	2.46e-05	7.05894	3	cathepsin S [Source:VGNC Symbol;Acc:VGNC:27818]
P25326	5.37e-06	7.82146	4	cathepsin S [Source:VGNC Symbol;Acc:VGNC:27818]
A4IFB6	3.61e-05	8.33509	2	CCR4-NOT transcription complex subunit 10 [Source:VGNC Symbol;Acc:VGNC:27515]
A4IFB6	0.00328328	5.49666	1	CCR4-NOT transcription complex subunit 10 [Source:VGNC Symbol;Acc:VGNC:27515]
A4IFB6	0.000311413	7.00967	3	CCR4-NOT transcription complex subunit 10 [Source:VGNC Symbol;Acc:VGNC:27515]
A4IFB6	0.00132329	6.09298	4	CCR4-NOT transcription complex subunit 10 [Source:VGNC Symbol;Acc:VGNC:27515]
P26201	0.000103282	-6.44679	2	CD36 molecule [Source:NCBI gene (formerly Entrezgene);Acc:281052]
P26201	0.000103282	-6.44679	3	CD36 molecule [Source:NCBI gene (formerly Entrezgene);Acc:281052]
P26201	0.000103282	-6.44679	1	CD36 molecule [Source:NCBI gene (formerly Entrezgene);Acc:281052]
P26201	0.000103282	-6.44679	4	CD36 molecule [Source:NCBI gene (formerly Entrezgene);Acc:281052]
P17697	0.0170243	-1.42455	3	clusterin [Source:NCBI gene (formerly Entrezgene);Acc:280750]
P17697	0.00327738	-1.80158	2	clusterin [Source:NCBI gene (formerly Entrezgene);Acc:280750]
Q2HJ57	0.00122314	4.17029	4	coactosin like F-actin binding protein 1 [Source:VGNC Symbol;Acc:VGNC:27626]
Q5E9F7	8.62e-08	12.1786	4	cofilin 1 [Source:VGNC Symbol;Acc:VGNC:27253]
Q5E9F7	0.00112532	6.2573	2	cofilin 1 [Source:VGNC Symbol;Acc:VGNC:27253]
Q5E9F7	8.66e-07	10.72	3	cofilin 1 [Source:VGNC Symbol;Acc:VGNC:27253]
Q3SYW2	0.000102972	6.3885	4	complement C2 [Source:VGNC Symbol;Acc:VGNC:53959]
Q3SYW2	0.00606859	4.21815	3	complement C2 [Source:VGNC Symbol;Acc:VGNC:53959]
P81187	4.31e-09	3.02697	4	complement factor B [Source:NCBI gene (formerly Entrezgene);Acc:514076]
P81187	5.98e-06	2.03721	2	complement factor B [Source:NCBI gene (formerly Entrezgene);Acc:514076]
P81187	0.000102797	1.66215	1	complement factor B [Source:NCBI gene (formerly Entrezgene);Acc:514076]
P81187	1.2e-08	2.88011	3	complement factor B [Source:NCBI gene (formerly Entrezgene);Acc:514076]
Q92176	1.57e-05	7.90119	4	coronin 1A [Source:VGNC Symbol;Acc:VGNC:27620]
Q92176	4.1e-05	7.37975	3	coronin 1A [Source:VGNC Symbol;Acc:VGNC:27620]
Q3ZC66	0.00151129	-12.5731	3	CXXC repeat containing interactor of PDZ3 domain [Source:VGNC Symbol;Acc:VGNC:27712]
Q3ZC66	0.0194788	-8.89044	4	CXXC repeat containing interactor of PDZ3 domain [Source:VGNC Symbol;Acc:VGNC:27712]
Q2KJI3	2.61e-05	7.16259	3	CYFIP related Rac1 interactor B [Source:VGNC Symbol;Acc:VGNC:28819]
Q2KJI3	5.73e-07	9.12591	4	CYFIP related Rac1 interactor B [Source:VGNC Symbol;Acc:VGNC:28819]
P01035	0.000593075	-1.46485	4	cystatin C [Source:NCBI gene (formerly Entrezgene);Acc:281102]
A5D7A0	7.4e-07	9.26956	3	EF-hand domain family member D2 [Source:VGNC Symbol;Acc:VGNC:28353]
A5D7A0	9.14e-08	10.4032	4	EF-hand domain family member D2 [Source:VGNC Symbol;Acc:VGNC:28353]
Q29RY4	0.0172006	4.92661	4	elaC ribonuclease Z 1 [Source:VGNC Symbol;Acc:VGNC:97267]
P68103	0.00201433	5.27563	3	eukaryotic translation elongation factor 1 alpha 1 [Source:VGNC Symbol;Acc:VGNC:56362]
P68103	7.55e-06	8.42112	4	eukaryotic translation elongation factor 1 alpha 1 [Source:VGNC Symbol;Acc:VGNC:56362]
Q3SYU2	0.000174951	4.48987	4	eukaryotic translation elongation factor 2 [Source:VGNC Symbol;Acc:VGNC:28335]
Q6EWQ7	0.000173703	4.27461	4	eukaryotic translation initiation factor 5A [Source:NCBI gene (formerly Entrezgene);Acc:444990]
P31976	0.000119564	7.6299	4	ezrin [Source:VGNC Symbol;Acc:VGNC:28676]
P31976	0.00155487	6.01021	3	ezrin [Source:VGNC Symbol;Acc:VGNC:28676]
P10790	1.78e-07	-4.52013	4	fatty acid binding protein 3 [Source:VGNC Symbol;Acc:VGNC:28697]
P10790	8.71e-05	-3.03769	2	fatty acid binding protein 3 [Source:VGNC Symbol;Acc:VGNC:28697]
P10790	3.42e-07	-4.36105	3	fatty acid binding protein 3 [Source:VGNC Symbol;Acc:VGNC:28697]
P10790	0.000324267	-2.72112	1	fatty acid binding protein 3 [Source:VGNC Symbol;Acc:VGNC:28697]
P55052	0.00013344	4.59447	4	fatty acid binding protein 5 [Source:NCBI gene (formerly Entrezgene);Acc:281760]
Q58D62	0.00394745	5.97433	3	fetuin B [Source:VGNC Symbol;Acc:VGNC:28955]
Q58D62	0.0198921	4.70546	4	fetuin B [Source:VGNC Symbol;Acc:VGNC:28955]
Q9MZ06	0.00680913	-1.70467	3	fibroblast growth factor binding protein 1 [Source:NCBI gene (formerly Entrezgene);Acc:281812]
P11116	1.27e-07	7.31999	4	galectin 1 [Source:VGNC Symbol;Acc:VGNC:30850]
P11116	0.00457273	3.26635	3	galectin 1 [Source:VGNC Symbol;Acc:VGNC:30850]
P21856	2.07e-09	8.28498	4	GDP dissociation inhibitor 1 [Source:VGNC Symbol;Acc:VGNC:29307]
P21856	0.0107476	2.67299	3	GDP dissociation inhibitor 1 [Source:VGNC Symbol;Acc:VGNC:29307]
Q3ZBD7	0.00248869	5.59723	2	glucose-6-phosphate isomerase [Source:VGNC Symbol;Acc:VGNC:29534]
Q3ZBD7	4.53e-07	10.8571	3	glucose-6-phosphate isomerase [Source:VGNC Symbol;Acc:VGNC:29534]
Q3ZBD7	0.000124969	6.17597	4	glucose-6-phosphate isomerase [Source:VGNC Symbol;Acc:VGNC:29534]
Q3ZBD7	5.69e-08	12.1463	4	glucose-6-phosphate isomerase [Source:VGNC Symbol;Acc:VGNC:29534]
P33097	0.010577	1.91663	4	glutamic-oxaloacetic transaminase 1 [Source:VGNC Symbol;Acc:VGNC:29501]
P10096	0.00358276	4.28202	2	glyceraldehyde-3-phosphate dehydrogenase [Source:VGNC Symbol;Acc:VGNC:97273]
P10096	8.57e-09	10.6749	4	glyceraldehyde-3-phosphate dehydrogenase [Source:VGNC Symbol;Acc:VGNC:97273]
P10096	4.3e-07	8.70175	3	glyceraldehyde-3-phosphate dehydrogenase [Source:VGNC Symbol;Acc:VGNC:97273]
Q0VCM4	1.09e-09	8.96438	4	glycogen phosphorylase L [Source:VGNC Symbol;Acc:VGNC:33588]
Q0VCM4	0.00075341	3.87133	3	glycogen phosphorylase L [Source:VGNC Symbol;Acc:VGNC:33588]
P80195	1.56e-07	-3.58589	3	glycosylation-dependent cell adhesion molecule 1 [Source:NCBI gene (formerly Entrezgene);Acc:282430]
P80195	0.000976054	-1.92966	1	glycosylation-dependent cell adhesion molecule 1 [Source:NCBI gene (formerly Entrezgene);Acc:282430]
P80195	3.92e-09	-4.31975	4	glycosylation-dependent cell adhesion molecule 1 [Source:NCBI gene (formerly Entrezgene);Acc:282430]
P80195	4.78e-05	-2.50524	2	glycosylation-dependent cell adhesion molecule 1 [Source:NCBI gene (formerly Entrezgene);Acc:282430]
Q76LV2	9.54e-09	10.8951	4	heat shock protein 90 alpha family class A member 1 [Source:VGNC Symbol;Acc:VGNC:53940]
Q76LV2	1.38e-07	9.50342	3	heat shock protein 90 alpha family class A member 1 [Source:VGNC Symbol;Acc:VGNC:53940]
Q76LV1	0.010194	4.61507	3	heat shock protein 90 alpha family class B member 1 [Source:VGNC Symbol;Acc:VGNC:55918]
Q27975	0.000514935	5.85613	4	heat shock protein family A (Hsp70) member 1A [Source:NCBI gene (formerly Entrezgene);Acc:282254]
Q27975	0.0155708	3.86016	3	heat shock protein family A (Hsp70) member 1A [Source:NCBI gene (formerly Entrezgene);Acc:282254]
Q0VCX2	0.00192999	-6.26389	3	heat shock protein family A (Hsp70) member 5 [Source:VGNC Symbol;Acc:VGNC:59220]
Q0VCX2	0.00211543	-6.19951	2	heat shock protein family A (Hsp70) member 5 [Source:VGNC Symbol;Acc:VGNC:59220]
P19120	9.9e-05	7.63568	4	heat shock protein family A (Hsp70) member 8 [Source:VGNC Symbol;Acc:VGNC:54632]
P19120	0.00293336	5.51203	3	heat shock protein family A (Hsp70) member 8 [Source:VGNC Symbol;Acc:VGNC:54632]
Q3T149	0.002626	3.96064	3	heat shock protein family B (small) member 1 [Source:NCBI gene (formerly Entrezgene);Acc:516099]
Q3T149	1.84e-07	8.12587	4	heat shock protein family B (small) member 1 [Source:NCBI gene (formerly Entrezgene);Acc:516099]
Q9XSK7	0.000139051	5.57891	3	heparin binding growth factor [Source:VGNC Symbol;Acc:VGNC:29787]
Q9XSK7	5.37e-08	9.18551	4	heparin binding growth factor [Source:VGNC Symbol;Acc:VGNC:29787]
Q2HJ60	5.78e-07	8.16532	4	heteroous nuclear ribonucleoprotein A2/B1 [Source:VGNC Symbol;Acc:VGNC:29894]
Q3T0D0	7.88e-05	6.04551	4	heteroous nuclear ribonucleoprotein K [Source:VGNC Symbol;Acc:VGNC:29897]
P10103	0.000412652	7.51555	4	high mobility group box 1 [Source:VGNC Symbol;Acc:VGNC:53816]
P10103	0.00630739	5.55803	3	high mobility group box 1 [Source:VGNC Symbol;Acc:VGNC:53816]
P40673	0.00634388	4.11137	3	high mobility group box 2 [Source:NCBI gene (formerly Entrezgene);Acc:540444]
P40673	9.86e-07	8.57869	4	high mobility group box 2 [Source:NCBI gene (formerly Entrezgene);Acc:540444]
Q0VCM5	0.0104139	5.05543	2	inter-alpha-trypsin inhibitor heavy chain 1 [Source:VGNC Symbol;Acc:VGNC:30334]
Q0VCM5	0.0181639	4.62188	3	inter-alpha-trypsin inhibitor heavy chain 1 [Source:VGNC Symbol;Acc:VGNC:30334]
P19858	1.37e-12	8.30313	4	lactate dehydrogenase A [Source:NCBI gene (formerly Entrezgene);Acc:281274]
Q5E9B1	8.01e-05	7.34361	3	lactate dehydrogenase B [Source:VGNC Symbol;Acc:VGNC:30824]
Q5E9B1	6.14e-06	8.80979	4	lactate dehydrogenase B [Source:VGNC Symbol;Acc:VGNC:30824]
P80025	0.000316726	-2.45233	4	lactoperoxidase [Source:VGNC Symbol;Acc:VGNC:30970]
P80025	0.00264402	-1.97636	3	lactoperoxidase [Source:VGNC Symbol;Acc:VGNC:30970]
P80025	0.00383809	-1.88924	2	lactoperoxidase [Source:VGNC Symbol;Acc:VGNC:30970]
P24627	5.77e-07	2.45018	4	lactotransferrin [Source:VGNC Symbol;Acc:VGNC:31077]
P80177	0.000200769	4.30654	4	macrophage migration inhibitory factor [Source:VGNC Symbol;Acc:VGNC:49557]
Q0VBZ9	0.00323562	2.6482	3	MARCKS like 1 [Source:VGNC Symbol;Acc:VGNC:31245]
Q0VBZ9	1.37e-06	4.97107	4	MARCKS like 1 [Source:VGNC Symbol;Acc:VGNC:31245]
P52176	0.000108452	7.77621	1	matrix metallopeptidase 9 [Source:VGNC Symbol;Acc:VGNC:31531]
P52176	0.014785	4.51668	4	matrix metallopeptidase 9 [Source:VGNC Symbol;Acc:VGNC:31531]
P52176	7.07e-06	9.46804	2	matrix metallopeptidase 9 [Source:VGNC Symbol;Acc:VGNC:31531]
P52176	6.95e-05	8.053	3	matrix metallopeptidase 9 [Source:VGNC Symbol;Acc:VGNC:31531]
P54149	0.00159163	5.16098	4	methionine sulfoxide reductase A [Source:VGNC Symbol;Acc:VGNC:31705]
Q2HJ49	2.33e-08	10.2341	3	moesin [Source:VGNC Symbol;Acc:VGNC:31703]
Q2HJ49	2.09e-09	11.5045	4	moesin [Source:VGNC Symbol;Acc:VGNC:31703]
P02192	1.06e-05	-1.69545	4	myoglobin [Source:VGNC Symbol;Acc:VGNC:31270]
P02192	0.00185939	-1.09592	2	myoglobin [Source:VGNC Symbol;Acc:VGNC:31270]
P02192	1.79e-05	-1.63523	3	myoglobin [Source:VGNC Symbol;Acc:VGNC:31270]
P60661	1.95e-07	8.00242	4	myosin light chain 6 [Source:VGNC Symbol;Acc:VGNC:50223]
P60661	0.00353895	3.77462	3	myosin light chain 6 [Source:VGNC Symbol;Acc:VGNC:50223]
A4IF97	8.54e-06	6.32711	4	myosin, light chain 12B, regulatory [Source:NCBI gene (formerly Entrezgene);Acc:614055]
Q8SQ24	0.000723753	-11.5649	3	myozenin 1 [Source:VGNC Symbol;Acc:VGNC:31840]
Q8SQ24	0.000723753	-11.5649	4	myozenin 1 [Source:VGNC Symbol;Acc:VGNC:31840]
Q3T0Q4	3.37e-07	7.85883	4	non-metastatic cells 2, protein (NM23B) expressed in [Source:NCBI gene (formerly Entrezgene);Acc:615447]
P79345	0.00477428	-7.74924	3	NPC intracellular cholesterol transporter 2 [Source:VGNC Symbol;Acc:VGNC:32196]
Q8MJ50	0.000335416	3.71276	4	osteoclast stimulating factor 1 [Source:VGNC Symbol;Acc:VGNC:32479]
Q8SPP7	6.26e-12	14.0609	4	peptidoglycan recognition protein 1 [Source:VGNC Symbol;Acc:VGNC:32791]
Q8SPP7	4.53e-10	11.6903	1	peptidoglycan recognition protein 1 [Source:VGNC Symbol;Acc:VGNC:32791]
Q8SPP7	3.72e-11	13.0453	2	peptidoglycan recognition protein 1 [Source:VGNC Symbol;Acc:VGNC:32791]
Q8SPP7	1.97e-12	14.746	3	peptidoglycan recognition protein 1 [Source:VGNC Symbol;Acc:VGNC:32791]
Q5E947	1.04e-05	5.82817	4	peroxiredoxin 1 [Source:VGNC Symbol;Acc:VGNC:33299]
Q9BGI1	1.39e-08	7.76094	3	peroxiredoxin 5 [Source:VGNC Symbol;Acc:VGNC:33303]
Q9BGI1	7.52e-10	8.91091	4	peroxiredoxin 5 [Source:VGNC Symbol;Acc:VGNC:33303]
O77834	0.00368344	4.33346	3	peroxiredoxin 6 [Source:VGNC Symbol;Acc:VGNC:33304]
O77834	2.52e-07	9.10335	4	peroxiredoxin 6 [Source:VGNC Symbol;Acc:VGNC:33304]
P13696	0.00213288	-5.18271	3	phosphatidylethanolamine binding protein 1 [Source:VGNC Symbol;Acc:VGNC:32735]
P13696	0.00177996	-5.28879	1	phosphatidylethanolamine binding protein 1 [Source:VGNC Symbol;Acc:VGNC:32735]
P13696	0.000234143	-6.44191	2	phosphatidylethanolamine binding protein 1 [Source:VGNC Symbol;Acc:VGNC:32735]
Q3T0P6	0.0111798	8.0257	4	phosphoglycerate kinase 1 [Source:VGNC Symbol;Acc:VGNC:32789]
Q3SZ62	0.000320512	7.5477	3	phosphoglycerate mutase 1 [Source:VGNC Symbol;Acc:VGNC:55961]
Q3SZ62	1.69e-05	9.49684	4	phosphoglycerate mutase 1 [Source:VGNC Symbol;Acc:VGNC:55961]
P02584	3.68e-07	11.8912	4	profilin 1 [Source:NCBI gene (formerly Entrezgene);Acc:513895]
P02584	8.79e-05	8.31107	2	profilin 1 [Source:NCBI gene (formerly Entrezgene);Acc:513895]
P02584	9.99e-07	11.2311	3	profilin 1 [Source:NCBI gene (formerly Entrezgene);Acc:513895]
P02584	0.00336022	5.84674	1	profilin 1 [Source:NCBI gene (formerly Entrezgene);Acc:513895]
P02754	2.23e-07	-3.61462	3	progestagen-associated endometrial protein [Source:NCBI gene (formerly Entrezgene);Acc:280838]
P02754	0.000276251	-2.23419	2	progestagen-associated endometrial protein [Source:NCBI gene (formerly Entrezgene);Acc:280838]
P02754	7.57e-09	-4.30143	4	progestagen-associated endometrial protein [Source:NCBI gene (formerly Entrezgene);Acc:280838]
P02754	0.00288394	-1.76073	1	progestagen-associated endometrial protein [Source:NCBI gene (formerly Entrezgene);Acc:280838]
Q5E9G3	1.34e-06	5.87962	4	proteasome activator subunit 2 [Source:VGNC Symbol;Acc:VGNC:33474]
Q5E9C0	0.00466057	2.75772	4	Ras suppressor protein 1 [Source:VGNC Symbol;Acc:VGNC:57022]
Q3T114	8.35e-06	10.4098	3	reactive intermediate imine deaminase A homolog [Source:VGNC Symbol;Acc:VGNC:33964]
Q3T114	2.19e-06	11.3308	4	reactive intermediate imine deaminase A homolog [Source:VGNC Symbol;Acc:VGNC:33964]
Q762I5	0.000417304	6.69317	2	resistin [Source:VGNC Symbol;Acc:VGNC:33877]
Q762I5	7.43e-07	10.5026	3	resistin [Source:VGNC Symbol;Acc:VGNC:33877]
Q762I5	1.94e-06	9.9233	4	resistin [Source:VGNC Symbol;Acc:VGNC:33877]
P42899	7.17e-07	5.566	4	ribosomal protein lateral stalk subunit P2 [Source:VGNC Symbol;Acc:VGNC:34119]
P79105	4.19e-05	9.04439	4	S100 calcium binding protein A12 [Source:VGNC Symbol;Acc:VGNC:59189]
P28782	0.00398483	4.95169	4	S100 calcium binding protein A8 [Source:VGNC Symbol;Acc:VGNC:34246]
A8YXY3	0.00137196	-6.93811	4	selenoprotein F [Source:NCBI gene (formerly Entrezgene);Acc:614360]
A8YXY3	0.00147422	-6.88493	3	selenoprotein F [Source:NCBI gene (formerly Entrezgene);Acc:614360]
Q1JPB0	0.000899134	6.51751	3	serpin family B member 1 [Source:VGNC Symbol;Acc:VGNC:34470]
Q1JPB0	5.34e-05	8.32224	4	serpin family B member 1 [Source:VGNC Symbol;Acc:VGNC:34470]
P28800	0.00206192	1.61336	4	serpin family F member 2 [Source:VGNC Symbol;Acc:VGNC:34479]
P28800	3.88e-05	2.30492	1	serpin family F member 2 [Source:VGNC Symbol;Acc:VGNC:34479]
P28800	8.39e-06	2.56408	2	serpin family F member 2 [Source:VGNC Symbol;Acc:VGNC:34479]
P28800	6.87e-05	2.20758	3	serpin family F member 2 [Source:VGNC Symbol;Acc:VGNC:34479]
Q32L76	0.00291826	6.03579	2	serum amyloid A4, constitutive [Source:NCBI gene (formerly Entrezgene);Acc:505308]
Q32L76	0.0165553	4.72869	3	serum amyloid A4, constitutive [Source:NCBI gene (formerly Entrezgene);Acc:505308]
Q9GMB8	5.69e-11	6.72931	4	seryl-tRNA synthetase 1 [Source:VGNC Symbol;Acc:VGNC:34291]
Q3ZCL8	5.31e-10	9.56851	4	SH3 domain binding glutamate rich protein like 3 [Source:NCBI gene (formerly Entrezgene);Acc:614672]
Q3ZCL8	0.000594495	4.09123	2	SH3 domain binding glutamate rich protein like 3 [Source:NCBI gene (formerly Entrezgene);Acc:614672]
Q3ZCL8	4.46e-09	8.6679	3	SH3 domain binding glutamate rich protein like 3 [Source:NCBI gene (formerly Entrezgene);Acc:614672]
Q32KV6	0.000879239	-8.19827	3	SIL1 nucleotide exchange factor [Source:VGNC Symbol;Acc:VGNC:34622]
Q3SZK8	0.00232275	2.98412	3	SLC9A3 regulator 1 [Source:VGNC Symbol;Acc:VGNC:34941]
Q3SZK8	5.72e-06	4.92952	4	SLC9A3 regulator 1 [Source:VGNC Symbol;Acc:VGNC:34941]
P29392	0.00012937	-8.35296	3	spermadhesin 1 [Source:NCBI gene (formerly Entrezgene);Acc:282373]
P29392	0.00012937	-8.35296	4	spermadhesin 1 [Source:NCBI gene (formerly Entrezgene);Acc:282373]
P29392	0.00812873	-5.39343	2	spermadhesin 1 [Source:NCBI gene (formerly Entrezgene);Acc:282373]
Q58DD4	0.00299829	-4.9007	3	syndecan 2 [Source:VGNC Symbol;Acc:VGNC:34379]
Q58DD4	0.00299829	-4.9007	4	syndecan 2 [Source:VGNC Symbol;Acc:VGNC:34379]
O97680	5.21e-05	7.64126	4	thioredoxin [Source:VGNC Symbol;Acc:VGNC:56751]
O97680	0.000619452	6.19604	3	thioredoxin [Source:VGNC Symbol;Acc:VGNC:56751]
P21752	0.00235855	8.36504	3	thymosin beta 10 [Source:NCBI gene (formerly Entrezgene);Acc:282385]
P21752	0.0148924	6.50534	4	thymosin beta 10 [Source:NCBI gene (formerly Entrezgene);Acc:282385]
Q5E9F5	0.00343724	3.72346	3	transgelin 2 [Source:VGNC Symbol;Acc:VGNC:35586]
Q5E9F5	4.4e-07	7.51822	4	transgelin 2 [Source:VGNC Symbol;Acc:VGNC:35586]
O46375	0.00649666	1.15825	2	transthyretin [Source:VGNC Symbol;Acc:VGNC:36499]
O46375	0.00299574	1.27892	1	transthyretin [Source:VGNC Symbol;Acc:VGNC:36499]
Q3ZCJ7	9.03e-06	7.99609	4	tubulin alpha 1c [Source:NCBI gene (formerly Entrezgene);Acc:504244]
Q2HJ81	0.0102946	2.55468	4	tubulin beta 6 class V [Source:VGNC Symbol;Acc:VGNC:36509]
Q2KJD0	1.25e-06	5.81675	4	tubulin beta class I [Source:VGNC Symbol;Acc:VGNC:103058]
P62261	1.13e-09	8.60689	3	tyrosine 3-monooxygenase/tryptophan 5-monooxygenase activation protein epsilon [Source:VGNC Symbol;Acc:VGNC:37045]
P62261	5.13e-11	9.87588	4	tyrosine 3-monooxygenase/tryptophan 5-monooxygenase activation protein epsilon [Source:VGNC Symbol;Acc:VGNC:37045]
Q3SZI4	4.64e-05	7.10111	4	tyrosine 3-monooxygenase/tryptophan 5-monooxygenase activation protein theta [Source:VGNC Symbol;Acc:VGNC:37047]
Q3SZI4	0.000419162	5.92187	3	tyrosine 3-monooxygenase/tryptophan 5-monooxygenase activation protein theta [Source:VGNC Symbol;Acc:VGNC:37047]
P63103	0.0093533	4.96613	4	tyrosine 3-monooxygenase/tryptophan 5-monooxygenase activation protein zeta [Source:VGNC Symbol;Acc:VGNC:53885]
P63048	0.00324974	-6.12316	2	ubiquitin A-52 residue ribosomal protein fusion product 1 [Source:VGNC Symbol;Acc:VGNC:49988]
A5PJS6	0.0200649	-5.48187	4	ubiquitin specific peptidase 10 [Source:VGNC Symbol;Acc:VGNC:36710]
P41541	0.00115615	-8.88178	3	USO1 vesicle transport factor [Source:VGNC Symbol;Acc:VGNC:36708]
Q2TA49	1.07e-09	8.58688	4	vasodilator stimulated phosphoprotein [Source:VGNC Symbol;Acc:VGNC:36769]
Q2TA49	1.32e-08	7.62018	3	vasodilator stimulated phosphoprotein [Source:VGNC Symbol;Acc:VGNC:36769]
P48616	8.17e-11	11.0733	3	vimentin [Source:VGNC Symbol;Acc:VGNC:36796]
P48616	2.19e-05	5.70131	1	vimentin [Source:VGNC Symbol;Acc:VGNC:36796]
P48616	2.23e-12	12.8821	4	vimentin [Source:VGNC Symbol;Acc:VGNC:36796]
P48616	0.000648309	4.3217	2	vimentin [Source:VGNC Symbol;Acc:VGNC:36796]
P67808	8.18e-14	6.05395	3	Y-box binding protein 1 [Source:VGNC Symbol;Acc:VGNC:50233]
P67808	1.07e-14	6.5493	4	Y-box binding protein 1 [Source:VGNC Symbol;Acc:VGNC:50233]
A4Z945	0.00079335	7.94712	4	zinc finger BED-type containing 8 [Source:VGNC Symbol;Acc:VGNC:37055]
A4Z945	0.000260475	8.81353	3	zinc finger BED-type containing 8 [Source:VGNC Symbol;Acc:VGNC:37055]
A4Z945	0.00169699	7.34167	2	zinc finger BED-type containing 8 [Source:VGNC Symbol;Acc:VGNC:37055]

## Sheet: UniProt ID to UniProt ID
UniProt ID	FDR-adjusted P-value	logFC	Treatments	uniprotswissprot.1
A4FUA8	0.000185668	5.63894	3	A4FUA8
A4FUA8	4.34e-08	9.61609	4	A4FUA8
A4IF97	8.54e-06	6.32711	4	A4IF97
A4IFB6	3.61e-05	8.33509	2	A4IFB6
A4IFB6	0.00328328	5.49666	1	A4IFB6
A4IFB6	0.000311413	7.00967	3	A4IFB6
A4IFB6	0.00132329	6.09298	4	A4IFB6
A4Z945	0.00079335	7.94712	4	A4Z945
A4Z945	0.000260475	8.81353	3	A4Z945
A4Z945	0.00169699	7.34167	2	A4Z945
A5D7A0	7.4e-07	9.26956	3	A5D7A0
A5D7A0	9.14e-08	10.4032	4	A5D7A0
A5D7D1	2.56e-05	9.35666	4	A5D7D1
A5D7D1	0.0038029	5.91108	3	A5D7D1
A5PJS6	0.0200649	-5.48187	4	A5PJS6
A8YXY3	0.00137196	-6.93811	4	A8YXY3
A8YXY3	0.00147422	-6.88493	3	A8YXY3
O46375	0.00649666	1.15825	2	O46375
O46375	0.00299574	1.27892	1	O46375
O77834	0.00368344	4.33346	3	O77834
O77834	2.52e-07	9.10335	4	O77834
O97680	5.21e-05	7.64126	4	O97680
O97680	0.000619452	6.19604	3	O97680
P01035	0.000593075	-1.46485	4	P01035
P02192	1.06e-05	-1.69545	4	P02192
P02192	0.00185939	-1.09592	2	P02192
P02192	1.79e-05	-1.63523	3	P02192
P02584	3.68e-07	11.8912	4	P02584
P02584	8.79e-05	8.31107	2	P02584
P02584	9.99e-07	11.2311	3	P02584
P02584	0.00336022	5.84674	1	P02584
P02754	2.23e-07	-3.61462	3	P02754
P02754	0.000276251	-2.23419	2	P02754
P02754	7.57e-09	-4.30143	4	P02754
P02754	0.00288394	-1.76073	1	P02754
P07688	1.35e-06	7.53791	4	P07688
P08037	0.00192624	-5.66784	2	P08037
P08166	0.000204713	4.04032	4	P08166
P09487	0.00338382	3.08083	4	P09487
P10096	0.00358276	4.28202	2	P10096
P10096	8.57e-09	10.6749	4	P10096
P10096	4.3e-07	8.70175	3	P10096
P10103	0.000412652	7.51555	4	P10103
P10103	0.00630739	5.55803	3	P10103
P10790	1.78e-07	-4.52013	4	P10790
P10790	8.71e-05	-3.03769	2	P10790
P10790	3.42e-07	-4.36105	3	P10790
P10790	0.000324267	-2.72112	1	P10790
P11116	1.27e-07	7.31999	4	P11116
P11116	0.00457273	3.26635	3	P11116
P13696	0.00213288	-5.18271	3	P13696
P13696	0.00177996	-5.28879	1	P13696
P13696	0.000234143	-6.44191	2	P13696
P15497	2.95e-05	2.65339	1	P15497
P15497	1.65e-05	2.76396	3	P15497
P15497	0.000688699	2.04206	4	P15497
P15497	4.7e-06	3.00429	2	P15497
P17697	0.0170243	-1.42455	3	P17697
P17697	0.00327738	-1.80158	2	P17697
P19035	0.00700333	6.23359	1	P19035
P19035	0.000765338	8.06365	3	P19035
P19035	0.0031963	6.9009	2	P19035
P19035	0.0238946	5.12334	4	P19035
P19120	9.9e-05	7.63568	4	P19120
P19120	0.00293336	5.51203	3	P19120
P19660	1.88e-05	10.7166	4	P19660
P19660	0.0057626	6.27835	1	P19660
P19660	1.22e-05	11.0387	3	P19660
P19660	3.86e-05	10.179	2	P19660
P19858	1.37e-12	8.30313	4	P19858
P21752	0.00235855	8.36504	3	P21752
P21752	0.0148924	6.50534	4	P21752
P21856	2.07e-09	8.28498	4	P21856
P21856	0.0107476	2.67299	3	P21856
P22226	1.4e-10	12.83	3	P22226
P22226	2.83e-08	10.0031	1	P22226
P22226	7.61e-10	11.8962	2	P22226
P22226	4.27e-10	12.2115	4	P22226
P24627	5.77e-07	2.45018	4	P24627
P25326	2.46e-05	7.05894	3	P25326
P25326	5.37e-06	7.82146	4	P25326
P26201	0.000103282	-6.44679	2	P26201
P26201	0.000103282	-6.44679	3	P26201
P26201	0.000103282	-6.44679	1	P26201
P26201	0.000103282	-6.44679	4	P26201
P28782	0.00398483	4.95169	4	P28782
P28800	0.00206192	1.61336	4	P28800
P28800	3.88e-05	2.30492	1	P28800
P28800	8.39e-06	2.56408	2	P28800
P28800	6.87e-05	2.20758	3	P28800
P29392	0.00012937	-8.35296	3	P29392
P29392	0.00012937	-8.35296	4	P29392
P29392	0.00812873	-5.39343	2	P29392
P31976	0.000119564	7.6299	4	P31976
P31976	0.00155487	6.01021	3	P31976
P33046	1.08e-06	11.3547	2	P33046
P33046	8.29e-07	11.5329	4	P33046
P33046	3.01e-07	12.2147	3	P33046
P33046	0.000265995	7.70114	1	P33046
P33097	0.010577	1.91663	4	P33097
P40673	0.00634388	4.11137	3	P40673
P40673	9.86e-07	8.57869	4	P40673
P41541	0.00115615	-8.88178	3	P41541
P42899	7.17e-07	5.566	4	P42899
P48616	8.17e-11	11.0733	3	P48616
P48616	2.19e-05	5.70131	1	P48616
P48616	2.23e-12	12.8821	4	P48616
P48616	0.000648309	4.3217	2	P48616
P51122	0.00388679	3.52573	4	P51122
P52176	0.000108452	7.77621	1	P52176
P52176	0.014785	4.51668	4	P52176
P52176	7.07e-06	9.46804	2	P52176
P52176	6.95e-05	8.053	3	P52176
P54149	0.00159163	5.16098	4	P54149
P55052	0.00013344	4.59447	4	P55052
P56425	9.06e-09	13.5359	3	P56425
P56425	2.64e-08	12.8368	4	P56425
P56425	1.7e-08	13.1232	2	P56425
P56425	1.6e-06	10.2492	1	P56425
P60661	1.95e-07	8.00242	4	P60661
P60661	0.00353895	3.77462	3	P60661
P61157	1.59e-07	9.05941	4	P61157
P61157	0.00425462	4.12963	3	P61157
P62157	3.59e-05	8.09987	3	P62157
P62157	2.77e-07	11.0012	4	P62157
P62261	1.13e-09	8.60689	3	P62261
P62261	5.13e-11	9.87588	4	P62261
P63048	0.00324974	-6.12316	2	P63048
P63103	0.0093533	4.96613	4	P63103
P63258	5.61e-06	3.29606	1	P63258
P63258	8.53e-11	5.82914	3	P63258
P63258	6.91e-09	4.76779	2	P63258
P63258	2.39e-11	6.15693	4	P63258
P67808	8.18e-14	6.05395	3	P67808
P67808	1.07e-14	6.5493	4	P67808
P68103	0.00201433	5.27563	3	P68103
P68103	7.55e-06	8.42112	4	P68103
P79105	4.19e-05	9.04439	4	P79105
P79345	0.00477428	-7.74924	3	P79345
P80025	0.000316726	-2.45233	4	P80025
P80025	0.00264402	-1.97636	3	P80025
P80025	0.00383809	-1.88924	2	P80025
P80177	0.000200769	4.30654	4	P80177
P80195	1.56e-07	-3.58589	3	P80195
P80195	0.000976054	-1.92966	1	P80195
P80195	3.92e-09	-4.31975	4	P80195
P80195	4.78e-05	-2.50524	2	P80195
P80724	1.76e-06	9.76995	3	P80724
P80724	0.00210505	5.55784	2	P80724
P80724	9.89e-07	10.1114	4	P80724
P81187	4.31e-09	3.02697	4	P81187
P81187	5.98e-06	2.03721	2	P81187
P81187	0.000102797	1.66215	1	P81187
P81187	1.2e-08	2.88011	3	P81187
Q0VBZ9	0.00323562	2.6482	3	Q0VBZ9
Q0VBZ9	1.37e-06	4.97107	4	Q0VBZ9
Q0VCM4	1.09e-09	8.96438	4	Q0VCM4
Q0VCM4	0.00075341	3.87133	3	Q0VCM4
Q0VCM5	0.0104139	5.05543	2	Q0VCM5
Q0VCM5	0.0181639	4.62188	3	Q0VCM5
Q0VCX2	0.00192999	-6.26389	3	Q0VCX2
Q0VCX2	0.00211543	-6.19951	2	Q0VCX2
Q10741	0.0119535	6.26054	4	Q10741
Q10741	0.0200962	5.74386	3	Q10741
Q148J6	8.65e-06	8.97511	4	Q148J6
Q148J6	0.0159463	4.28491	3	Q148J6
Q1JPB0	0.000899134	6.51751	3	Q1JPB0
Q1JPB0	5.34e-05	8.32224	4	Q1JPB0
Q27975	0.000514935	5.85613	4	Q27975
Q27975	0.0155708	3.86016	3	Q27975
Q29437	1e-05	8.7349	3	Q29437
Q29437	2.58e-05	8.18171	4	Q29437
Q29437	9.2e-06	8.78352	2	Q29437
Q29437	0.000204768	6.96475	1	Q29437
Q29RY4	0.0172006	4.92661	4	Q29RY4
Q2HJ49	2.33e-08	10.2341	3	Q2HJ49
Q2HJ49	2.09e-09	11.5045	4	Q2HJ49
Q2HJ57	0.00122314	4.17029	4	Q2HJ57
Q2HJ60	5.78e-07	8.16532	4	Q2HJ60
Q2HJ81	0.0102946	2.55468	4	Q2HJ81
Q2KIT0	0.00167464	1.70016	1	Q2KIT0
Q2KIT0	0.000996025	1.79614	3	Q2KIT0
Q2KIT0	0.000201163	2.08394	2	Q2KIT0
Q2KIT0	0.0083291	1.39109	4	Q2KIT0
Q2KIU3	0.000757961	1.72368	3	Q2KIU3
Q2KIU3	0.000953264	1.68462	1	Q2KIU3
Q2KIU3	0.000755362	1.72426	2	Q2KIU3
Q2KIU3	0.0127802	1.2176	4	Q2KIU3
Q2KJD0	1.25e-06	5.81675	4	Q2KJD0
Q2KJF1	0.00225242	1.21197	4	Q2KJF1
Q2KJF1	4.31e-05	1.73532	3	Q2KJF1
Q2KJF1	2.94e-05	1.78437	2	Q2KJF1
Q2KJF1	0.000107615	1.61708	1	Q2KJF1
Q2KJI3	2.61e-05	7.16259	3	Q2KJI3
Q2KJI3	5.73e-07	9.12591	4	Q2KJI3
Q2TA49	1.07e-09	8.58688	4	Q2TA49
Q2TA49	1.32e-08	7.62018	3	Q2TA49
Q32KV6	0.000879239	-8.19827	3	Q32KV6
Q32L76	0.00291826	6.03579	2	Q32L76
Q32L76	0.0165553	4.72869	3	Q32L76
Q32LE5	0.000105333	6.38273	4	Q32LE5
Q32LE5	0.0197914	3.52006	3	Q32LE5
Q3B7N2	2.48e-07	6.80178	3	Q3B7N2
Q3B7N2	5.12e-11	10.2208	4	Q3B7N2
Q3MHL4	2.67e-07	7.81399	4	Q3MHL4
Q3MHR7	2.89e-09	9.23004	4	Q3MHR7
Q3MHR7	0.000766446	4.16372	3	Q3MHR7
Q3SYU2	0.000174951	4.48987	4	Q3SYU2
Q3SYW2	0.000102972	6.3885	4	Q3SYW2
Q3SYW2	0.00606859	4.21815	3	Q3SYW2
Q3SZ62	0.000320512	7.5477	3	Q3SZ62
Q3SZ62	1.69e-05	9.49684	4	Q3SZ62
Q3SZI4	4.64e-05	7.10111	4	Q3SZI4
Q3SZI4	0.000419162	5.92187	3	Q3SZI4
Q3SZK8	0.00232275	2.98412	3	Q3SZK8
Q3SZK8	5.72e-06	4.92952	4	Q3SZK8
Q3T035	0.00664828	5.18131	3	Q3T035
Q3T035	0.000163916	7.64996	4	Q3T035
Q3T0D0	7.88e-05	6.04551	4	Q3T0D0
Q3T0I4	1.4e-05	4.30475	4	Q3T0I4
Q3T0P6	0.0111798	8.0257	4	Q3T0P6
Q3T0Q4	3.37e-07	7.85883	4	Q3T0Q4
Q3T114	8.35e-06	10.4098	3	Q3T114
Q3T114	2.19e-06	11.3308	4	Q3T114
Q3T149	0.002626	3.96064	3	Q3T149
Q3T149	1.84e-07	8.12587	4	Q3T149
Q3ZBD7	0.00248869	5.59723	2	Q3ZBD7
Q3ZBD7	4.53e-07	10.8571	3	Q3ZBD7
Q3ZBD7	0.000124969	6.17597	4	Q3ZBD7
Q3ZBD7	5.69e-08	12.1463	4	Q3ZBD7
Q3ZC66	0.00151129	-12.5731	3	Q3ZC66
Q3ZC66	0.0194788	-8.89044	4	Q3ZC66
Q3ZCJ7	9.03e-06	7.99609	4	Q3ZCJ7
Q3ZCL8	5.31e-10	9.56851	4	Q3ZCL8
Q3ZCL8	0.000594495	4.09123	2	Q3ZCL8
Q3ZCL8	4.46e-09	8.6679	3	Q3ZCL8
Q58D62	0.00394745	5.97433	3	Q58D62
Q58D62	0.0198921	4.70546	4	Q58D62
Q58DD4	0.00299829	-4.9007	3	Q58DD4
Q58DD4	0.00299829	-4.9007	4	Q58DD4
Q5E947	1.04e-05	5.82817	4	Q5E947
Q5E9B1	8.01e-05	7.34361	3	Q5E9B1
Q5E9B1	6.14e-06	8.80979	4	Q5E9B1
Q5E9C0	0.00466057	2.75772	4	Q5E9C0
Q5E9F5	0.00343724	3.72346	3	Q5E9F5
Q5E9F5	4.4e-07	7.51822	4	Q5E9F5
Q5E9F7	8.62e-08	12.1786	4	Q5E9F7
Q5E9F7	0.00112532	6.2573	2	Q5E9F7
Q5E9F7	8.66e-07	10.72	3	Q5E9F7
Q5E9G3	1.34e-06	5.87962	4	Q5E9G3
Q6EWQ7	0.000173703	4.27461	4	Q6EWQ7
Q762I5	0.000417304	6.69317	2	Q762I5
Q762I5	7.43e-07	10.5026	3	Q762I5
Q762I5	1.94e-06	9.9233	4	Q762I5
Q76LV1	0.010194	4.61507	3	Q76LV1
Q76LV2	9.54e-09	10.8951	4	Q76LV2
Q76LV2	1.38e-07	9.50342	3	Q76LV2
Q865V6	0.0169933	3.23073	4	Q865V6
Q8MJ50	0.000335416	3.71276	4	Q8MJ50
Q8SPP7	6.26e-12	14.0609	4	Q8SPP7
Q8SPP7	4.53e-10	11.6903	1	Q8SPP7
Q8SPP7	3.72e-11	13.0453	2	Q8SPP7
Q8SPP7	1.97e-12	14.746	3	Q8SPP7
Q8SQ24	0.000723753	-11.5649	3	Q8SQ24
Q8SQ24	0.000723753	-11.5649	4	Q8SQ24
Q92176	1.57e-05	7.90119	4	Q92176
Q92176	4.1e-05	7.37975	3	Q92176
Q9BGI1	1.39e-08	7.76094	3	Q9BGI1
Q9BGI1	7.52e-10	8.91091	4	Q9BGI1
Q9GMB8	5.69e-11	6.72931	4	Q9GMB8
Q9MZ06	0.00680913	-1.70467	3	Q9MZ06
Q9XSK7	0.000139051	5.57891	3	Q9XSK7
Q9XSK7	5.37e-08	9.18551	4	Q9XSK7
