# Supplementary material for: Development of a bioinformatics platform for analysis of quantitative transcriptomics and proteomics data: the OMnalysis
Source: PeerJ. 2021 Nov 9;9:e12415. doi: 10.7717/peerj.12415 (PMC8588854; doi:10.7717/peerj.12415)
Supplement: Supplemental Information 9 [file peerj-09-12415-s009.xlsx]

## Sheet: GO Biological process
ID	Description	GeneRatio	BgRatio	pvalue	p.adjust	qvalue	geneID	Count
GO:0032496	response to lipopolysaccharide	36/261	334/18866	7.96344e-22	3.72371e-18	2.49968e-18	CX3CL1/SELE/NFKB2/CXCL2/P2RX7/ICAM1/NFKBIA/RIPK2/CSF3/CCL2/NFKB1/IL1A/TNFAIP3/CXCL6/IL1B/GCH1/IRAK2/IL6/TLR2/SMAD6/TIMP4/IL24/CLDN1/CXCL3/CXCL5/CXCL1/ZC3H12A/LGALS9/CXCL10/CXCL11/CXCL8/TRIB1/LTA/TNF/LYN/CCL5	36
GO:0002237	response to molecule of bacterial origin	36/261	356/18866	6.91211e-21	1.61605e-17	1.08484e-17	CX3CL1/SELE/NFKB2/CXCL2/P2RX7/ICAM1/NFKBIA/RIPK2/CSF3/CCL2/NFKB1/IL1A/TNFAIP3/CXCL6/IL1B/GCH1/IRAK2/IL6/TLR2/SMAD6/TIMP4/IL24/CLDN1/CXCL3/CXCL5/CXCL1/ZC3H12A/LGALS9/CXCL10/CXCL11/CXCL8/TRIB1/LTA/TNF/LYN/CCL5	36
GO:0071222	cellular response to lipopolysaccharide	27/261	208/18866	1.1054e-18	1.72295e-15	1.1566e-15	CX3CL1/CXCL2/ICAM1/NFKBIA/RIPK2/CSF3/CCL2/NFKB1/IL1A/TNFAIP3/CXCL6/IL1B/IRAK2/IL6/TLR2/IL24/CXCL3/CXCL5/CXCL1/ZC3H12A/CXCL10/CXCL11/CXCL8/TRIB1/TNF/LYN/CCL5	27
GO:0071219	cellular response to molecule of bacterial origin	27/261	222/18866	6.08146e-18	7.10923e-15	4.77235e-15	CX3CL1/CXCL2/ICAM1/NFKBIA/RIPK2/CSF3/CCL2/NFKB1/IL1A/TNFAIP3/CXCL6/IL1B/IRAK2/IL6/TLR2/IL24/CXCL3/CXCL5/CXCL1/ZC3H12A/CXCL10/CXCL11/CXCL8/TRIB1/TNF/LYN/CCL5	27
GO:0071216	cellular response to biotic stimulus	28/261	246/18866	8.50598e-18	7.95479e-15	5.33997e-15	CX3CL1/CXCL2/ICAM1/NFKBIA/RIPK2/CSF3/CCL2/NFKB1/IL1A/TNFAIP3/CXCL6/IL1B/IRAK2/IL6/TLR2/BCL2L11/IL24/CXCL3/CXCL5/CXCL1/ZC3H12A/CXCL10/CXCL11/CXCL8/TRIB1/TNF/LYN/CCL5	28
GO:0050727	regulation of inflammatory response	34/261	425/18866	1.31568e-16	1.02535e-13	6.88307e-14	SLC7A2/CX3CL1/SELE/BIRC3/CYLD/NFKBIA/NFKB1/IL23A/TNFAIP3/TNFAIP6/IL1B/C3/LDLR/ETS1/IL6/TLR2/NFKBIZ/TNIP1/ADAM8/GBP5/BCL6B/ZC3H12A/ITGA2/GPRC5B/SAA1/PER1/LACC1/CD47/C2CD4A/C2CD4B/LTA/TNF/LYN/CCL5	34
GO:0022407	regulation of cell-cell adhesion	34/261	439/18866	3.5012e-16	2.3388e-13	1.57001e-13	CX3CL1/SELE/PLAUR/CD44/CEACAM1/CYLD/ICAM1/JAG1/TNFSF13B/RIPK2/JAK3/CCL2/ZBTB16/IL23A/IL1A/IRF1/IL1B/ETS1/SERPINE2/IL6/IL1RN/NFKBIZ/TNFRSF21/ADAM8/PLPP3/VCAM1/ZC3H12A/IL7R/LGALS9/C1QTNF1/CD47/TNF/LYN/CCL5	34
GO:0045785	positive regulation of cell adhesion	33/261	428/18866	1.12591e-15	6.58094e-13	4.41771e-13	CX3CL1/SELE/PLAUR/CD44/LIMS2/CYLD/ICAM1/TNFSF13B/RIPK2/JAK3/CCL2/ZBTB16/IL23A/IL1A/IL1B/KDR/ETS1/DYSF/IL6/NFKBIZ/ADAM8/ABI3BP/PLPP3/VCAM1/ITGA2/IL7R/LGALS9/SAA1/CSF1/CD47/TNF/LYN/CCL5	33
GO:0009615	response to virus	29/261	349/18866	9.93303e-15	5.16076e-12	3.46436e-12	BIRC3/POU2F2/DDX58/DHX58/IL23A/IFIH1/ODC1/GBP3/GBP1/TNFAIP3/IFIT3/IFIT2/IRF1/IL1B/TRIM22/OASL/IL6/RTP4/HMGA2/ZC3H12A/LGALS9/CXCL10/ISG20/FOSL1/MX2/TNF/APOBEC3G/IKBKE/CCL5	29
GO:0022409	positive regulation of cell-cell adhesion	26/261	279/18866	1.7291e-14	7.71427e-12	5.1785e-12	CX3CL1/SELE/PLAUR/CD44/CYLD/ICAM1/TNFSF13B/RIPK2/JAK3/CCL2/ZBTB16/IL23A/IL1A/IL1B/ETS1/IL6/NFKBIZ/ADAM8/PLPP3/VCAM1/IL7R/LGALS9/CD47/TNF/LYN/CCL5	26
GO:0030595	leukocyte chemotaxis	24/261	232/18866	1.81473e-14	7.71427e-12	5.1785e-12	CX3CL1/SLC12A2/CXCL2/CCL2/IL23A/CCL20/CXCL6/IL1B/DYSF/IL6/THBS1/ADAM8/CXCL3/CXCL5/CXCL1/GREM1/LGALS9/CXCL10/CXCL11/CXCL8/SAA1/CSF1/LYN/CCL5	24
GO:0070555	response to interleukin-1	23/261	211/18866	2.10389e-14	8.19817e-12	5.50334e-12	CX3CL1/SELE/ICAM1/NFKBIA/RIPK2/CCL2/NFKB1/IL1A/CCL20/GBP3/GBP1/IL1B/IRAK2/ETS1/IL6/IL1RN/GBP2/ZC3H12A/NKX3-1/LGALS9/CXCL8/CD47/CCL5	23
GO:0034612	response to tumor necrosis factor	27/261	320/18866	6.02612e-14	1.99261e-11	1.33762e-11	CX3CL1/SELE/BIRC3/TRAF1/CYLD/ICAM1/NFKBIA/TNFSF13B/CCL2/NFKB1/CCL20/GBP3/GBP1/TNFAIP3/GCH1/THBS1/TNFRSF21/PID1/GBP2/CLDN1/ZC3H12A/NKX3-1/CXCL8/LTA/LTB/TNF/CCL5	27
GO:0097529	myeloid leukocyte migration	23/261	222/18866	6.30813e-14	1.99261e-11	1.33762e-11	CX3CL1/CXCL2/CCL2/IL23A/CCL20/CXCL6/IL1B/DYSF/IL6/THBS1/ADAM8/CXCL3/CXCL5/CXCL1/GREM1/CXCL10/CXCL11/CXCL8/SAA1/CSF1/CD47/LYN/CCL5	23
GO:0050729	positive regulation of inflammatory response	20/261	158/18866	6.39204e-14	1.99261e-11	1.33762e-11	CX3CL1/NFKBIA/IL23A/IL1B/C3/LDLR/ETS1/IL6/TLR2/NFKBIZ/TNIP1/ADAM8/GBP5/ITGA2/GPRC5B/CD47/C2CD4A/C2CD4B/LTA/TNF	20
GO:0034341	response to interferon-gamma	22/261	202/18866	8.06045e-14	2.35567e-11	1.58133e-11	CX3CL1/CD44/ICAM1/CCL2/CCL20/GBP3/GBP1/MT2A/IRF1/GCH1/TRIM22/OASL/TLR2/GBP5/GBP2/GBP4/VCAM1/CLDN1/LGALS9/CD47/HLA-F/CCL5	22
GO:0071346	cellular response to interferon-gamma	21/261	182/18866	9.57859e-14	2.63467e-11	1.76863e-11	CX3CL1/CD44/ICAM1/CCL2/CCL20/GBP3/GBP1/MT2A/IRF1/TRIM22/OASL/TLR2/GBP5/GBP2/GBP4/VCAM1/CLDN1/LGALS9/CD47/HLA-F/CCL5	21
GO:1903037	regulation of leukocyte cell-cell adhesion	27/261	329/18866	1.17894e-13	3.05433e-11	2.05034e-11	SELE/CD44/CEACAM1/CYLD/ICAM1/TNFSF13B/RIPK2/JAK3/CCL2/ZBTB16/IL23A/IL1A/IRF1/IL1B/ETS1/IL6/NFKBIZ/TNFRSF21/ADAM8/VCAM1/ZC3H12A/IL7R/LGALS9/CD47/TNF/LYN/CCL5	27
GO:0031349	positive regulation of defense response	29/261	385/18866	1.24107e-13	3.05433e-11	2.05034e-11	CX3CL1/NFKBIA/RIPK2/RELB/DHX58/NFKB1/IL23A/IL1B/C3/LDLR/ETS1/IL6/TLR2/NFKBIZ/TNIP1/ADAM8/GBP5/ITGA2/CLEC4E/GPRC5B/CD47/C2CD4A/HLA-F/C2CD4B/LTA/TNF/LYN/IKBKE/CCL5	29
GO:0071621	granulocyte chemotaxis	18/261	127/18866	1.62637e-13	3.80245e-11	2.55254e-11	CX3CL1/CXCL2/CCL2/IL23A/CCL20/CXCL6/IL1B/DYSF/THBS1/CXCL3/CXCL5/CXCL1/CXCL10/CXCL11/CXCL8/SAA1/CSF1/CCL5	18
GO:0007159	leukocyte cell-cell adhesion	28/261	364/18866	2.01162e-13	4.47921e-11	3.00684e-11	SELE/CD44/CEACAM1/CYLD/ICAM1/TNFSF13B/RIPK2/JAK3/CCL2/ZBTB16/IL23A/IL1A/IRF1/IL1B/ETS1/IL6/NFKBIZ/TNIP1/TNFRSF21/ADAM8/VCAM1/ZC3H12A/IL7R/LGALS9/CD47/TNF/LYN/CCL5	28
GO:1903039	positive regulation of leukocyte cell-cell adhesion	23/261	235/18866	2.1307e-13	4.52871e-11	3.04007e-11	SELE/CD44/CYLD/ICAM1/TNFSF13B/RIPK2/JAK3/CCL2/ZBTB16/IL23A/IL1A/IL1B/ETS1/IL6/NFKBIZ/ADAM8/VCAM1/IL7R/LGALS9/CD47/TNF/LYN/CCL5	23
GO:0060326	cell chemotaxis	26/261	311/18866	2.23741e-13	4.54875e-11	3.05353e-11	CX3CL1/SLC12A2/CXCL2/CCL2/IL23A/CCL20/CXCL6/IL1B/KDR/DOCK4/DYSF/IL6/THBS1/ADAM8/CXCL3/CXCL5/CXCL1/GREM1/LGALS9/CXCL10/CXCL11/CXCL8/SAA1/CSF1/LYN/CCL5	26
GO:0097530	granulocyte migration	19/261	150/18866	2.72548e-13	5.31015e-11	3.56464e-11	CX3CL1/CXCL2/CCL2/IL23A/CCL20/CXCL6/IL1B/DYSF/THBS1/ADAM8/CXCL3/CXCL5/CXCL1/CXCL10/CXCL11/CXCL8/SAA1/CSF1/CCL5	19
GO:0071356	cellular response to tumor necrosis factor	25/261	297/18866	5.68606e-13	1.06352e-10	7.1393e-11	CX3CL1/BIRC3/TRAF1/CYLD/ICAM1/NFKBIA/TNFSF13B/CCL2/NFKB1/CCL20/GBP3/GBP1/TNFAIP3/THBS1/TNFRSF21/PID1/GBP2/CLDN1/ZC3H12A/NKX3-1/CXCL8/LTA/LTB/TNF/CCL5	25
GO:0030593	neutrophil chemotaxis	16/261	103/18866	8.72067e-13	1.56838e-10	1.05284e-10	CX3CL1/CXCL2/CCL2/IL23A/CCL20/CXCL6/IL1B/DYSF/CXCL3/CXCL5/CXCL1/CXCL10/CXCL11/CXCL8/SAA1/CCL5	16
GO:1990266	neutrophil migration	17/261	122/18866	1.03868e-12	1.77063e-10	1.1886e-10	CX3CL1/CXCL2/CCL2/IL23A/CCL20/CXCL6/IL1B/DYSF/ADAM8/CXCL3/CXCL5/CXCL1/CXCL10/CXCL11/CXCL8/SAA1/CCL5	17
GO:0071347	cellular response to interleukin-1	20/261	183/18866	1.06026e-12	1.77063e-10	1.1886e-10	CX3CL1/ICAM1/NFKBIA/RIPK2/CCL2/NFKB1/IL1A/CCL20/GBP3/GBP1/IL1B/IRAK2/IL6/IL1RN/GBP2/ZC3H12A/NKX3-1/CXCL8/CD47/CCL5	20
GO:0032102	negative regulation of response to external stimulus	29/261	433/18866	2.36457e-12	3.81267e-10	2.5594e-10	CX3CL1/PLAUR/SLC12A2/SEMA3A/SEMA3C/CEACAM1/ANGPT2/PLAT/CCL2/DHX58/NFKB1/TNFAIP3/PLAU/TNFAIP6/LDLR/ETS1/SERPINE2/THBS1/SEMA6C/PHLDB2/SEMA3D/ZC3H12A/GREM1/LGALS9/TRIB1/SAA1/C1QTNF1/HLA-F/TNF	29
GO:0051090	regulation of DNA-binding transcription factor activity	29/261	455/18866	7.9868e-12	1.24488e-09	8.35671e-10	CX3CL1/TRAF1/NFKB2/CYLD/ICAM1/NFKBIA/RIPK2/DDX58/CSF3/NFKB1/TNFAIP3/IL1B/ID1/TRIM22/IRAK2/BHLHE40/IL6/TLR2/NFKBIE/ADAM8/PLPP3/ZC3H12A/GREM1/NKX3-1/LGALS9/TRIB1/FOSL1/ROR1/TNF	29
GO:0002687	positive regulation of leukocyte migration	17/261	142/18866	1.27296e-11	1.92012e-09	1.28896e-09	CX3CL1/SELE/KITLG/ICAM1/IL23A/CCL20/DYSF/IL6/THBS1/ADAM8/ITGA2/LGALS9/CXCL10/CXCL8/CSF1/TNF/CCL5	17
GO:0002685	regulation of leukocyte migration	20/261	212/18866	1.63808e-11	2.39364e-09	1.60682e-09	CX3CL1/SELE/KITLG/ICAM1/CCL2/IL23A/CCL20/DYSF/IL6/THBS1/ADAM8/ITGA2/GREM1/LGALS9/CXCL10/CXCL8/CSF1/TNF/LYN/CCL5	20
GO:0031663	lipopolysaccharide-mediated signaling pathway	12/261	59/18866	2.40094e-11	3.40206e-09	2.28376e-09	CX3CL1/NFKBIA/RIPK2/CCL2/TNFAIP3/IL1B/IRAK2/TLR2/TRIB1/TNF/LYN/CCL5	12
GO:0001819	positive regulation of cytokine production	28/261	447/18866	2.82072e-11	3.87932e-09	2.60414e-09	CX3CL1/BIRC3/POU2F2/NFKB2/P2RX7/RIPK2/DDX58/DHX58/NFKB1/IL23A/IL1A/IFIH1/IRF1/IL1B/C3/IL6/TLR2/THBS1/ADAM8/GBP5/CLEC4E/GPRC5B/LGALS9/SAA1/HLA-F/LTA/LTB/TNF	28
GO:1990868	response to chemokine	14/261	97/18866	6.6789e-11	8.45301e-09	5.67441e-09	CX3CL1/SLC12A2/CXCL2/CCL2/CCL20/CXCL6/CXCL3/CXCL5/CXCL1/ZC3H12A/CXCL10/CXCL11/CXCL8/CCL5	14
GO:1990869	cellular response to chemokine	14/261	97/18866	6.6789e-11	8.45301e-09	5.67441e-09	CX3CL1/SLC12A2/CXCL2/CCL2/CCL20/CXCL6/CXCL3/CXCL5/CXCL1/ZC3H12A/CXCL10/CXCL11/CXCL8/CCL5	14
GO:1903708	positive regulation of hemopoiesis	19/261	204/18866	6.68865e-11	8.45301e-09	5.67441e-09	KITLG/CYLD/JAG1/CA2/RIPK2/CSF3/ZBTB16/IL23A/IL1A/INHBA/IL1B/ETS1/NFKBIZ/ADAM8/IL7R/LGALS9/TRIB1/CSF1/TNF	19
GO:0051607	defense response to virus	21/261	258/18866	8.24396e-11	1.01444e-08	6.80983e-09	BIRC3/DDX58/DHX58/IL23A/IFIH1/GBP3/GBP1/TNFAIP3/IFIT3/IFIT2/IRF1/IL1B/TRIM22/OASL/IL6/RTP4/ZC3H12A/CXCL10/ISG20/MX2/APOBEC3G	21
GO:0042110	T cell activation	28/261	483/18866	1.69875e-10	2.03676e-08	1.36725e-08	CD44/CEACAM1/CYLD/P2RX7/ICAM1/TNFSF13B/RIPK2/RELB/JAK3/CCL2/ZBTB16/IL23A/IL1A/IRF1/IL1B/IL6/NFKBIZ/TNFRSF21/ADAM8/VCAM1/ZC3H12A/CLEC4E/IL7R/LGALS9/HSH2D/CD47/LYN/CCL5	28
GO:0002819	regulation of adaptive immune response	17/261	168/18866	1.89014e-10	2.18953e-08	1.46981e-08	CEACAM1/P2RX7/TNFSF13B/RIPK2/JAK3/IL23A/TNFAIP3/IRF1/IL1B/C3/IL6/NFKBIZ/ZC3H12A/IL7R/HLA-F/LTA/TNF	17
GO:0051091	positive regulation of DNA-binding transcription factor activity	21/261	270/18866	1.91982e-10	2.18953e-08	1.46981e-08	CX3CL1/TRAF1/NFKB2/ICAM1/RIPK2/DDX58/CSF3/NFKB1/IL1B/TRIM22/IRAK2/IL6/TLR2/ADAM8/PLPP3/GREM1/NKX3-1/LGALS9/FOSL1/ROR1/TNF	21
GO:0002460	adaptive immune response based on somatic recombination of immune receptors built from immunoglobulin superfamily domains	24/261	370/18866	3.92713e-10	4.36474e-08	2.93e-08	POU2F2/NFKB2/CEACAM1/P2RX7/ICAM1/JAG1/TNFSF13B/RIPK2/RELB/JAK3/IL23A/TNFAIP3/IL1B/C3/IL6/IL18BP/NFKBIZ/C1R/ZC3H12A/IL7R/C1S/HLA-F/LTA/TNF	24
GO:0002822	regulation of adaptive immune response based on somatic recombination of immune receptors built from immunoglobulin superfamily domains	16/261	153/18866	4.01377e-10	4.36474e-08	2.93e-08	CEACAM1/P2RX7/TNFSF13B/RIPK2/JAK3/IL23A/TNFAIP3/IL1B/C3/IL6/NFKBIZ/ZC3H12A/IL7R/HLA-F/LTA/TNF	16
GO:0002697	regulation of immune effector process	27/261	470/18866	4.4931e-10	4.77494e-08	3.20536e-08	BIRC3/CEACAM1/P2RX7/ICAM1/RIPK2/JAK3/DDX58/DHX58/IL23A/TNFAIP3/CXCL6/IL1B/C3/IL6/NFKBIZ/C1R/ZC3H12A/GPRC5B/IL7R/LGALS9/C1S/CD47/HLA-F/LTA/TNF/APOBEC3G/LYN	27
GO:0070661	leukocyte proliferation	22/261	313/18866	4.85248e-10	4.95295e-08	3.32486e-08	CX3CL1/KITLG/P2RX7/TNFSF13B/RIPK2/JAK3/IL23A/NPR3/IL1A/TNFAIP3/IRF1/IL1B/IL6/TNFRSF21/VCAM1/GREM1/IL7R/LGALS9/CSF1/LST1/LYN/CCL5	22
GO:0050920	regulation of chemotaxis	19/261	229/18866	4.87245e-10	4.95295e-08	3.32486e-08	SEMA3A/SEMA3C/ANGPT2/CCL2/IL23A/KDR/DYSF/IL6/THBS1/SEMA6C/SEMA3D/ITGA2/GREM1/LGALS9/CXCL10/CXCL8/CSF1/LYN/CCL5	19
GO:0007249	I-kappaB kinase/NF-kappaB signaling	21/261	286/18866	5.53012e-10	5.50188e-08	3.69335e-08	CX3CL1/BIRC3/TRAF1/NFKBIA/RIPK2/RELB/TNFAIP3/TNFSF10/IL1B/TRIM22/IRAK2/TLR2/TNIP1/ZC3H12A/GPRC5B/LGALS9/PER1/TMEM106A/ROR1/TNF/IKBKE	21
GO:1902105	regulation of leukocyte differentiation	21/261	290/18866	7.12291e-10	6.9389e-08	4.65801e-08	KITLG/CEACAM1/CYLD/CA2/RIPK2/JAK3/ZBTB16/IL23A/IL1A/INHBA/IRF1/IL1B/NFKBIZ/ADAM8/ZC3H12A/IL7R/LGALS9/TRIB1/CSF1/TNF/LYN	21
GO:0050870	positive regulation of T cell activation	18/261	214/18866	1.13424e-09	1.08239e-07	7.26597e-08	CYLD/TNFSF13B/RIPK2/JAK3/CCL2/ZBTB16/IL23A/IL1A/IL1B/IL6/NFKBIZ/ADAM8/VCAM1/IL7R/LGALS9/CD47/LYN/CCL5	18
GO:0050863	regulation of T cell activation	22/261	332/18866	1.46825e-09	1.37311e-07	9.21754e-08	CEACAM1/CYLD/TNFSF13B/RIPK2/JAK3/CCL2/ZBTB16/IL23A/IL1A/IRF1/IL1B/IL6/NFKBIZ/TNFRSF21/ADAM8/VCAM1/ZC3H12A/IL7R/LGALS9/CD47/LYN/CCL5	22
GO:0002683	negative regulation of immune system process	26/261	463/18866	1.55759e-09	1.4281e-07	9.58665e-08	CX3CL1/KITLG/CEACAM1/NFKBIA/JAK3/CCL2/DHX58/ZBTB16/GBP1/TNFAIP3/INHBA/IRF1/LDLR/THBS1/TNFRSF21/TSC22D3/ZC3H12A/GREM1/IL7R/LGALS9/TRIB1/CD47/LST1/HLA-F/TNF/LYN	26
GO:0032635	interleukin-6 production	16/261	170/18866	1.91068e-09	1.71814e-07	1.15337e-07	CX3CL1/POU2F2/P2RX7/RIPK2/DDX58/IL1A/IFIH1/TNFAIP3/IL1B/IL6/TLR2/ZC3H12A/LGALS9/TMEM106A/CD47/TNF	16
GO:0002831	regulation of response to biotic stimulus	24/261	409/18866	2.90369e-09	2.56183e-07	1.71972e-07	CX3CL1/BIRC3/CEACAM1/RIPK2/RELB/DDX58/DHX58/NFKB1/IL23A/TNFAIP3/CXCL6/IRF1/IL1B/ADAM8/GBP5/ZC3H12A/CLEC4E/LGALS9/TRIB1/HLA-F/APOBEC3G/LYN/IKBKE/CCL5	24
GO:0002221	pattern recognition receptor signaling pathway	17/261	201/18866	3.05845e-09	2.62543e-07	1.76243e-07	BIRC3/CYLD/NFKBIA/RIPK2/DDX58/DHX58/IFIH1/TNFAIP3/IRF1/IRAK2/TLR2/TNIP1/CTSS/CLEC4E/LACC1/LYN/IKBKE	17
GO:0070098	chemokine-mediated signaling pathway	12/261	88/18866	3.08809e-09	2.62543e-07	1.76243e-07	CX3CL1/CXCL2/CCL2/CCL20/CXCL6/CXCL3/CXCL5/CXCL1/CXCL10/CXCL11/CXCL8/CCL5	12
GO:0071887	leukocyte apoptotic process	13/261	108/18866	3.23181e-09	2.69856e-07	1.81151e-07	KITLG/P2RX7/JAK3/IL6/TNFRSF21/ADAM8/BCL2L11/TSC22D3/IL7R/LGALS9/HSH2D/LYN/CCL5	13
GO:0070227	lymphocyte apoptotic process	11/261	73/18866	4.80249e-09	3.93973e-07	2.6447e-07	P2RX7/JAK3/TNFRSF21/ADAM8/BCL2L11/TSC22D3/IL7R/LGALS9/HSH2D/LYN/CCL5	11
GO:0032675	regulation of interleukin-6 production	15/261	159/18866	5.99255e-09	4.6702e-07	3.13505e-07	CX3CL1/POU2F2/P2RX7/RIPK2/DDX58/IL1A/IFIH1/TNFAIP3/IL1B/IL6/TLR2/ZC3H12A/LGALS9/CD47/TNF	15
GO:0051092	positive regulation of NF-kappaB transcription factor activity	15/261	159/18866	5.99255e-09	4.6702e-07	3.13505e-07	CX3CL1/TRAF1/NFKB2/ICAM1/RIPK2/NFKB1/IL1B/TRIM22/IRAK2/TLR2/ADAM8/GREM1/LGALS9/ROR1/TNF	15
GO:1902107	positive regulation of leukocyte differentiation	15/261	159/18866	5.99255e-09	4.6702e-07	3.13505e-07	KITLG/CYLD/CA2/RIPK2/ZBTB16/IL23A/IL1A/IL1B/NFKBIZ/ADAM8/IL7R/LGALS9/TRIB1/CSF1/TNF	15
GO:0001818	negative regulation of cytokine production	22/261	360/18866	6.53746e-09	5.01134e-07	3.36406e-07	CX3CL1/HDAC9/NAV3/CEACAM1/CYLD/RELB/JAK3/DDX58/DHX58/NFKB1/IL23A/IFIH1/GBP1/TNFAIP3/INHBA/THBS1/TNFRSF21/ZC3H12A/LGALS9/HLA-F/TNF/IKBKE	22
GO:0070663	regulation of leukocyte proliferation	18/261	240/18866	7.0381e-09	5.27009e-07	3.53775e-07	KITLG/TNFSF13B/RIPK2/JAK3/IL23A/IL1A/TNFAIP3/IRF1/IL1B/IL6/TNFRSF21/VCAM1/GREM1/LGALS9/CSF1/LST1/LYN/CCL5	18
GO:1903706	regulation of hemopoiesis	26/261	498/18866	7.10042e-09	5.27009e-07	3.53775e-07	KITLG/CEACAM1/CYLD/NFKBIA/JAG1/CA2/RIPK2/JAK3/CSF3/ZBTB16/IL23A/IL1A/INHBA/IRF1/IL1B/ETS1/THBS1/NFKBIZ/ADAM8/ZC3H12A/IL7R/LGALS9/TRIB1/CSF1/TNF/LYN	26
GO:0071674	mononuclear cell migration	12/261	97/18866	9.60113e-09	7.01483e-07	4.70898e-07	CX3CL1/CCL2/CCL20/IL6/THBS1/GREM1/CXCL10/CSF1/CD47/TNF/LYN/CCL5	12
GO:0045765	regulation of angiogenesis	23/261	403/18866	1.06161e-08	7.63707e-07	5.12668e-07	CX3CL1/E2F2/HDAC9/SLC12A2/CEACAM1/ANGPT2/IL1A/TNFAIP3/IL1B/C3/ID1/KDR/ETS1/IL6/THBS1/WARS1/HMGA2/ZC3H12A/GREM1/CXCL10/CXCL8/LRG1/TNF	23
GO:0032612	interleukin-1 production	13/261	121/18866	1.31304e-08	9.30267e-07	6.24478e-07	CX3CL1/CEACAM1/P2RX7/RIPK2/TNFAIP3/IL1B/IL6/GBP5/ZC3H12A/LGALS9/SAA1/TMEM106A/TNF	13
GO:1901342	regulation of vasculature development	24/261	444/18866	1.43252e-08	9.99769e-07	6.71134e-07	CX3CL1/E2F2/HDAC9/SLC12A2/CEACAM1/ANGPT2/SOD2/IL1A/TNFAIP3/IL1B/C3/ID1/KDR/ETS1/IL6/THBS1/WARS1/HMGA2/ZC3H12A/GREM1/CXCL10/CXCL8/LRG1/TNF	24
GO:0019915	lipid storage	11/261	81/18866	1.48417e-08	1.02059e-06	6.85108e-07	NFKBIA/SQLE/PLA2G4C/NFKB1/IL1B/C3/DYSF/IL6/ZC3H12A/TNF/IKBKE	11
GO:0042116	macrophage activation	12/261	101/18866	1.52884e-08	1.03607e-06	6.955e-07	SLC7A2/CX3CL1/NAMPT/CD93/LDLR/DYSF/IL6/TLR2/THBS1/ZC3H12A/TMEM106A/TNF	12
GO:0061041	regulation of wound healing	14/261	151/18866	2.42794e-08	1.62186e-06	1.08874e-06	PLAUR/SLC12A2/CEACAM1/PLAT/TNFAIP3/PLAU/SERPINE2/THBS1/PHLDB2/PLPP3/CLDN1/C1QTNF1/TNF/LYN	14
GO:0001776	leukocyte homeostasis	11/261	86/18866	2.8177e-08	1.85571e-06	1.24572e-06	KITLG/P2RX7/TNFSF13B/JAK3/TNFAIP3/CXCL6/IL6/BCL2L11/TSC22D3/LGALS9/LYN	11
GO:0002753	cytoplasmic pattern recognition receptor signaling pathway	10/261	68/18866	3.10589e-08	2.01711e-06	1.35406e-06	BIRC3/CYLD/NFKBIA/RIPK2/DDX58/DHX58/IFIH1/TNFAIP3/IRAK2/LACC1	10
GO:0030198	extracellular matrix organization	22/261	395/18866	3.47175e-08	2.22382e-06	1.49283e-06	CD44/ADAMTS6/LAMC2/NTN4/NFKB2/B4GALT1/ICAM1/KDR/ETS1/IL6/THBS1/PHLDB2/ADAM8/ABI3BP/VCAM1/CTSS/PTX3/ITGA2/GREM1/CD47/LAMB3/TNF	22
GO:0032755	positive regulation of interleukin-6 production	11/261	88/18866	3.59754e-08	2.26381e-06	1.51967e-06	POU2F2/P2RX7/RIPK2/DDX58/IL1A/IFIH1/IL1B/IL6/TLR2/LGALS9/TNF	11
GO:0043062	extracellular structure organization	22/261	396/18866	3.63101e-08	2.26381e-06	1.51967e-06	CD44/ADAMTS6/LAMC2/NTN4/NFKB2/B4GALT1/ICAM1/KDR/ETS1/IL6/THBS1/PHLDB2/ADAM8/ABI3BP/VCAM1/CTSS/PTX3/ITGA2/GREM1/CD47/LAMB3/TNF	22
GO:0002703	regulation of leukocyte mediated immunity	16/261	211/18866	4.2303e-08	2.60275e-06	1.7472e-06	CEACAM1/P2RX7/ICAM1/JAK3/DDX58/IL23A/CXCL6/IL1B/C3/IL6/IL7R/LGALS9/HLA-F/LTA/TNF/LYN	16
GO:0002526	acute inflammatory response	12/261	111/18866	4.4756e-08	2.71791e-06	1.8245e-06	B4GALT1/ICAM1/IL1A/IL1B/C3/SAA2/IL6/ADAM8/SAA1/C2CD4A/C2CD4B/TNF	12
GO:0050663	cytokine secretion	10/261	72/18866	5.45663e-08	3.27118e-06	2.19591e-06	HDAC9/P2RX7/IL1A/DYSF/TLR2/CLEC4E/SAA1/TMEM106A/TNF/LYN	10
GO:0070228	regulation of lymphocyte apoptotic process	9/261	56/18866	6.9472e-08	4.11204e-06	2.76037e-06	P2RX7/JAK3/ADAM8/TSC22D3/IL7R/LGALS9/HSH2D/LYN/CCL5	9
GO:0043122	regulation of I-kappaB kinase/NF-kappaB signaling	17/261	252/18866	8.80547e-08	5.1468e-06	3.45499e-06	CX3CL1/BIRC3/TRAF1/RIPK2/TNFAIP3/TNFSF10/IL1B/TRIM22/TNIP1/ZC3H12A/GPRC5B/LGALS9/PER1/TMEM106A/ROR1/TNF/IKBKE	17
GO:0060759	regulation of response to cytokine stimulus	15/261	196/18866	1.00041e-07	5.77523e-06	3.87685e-06	BIRC3/TRAF1/CYLD/RIPK2/DDX58/IFIH1/TNFAIP3/IRAK2/IL6/IL1RN/TLR2/CSF1/TNF/IKBKE/CCL5	15
GO:0061045	negative regulation of wound healing	10/261	78/18866	1.19063e-07	6.78949e-06	4.55771e-06	PLAUR/SLC12A2/CEACAM1/PLAT/PLAU/SERPINE2/THBS1/PHLDB2/C1QTNF1/TNF	10
GO:0060055	angiogenesis involved in wound healing	7/261	30/18866	1.38829e-07	7.82128e-06	5.25034e-06	CX3CL1/SLC12A2/B4GALT1/TNFAIP3/KDR/ETS1/TNF	7
GO:0031589	cell-substrate adhesion	20/261	359/18866	1.48312e-07	8.25603e-06	5.54218e-06	CX3CL1/CD44/LIMS2/NTN4/ANGPT2/JAG1/GBP1/PLAU/ID1/KDR/THBS1/SMAD6/PHLDB2/BCL2L11/ABI3BP/VCAM1/ITGA2/GREM1/CSF1/LAMB3	20
GO:0002688	regulation of leukocyte chemotaxis	12/261	124/18866	1.5417e-07	8.48117e-06	5.69332e-06	CCL2/IL23A/DYSF/IL6/THBS1/GREM1/LGALS9/CXCL10/CXCL8/CSF1/LYN/CCL5	12
GO:0032479	regulation of type I interferon production	12/261	125/18866	1.68471e-07	9.12014e-06	6.12225e-06	NFKB2/CYLD/RIPK2/RELB/DDX58/DHX58/NFKB1/IFIH1/TNFAIP3/IRF1/TLR2/IKBKE	12
GO:0045580	regulation of T cell differentiation	13/261	150/18866	1.71637e-07	9.12014e-06	6.12225e-06	CYLD/RIPK2/JAK3/ZBTB16/IL23A/IL1A/IRF1/IL1B/NFKBIZ/ADAM8/ZC3H12A/IL7R/LGALS9	13
GO:0070665	positive regulation of leukocyte proliferation	13/261	150/18866	1.71637e-07	9.12014e-06	6.12225e-06	KITLG/TNFSF13B/RIPK2/JAK3/IL23A/IL1A/IL1B/IL6/VCAM1/LGALS9/CSF1/LYN/CCL5	13
GO:0002675	positive regulation of acute inflammatory response	7/261	31/18866	1.77215e-07	9.31077e-06	6.25022e-06	IL1B/C3/IL6/ADAM8/C2CD4A/C2CD4B/TNF	7
GO:1904018	positive regulation of vasculature development	16/261	235/18866	1.87547e-07	9.7441e-06	6.54111e-06	CX3CL1/HDAC9/CEACAM1/ANGPT2/SOD2/IL1A/IL1B/C3/KDR/ETS1/THBS1/HMGA2/ZC3H12A/GREM1/CXCL8/LRG1	16
GO:0032606	type I interferon production	12/261	127/18866	2.00669e-07	1.03113e-05	6.92187e-06	NFKB2/CYLD/RIPK2/RELB/DDX58/DHX58/NFKB1/IFIH1/TNFAIP3/IRF1/TLR2/IKBKE	12
GO:0050866	negative regulation of cell activation	15/261	207/18866	2.04243e-07	1.03809e-05	6.96856e-06	CX3CL1/CEACAM1/JAK3/TNFAIP3/INHBA/IRF1/LDLR/SERPINE2/TNFRSF21/ZC3H12A/LGALS9/C1QTNF1/LST1/HLA-F/LYN	15
GO:0030098	lymphocyte differentiation	20/261	368/18866	2.20758e-07	1.10996e-05	7.45105e-06	POU2F2/HDAC9/CYLD/RIPK2/RELB/JAK3/ZBTB16/IL23A/IL1A/INHBA/IRF1/IL1B/IL6/NFKBIZ/ADAM8/VCAM1/ZC3H12A/CLEC4E/IL7R/LGALS9	20
GO:0002824	positive regulation of adaptive immune response based on somatic recombination of immune receptors built from immunoglobulin superfamily domains	11/261	105/18866	2.27659e-07	1.13248e-05	7.60222e-06	P2RX7/TNFSF13B/RIPK2/IL23A/IL1B/C3/IL6/NFKBIZ/HLA-F/LTA/TNF	11
GO:0045619	regulation of lymphocyte differentiation	14/261	181/18866	2.36033e-07	1.16178e-05	7.7989e-06	CYLD/RIPK2/JAK3/ZBTB16/IL23A/IL1A/INHBA/IRF1/IL1B/NFKBIZ/ADAM8/ZC3H12A/IL7R/LGALS9	14
GO:0046209	nitric oxide metabolic process	10/261	84/18866	2.42923e-07	1.18324e-05	7.94293e-06	SLC7A2/ICAM1/IL1B/GCH1/TLR2/PTX3/ZC3H12A/TMEM106A/CD47/TNF	10
GO:0032611	interleukin-1 beta production	11/261	106/18866	2.50945e-07	1.20971e-05	8.12065e-06	CX3CL1/P2RX7/RIPK2/TNFAIP3/IL1B/IL6/GBP5/ZC3H12A/LGALS9/TMEM106A/TNF	11
GO:0048247	lymphocyte chemotaxis	9/261	65/18866	2.6301e-07	1.24226e-05	8.33913e-06	CX3CL1/SLC12A2/CCL2/CCL20/ADAM8/CXCL10/CXCL11/SAA1/CCL5	9
GO:0098586	cellular response to virus	9/261	65/18866	2.6301e-07	1.24226e-05	8.33913e-06	BIRC3/POU2F2/DDX58/DHX58/IFIH1/IL6/ZC3H12A/LGALS9/IKBKE	9
GO:1903034	regulation of response to wounding	14/261	183/18866	2.7017e-07	1.26331e-05	8.48049e-06	PLAUR/SLC12A2/CEACAM1/PLAT/TNFAIP3/PLAU/SERPINE2/THBS1/PHLDB2/PLPP3/CLDN1/C1QTNF1/TNF/LYN	14
GO:0070372	regulation of ERK1 and ERK2 cascade	18/261	306/18866	2.85736e-07	1.32287e-05	8.88029e-06	CX3CL1/CD44/CEACAM1/ICAM1/RIPK2/CCL2/CCL20/GBP1/DUSP4/IL1B/KDR/PDGFC/TNIP1/CNKSR3/LGALS9/TNF/LYN/CCL5	18
GO:1903900	regulation of viral life cycle	13/261	157/18866	2.92094e-07	1.33905e-05	8.98891e-06	LAMP3/TRIM22/OASL/TNIP1/HMGA2/PTX3/ZC3H12A/LGALS9/CXCL8/ISG20/TNF/APOBEC3G/CCL5	13
GO:2000106	regulation of leukocyte apoptotic process	10/261	86/18866	3.04077e-07	1.37548e-05	9.23343e-06	KITLG/P2RX7/JAK3/ADAM8/TSC22D3/IL7R/LGALS9/HSH2D/LYN/CCL5	10
GO:0019058	viral life cycle	19/261	341/18866	3.05923e-07	1.37548e-05	9.23343e-06	LAMP3/ICAM1/CCL2/LDLR/TRIM22/OASL/TNIP1/HMGA2/NFIA/CLDN1/PTX3/ZC3H12A/ITGA2/LGALS9/CXCL8/ISG20/TNF/APOBEC3G/CCL5	19
GO:2001233	regulation of apoptotic signaling pathway	21/261	413/18866	3.29019e-07	1.46523e-05	9.83593e-06	CX3CL1/PLAUR/CD44/TRAF1/CYLD/ICAM1/BMF/SOD2/IL1A/TNFAIP3/TNFSF10/INHBA/G0S2/IL1B/THBS1/BCL2L11/NR4A2/MSX1/NKX3-1/LGALS9/TNF	21
GO:0002286	T cell activation involved in immune response	11/261	109/18866	3.33949e-07	1.47316e-05	9.88914e-06	CEACAM1/ICAM1/RIPK2/RELB/JAK3/IL23A/IL6/NFKBIZ/ZC3H12A/CLEC4E/LGALS9	11
GO:2001057	reactive nitrogen species metabolic process	10/261	87/18866	3.3943e-07	1.48334e-05	9.95749e-06	SLC7A2/ICAM1/IL1B/GCH1/TLR2/PTX3/ZC3H12A/TMEM106A/CD47/TNF	10
GO:0002821	positive regulation of adaptive immune response	11/261	110/18866	3.66565e-07	1.58709e-05	1.0654e-05	P2RX7/TNFSF13B/RIPK2/IL23A/IL1B/C3/IL6/NFKBIZ/HLA-F/LTA/TNF	11
GO:0032944	regulation of mononuclear cell proliferation	15/261	221/18866	4.74627e-07	2.03611e-05	1.36682e-05	TNFSF13B/RIPK2/JAK3/IL23A/IL1A/IRF1/IL1B/IL6/TNFRSF21/VCAM1/LGALS9/CSF1/LST1/LYN/CCL5	15
GO:0030217	T cell differentiation	16/261	253/18866	5.08433e-07	2.1613e-05	1.45086e-05	CYLD/RIPK2/RELB/JAK3/ZBTB16/IL23A/IL1A/IRF1/IL1B/IL6/NFKBIZ/ADAM8/ZC3H12A/CLEC4E/IL7R/LGALS9	16
GO:0060333	interferon-gamma-mediated signaling pathway	10/261	91/18866	5.19472e-07	2.18833e-05	1.469e-05	CD44/ICAM1/GBP1/MT2A/IRF1/TRIM22/OASL/GBP2/VCAM1/HLA-F	10
GO:0002699	positive regulation of immune effector process	15/261	223/18866	5.32477e-07	2.20385e-05	1.47942e-05	P2RX7/RIPK2/DDX58/DHX58/IL23A/IL1B/C3/IL6/NFKBIZ/GPRC5B/LGALS9/HLA-F/LTA/TNF/LYN	15
GO:0032943	mononuclear cell proliferation	17/261	286/18866	5.32582e-07	2.20385e-05	1.47942e-05	P2RX7/TNFSF13B/RIPK2/JAK3/IL23A/IL1A/IRF1/IL1B/IL6/TNFRSF21/VCAM1/IL7R/LGALS9/CSF1/LST1/LYN/CCL5	17
GO:0002292	T cell differentiation involved in immune response	9/261	71/18866	5.70033e-07	2.33813e-05	1.56956e-05	RIPK2/RELB/JAK3/IL23A/IL6/NFKBIZ/ZC3H12A/CLEC4E/LGALS9	9
GO:0045582	positive regulation of T cell differentiation	10/261	92/18866	5.75805e-07	2.34127e-05	1.57167e-05	CYLD/RIPK2/ZBTB16/IL23A/IL1A/IL1B/NFKBIZ/ADAM8/IL7R/LGALS9	10
GO:0048872	homeostasis of number of cells	16/261	256/18866	5.95155e-07	2.39909e-05	1.61048e-05	KITLG/CYLD/P2RX7/TNFSF13B/JAK3/TNFAIP3/INHBA/CXCL6/ETS1/IL6/BCL2L11/TSC22D3/IL7R/LGALS9/CSF1/LYN	16
GO:0051251	positive regulation of lymphocyte activation	19/261	357/18866	6.14427e-07	2.45561e-05	1.64842e-05	CYLD/TNFSF13B/RIPK2/JAK3/CCL2/ZBTB16/IL23A/IL1A/IL1B/IL6/NFKBIZ/ADAM8/VCAM1/IL7R/LGALS9/CD47/HLA-F/LYN/CCL5	19
GO:1903035	negative regulation of response to wounding	10/261	93/18866	6.37411e-07	2.52588e-05	1.69559e-05	PLAUR/SLC12A2/CEACAM1/PLAT/PLAU/SERPINE2/THBS1/PHLDB2/C1QTNF1/TNF	10
GO:0070423	nucleotide-binding oligomerization domain containing signaling pathway	7/261	37/18866	6.46387e-07	2.53992e-05	1.70502e-05	BIRC3/CYLD/NFKBIA/RIPK2/TNFAIP3/IRAK2/LACC1	7
GO:0051235	maintenance of location	18/261	324/18866	6.59193e-07	2.56865e-05	1.72431e-05	CX3CL1/P2RX7/NFKBIA/SQLE/PLA2G4C/NFKB1/IL1B/C3/DYSF/IL6/NFKBIE/ZC3H12A/CXCL10/CXCL11/INSIG1/TNF/LYN/IKBKE	18
GO:0070371	ERK1 and ERK2 cascade	18/261	325/18866	6.89298e-07	2.66377e-05	1.78816e-05	CX3CL1/CD44/CEACAM1/ICAM1/RIPK2/CCL2/CCL20/GBP1/DUSP4/IL1B/KDR/PDGFC/TNIP1/CNKSR3/LGALS9/TNF/LYN/CCL5	18
GO:1905954	positive regulation of lipid localization	10/261	94/18866	7.04706e-07	2.70099e-05	1.81314e-05	P2RX7/NFKBIA/LIPG/NFKB1/IL1B/C3/ZC3H12A/NKX3-1/C1QTNF1/IKBKE	10
GO:0060337	type I interferon signaling pathway	10/261	95/18866	7.78131e-07	2.90305e-05	1.94879e-05	IFI35/IFIT3/IFIT2/IRF1/OASL/GBP2/ISG20/MX2/HLA-F/IKBKE	10
GO:0071357	cellular response to type I interferon	10/261	95/18866	7.78131e-07	2.90305e-05	1.94879e-05	IFI35/IFIT3/IFIT2/IRF1/OASL/GBP2/ISG20/MX2/HLA-F/IKBKE	10
GO:1905952	regulation of lipid localization	13/261	171/18866	7.79698e-07	2.90305e-05	1.94879e-05	P2RX7/NFKBIA/LIPG/NFKB1/IL1B/C3/IL6/THBS1/ZC3H12A/NKX3-1/C1QTNF1/TNF/IKBKE	13
GO:0035872	nucleotide-binding domain, leucine rich repeat containing receptor signaling pathway	7/261	38/18866	7.8305e-07	2.90305e-05	1.94879e-05	BIRC3/CYLD/NFKBIA/RIPK2/TNFAIP3/IRAK2/LACC1	7
GO:0097191	extrinsic apoptotic signaling pathway	15/261	230/18866	7.88469e-07	2.90305e-05	1.94879e-05	CX3CL1/KITLG/TRAF1/CYLD/P2RX7/ICAM1/IL1A/TNFAIP3/TNFSF10/INHBA/G0S2/IL1B/THBS1/BCL2L11/TNF	15
GO:0043903	regulation of symbiotic process	15/261	231/18866	8.32924e-07	3.03246e-05	2.03566e-05	LAMP3/CXCL6/TRIM22/OASL/TNIP1/HMGA2/BCL2L11/PTX3/ZC3H12A/LGALS9/CXCL8/ISG20/TNF/APOBEC3G/CCL5	15
GO:0032655	regulation of interleukin-12 production	8/261	55/18866	8.36585e-07	3.03246e-05	2.03566e-05	RIPK2/JAK3/IL23A/TLR2/THBS1/LGALS9/CD47/LTB	8
GO:0048660	regulation of smooth muscle cell proliferation	13/261	173/18866	8.89914e-07	3.20095e-05	2.14876e-05	CX3CL1/NAMPT/SOD2/NPR3/TNFAIP3/IL6/THBS1/ITGA2/APLN/TRIB1/ERN1/TNF/CCL5	13
GO:0048659	smooth muscle cell proliferation	13/261	175/18866	1.01382e-06	3.61878e-05	2.42925e-05	CX3CL1/NAMPT/SOD2/NPR3/TNFAIP3/IL6/THBS1/ITGA2/APLN/TRIB1/ERN1/TNF/CCL5	13
GO:0045444	fat cell differentiation	15/261	235/18866	1.03419e-06	3.64635e-05	2.44776e-05	JAG1/ZBTB16/DYSF/IL6/SMAD6/JDP2/HMGA2/NR4A2/ZC3H12A/LRG1/INSIG1/LAMB3/DIO2/TNF/CCDC71L	15
GO:0002696	positive regulation of leukocyte activation	20/261	406/18866	1.03714e-06	3.64635e-05	2.44776e-05	CYLD/TNFSF13B/RIPK2/JAK3/CCL2/ZBTB16/IL23A/IL1A/IL1B/IL6/THBS1/NFKBIZ/ADAM8/VCAM1/IL7R/LGALS9/CD47/HLA-F/LYN/CCL5	20
GO:0032615	interleukin-12 production	8/261	57/18866	1.10859e-06	3.86848e-05	2.59687e-05	RIPK2/JAK3/IL23A/TLR2/THBS1/LGALS9/CD47/LTB	8
GO:0034340	response to type I interferon	10/261	99/18866	1.14296e-06	3.94972e-05	2.6514e-05	IFI35/IFIT3/IFIT2/IRF1/OASL/GBP2/ISG20/MX2/HLA-F/IKBKE	10
GO:0014015	positive regulation of gliogenesis	9/261	77/18866	1.14876e-06	3.94972e-05	2.6514e-05	CX3CL1/IL1B/SERPINE2/IL6/TLR2/CSF1/LTA/TNF/LYN	9
GO:0045766	positive regulation of angiogenesis	14/261	208/18866	1.27113e-06	4.33855e-05	2.91242e-05	CX3CL1/HDAC9/ANGPT2/IL1A/IL1B/C3/KDR/ETS1/THBS1/HMGA2/ZC3H12A/GREM1/CXCL8/LRG1	14
GO:0042102	positive regulation of T cell proliferation	10/261	101/18866	1.37579e-06	4.62821e-05	3.10687e-05	TNFSF13B/RIPK2/JAK3/IL23A/IL1A/IL1B/IL6/VCAM1/LGALS9/CCL5	10
GO:0045639	positive regulation of myeloid cell differentiation	10/261	101/18866	1.37579e-06	4.62821e-05	3.10687e-05	KITLG/JAG1/CA2/CSF3/IL23A/INHBA/ETS1/TRIB1/CSF1/TNF	10
GO:0002573	myeloid leukocyte differentiation	14/261	210/18866	1.42433e-06	4.75725e-05	3.19349e-05	KITLG/CEACAM1/CA2/RELB/CSF3/IL23A/INHBA/TLR2/BATF2/JUNB/TRIB1/CSF1/TNF/LYN	14
GO:0050707	regulation of cytokine secretion	8/261	59/18866	1.4526e-06	4.81729e-05	3.23379e-05	HDAC9/P2RX7/IL1A/TLR2/CLEC4E/SAA1/TNF/LYN	8
GO:0014066	regulation of phosphatidylinositol 3-kinase signaling	11/261	127/18866	1.55508e-06	5.08501e-05	3.41351e-05	CEACAM1/CSF3/KDR/SERPINE2/IER3/PDGFC/NKX3-1/ROR1/TNF/LYN/CCL5	11
GO:0019079	viral genome replication	11/261	127/18866	1.55508e-06	5.08501e-05	3.41351e-05	CCL2/OASL/TNIP1/HMGA2/NFIA/ZC3H12A/CXCL8/ISG20/TNF/APOBEC3G/CCL5	11
GO:0014065	phosphatidylinositol 3-kinase signaling	12/261	154/18866	1.60607e-06	5.21526e-05	3.50095e-05	CEACAM1/CSF3/KDR/SERPINE2/IER3/PDGFC/NKX3-1/IRS1/ROR1/TNF/LYN/CCL5	12
GO:0014013	regulation of gliogenesis	11/261	128/18866	1.68072e-06	5.42003e-05	3.63841e-05	CX3CL1/IL1B/LDLR/SERPINE2/IL6/TLR2/TNFRSF21/CSF1/LTA/TNF/LYN	11
GO:0002695	negative regulation of leukocyte activation	13/261	184/18866	1.78312e-06	5.67202e-05	3.80756e-05	CX3CL1/CEACAM1/JAK3/TNFAIP3/INHBA/IRF1/LDLR/TNFRSF21/ZC3H12A/LGALS9/LST1/HLA-F/LYN	13
GO:0038061	NIK/NF-kappaB signaling	13/261	184/18866	1.78312e-06	5.67202e-05	3.80756e-05	BIRC3/NFKB2/CYLD/NFKBIA/RELB/IL23A/IL1B/TLR2/ZC3H12A/GREM1/LGALS9/TNF/IKBKE	13
GO:0050867	positive regulation of cell activation	20/261	421/18866	1.81195e-06	5.72479e-05	3.84299e-05	CYLD/TNFSF13B/RIPK2/JAK3/CCL2/ZBTB16/IL23A/IL1A/IL1B/IL6/THBS1/NFKBIZ/ADAM8/VCAM1/IL7R/LGALS9/CD47/HLA-F/LYN/CCL5	20
GO:0045071	negative regulation of viral genome replication	8/261	61/18866	1.8836e-06	5.91122e-05	3.96814e-05	OASL/TNIP1/HMGA2/ZC3H12A/ISG20/TNF/APOBEC3G/CCL5	8
GO:0045621	positive regulation of lymphocyte differentiation	10/261	105/18866	1.96818e-06	6.13548e-05	4.11868e-05	CYLD/RIPK2/ZBTB16/IL23A/IL1A/IL1B/NFKBIZ/ADAM8/IL7R/LGALS9	10
GO:0009306	protein secretion	21/261	462/18866	2.00309e-06	6.20296e-05	4.16398e-05	POU2F2/HDAC9/SLC12A2/P2RX7/TNFSF13B/IL1A/IL1B/RHBDF2/DYSF/IL6/IL1RN/TLR2/CACNA1A/ADAM8/CLEC4E/IRS1/SAA1/TMEM106A/TNF/LYN/CCL5	21
GO:0035592	establishment of protein localization to extracellular region	21/261	463/18866	2.07256e-06	6.37585e-05	4.28004e-05	POU2F2/HDAC9/SLC12A2/P2RX7/TNFSF13B/IL1A/IL1B/RHBDF2/DYSF/IL6/IL1RN/TLR2/CACNA1A/ADAM8/CLEC4E/IRS1/SAA1/TMEM106A/TNF/LYN/CCL5	21
GO:0002260	lymphocyte homeostasis	8/261	62/18866	2.13702e-06	6.4772e-05	4.34807e-05	P2RX7/TNFSF13B/JAK3/TNFAIP3/BCL2L11/TSC22D3/LGALS9/LYN	8
GO:0002294	CD4-positive, alpha-beta T cell differentiation involved in immune response	8/261	62/18866	2.13702e-06	6.4772e-05	4.34807e-05	RIPK2/RELB/JAK3/IL23A/IL6/NFKBIZ/ZC3H12A/LGALS9	8
GO:0046632	alpha-beta T cell differentiation	10/261	106/18866	2.14706e-06	6.4772e-05	4.34807e-05	RIPK2/RELB/JAK3/ZBTB16/IL23A/IRF1/IL6/NFKBIZ/ZC3H12A/LGALS9	10
GO:0046651	lymphocyte proliferation	16/261	283/18866	2.22495e-06	6.66914e-05	4.47692e-05	P2RX7/TNFSF13B/RIPK2/JAK3/IL23A/IL1A/IRF1/IL1B/IL6/TNFRSF21/VCAM1/IL7R/LGALS9/LST1/LYN/CCL5	16
GO:0050670	regulation of lymphocyte proliferation	14/261	219/18866	2.33824e-06	6.96407e-05	4.67491e-05	TNFSF13B/RIPK2/JAK3/IL23A/IL1A/IRF1/IL1B/IL6/TNFRSF21/VCAM1/LGALS9/LST1/LYN/CCL5	14
GO:0002287	alpha-beta T cell activation involved in immune response	8/261	63/18866	2.41884e-06	7.11352e-05	4.77523e-05	RIPK2/RELB/JAK3/IL23A/IL6/NFKBIZ/ZC3H12A/LGALS9	8
GO:0002293	alpha-beta T cell differentiation involved in immune response	8/261	63/18866	2.41884e-06	7.11352e-05	4.77523e-05	RIPK2/RELB/JAK3/IL23A/IL6/NFKBIZ/ZC3H12A/LGALS9	8
GO:0030099	myeloid cell differentiation	20/261	431/18866	2.58949e-06	7.56778e-05	5.08017e-05	KITLG/CEACAM1/NFKBIA/JAG1/CA2/RELB/JAK3/CSF3/ZBTB16/IL23A/INHBA/ETS1/TLR2/THBS1/BATF2/JUNB/TRIB1/CSF1/TNF/LYN	20
GO:0071692	protein localization to extracellular region	21/261	470/18866	2.6237e-06	7.62013e-05	5.11531e-05	POU2F2/HDAC9/SLC12A2/P2RX7/TNFSF13B/IL1A/IL1B/RHBDF2/DYSF/IL6/IL1RN/TLR2/CACNA1A/ADAM8/CLEC4E/IRS1/SAA1/TMEM106A/TNF/LYN/CCL5	21
GO:2001236	regulation of extrinsic apoptotic signaling pathway	12/261	162/18866	2.735e-06	7.89437e-05	5.2994e-05	CX3CL1/TRAF1/CYLD/ICAM1/IL1A/TNFAIP3/TNFSF10/INHBA/G0S2/IL1B/THBS1/TNF	12
GO:0003158	endothelium development	11/261	135/18866	2.83869e-06	8.14339e-05	5.46657e-05	CEACAM1/ICAM1/JAG1/IL1B/ID1/KDR/CLDN1/SOX17/ATOH8/CXCL10/TNF	11
GO:0048015	phosphatidylinositol-mediated signaling	13/261	192/18866	2.86401e-06	8.16592e-05	5.48169e-05	CEACAM1/CSF3/NPR3/KDR/SERPINE2/IER3/PDGFC/NKX3-1/IRS1/ROR1/TNF/LYN/CCL5	13
GO:1903901	negative regulation of viral life cycle	9/261	86/18866	2.93867e-06	8.32793e-05	5.59045e-05	OASL/TNIP1/HMGA2/PTX3/ZC3H12A/ISG20/TNF/APOBEC3G/CCL5	9
GO:0032728	positive regulation of interferon-beta production	6/261	30/18866	2.97426e-06	8.32793e-05	5.59045e-05	RIPK2/DDX58/DHX58/IFIH1/IRF1/TLR2	6
GO:0034110	regulation of homotypic cell-cell adhesion	6/261	30/18866	2.97426e-06	8.32793e-05	5.59045e-05	PLAUR/CEACAM1/SERPINE2/C1QTNF1/LYN/CCL5	6
GO:1901653	cellular response to peptide	19/261	398/18866	3.07813e-06	8.56746e-05	5.75124e-05	HDAC9/CEACAM1/ICAM1/CA2/RIPK2/JAK3/NAMPT/NFKB1/IL1B/ID1/GDF15/CACNA1A/BCL2L11/NR4A2/PID1/VCAM1/IRS1/INSIG1/LYN	19
GO:0032652	regulation of interleukin-1 production	10/261	111/18866	3.27015e-06	9.01498e-05	6.05166e-05	CX3CL1/CEACAM1/P2RX7/RIPK2/TNFAIP3/IL6/ZC3H12A/LGALS9/SAA1/TNF	10
GO:0032946	positive regulation of mononuclear cell proliferation	11/261	137/18866	3.27747e-06	9.01498e-05	6.05166e-05	TNFSF13B/RIPK2/JAK3/IL23A/IL1A/IL1B/IL6/VCAM1/LGALS9/CSF1/CCL5	11
GO:0042098	T cell proliferation	13/261	195/18866	3.39941e-06	9.24166e-05	6.20383e-05	P2RX7/TNFSF13B/RIPK2/JAK3/IL23A/IL1A/IRF1/IL1B/IL6/TNFRSF21/VCAM1/LGALS9/CCL5	13
GO:0050731	positive regulation of peptidyl-tyrosine phosphorylation	13/261	195/18866	3.39941e-06	9.24166e-05	6.20383e-05	CD44/KITLG/ICAM1/RIPK2/CSF3/IL23A/IL6/IL24/GREM1/GPRC5B/TNF/LYN/CCL5	13
GO:0050922	negative regulation of chemotaxis	8/261	66/18866	3.46116e-06	9.35514e-05	6.28e-05	SEMA3A/SEMA3C/ANGPT2/CCL2/THBS1/SEMA6C/SEMA3D/GREM1	8
GO:0032480	negative regulation of type I interferon production	7/261	47/18866	3.5093e-06	9.43075e-05	6.33076e-05	CYLD/RELB/DDX58/DHX58/IFIH1/TNFAIP3/IKBKE	7
GO:0010876	lipid localization	20/261	440/18866	3.53657e-06	9.44972e-05	6.34349e-05	CEACAM1/P2RX7/NFKBIA/LIPG/SQLE/PLA2G4C/NFKB1/INHBA/IL1B/C3/LDLR/DYSF/IL6/THBS1/ZC3H12A/NKX3-1/ABCA3/C1QTNF1/TNF/IKBKE	20
GO:0048017	inositol lipid-mediated signaling	13/261	196/18866	3.59663e-06	9.55559e-05	6.41456e-05	CEACAM1/CSF3/NPR3/KDR/SERPINE2/IER3/PDGFC/NKX3-1/IRS1/ROR1/TNF/LYN/CCL5	13
GO:0042129	regulation of T cell proliferation	12/261	167/18866	3.75354e-06	9.91613e-05	6.65659e-05	TNFSF13B/RIPK2/JAK3/IL23A/IL1A/IRF1/IL1B/IL6/TNFRSF21/VCAM1/LGALS9/CCL5	12
GO:0002548	monocyte chemotaxis	8/261	67/18866	3.88391e-06	0.000100895	6.77299e-05	CX3CL1/CCL2/CCL20/IL6/GREM1/CXCL10/LYN/CCL5	8
GO:0045123	cellular extravasation	8/261	67/18866	3.88391e-06	0.000100895	6.77299e-05	CX3CL1/SELE/ICAM1/CCL2/ADAM8/VCAM1/CD47/TNF	8
GO:0072678	T cell migration	8/261	67/18866	3.88391e-06	0.000100895	6.77299e-05	SLC12A2/ICAM1/CCL2/CCL20/ADAM8/CXCL10/CXCL11/CCL5	8
GO:0048762	mesenchymal cell differentiation	14/261	229/18866	3.93843e-06	0.000101746	6.83013e-05	KITLG/SEMA3A/SEMA3C/JAG1/IL1B/IL6/SEMA6C/PHLDB2/HMGA2/DAB2/SEMA3D/MSX1/KBTBD8/GREM1	14
GO:0051051	negative regulation of transport	21/261	483/18866	4.0136e-06	0.000103119	6.92224e-05	HDAC9/CEACAM1/ICAM1/NFKB1/INHBA/IL1B/RHBDF2/DYSF/SERPINE2/TLR2/THBS1/HECW2/PID1/RRAD/LGALS9/IRS1/TCAF2/INSIG1/CD47/HLA-F/TNF	21
GO:0032648	regulation of interferon-beta production	7/261	48/18866	4.06033e-06	0.000103749	6.96457e-05	RIPK2/RELB/DDX58/DHX58/IFIH1/IRF1/TLR2	7
GO:0045637	regulation of myeloid cell differentiation	15/261	263/18866	4.16897e-06	0.000105946	7.11206e-05	KITLG/CEACAM1/NFKBIA/JAG1/CA2/CSF3/ZBTB16/IL23A/INHBA/ETS1/THBS1/TRIB1/CSF1/TNF/LYN	15
GO:0002158	osteoclast proliferation	4/261	9/18866	4.27113e-06	0.000107956	7.24695e-05	NPR3/TNFAIP3/GREM1/CSF1	4
GO:0002673	regulation of acute inflammatory response	7/261	49/18866	4.68157e-06	0.000117064	7.8584e-05	IL1B/C3/IL6/ADAM8/C2CD4A/C2CD4B/TNF	7
GO:0070231	T cell apoptotic process	7/261	49/18866	4.68157e-06	0.000117064	7.8584e-05	JAK3/ADAM8/BCL2L11/TSC22D3/IL7R/LGALS9/CCL5	7
GO:0060252	positive regulation of glial cell proliferation	5/261	19/18866	4.83914e-06	0.000120361	8.07969e-05	IL1B/IL6/LTA/TNF/LYN	5
GO:0031341	regulation of cell killing	9/261	92/18866	5.16547e-06	0.000127798	8.57891e-05	CEACAM1/P2RX7/ICAM1/IL23A/CXCL6/BCL2L11/IL7R/LGALS9/HLA-F	9
GO:0045446	endothelial cell differentiation	10/261	117/18866	5.26318e-06	0.000128851	8.64966e-05	CEACAM1/ICAM1/JAG1/IL1B/ID1/KDR/CLDN1/SOX17/ATOH8/TNF	10
GO:0072676	lymphocyte migration	10/261	117/18866	5.26318e-06	0.000128851	8.64966e-05	CX3CL1/SLC12A2/ICAM1/CCL2/CCL20/ADAM8/CXCL10/CXCL11/SAA1/CCL5	10
GO:0050921	positive regulation of chemotaxis	11/261	144/18866	5.31594e-06	0.000129008	8.66018e-05	IL23A/KDR/DYSF/IL6/THBS1/ITGA2/LGALS9/CXCL10/CXCL8/CSF1/CCL5	11
GO:0014009	glial cell proliferation	7/261	50/18866	5.37994e-06	0.000129008	8.66018e-05	CX3CL1/IL1B/IL6/CSF1/LTA/TNF/LYN	7
GO:0030195	negative regulation of blood coagulation	7/261	50/18866	5.37994e-06	0.000129008	8.66018e-05	PLAUR/CEACAM1/PLAT/PLAU/SERPINE2/THBS1/C1QTNF1	7
GO:0032608	interferon-beta production	7/261	50/18866	5.37994e-06	0.000129008	8.66018e-05	RIPK2/RELB/DDX58/DHX58/IFIH1/IRF1/TLR2	7
GO:0006959	humoral immune response	18/261	377/18866	5.61871e-06	0.000134046	8.99839e-05	POU2F2/CXCL2/CCL2/CXCL6/IL1B/C3/IL6/TNFRSF21/C1R/CXCL3/CXCL5/CXCL1/CXCL10/CXCL11/CXCL8/C1S/LTA/TNF	18
GO:0071706	tumor necrosis factor superfamily cytokine production	10/261	119/18866	6.1281e-06	0.000144811	9.72101e-05	CX3CL1/RIPK2/IL23A/TNFAIP3/TLR2/ADAM8/ZC3H12A/LGALS9/TMEM106A/CD47	10
GO:0071675	regulation of mononuclear cell migration	7/261	51/18866	6.16283e-06	0.000144811	9.72101e-05	THBS1/GREM1/CXCL10/CSF1/TNF/LYN/CCL5	7
GO:1900047	negative regulation of hemostasis	7/261	51/18866	6.16283e-06	0.000144811	9.72101e-05	PLAUR/CEACAM1/PLAT/PLAU/SERPINE2/THBS1/C1QTNF1	7
GO:0002544	chronic inflammatory response	5/261	20/18866	6.3795e-06	0.000149153	0.000100125	TNFAIP3/THBS1/LTA/TNF/CCL5	5
GO:0070232	regulation of T cell apoptotic process	6/261	34/18866	6.43139e-06	0.000149618	0.000100437	JAK3/ADAM8/TSC22D3/IL7R/LGALS9/CCL5	6
GO:0010883	regulation of lipid storage	7/261	52/18866	7.03813e-06	0.000162189	0.000108875	NFKBIA/NFKB1/C3/IL6/ZC3H12A/TNF/IKBKE	7
GO:0002676	regulation of chronic inflammatory response	4/261	10/18866	7.04112e-06	0.000162189	0.000108875	TNFAIP3/LTA/TNF/CCL5	4
GO:0009612	response to mechanical stimulus	13/261	209/18866	7.25482e-06	0.000166292	0.00011163	P2RX7/ANGPT2/NFKBIA/NFKB1/KCNJ2/IRF1/IL1B/ETS1/SERPINE2/THBS1/ITGA2/CXCL10/FOSL1	13
GO:0002690	positive regulation of leukocyte chemotaxis	9/261	96/18866	7.34738e-06	0.000167592	0.000112503	IL23A/DYSF/IL6/THBS1/LGALS9/CXCL10/CXCL8/CSF1/CCL5	9
GO:0050764	regulation of phagocytosis	9/261	97/18866	8.00214e-06	0.000181641	0.000121934	CCL2/IL1B/C3/DYSF/TLR2/PTX3/ITGA2/CD47/TNF	9
GO:0043491	protein kinase B signaling	15/261	278/18866	8.14843e-06	0.000184068	0.000123563	CX3CL1/KITLG/CSF3/CCL2/IL1B/KDR/GDF15/THBS1/FGF5/ADAM8/NKX3-1/IRS1/C1QTNF1/TNF/CCL5	15
GO:0032481	positive regulation of type I interferon production	8/261	74/18866	8.25669e-06	0.000185617	0.000124603	NFKB2/RIPK2/DDX58/DHX58/NFKB1/IFIH1/IRF1/TLR2	8
GO:0022612	gland morphogenesis	10/261	124/18866	8.84743e-06	0.000197945	0.000132879	LIMS2/NTN4/SEMA3A/SEMA3C/CEACAM1/TNFAIP3/IL6/NKX3-1/CSF1/TNF	10
GO:0002224	toll-like receptor signaling pathway	11/261	152/18866	8.92971e-06	0.000198835	0.000133476	BIRC3/NFKBIA/RIPK2/TNFAIP3/IRF1/IRAK2/TLR2/TNIP1/CTSS/LYN/IKBKE	11
GO:0001910	regulation of leukocyte mediated cytotoxicity	8/261	75/18866	9.13318e-06	0.000201447	0.000135229	CEACAM1/P2RX7/ICAM1/IL23A/CXCL6/IL7R/LGALS9/HLA-F	8
GO:0061844	antimicrobial humoral immune response mediated by antimicrobial peptide	8/261	75/18866	9.13318e-06	0.000201447	0.000135229	CXCL2/CXCL6/CXCL3/CXCL5/CXCL1/CXCL10/CXCL11/CXCL8	8
GO:0001959	regulation of cytokine-mediated signaling pathway	12/261	183/18866	9.59893e-06	0.000209741	0.000140797	BIRC3/TRAF1/CYLD/RIPK2/TNFAIP3/IRAK2/IL6/IL1RN/CSF1/TNF/IKBKE/CCL5	12
GO:2001235	positive regulation of apoptotic signaling pathway	12/261	183/18866	9.59893e-06	0.000209741	0.000140797	PLAUR/CYLD/BMF/TNFSF10/INHBA/G0S2/THBS1/BCL2L11/MSX1/NKX3-1/LGALS9/TNF	12
GO:0002706	regulation of lymphocyte mediated immunity	11/261	154/18866	1.0113e-05	0.000218927	0.000146963	CEACAM1/P2RX7/IL23A/IL1B/C3/IL6/IL7R/LGALS9/HLA-F/LTA/TNF	11
GO:0051250	negative regulation of lymphocyte activation	11/261	154/18866	1.0113e-05	0.000218927	0.000146963	CEACAM1/JAK3/TNFAIP3/INHBA/IRF1/TNFRSF21/ZC3H12A/LGALS9/LST1/HLA-F/LYN	11
GO:0045069	regulation of viral genome replication	9/261	100/18866	1.02743e-05	0.000221042	0.000148383	OASL/TNIP1/HMGA2/ZC3H12A/CXCL8/ISG20/TNF/APOBEC3G/CCL5	9
GO:0050819	negative regulation of coagulation	7/261	55/18866	1.03052e-05	0.000221042	0.000148383	PLAUR/CEACAM1/PLAT/PLAU/SERPINE2/THBS1/C1QTNF1	7
GO:0050792	regulation of viral process	13/261	217/18866	1.08753e-05	0.000232206	0.000155877	LAMP3/TRIM22/OASL/TNIP1/HMGA2/PTX3/ZC3H12A/LGALS9/CXCL8/ISG20/TNF/APOBEC3G/CCL5	13
GO:0002285	lymphocyte activation involved in immune response	12/261	187/18866	1.19463e-05	0.000253913	0.000170449	CEACAM1/ICAM1/RIPK2/RELB/JAK3/IL23A/IL6/NFKBIZ/ZC3H12A/CLEC4E/LGALS9/HLA-F	12
GO:0043367	CD4-positive, alpha-beta T cell differentiation	8/261	78/18866	1.22478e-05	0.000257975	0.000173176	RIPK2/RELB/JAK3/IL23A/IL6/NFKBIZ/ZC3H12A/LGALS9	8
GO:0050688	regulation of defense response to virus	8/261	78/18866	1.22478e-05	0.000257975	0.000173176	BIRC3/DDX58/DHX58/IL23A/TNFAIP3/IL1B/ZC3H12A/APOBEC3G	8
GO:0043123	positive regulation of I-kappaB kinase/NF-kappaB signaling	12/261	188/18866	1.26062e-05	0.000264335	0.000177445	CX3CL1/BIRC3/RIPK2/TNFSF10/IL1B/TRIM22/GPRC5B/LGALS9/TMEM106A/ROR1/TNF/IKBKE	12
GO:1904996	positive regulation of leukocyte adhesion to vascular endothelial cell	5/261	23/18866	1.33833e-05	0.000279376	0.000187542	SELE/ICAM1/ETS1/IL6/TNF	5
GO:0006809	nitric oxide biosynthetic process	8/261	79/18866	1.34666e-05	0.000279865	0.000187871	SLC7A2/ICAM1/IL1B/GCH1/PTX3/ZC3H12A/CD47/TNF	8
GO:0002367	cytokine production involved in immune response	9/261	104/18866	1.41439e-05	0.000288808	0.000193874	JAK3/DDX58/IL1B/IL6/TLR2/GPRC5B/LACC1/HLA-F/TNF	9
GO:0002456	T cell mediated immunity	9/261	104/18866	1.41439e-05	0.000288808	0.000193874	CEACAM1/P2RX7/ICAM1/JAG1/IL23A/IL1B/IL6/IL7R/HLA-F	9
GO:0032649	regulation of interferon-gamma production	9/261	104/18866	1.41439e-05	0.000288808	0.000193874	RIPK2/IL23A/INHBA/IL1B/ZC3H12A/LGALS9/CD47/LTA/TNF	9
GO:0048525	negative regulation of viral process	9/261	104/18866	1.41439e-05	0.000288808	0.000193874	OASL/TNIP1/HMGA2/PTX3/ZC3H12A/ISG20/TNF/APOBEC3G/CCL5	9
GO:0042326	negative regulation of phosphorylation	20/261	484/18866	1.44025e-05	0.00029281	0.00019656	CEACAM1/CYLD/P2RX7/GBP1/TNFAIP3/DUSP4/INHBA/IL1B/PTPRB/SMAD6/WARS1/TNIP1/CNKSR3/PID1/PLPP3/ZC3H12A/GREM1/TRIB1/PER1/LYN	20
GO:0001933	negative regulation of protein phosphorylation	19/261	444/18866	1.46059e-05	0.000295659	0.000198472	CEACAM1/CYLD/P2RX7/GBP1/TNFAIP3/DUSP4/IL1B/PTPRB/SMAD6/WARS1/TNIP1/CNKSR3/PID1/PLPP3/ZC3H12A/GREM1/TRIB1/PER1/LYN	19
GO:0044706	multi-multicellular organism process	13/261	226/18866	1.67712e-05	0.000338027	0.000226914	B4GALT1/ANGPT2/PLA2G4C/NAMPT/STC2/IL1B/ETS1/SERPINE2/ITGA2/LGALS9/JUNB/FOSL1/MAFF	13
GO:0050691	regulation of defense response to virus by host	6/261	40/18866	1.7123e-05	0.000342167	0.000229693	DDX58/IL23A/TNFAIP3/IL1B/ZC3H12A/APOBEC3G	6
GO:1902895	positive regulation of pri-miRNA transcription by RNA polymerase II	6/261	40/18866	1.7123e-05	0.000342167	0.000229693	ETS1/SMAD6/ATOH8/APLN/FOSL1/TNF	6
GO:0030193	regulation of blood coagulation	8/261	82/18866	1.77525e-05	0.000353236	0.000237124	PLAUR/CEACAM1/PLAT/PLAU/SERPINE2/THBS1/C1QTNF1/LYN	8
GO:0032653	regulation of interleukin-10 production	7/261	60/18866	1.84923e-05	0.000363319	0.000243892	JAK3/IL23A/IL6/TLR2/TNFRSF21/LGALS9/CD47	7
GO:0042093	T-helper cell differentiation	7/261	60/18866	1.84923e-05	0.000363319	0.000243892	RIPK2/RELB/JAK3/IL23A/IL6/NFKBIZ/ZC3H12A	7
GO:0061900	glial cell activation	7/261	60/18866	1.84923e-05	0.000363319	0.000243892	CX3CL1/NAMPT/IL1B/LDLR/IL6/TLR2/TNF	7
GO:0050730	regulation of peptidyl-tyrosine phosphorylation	14/261	263/18866	1.90204e-05	0.000372132	0.000249808	CD44/KITLG/ICAM1/RIPK2/CSF3/IL23A/IL6/PDGFC/IL24/GREM1/GPRC5B/TNF/LYN/CCL5	14
GO:0050673	epithelial cell proliferation	19/261	453/18866	1.92919e-05	0.000375119	0.000251814	LIMS2/CEACAM1/B4GALT1/CCL2/TNFAIP3/ID1/KDR/FST/DYSF/IL6/THBS1/CLDN1/NKX3-1/ATOH8/LRG1/APLN/ERN1/TNF/CCL5	19
GO:0018108	peptidyl-tyrosine phosphorylation	17/261	374/18866	1.93576e-05	0.000375119	0.000251814	CD44/KITLG/ICAM1/RIPK2/JAK3/CSF3/IL23A/KDR/IL6/PDGFC/IL24/GREM1/GPRC5B/ROR1/TNF/LYN/CCL5	17
GO:1900046	regulation of hemostasis	8/261	83/18866	1.94138e-05	0.000375119	0.000251814	PLAUR/CEACAM1/PLAT/PLAU/SERPINE2/THBS1/C1QTNF1/LYN	8
GO:0050671	positive regulation of lymphocyte proliferation	10/261	136/18866	1.99374e-05	0.000383651	0.000257541	TNFSF13B/RIPK2/JAK3/IL23A/IL1A/IL1B/IL6/VCAM1/LGALS9/CCL5	10
GO:0030522	intracellular receptor signaling pathway	14/261	265/18866	2.06927e-05	0.000396554	0.000266203	BIRC3/CYLD/NFKBIA/RIPK2/DDX58/DHX58/IFIH1/TNFAIP3/IRAK2/DAB2/NR4A2/NKX3-1/PER1/LACC1	14
GO:0007162	negative regulation of cell adhesion	15/261	301/18866	2.08577e-05	0.000398083	0.000267229	CX3CL1/CEACAM1/ANGPT2/JAG1/JAK3/GBP1/IRF1/SERPINE2/IL1RN/THBS1/PHLDB2/TNFRSF21/ZC3H12A/LGALS9/C1QTNF1	15
GO:0018212	peptidyl-tyrosine modification	17/261	377/18866	2.1434e-05	0.00040742	0.000273497	CD44/KITLG/ICAM1/RIPK2/JAK3/CSF3/IL23A/KDR/IL6/PDGFC/IL24/GREM1/GPRC5B/ROR1/TNF/LYN/CCL5	17
GO:0048246	macrophage chemotaxis	6/261	42/18866	2.2866e-05	0.00043288	0.000290588	CX3CL1/CCL2/THBS1/SAA1/CSF1/CCL5	6
GO:0034113	heterotypic cell-cell adhesion	7/261	62/18866	2.30009e-05	0.000433678	0.000291123	CD44/DSP/IL1B/IL1RN/VCAM1/CD47/TNF	7
GO:0033089	positive regulation of T cell differentiation in thymus	4/261	13/18866	2.32002e-05	0.000435679	0.000292466	IL1A/IL1B/ADAM8/IL7R	4
GO:0002791	regulation of peptide secretion	17/261	381/18866	2.45102e-05	0.00045844	0.000307746	HDAC9/SLC12A2/P2RX7/IL1A/IL1B/RHBDF2/IL6/TLR2/CACNA1A/ADAM8/CLEC4E/IRS1/APLN/SAA1/TNF/LYN/CCL5	17
GO:0034109	homotypic cell-cell adhesion	8/261	86/18866	2.52009e-05	0.00046948	0.000315157	PLAUR/CEACAM1/DSP/SERPINE2/PLPP3/C1QTNF1/LYN/CCL5	8
GO:0032613	interleukin-10 production	7/261	63/18866	2.55736e-05	0.000472096	0.000316913	JAK3/IL23A/IL6/TLR2/TNFRSF21/LGALS9/CD47	7
GO:0033091	positive regulation of immature T cell proliferation	3/261	5/18866	2.56442e-05	0.000472096	0.000316913	RIPK2/IL1A/IL1B	3
GO:0070427	nucleotide-binding oligomerization domain containing 1 signaling pathway	3/261	5/18866	2.56442e-05	0.000472096	0.000316913	NFKBIA/RIPK2/TNFAIP3	3
GO:0042063	gliogenesis	15/261	307/18866	2.6238e-05	0.000479253	0.000321718	CX3CL1/CCL2/IL1B/LDLR/SERPINE2/IL6/TLR2/FGF5/TNFRSF21/CSF1/ROR1/DNER/LTA/TNF/LYN	15
GO:0045088	regulation of innate immune response	15/261	307/18866	2.6238e-05	0.000479253	0.000321718	BIRC3/CEACAM1/RELB/DHX58/NFKB1/TNFAIP3/IRF1/ADAM8/GBP5/CLEC4E/LGALS9/HLA-F/LYN/IKBKE/CCL5	15
GO:1903555	regulation of tumor necrosis factor superfamily cytokine production	9/261	113/18866	2.75889e-05	0.000501968	0.000336965	CX3CL1/RIPK2/IL23A/TNFAIP3/TLR2/ADAM8/ZC3H12A/LGALS9/CD47	9
GO:0046637	regulation of alpha-beta T cell differentiation	7/261	64/18866	2.83788e-05	0.000514338	0.000345269	RIPK2/JAK3/ZBTB16/IL23A/NFKBIZ/ZC3H12A/LGALS9	7
GO:0014068	positive regulation of phosphatidylinositol 3-kinase signaling	8/261	88/18866	2.9811e-05	0.000536139	0.000359904	CSF3/KDR/PDGFC/NKX3-1/ROR1/TNF/LYN/CCL5	8
GO:0050818	regulation of coagulation	8/261	88/18866	2.9811e-05	0.000536139	0.000359904	PLAUR/CEACAM1/PLAT/PLAU/SERPINE2/THBS1/C1QTNF1/LYN	8
GO:0042088	T-helper 1 type immune response	6/261	44/18866	3.00662e-05	0.000538657	0.000361595	RIPK2/RELB/JAK3/IL23A/IL1B/IL18BP	6
GO:0032609	interferon-gamma production	9/261	115/18866	3.17271e-05	0.000566243	0.000380113	RIPK2/IL23A/INHBA/IL1B/ZC3H12A/LGALS9/CD47/LTA/TNF	9
GO:0070431	nucleotide-binding oligomerization domain containing 2 signaling pathway	4/261	14/18866	3.21275e-05	0.00057121	0.000383447	NFKBIA/RIPK2/TNFAIP3/LACC1	4
GO:1903532	positive regulation of secretion by cell	15/261	313/18866	3.2809e-05	0.000581117	0.000390097	SLC12A2/P2RX7/IL1A/INHBA/IL1B/IL6/TLR2/ADAM8/CLEC4E/NKX3-1/APLN/SAA1/C1QTNF1/HLA-F/TNF	15
GO:0032640	tumor necrosis factor production	9/261	116/18866	3.39859e-05	0.00059891	0.000402042	CX3CL1/RIPK2/IL23A/TNFAIP3/TLR2/ZC3H12A/LGALS9/TMEM106A/CD47	9
GO:0050708	regulation of protein secretion	16/261	352/18866	3.40697e-05	0.00059891	0.000402042	HDAC9/SLC12A2/P2RX7/IL1A/IL1B/RHBDF2/IL6/TLR2/CACNA1A/ADAM8/CLEC4E/IRS1/SAA1/TNF/LYN/CCL5	16
GO:0032722	positive regulation of chemokine production	6/261	45/18866	3.42929e-05	0.000600576	0.00040316	RIPK2/IL1B/IL6/TLR2/LGALS9/TNF	6
GO:0046631	alpha-beta T cell activation	10/261	146/18866	3.67883e-05	0.000641874	0.000430883	RIPK2/RELB/JAK3/ZBTB16/IL23A/IRF1/IL6/NFKBIZ/ZC3H12A/LGALS9	10
GO:0033002	muscle cell proliferation	13/261	244/18866	3.74282e-05	0.000650611	0.000436748	CX3CL1/NAMPT/SOD2/NPR3/TNFAIP3/IL6/THBS1/ITGA2/APLN/TRIB1/ERN1/TNF/CCL5	13
GO:0034103	regulation of tissue remodeling	8/261	91/18866	3.80357e-05	0.000658722	0.000442193	CEACAM1/P2RX7/CA2/IL23A/TNFAIP3/IL6/ADAM8/GREM1	8
GO:0050918	positive chemotaxis	7/261	67/18866	3.83521e-05	0.00066175	0.000444225	CX3CL1/ANGPT2/KDR/ITGA2/CXCL10/CXCL8/CCL5	7
GO:0048771	tissue remodeling	11/261	178/18866	3.90982e-05	0.000672145	0.000451203	SEMA3C/CEACAM1/P2RX7/JAG1/CA2/IL23A/IL1A/TNFAIP3/IL6/ADAM8/GREM1	11
GO:1901222	regulation of NIK/NF-kappaB signaling	9/261	119/18866	4.15967e-05	0.000712476	0.000478278	CYLD/NFKBIA/IL23A/IL1B/TLR2/ZC3H12A/GREM1/LGALS9/TNF	9
GO:0032642	regulation of chemokine production	7/261	68/18866	4.2254e-05	0.000718471	0.000482302	RIPK2/CXCL6/IL1B/IL6/TLR2/LGALS9/TNF	7
GO:0050766	positive regulation of phagocytosis	7/261	68/18866	4.2254e-05	0.000718471	0.000482302	CCL2/IL1B/C3/PTX3/ITGA2/CD47/TNF	7
GO:0034134	toll-like receptor 2 signaling pathway	4/261	15/18866	4.33347e-05	0.000734178	0.000492846	RIPK2/TNFAIP3/TLR2/LYN	4
GO:0001667	ameboidal-type cell migration	19/261	481/18866	4.36767e-05	0.000737301	0.000494942	HDAC9/KITLG/SEMA3A/SEMA3C/CEACAM1/ANGPT2/ID1/KDR/ETS1/THBS1/SEMA6C/SEMA3D/PLPP3/ZC3H12A/ITGA2/SOX17/GREM1/ATOH8/TNF	19
GO:2000108	positive regulation of leukocyte apoptotic process	5/261	29/18866	4.41345e-05	0.000740365	0.000496999	P2RX7/ADAM8/LGALS9/LYN/CCL5	5
GO:0006953	acute-phase response	6/261	47/18866	4.41749e-05	0.000740365	0.000496999	IL1A/IL1B/SAA2/IL6/SAA1/TNF	6
GO:0048732	gland development	18/261	443/18866	4.83991e-05	0.000808265	0.000542579	LIMS2/NTN4/SEMA3A/SEMA3C/CEACAM1/HMGCS1/TNFAIP3/ETS1/SERPINE2/IL6/BCL2L11/MSX1/CLDN1/ITGA2/NKX3-1/APLN/CSF1/TNF	18
GO:0043370	regulation of CD4-positive, alpha-beta T cell differentiation	6/261	48/18866	4.99056e-05	0.000827512	0.0005555	RIPK2/JAK3/IL23A/NFKBIZ/ZC3H12A/LGALS9	6
GO:0045601	regulation of endothelial cell differentiation	6/261	48/18866	4.99056e-05	0.000827512	0.0005555	CEACAM1/JAG1/IL1B/ID1/ATOH8/TNF	6
GO:0070487	monocyte aggregation	3/261	6/18866	5.07631e-05	0.000838756	0.000563048	CD44/IL1B/CD47	3
GO:0072593	reactive oxygen species metabolic process	14/261	288/18866	5.15107e-05	0.000846107	0.000567982	SLC7A2/P2RX7/ICAM1/SOD2/IL1B/GCH1/TLR2/THBS1/PID1/PTX3/ZC3H12A/TMEM106A/CD47/TNF	14
GO:0043312	neutrophil degranulation	19/261	487/18866	5.15698e-05	0.000846107	0.000567982	PLAUR/CD44/CEACAM1/B4GALT1/DSP/NFKB1/PLAU/TNFAIP6/C3/CD93/PTPRB/TLR2/ADAM8/CTSS/PTX3/CXCL1/LRG1/METTL7A/CD47	19
GO:0010810	regulation of cell-substrate adhesion	12/261	217/18866	5.20037e-05	0.000850242	0.000570758	CX3CL1/LIMS2/ANGPT2/JAG1/GBP1/PLAU/KDR/THBS1/PHLDB2/ABI3BP/GREM1/CSF1	12
GO:0002761	regulation of myeloid leukocyte differentiation	9/261	123/18866	5.39458e-05	0.000878921	0.00059001	KITLG/CEACAM1/CA2/IL23A/INHBA/TRIB1/CSF1/TNF/LYN	9
GO:0002449	lymphocyte mediated immunity	16/261	366/18866	5.42663e-05	0.000881074	0.000591455	POU2F2/CEACAM1/P2RX7/ICAM1/JAG1/IL23A/IL1B/C3/IL6/C1R/IL7R/LGALS9/C1S/HLA-F/LTA/TNF	16
GO:0060485	mesenchyme development	14/261	290/18866	5.55038e-05	0.000898048	0.00060285	KITLG/SEMA3A/SEMA3C/JAG1/IL1B/IL6/SEMA6C/PHLDB2/HMGA2/DAB2/SEMA3D/MSX1/KBTBD8/GREM1	14
GO:0002283	neutrophil activation involved in immune response	19/261	490/18866	5.59731e-05	0.000900224	0.000604311	PLAUR/CD44/CEACAM1/B4GALT1/DSP/NFKB1/PLAU/TNFAIP6/C3/CD93/PTPRB/TLR2/ADAM8/CTSS/PTX3/CXCL1/LRG1/METTL7A/CD47	19
GO:0032663	regulation of interleukin-2 production	6/261	49/18866	5.62159e-05	0.000900224	0.000604311	NAV3/RIPK2/IL1A/GBP1/TNFAIP3/IL1B	6
GO:2000107	negative regulation of leukocyte apoptotic process	6/261	49/18866	5.62159e-05	0.000900224	0.000604311	KITLG/JAK3/TSC22D3/IL7R/HSH2D/CCL5	6
GO:2000027	regulation of animal organ morphogenesis	13/261	254/18866	5.65729e-05	0.00090285	0.000606073	LIMS2/NTN4/SEMA3C/CEACAM1/JAG1/PLEKHA4/TNFAIP3/DAB2/MSX1/GREM1/CSF1/ROR1/TNF	13
GO:0051770	positive regulation of nitric-oxide synthase biosynthetic process	4/261	16/18866	5.71528e-05	0.000909001	0.000610202	NAMPT/CCL2/KDR/TLR2	4
GO:0002698	negative regulation of immune effector process	9/261	124/18866	5.74752e-05	0.000911031	0.000611565	CEACAM1/JAK3/DHX58/ZC3H12A/IL7R/LGALS9/CD47/HLA-F/TNF	9
GO:0032651	regulation of interleukin-1 beta production	8/261	97/18866	6.02315e-05	0.000945109	0.000634441	CX3CL1/P2RX7/RIPK2/TNFAIP3/IL6/ZC3H12A/LGALS9/TNF	8
GO:0035710	CD4-positive, alpha-beta T cell activation	8/261	97/18866	6.02315e-05	0.000945109	0.000634441	RIPK2/RELB/JAK3/IL23A/IL6/NFKBIZ/ZC3H12A/LGALS9	8
GO:0046634	regulation of alpha-beta T cell activation	8/261	97/18866	6.02315e-05	0.000945109	0.000634441	RIPK2/JAK3/ZBTB16/IL23A/IRF1/NFKBIZ/ZC3H12A/LGALS9	8
GO:0070229	negative regulation of lymphocyte apoptotic process	5/261	31/18866	6.1736e-05	0.000965477	0.000648114	JAK3/TSC22D3/IL7R/HSH2D/CCL5	5
GO:0001774	microglial cell activation	6/261	50/18866	6.31481e-05	0.000977749	0.000656352	CX3CL1/NAMPT/LDLR/IL6/TLR2/TNF	6
GO:0002269	leukocyte activation involved in inflammatory response	6/261	50/18866	6.31481e-05	0.000977749	0.000656352	CX3CL1/NAMPT/LDLR/IL6/TLR2/TNF	6
GO:0046850	regulation of bone remodeling	6/261	50/18866	6.31481e-05	0.000977749	0.000656352	P2RX7/CA2/TNFAIP3/IL6/ADAM8/GREM1	6
GO:0002709	regulation of T cell mediated immunity	7/261	73/18866	6.69686e-05	0.00103348	0.000693766	CEACAM1/P2RX7/IL23A/IL1B/IL6/IL7R/HLA-F	7
GO:0050830	defense response to Gram-positive bacterium	8/261	99/18866	6.96773e-05	0.00107175	0.000719452	P2RX7/RIPK2/IL6/TLR2/GBP2/GBP4/LTA/TNF	8
GO:1902893	regulation of pri-miRNA transcription by RNA polymerase II	6/261	51/18866	7.07461e-05	0.00108462	0.000728093	ETS1/SMAD6/ATOH8/APLN/FOSL1/TNF	6
GO:1901889	negative regulation of cell junction assembly	5/261	32/18866	7.23473e-05	0.00110554	0.000742138	IL1B/TLR2/THBS1/PHLDB2/TNF	5
GO:0031649	heat generation	4/261	17/18866	7.39277e-05	0.00112236	0.000753426	IL1A/IL1B/APLN/TNF	4
GO:0046851	negative regulation of bone remodeling	4/261	17/18866	7.39277e-05	0.00112236	0.000753426	P2RX7/TNFAIP3/IL6/GREM1	4
GO:0050777	negative regulation of immune response	10/261	159/18866	7.57727e-05	0.00114664	0.00076973	CEACAM1/JAK3/DHX58/TNFAIP3/ZC3H12A/IL7R/LGALS9/HLA-F/TNF/LYN	10
GO:0048260	positive regulation of receptor-mediated endocytosis	6/261	52/18866	7.90558e-05	0.00118084	0.000792684	SELE/SGIP1/C3/DAB2/GREM1/APLN	6
GO:0071622	regulation of granulocyte chemotaxis	6/261	52/18866	7.90558e-05	0.00118084	0.000792684	IL23A/DYSF/THBS1/CXCL8/CSF1/CCL5	6
GO:2001238	positive regulation of extrinsic apoptotic signaling pathway	6/261	52/18866	7.90558e-05	0.00118084	0.000792684	CYLD/TNFSF10/INHBA/G0S2/THBS1/TNF	6
GO:0032602	chemokine production	7/261	75/18866	7.96878e-05	0.00118084	0.000792684	RIPK2/CXCL6/IL1B/IL6/TLR2/LGALS9/TNF	7
GO:0038034	signal transduction in absence of ligand	7/261	75/18866	7.96878e-05	0.00118084	0.000792684	CX3CL1/KITLG/IL1A/INHBA/IL1B/BCL2L11/TNF	7
GO:0097192	extrinsic apoptotic signaling pathway in absence of ligand	7/261	75/18866	7.96878e-05	0.00118084	0.000792684	CX3CL1/KITLG/IL1A/INHBA/IL1B/BCL2L11/TNF	7
GO:0031098	stress-activated protein kinase signaling cascade	14/261	300/18866	7.98e-05	0.00118084	0.000792684	TRAF1/SEMA3A/CYLD/RIPK2/NFKB1/IL1B/IRAK2/ZC3H12A/LGALS9/TRIB1/ERN1/PER1/TNF/LYN	14
GO:0051047	positive regulation of secretion	15/261	340/18866	8.37828e-05	0.00123586	0.000829621	SLC12A2/P2RX7/IL1A/INHBA/IL1B/IL6/TLR2/ADAM8/CLEC4E/NKX3-1/APLN/SAA1/C1QTNF1/HLA-F/TNF	15
GO:0035234	ectopic germ cell programmed cell death	3/261	7/18866	8.79258e-05	0.00127973	0.000859067	KITLG/IL1A/IL1B	3
GO:0060558	regulation of calcidiol 1-monooxygenase activity	3/261	7/18866	8.79258e-05	0.00127973	0.000859067	NFKB1/IL1B/TNF	3
GO:0043331	response to dsRNA	6/261	53/18866	8.81249e-05	0.00127973	0.000859067	P2RX7/NFKBIA/RIPK2/DDX58/NFKB1/IFIH1	6
GO:0061614	pri-miRNA transcription by RNA polymerase II	6/261	53/18866	8.81249e-05	0.00127973	0.000859067	ETS1/SMAD6/ATOH8/APLN/FOSL1/TNF	6
GO:0061756	leukocyte adhesion to vascular endothelial cell	6/261	53/18866	8.81249e-05	0.00127973	0.000859067	SELE/ICAM1/ETS1/IL6/VCAM1/TNF	6
GO:0043405	regulation of MAP kinase activity	15/261	342/18866	8.94385e-05	0.00129478	0.000869172	KITLG/P2RX7/RIPK2/DUSP4/IL1B/GDF15/IRAK2/THBS1/PDGFC/ADAM8/TRIB1/SAA1/ERN1/TNF/LYN	15
GO:0007160	cell-matrix adhesion	12/261	230/18866	9.08486e-05	0.00131114	0.000880151	CX3CL1/CD44/JAG1/PLAU/KDR/THBS1/PHLDB2/BCL2L11/VCAM1/ITGA2/GREM1/CSF1	12
GO:0048661	positive regulation of smooth muscle cell proliferation	8/261	103/18866	9.22823e-05	0.00132114	0.000886867	CX3CL1/NAMPT/IL6/THBS1/ITGA2/ERN1/TNF/CCL5	8
GO:0070498	interleukin-1-mediated signaling pathway	8/261	103/18866	9.22823e-05	0.00132114	0.000886867	NFKBIA/RIPK2/NFKB1/IL1A/IL1B/IRAK2/IL6/IL1RN	8
GO:0007596	blood coagulation	15/261	343/18866	9.23894e-05	0.00132114	0.000886867	PLAUR/CEACAM1/P2RX7/PLAT/TFPI2/PLAU/IRF1/SERPINE2/IL6/THBS1/ITGA2/SAA1/C1QTNF1/MAFF/LYN	15
GO:0070230	positive regulation of lymphocyte apoptotic process	4/261	18/18866	9.40195e-05	0.00134035	0.000899763	P2RX7/ADAM8/LGALS9/CCL5	4
GO:0150076	neuroinflammatory response	7/261	77/18866	9.43113e-05	0.00134043	0.000899813	CX3CL1/NAMPT/IL1B/LDLR/IL6/TLR2/TNF	7
GO:0050715	positive regulation of cytokine secretion	5/261	34/18866	9.77369e-05	0.00138031	0.000926586	P2RX7/IL1A/CLEC4E/SAA1/TNF	5
GO:0032623	interleukin-2 production	6/261	54/18866	9.80031e-05	0.00138031	0.000926586	NAV3/RIPK2/IL1A/GBP1/TNFAIP3/IL1B	6
GO:0032757	positive regulation of interleukin-8 production	6/261	54/18866	9.80031e-05	0.00138031	0.000926586	DDX58/IL1B/IL6/TLR2/LGALS9/TNF	6
GO:2001234	negative regulation of apoptotic signaling pathway	12/261	233/18866	0.000102725	0.00144247	0.000968314	CX3CL1/PLAUR/CD44/ICAM1/SOD2/IL1A/TNFAIP3/TNFSF10/IL1B/THBS1/NR4A2/TNF	12
GO:0007599	hemostasis	15/261	348/18866	0.000108456	0.00151838	0.00101927	PLAUR/CEACAM1/P2RX7/PLAT/TFPI2/PLAU/IRF1/SERPINE2/IL6/THBS1/ITGA2/SAA1/C1QTNF1/MAFF/LYN	15
GO:0050817	coagulation	15/261	349/18866	0.000111947	0.00154899	0.00103982	PLAUR/CEACAM1/P2RX7/PLAT/TFPI2/PLAU/IRF1/SERPINE2/IL6/THBS1/ITGA2/SAA1/C1QTNF1/MAFF/LYN	15
GO:0001914	regulation of T cell mediated cytotoxicity	5/261	35/18866	0.000112748	0.00154899	0.00103982	CEACAM1/P2RX7/IL23A/IL7R/HLA-F	5
GO:0007435	salivary gland morphogenesis	5/261	35/18866	0.000112748	0.00154899	0.00103982	NTN4/SEMA3A/SEMA3C/NKX3-1/TNF	5
GO:0032735	positive regulation of interleukin-12 production	5/261	35/18866	0.000112748	0.00154899	0.00103982	RIPK2/IL23A/TLR2/LGALS9/LTB	5
GO:0060251	regulation of glial cell proliferation	5/261	35/18866	0.000112748	0.00154899	0.00103982	IL1B/IL6/LTA/TNF/LYN	5
GO:0002708	positive regulation of lymphocyte mediated immunity	8/261	106/18866	0.000112961	0.00154899	0.00103982	P2RX7/IL23A/IL1B/C3/IL6/HLA-F/LTA/TNF	8
GO:2000379	positive regulation of reactive oxygen species metabolic process	8/261	106/18866	0.000112961	0.00154899	0.00103982	ICAM1/IL1B/THBS1/PID1/PTX3/ZC3H12A/TMEM106A/TNF	8
GO:0002922	positive regulation of humoral immune response	4/261	19/18866	0.000117801	0.00160594	0.00107805	IL1B/C3/LTA/TNF	4
GO:0070233	negative regulation of T cell apoptotic process	4/261	19/18866	0.000117801	0.00160594	0.00107805	JAK3/TSC22D3/IL7R/CCL5	4
GO:0014032	neural crest cell development	7/261	80/18866	0.000120279	0.00163496	0.00109753	KITLG/SEMA3A/SEMA3C/JAG1/SEMA6C/SEMA3D/KBTBD8	7
GO:2001237	negative regulation of extrinsic apoptotic signaling pathway	8/261	107/18866	0.00012065	0.00163525	0.00109772	CX3CL1/ICAM1/IL1A/TNFAIP3/TNFSF10/IL1B/THBS1/TNF	8
GO:0052548	regulation of endopeptidase activity	17/261	434/18866	0.000122284	0.0016526	0.00110937	PLAUR/BIRC3/CD44/LAMP3/RIPK2/TFPI2/TNFSF10/C3/SERPINE2/THBS1/TNFAIP8/BCL2L11/TIMP4/NKX3-1/LGALS9/TNF/LYN	17
GO:0001909	leukocyte mediated cytotoxicity	8/261	108/18866	0.000128767	0.00173461	0.00116442	CEACAM1/P2RX7/ICAM1/IL23A/CXCL6/IL7R/LGALS9/HLA-F	8
GO:0034405	response to fluid shear stress	5/261	36/18866	0.000129465	0.00173461	0.00116442	P2RX7/CA2/TFPI2/ETS1/SMAD6	5
GO:0045622	regulation of T-helper cell differentiation	5/261	36/18866	0.000129465	0.00173461	0.00116442	RIPK2/JAK3/IL23A/NFKBIZ/ZC3H12A	5
GO:2000116	regulation of cysteine-type endopeptidase activity	12/261	239/18866	0.000130528	0.00174386	0.00117063	PLAUR/BIRC3/CD44/LAMP3/RIPK2/TNFSF10/THBS1/TNFAIP8/BCL2L11/NKX3-1/LGALS9/TNF	12
GO:0002705	positive regulation of leukocyte mediated immunity	9/261	138/18866	0.000131287	0.001749	0.00117408	P2RX7/DDX58/IL23A/IL1B/C3/IL6/HLA-F/LTA/TNF	9
GO:0050678	regulation of epithelial cell proliferation	16/261	395/18866	0.00013198	0.00175324	0.00117693	LIMS2/CEACAM1/B4GALT1/CCL2/TNFAIP3/ID1/KDR/DYSF/THBS1/CLDN1/NKX3-1/ATOH8/LRG1/APLN/TNF/CCL5	16
GO:0060760	positive regulation of response to cytokine stimulus	6/261	57/18866	0.000133015	0.001757	0.00117945	RIPK2/DDX58/IFIH1/TLR2/CSF1/IKBKE	6
GO:1905517	macrophage migration	6/261	57/18866	0.000133015	0.001757	0.00117945	CX3CL1/CCL2/THBS1/SAA1/CSF1/CCL5	6
GO:0010959	regulation of metal ion transport	16/261	396/18866	0.00013586	0.00178952	0.00120129	CX3CL1/P2RX7/ICAM1/CCL2/STC2/KCNJ2/DYSF/SERPINE2/HECW2/CNKSR3/RRAD/CXCL10/CXCL11/PER1/LYN/CCL5	16
GO:0042493	response to drug	16/261	397/18866	0.000139838	0.00183675	0.00123299	SEMA3C/P2RX7/ICAM1/HMGCS1/INHBA/MT2A/IL1B/THBS1/HMGA2/TIMP4/ITGA2/NKX3-1/ABCA3/FOSL1/LTA/LYN	16
GO:0001906	cell killing	10/261	172/18866	0.00014538	0.00187888	0.00126127	CEACAM1/P2RX7/ICAM1/IL23A/CXCL6/C3/BCL2L11/IL7R/LGALS9/HLA-F	10
GO:0001911	negative regulation of leukocyte mediated cytotoxicity	4/261	20/18866	0.000145656	0.00187888	0.00126127	CEACAM1/IL7R/LGALS9/HLA-F	4
GO:0007252	I-kappaB phosphorylation	4/261	20/18866	0.000145656	0.00187888	0.00126127	CX3CL1/TLR2/TNF/IKBKE	4
GO:0032495	response to muramyl dipeptide	4/261	20/18866	0.000145656	0.00187888	0.00126127	NFKBIA/JAG1/RIPK2/TNFAIP3	4
GO:0051767	nitric-oxide synthase biosynthetic process	4/261	20/18866	0.000145656	0.00187888	0.00126127	NAMPT/CCL2/KDR/TLR2	4
GO:0051769	regulation of nitric-oxide synthase biosynthetic process	4/261	20/18866	0.000145656	0.00187888	0.00126127	NAMPT/CCL2/KDR/TLR2	4
GO:0032680	regulation of tumor necrosis factor production	8/261	110/18866	0.000146355	0.00187888	0.00126127	CX3CL1/RIPK2/IL23A/TNFAIP3/TLR2/ZC3H12A/LGALS9/CD47	8
GO:0002763	positive regulation of myeloid leukocyte differentiation	6/261	58/18866	0.000146662	0.00187888	0.00126127	KITLG/CA2/IL23A/TRIB1/CSF1/TNF	6
GO:0031638	zymogen activation	6/261	58/18866	0.000146662	0.00187888	0.00126127	RIPK2/PLAT/PLAU/SERPINE2/THBS1/C1R	6
GO:1904994	regulation of leukocyte adhesion to vascular endothelial cell	5/261	37/18866	0.000148016	0.00189105	0.00126944	SELE/ICAM1/ETS1/IL6/TNF	5
GO:0002718	regulation of cytokine production involved in immune response	7/261	83/18866	0.000151774	0.00193378	0.00129812	JAK3/DDX58/IL1B/IL6/GPRC5B/HLA-F/TNF	7
GO:0008584	male gonad development	9/261	141/18866	0.000154604	0.00196448	0.00131874	KITLG/SEMA3A/ICAM1/HMGCS1/TNFSF10/INHBA/LHX9/BCL2L11/NKX3-1	9
GO:0043030	regulation of macrophage activation	6/261	59/18866	0.000161394	0.0020452	0.00137292	SLC7A2/CX3CL1/LDLR/IL6/THBS1/ZC3H12A	6
GO:0046546	development of primary male sexual characteristics	9/261	142/18866	0.000163105	0.00205699	0.00138084	KITLG/SEMA3A/ICAM1/HMGCS1/TNFSF10/INHBA/LHX9/BCL2L11/NKX3-1	9
GO:0014031	mesenchymal cell development	7/261	84/18866	0.000163644	0.00205699	0.00138084	KITLG/SEMA3A/SEMA3C/JAG1/SEMA6C/SEMA3D/KBTBD8	7
GO:0048864	stem cell development	7/261	84/18866	0.000163644	0.00205699	0.00138084	KITLG/SEMA3A/SEMA3C/JAG1/SEMA6C/SEMA3D/KBTBD8	7
GO:0043029	T cell homeostasis	5/261	38/18866	0.000168533	0.00211276	0.00141827	P2RX7/JAK3/BCL2L11/TSC22D3/LGALS9	5
GO:0034764	positive regulation of transmembrane transport	11/261	210/18866	0.000171749	0.00214732	0.00144147	CX3CL1/P2RX7/CA2/CCL2/KCNJ2/C3/CNKSR3/CTSS/IRS1/CXCL10/CXCL11	11
GO:0043434	response to peptide hormone	17/261	447/18866	0.00017376	0.00216668	0.00145447	HDAC9/CEACAM1/ICAM1/CA2/JAK3/NFKB1/STC2/TNFSF10/IL1B/GDF15/TLR2/NR4A2/PID1/TIMP4/IRS1/INSIG1/LYN	17
GO:0006970	response to osmotic stress	7/261	85/18866	0.000176255	0.00216728	0.00145487	SLC12A2/RELB/DYSF/TSC22D3/CLDN1/ITGA2/TNF	7
GO:0043154	negative regulation of cysteine-type endopeptidase activity involved in apoptotic process	7/261	85/18866	0.000176255	0.00216728	0.00145487	PLAUR/BIRC3/CD44/LAMP3/THBS1/TNFAIP8/TNF	7
GO:0032732	positive regulation of interleukin-1 production	6/261	60/18866	0.000177272	0.00216728	0.00145487	P2RX7/RIPK2/IL6/LGALS9/SAA1/TNF	6
GO:0035455	response to interferon-alpha	4/261	21/18866	0.00017798	0.00216728	0.00145487	LAMP3/IFIT3/IFIT2/MX2	4
GO:0048305	immunoglobulin secretion	4/261	21/18866	0.00017798	0.00216728	0.00145487	POU2F2/TNFSF13B/IL6/TNF	4
GO:0061042	vascular wound healing	4/261	21/18866	0.00017798	0.00216728	0.00145487	SLC12A2/TNFAIP3/KDR/TNF	4
GO:0072574	hepatocyte proliferation	4/261	21/18866	0.00017798	0.00216728	0.00145487	LIMS2/CEACAM1/TNFAIP3/IL6	4
GO:0072575	epithelial cell proliferation involved in liver morphogenesis	4/261	21/18866	0.00017798	0.00216728	0.00145487	LIMS2/CEACAM1/TNFAIP3/IL6	4
GO:0090330	regulation of platelet aggregation	4/261	21/18866	0.00017798	0.00216728	0.00145487	CEACAM1/SERPINE2/C1QTNF1/LYN	4
GO:0051403	stress-activated MAPK cascade	13/261	286/18866	0.000185544	0.00225352	0.00151276	TRAF1/SEMA3A/CYLD/RIPK2/NFKB1/IL1B/IRAK2/ZC3H12A/LGALS9/TRIB1/ERN1/PER1/TNF	13
GO:0071496	cellular response to external stimulus	14/261	326/18866	0.000190602	0.002286	0.00153457	P2RX7/ICAM1/NAMPT/NFKB1/KCNJ2/IRF1/IL1B/NR4A2/VCAM1/NUAK2/ZC3H12A/ITGA2/FOSL1/LYN	14
GO:0002876	positive regulation of chronic inflammatory response to antigenic stimulus	2/261	2/18866	0.000190668	0.002286	0.00153457	LTA/TNF	2
GO:0045210	FasL biosynthetic process	2/261	2/18866	0.000190668	0.002286	0.00153457	JAK3/PHLDA1	2
GO:0070668	positive regulation of mast cell proliferation	2/261	2/18866	0.000190668	0.002286	0.00153457	KITLG/LYN	2
GO:0090291	negative regulation of osteoclast proliferation	2/261	2/18866	0.000190668	0.002286	0.00153457	TNFAIP3/GREM1	2
GO:0007431	salivary gland development	5/261	39/18866	0.000191152	0.002286	0.00153457	NTN4/SEMA3A/SEMA3C/NKX3-1/TNF	5
GO:0051897	positive regulation of protein kinase B signaling	10/261	178/18866	0.00019233	0.00229422	0.00154008	CX3CL1/KITLG/CSF3/GDF15/THBS1/FGF5/ADAM8/IRS1/C1QTNF1/TNF	10
GO:0033619	membrane protein proteolysis	6/261	61/18866	0.000194359	0.00231252	0.00155237	P2RX7/NFKB1/IL1B/ADAM8/TIMP4/TNF	6
GO:0060556	regulation of vitamin D biosynthetic process	3/261	9/18866	0.000206727	0.00244723	0.0016428	NFKB1/IL1B/TNF	3
GO:0071316	cellular response to nicotine	3/261	9/18866	0.000206727	0.00244723	0.0016428	NFKB1/MSX1/TNF	3
GO:0009896	positive regulation of catabolic process	17/261	454/18866	0.000208646	0.00246371	0.00165386	P2RX7/RIPK2/TNFAIP3/IL1B/KDR/LDLR/TRIM22/IL6/HECW2/ADAM8/DAB2/BCL2L11/ZC3H12A/SOX17/IRS1/TRIB1/TNF	17
GO:0043281	regulation of cysteine-type endopeptidase activity involved in apoptotic process	11/261	215/18866	0.000210758	0.00247614	0.0016622	PLAUR/BIRC3/CD44/LAMP3/TNFSF10/THBS1/TNFAIP8/BCL2L11/NKX3-1/LGALS9/TNF	11
GO:0070374	positive regulation of ERK1 and ERK2 cascade	11/261	215/18866	0.000210758	0.00247614	0.0016622	CX3CL1/CD44/ICAM1/RIPK2/CCL2/CCL20/KDR/PDGFC/LGALS9/TNF/CCL5	11
GO:2000351	regulation of endothelial cell apoptotic process	6/261	62/18866	0.000212719	0.00249291	0.00167347	ICAM1/CCL2/TNFAIP3/KDR/THBS1/TNF	6
GO:0034104	negative regulation of tissue remodeling	4/261	22/18866	0.000215178	0.00250291	0.00168018	P2RX7/TNFAIP3/IL6/GREM1	4
GO:0071359	cellular response to dsRNA	4/261	22/18866	0.000215178	0.00250291	0.00168018	P2RX7/DDX58/NFKB1/IFIH1	4
GO:0072576	liver morphogenesis	4/261	22/18866	0.000215178	0.00250291	0.00168018	LIMS2/CEACAM1/TNFAIP3/IL6	4
GO:0140353	lipid export from cell	5/261	40/18866	0.000216013	0.0025064	0.00168252	P2RX7/INHBA/IL1B/NKX3-1/C1QTNF1	5
GO:0032147	activation of protein kinase activity	14/261	331/18866	0.000222857	0.00257941	0.00173153	P2RX7/RIPK2/IL23A/IL1B/GDF15/IRAK2/THBS1/PDGFC/GREM1/GPRC5B/SAA1/ERN1/TNF/CCL5	14
GO:1904019	epithelial cell apoptotic process	8/261	117/18866	0.000224218	0.00258875	0.0017378	E2F2/ICAM1/CCL2/TNFAIP3/KDR/IL6/THBS1/TNF	8
GO:0045926	negative regulation of growth	12/261	254/18866	0.000229682	0.0026453	0.00177576	SEMA3A/SEMA3C/STC2/INHBA/MT2A/GDF15/SERPINE2/SEMA6C/SEMA3D/MSX1/SOX17/GREM1	12
GO:2000514	regulation of CD4-positive, alpha-beta T cell activation	6/261	63/18866	0.000232418	0.00267024	0.0017925	RIPK2/JAK3/IL23A/NFKBIZ/ZC3H12A/LGALS9	6
GO:0007260	tyrosine phosphorylation of STAT protein	7/261	89/18866	0.000234793	0.00268433	0.00180196	JAK3/IL23A/IL6/IL24/TNF/LYN/CCL5	7
GO:0014033	neural crest cell differentiation	7/261	89/18866	0.000234793	0.00268433	0.00180196	KITLG/SEMA3A/SEMA3C/JAG1/SEMA6C/SEMA3D/KBTBD8	7
GO:0031639	plasminogen activation	4/261	23/18866	0.000257661	0.00291724	0.00195831	PLAT/PLAU/SERPINE2/THBS1	4
GO:0051043	regulation of membrane protein ectodomain proteolysis	4/261	23/18866	0.000257661	0.00291724	0.00195831	IL1B/ADAM8/TIMP4/TNF	4
GO:0060445	branching involved in salivary gland morphogenesis	4/261	23/18866	0.000257661	0.00291724	0.00195831	NTN4/SEMA3A/SEMA3C/TNF	4
GO:0072677	eosinophil migration	4/261	23/18866	0.000257661	0.00291724	0.00195831	CX3CL1/CCL2/ADAM8/CCL5	4
GO:0001837	epithelial to mesenchymal transition	9/261	152/18866	0.000271726	0.00306906	0.00206023	JAG1/IL1B/IL6/PHLDB2/HMGA2/DAB2/MSX1/KBTBD8/GREM1	9
GO:0006509	membrane protein ectodomain proteolysis	5/261	42/18866	0.000273044	0.00307652	0.00206523	P2RX7/IL1B/ADAM8/TIMP4/TNF	5
GO:0032729	positive regulation of interferon-gamma production	6/261	65/18866	0.000276111	0.0031036	0.00208341	RIPK2/IL23A/IL1B/LGALS9/LTA/TNF	6
GO:0052547	regulation of peptidase activity	17/261	466/18866	0.000282773	0.00317085	0.00212856	PLAUR/BIRC3/CD44/LAMP3/RIPK2/TFPI2/TNFSF10/C3/SERPINE2/THBS1/TNFAIP8/BCL2L11/TIMP4/NKX3-1/LGALS9/TNF/LYN	17
GO:0008406	gonad development	11/261	223/18866	0.000288696	0.00322953	0.00216795	KITLG/SEMA3A/ICAM1/HMGCS1/TNFSF10/INHBA/FST/LHX9/BCL2L11/PTX3/NKX3-1	11
GO:0001660	fever generation	3/261	10/18866	0.000292307	0.00325435	0.00218461	IL1A/IL1B/TNF	3
GO:0033083	regulation of immature T cell proliferation	3/261	10/18866	0.000292307	0.00325435	0.00218461	RIPK2/IL1A/IL1B	3
GO:0032768	regulation of monooxygenase activity	6/261	66/18866	0.000300248	0.00333482	0.00223862	NFKB1/NPR3/IL1A/IL1B/GCH1/TNF	6
GO:0002823	negative regulation of adaptive immune response based on somatic recombination of immune receptors built from immunoglobulin superfamily domains	5/261	43/18866	0.000305515	0.00336507	0.00225893	CEACAM1/JAK3/ZC3H12A/IL7R/HLA-F	5
GO:0045124	regulation of bone resorption	5/261	43/18866	0.000305515	0.00336507	0.00225893	P2RX7/CA2/TNFAIP3/IL6/ADAM8	5
GO:0150077	regulation of neuroinflammatory response	5/261	43/18866	0.000305515	0.00336507	0.00225893	CX3CL1/IL1B/LDLR/IL6/TNF	5
GO:0031342	negative regulation of cell killing	4/261	24/18866	0.00030585	0.00336507	0.00225893	CEACAM1/IL7R/LGALS9/HLA-F	4
GO:0002532	production of molecular mediator involved in inflammatory response	7/261	93/18866	0.00030807	0.00336574	0.00225938	SLC7A2/IL6/GBP5/ZC3H12A/PER1/TNF/LYN	7
GO:1904894	positive regulation of receptor signaling pathway via STAT	7/261	93/18866	0.00030807	0.00336574	0.00225938	IL23A/IL6/IL24/IL7R/TNF/LYN/CCL5	7
GO:2000117	negative regulation of cysteine-type endopeptidase activity	7/261	93/18866	0.00030807	0.00336574	0.00225938	PLAUR/BIRC3/CD44/LAMP3/THBS1/TNFAIP8/TNF	7
GO:0007369	gastrulation	10/261	189/18866	0.000311643	0.00339684	0.00228026	DUSP4/INHBA/IL1RN/PHLDB2/HMGA2/ITGA2/SOX17/ATOH8/APLN/LAMB3	10
GO:0043406	positive regulation of MAP kinase activity	12/261	264/18866	0.000326642	0.00355204	0.00238444	KITLG/P2RX7/RIPK2/IL1B/GDF15/IRAK2/THBS1/PDGFC/ADAM8/SAA1/ERN1/TNF	12
GO:1904035	regulation of epithelial cell apoptotic process	7/261	94/18866	0.000328989	0.003565	0.00239315	ICAM1/CCL2/TNFAIP3/KDR/IL6/THBS1/TNF	7
GO:0000187	activation of MAPK activity	9/261	156/18866	0.000329359	0.003565	0.00239315	P2RX7/RIPK2/IL1B/GDF15/IRAK2/THBS1/SAA1/ERN1/TNF	9
GO:0022408	negative regulation of cell-cell adhesion	10/261	191/18866	0.00033889	0.0036597	0.00245672	CEACAM1/JAG1/JAK3/IRF1/SERPINE2/IL1RN/TNFRSF21/ZC3H12A/LGALS9/C1QTNF1	10
GO:0001913	T cell mediated cytotoxicity	5/261	44/18866	0.000340829	0.00366371	0.00245941	CEACAM1/P2RX7/IL23A/IL7R/HLA-F	5
GO:0044060	regulation of endocrine process	5/261	44/18866	0.000340829	0.00366371	0.00245941	INHBA/IL1B/NKX3-1/APLN/C1QTNF1	5
GO:0048545	response to steroid hormone	14/261	346/18866	0.000349354	0.00374674	0.00251515	ICAM1/CA2/IL6/IL1RN/TLR2/THBS1/DAB2/BCL2L11/CLDN1/NKX3-1/ABCA3/FOSL1/PER1/TNF	14
GO:0001952	regulation of cell-matrix adhesion	8/261	125/18866	0.000351805	0.0037564	0.00252163	CX3CL1/JAG1/PLAU/KDR/THBS1/PHLDB2/GREM1/CSF1	8
GO:0010812	negative regulation of cell-substrate adhesion	6/261	68/18866	0.000353468	0.0037564	0.00252163	CX3CL1/ANGPT2/JAG1/GBP1/THBS1/PHLDB2	6
GO:0045428	regulation of nitric oxide biosynthetic process	6/261	68/18866	0.000353468	0.0037564	0.00252163	ICAM1/IL1B/PTX3/ZC3H12A/CD47/TNF	6
GO:0072577	endothelial cell apoptotic process	6/261	68/18866	0.000353468	0.0037564	0.00252163	ICAM1/CCL2/TNFAIP3/KDR/THBS1/TNF	6
GO:1903707	negative regulation of hemopoiesis	9/261	158/18866	0.000361757	0.00382959	0.00257076	CEACAM1/NFKBIA/JAK3/ZBTB16/INHBA/IRF1/ZC3H12A/TRIB1/LYN	9
GO:0045137	development of primary sexual characteristics	11/261	229/18866	0.000361993	0.00382959	0.00257076	KITLG/SEMA3A/ICAM1/HMGCS1/TNFSF10/INHBA/FST/LHX9/BCL2L11/PTX3/NKX3-1	11
GO:0031331	positive regulation of cellular catabolic process	15/261	390/18866	0.000370407	0.00390976	0.00262458	P2RX7/RIPK2/TNFAIP3/IL1B/KDR/LDLR/TRIM22/IL6/ADAM8/DAB2/BCL2L11/ZC3H12A/IRS1/TRIB1/TNF	15
GO:0010001	glial cell differentiation	11/261	230/18866	0.000375612	0.00395577	0.00265547	IL1B/LDLR/SERPINE2/IL6/TLR2/FGF5/TNFRSF21/ROR1/DNER/TNF/LYN	11
GO:0014002	astrocyte development	5/261	45/18866	0.000379146	0.00397508	0.00266843	IL1B/LDLR/IL6/ROR1/TNF	5
GO:1904646	cellular response to amyloid-beta	5/261	45/18866	0.000379146	0.00397508	0.00266843	ICAM1/NAMPT/CACNA1A/BCL2L11/VCAM1	5
GO:0031348	negative regulation of defense response	12/261	269/18866	0.000386893	0.00404723	0.00271686	CX3CL1/CEACAM1/DHX58/NFKB1/TNFAIP3/TNFAIP6/LDLR/ETS1/ZC3H12A/LGALS9/SAA1/HLA-F	12
GO:0031652	positive regulation of heat generation	3/261	11/18866	0.000397818	0.00413377	0.00277496	IL1B/APLN/TNF	3
GO:0033079	immature T cell proliferation	3/261	11/18866	0.000397818	0.00413377	0.00277496	RIPK2/IL1A/IL1B	3
GO:0070673	response to interleukin-18	3/261	11/18866	0.000397818	0.00413377	0.00277496	RIPK2/IL18BP/CLDN1	3
GO:0034763	negative regulation of transmembrane transport	8/261	128/18866	0.000412739	0.00426163	0.00286079	IL1B/DYSF/THBS1/HECW2/PID1/RRAD/TCAF2/TNF	8
GO:1903409	reactive oxygen species biosynthetic process	8/261	128/18866	0.000412739	0.00426163	0.00286079	SLC7A2/ICAM1/IL1B/GCH1/PTX3/ZC3H12A/CD47/TNF	8
GO:0032370	positive regulation of lipid transport	6/261	70/18866	0.000413799	0.00426163	0.00286079	P2RX7/NFKBIA/LIPG/IL1B/NKX3-1/C1QTNF1	6
GO:1904407	positive regulation of nitric oxide metabolic process	5/261	46/18866	0.000420629	0.00426163	0.00286079	ICAM1/IL1B/PTX3/TMEM106A/TNF	5
GO:0001783	B cell apoptotic process	4/261	26/18866	0.000421059	0.00426163	0.00286079	TNFRSF21/BCL2L11/HSH2D/LYN	4
GO:0010884	positive regulation of lipid storage	4/261	26/18866	0.000421059	0.00426163	0.00286079	NFKB1/C3/ZC3H12A/IKBKE	4
GO:0034114	regulation of heterotypic cell-cell adhesion	4/261	26/18866	0.000421059	0.00426163	0.00286079	CD44/IL1B/IL1RN/TNF	4
GO:0042730	fibrinolysis	4/261	26/18866	0.000421059	0.00426163	0.00286079	PLAUR/PLAT/PLAU/THBS1	4
GO:0048843	negative regulation of axon extension involved in axon guidance	4/261	26/18866	0.000421059	0.00426163	0.00286079	SEMA3A/SEMA3C/SEMA6C/SEMA3D	4
GO:0050926	regulation of positive chemotaxis	4/261	26/18866	0.000421059	0.00426163	0.00286079	ANGPT2/KDR/ITGA2/CXCL8	4
GO:0090025	regulation of monocyte chemotaxis	4/261	26/18866	0.000421059	0.00426163	0.00286079	GREM1/CXCL10/LYN/CCL5	4
GO:1905523	positive regulation of macrophage migration	4/261	26/18866	0.000421059	0.00426163	0.00286079	CX3CL1/THBS1/CSF1/CCL5	4
GO:0040013	negative regulation of locomotion	15/261	397/18866	0.00044616	0.00449329	0.00301629	CX3CL1/NAV3/SEMA3A/SEMA3C/ANGPT2/JAG1/CCL2/THBS1/SEMA6C/PHLDB2/SEMA3D/IL24/GREM1/TRIB1/TNF	15
GO:0033627	cell adhesion mediated by integrin	6/261	71/18866	0.00044683	0.00449329	0.00301629	ICAM1/PLAU/PLPP3/ITGA2/LYN/CCL5	6
GO:0042531	positive regulation of tyrosine phosphorylation of STAT protein	6/261	71/18866	0.00044683	0.00449329	0.00301629	IL23A/IL6/IL24/TNF/LYN/CCL5	6
GO:0007044	cell-substrate junction assembly	7/261	99/18866	0.000451334	0.00452883	0.00304015	LAMC2/KDR/THBS1/PHLDB2/ITGA2/GREM1/LAMB3	7
GO:0046638	positive regulation of alpha-beta T cell differentiation	5/261	47/18866	0.000465445	0.00465047	0.00312181	RIPK2/ZBTB16/IL23A/NFKBIZ/LGALS9	5
GO:0060986	endocrine hormone secretion	5/261	47/18866	0.000465445	0.00465047	0.00312181	INHBA/IL1B/NKX3-1/APLN/C1QTNF1	5
GO:0046661	male sex differentiation	9/261	164/18866	0.000475095	0.00473677	0.00317974	KITLG/SEMA3A/ICAM1/HMGCS1/TNFSF10/INHBA/LHX9/BCL2L11/NKX3-1	9
GO:0045807	positive regulation of endocytosis	7/261	100/18866	0.000479672	0.00477222	0.00320354	SELE/SGIP1/C3/DAB2/ITGA2/GREM1/APLN	7
GO:0051271	negative regulation of cellular component movement	15/261	400/18866	0.00048248	0.00478998	0.00321546	CX3CL1/NAV3/SEMA3A/SEMA3C/ANGPT2/JAG1/CCL2/THBS1/SEMA6C/PHLDB2/SEMA3D/IL24/GREM1/TRIB1/TNF	15
GO:2000377	regulation of reactive oxygen species metabolic process	10/261	200/18866	0.000487365	0.00479314	0.00321759	ICAM1/IL1B/GCH1/THBS1/PID1/PTX3/ZC3H12A/TMEM106A/CD47/TNF	10
GO:0002825	regulation of T-helper 1 type immune response	4/261	27/18866	0.00048895	0.00479314	0.00321759	RIPK2/JAK3/IL23A/IL1B	4
GO:0033081	regulation of T cell differentiation in thymus	4/261	27/18866	0.00048895	0.00479314	0.00321759	IL1A/IL1B/ADAM8/IL7R	4
GO:0045672	positive regulation of osteoclast differentiation	4/261	27/18866	0.00048895	0.00479314	0.00321759	CA2/IL23A/CSF1/TNF	4
GO:0048143	astrocyte activation	4/261	27/18866	0.00048895	0.00479314	0.00321759	IL1B/LDLR/IL6/TNF	4
GO:0072539	T-helper 17 cell differentiation	4/261	27/18866	0.00048895	0.00479314	0.00321759	IL23A/IL6/NFKBIZ/ZC3H12A	4
GO:0002820	negative regulation of adaptive immune response	5/261	48/18866	0.000513764	0.00501536	0.00336676	CEACAM1/JAK3/ZC3H12A/IL7R/HLA-F	5
GO:2001239	regulation of extrinsic apoptotic signaling pathway in absence of ligand	5/261	48/18866	0.000513764	0.00501536	0.00336676	CX3CL1/IL1A/INHBA/IL1B/TNF	5
GO:0002863	positive regulation of inflammatory response to antigenic stimulus	3/261	12/18866	0.000525012	0.00508272	0.00341198	C3/LTA/TNF	3
GO:0042368	vitamin D biosynthetic process	3/261	12/18866	0.000525012	0.00508272	0.00341198	NFKB1/IL1B/TNF	3
GO:0043301	negative regulation of leukocyte degranulation	3/261	12/18866	0.000525012	0.00508272	0.00341198	CEACAM1/LGALS9/HLA-F	3
GO:0090331	negative regulation of platelet aggregation	3/261	12/18866	0.000525012	0.00508272	0.00341198	CEACAM1/SERPINE2/C1QTNF1	3
GO:0051961	negative regulation of nervous system development	13/261	319/18866	0.000528554	0.00510644	0.0034279	CX3CL1/SEMA3A/SEMA3C/JAG1/IL1B/ID1/LDLR/IL6/TLR2/SEMA6C/TNFRSF21/SEMA3D/TNF	13
GO:0150115	cell-substrate junction organization	7/261	102/18866	0.000540599	0.00521205	0.00349879	LAMC2/KDR/THBS1/PHLDB2/ITGA2/GREM1/LAMB3	7
GO:0010575	positive regulation of vascular endothelial growth factor production	4/261	28/18866	0.000564285	0.00536479	0.00360132	IL1A/IL1B/C3/IL6	4
GO:0010818	T cell chemotaxis	4/261	28/18866	0.000564285	0.00536479	0.00360132	SLC12A2/CXCL10/CXCL11/CCL5	4
GO:0090200	positive regulation of release of cytochrome c from mitochondria	4/261	28/18866	0.000564285	0.00536479	0.00360132	PLAUR/BMF/TNFSF10/BCL2L11	4
GO:1902668	negative regulation of axon guidance	4/261	28/18866	0.000564285	0.00536479	0.00360132	SEMA3A/SEMA3C/SEMA6C/SEMA3D	4
GO:0002874	regulation of chronic inflammatory response to antigenic stimulus	2/261	3/18866	0.000566768	0.00536479	0.00360132	LTA/TNF	2
GO:0060557	positive regulation of vitamin D biosynthetic process	2/261	3/18866	0.000566768	0.00536479	0.00360132	IL1B/TNF	2
GO:0060559	positive regulation of calcidiol 1-monooxygenase activity	2/261	3/18866	0.000566768	0.00536479	0.00360132	IL1B/TNF	2
GO:1903971	positive regulation of response to macrophage colony-stimulating factor	2/261	3/18866	0.000566768	0.00536479	0.00360132	TLR2/CSF1	2
GO:1903974	positive regulation of cellular response to macrophage colony-stimulating factor stimulus	2/261	3/18866	0.000566768	0.00536479	0.00360132	TLR2/CSF1	2
GO:0032368	regulation of lipid transport	8/261	135/18866	0.000588681	0.00556095	0.00373301	P2RX7/NFKBIA/LIPG/NFKB1/IL1B/THBS1/NKX3-1/C1QTNF1	8
GO:0010631	epithelial cell migration	14/261	365/18866	0.000593902	0.00559896	0.00375852	HDAC9/SEMA3A/CEACAM1/ANGPT2/ID1/KDR/ETS1/THBS1/PLPP3/ZC3H12A/ITGA2/GREM1/ATOH8/TNF	14
GO:0002711	positive regulation of T cell mediated immunity	5/261	50/18866	0.000621603	0.00584832	0.00392591	P2RX7/IL23A/IL1B/IL6/HLA-F	5
GO:1902106	negative regulation of leukocyte differentiation	7/261	105/18866	0.000643378	0.00602939	0.00404747	CEACAM1/JAK3/INHBA/IRF1/ZC3H12A/TRIB1/LYN	7
GO:0090132	epithelium migration	14/261	368/18866	0.000643428	0.00602939	0.00404747	HDAC9/SEMA3A/CEACAM1/ANGPT2/ID1/KDR/ETS1/THBS1/PLPP3/ZC3H12A/ITGA2/GREM1/ATOH8/TNF	14
GO:0001782	B cell homeostasis	4/261	29/18866	0.000647509	0.00604308	0.00405665	TNFSF13B/TNFAIP3/BCL2L11/LYN	4
GO:0002230	positive regulation of defense response to virus by host	4/261	29/18866	0.000647509	0.00604308	0.00405665	DDX58/IL23A/ZC3H12A/APOBEC3G	4
GO:0019730	antimicrobial humoral response	8/261	137/18866	0.000648765	0.00604308	0.00405665	CXCL2/CXCL6/CXCL3/CXCL5/CXCL1/CXCL10/CXCL11/CXCL8	8
GO:0043542	endothelial cell migration	12/261	286/18866	0.00066679	0.00619391	0.00415791	HDAC9/CEACAM1/ANGPT2/ID1/KDR/ETS1/THBS1/PLPP3/ZC3H12A/GREM1/ATOH8/TNF	12
GO:0006596	polyamine biosynthetic process	3/261	13/18866	0.000675555	0.00619391	0.00415791	SMOX/ODC1/SAT1	3
GO:0010623	programmed cell death involved in cell development	3/261	13/18866	0.000675555	0.00619391	0.00415791	KITLG/IL1A/IL1B	3
GO:0016322	neuron remodeling	3/261	13/18866	0.000675555	0.00619391	0.00415791	CX3CL1/NTN4/C3	3
GO:0030656	regulation of vitamin metabolic process	3/261	13/18866	0.000675555	0.00619391	0.00415791	NFKB1/IL1B/TNF	3
GO:0031650	regulation of heat generation	3/261	13/18866	0.000675555	0.00619391	0.00415791	IL1B/APLN/TNF	3
GO:0032725	positive regulation of granulocyte macrophage colony-stimulating factor production	3/261	13/18866	0.000675555	0.00619391	0.00415791	DDX58/IL23A/IL1B	3
GO:0061043	regulation of vascular wound healing	3/261	13/18866	0.000675555	0.00619391	0.00415791	SLC12A2/TNFAIP3/TNF	3
GO:0035272	exocrine system development	5/261	51/18866	0.000681479	0.006236	0.00418616	NTN4/SEMA3A/SEMA3C/NKX3-1/TNF	5
GO:0036293	response to decreased oxygen levels	14/261	371/18866	0.000696415	0.00636023	0.00426955	ICAM1/ANGPT2/PLAT/NAMPT/STC2/PLAU/ETS1/TLR2/THBS1/ADAM8/NR4A2/ITGA2/NKX3-1/LTA	14
GO:0033209	tumor necrosis factor-mediated signaling pathway	9/261	173/18866	0.000698511	0.00636694	0.00427405	BIRC3/TRAF1/CYLD/NFKBIA/TNFSF13B/TNFAIP3/LTA/LTB/TNF	9
GO:0001659	temperature homeostasis	9/261	174/18866	0.000727895	0.006609	0.00443655	NPR3/IL1A/G0S2/IL1B/ID1/PDGFC/APLN/DIO2/TNF	9
GO:0097696	receptor signaling pathway via STAT	9/261	174/18866	0.000727895	0.006609	0.00443655	JAK3/CCL2/IL23A/IL6/IL24/IL7R/TNF/LYN/CCL5	9
GO:0043372	positive regulation of CD4-positive, alpha-beta T cell differentiation	4/261	30/18866	0.000739069	0.0066845	0.00448723	RIPK2/IL23A/NFKBIZ/LGALS9	4
GO:0071711	basement membrane organization	4/261	30/18866	0.000739069	0.0066845	0.00448723	NTN4/PHLDB2/CTSS/LAMB3	4
GO:0002704	negative regulation of leukocyte mediated immunity	5/261	52/18866	0.000745567	0.00670436	0.00450057	CEACAM1/JAK3/IL7R/LGALS9/HLA-F	5
GO:0038066	p38MAPK cascade	5/261	52/18866	0.000745567	0.00670436	0.00450057	CYLD/IL1B/ZC3H12A/LGALS9/PER1	5
GO:0050999	regulation of nitric-oxide synthase activity	5/261	52/18866	0.000745567	0.00670436	0.00450057	NPR3/IL1A/IL1B/GCH1/TNF	5
GO:0097193	intrinsic apoptotic signaling pathway	12/261	290/18866	0.000752929	0.00674576	0.00452836	E2F2/PLAUR/CD44/CYLD/BMF/SOD2/BCL2L11/MSX1/NKX3-1/ERN1/TNF/IKBKE	12
GO:0090130	tissue migration	14/261	374/18866	0.000753056	0.00674576	0.00452836	HDAC9/SEMA3A/CEACAM1/ANGPT2/ID1/KDR/ETS1/THBS1/PLPP3/ZC3H12A/ITGA2/GREM1/ATOH8/TNF	14
GO:0051701	interaction with host	10/261	212/18866	0.000765798	0.00684679	0.00459617	ICAM1/LDLR/TRIM22/TNIP1/BCL2L11/CLDN1/PTX3/ITGA2/LGALS9/CXCL8	10
GO:0002833	positive regulation of response to biotic stimulus	11/261	251/18866	0.000778156	0.00694401	0.00466143	RIPK2/RELB/DHX58/NFKB1/ADAM8/GBP5/CLEC4E/HLA-F/LYN/IKBKE/CCL5	11
GO:0007254	JNK cascade	10/261	213/18866	0.000793948	0.00707143	0.00474697	TRAF1/SEMA3A/CYLD/RIPK2/IL1B/IRAK2/TRIB1/ERN1/PER1/TNF	10
GO:0032731	positive regulation of interleukin-1 beta production	5/261	53/18866	0.00081405	0.00722296	0.00484869	P2RX7/RIPK2/IL6/LGALS9/TNF	5
GO:0045599	negative regulation of fat cell differentiation	5/261	53/18866	0.00081405	0.00722296	0.00484869	JAG1/IL6/JDP2/INSIG1/TNF	5
GO:0051924	regulation of calcium ion transport	11/261	253/18866	0.000830399	0.00735407	0.0049367	CX3CL1/P2RX7/ICAM1/CCL2/STC2/DYSF/RRAD/CXCL10/CXCL11/LYN/CCL5	11
GO:0032770	positive regulation of monooxygenase activity	4/261	31/18866	0.000839415	0.00736417	0.00494349	NPR3/IL1B/GCH1/TNF	4
GO:0039528	cytoplasmic pattern recognition receptor signaling pathway in response to virus	4/261	31/18866	0.000839415	0.00736417	0.00494349	BIRC3/DDX58/DHX58/IFIH1	4
GO:0072538	T-helper 17 type immune response	4/261	31/18866	0.000839415	0.00736417	0.00494349	IL23A/IL6/NFKBIZ/ZC3H12A	4
GO:1902624	positive regulation of neutrophil migration	4/261	31/18866	0.000839415	0.00736417	0.00494349	IL23A/DYSF/ADAM8/CXCL8	4
GO:2000406	positive regulation of T cell migration	4/261	31/18866	0.000839415	0.00736417	0.00494349	CCL20/ADAM8/CXCL10/CCL5	4
GO:1901224	positive regulation of NIK/NF-kappaB signaling	6/261	80/18866	0.000845506	0.00739673	0.00496534	IL23A/IL1B/TLR2/GREM1/LGALS9/TNF	6
GO:0051709	regulation of killing of cells of other organism	3/261	14/18866	0.000851035	0.00739673	0.00496534	P2RX7/CXCL6/BCL2L11	3
GO:0070234	positive regulation of T cell apoptotic process	3/261	14/18866	0.000851035	0.00739673	0.00496534	ADAM8/LGALS9/CCL5	3
GO:0070486	leukocyte aggregation	3/261	14/18866	0.000851035	0.00739673	0.00496534	CD44/IL1B/CD47	3
GO:1903799	negative regulation of production of miRNAs involved in gene silencing by miRNA	3/261	14/18866	0.000851035	0.00739673	0.00496534	IL6/ZC3H12A/TNF	3
GO:0045598	regulation of fat cell differentiation	8/261	143/18866	0.000859283	0.00745456	0.00500416	JAG1/ZBTB16/IL6/JDP2/ZC3H12A/INSIG1/TNF/CCDC71L	8
GO:0061008	hepaticobiliary system development	8/261	144/18866	0.000899165	0.00778611	0.00522673	LIMS2/CEACAM1/HMGCS1/TNFAIP3/IL6/CLDN1/ITGA2/SOX17	8
GO:0006909	phagocytosis	14/261	382/18866	0.00092349	0.00798196	0.0053582	P2RX7/CCL2/IL1B/C3/CD93/LDLR/DYSF/TLR2/THBS1/PTX3/ITGA2/CD47/TNF/LYN	14
GO:0048841	regulation of axon extension involved in axon guidance	4/261	32/18866	0.000948996	0.0081722	0.00548591	SEMA3A/SEMA3C/SEMA6C/SEMA3D	4
GO:0050869	negative regulation of B cell activation	4/261	32/18866	0.000948996	0.0081722	0.00548591	TNFAIP3/INHBA/TNFRSF21/LYN	4
GO:0001706	endoderm formation	5/261	55/18866	0.000964953	0.00827912	0.00555768	DUSP4/INHBA/HMGA2/SOX17/LAMB3	5
GO:0002720	positive regulation of cytokine production involved in immune response	5/261	55/18866	0.000964953	0.00827912	0.00555768	DDX58/IL1B/IL6/GPRC5B/HLA-F	5
GO:0010951	negative regulation of endopeptidase activity	11/261	258/18866	0.00097386	0.00834023	0.00559871	PLAUR/BIRC3/CD44/LAMP3/TFPI2/C3/SERPINE2/THBS1/TNFAIP8/TIMP4/TNF	11
GO:0044344	cellular response to fibroblast growth factor stimulus	8/261	146/18866	0.000983383	0.0084064	0.00564312	CD44/CCL2/THBS1/FGF5/HHIP/CXCL8/APLN/CCL5	8
GO:0048708	astrocyte differentiation	6/261	83/18866	0.00102611	0.00873815	0.00586582	IL1B/LDLR/SERPINE2/IL6/ROR1/TNF	6
GO:0044409	entry into host	8/261	147/18866	0.0010278	0.00873815	0.00586582	ICAM1/LDLR/TRIM22/CLDN1/PTX3/ITGA2/LGALS9/CXCL8	8
GO:0051384	response to glucocorticoid	8/261	147/18866	0.0010278	0.00873815	0.00586582	ICAM1/IL6/IL1RN/BCL2L11/CLDN1/ABCA3/FOSL1/TNF	8
GO:0010632	regulation of epithelial cell migration	12/261	301/18866	0.00103911	0.00876093	0.00588112	HDAC9/SEMA3A/CEACAM1/ANGPT2/KDR/ETS1/THBS1/PLPP3/ZC3H12A/ITGA2/ATOH8/TNF	12
GO:0043433	negative regulation of DNA-binding transcription factor activity	9/261	183/18866	0.00104051	0.00876093	0.00588112	CYLD/NFKBIA/TNFAIP3/ID1/IRAK2/BHLHE40/NFKBIE/ZC3H12A/TRIB1	9
GO:0001755	neural crest cell migration	5/261	56/18866	0.00104775	0.00876093	0.00588112	KITLG/SEMA3A/SEMA3C/SEMA6C/SEMA3D	5
GO:1904645	response to amyloid-beta	5/261	56/18866	0.00104775	0.00876093	0.00588112	ICAM1/NAMPT/CACNA1A/BCL2L11/VCAM1	5
GO:0002467	germinal center formation	3/261	15/18866	0.00105296	0.00876093	0.00588112	NFKB2/TNFSF13B/TNFAIP3	3
GO:0032645	regulation of granulocyte macrophage colony-stimulating factor production	3/261	15/18866	0.00105296	0.00876093	0.00588112	DDX58/IL23A/IL1B	3
GO:0034111	negative regulation of homotypic cell-cell adhesion	3/261	15/18866	0.00105296	0.00876093	0.00588112	CEACAM1/SERPINE2/C1QTNF1	3
GO:0042362	fat-soluble vitamin biosynthetic process	3/261	15/18866	0.00105296	0.00876093	0.00588112	NFKB1/IL1B/TNF	3
GO:0045779	negative regulation of bone resorption	3/261	15/18866	0.00105296	0.00876093	0.00588112	P2RX7/TNFAIP3/IL6	3
GO:0051044	positive regulation of membrane protein ectodomain proteolysis	3/261	15/18866	0.00105296	0.00876093	0.00588112	IL1B/ADAM8/TNF	3
GO:0070831	basement membrane assembly	3/261	15/18866	0.00105296	0.00876093	0.00588112	NTN4/PHLDB2/LAMB3	3
GO:2000345	regulation of hepatocyte proliferation	3/261	15/18866	0.00105296	0.00876093	0.00588112	LIMS2/CEACAM1/TNFAIP3	3
GO:0046640	regulation of alpha-beta T cell proliferation	4/261	33/18866	0.00106826	0.00887247	0.00595599	RIPK2/IL23A/IRF1/LGALS9	4
GO:0071902	positive regulation of protein serine/threonine kinase activity	13/261	345/18866	0.00108752	0.00901637	0.00605259	KITLG/P2RX7/RIPK2/IL1B/GDF15/IRAK2/THBS1/PDGFC/HMGA2/ADAM8/SAA1/ERN1/TNF	13
GO:0002439	chronic inflammatory response to antigenic stimulus	2/261	4/18866	0.00112317	0.0091657	0.00615284	LTA/TNF	2
GO:0002528	regulation of vascular permeability involved in acute inflammatory response	2/261	4/18866	0.00112317	0.0091657	0.00615284	C2CD4A/C2CD4B	2
GO:0002678	positive regulation of chronic inflammatory response	2/261	4/18866	0.00112317	0.0091657	0.00615284	LTA/TNF	2
GO:0006598	polyamine catabolic process	2/261	4/18866	0.00112317	0.0091657	0.00615284	SMOX/SAT1	2
GO:0033092	positive regulation of immature T cell proliferation in thymus	2/261	4/18866	0.00112317	0.0091657	0.00615284	IL1A/IL1B	2
GO:0070666	regulation of mast cell proliferation	2/261	4/18866	0.00112317	0.0091657	0.00615284	KITLG/LYN	2
GO:1901842	negative regulation of high voltage-gated calcium channel activity	2/261	4/18866	0.00112317	0.0091657	0.00615284	DYSF/RRAD	2
GO:2000346	negative regulation of hepatocyte proliferation	2/261	4/18866	0.00112317	0.0091657	0.00615284	LIMS2/CEACAM1	2
GO:2000670	positive regulation of dendritic cell apoptotic process	2/261	4/18866	0.00112317	0.0091657	0.00615284	LGALS9/LYN	2
GO:0016485	protein processing	10/261	223/18866	0.00112528	0.0091669	0.00615364	BIRC3/P2RX7/RIPK2/PLAT/PLAU/SERPINE2/THBS1/ADAM8/C1R/CTSS	10
GO:0071398	cellular response to fatty acid	5/261	57/18866	0.00113571	0.00923578	0.00619988	LDLR/PID1/CLDN1/ZC3H12A/IRS1	5
GO:0048863	stem cell differentiation	11/261	264/18866	0.00117248	0.00951825	0.00638949	KITLG/SEMA3A/SEMA3C/JAG1/SEMA6C/HMGA2/SEMA3D/MSX1/KBTBD8/SOX17/GREM1	11
GO:0002440	production of molecular mediator of immune response	12/261	306/18866	0.00119632	0.00969496	0.00650812	POU2F2/TNFSF13B/JAK3/DDX58/IL1B/IL6/TLR2/GPRC5B/IL7R/LACC1/HLA-F/TNF	12
GO:0043409	negative regulation of MAPK cascade	9/261	187/18866	0.00121059	0.00977674	0.00656302	CYLD/P2RX7/GBP1/DUSP4/IL1B/TNIP1/CNKSR3/PER1/LYN	9
GO:0061138	morphogenesis of a branching epithelium	9/261	187/18866	0.00121059	0.00977674	0.00656302	NTN4/SEMA3A/SEMA3C/KDR/HHIP/GREM1/NKX3-1/CSF1/TNF	9
GO:1904892	regulation of receptor signaling pathway via STAT	8/261	151/18866	0.00122177	0.00985	0.0066122	JAK3/IL23A/IL6/IL24/IL7R/TNF/LYN/CCL5	8
GO:0002886	regulation of myeloid leukocyte mediated immunity	5/261	58/18866	0.00122902	0.00989135	0.00663996	DDX58/CXCL6/C3/LGALS9/LYN	5
GO:0042509	regulation of tyrosine phosphorylation of STAT protein	6/261	86/18866	0.00123497	0.00990516	0.00664922	IL23A/IL6/IL24/TNF/LYN/CCL5	6
GO:0070664	negative regulation of leukocyte proliferation	6/261	86/18866	0.00123497	0.00990516	0.00664922	TNFAIP3/TNFRSF21/GREM1/LGALS9/LST1/LYN	6
GO:0002523	leukocyte migration involved in inflammatory response	3/261	16/18866	0.00128276	0.010201	0.00684783	CX3CL1/SELE/ADAM8	3
GO:0006595	polyamine metabolic process	3/261	16/18866	0.00128276	0.010201	0.00684783	SMOX/ODC1/SAT1	3
GO:0032604	granulocyte macrophage colony-stimulating factor production	3/261	16/18866	0.00128276	0.010201	0.00684783	DDX58/IL23A/IL1B	3
GO:0034116	positive regulation of heterotypic cell-cell adhesion	3/261	16/18866	0.00128276	0.010201	0.00684783	CD44/IL1B/TNF	3
GO:0045953	negative regulation of natural killer cell mediated cytotoxicity	3/261	16/18866	0.00128276	0.010201	0.00684783	CEACAM1/LGALS9/HLA-F	3
GO:0070482	response to oxygen levels	14/261	396/18866	0.00130005	0.0103209	0.00692832	ICAM1/ANGPT2/PLAT/NAMPT/STC2/PLAU/ETS1/TLR2/THBS1/ADAM8/NR4A2/ITGA2/NKX3-1/LTA	14
GO:0071774	response to fibroblast growth factor	8/261	153/18866	0.00132913	0.010533	0.00707065	CD44/CCL2/THBS1/FGF5/HHIP/CXCL8/APLN/CCL5	8
GO:0042176	regulation of protein catabolic process	14/261	397/18866	0.00133126	0.010533	0.00707065	LAMP3/ODC1/TNFAIP3/IL1B/LDLR/DYSF/SERPINE2/HECW2/ADAM8/DAB2/TIMP4/SOX17/TRIB1/TNF	14
GO:0110111	negative regulation of animal organ morphogenesis	4/261	35/18866	0.00133766	0.0105657	0.00709262	LIMS2/CEACAM1/GREM1/TNF	4
GO:0034765	regulation of ion transmembrane transport	16/261	489/18866	0.00134768	0.0106269	0.00713373	CX3CL1/P2RX7/CCL2/KCNJ2/KCNK15/DYSF/THBS1/HECW2/CACNA1A/CNKSR3/CTSS/RRAD/CXCL10/CXCL11/TCAF2/LYN	16
GO:0030308	negative regulation of cell growth	9/261	190/18866	0.00135234	0.0106446	0.0071456	SEMA3A/SEMA3C/INHBA/SERPINE2/SEMA6C/SEMA3D/MSX1/SOX17/GREM1	9
GO:0048608	reproductive structure development	15/261	443/18866	0.00135448	0.0106446	0.0071456	KITLG/SEMA3A/ICAM1/HMGCS1/STC2/TNFSF10/INHBA/FST/SERPINE2/LHX9/BCL2L11/PTX3/NKX3-1/JUNB/FOSL1	15
GO:0001836	release of cytochrome c from mitochondria	5/261	60/18866	0.00143247	0.0112386	0.00754437	PLAUR/BMF/SOD2/TNFSF10/BCL2L11	5
GO:0061458	reproductive system development	15/261	447/18866	0.00147933	0.0115059	0.00772378	KITLG/SEMA3A/ICAM1/HMGCS1/STC2/TNFSF10/INHBA/FST/SERPINE2/LHX9/BCL2L11/PTX3/NKX3-1/JUNB/FOSL1	15
GO:0010466	negative regulation of peptidase activity	11/261	272/18866	0.00148812	0.0115059	0.00772378	PLAUR/BIRC3/CD44/LAMP3/TFPI2/C3/SERPINE2/THBS1/TNFAIP8/TIMP4/TNF	11
GO:0046879	hormone secretion	12/261	314/18866	0.00148863	0.0115059	0.00772378	INHBA/IL1B/IL6/IL1RN/CACNA1A/NKX3-1/IRS1/APLN/C1QTNF1/TNF/LYN/CCL5	12
GO:0002755	MyD88-dependent toll-like receptor signaling pathway	4/261	36/18866	0.00148868	0.0115059	0.00772378	IRF1/IRAK2/TLR2/TNIP1	4
GO:0010543	regulation of platelet activation	4/261	36/18866	0.00148868	0.0115059	0.00772378	CEACAM1/SERPINE2/C1QTNF1/LYN	4
GO:0046633	alpha-beta T cell proliferation	4/261	36/18866	0.00148868	0.0115059	0.00772378	RIPK2/IL23A/IRF1/LGALS9	4
GO:1901099	negative regulation of signal transduction in absence of ligand	4/261	36/18866	0.00148868	0.0115059	0.00772378	CX3CL1/IL1A/IL1B/TNF	4
GO:2000516	positive regulation of CD4-positive, alpha-beta T cell activation	4/261	36/18866	0.00148868	0.0115059	0.00772378	RIPK2/IL23A/NFKBIZ/LGALS9	4
GO:2001240	negative regulation of extrinsic apoptotic signaling pathway in absence of ligand	4/261	36/18866	0.00148868	0.0115059	0.00772378	CX3CL1/IL1A/IL1B/TNF	4
GO:0002793	positive regulation of peptide secretion	9/261	193/18866	0.00150718	0.0116296	0.00780685	P2RX7/IL1A/IL6/TLR2/ADAM8/CLEC4E/APLN/SAA1/TNF	9
GO:0002716	negative regulation of natural killer cell mediated immunity	3/261	17/18866	0.0015418	0.0118382	0.00794684	CEACAM1/LGALS9/HLA-F	3
GO:0048535	lymph node development	3/261	17/18866	0.0015418	0.0118382	0.00794684	IL7R/LTA/LTB	3
GO:0070242	thymocyte apoptotic process	3/261	17/18866	0.0015418	0.0118382	0.00794684	JAK3/ADAM8/BCL2L11	3
GO:0001666	response to hypoxia	13/261	359/18866	0.00155288	0.0118882	0.00798039	ICAM1/ANGPT2/PLAT/STC2/PLAU/ETS1/TLR2/THBS1/ADAM8/NR4A2/ITGA2/NKX3-1/LTA	13
GO:0021782	glial cell development	7/261	122/18866	0.00155339	0.0118882	0.00798039	IL1B/LDLR/IL6/TLR2/ROR1/TNF/LYN	7
GO:0046427	positive regulation of receptor signaling pathway via JAK-STAT	6/261	90/18866	0.00156226	0.011917	0.00799977	IL23A/IL6/IL24/TNF/LYN/CCL5	6
GO:0070542	response to fatty acid	6/261	90/18866	0.00156226	0.011917	0.00799977	LDLR/TLR2/PID1/CLDN1/ZC3H12A/IRS1	6
GO:0070997	neuron death	13/261	360/18866	0.00159163	0.0121213	0.00813688	CX3CL1/NAMPT/CSF3/CCL2/SOD2/TNFRSF21/ADAM8/BCL2L11/NR4A2/CSF1/HLA-F/TNF/CCL5	13
GO:0048846	axon extension involved in axon guidance	4/261	37/18866	0.00165118	0.0125174	0.0084028	SEMA3A/SEMA3C/SEMA6C/SEMA3D	4
GO:1902284	neuron projection extension involved in neuron projection guidance	4/261	37/18866	0.00165118	0.0125174	0.0084028	SEMA3A/SEMA3C/SEMA6C/SEMA3D	4
GO:0046849	bone remodeling	6/261	91/18866	0.00165352	0.0125174	0.0084028	P2RX7/CA2/TNFAIP3/IL6/ADAM8/GREM1	6
GO:0010803	regulation of tumor necrosis factor-mediated signaling pathway	5/261	62/18866	0.00165971	0.0125174	0.0084028	BIRC3/TRAF1/CYLD/TNFAIP3/TNF	5
GO:0045824	negative regulation of innate immune response	5/261	62/18866	0.00165971	0.0125174	0.0084028	CEACAM1/DHX58/TNFAIP3/LGALS9/HLA-F	5
GO:0060393	regulation of pathway-restricted SMAD protein phosphorylation	5/261	62/18866	0.00165971	0.0125174	0.0084028	INHBA/GDF15/SMAD6/DAB2/GREM1	5
GO:0007565	female pregnancy	9/261	196/18866	0.00167596	0.0126196	0.0084714	ANGPT2/NAMPT/STC2/IL1B/ETS1/ITGA2/LGALS9/JUNB/FOSL1	9
GO:0046635	positive regulation of alpha-beta T cell activation	5/261	63/18866	0.00178275	0.0134021	0.00899671	RIPK2/ZBTB16/IL23A/NFKBIZ/LGALS9	5
GO:0062012	regulation of small molecule metabolic process	15/261	456/18866	0.00179592	0.0134795	0.00904865	CEACAM1/P2RX7/SQLE/NFKB1/HMGCS1/ODC1/IL1B/LDLR/PID1/SLC2A6/IRS1/C1QTNF1/LACC1/INSIG1/TNF	15
GO:0032733	positive regulation of interleukin-10 production	4/261	38/18866	0.00182561	0.0134888	0.00905489	IL23A/IL6/TLR2/LGALS9	4
GO:2000403	positive regulation of lymphocyte migration	4/261	38/18866	0.00182561	0.0134888	0.00905489	CCL20/ADAM8/CXCL10/CCL5	4
GO:0010594	regulation of endothelial cell migration	10/261	238/18866	0.00182698	0.0134888	0.00905489	HDAC9/CEACAM1/ANGPT2/KDR/ETS1/THBS1/PLPP3/ZC3H12A/ATOH8/TNF	10
GO:0043031	negative regulation of macrophage activation	3/261	18/18866	0.00183135	0.0134888	0.00905489	CX3CL1/LDLR/ZC3H12A	3
GO:0150078	positive regulation of neuroinflammatory response	3/261	18/18866	0.00183135	0.0134888	0.00905489	IL1B/IL6/TNF	3
GO:0034767	positive regulation of ion transmembrane transport	8/261	161/18866	0.00183591	0.0134888	0.00905489	CX3CL1/P2RX7/CCL2/KCNJ2/CNKSR3/CTSS/CXCL10/CXCL11	8
GO:0014909	smooth muscle cell migration	6/261	93/18866	0.00184813	0.0134888	0.00905489	PLAT/PLAU/DOCK4/ITGA2/TRIB1/CCL5	6
GO:0032677	regulation of interleukin-8 production	6/261	93/18866	0.00184813	0.0134888	0.00905489	DDX58/IL1B/IL6/TLR2/LGALS9/TNF	6
GO:0002925	positive regulation of humoral immune response mediated by circulating immunoglobulin	2/261	5/18866	0.00185486	0.0134888	0.00905489	LTA/TNF	2
GO:0022614	membrane to membrane docking	2/261	5/18866	0.00185486	0.0134888	0.00905489	ICAM1/VCAM1	2
GO:0034136	negative regulation of toll-like receptor 2 signaling pathway	2/261	5/18866	0.00185486	0.0134888	0.00905489	TNFAIP3/LYN	2
GO:0034343	type III interferon production	2/261	5/18866	0.00185486	0.0134888	0.00905489	DDX58/IFIH1	2
GO:0034344	regulation of type III interferon production	2/261	5/18866	0.00185486	0.0134888	0.00905489	DDX58/IFIH1	2
GO:0046136	positive regulation of vitamin metabolic process	2/261	5/18866	0.00185486	0.0134888	0.00905489	IL1B/TNF	2
GO:0060664	epithelial cell proliferation involved in salivary gland morphogenesis	2/261	5/18866	0.00185486	0.0134888	0.00905489	NKX3-1/TNF	2
GO:0060666	dichotomous subdivision of terminal units involved in salivary gland branching	2/261	5/18866	0.00185486	0.0134888	0.00905489	SEMA3A/SEMA3C	2
GO:0070662	mast cell proliferation	2/261	5/18866	0.00185486	0.0134888	0.00905489	KITLG/LYN	2
GO:0090289	regulation of osteoclast proliferation	2/261	5/18866	0.00185486	0.0134888	0.00905489	TNFAIP3/GREM1	2
GO:1903969	regulation of response to macrophage colony-stimulating factor	2/261	5/18866	0.00185486	0.0134888	0.00905489	TLR2/CSF1	2
GO:1903972	regulation of cellular response to macrophage colony-stimulating factor stimulus	2/261	5/18866	0.00185486	0.0134888	0.00905489	TLR2/CSF1	2
GO:0001935	endothelial cell proliferation	9/261	199/18866	0.00185957	0.0135021	0.00906381	CCL2/KDR/DYSF/THBS1/ATOH8/LRG1/APLN/ERN1/TNF	9
GO:0007548	sex differentiation	11/261	280/18866	0.0018703	0.013559	0.00910199	KITLG/SEMA3A/ICAM1/HMGCS1/TNFSF10/INHBA/FST/LHX9/BCL2L11/PTX3/NKX3-1	11
GO:0009914	hormone transport	12/261	323/18866	0.00188556	0.0136484	0.00916202	INHBA/IL1B/IL6/IL1RN/CACNA1A/NKX3-1/IRS1/APLN/C1QTNF1/TNF/LYN/CCL5	12
GO:0001885	endothelial cell development	5/261	64/18866	0.00191234	0.0137571	0.009235	ICAM1/IL1B/ID1/CLDN1/TNF	5
GO:0002437	inflammatory response to antigenic stimulus	5/261	64/18866	0.00191234	0.0137571	0.009235	ICAM1/C3/IL1RN/LTA/TNF	5
GO:0045453	bone resorption	5/261	64/18866	0.00191234	0.0137571	0.009235	P2RX7/CA2/TNFAIP3/IL6/ADAM8	5
GO:2000401	regulation of lymphocyte migration	5/261	64/18866	0.00191234	0.0137571	0.009235	CCL2/CCL20/ADAM8/CXCL10/CCL5	5
GO:0070302	regulation of stress-activated protein kinase signaling cascade	10/261	240/18866	0.00194267	0.0139538	0.00936703	TRAF1/SEMA3A/CYLD/RIPK2/IL1B/ZC3H12A/ERN1/PER1/TNF/LYN	10
GO:0001704	formation of primary germ layer	7/261	127/18866	0.00195528	0.0140229	0.00941339	DUSP4/INHBA/HMGA2/ITGA2/SOX17/ATOH8/LAMB3	7
GO:0001763	morphogenesis of a branching structure	9/261	201/18866	0.00199067	0.0142548	0.00956909	NTN4/SEMA3A/SEMA3C/KDR/HHIP/GREM1/NKX3-1/CSF1/TNF	9
GO:0045862	positive regulation of proteolysis	13/261	370/18866	0.00202519	0.0144798	0.00972015	RIPK2/TNFSF10/IL1B/TNIP1/ADAM8/DAB2/BCL2L11/ZC3H12A/NKX3-1/LGALS9/TRIB1/TNF/LYN	13
GO:0010573	vascular endothelial growth factor production	5/261	65/18866	0.0020487	0.014581	0.00978806	IL1A/IL1B/C3/IL6/TNF	5
GO:0060389	pathway-restricted SMAD protein phosphorylation	5/261	65/18866	0.0020487	0.014581	0.00978806	INHBA/GDF15/SMAD6/DAB2/GREM1	5
GO:1905953	negative regulation of lipid localization	5/261	65/18866	0.0020487	0.014581	0.00978806	NFKBIA/NFKB1/IL6/THBS1/TNF	5
GO:0045638	negative regulation of myeloid cell differentiation	6/261	95/18866	0.00205962	0.0146029	0.00980274	CEACAM1/NFKBIA/ZBTB16/INHBA/TRIB1/LYN	6
GO:0007259	receptor signaling pathway via JAK-STAT	8/261	164/18866	0.00206114	0.0146029	0.00980274	JAK3/CCL2/IL23A/IL6/IL24/TNF/LYN/CCL5	8
GO:0031960	response to corticosteroid	8/261	164/18866	0.00206114	0.0146029	0.00980274	ICAM1/IL6/IL1RN/BCL2L11/CLDN1/ABCA3/FOSL1/TNF	8
GO:0043270	positive regulation of ion transport	11/261	284/18866	0.00208943	0.0147809	0.00992227	CX3CL1/SLC12A2/P2RX7/CCL2/KCNJ2/IL1B/CNKSR3/CTSS/CXCL10/CXCL11/CCL5	11
GO:0042113	B cell activation	12/261	328/18866	0.00214121	0.015046	0.0101002	POU2F2/HDAC9/CYLD/TNFSF13B/JAK3/TNFAIP3/INHBA/IL6/TNFRSF21/VCAM1/IL7R/LYN	12
GO:0002710	negative regulation of T cell mediated immunity	3/261	19/18866	0.00215265	0.015046	0.0101002	CEACAM1/IL7R/HLA-F	3
GO:0010544	negative regulation of platelet activation	3/261	19/18866	0.00215265	0.015046	0.0101002	CEACAM1/SERPINE2/C1QTNF1	3
GO:0010759	positive regulation of macrophage chemotaxis	3/261	19/18866	0.00215265	0.015046	0.0101002	THBS1/CSF1/CCL5	3
GO:0045063	T-helper 1 cell differentiation	3/261	19/18866	0.00215265	0.015046	0.0101002	RIPK2/RELB/JAK3	3
GO:0045091	regulation of single stranded viral RNA replication via double stranded DNA intermediate	3/261	19/18866	0.00215265	0.015046	0.0101002	HMGA2/CXCL8/APOBEC3G	3
GO:0048245	eosinophil chemotaxis	3/261	19/18866	0.00215265	0.015046	0.0101002	CX3CL1/CCL2/CCL5	3
GO:2000319	regulation of T-helper 17 cell differentiation	3/261	19/18866	0.00215265	0.015046	0.0101002	IL23A/NFKBIZ/ZC3H12A	3
GO:0032922	circadian regulation of gene expression	5/261	66/18866	0.00219201	0.0152983	0.0102696	RELB/NAMPT/ID1/BHLHE40/PER1	5
GO:0034142	toll-like receptor 4 signaling pathway	4/261	40/18866	0.00221201	0.0153919	0.0103324	NFKBIA/RIPK2/TNFAIP3/LYN	4
GO:0071526	semaphorin-plexin signaling pathway	4/261	40/18866	0.00221201	0.0153919	0.0103324	SEMA3A/SEMA3C/SEMA6C/SEMA3D	4
GO:1903531	negative regulation of secretion by cell	8/261	166/18866	0.00222299	0.0154224	0.0103529	HDAC9/CEACAM1/INHBA/IL1B/RHBDF2/LGALS9/IRS1/HLA-F	8
GO:2001242	regulation of intrinsic apoptotic signaling pathway	8/261	166/18866	0.00222299	0.0154224	0.0103529	PLAUR/CD44/CYLD/BMF/SOD2/BCL2L11/MSX1/NKX3-1	8
GO:0071375	cellular response to peptide hormone stimulus	12/261	330/18866	0.00225111	0.0155943	0.0104683	HDAC9/CEACAM1/CA2/JAK3/NFKB1/IL1B/GDF15/NR4A2/PID1/IRS1/INSIG1/LYN	12
GO:0019218	regulation of steroid metabolic process	7/261	131/18866	0.00233124	0.0161256	0.0108249	SQLE/NFKB1/HMGCS1/IL1B/LDLR/INSIG1/TNF	7
GO:1900015	regulation of cytokine production involved in inflammatory response	5/261	67/18866	0.0023425	0.0161795	0.0108611	IL6/GBP5/ZC3H12A/PER1/TNF	5
GO:0002832	negative regulation of response to biotic stimulus	6/261	98/18866	0.0024105	0.0165757	0.0111271	CEACAM1/DHX58/TNFAIP3/LGALS9/TRIB1/HLA-F	6
GO:0010771	negative regulation of cell morphogenesis involved in differentiation	6/261	98/18866	0.0024105	0.0165757	0.0111271	SEMA3A/SEMA3C/GBP1/ID1/SEMA6C/SEMA3D	6
GO:0050810	regulation of steroid biosynthetic process	6/261	98/18866	0.0024105	0.0165757	0.0111271	SQLE/NFKB1/HMGCS1/IL1B/INSIG1/TNF	6
GO:0046890	regulation of lipid biosynthetic process	9/261	207/18866	0.0024288	0.0166771	0.0111951	CEACAM1/SQLE/NFKB1/HMGCS1/IL1B/C3/LDLR/INSIG1/TNF	9
GO:0010595	positive regulation of endothelial cell migration	7/261	132/18866	0.0024334	0.0166841	0.0111999	HDAC9/KDR/ETS1/THBS1/PLPP3/ZC3H12A/ATOH8	7
GO:0052126	movement in host environment	8/261	169/18866	0.00248432	0.0170083	0.0114175	ICAM1/LDLR/TRIM22/CLDN1/PTX3/ITGA2/LGALS9/CXCL8	8
GO:0002827	positive regulation of T-helper 1 type immune response	3/261	20/18866	0.00250682	0.0170129	0.0114206	RIPK2/IL23A/IL1B	3
GO:0023019	signal transduction involved in regulation of gene expression	3/261	20/18866	0.00250682	0.0170129	0.0114206	FGF5/MSX1/SOX17	3
GO:0032727	positive regulation of interferon-alpha production	3/261	20/18866	0.00250682	0.0170129	0.0114206	RIPK2/DDX58/IFIH1	3
GO:0039692	single stranded viral RNA replication via double stranded DNA intermediate	3/261	20/18866	0.00250682	0.0170129	0.0114206	HMGA2/CXCL8/APOBEC3G	3
GO:0060965	negative regulation of gene silencing by miRNA	3/261	20/18866	0.00250682	0.0170129	0.0114206	IL6/ZC3H12A/TNF	3
GO:0071636	positive regulation of transforming growth factor beta production	3/261	20/18866	0.00250682	0.0170129	0.0114206	CX3CL1/THBS1/LGALS9	3
GO:0010717	regulation of epithelial to mesenchymal transition	6/261	99/18866	0.0025369	0.0171424	0.0115075	JAG1/IL1B/IL6/PHLDB2/DAB2/GREM1	6
GO:0051817	modulation of process of other organism involved in symbiotic interaction	6/261	99/18866	0.0025369	0.0171424	0.0115075	TNIP1/HMGA2/BCL2L11/PTX3/ZC3H12A/CCL5	6
GO:0062207	regulation of pattern recognition receptor signaling pathway	6/261	99/18866	0.0025369	0.0171424	0.0115075	BIRC3/DHX58/TNFAIP3/IRF1/TLR2/LYN	6
GO:0072001	renal system development	11/261	292/18866	0.0025904	0.0174786	0.0117332	ANGPT2/JAG1/CA2/ZBTB16/ODC1/SMAD6/BCL2L11/NFIA/SOX17/GREM1/NKX3-1	11
GO:0046718	viral entry into host cell	7/261	134/18866	0.00264802	0.0178128	0.0119576	ICAM1/LDLR/TRIM22/CLDN1/PTX3/ITGA2/LGALS9	7
GO:0002707	negative regulation of lymphocyte mediated immunity	4/261	42/18866	0.00265135	0.0178128	0.0119576	CEACAM1/IL7R/LGALS9/HLA-F	4
GO:1902622	regulation of neutrophil migration	4/261	42/18866	0.00265135	0.0178128	0.0119576	IL23A/DYSF/ADAM8/CXCL8	4
GO:0048662	negative regulation of smooth muscle cell proliferation	5/261	69/18866	0.0026658	0.0178747	0.0119991	SOD2/NPR3/TNFAIP3/APLN/TRIB1	5
GO:0008585	female gonad development	6/261	100/18866	0.00266821	0.0178747	0.0119991	KITLG/ICAM1/INHBA/FST/LHX9/PTX3	6
GO:0009597	detection of virus	2/261	6/18866	0.0027569	0.0182855	0.0122749	DDX58/IFIH1	2
GO:0010757	negative regulation of plasminogen activation	2/261	6/18866	0.0027569	0.0182855	0.0122749	SERPINE2/THBS1	2
GO:0014916	regulation of lung blood pressure	2/261	6/18866	0.0027569	0.0182855	0.0122749	NAMPT/GCH1	2
GO:0045917	positive regulation of complement activation	2/261	6/18866	0.0027569	0.0182855	0.0122749	IL1B/C3	2
GO:0072679	thymocyte migration	2/261	6/18866	0.0027569	0.0182855	0.0122749	CCL20/ADAM8	2
GO:1903721	positive regulation of I-kappaB phosphorylation	2/261	6/18866	0.0027569	0.0182855	0.0122749	CX3CL1/TNF	2
GO:2000630	positive regulation of miRNA metabolic process	2/261	6/18866	0.0027569	0.0182855	0.0122749	NFKB1/ZC3H12A	2
GO:0050679	positive regulation of epithelial cell proliferation	9/261	211/18866	0.00276115	0.0182878	0.0122764	B4GALT1/TNFAIP3/ID1/KDR/DYSF/CLDN1/LRG1/APLN/CCL5	9
GO:0050714	positive regulation of protein secretion	8/261	172/18866	0.00276912	0.0182887	0.012277	P2RX7/IL1A/IL6/TLR2/ADAM8/CLEC4E/SAA1/TNF	8
GO:0070304	positive regulation of stress-activated protein kinase signaling cascade	8/261	172/18866	0.00276912	0.0182887	0.012277	TRAF1/SEMA3A/RIPK2/IL1B/ZC3H12A/ERN1/TNF/LYN	8
GO:0050768	negative regulation of neurogenesis	11/261	295/18866	0.00280161	0.0184706	0.0123991	CX3CL1/SEMA3A/SEMA3C/JAG1/IL1B/ID1/LDLR/IL6/SEMA6C/SEMA3D/TNF	11
GO:0032637	interleukin-8 production	6/261	101/18866	0.00280456	0.0184706	0.0123991	DDX58/IL1B/IL6/TLR2/LGALS9/TNF	6
GO:0002534	cytokine production involved in inflammatory response	5/261	70/18866	0.00283903	0.0186713	0.0125338	IL6/GBP5/ZC3H12A/PER1/TNF	5
GO:0051896	regulation of protein kinase B signaling	10/261	253/18866	0.00284691	0.0186884	0.0125453	CX3CL1/KITLG/CSF3/GDF15/THBS1/FGF5/ADAM8/IRS1/C1QTNF1/TNF	10
GO:0030278	regulation of ossification	9/261	212/18866	0.00284962	0.0186884	0.0125453	P2RX7/JAG1/ZBTB16/ID1/IL6/SMAD6/GREM1/CSF1/TNF	9
GO:0030517	negative regulation of axon extension	4/261	43/18866	0.00289195	0.0188012	0.012621	SEMA3A/SEMA3C/SEMA6C/SEMA3D	4
GO:0002693	positive regulation of cellular extravasation	3/261	21/18866	0.00289496	0.0188012	0.012621	SELE/ICAM1/ADAM8	3
GO:0009110	vitamin biosynthetic process	3/261	21/18866	0.00289496	0.0188012	0.012621	NFKB1/IL1B/TNF	3
GO:0010829	negative regulation of glucose transmembrane transport	3/261	21/18866	0.00289496	0.0188012	0.012621	IL1B/PID1/TNF	3
GO:0035929	steroid hormone secretion	3/261	21/18866	0.00289496	0.0188012	0.012621	INHBA/NKX3-1/C1QTNF1	3
GO:0046641	positive regulation of alpha-beta T cell proliferation	3/261	21/18866	0.00289496	0.0188012	0.012621	RIPK2/IL23A/LGALS9	3
GO:1903978	regulation of microglial cell activation	3/261	21/18866	0.00289496	0.0188012	0.012621	CX3CL1/LDLR/IL6	3
GO:0045089	positive regulation of innate immune response	9/261	213/18866	0.00294031	0.0190692	0.0128009	RELB/NFKB1/ADAM8/GBP5/CLEC4E/HLA-F/LYN/IKBKE/CCL5	9
GO:0030183	B cell differentiation	7/261	137/18866	0.00299688	0.0194091	0.0130291	POU2F2/HDAC9/CYLD/JAK3/INHBA/IL6/VCAM1	7
GO:0034329	cell junction assembly	14/261	434/18866	0.003015	0.0194995	0.0130898	LAMC2/LIMS2/IL1B/KDR/TLR2/THBS1/PHLDB2/CLDN14/CLDN1/ITGA2/GREM1/DNER/LAMB3/TNF	14
GO:0010721	negative regulation of cell development	12/261	343/18866	0.00308328	0.0199135	0.0133677	CX3CL1/SEMA3A/SEMA3C/JAG1/GBP1/IL1B/ID1/LDLR/IL6/SEMA6C/SEMA3D/TNF	12
GO:0097028	dendritic cell differentiation	4/261	44/18866	0.00314706	0.0202138	0.0135693	RELB/BATF2/LGALS9/LYN	4
GO:1902667	regulation of axon guidance	4/261	44/18866	0.00314706	0.0202138	0.0135693	SEMA3A/SEMA3C/SEMA6C/SEMA3D	4
GO:1905521	regulation of macrophage migration	4/261	44/18866	0.00314706	0.0202138	0.0135693	CX3CL1/THBS1/CSF1/CCL5	4
GO:2000404	regulation of T cell migration	4/261	44/18866	0.00314706	0.0202138	0.0135693	CCL20/ADAM8/CXCL10/CCL5	4
GO:0010634	positive regulation of epithelial cell migration	8/261	176/18866	0.00318781	0.0204475	0.0137262	HDAC9/KDR/ETS1/THBS1/PLPP3/ZC3H12A/ITGA2/ATOH8	8
GO:0010888	negative regulation of lipid storage	3/261	22/18866	0.00331808	0.0210235	0.0141129	NFKBIA/IL6/TNF	3
GO:0035584	calcium-mediated signaling using intracellular calcium source	3/261	22/18866	0.00331808	0.0210235	0.0141129	CCL20/KDR/VCAM1	3
GO:0042359	vitamin D metabolic process	3/261	22/18866	0.00331808	0.0210235	0.0141129	NFKB1/IL1B/TNF	3
GO:0043369	CD4-positive or CD8-positive, alpha-beta T cell lineage commitment	3/261	22/18866	0.00331808	0.0210235	0.0141129	CYLD/IL23A/IL6	3
GO:0045624	positive regulation of T-helper cell differentiation	3/261	22/18866	0.00331808	0.0210235	0.0141129	RIPK2/IL23A/NFKBIZ	3
GO:0050765	negative regulation of phagocytosis	3/261	22/18866	0.00331808	0.0210235	0.0141129	DYSF/TLR2/CD47	3
GO:0051000	positive regulation of nitric-oxide synthase activity	3/261	22/18866	0.00331808	0.0210235	0.0141129	NPR3/GCH1/TNF	3
GO:0051900	regulation of mitochondrial depolarization	3/261	22/18866	0.00331808	0.0210235	0.0141129	P2RX7/KDR/HSH2D	3
GO:2000316	regulation of T-helper 17 type immune response	3/261	22/18866	0.00331808	0.0210235	0.0141129	IL23A/NFKBIZ/ZC3H12A	3
GO:0044070	regulation of anion transport	6/261	105/18866	0.00340266	0.0214721	0.014414	SLC12A2/P2RX7/CA2/IL1B/THBS1/TCAF2	6
GO:0046545	development of primary female sexual characteristics	6/261	105/18866	0.00340266	0.0214721	0.014414	KITLG/ICAM1/INHBA/FST/LHX9/PTX3	6
GO:0048259	regulation of receptor-mediated endocytosis	6/261	105/18866	0.00340266	0.0214721	0.014414	SELE/SGIP1/C3/DAB2/GREM1/APLN	6
GO:0045429	positive regulation of nitric oxide biosynthetic process	4/261	45/18866	0.00341711	0.0215052	0.0144362	ICAM1/IL1B/PTX3/TNF	4
GO:0052372	modulation by symbiont of entry into host	4/261	45/18866	0.00341711	0.0215052	0.0144362	TRIM22/PTX3/LGALS9/CXCL8	4
GO:0042742	defense response to bacterium	12/261	348/18866	0.00346325	0.0217664	0.0146115	P2RX7/RIPK2/IL23A/CCL20/CXCL6/IL6/TLR2/GBP2/GBP4/CLEC4E/LTA/TNF	12
GO:0001889	liver development	7/261	141/18866	0.0035155	0.022065	0.014812	LIMS2/CEACAM1/HMGCS1/TNFAIP3/IL6/CLDN1/ITGA2	7
GO:0014812	muscle cell migration	6/261	106/18866	0.00356596	0.0223518	0.0150045	PLAT/PLAU/DOCK4/ITGA2/TRIB1/CCL5	6
GO:0048511	rhythmic process	11/261	305/18866	0.0036081	0.0225856	0.0151615	NFKB2/RELB/NAMPT/INHBA/ID1/BHLHE40/ETS1/TIMP4/PTX3/GPR176/PER1	11
GO:0034121	regulation of toll-like receptor signaling pathway	5/261	74/18866	0.00361399	0.0225923	0.0151659	BIRC3/TNFAIP3/IRF1/TLR2/LYN	5
GO:0030336	negative regulation of cell migration	12/261	350/18866	0.00362546	0.0226337	0.0151938	CX3CL1/NAV3/SEMA3A/ANGPT2/JAG1/CCL2/THBS1/PHLDB2/IL24/GREM1/TRIB1/TNF	12
GO:0046425	regulation of receptor signaling pathway via JAK-STAT	7/261	142/18866	0.00365522	0.0227891	0.0152981	JAK3/IL23A/IL6/IL24/TNF/LYN/CCL5	7
GO:0032692	negative regulation of interleukin-1 production	4/261	46/18866	0.00370248	0.0229309	0.0153932	CX3CL1/CEACAM1/TNFAIP3/ZC3H12A	4
GO:0035987	endodermal cell differentiation	4/261	46/18866	0.00370248	0.0229309	0.0153932	INHBA/HMGA2/SOX17/LAMB3	4
GO:0043330	response to exogenous dsRNA	4/261	46/18866	0.00370248	0.0229309	0.0153932	NFKBIA/RIPK2/DDX58/IFIH1	4
GO:0061028	establishment of endothelial barrier	4/261	46/18866	0.00370248	0.0229309	0.0153932	ICAM1/IL1B/CLDN1/TNF	4
GO:1900744	regulation of p38MAPK cascade	4/261	46/18866	0.00370248	0.0229309	0.0153932	CYLD/IL1B/ZC3H12A/PER1	4
GO:1903426	regulation of reactive oxygen species biosynthetic process	6/261	107/18866	0.00373503	0.022956	0.0154101	ICAM1/IL1B/PTX3/ZC3H12A/CD47/TNF	6
GO:0016338	calcium-independent cell-cell adhesion via plasma membrane cell-adhesion molecules	3/261	23/18866	0.00377715	0.022956	0.0154101	CX3CL1/CLDN14/CLDN1	3
GO:0032693	negative regulation of interleukin-10 production	3/261	23/18866	0.00377715	0.022956	0.0154101	JAK3/IL23A/TNFRSF21	3
GO:0032703	negative regulation of interleukin-2 production	3/261	23/18866	0.00377715	0.022956	0.0154101	NAV3/GBP1/TNFAIP3	3
GO:0042401	cellular biogenic amine biosynthetic process	3/261	23/18866	0.00377715	0.022956	0.0154101	SMOX/ODC1/SAT1	3
GO:0045649	regulation of macrophage differentiation	3/261	23/18866	0.00377715	0.022956	0.0154101	INHBA/TRIB1/CSF1	3
GO:0060149	negative regulation of posttranscriptional gene silencing	3/261	23/18866	0.00377715	0.022956	0.0154101	IL6/ZC3H12A/TNF	3
GO:0060967	negative regulation of gene silencing by RNA	3/261	23/18866	0.00377715	0.022956	0.0154101	IL6/ZC3H12A/TNF	3
GO:1900017	positive regulation of cytokine production involved in inflammatory response	3/261	23/18866	0.00377715	0.022956	0.0154101	IL6/GBP5/TNF	3
GO:1903077	negative regulation of protein localization to plasma membrane	3/261	23/18866	0.00377715	0.022956	0.0154101	GBP1/DAB2/PID1	3
GO:1903798	regulation of production of miRNAs involved in gene silencing by miRNA	3/261	23/18866	0.00377715	0.022956	0.0154101	IL6/ZC3H12A/TNF	3
GO:1905330	regulation of morphogenesis of an epithelium	8/261	181/18866	0.00377861	0.022956	0.0154101	NTN4/PLEKHA4/PHLDB2/DAB2/GREM1/CXCL10/ROR1/TNF	8
GO:0001915	negative regulation of T cell mediated cytotoxicity	2/261	7/18866	0.00382449	0.022956	0.0154101	CEACAM1/IL7R	2
GO:0009445	putrescine metabolic process	2/261	7/18866	0.00382449	0.022956	0.0154101	ODC1/SAT1	2
GO:0010536	positive regulation of activation of Janus kinase activity	2/261	7/18866	0.00382449	0.022956	0.0154101	IL23A/CCL5	2
GO:0031622	positive regulation of fever generation	2/261	7/18866	0.00382449	0.022956	0.0154101	IL1B/TNF	2
GO:0032914	positive regulation of transforming growth factor beta1 production	2/261	7/18866	0.00382449	0.022956	0.0154101	CX3CL1/THBS1	2
GO:0045906	negative regulation of vasoconstriction	2/261	7/18866	0.00382449	0.022956	0.0154101	DOCK4/APLN	2
GO:0061044	negative regulation of vascular wound healing	2/261	7/18866	0.00382449	0.022956	0.0154101	SLC12A2/TNF	2
GO:0061518	microglial cell proliferation	2/261	7/18866	0.00382449	0.022956	0.0154101	CX3CL1/CSF1	2
GO:1901142	insulin metabolic process	2/261	7/18866	0.00382449	0.022956	0.0154101	CEACAM1/ERN1	2
GO:1903003	positive regulation of protein deubiquitination	2/261	7/18866	0.00382449	0.022956	0.0154101	TNIP1/ZC3H12A	2
GO:1904141	positive regulation of microglial cell migration	2/261	7/18866	0.00382449	0.022956	0.0154101	CX3CL1/CSF1	2
GO:2000660	negative regulation of interleukin-1-mediated signaling pathway	2/261	7/18866	0.00382449	0.022956	0.0154101	IL6/IL1RN	2
GO:0045685	regulation of glial cell differentiation	5/261	75/18866	0.00382927	0.022956	0.0154101	LDLR/SERPINE2/IL6/TLR2/TNFRSF21	5
GO:0002700	regulation of production of molecular mediator of immune response	7/261	144/18866	0.0039473	0.0236333	0.0158648	JAK3/DDX58/IL1B/IL6/GPRC5B/HLA-F/TNF	7
GO:0051222	positive regulation of protein transport	12/261	354/18866	0.00396827	0.0237284	0.0159286	P2RX7/IL1A/IL1B/IL6/TLR2/ADAM8/ZC3H12A/CLEC4E/TCAF2/ABLIM3/SAA1/TNF	12
GO:0014075	response to amine	4/261	47/18866	0.0040036	0.0237876	0.0159684	HDAC9/ICAM1/NR4A2/ITGA2	4
GO:0030225	macrophage differentiation	4/261	47/18866	0.0040036	0.0237876	0.0159684	INHBA/TLR2/TRIB1/CSF1	4
GO:0042551	neuron maturation	4/261	47/18866	0.0040036	0.0237876	0.0159684	CX3CL1/NTN4/C3/NR4A2	4
GO:0043300	regulation of leukocyte degranulation	4/261	47/18866	0.0040036	0.0237876	0.0159684	CEACAM1/LGALS9/HLA-F/LYN	4
GO:0050919	negative chemotaxis	4/261	47/18866	0.0040036	0.0237876	0.0159684	SEMA3A/SEMA3C/SEMA6C/SEMA3D	4
GO:0046883	regulation of hormone secretion	10/261	267/18866	0.00416821	0.0246922	0.0165756	INHBA/IL1B/IL6/CACNA1A/NKX3-1/IRS1/APLN/C1QTNF1/TNF/CCL5	10
GO:0001936	regulation of endothelial cell proliferation	8/261	184/18866	0.00417169	0.0246922	0.0165756	CCL2/KDR/DYSF/THBS1/ATOH8/LRG1/APLN/TNF	8
GO:0046328	regulation of JNK cascade	8/261	184/18866	0.00417169	0.0246922	0.0165756	TRAF1/SEMA3A/CYLD/RIPK2/IL1B/ERN1/PER1/TNF	8
GO:0045732	positive regulation of protein catabolic process	9/261	225/18866	0.00421677	0.0249274	0.0167335	TNFAIP3/IL1B/LDLR/HECW2/ADAM8/DAB2/SOX17/TRIB1/TNF	9
GO:0002719	negative regulation of cytokine production involved in immune response	3/261	24/18866	0.00427305	0.0250673	0.0168274	JAK3/HLA-F/TNF	3
GO:0009309	amine biosynthetic process	3/261	24/18866	0.00427305	0.0250673	0.0168274	SMOX/ODC1/SAT1	3
GO:0051882	mitochondrial depolarization	3/261	24/18866	0.00427305	0.0250673	0.0168274	P2RX7/KDR/HSH2D	3
GO:0060396	growth hormone receptor signaling pathway	3/261	24/18866	0.00427305	0.0250673	0.0168274	JAK3/GDF15/LYN	3
GO:1903306	negative regulation of regulated secretory pathway	3/261	24/18866	0.00427305	0.0250673	0.0168274	CEACAM1/LGALS9/HLA-F	3
GO:0090100	positive regulation of transmembrane receptor protein serine/threonine kinase signaling pathway	6/261	110/18866	0.00427796	0.0250673	0.0168274	INHBA/GDF15/THBS1/DAB2/MSX1/LRG1	6
GO:1904659	glucose transmembrane transport	6/261	110/18866	0.00427796	0.0250673	0.0168274	IL1B/C3/PID1/SLC2A6/IRS1/TNF	6
GO:1904064	positive regulation of cation transmembrane transport	7/261	147/18866	0.00441821	0.0258568	0.0173574	CX3CL1/CCL2/KCNJ2/CNKSR3/CTSS/CXCL10/CXCL11	7
GO:0060395	SMAD protein signal transduction	5/261	78/18866	0.00453013	0.0264786	0.0177748	INHBA/GDF15/SMAD6/DAB2/ATOH8	5
GO:0090199	regulation of release of cytochrome c from mitochondria	4/261	49/18866	0.00465465	0.0271725	0.0182406	PLAUR/BMF/TNFSF10/BCL2L11	4
GO:0007492	endoderm development	5/261	79/18866	0.00478276	0.0276455	0.0185581	DUSP4/INHBA/HMGA2/SOX17/LAMB3	5
GO:0010827	regulation of glucose transmembrane transport	5/261	79/18866	0.00478276	0.0276455	0.0185581	IL1B/C3/PID1/IRS1/TNF	5
GO:0070373	negative regulation of ERK1 and ERK2 cascade	5/261	79/18866	0.00478276	0.0276455	0.0185581	GBP1/DUSP4/TNIP1/CNKSR3/LYN	5
GO:0071260	cellular response to mechanical stimulus	5/261	79/18866	0.00478276	0.0276455	0.0185581	NFKB1/KCNJ2/IRF1/IL1B/ITGA2	5
GO:0002092	positive regulation of receptor internalization	3/261	25/18866	0.00480662	0.0276455	0.0185581	SELE/GREM1/APLN	3
GO:0032647	regulation of interferon-alpha production	3/261	25/18866	0.00480662	0.0276455	0.0185581	RIPK2/DDX58/IFIH1	3
GO:0039529	RIG-I signaling pathway	3/261	25/18866	0.00480662	0.0276455	0.0185581	BIRC3/DDX58/DHX58	3
GO:0050927	positive regulation of positive chemotaxis	3/261	25/18866	0.00480662	0.0276455	0.0185581	KDR/ITGA2/CXCL8	3
GO:0070920	regulation of production of small RNA involved in gene silencing by RNA	3/261	25/18866	0.00480662	0.0276455	0.0185581	IL6/ZC3H12A/TNF	3
GO:0071378	cellular response to growth hormone stimulus	3/261	25/18866	0.00480662	0.0276455	0.0185581	JAK3/GDF15/LYN	3
GO:0071677	positive regulation of mononuclear cell migration	3/261	25/18866	0.00480662	0.0276455	0.0185581	CXCL10/TNF/CCL5	3
GO:1904376	negative regulation of protein localization to cell periphery	3/261	25/18866	0.00480662	0.0276455	0.0185581	GBP1/DAB2/PID1	3
GO:0035821	modulation of process of other organism	6/261	113/18866	0.00487708	0.0280162	0.018807	TNIP1/HMGA2/BCL2L11/PTX3/ZC3H12A/CCL5	6
GO:0043534	blood vessel endothelial cell migration	8/261	189/18866	0.00489604	0.0280906	0.0188569	HDAC9/ANGPT2/ID1/KDR/ETS1/THBS1/GREM1/TNF	8
GO:0010718	positive regulation of epithelial to mesenchymal transition	4/261	50/18866	0.00500535	0.0285011	0.0191325	JAG1/IL1B/IL6/DAB2	4
GO:0070671	response to interleukin-12	4/261	50/18866	0.00500535	0.0285011	0.0191325	RALA/RIPK2/SOD2/CD47	4
GO:2000146	negative regulation of cell motility	12/261	365/18866	0.0050472	0.0285011	0.0191325	CX3CL1/NAV3/SEMA3A/ANGPT2/JAG1/CCL2/THBS1/PHLDB2/IL24/GREM1/TRIB1/TNF	12
GO:0003018	vascular process in circulatory system	8/261	190/18866	0.0050518	0.0285011	0.0191325	CEACAM1/ICAM1/SOD2/DOCK4/GCH1/APLN/C2CD4A/C2CD4B	8
GO:0051048	negative regulation of secretion	8/261	190/18866	0.0050518	0.0285011	0.0191325	HDAC9/CEACAM1/INHBA/IL1B/RHBDF2/LGALS9/IRS1/HLA-F	8
GO:0030853	negative regulation of granulocyte differentiation	2/261	8/18866	0.00505291	0.0285011	0.0191325	CEACAM1/TRIB1	2
GO:0031620	regulation of fever generation	2/261	8/18866	0.00505291	0.0285011	0.0191325	IL1B/TNF	2
GO:0033084	regulation of immature T cell proliferation in thymus	2/261	8/18866	0.00505291	0.0285011	0.0191325	IL1A/IL1B	2
GO:0061888	regulation of astrocyte activation	2/261	8/18866	0.00505291	0.0285011	0.0191325	LDLR/IL6	2
GO:1903719	regulation of I-kappaB phosphorylation	2/261	8/18866	0.00505291	0.0285011	0.0191325	CX3CL1/TNF	2
GO:1903979	negative regulation of microglial cell activation	2/261	8/18866	0.00505291	0.0285011	0.0191325	CX3CL1/LDLR	2
GO:1904124	microglial cell migration	2/261	8/18866	0.00505291	0.0285011	0.0191325	CX3CL1/CSF1	2
GO:1904139	regulation of microglial cell migration	2/261	8/18866	0.00505291	0.0285011	0.0191325	CX3CL1/CSF1	2
GO:2000427	positive regulation of apoptotic cell clearance	2/261	8/18866	0.00505291	0.0285011	0.0191325	CCL2/C3	2
GO:0008645	hexose transmembrane transport	6/261	114/18866	0.00508985	0.0286748	0.0192491	IL1B/C3/PID1/SLC2A6/IRS1/TNF	6
GO:0051098	regulation of binding	12/261	367/18866	0.00526641	0.0296339	0.0198929	PLAUR/CYLD/NFKBIA/RIPK2/CSF3/IFIT2/ID1/HMGA2/DAB2/MSX1/ITGA2/NKX3-1	12
GO:1901214	regulation of neuron death	11/261	321/18866	0.00527564	0.0296501	0.0199038	CX3CL1/CSF3/CCL2/SOD2/ADAM8/BCL2L11/NR4A2/CSF1/HLA-F/TNF/CCL5	11
GO:0031623	receptor internalization	6/261	115/18866	0.00530934	0.029768	0.0199829	SELE/CEACAM1/GREM1/CXCL8/APLN/MX2	6
GO:0048640	negative regulation of developmental growth	6/261	115/18866	0.00530934	0.029768	0.0199829	SEMA3A/SEMA3C/STC2/GDF15/SEMA6C/SEMA3D	6
GO:0002762	negative regulation of myeloid leukocyte differentiation	4/261	51/18866	0.00537334	0.0297992	0.0200039	CEACAM1/INHBA/TRIB1/LYN	4
GO:0006984	ER-nucleus signaling pathway	4/261	51/18866	0.00537334	0.0297992	0.0200039	CCL2/BCL2L11/CXCL8/INSIG1	4
GO:0071354	cellular response to interleukin-6	4/261	51/18866	0.00537334	0.0297992	0.0200039	ICAM1/NFKB1/IL6/PID1	4
GO:0002507	tolerance induction	3/261	26/18866	0.00537865	0.0297992	0.0200039	TNFAIP3/LGALS9/LYN	3
GO:0019430	removal of superoxide radicals	3/261	26/18866	0.00537865	0.0297992	0.0200039	SOD2/GCH1/TNF	3
GO:0031664	regulation of lipopolysaccharide-mediated signaling pathway	3/261	26/18866	0.00537865	0.0297992	0.0200039	CX3CL1/TNFAIP3/TRIB1	3
GO:0032743	positive regulation of interleukin-2 production	3/261	26/18866	0.00537865	0.0297992	0.0200039	RIPK2/IL1A/IL1B	3
GO:0036315	cellular response to sterol	3/261	26/18866	0.00537865	0.0297992	0.0200039	HMGCS1/INHBA/INSIG1	3
GO:0042832	defense response to protozoan	3/261	26/18866	0.00537865	0.0297992	0.0200039	GBP2/GBP4/BATF2	3
GO:0090023	positive regulation of neutrophil chemotaxis	3/261	26/18866	0.00537865	0.0297992	0.0200039	IL23A/DYSF/CXCL8	3
GO:0045861	negative regulation of proteolysis	12/261	369/18866	0.00549314	0.0303976	0.0204055	PLAUR/BIRC3/CD44/LAMP3/PLAT/TFPI2/C3/SERPINE2/THBS1/TNFAIP8/TIMP4/TNF	12
GO:0015749	monosaccharide transmembrane transport	6/261	116/18866	0.0055357	0.0305969	0.0205393	IL1B/C3/PID1/SLC2A6/IRS1/TNF	6
GO:0022617	extracellular matrix disassembly	5/261	82/18866	0.00560057	0.0308824	0.020731	CD44/ETS1/IL6/ADAM8/CTSS	5
GO:1902930	regulation of alcohol biosynthetic process	5/261	82/18866	0.00560057	0.0308824	0.020731	SQLE/NFKB1/HMGCS1/IL1B/TNF	5
GO:1904951	positive regulation of establishment of protein localization	12/261	370/18866	0.00560939	0.0308946	0.0207392	P2RX7/IL1A/IL1B/IL6/TLR2/ADAM8/ZC3H12A/CLEC4E/TCAF2/ABLIM3/SAA1/TNF	12
GO:0002262	myeloid cell homeostasis	7/261	154/18866	0.00568132	0.0312539	0.0209804	KITLG/JAK3/INHBA/ETS1/IL6/BCL2L11/LYN	7
GO:1903557	positive regulation of tumor necrosis factor superfamily cytokine production	4/261	52/18866	0.00575898	0.031644	0.0212422	RIPK2/IL23A/TLR2/ADAM8	4
GO:0051341	regulation of oxidoreductase activity	6/261	117/18866	0.00576904	0.031662	0.0212543	NFKB1/NPR3/IL1A/IL1B/GCH1/TNF	6
GO:0032872	regulation of stress-activated MAPK cascade	9/261	237/18866	0.0058902	0.032271	0.0216632	TRAF1/SEMA3A/CYLD/RIPK2/IL1B/ZC3H12A/ERN1/PER1/TNF	9
GO:0048041	focal adhesion assembly	5/261	83/18866	0.0058938	0.032271	0.0216632	KDR/THBS1/PHLDB2/ITGA2/GREM1	5
GO:0001562	response to protozoan	3/261	27/18866	0.00598986	0.032644	0.0219136	GBP2/GBP4/BATF2	3
GO:0032607	interferon-alpha production	3/261	27/18866	0.00598986	0.032644	0.0219136	RIPK2/DDX58/IFIH1	3
GO:0034698	response to gonadotropin	3/261	27/18866	0.00598986	0.032644	0.0219136	ICAM1/HMGCS1/INHBA	3
GO:1901623	regulation of lymphocyte chemotaxis	3/261	27/18866	0.00598986	0.032644	0.0219136	CCL2/CXCL10/CCL5	3
GO:0034219	carbohydrate transmembrane transport	6/261	118/18866	0.00600947	0.0326748	0.0219342	IL1B/C3/PID1/SLC2A6/IRS1/TNF	6
GO:0050868	negative regulation of T cell activation	6/261	118/18866	0.00600947	0.0326748	0.0219342	CEACAM1/JAK3/IRF1/TNFRSF21/ZC3H12A/LGALS9	6
GO:0050728	negative regulation of inflammatory response	8/261	196/18866	0.00606757	0.0329523	0.0221205	CX3CL1/NFKB1/TNFAIP3/TNFAIP6/LDLR/ETS1/ZC3H12A/SAA1	8
GO:0043124	negative regulation of I-kappaB kinase/NF-kappaB signaling	4/261	53/18866	0.00616265	0.0333525	0.0223892	TNFAIP3/TNIP1/ZC3H12A/PER1	4
GO:0043392	negative regulation of DNA binding	4/261	53/18866	0.00616265	0.0333525	0.0223892	NFKBIA/ID1/HMGA2/MSX1	4
GO:0045668	negative regulation of osteoblast differentiation	4/261	53/18866	0.00616265	0.0333525	0.0223892	ID1/SMAD6/GREM1/TNF	4
GO:0006898	receptor-mediated endocytosis	11/261	328/18866	0.00617415	0.0333761	0.022405	SELE/CEACAM1/SGIP1/C3/LDLR/DAB2/GREM1/CXCL8/APLN/SAA1/MX2	11
GO:0050886	endocrine process	5/261	84/18866	0.00619768	0.0334646	0.0224644	INHBA/IL1B/NKX3-1/APLN/C1QTNF1	5
GO:0001822	kidney development	10/261	283/18866	0.00622667	0.0335437	0.0225175	ANGPT2/JAG1/CA2/ZBTB16/ODC1/SMAD6/BCL2L11/SOX17/GREM1/NKX3-1	10
GO:0032868	response to insulin	10/261	283/18866	0.00622667	0.0335437	0.0225175	HDAC9/CEACAM1/ICAM1/TNFSF10/IL1B/TLR2/PID1/IRS1/INSIG1/LYN	10
GO:0010822	positive regulation of mitochondrion organization	6/261	119/18866	0.00625713	0.0336303	0.0225757	PLAUR/BMF/TNFSF10/KDR/BCL2L11/ABLIM3	6
GO:0046660	female sex differentiation	6/261	119/18866	0.00625713	0.0336303	0.0225757	KITLG/ICAM1/INHBA/FST/LHX9/PTX3	6
GO:0043271	negative regulation of ion transport	7/261	157/18866	0.00629838	0.0338131	0.0226984	ICAM1/DYSF/SERPINE2/THBS1/HECW2/RRAD/TCAF2	7
GO:0002634	regulation of germinal center formation	2/261	9/18866	0.00643753	0.0340905	0.0228846	TNFSF13B/TNFAIP3	2
GO:0010533	regulation of activation of Janus kinase activity	2/261	9/18866	0.00643753	0.0340905	0.0228846	IL23A/CCL5	2
GO:0010692	regulation of alkaline phosphatase activity	2/261	9/18866	0.00643753	0.0340905	0.0228846	ITGA2/TNF	2
GO:0033080	immature T cell proliferation in thymus	2/261	9/18866	0.00643753	0.0340905	0.0228846	IL1A/IL1B	2
GO:0034112	positive regulation of homotypic cell-cell adhesion	2/261	9/18866	0.00643753	0.0340905	0.0228846	PLAUR/CCL5	2
GO:0060054	positive regulation of epithelial cell proliferation involved in wound healing	2/261	9/18866	0.00643753	0.0340905	0.0228846	B4GALT1/CLDN1	2
GO:0060693	regulation of branching involved in salivary gland morphogenesis	2/261	9/18866	0.00643753	0.0340905	0.0228846	NTN4/TNF	2
GO:0061309	cardiac neural crest cell development involved in outflow tract morphogenesis	2/261	9/18866	0.00643753	0.0340905	0.0228846	SEMA3C/JAG1	2
GO:2000096	positive regulation of Wnt signaling pathway, planar cell polarity pathway	2/261	9/18866	0.00643753	0.0340905	0.0228846	PLEKHA4/DAB2	2
GO:2000321	positive regulation of T-helper 17 cell differentiation	2/261	9/18866	0.00643753	0.0340905	0.0228846	IL23A/NFKBIZ	2
GO:2000501	regulation of natural killer cell chemotaxis	2/261	9/18866	0.00643753	0.0340905	0.0228846	CCL2/CCL5	2
GO:2000833	positive regulation of steroid hormone secretion	2/261	9/18866	0.00643753	0.0340905	0.0228846	NKX3-1/C1QTNF1	2
GO:0001655	urogenital system development	11/261	330/18866	0.0064518	0.0341274	0.0229093	ANGPT2/JAG1/CA2/ZBTB16/ODC1/SMAD6/BCL2L11/NFIA/SOX17/GREM1/NKX3-1	11
GO:0110110	positive regulation of animal organ morphogenesis	5/261	85/18866	0.00651241	0.0344091	0.0230984	SEMA3C/JAG1/TNFAIP3/GREM1/CSF1	5
GO:0010524	positive regulation of calcium ion transport into cytosol	4/261	54/18866	0.0065847	0.0347517	0.0233285	CX3CL1/P2RX7/CXCL10/CXCL11	4
GO:0001916	positive regulation of T cell mediated cytotoxicity	3/261	28/18866	0.00664093	0.0348518	0.0233957	P2RX7/IL23A/HLA-F	3
GO:0002360	T cell lineage commitment	3/261	28/18866	0.00664093	0.0348518	0.0233957	CYLD/IL23A/IL6	3
GO:0071450	cellular response to oxygen radical	3/261	28/18866	0.00664093	0.0348518	0.0233957	SOD2/GCH1/TNF	3
GO:0071451	cellular response to superoxide	3/261	28/18866	0.00664093	0.0348518	0.0233957	SOD2/GCH1/TNF	3
GO:2000191	regulation of fatty acid transport	3/261	28/18866	0.00664093	0.0348518	0.0233957	P2RX7/IL1B/THBS1	3
GO:1901888	regulation of cell junction assembly	8/261	200/18866	0.00682636	0.0357848	0.0240219	IL1B/KDR/TLR2/THBS1/PHLDB2/CLDN1/GREM1/TNF	8
GO:0014910	regulation of smooth muscle cell migration	5/261	86/18866	0.00683818	0.0358066	0.0240366	PLAU/DOCK4/ITGA2/TRIB1/CCL5	5
GO:0032720	negative regulation of tumor necrosis factor production	4/261	55/18866	0.00702546	0.0366232	0.0245848	CX3CL1/TNFAIP3/ZC3H12A/LGALS9	4
GO:0045620	negative regulation of lymphocyte differentiation	4/261	55/18866	0.00702546	0.0366232	0.0245848	JAK3/INHBA/IRF1/ZC3H12A	4
GO:0051353	positive regulation of oxidoreductase activity	4/261	55/18866	0.00702546	0.0366232	0.0245848	NPR3/IL1B/GCH1/TNF	4
GO:0070741	response to interleukin-6	4/261	55/18866	0.00702546	0.0366232	0.0245848	ICAM1/NFKB1/IL6/PID1	4
GO:0051928	positive regulation of calcium ion transport	6/261	122/18866	0.00704468	0.0366825	0.0246246	CX3CL1/P2RX7/CCL2/CXCL10/CXCL11/CCL5	6
GO:0051781	positive regulation of cell division	5/261	87/18866	0.00717518	0.0373205	0.0250529	IL1A/IL1B/FGF5/PDGFC/NKX3-1	5
GO:0019216	regulation of lipid metabolic process	13/261	431/18866	0.00725851	0.037712	0.0253157	CEACAM1/SQLE/NFKB1/HMGCS1/G0S2/IL1B/C3/LDLR/TNFRSF21/IRS1/INSIG1/TNF/LYN	13
GO:0042634	regulation of hair cycle	3/261	29/18866	0.00733248	0.0379697	0.0254887	FST/PER1/TNF	3
GO:0050901	leukocyte tethering or rolling	3/261	29/18866	0.00733248	0.0379697	0.0254887	SELE/VCAM1/TNF	3
GO:0071624	positive regulation of granulocyte chemotaxis	3/261	29/18866	0.00733248	0.0379697	0.0254887	IL23A/DYSF/CXCL8	3
GO:0002028	regulation of sodium ion transport	5/261	88/18866	0.00752361	0.0389164	0.0261241	P2RX7/SERPINE2/HECW2/CNKSR3/PER1	5
GO:0051101	regulation of DNA binding	6/261	124/18866	0.00760806	0.0393097	0.0263882	PLAUR/NFKBIA/ID1/HMGA2/MSX1/ITGA2	6
GO:0051604	protein maturation	10/261	293/18866	0.00786843	0.0402653	0.0270297	BIRC3/P2RX7/RIPK2/PLAT/PLAU/SERPINE2/THBS1/ADAM8/C1R/CTSS	10
GO:0008625	extrinsic apoptotic signaling pathway via death domain receptors	5/261	89/18866	0.00788365	0.0402653	0.0270297	ICAM1/TNFAIP3/TNFSF10/THBS1/TNF	5
GO:0008637	apoptotic mitochondrial changes	6/261	125/18866	0.00790161	0.0402653	0.0270297	PLAUR/BMF/SOD2/IFIT2/TNFSF10/BCL2L11	6
GO:0046165	alcohol biosynthetic process	7/261	164/18866	0.00793123	0.0402653	0.0270297	SQLE/NFKB1/HMGCS1/IL1B/GCH1/INSIG1/TNF	7
GO:0001541	ovarian follicle development	4/261	57/18866	0.0079645	0.0402653	0.0270297	KITLG/ICAM1/INHBA/PTX3	4
GO:0006576	cellular biogenic amine metabolic process	4/261	57/18866	0.0079645	0.0402653	0.0270297	SMOX/ODC1/SAT1/MAOA	4
GO:1903556	negative regulation of tumor necrosis factor superfamily cytokine production	4/261	57/18866	0.0079645	0.0402653	0.0270297	CX3CL1/TNFAIP3/ZC3H12A/LGALS9	4
GO:0002291	T cell activation via T cell receptor contact with antigen bound to MHC molecule on antigen presenting cell	2/261	10/18866	0.00797384	0.0402653	0.0270297	ICAM1/LGALS9	2
GO:0032308	positive regulation of prostaglandin secretion	2/261	10/18866	0.00797384	0.0402653	0.0270297	P2RX7/IL1B	2
GO:0034135	regulation of toll-like receptor 2 signaling pathway	2/261	10/18866	0.00797384	0.0402653	0.0270297	TNFAIP3/LYN	2
GO:0039530	MDA-5 signaling pathway	2/261	10/18866	0.00797384	0.0402653	0.0270297	DHX58/IFIH1	2
GO:0042117	monocyte activation	2/261	10/18866	0.00797384	0.0402653	0.0270297	DYSF/CSF1	2
GO:0045625	regulation of T-helper 1 cell differentiation	2/261	10/18866	0.00797384	0.0402653	0.0270297	RIPK2/JAK3	2
GO:0051901	positive regulation of mitochondrial depolarization	2/261	10/18866	0.00797384	0.0402653	0.0270297	P2RX7/KDR	2
GO:0060600	dichotomous subdivision of an epithelial terminal unit	2/261	10/18866	0.00797384	0.0402653	0.0270297	SEMA3A/SEMA3C	2
GO:0070391	response to lipoteichoic acid	2/261	10/18866	0.00797384	0.0402653	0.0270297	RIPK2/TLR2	2
GO:0070424	regulation of nucleotide-binding oligomerization domain containing signaling pathway	2/261	10/18866	0.00797384	0.0402653	0.0270297	BIRC3/TNFAIP3	2
GO:0071223	cellular response to lipoteichoic acid	2/261	10/18866	0.00797384	0.0402653	0.0270297	RIPK2/TLR2	2
GO:0140042	lipid droplet formation	2/261	10/18866	0.00797384	0.0402653	0.0270297	SQLE/PLA2G4C	2
GO:2000425	regulation of apoptotic cell clearance	2/261	10/18866	0.00797384	0.0402653	0.0270297	CCL2/C3	2
GO:2000659	regulation of interleukin-1-mediated signaling pathway	2/261	10/18866	0.00797384	0.0402653	0.0270297	IL6/IL1RN	2
GO:0000303	response to superoxide	3/261	30/18866	0.00806508	0.0405073	0.0271921	SOD2/GCH1/TNF	3
GO:0010758	regulation of macrophage chemotaxis	3/261	30/18866	0.00806508	0.0405073	0.0271921	THBS1/CSF1/CCL5	3
GO:0030511	positive regulation of transforming growth factor beta receptor signaling pathway	3/261	30/18866	0.00806508	0.0405073	0.0271921	THBS1/DAB2/LRG1	3
GO:0038111	interleukin-7-mediated signaling pathway	3/261	30/18866	0.00806508	0.0405073	0.0271921	JAK3/IL7R/IRS1	3
GO:1903846	positive regulation of cellular response to transforming growth factor beta stimulus	3/261	30/18866	0.00806508	0.0405073	0.0271921	THBS1/DAB2/LRG1	3
GO:0050852	T cell receptor signaling pathway	8/261	206/18866	0.00809647	0.0406214	0.0272687	CEACAM1/CYLD/RIPK2/NFKB1/GBP1/NFKBIZ/TNFRSF21/ZC3H12A	8
GO:0002011	morphogenesis of an epithelial sheet	4/261	58/18866	0.00846342	0.0424169	0.028474	CD44/CEACAM1/JAG1/PHLDB2	4
GO:0042475	odontogenesis of dentin-containing tooth	5/261	91/18866	0.00863933	0.0432059	0.0290037	CA2/FST/BCL2L11/MSX1/CSF1	5
GO:0051899	membrane depolarization	5/261	91/18866	0.00863933	0.0432059	0.0290037	P2RX7/KCNJ2/KDR/CACNA1A/HSH2D	5
GO:0000305	response to oxygen radical	3/261	31/18866	0.00883926	0.0440174	0.0295484	SOD2/GCH1/TNF	3
GO:0048710	regulation of astrocyte differentiation	3/261	31/18866	0.00883926	0.0440174	0.0295484	LDLR/SERPINE2/IL6	3
GO:1905476	negative regulation of protein localization to membrane	3/261	31/18866	0.00883926	0.0440174	0.0295484	GBP1/DAB2/PID1	3
GO:2000515	negative regulation of CD4-positive, alpha-beta T cell activation	3/261	31/18866	0.00883926	0.0440174	0.0295484	JAK3/ZC3H12A/LGALS9	3
GO:0006869	lipid transport	12/261	393/18866	0.00886777	0.0440704	0.029584	CEACAM1/P2RX7/NFKBIA/LIPG/NFKB1/INHBA/IL1B/LDLR/THBS1/NKX3-1/ABCA3/C1QTNF1	12
GO:0031668	cellular response to extracellular stimulus	9/261	253/18866	0.00886874	0.0440704	0.029584	P2RX7/ICAM1/NAMPT/NR4A2/VCAM1/NUAK2/ZC3H12A/FOSL1/LYN	9
GO:0090092	regulation of transmembrane receptor protein serine/threonine kinase signaling pathway	9/261	254/18866	0.00908696	0.0451068	0.0302797	INHBA/GDF15/FST/THBS1/SMAD6/DAB2/MSX1/GREM1/LRG1	9
GO:0051100	negative regulation of binding	7/261	169/18866	0.00927537	0.0459933	0.0308748	NFKBIA/IFIT2/ID1/HMGA2/DAB2/MSX1/NKX3-1	7
GO:0032088	negative regulation of NF-kappaB transcription factor activity	5/261	93/18866	0.00944371	0.0465546	0.0312516	CYLD/NFKBIA/TNFAIP3/IRAK2/ZC3H12A	5
GO:0051702	interaction with symbiont	5/261	93/18866	0.00944371	0.0465546	0.0312516	CXCL6/HMGA2/PTX3/ZC3H12A/CCL5	5
GO:0035904	aorta development	4/261	60/18866	0.00952165	0.0465546	0.0312516	ADAMTS6/JAG1/SMAD6/NKX3-1	4
GO:0048747	muscle fiber development	4/261	60/18866	0.00952165	0.0465546	0.0312516	HDAC9/NEBL/DYSF/DNER	4
GO:0050994	regulation of lipid catabolic process	4/261	60/18866	0.00952165	0.0465546	0.0312516	IL1B/LDLR/IRS1/TNF	4
GO:0097755	positive regulation of blood vessel diameter	4/261	60/18866	0.00952165	0.0465546	0.0312516	SOD2/DOCK4/GCH1/APLN	4
GO:1903428	positive regulation of reactive oxygen species biosynthetic process	4/261	60/18866	0.00952165	0.0465546	0.0312516	ICAM1/IL1B/PTX3/TNF	4
GO:1901215	negative regulation of neuron death	8/261	212/18866	0.0095364	0.0465546	0.0312516	CX3CL1/CSF3/CCL2/SOD2/ADAM8/NR4A2/CSF1/HLA-F	8
GO:0032874	positive regulation of stress-activated MAPK cascade	7/261	170/18866	0.00956305	0.0465546	0.0312516	TRAF1/SEMA3A/RIPK2/IL1B/ZC3H12A/ERN1/TNF	7
GO:1904062	regulation of cation transmembrane transport	11/261	349/18866	0.00960632	0.0465546	0.0312516	CX3CL1/CCL2/KCNJ2/DYSF/HECW2/CNKSR3/CTSS/RRAD/CXCL10/CXCL11/LYN	11
GO:0002724	regulation of T cell cytokine production	3/261	32/18866	0.00965549	0.0465546	0.0312516	IL1B/IL6/HLA-F	3
GO:0010743	regulation of macrophage derived foam cell differentiation	3/261	32/18866	0.00965549	0.0465546	0.0312516	NFKBIA/NFKB1/CSF1	3
GO:0032306	regulation of prostaglandin secretion	2/261	11/18866	0.0096574	0.0465546	0.0312516	P2RX7/IL1B	2
GO:0032908	regulation of transforming growth factor beta1 production	2/261	11/18866	0.0096574	0.0465546	0.0312516	CX3CL1/THBS1	2
GO:0035457	cellular response to interferon-alpha	2/261	11/18866	0.0096574	0.0465546	0.0312516	IFIT3/IFIT2	2
GO:0035747	natural killer cell chemotaxis	2/261	11/18866	0.0096574	0.0465546	0.0312516	CCL2/CCL5	2
GO:0040015	negative regulation of multicellular organism growth	2/261	11/18866	0.0096574	0.0465546	0.0312516	STC2/GDF15	2
GO:0060368	regulation of Fc receptor mediated stimulatory signaling pathway	2/261	11/18866	0.0096574	0.0465546	0.0312516	CD47/LYN	2
GO:0061307	cardiac neural crest cell differentiation involved in heart development	2/261	11/18866	0.0096574	0.0465546	0.0312516	SEMA3C/JAG1	2
GO:0061308	cardiac neural crest cell development involved in heart development	2/261	11/18866	0.0096574	0.0465546	0.0312516	SEMA3C/JAG1	2
GO:0071372	cellular response to follicle-stimulating hormone stimulus	2/261	11/18866	0.0096574	0.0465546	0.0312516	HMGCS1/INHBA	2
GO:0090557	establishment of endothelial intestinal barrier	2/261	11/18866	0.0096574	0.0465546	0.0312516	ICAM1/CLDN1	2
GO:0097048	dendritic cell apoptotic process	2/261	11/18866	0.0096574	0.0465546	0.0312516	LGALS9/LYN	2
GO:0098883	synapse pruning	2/261	11/18866	0.0096574	0.0465546	0.0312516	CX3CL1/C3	2
GO:2000318	positive regulation of T-helper 17 type immune response	2/261	11/18866	0.0096574	0.0465546	0.0312516	IL23A/NFKBIZ	2
GO:2000628	regulation of miRNA metabolic process	2/261	11/18866	0.0096574	0.0465546	0.0312516	NFKB1/ZC3H12A	2
GO:2000668	regulation of dendritic cell apoptotic process	2/261	11/18866	0.0096574	0.0465546	0.0312516	LGALS9/LYN	2
GO:0045667	regulation of osteoblast differentiation	6/261	131/18866	0.00983658	0.0473696	0.0317987	JAG1/ID1/IL6/SMAD6/GREM1/TNF	6
GO:0030856	regulation of epithelial cell differentiation	7/261	171/18866	0.00985721	0.0474201	0.0318326	CEACAM1/JAG1/IL1B/ID1/ATOH8/MAFF/TNF	7
GO:0010574	regulation of vascular endothelial growth factor production	4/261	61/18866	0.0100816	0.0483501	0.0324569	IL1A/IL1B/C3/IL6	4
GO:0031343	positive regulation of cell killing	4/261	61/18866	0.0100816	0.0483501	0.0324569	P2RX7/IL23A/BCL2L11/HLA-F	4
GO:1902041	regulation of extrinsic apoptotic signaling pathway via death domain receptors	4/261	61/18866	0.0100816	0.0483501	0.0324569	ICAM1/TNFAIP3/TNFSF10/THBS1	4
GO:0042476	odontogenesis	6/261	132/18866	0.0101891	0.0488159	0.0327696	CA2/INHBA/FST/BCL2L11/MSX1/CSF1	6
GO:0001975	response to amphetamine	3/261	33/18866	0.0105142	0.0497616	0.0334044	HDAC9/ICAM1/NR4A2	3
GO:0002691	regulation of cellular extravasation	3/261	33/18866	0.0105142	0.0497616	0.0334044	SELE/ICAM1/ADAM8	3
GO:0002861	regulation of inflammatory response to antigenic stimulus	3/261	33/18866	0.0105142	0.0497616	0.0334044	C3/LTA/TNF	3
GO:0010955	negative regulation of protein processing	3/261	33/18866	0.0105142	0.0497616	0.0334044	BIRC3/SERPINE2/THBS1	3
GO:0033028	myeloid cell apoptotic process	3/261	33/18866	0.0105142	0.0497616	0.0334044	KITLG/IL6/CCL5	3
GO:0044319	wound healing, spreading of cells	3/261	33/18866	0.0105142	0.0497616	0.0334044	CD44/CEACAM1/PHLDB2	3
GO:0045920	negative regulation of exocytosis	3/261	33/18866	0.0105142	0.0497616	0.0334044	CEACAM1/LGALS9/HLA-F	3
GO:0046627	negative regulation of insulin receptor signaling pathway	3/261	33/18866	0.0105142	0.0497616	0.0334044	IL1B/PID1/IRS1	3
GO:0061311	cell surface receptor signaling pathway involved in heart development	3/261	33/18866	0.0105142	0.0497616	0.0334044	JAG1/MSX1/SOX17	3
GO:0090022	regulation of neutrophil chemotaxis	3/261	33/18866	0.0105142	0.0497616	0.0334044	IL23A/DYSF/CXCL8	3
GO:0090505	epiboly involved in wound healing	3/261	33/18866	0.0105142	0.0497616	0.0334044	CD44/CEACAM1/PHLDB2	3
GO:1903318	negative regulation of protein maturation	3/261	33/18866	0.0105142	0.0497616	0.0334044	BIRC3/SERPINE2/THBS1	3
GO:0051851	modulation by host of symbiont process	4/261	62/18866	0.0106624	0.05031	0.0337726	HMGA2/PTX3/ZC3H12A/CCL5	4
GO:0070527	platelet aggregation	4/261	62/18866	0.0106624	0.05031	0.0337726	CEACAM1/SERPINE2/C1QTNF1/LYN	4
GO:2001244	positive regulation of intrinsic apoptotic signaling pathway	4/261	62/18866	0.0106624	0.05031	0.0337726	BMF/BCL2L11/MSX1/NKX3-1	4
GO:0003002	regionalization	11/261	355/18866	0.0108165	0.0509858	0.0342262	SEMA3A/SEMA3C/ZBTB16/C3/BHLHE40/SMAD6/MSX1/HHIP/SOX17/GREM1/NKX3-1	11
GO:0002920	regulation of humoral immune response	6/261	134/18866	0.010921	0.0514264	0.034522	IL1B/C3/C1R/C1S/LTA/TNF	6
GO:0050680	negative regulation of epithelial cell proliferation	7/261	175/18866	0.0111002	0.0522177	0.0350532	LIMS2/CEACAM1/CCL2/THBS1/NKX3-1/ATOH8/TNF	7
GO:0051893	regulation of focal adhesion assembly	4/261	63/18866	0.0112644	0.0525941	0.0353059	KDR/THBS1/PHLDB2/GREM1	4
GO:0090109	regulation of cell-substrate junction assembly	4/261	63/18866	0.0112644	0.0525941	0.0353059	KDR/THBS1/PHLDB2/GREM1	4
GO:0018105	peptidyl-serine phosphorylation	10/261	310/18866	0.0114031	0.0525941	0.0353059	CD44/RIPK2/CSF3/IL6/HMGA2/CNKSR3/IL24/ERN1/TNF/IKBKE	10
GO:0090287	regulation of cellular response to growth factor stimulus	10/261	310/18866	0.0114031	0.0525941	0.0353059	IL1B/FST/THBS1/SMAD6/DAB2/MSX1/HHIP/GREM1/LRG1/APLN	10
GO:0030851	granulocyte differentiation	3/261	34/18866	0.0114158	0.0525941	0.0353059	CEACAM1/CSF3/TRIB1	3
GO:0035633	maintenance of blood-brain barrier	3/261	34/18866	0.0114158	0.0525941	0.0353059	SLC12A2/IL6/CLDN1	3
GO:0090504	epiboly	3/261	34/18866	0.0114158	0.0525941	0.0353059	CD44/CEACAM1/PHLDB2	3
GO:2000352	negative regulation of endothelial cell apoptotic process	3/261	34/18866	0.0114158	0.0525941	0.0353059	ICAM1/TNFAIP3/KDR	3
GO:0002730	regulation of dendritic cell cytokine production	2/261	12/18866	0.0114839	0.0525941	0.0353059	JAK3/DDX58	2
GO:0002923	regulation of humoral immune response mediated by circulating immunoglobulin	2/261	12/18866	0.0114839	0.0525941	0.0353059	LTA/TNF	2
GO:0010755	regulation of plasminogen activation	2/261	12/18866	0.0114839	0.0525941	0.0353059	SERPINE2/THBS1	2
GO:0031581	hemidesmosome assembly	2/261	12/18866	0.0114839	0.0525941	0.0353059	LAMC2/LAMB3	2
GO:0032494	response to peptidoglycan	2/261	12/18866	0.0114839	0.0525941	0.0353059	RIPK2/IL6	2
GO:0032621	interleukin-18 production	2/261	12/18866	0.0114839	0.0525941	0.0353059	TLR2/GBP5	2
GO:0032905	transforming growth factor beta1 production	2/261	12/18866	0.0114839	0.0525941	0.0353059	CX3CL1/THBS1	2
GO:0036005	response to macrophage colony-stimulating factor	2/261	12/18866	0.0114839	0.0525941	0.0353059	TLR2/CSF1	2
GO:0036006	cellular response to macrophage colony-stimulating factor stimulus	2/261	12/18866	0.0114839	0.0525941	0.0353059	TLR2/CSF1	2
GO:0042416	dopamine biosynthetic process	2/261	12/18866	0.0114839	0.0525941	0.0353059	GCH1/NR4A2	2
GO:0051798	positive regulation of hair follicle development	2/261	12/18866	0.0114839	0.0525941	0.0353059	FST/TNF	2
GO:0060394	negative regulation of pathway-restricted SMAD protein phosphorylation	2/261	12/18866	0.0114839	0.0525941	0.0353059	SMAD6/GREM1	2
GO:0061517	macrophage proliferation	2/261	12/18866	0.0114839	0.0525941	0.0353059	CX3CL1/CSF1	2
GO:0070243	regulation of thymocyte apoptotic process	2/261	12/18866	0.0114839	0.0525941	0.0353059	JAK3/ADAM8	2
GO:0071639	positive regulation of monocyte chemotactic protein-1 production	2/261	12/18866	0.0114839	0.0525941	0.0353059	IL1B/LGALS9	2
GO:0072540	T-helper 17 cell lineage commitment	2/261	12/18866	0.0114839	0.0525941	0.0353059	IL23A/IL6	2
GO:0090085	regulation of protein deubiquitination	2/261	12/18866	0.0114839	0.0525941	0.0353059	TNIP1/ZC3H12A	2
GO:1904181	positive regulation of membrane depolarization	2/261	12/18866	0.0114839	0.0525941	0.0353059	P2RX7/KDR	2
GO:2001214	positive regulation of vasculogenesis	2/261	12/18866	0.0114839	0.0525941	0.0353059	CEACAM1/KDR	2
GO:0030316	osteoclast differentiation	5/261	98/18866	0.0116771	0.0533633	0.0358222	CA2/IL23A/JUNB/CSF1/TNF	5
GO:0045833	negative regulation of lipid metabolic process	5/261	98/18866	0.0116771	0.0533633	0.0358222	CEACAM1/NFKB1/IL1B/INSIG1/TNF	5
GO:0007178	transmembrane receptor protein serine/threonine kinase signaling pathway	11/261	359/18866	0.0116861	0.0533633	0.0358222	INHBA/ID1/GDF15/FST/THBS1/SMAD6/DAB2/MSX1/GREM1/ATOH8/LRG1	11
GO:0060135	maternal process involved in female pregnancy	4/261	64/18866	0.0118878	0.0542318	0.0364052	ANGPT2/STC2/LGALS9/JUNB	4
GO:1903038	negative regulation of leukocyte cell-cell adhesion	6/261	137/18866	0.0120874	0.0550885	0.0369803	CEACAM1/JAK3/IRF1/TNFRSF21/ZC3H12A/LGALS9	6
GO:0019722	calcium-mediated signaling	8/261	222/18866	0.0123488	0.0560062	0.0375963	SELE/P2RX7/CCL20/GBP1/KDR/VCAM1/CXCL8/TNF	8
GO:0033687	osteoblast proliferation	3/261	35/18866	0.0123606	0.0560062	0.0375963	NPR3/GREM1/JUNB	3
GO:0036314	response to sterol	3/261	35/18866	0.0123606	0.0560062	0.0375963	HMGCS1/INHBA/INSIG1	3
GO:0039694	viral RNA genome replication	3/261	35/18866	0.0123606	0.0560062	0.0375963	HMGA2/CXCL8/APOBEC3G	3
GO:0048333	mesodermal cell differentiation	3/261	35/18866	0.0123606	0.0560062	0.0375963	INHBA/HMGA2/ITGA2	3
GO:1900077	negative regulation of cellular response to insulin stimulus	3/261	35/18866	0.0123606	0.0560062	0.0375963	IL1B/PID1/IRS1	3
GO:0046330	positive regulation of JNK cascade	6/261	138/18866	0.012495	0.0565602	0.0379682	TRAF1/SEMA3A/RIPK2/IL1B/ERN1/TNF	6
GO:0002702	positive regulation of production of molecular mediator of immune response	5/261	100/18866	0.012663	0.057265	0.0384414	DDX58/IL1B/IL6/GPRC5B/HLA-F	5
GO:0008361	regulation of cell size	7/261	181/18866	0.0131725	0.0573999	0.0385319	SLC12A2/SEMA3A/SEMA3C/P2RX7/SEMA6C/SEMA3D/IL7R	7
GO:0010950	positive regulation of endopeptidase activity	7/261	181/18866	0.0131725	0.0573999	0.0385319	RIPK2/TNFSF10/BCL2L11/NKX3-1/LGALS9/TNF/LYN	7
GO:0010522	regulation of calcium ion transport into cytosol	5/261	101/18866	0.0131764	0.0573999	0.0385319	CX3CL1/P2RX7/CXCL10/CXCL11/LYN	5
GO:0032715	negative regulation of interleukin-6 production	4/261	66/18866	0.0132002	0.0573999	0.0385319	CX3CL1/TNFAIP3/ZC3H12A/TNF	4
GO:0150116	regulation of cell-substrate junction organization	4/261	66/18866	0.0132002	0.0573999	0.0385319	KDR/THBS1/PHLDB2/GREM1	4
GO:0009308	amine metabolic process	6/261	140/18866	0.013339	0.0573999	0.0385319	SMOX/ODC1/SAT1/NR4A2/VCAM1/MAOA	6
GO:0002701	negative regulation of production of molecular mediator of immune response	3/261	36/18866	0.013349	0.0573999	0.0385319	JAK3/HLA-F/TNF	3
GO:0043368	positive T cell selection	3/261	36/18866	0.013349	0.0573999	0.0385319	CYLD/IL23A/IL6	3
GO:0071634	regulation of transforming growth factor beta production	3/261	36/18866	0.013349	0.0573999	0.0385319	CX3CL1/THBS1/LGALS9	3
GO:0002371	dendritic cell cytokine production	2/261	13/18866	0.013449	0.0573999	0.0385319	JAK3/DDX58	2
GO:0007171	activation of transmembrane receptor protein tyrosine kinase activity	2/261	13/18866	0.013449	0.0573999	0.0385319	PDGFC/GREM1	2
GO:0008228	opsonization	2/261	13/18866	0.013449	0.0573999	0.0385319	PTX3/CD47	2
GO:0019336	phenol-containing compound catabolic process	2/261	13/18866	0.013449	0.0573999	0.0385319	MAOA/DIO2	2
GO:0031665	negative regulation of lipopolysaccharide-mediated signaling pathway	2/261	13/18866	0.013449	0.0573999	0.0385319	TNFAIP3/TRIB1	2
GO:0034144	negative regulation of toll-like receptor 4 signaling pathway	2/261	13/18866	0.013449	0.0573999	0.0385319	TNFAIP3/LYN	2
GO:0042635	positive regulation of hair cycle	2/261	13/18866	0.013449	0.0573999	0.0385319	FST/TNF	2
GO:0045602	negative regulation of endothelial cell differentiation	2/261	13/18866	0.013449	0.0573999	0.0385319	JAG1/ID1	2
GO:0060100	positive regulation of phagocytosis, engulfment	2/261	13/18866	0.013449	0.0573999	0.0385319	C3/ITGA2	2
GO:0072683	T cell extravasation	2/261	13/18866	0.013449	0.0573999	0.0385319	ICAM1/CCL2	2
GO:1900103	positive regulation of endoplasmic reticulum unfolded protein response	2/261	13/18866	0.013449	0.0573999	0.0385319	BCL2L11/ERN1	2
GO:1903977	positive regulation of glial cell migration	2/261	13/18866	0.013449	0.0573999	0.0385319	CX3CL1/CSF1	2
GO:1905155	positive regulation of membrane invagination	2/261	13/18866	0.013449	0.0573999	0.0385319	C3/ITGA2	2
GO:2000052	positive regulation of non-canonical Wnt signaling pathway	2/261	13/18866	0.013449	0.0573999	0.0385319	PLEKHA4/DAB2	2
GO:2000121	regulation of removal of superoxide radicals	2/261	13/18866	0.013449	0.0573999	0.0385319	GCH1/TNF	2
GO:0060840	artery development	5/261	102/18866	0.0137038	0.0573999	0.0385319	ADAMTS6/JAG1/LDLR/SMAD6/NKX3-1	5
GO:0001306	age-dependent response to oxidative stress	1/261	1/18866	0.0138344	0.0573999	0.0385319	SOD2	1
GO:0001315	age-dependent response to reactive oxygen species	1/261	1/18866	0.0138344	0.0573999	0.0385319	SOD2	1
GO:0002380	immunoglobulin secretion involved in immune response	1/261	1/18866	0.0138344	0.0573999	0.0385319	POU2F2	1
GO:0003068	regulation of systemic arterial blood pressure by acetylcholine	1/261	1/18866	0.0138344	0.0573999	0.0385319	SOD2	1
GO:0003069	acetylcholine-mediated vasodilation involved in regulation of systemic arterial blood pressure	1/261	1/18866	0.0138344	0.0573999	0.0385319	SOD2	1
GO:0003070	regulation of systemic arterial blood pressure by neurotransmitter	1/261	1/18866	0.0138344	0.0573999	0.0385319	SOD2	1
GO:0003131	mesodermal-endodermal cell signaling	1/261	1/18866	0.0138344	0.0573999	0.0385319	HMGA2	1
GO:0003142	cardiogenic plate morphogenesis	1/261	1/18866	0.0138344	0.0573999	0.0385319	SOX17	1
GO:0007571	age-dependent general metabolic decline	1/261	1/18866	0.0138344	0.0573999	0.0385319	SOD2	1
GO:0009645	response to low light intensity stimulus	1/261	1/18866	0.0138344	0.0573999	0.0385319	HMGCS1	1
GO:0010477	response to sulfur dioxide	1/261	1/18866	0.0138344	0.0573999	0.0385319	ICAM1	1
GO:0014861	regulation of skeletal muscle contraction via regulation of action potential	1/261	1/18866	0.0138344	0.0573999	0.0385319	KCNJ2	1
GO:0033343	positive regulation of collagen binding	1/261	1/18866	0.0138344	0.0573999	0.0385319	ITGA2	1
GO:0034147	regulation of toll-like receptor 5 signaling pathway	1/261	1/18866	0.0138344	0.0573999	0.0385319	TNFAIP3	1
GO:0034148	negative regulation of toll-like receptor 5 signaling pathway	1/261	1/18866	0.0138344	0.0573999	0.0385319	TNFAIP3	1
GO:0034263	positive regulation of autophagy in response to ER overload	1/261	1/18866	0.0138344	0.0573999	0.0385319	BCL2L11	1
GO:0035504	regulation of myosin light chain kinase activity	1/261	1/18866	0.0138344	0.0573999	0.0385319	IL1B	1
GO:0035505	positive regulation of myosin light chain kinase activity	1/261	1/18866	0.0138344	0.0573999	0.0385319	IL1B	1
GO:0035780	CD80 biosynthetic process	1/261	1/18866	0.0138344	0.0573999	0.0385319	TMEM106A	1
GO:0035935	androgen secretion	1/261	1/18866	0.0138344	0.0573999	0.0385319	NKX3-1	1
GO:0035998	7,8-dihydroneopterin 3'-triphosphate biosynthetic process	1/261	1/18866	0.0138344	0.0573999	0.0385319	GCH1	1
GO:0036164	cell-abiotic substrate adhesion	1/261	1/18866	0.0138344	0.0573999	0.0385319	ID1	1
GO:0036290	protein trans-autophosphorylation	1/261	1/18866	0.0138344	0.0573999	0.0385319	ERN1	1
GO:0042628	mating plug formation	1/261	1/18866	0.0138344	0.0573999	0.0385319	SERPINE2	1
GO:0043322	negative regulation of natural killer cell degranulation	1/261	1/18866	0.0138344	0.0573999	0.0385319	HLA-F	1
GO:0044328	canonical Wnt signaling pathway involved in positive regulation of endothelial cell migration	1/261	1/18866	0.0138344	0.0573999	0.0385319	PLPP3	1
GO:0044329	canonical Wnt signaling pathway involved in positive regulation of cell-cell adhesion	1/261	1/18866	0.0138344	0.0573999	0.0385319	PLPP3	1
GO:0044330	canonical Wnt signaling pathway involved in positive regulation of wound healing	1/261	1/18866	0.0138344	0.0573999	0.0385319	PLPP3	1
GO:0045219	regulation of FasL production	1/261	1/18866	0.0138344	0.0573999	0.0385319	JAK3	1
GO:0045221	negative regulation of FasL production	1/261	1/18866	0.0138344	0.0573999	0.0385319	JAK3	1
GO:0045795	positive regulation of cell volume	1/261	1/18866	0.0138344	0.0573999	0.0385319	SLC12A2	1
GO:0046690	response to tellurium ion	1/261	1/18866	0.0138344	0.0573999	0.0385319	HMGCS1	1
GO:0050928	negative regulation of positive chemotaxis	1/261	1/18866	0.0138344	0.0573999	0.0385319	ANGPT2	1
GO:0051041	positive regulation of calcium-independent cell-cell adhesion	1/261	1/18866	0.0138344	0.0573999	0.0385319	CX3CL1	1
GO:0060611	mammary gland fat development	1/261	1/18866	0.0138344	0.0573999	0.0385319	CSF1	1
GO:0060668	regulation of branching involved in salivary gland morphogenesis by extracellular matrix-epithelial cell signaling	1/261	1/18866	0.0138344	0.0573999	0.0385319	NTN4	1
GO:0060796	regulation of transcription involved in primary germ layer cell fate commitment	1/261	1/18866	0.0138344	0.0573999	0.0385319	SOX17	1
GO:0060807	regulation of transcription from RNA polymerase II promoter involved in definitive endodermal cell fate specification	1/261	1/18866	0.0138344	0.0573999	0.0385319	SOX17	1
GO:0061048	negative regulation of branching involved in lung morphogenesis	1/261	1/18866	0.0138344	0.0573999	0.0385319	TNF	1
GO:0061108	seminal vesicle epithelium development	1/261	1/18866	0.0138344	0.0573999	0.0385319	SERPINE2	1
GO:0061444	endocardial cushion cell development	1/261	1/18866	0.0138344	0.0573999	0.0385319	JAG1	1
GO:0061772	xenobiotic transport across blood-nerve barrier	1/261	1/18866	0.0138344	0.0573999	0.0385319	CLDN1	1
GO:0070054	mRNA splicing, via endonucleolytic cleavage and ligation	1/261	1/18866	0.0138344	0.0573999	0.0385319	ERN1	1
GO:0070238	activated T cell autonomous cell death	1/261	1/18866	0.0138344	0.0573999	0.0385319	LGALS9	1
GO:0070239	regulation of activated T cell autonomous cell death	1/261	1/18866	0.0138344	0.0573999	0.0385319	LGALS9	1
GO:0070241	positive regulation of activated T cell autonomous cell death	1/261	1/18866	0.0138344	0.0573999	0.0385319	LGALS9	1
GO:0070429	negative regulation of nucleotide-binding oligomerization domain containing 1 signaling pathway	1/261	1/18866	0.0138344	0.0573999	0.0385319	TNFAIP3	1
GO:0072680	extracellular matrix-dependent thymocyte migration	1/261	1/18866	0.0138344	0.0573999	0.0385319	ADAM8	1
GO:0072681	fibronectin-dependent thymocyte migration	1/261	1/18866	0.0138344	0.0573999	0.0385319	ADAM8	1
GO:0085032	modulation by symbiont of host I-kappaB kinase/NF-kappaB cascade	1/261	1/18866	0.0138344	0.0573999	0.0385319	TNIP1	1
GO:0097380	dorsal spinal cord interneuron anterior axon guidance	1/261	1/18866	0.0138344	0.0573999	0.0385319	LHX9	1
GO:1901303	negative regulation of cargo loading into COPII-coated vesicle	1/261	1/18866	0.0138344	0.0573999	0.0385319	INSIG1	1
GO:1902204	positive regulation of hepatocyte growth factor receptor signaling pathway	1/261	1/18866	0.0138344	0.0573999	0.0385319	ESM1	1
GO:1902228	positive regulation of macrophage colony-stimulating factor signaling pathway	1/261	1/18866	0.0138344	0.0573999	0.0385319	CSF1	1
GO:1903045	neural crest cell migration involved in sympathetic nervous system development	1/261	1/18866	0.0138344	0.0573999	0.0385319	SEMA3A	1
GO:1903544	response to butyrate	1/261	1/18866	0.0138344	0.0573999	0.0385319	CLDN1	1
GO:1903545	cellular response to butyrate	1/261	1/18866	0.0138344	0.0573999	0.0385319	CLDN1	1
GO:1905377	response to D-galactose	1/261	1/18866	0.0138344	0.0573999	0.0385319	NAMPT	1
GO:1905878	invadopodium disassembly	1/261	1/18866	0.0138344	0.0573999	0.0385319	NAV3	1
GO:1905927	regulation of invadopodium disassembly	1/261	1/18866	0.0138344	0.0573999	0.0385319	NAV3	1
GO:1905929	positive regulation of invadopodium disassembly	1/261	1/18866	0.0138344	0.0573999	0.0385319	NAV3	1
GO:1990579	peptidyl-serine trans-autophosphorylation	1/261	1/18866	0.0138344	0.0573999	0.0385319	ERN1	1
GO:1990678	histone H4-K16 deacetylation	1/261	1/18866	0.0138344	0.0573999	0.0385319	HDAC9	1
GO:2000413	regulation of fibronectin-dependent thymocyte migration	1/261	1/18866	0.0138344	0.0573999	0.0385319	ADAM8	1
GO:2000415	positive regulation of fibronectin-dependent thymocyte migration	1/261	1/18866	0.0138344	0.0573999	0.0385319	ADAM8	1
GO:2000685	positive regulation of cellular response to X-ray	1/261	1/18866	0.0138344	0.0573999	0.0385319	HMGA2	1
GO:2000834	regulation of androgen secretion	1/261	1/18866	0.0138344	0.0573999	0.0385319	NKX3-1	1
GO:2000836	positive regulation of androgen secretion	1/261	1/18866	0.0138344	0.0573999	0.0385319	NKX3-1	1
GO:0032890	regulation of organic acid transport	4/261	67/18866	0.0138896	0.0574758	0.0385829	SLC12A2/P2RX7/IL1B/THBS1	4
GO:0045670	regulation of osteoclast differentiation	4/261	67/18866	0.0138896	0.0574758	0.0385829	CA2/IL23A/CSF1/TNF	4
GO:0070613	regulation of protein processing	4/261	67/18866	0.0138896	0.0574758	0.0385829	BIRC3/SERPINE2/THBS1/ADAM8	4
GO:0034766	negative regulation of ion transmembrane transport	5/261	103/18866	0.0142451	0.058895	0.0395356	DYSF/THBS1/HECW2/RRAD/TCAF2	5
GO:0030212	hyaluronan metabolic process	3/261	37/18866	0.0143812	0.0593001	0.0398075	CD44/NFKB1/IL1B	3
GO:0060969	negative regulation of gene silencing	3/261	37/18866	0.0143812	0.0593001	0.0398075	IL6/ZC3H12A/TNF	3
GO:0097242	amyloid-beta clearance	3/261	37/18866	0.0143812	0.0593001	0.0398075	C3/LDLR/TNF	3
GO:0070838	divalent metal ion transport	13/261	471/18866	0.0144368	0.0594772	0.0399264	CX3CL1/P2RX7/ICAM1/CCL2/STC2/KCNJ2/DYSF/CACNA1A/RRAD/CXCL10/CXCL11/LYN/CCL5	13
GO:0031667	response to nutrient levels	13/261	473/18866	0.0149026	0.0612882	0.0411421	ICAM1/LIPG/NAMPT/HMGCS1/STC2/SGIP1/LDLR/GDF15/NUAK2/ZC3H12A/ITGA2/CXCL10/LTA	13
GO:0051346	negative regulation of hydrolase activity	13/261	473/18866	0.0149026	0.0612882	0.0411421	PLAUR/BIRC3/CD44/HDAC9/LAMP3/TFPI2/C3/SERPINE2/THBS1/TNFAIP8/TIMP4/PTX3/TNF	13
GO:0042698	ovulation cycle	4/261	69/18866	0.0153359	0.0629041	0.0422268	INHBA/ETS1/TIMP4/PTX3	4
GO:0050854	regulation of antigen receptor-mediated signaling pathway	4/261	69/18866	0.0153359	0.0629041	0.0422268	CEACAM1/CYLD/GBP1/LYN	4
GO:1903317	regulation of protein maturation	4/261	69/18866	0.0153359	0.0629041	0.0422268	BIRC3/SERPINE2/THBS1/ADAM8	4
GO:0010742	macrophage derived foam cell differentiation	3/261	38/18866	0.0154574	0.0629486	0.0422567	NFKBIA/NFKB1/CSF1	3
GO:0032689	negative regulation of interferon-gamma production	3/261	38/18866	0.0154574	0.0629486	0.0422567	INHBA/ZC3H12A/LGALS9	3
GO:0046596	regulation of viral entry into host cell	3/261	38/18866	0.0154574	0.0629486	0.0422567	TRIM22/PTX3/LGALS9	3
GO:0071604	transforming growth factor beta production	3/261	38/18866	0.0154574	0.0629486	0.0422567	CX3CL1/THBS1/LGALS9	3
GO:0090077	foam cell differentiation	3/261	38/18866	0.0154574	0.0629486	0.0422567	NFKBIA/NFKB1/CSF1	3
GO:1903523	negative regulation of blood circulation	3/261	38/18866	0.0154574	0.0629486	0.0422567	DOCK4/ZC3H12A/APLN	3
GO:0030007	cellular potassium ion homeostasis	2/261	14/18866	0.0155487	0.0629486	0.0422567	SLC12A2/KCNJ2	2
GO:0030213	hyaluronan biosynthetic process	2/261	14/18866	0.0155487	0.0629486	0.0422567	NFKB1/IL1B	2
GO:0032310	prostaglandin secretion	2/261	14/18866	0.0155487	0.0629486	0.0422567	P2RX7/IL1B	2
GO:0034616	response to laminar fluid shear stress	2/261	14/18866	0.0155487	0.0629486	0.0422567	ETS1/SMAD6	2
GO:0043922	negative regulation by host of viral transcription	2/261	14/18866	0.0155487	0.0629486	0.0422567	HMGA2/CCL5	2
GO:0044793	negative regulation by host of viral process	2/261	14/18866	0.0155487	0.0629486	0.0422567	PTX3/ZC3H12A	2
GO:0060397	growth hormone receptor signaling pathway via JAK-STAT	2/261	14/18866	0.0155487	0.0629486	0.0422567	JAK3/LYN	2
GO:1901386	negative regulation of voltage-gated calcium channel activity	2/261	14/18866	0.0155487	0.0629486	0.0422567	DYSF/RRAD	2
GO:1901841	regulation of high voltage-gated calcium channel activity	2/261	14/18866	0.0155487	0.0629486	0.0422567	DYSF/RRAD	2
GO:0033135	regulation of peptidyl-serine phosphorylation	6/261	145/18866	0.0156219	0.0631903	0.0424189	CD44/RIPK2/CSF3/IL6/CNKSR3/TNF	6
GO:0006816	calcium ion transport	12/261	426/18866	0.0159246	0.0643591	0.0432035	CX3CL1/P2RX7/ICAM1/CCL2/STC2/DYSF/CACNA1A/RRAD/CXCL10/CXCL11/LYN/CCL5	12
GO:0050771	negative regulation of axonogenesis	4/261	70/18866	0.0160933	0.0649538	0.0436028	SEMA3A/SEMA3C/SEMA6C/SEMA3D	4
GO:0009743	response to carbohydrate	8/261	233/18866	0.0160995	0.0649538	0.0436028	ICAM1/ANGPT2/NAMPT/IL1B/THBS1/ITGA2/ERN1/LYN	8
GO:0072511	divalent inorganic cation transport	13/261	478/18866	0.0161175	0.0649701	0.0436137	CX3CL1/P2RX7/ICAM1/CCL2/STC2/KCNJ2/DYSF/CACNA1A/RRAD/CXCL10/CXCL11/LYN/CCL5	13
GO:0001825	blastocyst formation	3/261	39/18866	0.0165778	0.0666532	0.0447435	SOX17/TM4SF1/JUNB	3
GO:0032691	negative regulation of interleukin-1 beta production	3/261	39/18866	0.0165778	0.0666532	0.0447435	CX3CL1/TNFAIP3/ZC3H12A	3
GO:0060416	response to growth hormone	3/261	39/18866	0.0165778	0.0666532	0.0447435	JAK3/GDF15/LYN	3
GO:0035690	cellular response to drug	4/261	71/18866	0.0168738	0.067785	0.0455033	MT2A/IL1B/HMGA2/NKX3-1	4
GO:0007229	integrin-mediated signaling pathway	5/261	108/18866	0.0171678	0.068907	0.0462565	LIMS2/CEACAM1/PLPP3/ITGA2/CD47	5
GO:0010821	regulation of mitochondrion organization	7/261	191/18866	0.0172221	0.0690658	0.0463631	PLAUR/BMF/TNFSF10/KDR/BCL2L11/PID1/ABLIM3	7
GO:0071214	cellular response to abiotic stimulus	10/261	331/18866	0.0172949	0.0692388	0.0464793	BMF/RELB/NAMPT/NFKB1/KCNJ2/IRF1/IL1B/DYSF/HMGA2/ITGA2	10
GO:0104004	cellular response to environmental stimulus	10/261	331/18866	0.0172949	0.0692388	0.0464793	BMF/RELB/NAMPT/NFKB1/KCNJ2/IRF1/IL1B/DYSF/HMGA2/ITGA2	10
GO:0016579	protein deubiquitination	9/261	283/18866	0.0173613	0.0694451	0.0466177	BIRC3/CYLD/NFKBIA/DDX58/IFIH1/TNFAIP3/TNIP1/ZC3H12A/USP54	9
GO:0002714	positive regulation of B cell mediated immunity	3/261	40/18866	0.0177426	0.069919	0.0469359	C3/LTA/TNF	3
GO:0002891	positive regulation of immunoglobulin mediated immune response	3/261	40/18866	0.0177426	0.069919	0.0469359	C3/LTA/TNF	3
GO:0032892	positive regulation of organic acid transport	3/261	40/18866	0.0177426	0.069919	0.0469359	SLC12A2/P2RX7/IL1B	3
GO:0040036	regulation of fibroblast growth factor receptor signaling pathway	3/261	40/18866	0.0177426	0.069919	0.0469359	THBS1/HHIP/APLN	3
GO:0042417	dopamine metabolic process	3/261	40/18866	0.0177426	0.069919	0.0469359	GCH1/NR4A2/MAOA	3
GO:0046636	negative regulation of alpha-beta T cell activation	3/261	40/18866	0.0177426	0.069919	0.0469359	JAK3/ZC3H12A/LGALS9	3
GO:0051281	positive regulation of release of sequestered calcium ion into cytosol	3/261	40/18866	0.0177426	0.069919	0.0469359	CX3CL1/CXCL10/CXCL11	3
GO:0030852	regulation of granulocyte differentiation	2/261	15/18866	0.0177788	0.069919	0.0469359	CEACAM1/TRIB1	2
GO:0034349	glial cell apoptotic process	2/261	15/18866	0.0177788	0.069919	0.0469359	CCL2/TNFRSF21	2
GO:0042976	activation of Janus kinase activity	2/261	15/18866	0.0177788	0.069919	0.0469359	IL23A/CCL5	2
GO:0045651	positive regulation of macrophage differentiation	2/261	15/18866	0.0177788	0.069919	0.0469359	TRIB1/CSF1	2
GO:0048070	regulation of developmental pigmentation	2/261	15/18866	0.0177788	0.069919	0.0469359	KITLG/BCL2L11	2
GO:0060099	regulation of phagocytosis, engulfment	2/261	15/18866	0.0177788	0.069919	0.0469359	C3/ITGA2	2
GO:1900119	positive regulation of execution phase of apoptosis	2/261	15/18866	0.0177788	0.069919	0.0469359	IL6/ZC3H12A	2
GO:1901550	regulation of endothelial cell development	2/261	15/18866	0.0177788	0.069919	0.0469359	IL1B/TNF	2
GO:1903140	regulation of establishment of endothelial barrier	2/261	15/18866	0.0177788	0.069919	0.0469359	IL1B/TNF	2
GO:1903960	negative regulation of anion transmembrane transport	2/261	15/18866	0.0177788	0.069919	0.0469359	THBS1/TCAF2	2
GO:1904464	regulation of matrix metallopeptidase secretion	2/261	15/18866	0.0177788	0.069919	0.0469359	SLC12A2/TLR2	2
GO:1990773	matrix metallopeptidase secretion	2/261	15/18866	0.0177788	0.069919	0.0469359	SLC12A2/TLR2	2
GO:2000095	regulation of Wnt signaling pathway, planar cell polarity pathway	2/261	15/18866	0.0177788	0.069919	0.0469359	PLEKHA4/DAB2	2
GO:0033138	positive regulation of peptidyl-serine phosphorylation	5/261	109/18866	0.0177965	0.0699298	0.0469431	CD44/RIPK2/CSF3/IL6/TNF	5
GO:0018209	peptidyl-serine modification	10/261	333/18866	0.0179551	0.0704938	0.0473217	CD44/RIPK2/CSF3/IL6/HMGA2/CNKSR3/IL24/ERN1/TNF/IKBKE	10
GO:0008643	carbohydrate transport	6/261	151/18866	0.0187023	0.0733044	0.0492084	IL1B/C3/PID1/SLC2A6/IRS1/TNF	6
GO:2001056	positive regulation of cysteine-type endopeptidase activity	6/261	151/18866	0.0187023	0.0733044	0.0492084	RIPK2/TNFSF10/BCL2L11/NKX3-1/LGALS9/TNF	6
GO:0038083	peptidyl-tyrosine autophosphorylation	3/261	41/18866	0.0189519	0.074096	0.0497399	KDR/GREM1/LYN	3
GO:0042269	regulation of natural killer cell mediated cytotoxicity	3/261	41/18866	0.0189519	0.074096	0.0497399	CEACAM1/LGALS9/HLA-F	3
GO:1902042	negative regulation of extrinsic apoptotic signaling pathway via death domain receptors	3/261	41/18866	0.0189519	0.074096	0.0497399	ICAM1/TNFAIP3/TNFSF10	3
GO:0050864	regulation of B cell activation	7/261	195/18866	0.0190646	0.0744744	0.0499938	CYLD/TNFSF13B/TNFAIP3/INHBA/IL6/TNFRSF21/LYN	7
GO:1903169	regulation of calcium ion transmembrane transport	6/261	152/18866	0.0192533	0.0751489	0.0504466	CX3CL1/DYSF/RRAD/CXCL10/CXCL11/LYN	6
GO:0021536	diencephalon development	4/261	74/18866	0.0193557	0.0754227	0.0506304	SEMA3A/ETS1/NR4A2/MSX1	4
GO:0051881	regulation of mitochondrial membrane potential	4/261	74/18866	0.0193557	0.0754227	0.0506304	P2RX7/KDR/PID1/HSH2D	4
GO:0002040	sprouting angiogenesis	7/261	196/18866	0.0195459	0.0761005	0.0510855	E2F2/HDAC9/CEACAM1/KDR/THBS1/ESM1/GREM1	7
GO:0002295	T-helper cell lineage commitment	2/261	16/18866	0.0201354	0.0778124	0.0522346	IL23A/IL6	2
GO:0007567	parturition	2/261	16/18866	0.0201354	0.0778124	0.0522346	PLA2G4C/MAFF	2
GO:0032354	response to follicle-stimulating hormone	2/261	16/18866	0.0201354	0.0778124	0.0522346	HMGCS1/INHBA	2
GO:0033033	negative regulation of myeloid cell apoptotic process	2/261	16/18866	0.0201354	0.0778124	0.0522346	KITLG/CCL5	2
GO:0042994	cytoplasmic sequestering of transcription factor	2/261	16/18866	0.0201354	0.0778124	0.0522346	NFKBIA/NFKBIE	2
GO:0045869	negative regulation of single stranded viral RNA replication via double stranded DNA intermediate	2/261	16/18866	0.0201354	0.0778124	0.0522346	HMGA2/APOBEC3G	2
GO:0046325	negative regulation of glucose import	2/261	16/18866	0.0201354	0.0778124	0.0522346	PID1/TNF	2
GO:1905153	regulation of membrane invagination	2/261	16/18866	0.0201354	0.0778124	0.0522346	C3/ITGA2	2
GO:2001212	regulation of vasculogenesis	2/261	16/18866	0.0201354	0.0778124	0.0522346	CEACAM1/KDR	2
GO:0098760	response to interleukin-7	3/261	42/18866	0.0202057	0.0778912	0.0522875	JAK3/IL7R/IRS1	3
GO:0098761	cellular response to interleukin-7	3/261	42/18866	0.0202057	0.0778912	0.0522875	JAK3/IL7R/IRS1	3
GO:1904037	positive regulation of epithelial cell apoptotic process	3/261	42/18866	0.0202057	0.0778912	0.0522875	CCL2/IL6/THBS1	3
GO:0062013	positive regulation of small molecule metabolic process	6/261	154/18866	0.0203882	0.0785299	0.0527163	P2RX7/NFKB1/IL1B/PID1/IRS1/TNF	6
GO:0032963	collagen metabolic process	5/261	113/18866	0.020463	0.0786884	0.0528226	P2RX7/ID1/IL6/CTSS/ITGA2	5
GO:1903510	mucopolysaccharide metabolic process	5/261	113/18866	0.020463	0.0786884	0.0528226	CD44/B4GALT1/NFKB1/DSE/IL1B	5
GO:0043112	receptor metabolic process	7/261	198/18866	0.0205341	0.0788967	0.0529625	SELE/CEACAM1/GREM1/CXCL8/APLN/MX2/TNF	7
GO:0030509	BMP signaling pathway	6/261	155/18866	0.0209724	0.0804486	0.0540042	ID1/GDF15/FST/SMAD6/MSX1/GREM1	6
GO:0048754	branching morphogenesis of an epithelial tube	6/261	155/18866	0.0209724	0.0804486	0.0540042	KDR/HHIP/GREM1/NKX3-1/CSF1/TNF	6
GO:0051402	neuron apoptotic process	8/261	245/18866	0.0210633	0.080731	0.0541938	CX3CL1/CCL2/SOD2/TNFRSF21/ADAM8/BCL2L11/NR4A2/TNF	8
GO:0033077	T cell differentiation in thymus	4/261	76/18866	0.0211291	0.0808509	0.0542743	IL1A/IL1B/ADAM8/IL7R	4
GO:0072091	regulation of stem cell proliferation	4/261	76/18866	0.0211291	0.0808509	0.0542743	CX3CL1/KITLG/HMGA2/SOX17	4
GO:0001953	negative regulation of cell-matrix adhesion	3/261	43/18866	0.0215043	0.0819474	0.0550104	JAG1/THBS1/PHLDB2	3
GO:0002369	T cell cytokine production	3/261	43/18866	0.0215043	0.0819474	0.0550104	IL1B/IL6/HLA-F	3
GO:0046688	response to copper ion	3/261	43/18866	0.0215043	0.0819474	0.0550104	ICAM1/IL1A/MT2A	3
GO:0050856	regulation of T cell receptor signaling pathway	3/261	43/18866	0.0215043	0.0819474	0.0550104	CEACAM1/CYLD/GBP1	3
GO:2000648	positive regulation of stem cell proliferation	3/261	43/18866	0.0215043	0.0819474	0.0550104	CX3CL1/KITLG/HMGA2	3
GO:0006469	negative regulation of protein kinase activity	8/261	246/18866	0.0215208	0.0819474	0.0550104	CEACAM1/TNFAIP3/DUSP4/IL1B/PTPRB/WARS1/TRIB1/LYN	8
GO:0032413	negative regulation of ion transmembrane transporter activity	4/261	77/18866	0.022052	0.0838652	0.0562978	DYSF/HECW2/RRAD/TCAF2	4
GO:0022604	regulation of cell morphogenesis	13/261	499/18866	0.0220603	0.0838652	0.0562978	CD44/LIMS2/SEMA3A/SEMA3C/ICAM1/CCL2/GBP1/ID1/KDR/HECW2/SEMA6C/SEMA3D/LST1	13
GO:0010952	positive regulation of peptidase activity	7/261	201/18866	0.0220808	0.0838748	0.0563042	RIPK2/TNFSF10/BCL2L11/NKX3-1/LGALS9/TNF/LYN	7
GO:0003184	pulmonary valve morphogenesis	2/261	17/18866	0.0226145	0.0847999	0.0569253	JAG1/SMAD6	2
GO:0006991	response to sterol depletion	2/261	17/18866	0.0226145	0.0847999	0.0569253	INSIG1/LYN	2
GO:0010715	regulation of extracellular matrix disassembly	2/261	17/18866	0.0226145	0.0847999	0.0569253	ETS1/IL6	2
GO:0010819	regulation of T cell chemotaxis	2/261	17/18866	0.0226145	0.0847999	0.0569253	CXCL10/CCL5	2
GO:0015732	prostaglandin transport	2/261	17/18866	0.0226145	0.0847999	0.0569253	P2RX7/IL1B	2
GO:0030730	sequestering of triglyceride	2/261	17/18866	0.0226145	0.0847999	0.0569253	IL1B/TNF	2
GO:0030889	negative regulation of B cell proliferation	2/261	17/18866	0.0226145	0.0847999	0.0569253	TNFRSF21/LYN	2
GO:0032305	positive regulation of icosanoid secretion	2/261	17/18866	0.0226145	0.0847999	0.0569253	P2RX7/IL1B	2
GO:0032695	negative regulation of interleukin-12 production	2/261	17/18866	0.0226145	0.0847999	0.0569253	JAK3/THBS1	2
GO:0033631	cell-cell adhesion mediated by integrin	2/261	17/18866	0.0226145	0.0847999	0.0569253	PLPP3/CCL5	2
GO:0034384	high-density lipoprotein particle clearance	2/261	17/18866	0.0226145	0.0847999	0.0569253	LIPG/LDLR	2
GO:0045623	negative regulation of T-helper cell differentiation	2/261	17/18866	0.0226145	0.0847999	0.0569253	JAK3/ZC3H12A	2
GO:0051969	regulation of transmission of nerve impulse	2/261	17/18866	0.0226145	0.0847999	0.0569253	TYMP/ITGA2	2
GO:0071360	cellular response to exogenous dsRNA	2/261	17/18866	0.0226145	0.0847999	0.0569253	DDX58/IFIH1	2
GO:1905331	negative regulation of morphogenesis of an epithelium	2/261	17/18866	0.0226145	0.0847999	0.0569253	PHLDB2/TNF	2
GO:2001267	regulation of cysteine-type endopeptidase activity involved in apoptotic signaling pathway	2/261	17/18866	0.0226145	0.0847999	0.0569253	PLAUR/LGALS9	2
GO:0030168	platelet activation	6/261	158/18866	0.0227926	0.0853994	0.0573277	CEACAM1/SERPINE2/IL6/SAA1/C1QTNF1/LYN	6
GO:0085029	extracellular matrix assembly	3/261	44/18866	0.0228475	0.0854679	0.0573736	NTN4/PHLDB2/LAMB3	3
GO:1903053	regulation of extracellular matrix organization	3/261	44/18866	0.0228475	0.0854679	0.0573736	ETS1/IL6/PHLDB2	3
GO:0010506	regulation of autophagy	10/261	347/18866	0.023108	0.0863734	0.0579815	LAMP3/BMF/RIPK2/NAMPT/KDR/TRIM22/DRAM1/BCL2L11/ZC3H12A/ERN1	10
GO:0009636	response to toxic substance	8/261	250/18866	0.0234216	0.0874756	0.0587214	SOD2/MT2A/GCH1/TLR2/CLDN1/TNF/LYN/CCL5	8
GO:0043536	positive regulation of blood vessel endothelial cell migration	4/261	79/18866	0.0239706	0.0893834	0.0600021	HDAC9/KDR/ETS1/THBS1	4
GO:0050672	negative regulation of lymphocyte proliferation	4/261	79/18866	0.0239706	0.0893834	0.0600021	TNFRSF21/LGALS9/LST1/LYN	4
GO:0051209	release of sequestered calcium ion into cytosol	5/261	118/18866	0.0241468	0.0897283	0.0602336	CX3CL1/P2RX7/CXCL10/CXCL11/LYN	5
GO:0001974	blood vessel remodeling	3/261	45/18866	0.0242354	0.0897283	0.0602336	SEMA3C/CEACAM1/JAG1	3
GO:0002715	regulation of natural killer cell mediated immunity	3/261	45/18866	0.0242354	0.0897283	0.0602336	CEACAM1/LGALS9/HLA-F	3
GO:0006775	fat-soluble vitamin metabolic process	3/261	45/18866	0.0242354	0.0897283	0.0602336	NFKB1/IL1B/TNF	3
GO:0034105	positive regulation of tissue remodeling	3/261	45/18866	0.0242354	0.0897283	0.0602336	CA2/IL23A/ADAM8	3
GO:0035094	response to nicotine	3/261	45/18866	0.0242354	0.0897283	0.0602336	NFKB1/MSX1/TNF	3
GO:0043114	regulation of vascular permeability	3/261	45/18866	0.0242354	0.0897283	0.0602336	CEACAM1/C2CD4A/C2CD4B	3
GO:0070266	necroptotic process	3/261	45/18866	0.0242354	0.0897283	0.0602336	BIRC3/CYLD/TNF	3
GO:0070646	protein modification by small protein removal	9/261	300/18866	0.0242359	0.0897283	0.0602336	BIRC3/CYLD/NFKBIA/DDX58/IFIH1/TNFAIP3/TNIP1/ZC3H12A/USP54	9
GO:0046942	carboxylic acid transport	10/261	350/18866	0.0243388	0.090038	0.0604415	SLC7A2/SLC12A2/CEACAM1/P2RX7/SLC16A6/IL1B/THBS1/NFKBIE/SLC16A12/SLC26A2	10
GO:0051153	regulation of striated muscle cell differentiation	5/261	119/18866	0.0249314	0.0912556	0.0612589	HDAC9/GDF15/MSX1/GREM1/CXCL10	5
GO:0051283	negative regulation of sequestering of calcium ion	5/261	119/18866	0.0249314	0.0912556	0.0612589	CX3CL1/P2RX7/CXCL10/CXCL11/LYN	5
GO:0003151	outflow tract morphogenesis	4/261	80/18866	0.0249667	0.0912556	0.0612589	SEMA3C/JAG1/SMAD6/SOX17	4
GO:0032945	negative regulation of mononuclear cell proliferation	4/261	80/18866	0.0249667	0.0912556	0.0612589	TNFRSF21/LGALS9/LST1/LYN	4
GO:0007389	pattern specification process	12/261	455/18866	0.0250771	0.0912556	0.0612589	SEMA3A/SEMA3C/ZBTB16/C3/BHLHE40/FST/SMAD6/MSX1/HHIP/SOX17/GREM1/NKX3-1	12
GO:0010766	negative regulation of sodium ion transport	2/261	18/18866	0.0252124	0.0912556	0.0612589	SERPINE2/HECW2	2
GO:0032656	regulation of interleukin-13 production	2/261	18/18866	0.0252124	0.0912556	0.0612589	TNFRSF21/LGALS9	2
GO:0032740	positive regulation of interleukin-17 production	2/261	18/18866	0.0252124	0.0912556	0.0612589	IL23A/IL6	2
GO:0035994	response to muscle stretch	2/261	18/18866	0.0252124	0.0912556	0.0612589	NFKBIA/NFKB1	2
GO:0043011	myeloid dendritic cell differentiation	2/261	18/18866	0.0252124	0.0912556	0.0612589	RELB/BATF2	2
GO:0051023	regulation of immunoglobulin secretion	2/261	18/18866	0.0252124	0.0912556	0.0612589	IL6/TNF	2
GO:0051895	negative regulation of focal adhesion assembly	2/261	18/18866	0.0252124	0.0912556	0.0612589	THBS1/PHLDB2	2
GO:0071371	cellular response to gonadotropin stimulus	2/261	18/18866	0.0252124	0.0912556	0.0612589	HMGCS1/INHBA	2
GO:0071605	monocyte chemotactic protein-1 production	2/261	18/18866	0.0252124	0.0912556	0.0612589	IL1B/LGALS9	2
GO:0071637	regulation of monocyte chemotactic protein-1 production	2/261	18/18866	0.0252124	0.0912556	0.0612589	IL1B/LGALS9	2
GO:0072189	ureter development	2/261	18/18866	0.0252124	0.0912556	0.0612589	NFIA/SOX17	2
GO:0150118	negative regulation of cell-substrate junction organization	2/261	18/18866	0.0252124	0.0912556	0.0612589	THBS1/PHLDB2	2
GO:2000831	regulation of steroid hormone secretion	2/261	18/18866	0.0252124	0.0912556	0.0612589	NKX3-1/C1QTNF1	2
GO:0015849	organic acid transport	10/261	353/18866	0.0256161	0.0912556	0.0612589	SLC7A2/SLC12A2/CEACAM1/P2RX7/SLC16A6/IL1B/THBS1/NFKBIE/SLC16A12/SLC26A2	10
GO:1903522	regulation of blood circulation	9/261	303/18866	0.0256253	0.0912556	0.0612589	SEMA3A/ICAM1/DSP/KCNJ2/KCNK15/DOCK4/GCH1/ZC3H12A/APLN	9
GO:0032570	response to progesterone	3/261	46/18866	0.0256679	0.0912556	0.0612589	TLR2/THBS1/FOSL1	3
GO:0045581	negative regulation of T cell differentiation	3/261	46/18866	0.0256679	0.0912556	0.0612589	JAK3/IRF1/ZC3H12A	3
GO:0001937	negative regulation of endothelial cell proliferation	4/261	81/18866	0.0259874	0.0912556	0.0612589	CCL2/THBS1/ATOH8/TNF	4
GO:0051279	regulation of release of sequestered calcium ion into cytosol	4/261	81/18866	0.0259874	0.0912556	0.0612589	CX3CL1/CXCL10/CXCL11/LYN	4
GO:0051282	regulation of sequestering of calcium ion	5/261	121/18866	0.0265494	0.0912556	0.0612589	CX3CL1/P2RX7/CXCL10/CXCL11/LYN	5
GO:0043535	regulation of blood vessel endothelial cell migration	6/261	164/18866	0.0267458	0.0912556	0.0612589	HDAC9/ANGPT2/KDR/ETS1/THBS1/TNF	6
GO:0030072	peptide hormone secretion	8/261	257/18866	0.0270272	0.0912556	0.0612589	IL1B/IL6/IL1RN/CACNA1A/IRS1/APLN/TNF/CCL5	8
GO:0031334	positive regulation of protein-containing complex assembly	8/261	257/18866	0.0270272	0.0912556	0.0612589	NAV3/ICAM1/BMF/CSF3/WARS1/BCL2L11/GBP5/TNF	8
GO:0007157	heterophilic cell-cell adhesion via plasma membrane cell adhesion molecules	3/261	47/18866	0.027145	0.0912556	0.0612589	SELE/ICAM1/VCAM1	3
GO:0045776	negative regulation of blood pressure	3/261	47/18866	0.027145	0.0912556	0.0612589	SOD2/GCH1/APLN	3
GO:0030100	regulation of endocytosis	7/261	210/18866	0.0272017	0.0912556	0.0612589	SELE/SGIP1/C3/DAB2/ITGA2/GREM1/APLN	7
GO:0010811	positive regulation of cell-substrate adhesion	5/261	122/18866	0.0273829	0.0912556	0.0612589	CX3CL1/LIMS2/KDR/ABI3BP/CSF1	5
GO:0000294	nuclear-transcribed mRNA catabolic process, endonucleolytic cleavage-dependent decay	1/261	2/18866	0.0274782	0.0912556	0.0612589	ZC3H12A	1
GO:0001828	inner cell mass cellular morphogenesis	1/261	2/18866	0.0274782	0.0912556	0.0612589	SOX17	1
GO:0001970	positive regulation of activation of membrane attack complex	1/261	2/18866	0.0274782	0.0912556	0.0612589	C3	1
GO:0002268	follicular dendritic cell differentiation	1/261	2/18866	0.0274782	0.0912556	0.0612589	NFKB2	1
GO:0002280	monocyte activation involved in immune response	1/261	2/18866	0.0274782	0.0912556	0.0612589	DYSF	1
GO:0002298	CD4-positive, CD25-positive, alpha-beta regulatory T cell differentiation involved in immune response	1/261	2/18866	0.0274782	0.0912556	0.0612589	LGALS9	1
GO:0002384	hepatic immune response	1/261	2/18866	0.0274782	0.0912556	0.0612589	IL6	1
GO:0002537	nitric oxide production involved in inflammatory response	1/261	2/18866	0.0274782	0.0912556	0.0612589	SLC7A2	1
GO:0002728	negative regulation of natural killer cell cytokine production	1/261	2/18866	0.0274782	0.0912556	0.0612589	HLA-F	1
GO:0002731	negative regulation of dendritic cell cytokine production	1/261	2/18866	0.0274782	0.0912556	0.0612589	JAK3	1
GO:0002835	negative regulation of response to tumor cell	1/261	2/18866	0.0274782	0.0912556	0.0612589	CEACAM1	1
GO:0002838	negative regulation of immune response to tumor cell	1/261	2/18866	0.0274782	0.0912556	0.0612589	CEACAM1	1
GO:0002856	negative regulation of natural killer cell mediated immune response to tumor cell	1/261	2/18866	0.0274782	0.0912556	0.0612589	CEACAM1	1
GO:0002859	negative regulation of natural killer cell mediated cytotoxicity directed against tumor cell target	1/261	2/18866	0.0274782	0.0912556	0.0612589	CEACAM1	1
GO:0003350	pulmonary myocardium development	1/261	2/18866	0.0274782	0.0912556	0.0612589	SEMA3C	1
GO:0006436	tryptophanyl-tRNA aminoacylation	1/261	2/18866	0.0274782	0.0912556	0.0612589	WARS1	1
GO:0006649	phospholipid transfer to membrane	1/261	2/18866	0.0274782	0.0912556	0.0612589	P2RX7	1
GO:0007493	endodermal cell fate determination	1/261	2/18866	0.0274782	0.0912556	0.0612589	SOX17	1
GO:0010142	farnesyl diphosphate biosynthetic process, mevalonate pathway	1/261	2/18866	0.0274782	0.0912556	0.0612589	HMGCS1	1
GO:0031049	programmed DNA elimination	1/261	2/18866	0.0274782	0.0912556	0.0612589	HMGA2	1
GO:0031052	chromosome breakage	1/261	2/18866	0.0274782	0.0912556	0.0612589	HMGA2	1
GO:0032603	fractalkine production	1/261	2/18866	0.0274782	0.0912556	0.0612589	TNF	1
GO:0032832	regulation of CD4-positive, CD25-positive, alpha-beta regulatory T cell differentiation involved in immune response	1/261	2/18866	0.0274782	0.0912556	0.0612589	LGALS9	1
GO:0032834	positive regulation of CD4-positive, CD25-positive, alpha-beta regulatory T cell differentiation involved in immune response	1/261	2/18866	0.0274782	0.0912556	0.0612589	LGALS9	1
GO:0032917	polyamine acetylation	1/261	2/18866	0.0274782	0.0912556	0.0612589	SAT1	1
GO:0032918	spermidine acetylation	1/261	2/18866	0.0274782	0.0912556	0.0612589	SAT1	1
GO:0033026	negative regulation of mast cell apoptotic process	1/261	2/18866	0.0274782	0.0912556	0.0612589	KITLG	1
GO:0033341	regulation of collagen binding	1/261	2/18866	0.0274782	0.0912556	0.0612589	ITGA2	1
GO:0034146	toll-like receptor 5 signaling pathway	1/261	2/18866	0.0274782	0.0912556	0.0612589	TNFAIP3	1
GO:0035026	leading edge cell differentiation	1/261	2/18866	0.0274782	0.0912556	0.0612589	DAB2	1
GO:0035262	gonad morphogenesis	1/261	2/18866	0.0274782	0.0912556	0.0612589	LHX9	1
GO:0035781	CD86 biosynthetic process	1/261	2/18866	0.0274782	0.0912556	0.0612589	TMEM106A	1
GO:0035978	histone H2A-S139 phosphorylation	1/261	2/18866	0.0274782	0.0912556	0.0612589	HMGA2	1
GO:0036316	SREBP-SCAP complex retention in endoplasmic reticulum	1/261	2/18866	0.0274782	0.0912556	0.0612589	INSIG1	1
GO:0038016	insulin receptor internalization	1/261	2/18866	0.0274782	0.0912556	0.0612589	CEACAM1	1
GO:0038158	granulocyte colony-stimulating factor signaling pathway	1/261	2/18866	0.0274782	0.0912556	0.0612589	CEACAM1	1
GO:0038195	urokinase plasminogen activator signaling pathway	1/261	2/18866	0.0274782	0.0912556	0.0612589	PLAUR	1
GO:0042404	thyroid hormone catabolic process	1/261	2/18866	0.0274782	0.0912556	0.0612589	DIO2	1
GO:0042495	detection of triacyl bacterial lipopeptide	1/261	2/18866	0.0274782	0.0912556	0.0612589	TLR2	1
GO:0042496	detection of diacyl bacterial lipopeptide	1/261	2/18866	0.0274782	0.0912556	0.0612589	TLR2	1
GO:0043132	NAD transport	1/261	2/18866	0.0274782	0.0912556	0.0612589	P2RX7	1
GO:0043317	regulation of cytotoxic T cell degranulation	1/261	2/18866	0.0274782	0.0912556	0.0612589	CEACAM1	1
GO:0043318	negative regulation of cytotoxic T cell degranulation	1/261	2/18866	0.0274782	0.0912556	0.0612589	CEACAM1	1
GO:0044501	modulation of signal transduction in other organism	1/261	2/18866	0.0274782	0.0912556	0.0612589	TNIP1	1
GO:0044866	modulation by host of viral exo-alpha-sialidase activity	1/261	2/18866	0.0274782	0.0912556	0.0612589	PTX3	1
GO:0044867	modulation by host of viral catalytic activity	1/261	2/18866	0.0274782	0.0912556	0.0612589	PTX3	1
GO:0044869	negative regulation by host of viral exo-alpha-sialidase activity	1/261	2/18866	0.0274782	0.0912556	0.0612589	PTX3	1
GO:0044870	modulation by host of viral glycoprotein metabolic process	1/261	2/18866	0.0274782	0.0912556	0.0612589	PTX3	1
GO:0044871	negative regulation by host of viral glycoprotein metabolic process	1/261	2/18866	0.0274782	0.0912556	0.0612589	PTX3	1
GO:0045643	regulation of eosinophil differentiation	1/261	2/18866	0.0274782	0.0912556	0.0612589	TRIB1	1
GO:0045645	positive regulation of eosinophil differentiation	1/261	2/18866	0.0274782	0.0912556	0.0612589	TRIB1	1
GO:0045659	negative regulation of neutrophil differentiation	1/261	2/18866	0.0274782	0.0912556	0.0612589	TRIB1	1
GO:0045994	positive regulation of translational initiation by iron	1/261	2/18866	0.0274782	0.0912556	0.0612589	TNF	1
GO:0046208	spermine catabolic process	1/261	2/18866	0.0274782	0.0912556	0.0612589	SMOX	1
GO:0050902	leukocyte adhesive activation	1/261	2/18866	0.0274782	0.0912556	0.0612589	CX3CL1	1
GO:0051040	regulation of calcium-independent cell-cell adhesion	1/261	2/18866	0.0274782	0.0912556	0.0612589	CX3CL1	1
GO:0051066	dihydrobiopterin metabolic process	1/261	2/18866	0.0274782	0.0912556	0.0612589	GCH1	1
GO:0051466	positive regulation of corticotropin-releasing hormone secretion	1/261	2/18866	0.0274782	0.0912556	0.0612589	APLN	1
GO:0051866	general adaptation syndrome	1/261	2/18866	0.0274782	0.0912556	0.0612589	NR4A2	1
GO:0052027	modulation by symbiont of host signal transduction pathway	1/261	2/18866	0.0274782	0.0912556	0.0612589	TNIP1	1
GO:0052403	negative regulation by host of symbiont catalytic activity	1/261	2/18866	0.0274782	0.0912556	0.0612589	PTX3	1
GO:0060139	positive regulation of apoptotic process by virus	1/261	2/18866	0.0274782	0.0912556	0.0612589	BCL2L11	1
GO:0060279	positive regulation of ovulation	1/261	2/18866	0.0274782	0.0912556	0.0612589	INHBA	1
GO:0060400	negative regulation of growth hormone receptor signaling pathway	1/261	2/18866	0.0274782	0.0912556	0.0612589	GDF15	1
GO:0061010	gall bladder development	1/261	2/18866	0.0274782	0.0912556	0.0612589	SOX17	1
GO:0061031	endodermal digestive tract morphogenesis	1/261	2/18866	0.0274782	0.0912556	0.0612589	SOX17	1
GO:0061443	endocardial cushion cell differentiation	1/261	2/18866	0.0274782	0.0912556	0.0612589	JAG1	1
GO:0061528	aspartate secretion	1/261	2/18866	0.0274782	0.0912556	0.0612589	SLC12A2	1
GO:0070950	regulation of neutrophil mediated killing of bacterium	1/261	2/18866	0.0274782	0.0912556	0.0612589	CXCL6	1
GO:0070951	regulation of neutrophil mediated killing of gram-negative bacterium	1/261	2/18866	0.0274782	0.0912556	0.0612589	CXCL6	1
GO:0072564	blood microparticle formation	1/261	2/18866	0.0274782	0.0912556	0.0612589	TNF	1
GO:0072573	tolerance induction to lipopolysaccharide	1/261	2/18866	0.0274782	0.0912556	0.0612589	TNFAIP3	1
GO:0090076	relaxation of skeletal muscle	1/261	2/18866	0.0274782	0.0912556	0.0612589	KCNJ2	1
GO:0090088	regulation of oligopeptide transport	1/261	2/18866	0.0274782	0.0912556	0.0612589	CA2	1
GO:0090089	regulation of dipeptide transport	1/261	2/18866	0.0274782	0.0912556	0.0612589	CA2	1
GO:0090402	oncogene-induced cell senescence	1/261	2/18866	0.0274782	0.0912556	0.0612589	HMGA2	1
GO:0097377	spinal cord interneuron axon guidance	1/261	2/18866	0.0274782	0.0912556	0.0612589	LHX9	1
GO:0097378	dorsal spinal cord interneuron axon guidance	1/261	2/18866	0.0274782	0.0912556	0.0612589	LHX9	1
GO:0098658	inorganic anion import across plasma membrane	1/261	2/18866	0.0274782	0.0912556	0.0612589	SLC12A2	1
GO:0100001	regulation of skeletal muscle contraction by action potential	1/261	2/18866	0.0274782	0.0912556	0.0612589	KCNJ2	1
GO:0110091	negative regulation of hippocampal neuron apoptotic process	1/261	2/18866	0.0274782	0.0912556	0.0612589	CX3CL1	1
GO:0140039	cell-cell adhesion in response to extracellular stimulus	1/261	2/18866	0.0274782	0.0912556	0.0612589	VCAM1	1
GO:1900154	regulation of bone trabecula formation	1/261	2/18866	0.0274782	0.0912556	0.0612589	GREM1	1
GO:1900155	negative regulation of bone trabecula formation	1/261	2/18866	0.0274782	0.0912556	0.0612589	GREM1	1
GO:1901301	regulation of cargo loading into COPII-coated vesicle	1/261	2/18866	0.0274782	0.0912556	0.0612589	INSIG1	1
GO:1901647	positive regulation of synoviocyte proliferation	1/261	2/18866	0.0274782	0.0912556	0.0612589	TNF	1
GO:1901740	negative regulation of myoblast fusion	1/261	2/18866	0.0274782	0.0912556	0.0612589	CXCL10	1
GO:1902767	isoprenoid biosynthetic process via mevalonate	1/261	2/18866	0.0274782	0.0912556	0.0612589	HMGCS1	1
GO:1903016	negative regulation of exo-alpha-sialidase activity	1/261	2/18866	0.0274782	0.0912556	0.0612589	PTX3	1
GO:1903597	negative regulation of gap junction assembly	1/261	2/18866	0.0274782	0.0912556	0.0612589	IL1B	1
GO:1904022	positive regulation of G protein-coupled receptor internalization	1/261	2/18866	0.0274782	0.0912556	0.0612589	APLN	1
GO:1904170	regulation of bleb assembly	1/261	2/18866	0.0274782	0.0912556	0.0612589	P2RX7	1
GO:1904172	positive regulation of bleb assembly	1/261	2/18866	0.0274782	0.0912556	0.0612589	P2RX7	1
GO:1904448	regulation of aspartate secretion	1/261	2/18866	0.0274782	0.0912556	0.0612589	SLC12A2	1
GO:1904450	positive regulation of aspartate secretion	1/261	2/18866	0.0274782	0.0912556	0.0612589	SLC12A2	1
GO:1904466	positive regulation of matrix metallopeptidase secretion	1/261	2/18866	0.0274782	0.0912556	0.0612589	TLR2	1
GO:1904881	cellular response to hydrogen sulfide	1/261	2/18866	0.0274782	0.0912556	0.0612589	KDR	1
GO:1905450	negative regulation of Fc-gamma receptor signaling pathway involved in phagocytosis	1/261	2/18866	0.0274782	0.0912556	0.0612589	CD47	1
GO:1905863	invadopodium organization	1/261	2/18866	0.0274782	0.0912556	0.0612589	NAV3	1
GO:2000043	regulation of cardiac cell fate specification	1/261	2/18866	0.0274782	0.0912556	0.0612589	SOX17	1
GO:2000309	positive regulation of tumor necrosis factor (ligand) superfamily member 11 production	1/261	2/18866	0.0274782	0.0912556	0.0612589	ADAM8	1
GO:2000332	regulation of blood microparticle formation	1/261	2/18866	0.0274782	0.0912556	0.0612589	TNF	1
GO:2000334	positive regulation of blood microparticle formation	1/261	2/18866	0.0274782	0.0912556	0.0612589	TNF	1
GO:2000349	negative regulation of CD40 signaling pathway	1/261	2/18866	0.0274782	0.0912556	0.0612589	TNFAIP3	1
GO:2000683	regulation of cellular response to X-ray	1/261	2/18866	0.0274782	0.0912556	0.0612589	HMGA2	1
GO:2000857	positive regulation of mineralocorticoid secretion	1/261	2/18866	0.0274782	0.0912556	0.0612589	C1QTNF1	1
GO:2000860	positive regulation of aldosterone secretion	1/261	2/18866	0.0274782	0.0912556	0.0612589	C1QTNF1	1
GO:2000878	positive regulation of oligopeptide transport	1/261	2/18866	0.0274782	0.0912556	0.0612589	CA2	1
GO:2000880	positive regulation of dipeptide transport	1/261	2/18866	0.0274782	0.0912556	0.0612589	CA2	1
GO:2001055	positive regulation of mesenchymal cell apoptotic process	1/261	2/18866	0.0274782	0.0912556	0.0612589	MSX1	1
GO:2001148	regulation of dipeptide transmembrane transport	1/261	2/18866	0.0274782	0.0912556	0.0612589	CA2	1
GO:2001150	positive regulation of dipeptide transmembrane transport	1/261	2/18866	0.0274782	0.0912556	0.0612589	CA2	1
GO:1901617	organic hydroxy compound biosynthetic process	8/261	258/18866	0.027572	0.0915023	0.0614245	SQLE/NFKB1/HMGCS1/IL1B/GCH1/NR4A2/INSIG1/TNF	8
GO:0043393	regulation of protein binding	7/261	211/18866	0.0278165	0.091957	0.0617297	CYLD/RIPK2/CSF3/IFIT2/ID1/DAB2/NKX3-1	7
GO:0010744	positive regulation of macrophage derived foam cell differentiation	2/261	19/18866	0.0279253	0.091957	0.0617297	NFKB1/CSF1	2
GO:0039535	regulation of RIG-I signaling pathway	2/261	19/18866	0.0279253	0.091957	0.0617297	BIRC3/DHX58	2
GO:0043373	CD4-positive, alpha-beta T cell lineage commitment	2/261	19/18866	0.0279253	0.091957	0.0617297	IL23A/IL6	2
GO:0045780	positive regulation of bone resorption	2/261	19/18866	0.0279253	0.091957	0.0617297	CA2/ADAM8	2
GO:0046852	positive regulation of bone remodeling	2/261	19/18866	0.0279253	0.091957	0.0617297	CA2/ADAM8	2
GO:0061081	positive regulation of myeloid leukocyte cytokine production involved in immune response	2/261	19/18866	0.0279253	0.091957	0.0617297	DDX58/GPRC5B	2
GO:0090026	positive regulation of monocyte chemotaxis	2/261	19/18866	0.0279253	0.091957	0.0617297	CXCL10/CCL5	2
GO:0150079	negative regulation of neuroinflammatory response	2/261	19/18866	0.0279253	0.091957	0.0617297	CX3CL1/LDLR	2
GO:0150146	cell junction disassembly	2/261	19/18866	0.0279253	0.091957	0.0617297	CX3CL1/C3	2
GO:1903975	regulation of glial cell migration	2/261	19/18866	0.0279253	0.091957	0.0617297	CX3CL1/CSF1	2
GO:0001570	vasculogenesis	4/261	83/18866	0.0281033	0.0924777	0.0620793	CEACAM1/KDR/SOX17/JUNB	4
GO:0009409	response to cold	3/261	48/18866	0.0286666	0.0940008	0.0631017	NFKBIA/GMPR/CXCL10	3
GO:0010862	positive regulation of pathway-restricted SMAD protein phosphorylation	3/261	48/18866	0.0286666	0.0940008	0.0631017	INHBA/GDF15/DAB2	3
GO:0014911	positive regulation of smooth muscle cell migration	3/261	48/18866	0.0286666	0.0940008	0.0631017	DOCK4/ITGA2/CCL5	3
GO:0033628	regulation of cell adhesion mediated by integrin	3/261	48/18866	0.0286666	0.0940008	0.0631017	PLAU/LYN/CCL5	3
GO:1904036	negative regulation of epithelial cell apoptotic process	3/261	48/18866	0.0286666	0.0940008	0.0631017	ICAM1/TNFAIP3/KDR	3
GO:0062197	cellular response to chemical stress	10/261	360/18866	0.0287829	0.0943161	0.0633134	RELB/SOD2/TNFAIP3/GCH1/ETS1/DYSF/IL6/NR4A2/ZC3H12A/TNF	10
GO:0001503	ossification	11/261	412/18866	0.0288942	0.0946143	0.0635135	P2RX7/JAG1/ZBTB16/ID1/IL6/SMAD6/SLC26A2/GREM1/JUNB/CSF1/TNF	11
GO:0030073	insulin secretion	7/261	213/18866	0.0290744	0.0950711	0.0638202	IL1B/IL6/IL1RN/CACNA1A/IRS1/TNF/CCL5	7
GO:0090276	regulation of peptide hormone secretion	7/261	213/18866	0.0290744	0.0950711	0.0638202	IL1B/IL6/CACNA1A/IRS1/APLN/TNF/CCL5	7
GO:0051208	sequestering of calcium ion	5/261	124/18866	0.0290995	0.0950869	0.0638308	CX3CL1/P2RX7/CXCL10/CXCL11/LYN	5
GO:0030279	negative regulation of ossification	4/261	84/18866	0.0291985	0.0953438	0.0640033	ID1/SMAD6/GREM1/TNF	4
GO:0001894	tissue homeostasis	8/261	261/18866	0.0292522	0.0954524	0.0640762	SLC12A2/P2RX7/CA2/TNFAIP3/IL6/ADAM8/CLDN1/CSF1	8
GO:0071772	response to BMP	6/261	168/18866	0.0296195	0.0965164	0.0647904	ID1/GDF15/FST/SMAD6/MSX1/GREM1	6
GO:0071773	cellular response to BMP stimulus	6/261	168/18866	0.0296195	0.0965164	0.0647904	ID1/GDF15/FST/SMAD6/MSX1/GREM1	6
GO:0043523	regulation of neuron apoptotic process	7/261	214/18866	0.0297175	0.0967681	0.0649593	CX3CL1/CCL2/SOD2/ADAM8/BCL2L11/NR4A2/TNF	7
GO:0030968	endoplasmic reticulum unfolded protein response	5/261	125/18866	0.0299828	0.0975639	0.0654936	CCL2/STC2/BCL2L11/CXCL8/ERN1	5
GO:0003254	regulation of membrane depolarization	3/261	49/18866	0.0302326	0.0980359	0.0658104	P2RX7/KDR/HSH2D	3
GO:0009395	phospholipid catabolic process	3/261	49/18866	0.0302326	0.0980359	0.0658104	LIPG/PLA2G4C/LDLR	3
GO:0035196	production of miRNAs involved in gene silencing by miRNA	3/261	49/18866	0.0302326	0.0980359	0.0658104	IL6/ZC3H12A/TNF	3
GO:0045058	T cell selection	3/261	49/18866	0.0302326	0.0980359	0.0658104	CYLD/IL23A/IL6	3
GO:0071349	cellular response to interleukin-12	3/261	49/18866	0.0302326	0.0980359	0.0658104	RALA/SOD2/CD47	3
GO:0002689	negative regulation of leukocyte chemotaxis	2/261	20/18866	0.0307496	0.0990256	0.0664748	CCL2/GREM1	2
GO:0002726	positive regulation of T cell cytokine production	2/261	20/18866	0.0307496	0.0990256	0.0664748	IL1B/IL6	2
GO:0002902	regulation of B cell apoptotic process	2/261	20/18866	0.0307496	0.0990256	0.0664748	HSH2D/LYN	2
GO:0003215	cardiac right ventricle morphogenesis	2/261	20/18866	0.0307496	0.0990256	0.0664748	SEMA3C/JAG1	2
GO:0032303	regulation of icosanoid secretion	2/261	20/18866	0.0307496	0.0990256	0.0664748	P2RX7/IL1B	2
GO:0032816	positive regulation of natural killer cell activation	2/261	20/18866	0.0307496	0.0990256	0.0664748	IL23A/HLA-F	2
GO:0042474	middle ear morphogenesis	2/261	20/18866	0.0307496	0.0990256	0.0664748	MSX1/INSIG1	2
GO:0060353	regulation of cell adhesion molecule production	2/261	20/18866	0.0307496	0.0990256	0.0664748	IL1B/CXCL8	2
GO:0070932	histone H3 deacetylation	2/261	20/18866	0.0307496	0.0990256	0.0664748	HDAC9/PER1	2
GO:2000193	positive regulation of fatty acid transport	2/261	20/18866	0.0307496	0.0990256	0.0664748	P2RX7/IL1B	2
GO:0034614	cellular response to reactive oxygen species	6/261	170/18866	0.0311296	0.10018	0.0672499	SOD2/TNFAIP3/GCH1/ETS1/IL6/TNF	6
GO:0045445	myoblast differentiation	4/261	86/18866	0.0314642	0.101188	0.0679261	JAG1/GREM1/CXCL10/TNF	4
GO:0001961	positive regulation of cytokine-mediated signaling pathway	3/261	50/18866	0.0318429	0.102054	0.0685079	RIPK2/CSF1/IKBKE	3
GO:0032760	positive regulation of tumor necrosis factor production	3/261	50/18866	0.0318429	0.102054	0.0685079	RIPK2/IL23A/TLR2	3
GO:0045646	regulation of erythrocyte differentiation	3/261	50/18866	0.0318429	0.102054	0.0685079	INHBA/ETS1/LYN	3
GO:0050873	brown fat cell differentiation	3/261	50/18866	0.0318429	0.102054	0.0685079	LRG1/LAMB3/DIO2	3
GO:0097300	programmed necrotic cell death	3/261	50/18866	0.0318429	0.102054	0.0685079	BIRC3/CYLD/TNF	3
GO:0007584	response to nutrient	6/261	171/18866	0.0319031	0.102107	0.0685436	LIPG/HMGCS1/STC2/ITGA2/CXCL10/LTA	6
GO:0051302	regulation of cell division	6/261	171/18866	0.0319031	0.102107	0.0685436	IL1A/IL1B/FGF5/PDGFC/SOX17/NKX3-1	6
GO:1904705	regulation of vascular associated smooth muscle cell proliferation	4/261	87/18866	0.0326348	0.104306	0.0700198	SOD2/APLN/ERN1/TNF	4
GO:1990874	vascular associated smooth muscle cell proliferation	4/261	87/18866	0.0326348	0.104306	0.0700198	SOD2/APLN/ERN1/TNF	4
GO:0072089	stem cell proliferation	5/261	128/18866	0.0327332	0.104549	0.0701829	CX3CL1/KITLG/HMGA2/HHIP/SOX17	5
GO:0033673	negative regulation of kinase activity	8/261	268/18866	0.0334446	0.106058	0.0711953	CEACAM1/TNFAIP3/DUSP4/IL1B/PTPRB/WARS1/TRIB1/LYN	8
GO:0043277	apoptotic cell clearance	3/261	51/18866	0.0334972	0.106058	0.0711953	CCL2/C3/THBS1	3
GO:0060976	coronary vasculature development	3/261	51/18866	0.0334972	0.106058	0.0711953	ADAMTS6/SMAD6/APLN	3
GO:0002363	alpha-beta T cell lineage commitment	2/261	21/18866	0.0336817	0.106058	0.0711953	IL23A/IL6	2
GO:0003177	pulmonary valve development	2/261	21/18866	0.0336817	0.106058	0.0711953	JAG1/SMAD6	2
GO:0009713	catechol-containing compound biosynthetic process	2/261	21/18866	0.0336817	0.106058	0.0711953	GCH1/NR4A2	2
GO:0010893	positive regulation of steroid biosynthetic process	2/261	21/18866	0.0336817	0.106058	0.0711953	IL1B/TNF	2
GO:0021854	hypothalamus development	2/261	21/18866	0.0336817	0.106058	0.0711953	SEMA3A/ETS1	2
GO:0030728	ovulation	2/261	21/18866	0.0336817	0.106058	0.0711953	INHBA/TNFAIP6	2
GO:0032616	interleukin-13 production	2/261	21/18866	0.0336817	0.106058	0.0711953	TNFRSF21/LGALS9	2
GO:0036499	PERK-mediated unfolded protein response	2/261	21/18866	0.0336817	0.106058	0.0711953	CCL2/CXCL8	2
GO:0042402	cellular biogenic amine catabolic process	2/261	21/18866	0.0336817	0.106058	0.0711953	SMOX/SAT1	2
GO:0042423	catecholamine biosynthetic process	2/261	21/18866	0.0336817	0.106058	0.0711953	GCH1/NR4A2	2
GO:0043371	negative regulation of CD4-positive, alpha-beta T cell differentiation	2/261	21/18866	0.0336817	0.106058	0.0711953	JAK3/ZC3H12A	2
GO:0045717	negative regulation of fatty acid biosynthetic process	2/261	21/18866	0.0336817	0.106058	0.0711953	CEACAM1/INSIG1	2
GO:0051797	regulation of hair follicle development	2/261	21/18866	0.0336817	0.106058	0.0711953	FST/TNF	2
GO:0051957	positive regulation of amino acid transport	2/261	21/18866	0.0336817	0.106058	0.0711953	SLC12A2/P2RX7	2
GO:0071397	cellular response to cholesterol	2/261	21/18866	0.0336817	0.106058	0.0711953	HMGCS1/INHBA	2
GO:0071498	cellular response to fluid shear stress	2/261	21/18866	0.0336817	0.106058	0.0711953	CA2/TFPI2	2
GO:0140467	integrated stress response signaling	2/261	21/18866	0.0336817	0.106058	0.0711953	CCL2/CXCL8	2
GO:1903055	positive regulation of extracellular matrix organization	2/261	21/18866	0.0336817	0.106058	0.0711953	IL6/PHLDB2	2
GO:0032410	negative regulation of transporter activity	4/261	88/18866	0.0338306	0.106455	0.0714619	DYSF/HECW2/RRAD/TCAF2	4
GO:0015718	monocarboxylic acid transport	6/261	174/18866	0.0342986	0.107855	0.0724017	CEACAM1/P2RX7/SLC16A6/IL1B/THBS1/SLC16A12	6
GO:0002064	epithelial cell development	7/261	221/18866	0.0344893	0.108382	0.0727555	B4GALT1/ICAM1/JAG1/IL1B/ID1/CLDN1/TNF	7
GO:0001912	positive regulation of leukocyte mediated cytotoxicity	3/261	52/18866	0.0351955	0.110452	0.0741455	P2RX7/IL23A/HLA-F	3
GO:0060425	lung morphogenesis	3/261	52/18866	0.0351955	0.110452	0.0741455	ID1/HHIP/TNF	3
GO:0010508	positive regulation of autophagy	5/261	131/18866	0.0356362	0.111686	0.0749732	RIPK2/KDR/TRIM22/BCL2L11/ZC3H12A	5
GO:0044106	cellular amine metabolic process	5/261	131/18866	0.0356362	0.111686	0.0749732	SMOX/ODC1/SAT1/NR4A2/MAOA	5
GO:0002429	immune response-activating cell surface receptor signaling pathway	12/261	481/18866	0.0361382	0.113107	0.0759276	CEACAM1/CYLD/RIPK2/RELB/NFKB1/GBP1/NFKBIZ/TNFRSF21/ZC3H12A/CLEC4E/CD47/LYN	12
GO:0002757	immune response-activating signal transduction	12/261	481/18866	0.0361382	0.113107	0.0759276	CEACAM1/CYLD/RIPK2/RELB/NFKB1/GBP1/NFKBIZ/TNFRSF21/ZC3H12A/CLEC4E/CD47/LYN	12
GO:0030111	regulation of Wnt signaling pathway	10/261	375/18866	0.0364887	0.114128	0.0766128	CYLD/PLEKHA4/NFKB1/TNFAIP3/TLR2/DAB2/PLPP3/SOX17/GREM1/GPRC5B	10
GO:0006925	inflammatory cell apoptotic process	2/261	22/18866	0.036718	0.114462	0.0768373	IL6/CCL5	2
GO:0039531	regulation of viral-induced cytoplasmic pattern recognition receptor signaling pathway	2/261	22/18866	0.036718	0.114462	0.0768373	BIRC3/DHX58	2
GO:0060352	cell adhesion molecule production	2/261	22/18866	0.036718	0.114462	0.0768373	IL1B/CXCL8	2
GO:1901739	regulation of myoblast fusion	2/261	22/18866	0.036718	0.114462	0.0768373	GDF15/CXCL10	2
GO:1903019	negative regulation of glycoprotein metabolic process	2/261	22/18866	0.036718	0.114462	0.0768373	JAK3/PTX3	2
GO:0045744	negative regulation of G protein-coupled receptor signaling pathway	3/261	53/18866	0.0369374	0.11507	0.077245	CXCL8/APLN/CCL5	3
GO:0033273	response to vitamin	4/261	91/18866	0.0375696	0.115654	0.077637	HMGCS1/STC2/ITGA2/CXCL10	4
GO:0050851	antigen receptor-mediated signaling pathway	9/261	325/18866	0.0375784	0.115654	0.077637	CEACAM1/CYLD/RIPK2/NFKB1/GBP1/NFKBIZ/TNFRSF21/ZC3H12A/LYN	9
GO:0050769	positive regulation of neurogenesis	12/261	485/18866	0.0381059	0.115654	0.077637	CX3CL1/SEMA3A/IL1B/SERPINE2/IL6/TLR2/GPRC5B/CSF1/ROR1/LTA/TNF/LYN	12
GO:0043280	positive regulation of cysteine-type endopeptidase activity involved in apoptotic process	5/261	134/18866	0.0386934	0.115654	0.077637	TNFSF10/BCL2L11/NKX3-1/LGALS9/TNF	5
GO:0006584	catecholamine metabolic process	3/261	54/18866	0.0387229	0.115654	0.077637	GCH1/NR4A2/MAOA	3
GO:0009712	catechol-containing compound metabolic process	3/261	54/18866	0.0387229	0.115654	0.077637	GCH1/NR4A2/MAOA	3
GO:0010043	response to zinc ion	3/261	54/18866	0.0387229	0.115654	0.077637	P2RX7/CA2/MT2A	3
GO:0031050	dsRNA processing	3/261	54/18866	0.0387229	0.115654	0.077637	IL6/ZC3H12A/TNF	3
GO:0070918	production of small RNA involved in gene silencing by RNA	3/261	54/18866	0.0387229	0.115654	0.077637	IL6/ZC3H12A/TNF	3
GO:0098742	cell-cell adhesion via plasma-membrane adhesion molecules	8/261	277/18866	0.0394125	0.115654	0.077637	CX3CL1/SELE/CEACAM1/ICAM1/IL1RN/CLDN14/VCAM1/CLDN1	8
GO:0007413	axonal fasciculation	2/261	23/18866	0.0398553	0.115654	0.077637	SEMA3A/TNFRSF21	2
GO:0009310	amine catabolic process	2/261	23/18866	0.0398553	0.115654	0.077637	SMOX/SAT1	2
GO:0010866	regulation of triglyceride biosynthetic process	2/261	23/18866	0.0398553	0.115654	0.077637	C3/LDLR	2
GO:0035162	embryonic hemopoiesis	2/261	23/18866	0.0398553	0.115654	0.077637	KITLG/KDR	2
GO:0035743	CD4-positive, alpha-beta T cell cytokine production	2/261	23/18866	0.0398553	0.115654	0.077637	IL1B/IL6	2
GO:0043576	regulation of respiratory gaseous exchange	2/261	23/18866	0.0398553	0.115654	0.077637	NR4A2/APLN	2
GO:0046135	pyrimidine nucleoside catabolic process	2/261	23/18866	0.0398553	0.115654	0.077637	TYMP/APOBEC3G	2
GO:0050860	negative regulation of T cell receptor signaling pathway	2/261	23/18866	0.0398553	0.115654	0.077637	CEACAM1/GBP1	2
GO:0051220	cytoplasmic sequestering of protein	2/261	23/18866	0.0398553	0.115654	0.077637	NFKBIA/NFKBIE	2
GO:0071404	cellular response to low-density lipoprotein particle stimulus	2/261	23/18866	0.0398553	0.115654	0.077637	HMGCS1/LDLR	2
GO:0106030	neuron projection fasciculation	2/261	23/18866	0.0398553	0.115654	0.077637	SEMA3A/TNFRSF21	2
GO:2000050	regulation of non-canonical Wnt signaling pathway	2/261	23/18866	0.0398553	0.115654	0.077637	PLEKHA4/DAB2	2
GO:2000773	negative regulation of cellular senescence	2/261	23/18866	0.0398553	0.115654	0.077637	NAMPT/HMGA2	2
GO:2000810	regulation of bicellular tight junction assembly	2/261	23/18866	0.0398553	0.115654	0.077637	CLDN1/TNF	2
GO:0030510	regulation of BMP signaling pathway	4/261	93/18866	0.040189	0.115654	0.077637	FST/SMAD6/MSX1/GREM1	4
GO:0050796	regulation of insulin secretion	6/261	181/18866	0.0403314	0.115654	0.077637	IL1B/IL6/CACNA1A/IRS1/TNF/CCL5	6
GO:0001954	positive regulation of cell-matrix adhesion	3/261	55/18866	0.0405516	0.115654	0.077637	CX3CL1/KDR/CSF1	3
GO:0002931	response to ischemia	3/261	55/18866	0.0405516	0.115654	0.077637	CX3CL1/P2RX7/CSF1	3
GO:0008347	glial cell migration	3/261	55/18866	0.0405516	0.115654	0.077637	CX3CL1/CCL2/CSF1	3
GO:0042304	regulation of fatty acid biosynthetic process	3/261	55/18866	0.0405516	0.115654	0.077637	CEACAM1/IL1B/INSIG1	3
GO:0045727	positive regulation of translation	5/261	136/18866	0.0408178	0.115654	0.077637	IL6/THBS1/ITGA2/TNF/CCL5	5
GO:0001550	ovarian cumulus expansion	1/261	3/18866	0.0409338	0.115654	0.077637	PTX3	1
GO:0001798	positive regulation of type IIa hypersensitivity	1/261	3/18866	0.0409338	0.115654	0.077637	C3	1
GO:0001905	activation of membrane attack complex	1/261	3/18866	0.0409338	0.115654	0.077637	C3	1
GO:0001922	B-1 B cell homeostasis	1/261	3/18866	0.0409338	0.115654	0.077637	TNFAIP3	1
GO:0001969	regulation of activation of membrane attack complex	1/261	3/18866	0.0409338	0.115654	0.077637	C3	1
GO:0002266	follicular dendritic cell activation	1/261	3/18866	0.0409338	0.115654	0.077637	NFKB2	1
GO:0002477	antigen processing and presentation of exogenous peptide antigen via MHC class Ib	1/261	3/18866	0.0409338	0.115654	0.077637	HLA-F	1
GO:0002519	natural killer cell tolerance induction	1/261	3/18866	0.0409338	0.115654	0.077637	LGALS9	1
GO:0002581	negative regulation of antigen processing and presentation of peptide or polysaccharide antigen via MHC class II	1/261	3/18866	0.0409338	0.115654	0.077637	THBS1	1
GO:0002636	positive regulation of germinal center formation	1/261	3/18866	0.0409338	0.115654	0.077637	TNFSF13B	1
GO:0002774	Fc receptor mediated inhibitory signaling pathway	1/261	3/18866	0.0409338	0.115654	0.077637	LYN	1
GO:0002894	positive regulation of type II hypersensitivity	1/261	3/18866	0.0409338	0.115654	0.077637	C3	1
GO:0002941	synoviocyte proliferation	1/261	3/18866	0.0409338	0.115654	0.077637	TNF	1
GO:0005988	lactose metabolic process	1/261	3/18866	0.0409338	0.115654	0.077637	B4GALT1	1
GO:0005989	lactose biosynthetic process	1/261	3/18866	0.0409338	0.115654	0.077637	B4GALT1	1
GO:0006447	regulation of translational initiation by iron	1/261	3/18866	0.0409338	0.115654	0.077637	TNF	1
GO:0007352	zygotic specification of dorsal/ventral axis	1/261	3/18866	0.0409338	0.115654	0.077637	SMAD6	1
GO:0008065	establishment of blood-nerve barrier	1/261	3/18866	0.0409338	0.115654	0.077637	CLDN1	1
GO:0009447	putrescine catabolic process	1/261	3/18866	0.0409338	0.115654	0.077637	SAT1	1
GO:0010360	negative regulation of anion channel activity	1/261	3/18866	0.0409338	0.115654	0.077637	TCAF2	1
GO:0010621	negative regulation of transcription by transcription factor localization	1/261	3/18866	0.0409338	0.115654	0.077637	ID1	1
GO:0010693	negative regulation of alkaline phosphatase activity	1/261	3/18866	0.0409338	0.115654	0.077637	TNF	1
GO:0010751	negative regulation of nitric oxide mediated signal transduction	1/261	3/18866	0.0409338	0.115654	0.077637	THBS1	1
GO:0010899	regulation of phosphatidylcholine catabolic process	1/261	3/18866	0.0409338	0.115654	0.077637	LDLR	1
GO:0010956	negative regulation of calcidiol 1-monooxygenase activity	1/261	3/18866	0.0409338	0.115654	0.077637	NFKB1	1
GO:0015881	creatine transmembrane transport	1/261	3/18866	0.0409338	0.115654	0.077637	SLC16A12	1
GO:0021538	epithalamus development	1/261	3/18866	0.0409338	0.115654	0.077637	NR4A2	1
GO:0021828	gonadotrophin-releasing hormone neuronal migration to the hypothalamus	1/261	3/18866	0.0409338	0.115654	0.077637	SEMA3A	1
GO:0021856	hypothalamic tangential migration using cell-axon interactions	1/261	3/18866	0.0409338	0.115654	0.077637	SEMA3A	1
GO:0021986	habenula development	1/261	3/18866	0.0409338	0.115654	0.077637	NR4A2	1
GO:0032829	regulation of CD4-positive, CD25-positive, alpha-beta regulatory T cell differentiation	1/261	3/18866	0.0409338	0.115654	0.077637	LGALS9	1
GO:0032831	positive regulation of CD4-positive, CD25-positive, alpha-beta regulatory T cell differentiation	1/261	3/18866	0.0409338	0.115654	0.077637	LGALS9	1
GO:0033023	mast cell homeostasis	1/261	3/18866	0.0409338	0.115654	0.077637	KITLG	1
GO:0033024	mast cell apoptotic process	1/261	3/18866	0.0409338	0.115654	0.077637	KITLG	1
GO:0033025	regulation of mast cell apoptotic process	1/261	3/18866	0.0409338	0.115654	0.077637	KITLG	1
GO:0033387	putrescine biosynthetic process from ornithine	1/261	3/18866	0.0409338	0.115654	0.077637	ODC1	1
GO:0034140	negative regulation of toll-like receptor 3 signaling pathway	1/261	3/18866	0.0409338	0.115654	0.077637	TNFAIP3	1
GO:0034242	negative regulation of syncytium formation by plasma membrane fusion	1/261	3/18866	0.0409338	0.115654	0.077637	CXCL10	1
GO:0034769	basement membrane disassembly	1/261	3/18866	0.0409338	0.115654	0.077637	CTSS	1
GO:0035684	helper T cell extravasation	1/261	3/18866	0.0409338	0.115654	0.077637	CCL2	1
GO:0035880	embryonic nail plate morphogenesis	1/261	3/18866	0.0409338	0.115654	0.077637	MSX1	1
GO:0035986	senescence-associated heterochromatin focus assembly	1/261	3/18866	0.0409338	0.115654	0.077637	HMGA2	1
GO:0038098	sequestering of BMP from receptor via BMP binding	1/261	3/18866	0.0409338	0.115654	0.077637	GREM1	1
GO:0042942	D-serine transport	1/261	3/18866	0.0409338	0.115654	0.077637	NFKBIE	1
GO:0043316	cytotoxic T cell degranulation	1/261	3/18866	0.0409338	0.115654	0.077637	CEACAM1	1
GO:0043321	regulation of natural killer cell degranulation	1/261	3/18866	0.0409338	0.115654	0.077637	HLA-F	1
GO:0043323	positive regulation of natural killer cell degranulation	1/261	3/18866	0.0409338	0.115654	0.077637	HLA-F	1
GO:0043396	corticotropin-releasing hormone secretion	1/261	3/18866	0.0409338	0.115654	0.077637	APLN	1
GO:0043397	regulation of corticotropin-releasing hormone secretion	1/261	3/18866	0.0409338	0.115654	0.077637	APLN	1
GO:0044868	modulation by host of viral molecular function	1/261	3/18866	0.0409338	0.115654	0.077637	PTX3	1
GO:0045626	negative regulation of T-helper 1 cell differentiation	1/261	3/18866	0.0409338	0.115654	0.077637	JAK3	1
GO:0045658	regulation of neutrophil differentiation	1/261	3/18866	0.0409338	0.115654	0.077637	TRIB1	1
GO:0046882	negative regulation of follicle-stimulating hormone secretion	1/261	3/18866	0.0409338	0.115654	0.077637	INHBA	1
GO:0048165	fused antrum stage	1/261	3/18866	0.0409338	0.115654	0.077637	PTX3	1
GO:0052042	positive regulation by symbiont of host programmed cell death	1/261	3/18866	0.0409338	0.115654	0.077637	BCL2L11	1
GO:0052151	positive regulation by symbiont of host apoptotic process	1/261	3/18866	0.0409338	0.115654	0.077637	BCL2L11	1
GO:0052199	negative regulation of catalytic activity in other organism involved in symbiotic interaction	1/261	3/18866	0.0409338	0.115654	0.077637	PTX3	1
GO:0052330	positive regulation by organism of programmed cell death in other organism involved in symbiotic interaction	1/261	3/18866	0.0409338	0.115654	0.077637	BCL2L11	1
GO:0052422	modulation by host of symbiont catalytic activity	1/261	3/18866	0.0409338	0.115654	0.077637	PTX3	1
GO:0060183	apelin receptor signaling pathway	1/261	3/18866	0.0409338	0.115654	0.077637	APLN	1
GO:0060278	regulation of ovulation	1/261	3/18866	0.0409338	0.115654	0.077637	INHBA	1
GO:0060763	mammary duct terminal end bud growth	1/261	3/18866	0.0409338	0.115654	0.077637	CSF1	1
GO:0060912	cardiac cell fate specification	1/261	3/18866	0.0409338	0.115654	0.077637	SOX17	1
GO:0060913	cardiac cell fate determination	1/261	3/18866	0.0409338	0.115654	0.077637	SOX17	1
GO:0061107	seminal vesicle development	1/261	3/18866	0.0409338	0.115654	0.077637	SERPINE2	1
GO:0061771	response to caloric restriction	1/261	3/18866	0.0409338	0.115654	0.077637	LDLR	1
GO:0070236	negative regulation of activation-induced cell death of T cells	1/261	3/18866	0.0409338	0.115654	0.077637	TSC22D3	1
GO:0070340	detection of bacterial lipopeptide	1/261	3/18866	0.0409338	0.115654	0.077637	TLR2	1
GO:0070425	negative regulation of nucleotide-binding oligomerization domain containing signaling pathway	1/261	3/18866	0.0409338	0.115654	0.077637	TNFAIP3	1
GO:0070428	regulation of nucleotide-binding oligomerization domain containing 1 signaling pathway	1/261	3/18866	0.0409338	0.115654	0.077637	TNFAIP3	1
GO:0070433	negative regulation of nucleotide-binding oligomerization domain containing 2 signaling pathway	1/261	3/18866	0.0409338	0.115654	0.077637	TNFAIP3	1
GO:0070447	positive regulation of oligodendrocyte progenitor proliferation	1/261	3/18866	0.0409338	0.115654	0.077637	LYN	1
GO:0070634	transepithelial ammonium transport	1/261	3/18866	0.0409338	0.115654	0.077637	SLC12A2	1
GO:0070667	negative regulation of mast cell proliferation	1/261	3/18866	0.0409338	0.115654	0.077637	LYN	1
GO:0070949	regulation of neutrophil mediated killing of symbiont cell	1/261	3/18866	0.0409338	0.115654	0.077637	CXCL6	1
GO:0071691	cardiac muscle thin filament assembly	1/261	3/18866	0.0409338	0.115654	0.077637	NEBL	1
GO:0071725	response to triacyl bacterial lipopeptide	1/261	3/18866	0.0409338	0.115654	0.077637	TLR2	1
GO:0071727	cellular response to triacyl bacterial lipopeptide	1/261	3/18866	0.0409338	0.115654	0.077637	TLR2	1
GO:0071898	regulation of estrogen receptor binding	1/261	3/18866	0.0409338	0.115654	0.077637	NKX3-1	1
GO:0071899	negative regulation of estrogen receptor binding	1/261	3/18866	0.0409338	0.115654	0.077637	NKX3-1	1
GO:0072535	tumor necrosis factor (ligand) superfamily member 11 production	1/261	3/18866	0.0409338	0.115654	0.077637	ADAM8	1
GO:0090427	activation of meiosis	1/261	3/18866	0.0409338	0.115654	0.077637	MSX1	1
GO:0097343	ripoptosome assembly	1/261	3/18866	0.0409338	0.115654	0.077637	CYLD	1
GO:0097376	interneuron axon guidance	1/261	3/18866	0.0409338	0.115654	0.077637	LHX9	1
GO:0140074	cardiac endothelial to mesenchymal transition	1/261	3/18866	0.0409338	0.115654	0.077637	SEMA3C	1
GO:0150018	basal dendrite development	1/261	3/18866	0.0409338	0.115654	0.077637	SEMA3A	1
GO:0150019	basal dendrite morphogenesis	1/261	3/18866	0.0409338	0.115654	0.077637	SEMA3A	1
GO:0150020	basal dendrite arborization	1/261	3/18866	0.0409338	0.115654	0.077637	SEMA3A	1
GO:0150064	vertebrate eye-specific patterning	1/261	3/18866	0.0409338	0.115654	0.077637	C3	1
GO:1900450	negative regulation of glutamate receptor signaling pathway	1/261	3/18866	0.0409338	0.115654	0.077637	CX3CL1	1
GO:1900623	regulation of monocyte aggregation	1/261	3/18866	0.0409338	0.115654	0.077637	CD44	1
GO:1900625	positive regulation of monocyte aggregation	1/261	3/18866	0.0409338	0.115654	0.077637	CD44	1
GO:1901026	ripoptosome assembly involved in necroptotic process	1/261	3/18866	0.0409338	0.115654	0.077637	CYLD	1
GO:1901143	insulin catabolic process	1/261	3/18866	0.0409338	0.115654	0.077637	CEACAM1	1
GO:1901645	regulation of synoviocyte proliferation	1/261	3/18866	0.0409338	0.115654	0.077637	TNF	1
GO:1902226	regulation of macrophage colony-stimulating factor signaling pathway	1/261	3/18866	0.0409338	0.115654	0.077637	CSF1	1
GO:1902263	apoptotic process involved in embryonic digit morphogenesis	1/261	3/18866	0.0409338	0.115654	0.077637	BCL2L11	1
GO:1903015	regulation of exo-alpha-sialidase activity	1/261	3/18866	0.0409338	0.115654	0.077637	PTX3	1
GO:1903375	facioacoustic ganglion development	1/261	3/18866	0.0409338	0.115654	0.077637	SEMA3A	1
GO:1903385	regulation of homophilic cell adhesion	1/261	3/18866	0.0409338	0.115654	0.077637	CEACAM1	1
GO:1904694	negative regulation of vascular associated smooth muscle contraction	1/261	3/18866	0.0409338	0.115654	0.077637	DOCK4	1
GO:1904880	response to hydrogen sulfide	1/261	3/18866	0.0409338	0.115654	0.077637	KDR	1
GO:1905167	positive regulation of lysosomal protein catabolic process	1/261	3/18866	0.0409338	0.115654	0.077637	LDLR	1
GO:1905292	regulation of neural crest cell differentiation	1/261	3/18866	0.0409338	0.115654	0.077637	SEMA3C	1
GO:1905294	positive regulation of neural crest cell differentiation	1/261	3/18866	0.0409338	0.115654	0.077637	SEMA3C	1
GO:1905310	regulation of cardiac neural crest cell migration involved in outflow tract morphogenesis	1/261	3/18866	0.0409338	0.115654	0.077637	SEMA3C	1
GO:1905312	positive regulation of cardiac neural crest cell migration involved in outflow tract morphogenesis	1/261	3/18866	0.0409338	0.115654	0.077637	SEMA3C	1
GO:1905917	positive regulation of cell differentiation involved in phenotypic switching	1/261	3/18866	0.0409338	0.115654	0.077637	SOD2	1
GO:1905932	positive regulation of vascular associated smooth muscle cell differentiation involved in phenotypic switching	1/261	3/18866	0.0409338	0.115654	0.077637	SOD2	1
GO:1990108	protein linear deubiquitination	1/261	3/18866	0.0409338	0.115654	0.077637	CYLD	1
GO:1990774	tumor necrosis factor secretion	1/261	3/18866	0.0409338	0.115654	0.077637	TMEM106A	1
GO:2000097	regulation of smooth muscle cell-matrix adhesion	1/261	3/18866	0.0409338	0.115654	0.077637	PLAU	1
GO:2000307	regulation of tumor necrosis factor (ligand) superfamily member 11 production	1/261	3/18866	0.0409338	0.115654	0.077637	ADAM8	1
GO:2000412	positive regulation of thymocyte migration	1/261	3/18866	0.0409338	0.115654	0.077637	ADAM8	1
GO:2000502	negative regulation of natural killer cell chemotaxis	1/261	3/18866	0.0409338	0.115654	0.077637	CCL2	1
GO:2000627	positive regulation of miRNA catabolic process	1/261	3/18866	0.0409338	0.115654	0.077637	ZC3H12A	1
GO:2000634	regulation of primary miRNA processing	1/261	3/18866	0.0409338	0.115654	0.077637	IL6	1
GO:2000635	negative regulation of primary miRNA processing	1/261	3/18866	0.0409338	0.115654	0.077637	IL6	1
GO:2000639	negative regulation of SREBP signaling pathway	1/261	3/18866	0.0409338	0.115654	0.077637	INSIG1	1
GO:2000676	positive regulation of type B pancreatic cell apoptotic process	1/261	3/18866	0.0409338	0.115654	0.077637	IL6	1
GO:2001038	regulation of cellular response to drug	1/261	3/18866	0.0409338	0.115654	0.077637	HMGA2	1
GO:2001170	negative regulation of ATP biosynthetic process	1/261	3/18866	0.0409338	0.115654	0.077637	PID1	1
GO:2001190	positive regulation of T cell activation via T cell receptor contact with antigen bound to MHC molecule on antigen presenting cell	1/261	3/18866	0.0409338	0.115654	0.077637	LGALS9	1
GO:0051495	positive regulation of cytoskeleton organization	7/261	230/18866	0.0413381	0.116725	0.0783563	CX3CL1/NAV3/P2RX7/ICAM1/CSF3/ID1/CD47	7
GO:0060562	epithelial tube morphogenesis	9/261	331/18866	0.0414064	0.116848	0.0784385	RALA/KDR/HHIP/SOX17/GREM1/NKX3-1/CXCL10/CSF1/TNF	9
GO:0045778	positive regulation of ossification	4/261	94/18866	0.0415367	0.117145	0.0786379	P2RX7/JAG1/ZBTB16/IL6	4
GO:0001649	osteoblast differentiation	7/261	231/18866	0.0421498	0.118718	0.0796942	JAG1/ID1/IL6/SMAD6/GREM1/JUNB/TNF	7
GO:0006986	response to unfolded protein	6/261	183/18866	0.0421708	0.118718	0.0796942	CCL2/STC2/THBS1/BCL2L11/CXCL8/ERN1	6
GO:0030177	positive regulation of Wnt signaling pathway	6/261	183/18866	0.0421708	0.118718	0.0796942	PLEKHA4/NFKB1/TNFAIP3/TLR2/DAB2/GPRC5B	6
GO:0006066	alcohol metabolic process	10/261	385/18866	0.0423598	0.119142	0.0799786	SQLE/NFKB1/HMGCS1/IL1B/LDLR/GCH1/DYSF/PLPP3/INSIG1/TNF	10
GO:0002712	regulation of B cell mediated immunity	3/261	56/18866	0.0424233	0.119142	0.0799786	C3/LTA/TNF	3
GO:0002889	regulation of immunoglobulin mediated immune response	3/261	56/18866	0.0424233	0.119142	0.0799786	C3/LTA/TNF	3
GO:0060688	regulation of morphogenesis of a branching structure	3/261	56/18866	0.0424233	0.119142	0.0799786	NTN4/GREM1/TNF	3
GO:0050709	negative regulation of protein secretion	4/261	95/18866	0.0429098	0.120436	0.0808474	HDAC9/IL1B/RHBDF2/IRS1	4
GO:0002407	dendritic cell chemotaxis	2/261	24/18866	0.04309	0.12058	0.0809439	LGALS9/CCL5	2
GO:0002438	acute inflammatory response to antigenic stimulus	2/261	24/18866	0.04309	0.12058	0.0809439	ICAM1/C3	2
GO:0034143	regulation of toll-like receptor 4 signaling pathway	2/261	24/18866	0.04309	0.12058	0.0809439	TNFAIP3/LYN	2
GO:0050995	negative regulation of lipid catabolic process	2/261	24/18866	0.04309	0.12058	0.0809439	IL1B/TNF	2
GO:1902993	positive regulation of amyloid precursor protein catabolic process	2/261	24/18866	0.04309	0.12058	0.0809439	TNF/LYN	2
GO:0002090	regulation of receptor internalization	3/261	57/18866	0.0443376	0.123997	0.0832378	SELE/GREM1/APLN	3
GO:0007050	cell cycle arrest	7/261	234/18866	0.0446468	0.124787	0.0837681	INHBA/IRF1/THBS1/HMGA2/NKX3-1/CXCL8/ERN1	7
GO:0051147	regulation of muscle cell differentiation	6/261	186/18866	0.0450278	0.125777	0.0844324	HDAC9/SOD2/GDF15/MSX1/GREM1/CXCL10	6
GO:0097553	calcium ion transmembrane import into cytosol	5/261	140/18866	0.0452755	0.126393	0.0848462	CX3CL1/P2RX7/CXCL10/CXCL11/LYN	5
GO:0000302	response to reactive oxygen species	7/261	235/18866	0.0454999	0.126944	0.0852158	SOD2/TNFAIP3/GCH1/ETS1/IL6/FOSL1/TNF	7
GO:0006476	protein deacetylation	4/261	97/18866	0.0457322	0.127364	0.0854978	HDAC9/FRY/JDP2/PER1	4
GO:0030516	regulation of axon extension	4/261	97/18866	0.0457322	0.127364	0.0854978	SEMA3A/SEMA3C/SEMA6C/SEMA3D	4
GO:0042100	B cell proliferation	4/261	97/18866	0.0457322	0.127364	0.0854978	TNFSF13B/TNFRSF21/IL7R/LYN	4
GO:0051055	negative regulation of lipid biosynthetic process	3/261	58/18866	0.0462944	0.12874	0.0864216	CEACAM1/NFKB1/INSIG1	3
GO:1903793	positive regulation of anion transport	3/261	58/18866	0.0462944	0.12874	0.0864216	SLC12A2/P2RX7/IL1B	3
GO:0045662	negative regulation of myoblast differentiation	2/261	25/18866	0.046419	0.12874	0.0864216	CXCL10/TNF	2
GO:0046639	negative regulation of alpha-beta T cell differentiation	2/261	25/18866	0.046419	0.12874	0.0864216	JAK3/ZC3H12A	2
GO:0046697	decidualization	2/261	25/18866	0.046419	0.12874	0.0864216	STC2/JUNB	2
GO:1904385	cellular response to angiotensin	2/261	25/18866	0.046419	0.12874	0.0864216	CA2/NFKB1	2
GO:2001026	regulation of endothelial cell chemotaxis	2/261	25/18866	0.046419	0.12874	0.0864216	KDR/THBS1	2
GO:0060070	canonical Wnt signaling pathway	9/261	339/18866	0.0469091	0.130022	0.0872824	CYLD/PLEKHA4/NFKB1/DAB2/NR4A2/PLPP3/SOX17/GREM1/GPRC5B	9
GO:0030879	mammary gland development	5/261	142/18866	0.0476092	0.131884	0.0885324	BCL2L11/MSX1/ITGA2/APLN/CSF1	5
GO:0051289	protein homotetramerization	3/261	59/18866	0.0482933	0.1337	0.0897514	SOD2/KCNJ2/GBP5	3
GO:0035296	regulation of tube diameter	5/261	143/18866	0.0488023	0.13495	0.0905901	ICAM1/SOD2/DOCK4/GCH1/APLN	5
GO:0097746	regulation of blood vessel diameter	5/261	143/18866	0.0488023	0.13495	0.0905901	ICAM1/SOD2/DOCK4/GCH1/APLN	5
GO:0040037	negative regulation of fibroblast growth factor receptor signaling pathway	2/261	26/18866	0.049839	0.137572	0.0923507	THBS1/APLN	2
GO:0044068	modulation by symbiont of host cellular process	2/261	26/18866	0.049839	0.137572	0.0923507	TNIP1/BCL2L11	2
GO:0060384	innervation	2/261	26/18866	0.049839	0.137572	0.0923507	SEMA3A/SERPINE2	2
GO:0035150	regulation of tube size	5/261	144/18866	0.050013	0.137808	0.0925093	ICAM1/SOD2/DOCK4/GCH1/APLN	5
GO:0106106	cold-induced thermogenesis	5/261	144/18866	0.050013	0.137808	0.0925093	NPR3/G0S2/ID1/PDGFC/DIO2	5
GO:0120161	regulation of cold-induced thermogenesis	5/261	144/18866	0.050013	0.137808	0.0925093	NPR3/G0S2/ID1/PDGFC/DIO2	5
GO:0019229	regulation of vasoconstriction	3/261	60/18866	0.0503339	0.138529	0.0929932	ICAM1/DOCK4/APLN	3
GO:0061098	positive regulation of protein tyrosine kinase activity	3/261	60/18866	0.0503339	0.138529	0.0929932	GREM1/GPRC5B/CCL5	3
GO:0016525	negative regulation of angiogenesis	6/261	192/18866	0.0510968	0.140546	0.0943471	E2F2/SLC12A2/ANGPT2/THBS1/CXCL10/TNF	6
GO:0002792	negative regulation of peptide secretion	4/261	101/18866	0.0516804	0.140888	0.0945768	HDAC9/IL1B/RHBDF2/IRS1	4
GO:0019217	regulation of fatty acid metabolic process	4/261	101/18866	0.0516804	0.140888	0.0945768	CEACAM1/IL1B/IRS1/INSIG1	4
GO:0042632	cholesterol homeostasis	4/261	101/18866	0.0516804	0.140888	0.0945768	HDAC9/LIPG/LDLR/INSIG1	4
GO:0042267	natural killer cell mediated cytotoxicity	3/261	61/18866	0.0524159	0.140888	0.0945768	CEACAM1/LGALS9/HLA-F	3
GO:0042733	embryonic digit morphogenesis	3/261	61/18866	0.0524159	0.140888	0.0945768	ZBTB16/BCL2L11/MSX1	3
GO:0046324	regulation of glucose import	3/261	61/18866	0.0524159	0.140888	0.0945768	PID1/IRS1/TNF	3
GO:0046888	negative regulation of hormone secretion	3/261	61/18866	0.0524159	0.140888	0.0945768	INHBA/IL1B/IRS1	3
GO:0090303	positive regulation of wound healing	3/261	61/18866	0.0524159	0.140888	0.0945768	THBS1/PLPP3/CLDN1	3
GO:0034620	cellular response to unfolded protein	5/261	146/18866	0.0524871	0.140888	0.0945768	CCL2/STC2/BCL2L11/CXCL8/ERN1	5
GO:0019932	second-messenger-mediated signaling	11/261	456/18866	0.0531867	0.140888	0.0945768	SELE/P2RX7/CCL20/GBP1/KDR/THBS1/VCAM1/CXCL10/CXCL11/CXCL8/TNF	11
GO:2000181	negative regulation of blood vessel morphogenesis	6/261	194/18866	0.0532258	0.140888	0.0945768	E2F2/SLC12A2/ANGPT2/THBS1/CXCL10/TNF	6
GO:0055092	sterol homeostasis	4/261	102/18866	0.0532304	0.140888	0.0945768	HDAC9/LIPG/LDLR/INSIG1	4
GO:1903076	regulation of protein localization to plasma membrane	4/261	102/18866	0.0532304	0.140888	0.0945768	GBP1/DAB2/PID1/TNF	4
GO:0002021	response to dietary excess	2/261	27/18866	0.053347	0.140888	0.0945768	SGIP1/GDF15	2
GO:0003148	outflow tract septum morphogenesis	2/261	27/18866	0.053347	0.140888	0.0945768	SEMA3C/SMAD6	2
GO:0009651	response to salt stress	2/261	27/18866	0.053347	0.140888	0.0945768	CLDN1/TNF	2
GO:0031954	positive regulation of protein autophosphorylation	2/261	27/18866	0.053347	0.140888	0.0945768	PDGFC/GREM1	2
GO:0032897	negative regulation of viral transcription	2/261	27/18866	0.053347	0.140888	0.0945768	HMGA2/CCL5	2
GO:0034389	lipid droplet organization	2/261	27/18866	0.053347	0.140888	0.0945768	SQLE/PLA2G4C	2
GO:0042481	regulation of odontogenesis	2/261	27/18866	0.053347	0.140888	0.0945768	MSX1/CSF1	2
GO:0050996	positive regulation of lipid catabolic process	2/261	27/18866	0.053347	0.140888	0.0945768	IL1B/IRS1	2
GO:0060544	regulation of necroptotic process	2/261	27/18866	0.053347	0.140888	0.0945768	BIRC3/CYLD	2
GO:0062098	regulation of programmed necrotic cell death	2/261	27/18866	0.053347	0.140888	0.0945768	BIRC3/CYLD	2
GO:2000353	positive regulation of endothelial cell apoptotic process	2/261	27/18866	0.053347	0.140888	0.0945768	CCL2/THBS1	2
GO:0051146	striated muscle cell differentiation	8/261	295/18866	0.0533919	0.140888	0.0945768	HDAC9/NEBL/GDF15/DYSF/MSX1/GREM1/CXCL10/DNER	8
GO:0001794	type IIa hypersensitivity	1/261	4/18866	0.0542041	0.140888	0.0945768	C3	1
GO:0001796	regulation of type IIa hypersensitivity	1/261	4/18866	0.0542041	0.140888	0.0945768	C3	1
GO:0001878	response to yeast	1/261	4/18866	0.0542041	0.140888	0.0945768	PTX3	1
GO:0001907	killing by symbiont of host cells	1/261	4/18866	0.0542041	0.140888	0.0945768	BCL2L11	1
GO:0002374	cytokine secretion involved in immune response	1/261	4/18866	0.0542041	0.140888	0.0945768	TLR2	1
GO:0002445	type II hypersensitivity	1/261	4/18866	0.0542041	0.140888	0.0945768	C3	1
GO:0002605	negative regulation of dendritic cell antigen processing and presentation	1/261	4/18866	0.0542041	0.140888	0.0945768	THBS1	1
GO:0002892	regulation of type II hypersensitivity	1/261	4/18866	0.0542041	0.140888	0.0945768	C3	1
GO:0003257	positive regulation of transcription from RNA polymerase II promoter involved in myocardial precursor cell differentiation	1/261	4/18866	0.0542041	0.140888	0.0945768	GREM1	1
GO:0007296	vitellogenesis	1/261	4/18866	0.0542041	0.140888	0.0945768	FOSL1	1
GO:0010748	negative regulation of long-chain fatty acid import across plasma membrane	1/261	4/18866	0.0542041	0.140888	0.0945768	THBS1	1
GO:0014005	microglia development	1/261	4/18866	0.0542041	0.140888	0.0945768	TLR2	1
GO:0014054	positive regulation of gamma-aminobutyric acid secretion	1/261	4/18866	0.0542041	0.140888	0.0945768	P2RX7	1
GO:0021773	striatal medium spiny neuron differentiation	1/261	4/18866	0.0542041	0.140888	0.0945768	INHBA	1
GO:0021855	hypothalamus cell migration	1/261	4/18866	0.0542041	0.140888	0.0945768	SEMA3A	1
GO:0021886	hypothalamus gonadotrophin-releasing hormone neuron differentiation	1/261	4/18866	0.0542041	0.140888	0.0945768	SEMA3A	1
GO:0021888	hypothalamus gonadotrophin-releasing hormone neuron development	1/261	4/18866	0.0542041	0.140888	0.0945768	SEMA3A	1
GO:0031296	B cell costimulation	1/261	4/18866	0.0542041	0.140888	0.0945768	TNFSF13B	1
GO:0032289	central nervous system myelin formation	1/261	4/18866	0.0542041	0.140888	0.0945768	TLR2	1
GO:0034124	regulation of MyD88-dependent toll-like receptor signaling pathway	1/261	4/18866	0.0542041	0.140888	0.0945768	IRF1	1
GO:0035290	trunk segmentation	1/261	4/18866	0.0542041	0.140888	0.0945768	SEMA3A	1
GO:0035585	calcium-mediated signaling using extracellular calcium source	1/261	4/18866	0.0542041	0.140888	0.0945768	P2RX7	1
GO:0036484	trunk neural crest cell migration	1/261	4/18866	0.0542041	0.140888	0.0945768	SEMA3A	1
GO:0036486	ventral trunk neural crest cell migration	1/261	4/18866	0.0542041	0.140888	0.0945768	SEMA3A	1
GO:0038123	toll-like receptor TLR1:TLR2 signaling pathway	1/261	4/18866	0.0542041	0.140888	0.0945768	TLR2	1
GO:0038124	toll-like receptor TLR6:TLR2 signaling pathway	1/261	4/18866	0.0542041	0.140888	0.0945768	TLR2	1
GO:0039526	modulation by virus of host apoptotic process	1/261	4/18866	0.0542041	0.140888	0.0945768	BCL2L11	1
GO:0039534	negative regulation of MDA-5 signaling pathway	1/261	4/18866	0.0542041	0.140888	0.0945768	DHX58	1
GO:0042078	germ-line stem cell division	1/261	4/18866	0.0542041	0.140888	0.0945768	ZBTB16	1
GO:0042701	progesterone secretion	1/261	4/18866	0.0542041	0.140888	0.0945768	INHBA	1
GO:0045337	farnesyl diphosphate biosynthetic process	1/261	4/18866	0.0542041	0.140888	0.0945768	HMGCS1	1
GO:0048014	Tie signaling pathway	1/261	4/18866	0.0542041	0.140888	0.0945768	ANGPT2	1
GO:0048133	male germ-line stem cell asymmetric division	1/261	4/18866	0.0542041	0.140888	0.0945768	ZBTB16	1
GO:0048866	stem cell fate specification	1/261	4/18866	0.0542041	0.140888	0.0945768	SOX17	1
GO:0051138	positive regulation of NK T cell differentiation	1/261	4/18866	0.0542041	0.140888	0.0945768	ZBTB16	1
GO:0051142	positive regulation of NK T cell proliferation	1/261	4/18866	0.0542041	0.140888	0.0945768	IL23A	1
GO:0052203	modulation of catalytic activity in other organism involved in symbiotic interaction	1/261	4/18866	0.0542041	0.140888	0.0945768	PTX3	1
GO:0060214	endocardium formation	1/261	4/18866	0.0542041	0.140888	0.0945768	SOX17	1
GO:0061073	ciliary body morphogenesis	1/261	4/18866	0.0542041	0.140888	0.0945768	JAG1	1
GO:0070164	negative regulation of adiponectin secretion	1/261	4/18866	0.0542041	0.140888	0.0945768	IL1B	1
GO:0070235	regulation of activation-induced cell death of T cells	1/261	4/18866	0.0542041	0.140888	0.0945768	TSC22D3	1
GO:0070346	positive regulation of fat cell proliferation	1/261	4/18866	0.0542041	0.140888	0.0945768	PID1	1
GO:0071284	cellular response to lead ion	1/261	4/18866	0.0542041	0.140888	0.0945768	CLDN1	1
GO:0097167	circadian regulation of translation	1/261	4/18866	0.0542041	0.140888	0.0945768	PER1	1
GO:0097252	oligodendrocyte apoptotic process	1/261	4/18866	0.0542041	0.140888	0.0945768	TNFRSF21	1
GO:0097490	sympathetic neuron projection extension	1/261	4/18866	0.0542041	0.140888	0.0945768	SEMA3A	1
GO:0097491	sympathetic neuron projection guidance	1/261	4/18866	0.0542041	0.140888	0.0945768	SEMA3A	1
GO:0098728	germline stem cell asymmetric division	1/261	4/18866	0.0542041	0.140888	0.0945768	ZBTB16	1
GO:0099183	trans-synaptic signaling by BDNF, modulating synaptic transmission	1/261	4/18866	0.0542041	0.140888	0.0945768	PLAT	1
GO:0099191	trans-synaptic signaling by BDNF	1/261	4/18866	0.0542041	0.140888	0.0945768	PLAT	1
GO:0110088	hippocampal neuron apoptotic process	1/261	4/18866	0.0542041	0.140888	0.0945768	CX3CL1	1
GO:0110089	regulation of hippocampal neuron apoptotic process	1/261	4/18866	0.0542041	0.140888	0.0945768	CX3CL1	1
GO:0140213	negative regulation of long-chain fatty acid import into cell	1/261	4/18866	0.0542041	0.140888	0.0945768	THBS1	1
GO:0150062	complement-mediated synapse pruning	1/261	4/18866	0.0542041	0.140888	0.0945768	C3	1
GO:1900086	positive regulation of peptidyl-tyrosine autophosphorylation	1/261	4/18866	0.0542041	0.140888	0.0945768	GREM1	1
GO:1900127	positive regulation of hyaluronan biosynthetic process	1/261	4/18866	0.0542041	0.140888	0.0945768	NFKB1	1
GO:1900245	positive regulation of MDA-5 signaling pathway	1/261	4/18866	0.0542041	0.140888	0.0945768	DHX58	1
GO:1901624	negative regulation of lymphocyte chemotaxis	1/261	4/18866	0.0542041	0.140888	0.0945768	CCL2	1
GO:1901671	positive regulation of superoxide dismutase activity	1/261	4/18866	0.0542041	0.140888	0.0945768	TNF	1
GO:1902202	regulation of hepatocyte growth factor receptor signaling pathway	1/261	4/18866	0.0542041	0.140888	0.0945768	ESM1	1
GO:1903347	negative regulation of bicellular tight junction assembly	1/261	4/18866	0.0542041	0.140888	0.0945768	TNF	1
GO:1903690	negative regulation of wound healing, spreading of epidermal cells	1/261	4/18866	0.0542041	0.140888	0.0945768	PHLDB2	1
GO:1904020	regulation of G protein-coupled receptor internalization	1/261	4/18866	0.0542041	0.140888	0.0945768	APLN	1
GO:1904636	response to ionomycin	1/261	4/18866	0.0542041	0.140888	0.0945768	ZC3H12A	1
GO:1904637	cellular response to ionomycin	1/261	4/18866	0.0542041	0.140888	0.0945768	ZC3H12A	1
GO:1904833	positive regulation of removal of superoxide radicals	1/261	4/18866	0.0542041	0.140888	0.0945768	TNF	1
GO:1904999	positive regulation of leukocyte adhesion to arterial endothelial cell	1/261	4/18866	0.0542041	0.140888	0.0945768	TNF	1
GO:1990086	lens fiber cell apoptotic process	1/261	4/18866	0.0542041	0.140888	0.0945768	E2F2	1
GO:1990168	protein K33-linked deubiquitination	1/261	4/18866	0.0542041	0.140888	0.0945768	TNFAIP3	1
GO:2000330	positive regulation of T-helper 17 cell lineage commitment	1/261	4/18866	0.0542041	0.140888	0.0945768	IL23A	1
GO:2000410	regulation of thymocyte migration	1/261	4/18866	0.0542041	0.140888	0.0945768	ADAM8	1
GO:2000418	positive regulation of eosinophil migration	1/261	4/18866	0.0542041	0.140888	0.0945768	ADAM8	1
GO:2000625	regulation of miRNA catabolic process	1/261	4/18866	0.0542041	0.140888	0.0945768	ZC3H12A	1
GO:2001200	positive regulation of dendritic cell differentiation	1/261	4/18866	0.0542041	0.140888	0.0945768	LGALS9	1
GO:0051348	negative regulation of transferase activity	8/261	296/18866	0.0542509	0.140932	0.0946059	CEACAM1/TNFAIP3/DUSP4/IL1B/PTPRB/WARS1/TRIB1/LYN	8
GO:0030888	regulation of B cell proliferation	3/261	62/18866	0.054539	0.141523	0.0950028	TNFSF13B/TNFRSF21/LYN	3
GO:0032233	positive regulation of actin filament bundle assembly	3/261	62/18866	0.054539	0.141523	0.0950028	CX3CL1/ID1/CD47	3
GO:0002042	cell migration involved in sprouting angiogenesis	4/261	103/18866	0.0548056	0.142057	0.0953614	HDAC9/KDR/THBS1/GREM1	4
GO:0008630	intrinsic apoptotic signaling pathway in response to DNA damage	4/261	103/18866	0.0548056	0.142057	0.0953614	CD44/BCL2L11/TNF/IKBKE	4
GO:1903670	regulation of sprouting angiogenesis	5/261	148/18866	0.0550315	0.142564	0.0957013	E2F2/HDAC9/CEACAM1/KDR/THBS1	5
GO:0014074	response to purine-containing compound	5/261	149/18866	0.05633	0.145766	0.0978511	P2RX7/HMGCS1/IL1B/FOSL1/PER1	5
GO:0043524	negative regulation of neuron apoptotic process	5/261	149/18866	0.05633	0.145766	0.0978511	CX3CL1/CCL2/SOD2/ADAM8/NR4A2	5
GO:0002027	regulation of heart rate	4/261	104/18866	0.0564058	0.145801	0.0978744	SEMA3A/DSP/KCNJ2/GCH1	4
GO:0032231	regulation of actin filament bundle assembly	4/261	104/18866	0.0564058	0.145801	0.0978744	CX3CL1/ID1/PHLDB2/CD47	4
GO:0006694	steroid biosynthetic process	6/261	197/18866	0.0565193	0.146013	0.0980171	SQLE/NFKB1/HMGCS1/IL1B/INSIG1/TNF	6
GO:0010830	regulation of myotube differentiation	3/261	63/18866	0.0567027	0.146131	0.098096	HDAC9/GDF15/CXCL10	3
GO:0002335	mature B cell differentiation	2/261	28/18866	0.0569398	0.146131	0.098096	POU2F2/IL6	2
GO:0003180	aortic valve morphogenesis	2/261	28/18866	0.0569398	0.146131	0.098096	JAG1/SMAD6	2
GO:0006929	substrate-dependent cell migration	2/261	28/18866	0.0569398	0.146131	0.098096	ADAM8/ITGA2	2
GO:0006972	hyperosmotic response	2/261	28/18866	0.0569398	0.146131	0.098096	SLC12A2/CLDN1	2
GO:0010894	negative regulation of steroid biosynthetic process	2/261	28/18866	0.0569398	0.146131	0.098096	NFKB1/INSIG1	2
GO:0034311	diol metabolic process	2/261	28/18866	0.0569398	0.146131	0.098096	GCH1/PLPP3	2
GO:0045932	negative regulation of muscle contraction	2/261	28/18866	0.0569398	0.146131	0.098096	DOCK4/ZC3H12A	2
GO:0051883	killing of cells in other organism involved in symbiotic interaction	2/261	28/18866	0.0569398	0.146131	0.098096	CXCL6/BCL2L11	2
GO:1900101	regulation of endoplasmic reticulum unfolded protein response	2/261	28/18866	0.0569398	0.146131	0.098096	BCL2L11/ERN1	2
GO:1902932	positive regulation of alcohol biosynthetic process	2/261	28/18866	0.0569398	0.146131	0.098096	IL1B/TNF	2
GO:1990776	response to angiotensin	2/261	28/18866	0.0569398	0.146131	0.098096	CA2/NFKB1	2
GO:0035107	appendage morphogenesis	5/261	150/18866	0.0576462	0.147782	0.0992041	SEMA3C/ZBTB16/BCL2L11/MSX1/GREM1	5
GO:0035108	limb morphogenesis	5/261	150/18866	0.0576462	0.147782	0.0992041	SEMA3C/ZBTB16/BCL2L11/MSX1/GREM1	5
GO:0030301	cholesterol transport	4/261	105/18866	0.0580309	0.148605	0.0997569	NFKBIA/LIPG/NFKB1/LDLR	4
GO:0062014	negative regulation of small molecule metabolic process	4/261	105/18866	0.0580309	0.148605	0.0997569	CEACAM1/NFKB1/PID1/INSIG1	4
GO:0051926	negative regulation of calcium ion transport	3/261	64/18866	0.0589067	0.150683	0.101152	ICAM1/DYSF/RRAD	3
GO:0070265	necrotic cell death	3/261	64/18866	0.0589067	0.150683	0.101152	BIRC3/CYLD/TNF	3
GO:0051224	negative regulation of protein transport	5/261	151/18866	0.0589799	0.150787	0.101222	HDAC9/IL1B/RHBDF2/IRS1/INSIG1	5
GO:0032091	negative regulation of protein binding	4/261	106/18866	0.059681	0.152413	0.102313	IFIT2/ID1/DAB2/NKX3-1	4
GO:0034446	substrate adhesion-dependent cell spreading	4/261	106/18866	0.059681	0.152413	0.102313	LIMS2/NTN4/GBP1/LAMB3	4
GO:1901654	response to ketone	6/261	200/18866	0.059933	0.152973	0.102689	ICAM1/TLR2/THBS1/CLDN1/NKX3-1/FOSL1	6
GO:0001773	myeloid dendritic cell activation	2/261	29/18866	0.0606144	0.153705	0.103181	RELB/BATF2	2
GO:0032373	positive regulation of sterol transport	2/261	29/18866	0.0606144	0.153705	0.103181	NFKBIA/LIPG	2
GO:0032376	positive regulation of cholesterol transport	2/261	29/18866	0.0606144	0.153705	0.103181	NFKBIA/LIPG	2
GO:0033032	regulation of myeloid cell apoptotic process	2/261	29/18866	0.0606144	0.153705	0.103181	KITLG/CCL5	2
GO:0035116	embryonic hindlimb morphogenesis	2/261	29/18866	0.0606144	0.153705	0.103181	ZBTB16/MSX1	2
GO:0036336	dendritic cell migration	2/261	29/18866	0.0606144	0.153705	0.103181	LGALS9/CCL5	2
GO:0043153	entrainment of circadian clock by photoperiod	2/261	29/18866	0.0606144	0.153705	0.103181	BHLHE40/PER1	2
GO:0045577	regulation of B cell differentiation	2/261	29/18866	0.0606144	0.153705	0.103181	CYLD/INHBA	2
GO:0048873	homeostasis of number of cells within a tissue	2/261	29/18866	0.0606144	0.153705	0.103181	P2RX7/CSF1	2
GO:0055075	potassium ion homeostasis	2/261	29/18866	0.0606144	0.153705	0.103181	SLC12A2/KCNJ2	2
GO:0060441	epithelial tube branching involved in lung morphogenesis	2/261	29/18866	0.0606144	0.153705	0.103181	HHIP/TNF	2
GO:0090344	negative regulation of cell aging	2/261	29/18866	0.0606144	0.153705	0.103181	NAMPT/HMGA2	2
GO:0031640	killing of cells of other organism	3/261	65/18866	0.0611506	0.154813	0.103924	P2RX7/CXCL6/BCL2L11	3
GO:0051205	protein insertion into membrane	3/261	65/18866	0.0611506	0.154813	0.103924	BMF/RTP4/BCL2L11	3
GO:0090181	regulation of cholesterol metabolic process	3/261	65/18866	0.0611506	0.154813	0.103924	SQLE/HMGCS1/LDLR	3
GO:0035601	protein deacylation	4/261	107/18866	0.0613558	0.155249	0.104217	HDAC9/FRY/JDP2/PER1	4
GO:0071560	cellular response to transforming growth factor beta stimulus	7/261	252/18866	0.0616162	0.155823	0.104603	ID1/GDF15/THBS1/SMAD6/DAB2/CLDN1/LRG1	7
GO:0045834	positive regulation of lipid metabolic process	5/261	153/18866	0.0616999	0.155951	0.104688	IL1B/LDLR/IRS1/TNF/LYN	5
GO:0007179	transforming growth factor beta receptor signaling pathway	6/261	202/18866	0.0622758	0.157321	0.105608	ID1/GDF15/THBS1/SMAD6/DAB2/LRG1	6
GO:0006024	glycosaminoglycan biosynthetic process	4/261	108/18866	0.0630554	0.159196	0.106867	B4GALT1/NFKB1/DSE/IL1B	4
GO:0010977	negative regulation of neuron projection development	5/261	154/18866	0.0630862	0.159196	0.106867	SEMA3A/SEMA3C/ID1/SEMA6C/SEMA3D	5
GO:0002228	natural killer cell mediated immunity	3/261	66/18866	0.0634339	0.159815	0.107282	CEACAM1/LGALS9/HLA-F	3
GO:0046626	regulation of insulin receptor signaling pathway	3/261	66/18866	0.0634339	0.159815	0.107282	IL1B/PID1/IRS1	3
GO:1905207	regulation of cardiocyte differentiation	3/261	66/18866	0.0634339	0.159815	0.107282	SEMA3C/SOX17/GREM1	3
GO:0001844	protein insertion into mitochondrial membrane involved in apoptotic signaling pathway	2/261	30/18866	0.0643679	0.160866	0.107988	BMF/BCL2L11	2
GO:0006884	cell volume homeostasis	2/261	30/18866	0.0643679	0.160866	0.107988	SLC12A2/P2RX7	2
GO:0010586	miRNA metabolic process	2/261	30/18866	0.0643679	0.160866	0.107988	NFKB1/ZC3H12A	2
GO:0033688	regulation of osteoblast proliferation	2/261	30/18866	0.0643679	0.160866	0.107988	NPR3/GREM1	2
GO:0035666	TRIF-dependent toll-like receptor signaling pathway	2/261	30/18866	0.0643679	0.160866	0.107988	BIRC3/IKBKE	2
GO:0044788	modulation by host of viral process	2/261	30/18866	0.0643679	0.160866	0.107988	PTX3/ZC3H12A	2
GO:0045939	negative regulation of steroid metabolic process	2/261	30/18866	0.0643679	0.160866	0.107988	NFKB1/INSIG1	2
GO:0048265	response to pain	2/261	30/18866	0.0643679	0.160866	0.107988	GCH1/THBS1	2
GO:0060142	regulation of syncytium formation by plasma membrane fusion	2/261	30/18866	0.0643679	0.160866	0.107988	GDF15/CXCL10	2
GO:0061082	myeloid leukocyte cytokine production	2/261	30/18866	0.0643679	0.160866	0.107988	DDX58/GPRC5B	2
GO:0070723	response to cholesterol	2/261	30/18866	0.0643679	0.160866	0.107988	HMGCS1/INHBA	2
GO:0002455	humoral immune response mediated by circulating immunoglobulin	5/261	155/18866	0.06449	0.160866	0.107988	C3/C1R/C1S/LTA/TNF	5
GO:1904950	negative regulation of establishment of protein localization	5/261	155/18866	0.06449	0.160866	0.107988	HDAC9/IL1B/RHBDF2/IRS1/INSIG1	5
GO:1990845	adaptive thermogenesis	5/261	155/18866	0.06449	0.160866	0.107988	NPR3/G0S2/ID1/PDGFC/DIO2	5
GO:0018958	phenol-containing compound metabolic process	4/261	109/18866	0.0647795	0.160866	0.107988	GCH1/NR4A2/MAOA/DIO2	4
GO:0008016	regulation of heart contraction	7/261	256/18866	0.0658574	0.160866	0.107988	SEMA3A/DSP/KCNJ2/KCNK15/GCH1/ZC3H12A/APLN	7
GO:0035966	response to topologically incorrect protein	6/261	205/18866	0.0658904	0.160866	0.107988	CCL2/STC2/THBS1/BCL2L11/CXCL8/ERN1	6
GO:0006641	triglyceride metabolic process	4/261	110/18866	0.0665282	0.160866	0.107988	LIPG/C3/LDLR/INSIG1	4
GO:0010769	regulation of cell morphogenesis involved in differentiation	8/261	310/18866	0.0672102	0.160866	0.107988	LIMS2/SEMA3A/SEMA3C/GBP1/ID1/HECW2/SEMA6C/SEMA3D	8
GO:0034599	cellular response to oxidative stress	8/261	310/18866	0.0672102	0.160866	0.107988	SOD2/TNFAIP3/GCH1/ETS1/IL6/NR4A2/ZC3H12A/TNF	8
GO:0002023	reduction of food intake in response to dietary excess	1/261	5/18866	0.0672914	0.160866	0.107988	GDF15	1
GO:0002457	T cell antigen processing and presentation	1/261	5/18866	0.0672914	0.160866	0.107988	ICAM1	1
GO:0002513	tolerance induction to self antigen	1/261	5/18866	0.0672914	0.160866	0.107988	LYN	1
GO:0002580	regulation of antigen processing and presentation of peptide or polysaccharide antigen via MHC class II	1/261	5/18866	0.0672914	0.160866	0.107988	THBS1	1
GO:0002677	negative regulation of chronic inflammatory response	1/261	5/18866	0.0672914	0.160866	0.107988	TNFAIP3	1
GO:0006663	platelet activating factor biosynthetic process	1/261	5/18866	0.0672914	0.160866	0.107988	PLA2G4C	1
GO:0008215	spermine metabolic process	1/261	5/18866	0.0672914	0.160866	0.107988	SMOX	1
GO:0009446	putrescine biosynthetic process	1/261	5/18866	0.0672914	0.160866	0.107988	ODC1	1
GO:0010746	regulation of long-chain fatty acid import across plasma membrane	1/261	5/18866	0.0672914	0.160866	0.107988	THBS1	1
GO:0010957	negative regulation of vitamin D biosynthetic process	1/261	5/18866	0.0672914	0.160866	0.107988	NFKB1	1
GO:0010991	negative regulation of SMAD protein complex assembly	1/261	5/18866	0.0672914	0.160866	0.107988	SMAD6	1
GO:0014004	microglia differentiation	1/261	5/18866	0.0672914	0.160866	0.107988	TLR2	1
GO:0014805	smooth muscle adaptation	1/261	5/18866	0.0672914	0.160866	0.107988	IL1B	1
GO:0015670	carbon dioxide transport	1/261	5/18866	0.0672914	0.160866	0.107988	CA2	1
GO:0015755	fructose transmembrane transport	1/261	5/18866	0.0672914	0.160866	0.107988	SLC2A6	1
GO:0021636	trigeminal nerve morphogenesis	1/261	5/18866	0.0672914	0.160866	0.107988	SEMA3A	1
GO:0021637	trigeminal nerve structural organization	1/261	5/18866	0.0672914	0.160866	0.107988	SEMA3A	1
GO:0030222	eosinophil differentiation	1/261	5/18866	0.0672914	0.160866	0.107988	TRIB1	1
GO:0030321	transepithelial chloride transport	1/261	5/18866	0.0672914	0.160866	0.107988	SLC12A2	1
GO:0030644	cellular chloride ion homeostasis	1/261	5/18866	0.0672914	0.160866	0.107988	SLC12A2	1
GO:0032690	negative regulation of interleukin-1 alpha production	1/261	5/18866	0.0672914	0.160866	0.107988	CX3CL1	1
GO:0032741	positive regulation of interleukin-18 production	1/261	5/18866	0.0672914	0.160866	0.107988	TLR2	1
GO:0032849	positive regulation of cellular pH reduction	1/261	5/18866	0.0672914	0.160866	0.107988	CA2	1
GO:0033591	response to L-ascorbic acid	1/261	5/18866	0.0672914	0.160866	0.107988	ITGA2	1
GO:0035426	extracellular matrix-cell signaling	1/261	5/18866	0.0672914	0.160866	0.107988	NTN4	1
GO:0035442	dipeptide transmembrane transport	1/261	5/18866	0.0672914	0.160866	0.107988	CA2	1
GO:0035509	negative regulation of myosin-light-chain-phosphatase activity	1/261	5/18866	0.0672914	0.160866	0.107988	TNF	1
GO:0035523	protein K29-linked deubiquitination	1/261	5/18866	0.0672914	0.160866	0.107988	TNFAIP3	1
GO:0036324	vascular endothelial growth factor receptor-2 signaling pathway	1/261	5/18866	0.0672914	0.160866	0.107988	KDR	1
GO:0038033	positive regulation of endothelial cell chemotaxis by VEGF-activated vascular endothelial growth factor receptor signaling pathway	1/261	5/18866	0.0672914	0.160866	0.107988	KDR	1
GO:0042488	positive regulation of odontogenesis of dentin-containing tooth	1/261	5/18866	0.0672914	0.160866	0.107988	CSF1	1
GO:0042494	detection of bacterial lipoprotein	1/261	5/18866	0.0672914	0.160866	0.107988	TLR2	1
GO:0042938	dipeptide transport	1/261	5/18866	0.0672914	0.160866	0.107988	CA2	1
GO:0043435	response to corticotropin-releasing hormone	1/261	5/18866	0.0672914	0.160866	0.107988	NR4A2	1
GO:0045338	farnesyl diphosphate metabolic process	1/261	5/18866	0.0672914	0.160866	0.107988	HMGCS1	1
GO:0045578	negative regulation of B cell differentiation	1/261	5/18866	0.0672914	0.160866	0.107988	INHBA	1
GO:0045636	positive regulation of melanocyte differentiation	1/261	5/18866	0.0672914	0.160866	0.107988	KITLG	1
GO:0045794	negative regulation of cell volume	1/261	5/18866	0.0672914	0.160866	0.107988	P2RX7	1
GO:0046351	disaccharide biosynthetic process	1/261	5/18866	0.0672914	0.160866	0.107988	B4GALT1	1
GO:0046813	receptor-mediated virion attachment to host cell	1/261	5/18866	0.0672914	0.160866	0.107988	ICAM1	1
GO:0051140	regulation of NK T cell proliferation	1/261	5/18866	0.0672914	0.160866	0.107988	IL23A	1
GO:0051461	positive regulation of corticotropin secretion	1/261	5/18866	0.0672914	0.160866	0.107988	APLN	1
GO:0052405	negative regulation by host of symbiont molecular function	1/261	5/18866	0.0672914	0.160866	0.107988	PTX3	1
GO:0060398	regulation of growth hormone receptor signaling pathway	1/261	5/18866	0.0672914	0.160866	0.107988	GDF15	1
GO:0061009	common bile duct development	1/261	5/18866	0.0672914	0.160866	0.107988	SOX17	1
GO:0061302	smooth muscle cell-matrix adhesion	1/261	5/18866	0.0672914	0.160866	0.107988	PLAU	1
GO:0061551	trigeminal ganglion development	1/261	5/18866	0.0672914	0.160866	0.107988	SEMA3A	1
GO:0061889	negative regulation of astrocyte activation	1/261	5/18866	0.0672914	0.160866	0.107988	LDLR	1
GO:0070086	ubiquitin-dependent endocytosis	1/261	5/18866	0.0672914	0.160866	0.107988	NEURL1B	1
GO:0070245	positive regulation of thymocyte apoptotic process	1/261	5/18866	0.0672914	0.160866	0.107988	ADAM8	1
GO:0070945	neutrophil-mediated killing of gram-negative bacterium	1/261	5/18866	0.0672914	0.160866	0.107988	CXCL6	1
GO:0070948	regulation of neutrophil mediated cytotoxicity	1/261	5/18866	0.0672914	0.160866	0.107988	CXCL6	1
GO:0071376	cellular response to corticotropin-releasing hormone stimulus	1/261	5/18866	0.0672914	0.160866	0.107988	NR4A2	1
GO:0090679	cell differentiation involved in phenotypic switching	1/261	5/18866	0.0672914	0.160866	0.107988	SOD2	1
GO:0097368	establishment of Sertoli cell barrier	1/261	5/18866	0.0672914	0.160866	0.107988	ICAM1	1
GO:0110011	regulation of basement membrane organization	1/261	5/18866	0.0672914	0.160866	0.107988	PHLDB2	1
GO:1900084	regulation of peptidyl-tyrosine autophosphorylation	1/261	5/18866	0.0672914	0.160866	0.107988	GREM1	1
GO:1900158	negative regulation of bone mineralization involved in bone maturation	1/261	5/18866	0.0672914	0.160866	0.107988	GREM1	1
GO:1901228	positive regulation of transcription from RNA polymerase II promoter involved in heart development	1/261	5/18866	0.0672914	0.160866	0.107988	GREM1	1
GO:1901534	positive regulation of hematopoietic progenitor cell differentiation	1/261	5/18866	0.0672914	0.160866	0.107988	KITLG	1
GO:1902255	positive regulation of intrinsic apoptotic signaling pathway by p53 class mediator	1/261	5/18866	0.0672914	0.160866	0.107988	MSX1	1
GO:1902512	positive regulation of apoptotic DNA fragmentation	1/261	5/18866	0.0672914	0.160866	0.107988	IL6	1
GO:1903596	regulation of gap junction assembly	1/261	5/18866	0.0672914	0.160866	0.107988	IL1B	1
GO:1903936	cellular response to sodium arsenite	1/261	5/18866	0.0672914	0.160866	0.107988	ZC3H12A	1
GO:1904259	regulation of basement membrane assembly involved in embryonic body morphogenesis	1/261	5/18866	0.0672914	0.160866	0.107988	PHLDB2	1
GO:1904261	positive regulation of basement membrane assembly involved in embryonic body morphogenesis	1/261	5/18866	0.0672914	0.160866	0.107988	PHLDB2	1
GO:1904352	positive regulation of protein catabolic process in the vacuole	1/261	5/18866	0.0672914	0.160866	0.107988	LDLR	1
GO:1904997	regulation of leukocyte adhesion to arterial endothelial cell	1/261	5/18866	0.0672914	0.160866	0.107988	TNF	1
GO:1905333	regulation of gastric motility	1/261	5/18866	0.0672914	0.160866	0.107988	TYMP	1
GO:1905420	vascular associated smooth muscle cell differentiation involved in phenotypic switching	1/261	5/18866	0.0672914	0.160866	0.107988	SOD2	1
GO:1905907	negative regulation of amyloid fibril formation	1/261	5/18866	0.0672914	0.160866	0.107988	LDLR	1
GO:1905915	regulation of cell differentiation involved in phenotypic switching	1/261	5/18866	0.0672914	0.160866	0.107988	SOD2	1
GO:1905930	regulation of vascular associated smooth muscle cell differentiation involved in phenotypic switching	1/261	5/18866	0.0672914	0.160866	0.107988	SOD2	1
GO:1990164	histone H2A phosphorylation	1/261	5/18866	0.0672914	0.160866	0.107988	HMGA2	1
GO:2000370	positive regulation of clathrin-dependent endocytosis	1/261	5/18866	0.0672914	0.160866	0.107988	DAB2	1
GO:2000554	regulation of T-helper 1 cell cytokine production	1/261	5/18866	0.0672914	0.160866	0.107988	IL1B	1
GO:2000556	positive regulation of T-helper 1 cell cytokine production	1/261	5/18866	0.0672914	0.160866	0.107988	IL1B	1
GO:2000563	positive regulation of CD4-positive, alpha-beta T cell proliferation	1/261	5/18866	0.0672914	0.160866	0.107988	LGALS9	1
GO:2001023	regulation of response to drug	1/261	5/18866	0.0672914	0.160866	0.107988	HMGA2	1
GO:2001197	basement membrane assembly involved in embryonic body morphogenesis	1/261	5/18866	0.0672914	0.160866	0.107988	PHLDB2	1
GO:0051017	actin filament bundle assembly	5/261	157/18866	0.0673499	0.160924	0.108027	CX3CL1/ID1/MYO1B/PHLDB2/CD47	5
GO:0001558	regulation of cell growth	10/261	420/18866	0.0678871	0.161948	0.108714	SEMA3A/SEMA3C/CEACAM1/INHBA/SERPINE2/SEMA6C/SEMA3D/MSX1/SOX17/GREM1	10
GO:0071559	response to transforming growth factor beta	7/261	258/18866	0.0680427	0.161948	0.108714	ID1/GDF15/THBS1/SMAD6/DAB2/CLDN1/LRG1	7
GO:0040014	regulation of multicellular organism growth	3/261	68/18866	0.0681173	0.161948	0.108714	STC2/GDF15/CSF1	3
GO:0008045	motor neuron axon guidance	2/261	31/18866	0.0681974	0.161948	0.108714	LAMC2/SEMA3A	2
GO:0045940	positive regulation of steroid metabolic process	2/261	31/18866	0.0681974	0.161948	0.108714	IL1B/TNF	2
GO:0045948	positive regulation of translational initiation	2/261	31/18866	0.0681974	0.161948	0.108714	TNF/CCL5	2
GO:0050858	negative regulation of antigen receptor-mediated signaling pathway	2/261	31/18866	0.0681974	0.161948	0.108714	CEACAM1/GBP1	2
GO:0050974	detection of mechanical stimulus involved in sensory perception	2/261	31/18866	0.0681974	0.161948	0.108714	SERPINE2/ITGA2	2
GO:1900745	positive regulation of p38MAPK cascade	2/261	31/18866	0.0681974	0.161948	0.108714	IL1B/ZC3H12A	2
GO:1902253	regulation of intrinsic apoptotic signaling pathway by p53 class mediator	2/261	31/18866	0.0681974	0.161948	0.108714	CD44/MSX1	2
GO:1903792	negative regulation of anion transport	2/261	31/18866	0.0681974	0.161948	0.108714	THBS1/TCAF2	2
GO:0042303	molting cycle	4/261	111/18866	0.0683012	0.161948	0.108714	INHBA/FST/PER1/TNF	4
GO:0042633	hair cycle	4/261	111/18866	0.0683012	0.161948	0.108714	INHBA/FST/PER1/TNF	4
GO:0061387	regulation of extent of cell growth	4/261	111/18866	0.0683012	0.161948	0.108714	SEMA3A/SEMA3C/SEMA6C/SEMA3D	4
GO:0098732	macromolecule deacylation	4/261	111/18866	0.0683012	0.161948	0.108714	HDAC9/FRY/JDP2/PER1	4
GO:0034284	response to monosaccharide	6/261	207/18866	0.0683671	0.161948	0.108714	ICAM1/ANGPT2/NAMPT/THBS1/ITGA2/ERN1	6
GO:1901343	negative regulation of vasculature development	6/261	207/18866	0.0683671	0.161948	0.108714	E2F2/SLC12A2/ANGPT2/THBS1/CXCL10/TNF	6
GO:0030203	glycosaminoglycan metabolic process	5/261	158/18866	0.0688061	0.16274	0.109246	CD44/B4GALT1/NFKB1/DSE/IL1B	5
GO:0035051	cardiocyte differentiation	5/261	158/18866	0.0688061	0.16274	0.109246	SEMA3C/NEBL/JAG1/SOX17/GREM1	5
GO:0060402	calcium ion transport into cytosol	5/261	158/18866	0.0688061	0.16274	0.109246	CX3CL1/P2RX7/CXCL10/CXCL11/LYN	5
GO:0010038	response to metal ion	9/261	366/18866	0.0689868	0.163085	0.109477	SLC12A2/P2RX7/ICAM1/CA2/IL1A/MT2A/THBS1/CLDN1/JUNB	9
GO:0070588	calcium ion transmembrane transport	8/261	312/18866	0.0692049	0.163518	0.109768	CX3CL1/P2RX7/DYSF/CACNA1A/RRAD/CXCL10/CXCL11/LYN	8
GO:1902905	positive regulation of supramolecular fiber organization	6/261	208/18866	0.0696255	0.164429	0.110379	CX3CL1/NAV3/ICAM1/CSF3/ID1/CD47	6
GO:0001938	positive regulation of endothelial cell proliferation	4/261	113/18866	0.07192	0.169078	0.1135	KDR/DYSF/LRG1/APLN	4
GO:0002223	stimulatory C-type lectin receptor signaling pathway	4/261	113/18866	0.07192	0.169078	0.1135	RELB/NFKB1/CLEC4E/LYN	4
GO:0003176	aortic valve development	2/261	32/18866	0.0721002	0.169078	0.1135	JAG1/SMAD6	2
GO:0009164	nucleoside catabolic process	2/261	32/18866	0.0721002	0.169078	0.1135	TYMP/APOBEC3G	2
GO:0035456	response to interferon-beta	2/261	32/18866	0.0721002	0.169078	0.1135	IRF1/IKBKE	2
GO:0035767	endothelial cell chemotaxis	2/261	32/18866	0.0721002	0.169078	0.1135	KDR/THBS1	2
GO:0043304	regulation of mast cell degranulation	2/261	32/18866	0.0721002	0.169078	0.1135	LGALS9/LYN	2
GO:0045589	regulation of regulatory T cell differentiation	2/261	32/18866	0.0721002	0.169078	0.1135	IRF1/LGALS9	2
GO:0046475	glycerophospholipid catabolic process	2/261	32/18866	0.0721002	0.169078	0.1135	PLA2G4C/LDLR	2
GO:0048741	skeletal muscle fiber development	2/261	32/18866	0.0721002	0.169078	0.1135	HDAC9/DNER	2
GO:0060317	cardiac epithelial to mesenchymal transition	2/261	32/18866	0.0721002	0.169078	0.1135	JAG1/MSX1	2
GO:0071353	cellular response to interleukin-4	2/261	32/18866	0.0721002	0.169078	0.1135	JAK3/IL24	2
GO:0097421	liver regeneration	2/261	32/18866	0.0721002	0.169078	0.1135	IL6/CLDN1	2
GO:1903959	regulation of anion transmembrane transport	2/261	32/18866	0.0721002	0.169078	0.1135	THBS1/TCAF2	2
GO:0045216	cell-cell junction organization	6/261	210/18866	0.0721825	0.169186	0.113572	LIMS2/DSP/IL1B/CLDN14/CLDN1/TNF	6
GO:0009880	embryonic pattern specification	3/261	70/18866	0.0729534	0.170821	0.11467	SEMA3A/ZBTB16/SMAD6	3
GO:0032374	regulation of cholesterol transport	3/261	70/18866	0.0729534	0.170821	0.11467	NFKBIA/LIPG/NFKB1	3
GO:0061572	actin filament bundle organization	5/261	161/18866	0.0732785	0.171497	0.115124	CX3CL1/ID1/MYO1B/PHLDB2/CD47	5
GO:0003279	cardiac septum development	4/261	114/18866	0.0737655	0.172378	0.115715	ADAMTS6/SEMA3C/JAG1/SMAD6	4
[truncated: 2,677 more rows]

## Sheet: GO Molecular function
ID	Description	GeneRatio	BgRatio	pvalue	p.adjust	qvalue	geneID	Count
GO:0005125	cytokine activity	31/262	235/18352	3.95576e-21	2.63058e-18	2.13195e-18	CX3CL1/IL32/KITLG/CXCL2/TNFSF13B/NAMPT/CSF3/CCL2/IL23A/IL1A/CCL20/TNFSF10/INHBA/CXCL6/IL1B/GDF15/IL6/IL1RN/IL24/CXCL3/CXCL5/CXCL1/GREM1/CXCL10/CXCL11/CXCL8/CSF1/LTA/LTB/TNF/CCL5	31
GO:0048018	receptor ligand activity	41/262	487/18352	3.27956e-20	1.05924e-17	8.58455e-18	CX3CL1/IL32/TYMP/KITLG/SEMA3A/SEMA3C/CXCL2/JAG1/TNFSF13B/NAMPT/CSF3/CCL2/IL23A/STC2/IL1A/CCL20/TNFSF10/INHBA/CXCL6/IL1B/GDF15/IL6/IL1RN/FGF5/SEMA6C/PDGFC/SEMA3D/IL24/CXCL3/CXCL5/CXCL1/GREM1/CXCL10/CXCL11/CXCL8/APLN/CSF1/LTA/LTB/TNF/CCL5	41
GO:0030546	signaling receptor activator activity	41/262	492/18352	4.77851e-20	1.05924e-17	8.58455e-18	CX3CL1/IL32/TYMP/KITLG/SEMA3A/SEMA3C/CXCL2/JAG1/TNFSF13B/NAMPT/CSF3/CCL2/IL23A/STC2/IL1A/CCL20/TNFSF10/INHBA/CXCL6/IL1B/GDF15/IL6/IL1RN/FGF5/SEMA6C/PDGFC/SEMA3D/IL24/CXCL3/CXCL5/CXCL1/GREM1/CXCL10/CXCL11/CXCL8/APLN/CSF1/LTA/LTB/TNF/CCL5	41
GO:0005126	cytokine receptor binding	29/262	271/18352	2.6523e-17	4.40945e-15	3.57363e-15	CX3CL1/KITLG/TRAF1/CXCL2/TNFSF13B/CSF3/CCL2/IL23A/IL1A/CCL20/TNFSF10/CXCL6/IL1B/IL6/IL1RN/SMAD6/CXCL3/CXCL5/CXCL1/GREM1/CXCL10/CXCL11/CXCL8/LRG1/CSF1/LTA/LTB/TNF/CCL5	29
GO:0045236	CXCR chemokine receptor binding	9/262	18/18352	9.33447e-13	1.24149e-10	1.00616e-10	CX3CL1/CXCL2/CXCL6/CXCL3/CXCL5/CXCL1/CXCL10/CXCL11/CXCL8	9
GO:0008009	chemokine activity	12/262	49/18352	3.21805e-12	3.56667e-10	2.8906e-10	CX3CL1/CXCL2/CCL2/CCL20/CXCL6/CXCL3/CXCL5/CXCL1/CXCL10/CXCL11/CXCL8/CCL5	12
GO:0042379	chemokine receptor binding	12/262	70/18352	2.8453e-10	2.70304e-08	2.19067e-08	CX3CL1/CXCL2/CCL2/CCL20/CXCL6/CXCL3/CXCL5/CXCL1/CXCL10/CXCL11/CXCL8/CCL5	12
GO:0001664	G protein-coupled receptor binding	18/262	293/18352	2.37324e-07	1.97275e-05	1.59881e-05	CX3CL1/RALA/CXCL2/CCL2/CCL20/CXCL6/C3/RTP4/CXCL3/CXCL5/CXCL1/GPRC5B/CXCL10/CXCL11/CXCL8/APLN/SAA1/CCL5	18
GO:0005164	tumor necrosis factor receptor binding	6/262	31/18352	4.36268e-06	0.000322353	0.00026125	TRAF1/TNFSF13B/TNFSF10/LTA/LTB/TNF	6
GO:0070851	growth factor receptor binding	11/262	141/18352	5.82868e-06	0.000387607	0.000314135	CSF3/IL1A/IL1B/IL6/IL1RN/FGF5/PDGFC/ESM1/GREM1/ERN1/LYN	11
GO:0008083	growth factor activity	11/262	162/18352	2.17551e-05	0.0013152	0.0010659	TYMP/KITLG/JAG1/CSF3/INHBA/GDF15/IL6/FGF5/PDGFC/CXCL1/CSF1	11
GO:0005539	glycosaminoglycan binding	13/262	232/18352	3.05636e-05	0.00169373	0.00137268	CD44/LAMC2/LIPG/TNFAIP6/CXCL6/SERPINE2/TLR2/THBS1/HAPLN3/ABI3BP/CXCL10/CXCL11/SAA1	13
GO:0005178	integrin binding	10/262	144/18352	4.25164e-05	0.00217488	0.00176262	CX3CL1/ICAM1/IL1B/KDR/THBS1/PLPP3/VCAM1/ITGA2/ESM1/LYN	10
GO:0032813	tumor necrosis factor receptor superfamily binding	6/262	48/18352	5.93478e-05	0.00281902	0.00228467	TRAF1/TNFSF13B/TNFSF10/LTA/LTB/TNF	6
GO:0030215	semaphorin receptor binding	4/262	23/18352	0.000290289	0.0128695	0.01043	SEMA3A/SEMA3C/SEMA6C/SEMA3D	4
GO:0005518	collagen binding	6/262	70/18352	0.000488137	0.0202882	0.0164425	CD44/THBS1/ABI3BP/CTSS/ITGA2/C1QTNF1	6
GO:0008970	phospholipase A1 activity	3/262	12/18352	0.000575271	0.0211019	0.0171019	LIPG/PLA2G4C/PLA1A	3
GO:0005153	interleukin-8 receptor binding	2/262	3/18352	0.00060339	0.0211019	0.0171019	CX3CL1/CXCL8	2
GO:0046592	polyamine oxidase activity	2/262	3/18352	0.00060339	0.0211019	0.0171019	SMOX/IL4I1	2
GO:0045499	chemorepellent activity	4/262	28/18352	0.000634642	0.0211019	0.0171019	SEMA3A/SEMA3C/SEMA6C/SEMA3D	4
GO:0043236	laminin binding	4/262	29/18352	0.000727992	0.022288	0.0180633	NTN4/THBS1/CTSS/ITGA2	4
GO:0008201	heparin binding	9/262	169/18352	0.000737349	0.022288	0.0180633	LAMC2/LIPG/CXCL6/SERPINE2/THBS1/ABI3BP/CXCL10/CXCL11/SAA1	9
GO:0048019	receptor antagonist activity	4/262	32/18352	0.00106585	0.030817	0.0249755	FST/IL1RN/IL18BP/CCL5	4
GO:0005161	platelet-derived growth factor receptor binding	3/262	15/18352	0.00115263	0.0313656	0.0254201	PDGFC/ERN1/LYN	3
GO:0016647	oxidoreductase activity, acting on the CH-NH group of donors, oxygen as acceptor	2/262	4/18352	0.00119539	0.0313656	0.0254201	SMOX/IL4I1	2
GO:0043621	protein self-association	5/262	57/18352	0.00130461	0.0313656	0.0254201	TNFAIP3/ID1/ADAM8/NKX3-1/CCL5	5
GO:0050840	extracellular matrix binding	5/262	57/18352	0.00130461	0.0313656	0.0254201	NTN4/THSD1/THBS1/CTSS/ITGA2	5
GO:0005149	interleukin-1 receptor binding	3/262	16/18352	0.00140372	0.0313656	0.0254201	IL1A/IL1B/IL1RN	3
GO:0016641	oxidoreductase activity, acting on the CH-NH2 group of donors, oxygen as acceptor	3/262	16/18352	0.00140372	0.0313656	0.0254201	IL4I1/VCAM1/MAOA	3
GO:1901681	sulfur compound binding	11/262	262/18352	0.00141499	0.0313656	0.0254201	LAMC2/LIPG/CXCL6/FST/SERPINE2/THBS1/ABI3BP/ITGA2/CXCL10/CXCL11/SAA1	11
GO:0043394	proteoglycan binding	4/262	36/18352	0.00166969	0.0358176	0.0290283	FST/THBS1/CTSS/ITGA2	4
GO:0048248	CXCR3 chemokine receptor binding	2/262	5/18352	0.00197355	0.0410128	0.0332387	CXCL10/CXCL11	2
GO:0030547	receptor inhibitor activity	4/262	41/18352	0.00271505	0.0535842	0.0434271	FST/IL1RN/IL18BP/CCL5	4
GO:0016638	oxidoreductase activity, acting on the CH-NH2 group of donors	3/262	20/18352	0.00273964	0.0535842	0.0434271	IL4I1/VCAM1/MAOA	3
GO:0008131	primary amine oxidase activity	2/262	6/18352	0.00293245	0.0548191	0.044428	VCAM1/MAOA	2
GO:0051879	Hsp90 protein binding	4/262	42/18352	0.00296765	0.0548191	0.044428	SLC12A2/GBP1/KDR/ERN1	4
GO:0005540	hyaluronic acid binding	3/262	22/18352	0.0036239	0.0651323	0.0527863	CD44/TNFAIP6/HAPLN3	3
GO:0031625	ubiquitin protein ligase binding	11/262	297/18352	0.00373517	0.0653655	0.0529753	RALA/TRAF1/NFKBIA/DDX58/BLZF1/SMAD6/TRIB1/PER1/DIO2/LYN/IKBKE	11
GO:0048020	CCR chemokine receptor binding	4/262	47/18352	0.00447361	0.0762809	0.0618216	CX3CL1/CCL2/CCL20/CCL5	4
GO:0070696	transmembrane receptor protein serine/threonine kinase binding	3/262	24/18352	0.00466387	0.0775369	0.0628396	INHBA/GDF15/SMAD6	3
GO:0001849	complement component C1q complex binding	2/262	8/18352	0.00537152	0.0871235	0.070609	CD93/PTX3	2
GO:0044389	ubiquitin-like protein ligase binding	11/262	316/18352	0.00590849	0.0935511	0.0758182	RALA/TRAF1/NFKBIA/DDX58/BLZF1/SMAD6/TRIB1/PER1/DIO2/LYN/IKBKE	11
GO:0005080	protein kinase C binding	4/262	55/18352	0.00782907	0.120762	0.0978716	HDAC9/DSP/CAVIN2/IRS1	4
GO:0033612	receptor serine/threonine kinase binding	3/262	29/18352	0.0079903	0.120762	0.0978716	INHBA/GDF15/SMAD6	3
GO:0052739	phosphatidylserine 1-acylhydrolase activity	2/262	11/18352	0.0102574	0.121715	0.0986438	LIPG/PLA1A	2
GO:0070697	activin receptor binding	2/262	11/18352	0.0102574	0.121715	0.0986438	INHBA/SMAD6	2
GO:0051019	mitogen-activated protein kinase binding	3/262	33/18352	0.0114429	0.121715	0.0986438	DUSP4/GCH1/TNIP1	3
GO:0061578	Lys63-specific deubiquitinase activity	2/262	12/18352	0.0121938	0.121715	0.0986438	CYLD/TNFAIP3	2
GO:0016814	hydrolase activity, acting on carbon-nitrogen (but not peptide) bonds, in cyclic amidines	3/262	35/18352	0.0134439	0.121715	0.0986438	GCH1/LACC1/APOBEC3G	3
GO:0031005	filamin binding	2/262	13/18352	0.0142763	0.121715	0.0986438	NEBL/CEACAM1	2
GO:0086080	protein binding involved in heterotypic cell-cell adhesion	2/262	13/18352	0.0142763	0.121715	0.0986438	DSP/CD47	2
GO:0001716	L-amino-acid oxidase activity	1/262	1/18352	0.0142764	0.121715	0.0986438	IL4I1	1
GO:0003933	GTP cyclohydrolase activity	1/262	1/18352	0.0142764	0.121715	0.0986438	GCH1	1
GO:0003934	GTP cyclohydrolase I activity	1/262	1/18352	0.0142764	0.121715	0.0986438	GCH1	1
GO:0004506	squalene monooxygenase activity	1/262	1/18352	0.0142764	0.121715	0.0986438	SQLE	1
GO:0005130	granulocyte colony-stimulating factor receptor binding	1/262	1/18352	0.0142764	0.121715	0.0986438	CSF3	1
GO:0008859	exoribonuclease II activity	1/262	1/18352	0.0142764	0.121715	0.0986438	ISG20	1
GO:0009032	thymidine phosphorylase activity	1/262	1/18352	0.0142764	0.121715	0.0986438	TYMP	1
GO:0016154	pyrimidine-nucleoside phosphorylase activity	1/262	1/18352	0.0142764	0.121715	0.0986438	TYMP	1
GO:0030377	urokinase plasminogen activator receptor activity	1/262	1/18352	0.0142764	0.121715	0.0986438	PLAUR	1
GO:0031714	C5a anaphylatoxin chemotactic receptor binding	1/262	1/18352	0.0142764	0.121715	0.0986438	C3	1
GO:0031715	C5L2 anaphylatoxin chemotactic receptor binding	1/262	1/18352	0.0142764	0.121715	0.0986438	C3	1
GO:0031737	CX3C chemokine receptor binding	1/262	1/18352	0.0142764	0.121715	0.0986438	CX3CL1	1
GO:0035501	MH1 domain binding	1/262	1/18352	0.0142764	0.121715	0.0986438	HMGA2	1
GO:0042497	triacyl lipopeptide binding	1/262	1/18352	0.0142764	0.121715	0.0986438	TLR2	1
GO:0045237	CXCR1 chemokine receptor binding	1/262	1/18352	0.0142764	0.121715	0.0986438	CX3CL1	1
GO:0045352	interleukin-1 type I receptor antagonist activity	1/262	1/18352	0.0142764	0.121715	0.0986438	IL1RN	1
GO:0045353	interleukin-1 type II receptor antagonist activity	1/262	1/18352	0.0142764	0.121715	0.0986438	IL1RN	1
GO:0046817	chemokine receptor antagonist activity	1/262	1/18352	0.0142764	0.121715	0.0986438	CCL5	1
GO:0047280	nicotinamide phosphoribosyltransferase activity	1/262	1/18352	0.0142764	0.121715	0.0986438	NAMPT	1
GO:0047975	guanosine phosphorylase activity	1/262	1/18352	0.0142764	0.121715	0.0986438	LACC1	1
GO:0052894	norspermine:oxygen oxidoreductase activity	1/262	1/18352	0.0142764	0.121715	0.0986438	SMOX	1
GO:0052895	N1-acetylspermine:oxygen oxidoreductase (N1-acetylspermidine-forming) activity	1/262	1/18352	0.0142764	0.121715	0.0986438	SMOX	1
GO:0070089	chloride-activated potassium channel activity	1/262	1/18352	0.0142764	0.121715	0.0986438	KCNT2	1
GO:0097162	MADS box domain binding	1/262	1/18352	0.0142764	0.121715	0.0986438	NKX3-1	1
GO:0102008	cytosolic dipeptidase activity	1/262	1/18352	0.0142764	0.121715	0.0986438	CNDP2	1
GO:0103046	alanylglutamate dipeptidase activity	1/262	1/18352	0.0142764	0.121715	0.0986438	CNDP2	1
GO:1990439	MAP kinase serine/threonine phosphatase activity	1/262	1/18352	0.0142764	0.121715	0.0986438	DUSP4	1
GO:0042056	chemoattractant activity	3/262	37/18352	0.0156315	0.131582	0.10664	CX3CL1/CXCL10/CCL5	3
GO:0001846	opsonin binding	2/262	15/18352	0.0188616	0.154852	0.125499	CD93/PTX3	2
GO:0070492	oligosaccharide binding	2/262	15/18352	0.0188616	0.154852	0.125499	SELE/LGALS9	2
GO:0003924	GTPase activity	10/262	326/18352	0.019104	0.154929	0.125561	RALA/GBP3/GBP1/GCH1/GBP5/GBP2/GBP4/RRAD/MX2/RAB42	10
GO:0043395	heparan sulfate proteoglycan binding	2/262	16/18352	0.0213556	0.161133	0.13059	FST/ITGA2	2
GO:0001618	virus receptor activity	4/262	74/18352	0.021434	0.161133	0.13059	ICAM1/LDLR/CLDN1/ITGA2	4
GO:0140272	exogenous protein binding	4/262	74/18352	0.021434	0.161133	0.13059	ICAM1/LDLR/CLDN1/ITGA2	4
GO:0043028	cysteine-type endopeptidase regulator activity involved in apoptotic process	3/262	43/18352	0.0233299	0.161133	0.13059	BIRC3/TNFAIP8/NKX3-1	3
GO:0003725	double-stranded RNA binding	4/262	76/18352	0.0233825	0.161133	0.13059	DDX58/DHX58/IFIH1/OASL	4
GO:0030169	low-density lipoprotein particle binding	2/262	17/18352	0.0239781	0.161133	0.13059	LDLR/THBS1	2
GO:0001540	amyloid-beta binding	4/262	77/18352	0.0243957	0.161133	0.13059	LDLR/TLR2/CACNA1A/ITGA2	4
GO:0003724	RNA helicase activity	4/262	77/18352	0.0243957	0.161133	0.13059	DDX58/DHX58/IFIH1/DDX60L	4
GO:0046965	retinoid X receptor binding	2/262	18/18352	0.0267251	0.161133	0.13059	NR4A2/ARID5A	2
GO:0004715	non-membrane spanning protein tyrosine kinase activity	3/262	46/18352	0.027821	0.161133	0.13059	RIPK2/JAK3/LYN	3
GO:0001872	(1->3)-beta-D-glucan binding	1/262	2/18352	0.0283497	0.161133	0.13059	PTX3	1
GO:0003920	GMP reductase activity	1/262	2/18352	0.0283497	0.161133	0.13059	GMPR	1
GO:0004421	hydroxymethylglutaryl-CoA synthase activity	1/262	2/18352	0.0283497	0.161133	0.13059	HMGCS1	1
GO:0004586	ornithine decarboxylase activity	1/262	2/18352	0.0283497	0.161133	0.13059	ODC1	1
GO:0004830	tryptophan-tRNA ligase activity	1/262	2/18352	0.0283497	0.161133	0.13059	WARS1	1
GO:0004917	interleukin-7 receptor activity	1/262	2/18352	0.0283497	0.161133	0.13059	IL7R	1
GO:0005150	interleukin-1, type I receptor binding	1/262	2/18352	0.0283497	0.161133	0.13059	IL1RN	1
GO:0005151	interleukin-1, type II receptor binding	1/262	2/18352	0.0283497	0.161133	0.13059	IL1RN	1
GO:0005171	hepatocyte growth factor receptor binding	1/262	2/18352	0.0283497	0.161133	0.13059	ESM1	1
GO:0005228	intracellular sodium activated potassium channel activity	1/262	2/18352	0.0283497	0.161133	0.13059	KCNT2	1
GO:0016657	oxidoreductase activity, acting on NAD(P)H, nitrogenous group as acceptor	1/262	2/18352	0.0283497	0.161133	0.13059	GMPR	1
GO:0017061	S-methyl-5-thioadenosine phosphorylase activity	1/262	2/18352	0.0283497	0.161133	0.13059	LACC1	1
GO:0019809	spermidine binding	1/262	2/18352	0.0283497	0.161133	0.13059	SAT1	1
GO:0031704	apelin receptor binding	1/262	2/18352	0.0283497	0.161133	0.13059	APLN	1
GO:0031729	CCR4 chemokine receptor binding	1/262	2/18352	0.0283497	0.161133	0.13059	CCL5	1
GO:0031753	endothelial differentiation G protein-coupled receptor binding	1/262	2/18352	0.0283497	0.161133	0.13059	RALA	1
GO:0031755	Edg-2 lysophosphatidic acid receptor binding	1/262	2/18352	0.0283497	0.161133	0.13059	RALA	1
GO:0033798	thyroxine 5-deiodinase activity	1/262	2/18352	0.0283497	0.161133	0.13059	DIO2	1
GO:0035500	MH2 domain binding	1/262	2/18352	0.0283497	0.161133	0.13059	HMGA2	1
GO:0038102	activin receptor antagonist activity	1/262	2/18352	0.0283497	0.161133	0.13059	FST	1
GO:0042007	interleukin-18 binding	1/262	2/18352	0.0283497	0.161133	0.13059	IL18BP	1
GO:0045519	interleukin-23 receptor binding	1/262	2/18352	0.0283497	0.161133	0.13059	IL23A	1
GO:0047757	chondroitin-glucuronate 5-epimerase activity	1/262	2/18352	0.0283497	0.161133	0.13059	DSE	1
GO:0052901	spermine:oxygen oxidoreductase (spermidine-forming) activity	1/262	2/18352	0.0283497	0.161133	0.13059	SMOX	1
GO:0070052	collagen V binding	1/262	2/18352	0.0283497	0.161133	0.13059	THBS1	1
GO:0030296	protein tyrosine kinase activator activity	2/262	19/18352	0.0295923	0.16677	0.135159	GREM1/CCL5	2
GO:0005546	phosphatidylinositol-4,5-bisphosphate binding	4/262	82/18352	0.0298573	0.16685	0.135223	PLEKHA4/KCNJ2/SDCBP2/MYO1B	4
GO:0016763	transferase activity, transferring pentosyl groups	3/262	50/18352	0.0344711	0.189449	0.153538	TYMP/NAMPT/LACC1	3
GO:0070888	E-box binding	3/262	50/18352	0.0344711	0.189449	0.153538	BHLHE40/ATOH8/PER1	3
GO:0001848	complement binding	2/262	21/18352	0.0356721	0.194442	0.157585	CD93/PTX3	2
GO:0031593	polyubiquitin modification-dependent protein binding	3/262	51/18352	0.0362508	0.19599	0.15884	TNFAIP3/TNIP1/IKBKE	3
GO:0030742	GTP-dependent protein binding	2/262	23/18352	0.0421867	0.197734	0.160253	GCH1/RAPGEF5	2
GO:0038187	pattern recognition receptor activity	2/262	23/18352	0.0421867	0.197734	0.160253	TLR2/CLEC4E	2
GO:0004145	diamine N-acetyltransferase activity	1/262	3/18352	0.0422229	0.197734	0.160253	SAT1	1
GO:0004461	lactose synthase activity	1/262	3/18352	0.0422229	0.197734	0.160253	B4GALT1	1
GO:0004514	nicotinate-nucleotide diphosphorylase (carboxylating) activity	1/262	3/18352	0.0422229	0.197734	0.160253	NAMPT	1
GO:0004731	purine-nucleoside phosphorylase activity	1/262	3/18352	0.0422229	0.197734	0.160253	LACC1	1
GO:0004800	thyroxine 5'-deiodinase activity	1/262	3/18352	0.0422229	0.197734	0.160253	DIO2	1
GO:0005152	interleukin-1 receptor antagonist activity	1/262	3/18352	0.0422229	0.197734	0.160253	IL1RN	1
GO:0005157	macrophage colony-stimulating factor receptor binding	1/262	3/18352	0.0422229	0.197734	0.160253	CSF1	1
GO:0005308	creatine transmembrane transporter activity	1/262	3/18352	0.0422229	0.197734	0.160253	SLC16A12	1
GO:0008384	IkappaB kinase activity	1/262	3/18352	0.0422229	0.197734	0.160253	IKBKE	1
GO:0008511	sodium:potassium:chloride symporter activity	1/262	3/18352	0.0422229	0.197734	0.160253	SLC12A2	1
GO:0009674	potassium:sodium symporter activity	1/262	3/18352	0.0422229	0.197734	0.160253	SLC12A2	1
GO:0019808	polyamine binding	1/262	3/18352	0.0422229	0.197734	0.160253	SAT1	1
GO:0030298	receptor signaling protein tyrosine kinase activator activity	1/262	3/18352	0.0422229	0.197734	0.160253	CCL5	1
GO:0034739	histone deacetylase activity (H4-K16 specific)	1/262	3/18352	0.0422229	0.197734	0.160253	HDAC9	1
GO:0046979	TAP2 binding	1/262	3/18352	0.0422229	0.197734	0.160253	HLA-F	1
GO:0070699	type II activin receptor binding	1/262	3/18352	0.0422229	0.197734	0.160253	INHBA	1
GO:0097108	hedgehog family protein binding	1/262	3/18352	0.0422229	0.197734	0.160253	HHIP	1
GO:0005525	GTP binding	10/262	376/18352	0.0442169	0.205289	0.166376	RALA/GBP3/GBP1/GCH1/GBP5/GBP2/GBP4/RRAD/MX2/RAB42	10
GO:0019955	cytokine binding	5/262	135/18352	0.0444536	0.205289	0.166376	GBP1/IL1RN/IL18BP/THBS1/GREM1	5
GO:0005160	transforming growth factor beta receptor binding	2/262	24/18352	0.0455979	0.207864	0.168463	SMAD6/LRG1	2
GO:0019838	growth factor binding	5/262	136/18352	0.0456363	0.207864	0.168463	KDR/RHBDF2/IL1RN/THBS1/ESM1	5
GO:0061134	peptidase regulator activity	7/262	229/18352	0.0466034	0.209299	0.169626	BIRC3/TFPI2/C3/SERPINE2/TNFAIP8/TIMP4/NKX3-1	7
GO:0002020	protease binding	5/262	137/18352	0.0468376	0.209299	0.169626	RIPK2/TNFAIP3/LDLR/TIMP4/TNF	5
GO:0032550	purine ribonucleoside binding	10/262	380/18352	0.0468956	0.209299	0.169626	RALA/GBP3/GBP1/GCH1/GBP5/GBP2/GBP4/RRAD/MX2/RAB42	10
GO:0004866	endopeptidase inhibitor activity	6/262	183/18352	0.0478114	0.211964	0.171785	BIRC3/TFPI2/C3/SERPINE2/TNFAIP8/TIMP4	6
GO:0001883	purine nucleoside binding	10/262	383/18352	0.0489752	0.213438	0.17298	RALA/GBP3/GBP1/GCH1/GBP5/GBP2/GBP4/RRAD/MX2/RAB42	10
GO:0032549	ribonucleoside binding	10/262	383/18352	0.0489752	0.213438	0.17298	RALA/GBP3/GBP1/GCH1/GBP5/GBP2/GBP4/RRAD/MX2/RAB42	10
GO:0043027	cysteine-type endopeptidase inhibitor activity involved in apoptotic process	2/262	25/18352	0.0491068	0.213438	0.17298	BIRC3/TNFAIP8	2
GO:1990782	protein tyrosine kinase binding	4/262	98/18352	0.051843	0.219351	0.177772	CEACAM1/ANGPT2/DOCK4/IRS1	4
GO:0008028	monocarboxylic acid transmembrane transporter activity	3/262	59/18352	0.0521352	0.219351	0.177772	CEACAM1/SLC16A6/SLC16A12	3
GO:0005112	Notch binding	2/262	26/18352	0.0527102	0.219351	0.177772	JAG1/DNER	2
GO:0001882	nucleoside binding	10/262	389/18352	0.0533183	0.219351	0.177772	RALA/GBP3/GBP1/GCH1/GBP5/GBP2/GBP4/RRAD/MX2/RAB42	10
GO:0030414	peptidase inhibitor activity	6/262	189/18352	0.0543142	0.219351	0.177772	BIRC3/TFPI2/C3/SERPINE2/TNFAIP8/TIMP4	6
GO:0098631	cell adhesion mediator activity	3/262	60/18352	0.0543216	0.219351	0.177772	DSP/ITGA2/CD47	3
GO:0005173	stem cell factor receptor binding	1/262	4/18352	0.0558987	0.219351	0.177772	KITLG	1
GO:0005353	fructose transmembrane transporter activity	1/262	4/18352	0.0558987	0.219351	0.177772	SLC2A6	1
GO:0005534	galactose binding	1/262	4/18352	0.0558987	0.219351	0.177772	LGALS9	1
GO:0016941	natriuretic peptide receptor activity	1/262	4/18352	0.0558987	0.219351	0.177772	NPR3	1
GO:0030229	very-low-density lipoprotein particle receptor activity	1/262	4/18352	0.0558987	0.219351	0.177772	LDLR	1
GO:0038191	neuropilin binding	1/262	4/18352	0.0558987	0.219351	0.177772	SEMA3A	1
GO:0048030	disaccharide binding	1/262	4/18352	0.0558987	0.219351	0.177772	LGALS9	1
GO:0070053	thrombospondin receptor activity	1/262	4/18352	0.0558987	0.219351	0.177772	CD47	1
GO:0070698	type I activin receptor binding	1/262	4/18352	0.0558987	0.219351	0.177772	SMAD6	1
GO:0140031	phosphorylation-dependent protein binding	1/262	4/18352	0.0558987	0.219351	0.177772	LYN	1
GO:0001968	fibronectin binding	2/262	27/18352	0.0564045	0.219351	0.177772	THBS1/CTSS	2
GO:0042974	retinoic acid receptor binding	2/262	27/18352	0.0564045	0.219351	0.177772	NR4A2/ARID5A	2
GO:0061135	endopeptidase regulator activity	6/262	192/18352	0.0577571	0.223305	0.180977	BIRC3/TFPI2/C3/SERPINE2/TNFAIP8/TIMP4	6
GO:0019001	guanyl nucleotide binding	10/262	397/18352	0.0594966	0.226165	0.183295	RALA/GBP3/GBP1/GCH1/GBP5/GBP2/GBP4/RRAD/MX2/RAB42	10
GO:0032561	guanyl ribonucleotide binding	10/262	397/18352	0.0594966	0.226165	0.183295	RALA/GBP3/GBP1/GCH1/GBP5/GBP2/GBP4/RRAD/MX2/RAB42	10
GO:0016645	oxidoreductase activity, acting on the CH-NH group of donors	2/262	28/18352	0.0601864	0.226165	0.183295	SMOX/IL4I1	2
GO:0005543	phospholipid binding	11/262	454/18352	0.0620061	0.226165	0.183295	JAG1/PLA2G4C/PLEKHA4/SGIP1/KCNJ2/SDCBP2/MYO1B/DYSF/THBS1/PHLDA1/CAVIN2	11
GO:0030145	manganese ion binding	3/262	64/18352	0.0634967	0.226165	0.183295	LAP3/B4GALT1/SOD2	3
GO:0004620	phospholipase activity	4/262	105/18352	0.0636233	0.226165	0.183295	LIPG/PLA2G4C/PLA1A/CCL5	4
GO:0004806	triglyceride lipase activity	2/262	29/18352	0.0640528	0.226165	0.183295	LIPG/PLA1A	2
GO:0046966	thyroid hormone receptor binding	2/262	30/18352	0.0680005	0.226165	0.183295	OASL/ARID5A	2
GO:0000064	L-ornithine transmembrane transporter activity	1/262	5/18352	0.06938	0.226165	0.183295	SLC7A2	1
GO:0001875	lipopolysaccharide immune receptor activity	1/262	5/18352	0.06938	0.226165	0.183295	TLR2	1
GO:0003831	beta-N-acetylglucosaminylglycopeptide beta-1,4-galactosyltransferase activity	1/262	5/18352	0.06938	0.226165	0.183295	B4GALT1	1
GO:0003945	N-acetyllactosamine synthase activity	1/262	5/18352	0.06938	0.226165	0.183295	B4GALT1	1
GO:0004465	lipoprotein lipase activity	1/262	5/18352	0.06938	0.226165	0.183295	LIPG	1
GO:0004784	superoxide dismutase activity	1/262	5/18352	0.06938	0.226165	0.183295	SOD2	1
GO:0008310	single-stranded DNA 3'-5' exodeoxyribonuclease activity	1/262	5/18352	0.06938	0.226165	0.183295	ISG20	1
GO:0016721	oxidoreductase activity, acting on superoxide radicals as acceptor	1/262	5/18352	0.06938	0.226165	0.183295	SOD2	1
GO:0017034	Rap guanyl-nucleotide exchange factor activity	1/262	5/18352	0.06938	0.226165	0.183295	RAPGEF5	1
GO:0019238	cyclohydrolase activity	1/262	5/18352	0.06938	0.226165	0.183295	GCH1	1
GO:0030284	estrogen receptor activity	1/262	5/18352	0.06938	0.226165	0.183295	NKX3-1	1
GO:0030620	U2 snRNA binding	1/262	5/18352	0.06938	0.226165	0.183295	ISG20	1
GO:0031726	CCR1 chemokine receptor binding	1/262	5/18352	0.06938	0.226165	0.183295	CCL5	1
GO:0034711	inhibin binding	1/262	5/18352	0.06938	0.226165	0.183295	INHBA	1
GO:0038085	vascular endothelial growth factor binding	1/262	5/18352	0.06938	0.226165	0.183295	KDR	1
GO:0043426	MRF binding	1/262	5/18352	0.06938	0.226165	0.183295	BHLHE40	1
GO:0045569	TRAIL binding	1/262	5/18352	0.06938	0.226165	0.183295	TNFSF10	1
GO:0046912	transferase activity, transferring acyl groups, acyl groups converted into alkyl on transfer	1/262	5/18352	0.06938	0.226165	0.183295	HMGCS1	1
GO:0046978	TAP1 binding	1/262	5/18352	0.06938	0.226165	0.183295	HLA-F	1
GO:0051575	5'-deoxyribose-5-phosphate lyase activity	1/262	5/18352	0.06938	0.226165	0.183295	HMGA2	1
GO:0070051	fibrinogen binding	1/262	5/18352	0.06938	0.226165	0.183295	THBS1	1
GO:0086083	cell adhesive protein binding involved in bundle of His cell-Purkinje myocyte communication	1/262	5/18352	0.06938	0.226165	0.183295	DSP	1
GO:0098639	collagen binding involved in cell-matrix adhesion	1/262	5/18352	0.06938	0.226165	0.183295	ITGA2	1
GO:0098973	structural constituent of postsynaptic actin cytoskeleton	1/262	5/18352	0.06938	0.226165	0.183295	ACTBL2	1
GO:0030276	clathrin binding	3/262	67/18352	0.0708161	0.229721	0.186176	LDLR/DAB2/DNER	3
GO:0042277	peptide binding	8/262	308/18352	0.0751972	0.242748	0.196735	NFKBIA/NPR3/INHBA/LDLR/TLR2/CACNA1A/ITGA2/HLA-F	8
GO:0019239	deaminase activity	2/262	32/18352	0.0761273	0.244563	0.198206	LACC1/APOBEC3G	2
GO:0004521	endoribonuclease activity	3/262	70/18352	0.0784964	0.248419	0.20133	ZC3H12C/ZC3H12A/ERN1	3
GO:0001530	lipopolysaccharide binding	2/262	33/18352	0.0803004	0.248419	0.20133	P2RX7/TLR2	2
GO:0004843	thiol-dependent ubiquitin-specific protease activity	4/262	115/18352	0.0826644	0.248419	0.20133	CYLD/TNFAIP3/ZC3H12A/USP54	4
GO:0101005	ubiquitinyl hydrolase activity	4/262	115/18352	0.0826644	0.248419	0.20133	CYLD/TNFAIP3/ZC3H12A/USP54	4
GO:0004064	arylesterase activity	1/262	6/18352	0.0826695	0.248419	0.20133	CA2	1
GO:0004645	1,4-alpha-oligoglucan phosphorylase activity	1/262	6/18352	0.0826695	0.248419	0.20133	TYMP	1
GO:0004704	NF-kappaB-inducing kinase activity	1/262	6/18352	0.0826695	0.248419	0.20133	IKBKE	1
GO:0015189	L-lysine transmembrane transporter activity	1/262	6/18352	0.0826695	0.248419	0.20133	SLC7A2	1
GO:0031727	CCR2 chemokine receptor binding	1/262	6/18352	0.0826695	0.248419	0.20133	CCL2	1
GO:0031849	olfactory receptor binding	1/262	6/18352	0.0826695	0.248419	0.20133	RTP4	1
GO:0038064	collagen receptor activity	1/262	6/18352	0.0826695	0.248419	0.20133	ITGA2	1
GO:0043237	laminin-1 binding	1/262	6/18352	0.0826695	0.248419	0.20133	NTN4	1
GO:0061459	L-arginine transmembrane transporter activity	1/262	6/18352	0.0826695	0.248419	0.20133	SLC7A2	1
GO:1904929	coreceptor activity involved in Wnt signaling pathway, planar cell polarity pathway	1/262	6/18352	0.0826695	0.248419	0.20133	ROR1	1
GO:0046943	carboxylic acid transmembrane transporter activity	5/262	162/18352	0.0829308	0.248419	0.20133	SLC7A2/CEACAM1/SLC16A6/SLC16A12/SLC26A2	5
GO:0030971	receptor tyrosine kinase binding	3/262	72/18352	0.0838102	0.248975	0.201781	ANGPT2/DOCK4/IRS1	3
GO:0071813	lipoprotein particle binding	2/262	34/18352	0.084543	0.248975	0.201781	LDLR/THBS1	2
GO:0071814	protein-lipid complex binding	2/262	34/18352	0.084543	0.248975	0.201781	LDLR/THBS1	2
GO:0005342	organic acid transmembrane transporter activity	5/262	163/18352	0.084614	0.248975	0.201781	SLC7A2/CEACAM1/SLC16A6/SLC16A12/SLC26A2	5
GO:0004540	ribonuclease activity	4/262	118/18352	0.0888663	0.25889	0.209817	ZC3H12C/ZC3H12A/ISG20/ERN1	4
GO:0019003	GDP binding	3/262	74/18352	0.0892739	0.25889	0.209817	RALA/GBP1/RAB42	3
GO:0019207	kinase regulator activity	6/262	216/18352	0.0899108	0.25889	0.209817	WARS1/GREM1/GPRC5B/CXCL10/TRIB1/CCL5	6
GO:1902936	phosphatidylinositol bisphosphate binding	4/262	119/18352	0.0909823	0.25889	0.209817	PLEKHA4/KCNJ2/SDCBP2/MYO1B	4
GO:0004252	serine-type endopeptidase activity	5/262	169/18352	0.0950874	0.25889	0.209817	PLAT/PLAU/ADAM8/C1R/C1S	5
GO:0005201	extracellular matrix structural constituent	5/262	169/18352	0.0950874	0.25889	0.209817	LAMC2/TFPI2/THBS1/ABI3BP/LAMB3	5
GO:0016810	hydrolase activity, acting on carbon-nitrogen (but not peptide) bonds	4/262	121/18352	0.095286	0.25889	0.209817	HDAC9/GCH1/LACC1/APOBEC3G	4
GO:0004931	extracellularly ATP-gated cation channel activity	1/262	7/18352	0.0957699	0.25889	0.209817	P2RX7	1
GO:0005021	vascular endothelial growth factor-activated receptor activity	1/262	7/18352	0.0957699	0.25889	0.209817	KDR	1
GO:0005138	interleukin-6 receptor binding	1/262	7/18352	0.0957699	0.25889	0.209817	IL6	1
GO:0008142	oxysterol binding	1/262	7/18352	0.0957699	0.25889	0.209817	INSIG1	1
GO:0016015	morphogen activity	1/262	7/18352	0.0957699	0.25889	0.209817	GREM1	1
GO:0030274	LIM domain binding	1/262	7/18352	0.0957699	0.25889	0.209817	RIPK2	1
GO:0030297	transmembrane receptor protein tyrosine kinase activator activity	1/262	7/18352	0.0957699	0.25889	0.209817	GREM1	1
GO:0030619	U1 snRNA binding	1/262	7/18352	0.0957699	0.25889	0.209817	ISG20	1
GO:0031730	CCR5 chemokine receptor binding	1/262	7/18352	0.0957699	0.25889	0.209817	CCL5	1
GO:0033300	dehydroascorbic acid transmembrane transporter activity	1/262	7/18352	0.0957699	0.25889	0.209817	SLC2A6	1
GO:0042392	sphingosine-1-phosphate phosphatase activity	1/262	7/18352	0.0957699	0.25889	0.209817	PLPP3	1
GO:0070573	metallodipeptidase activity	1/262	7/18352	0.0957699	0.25889	0.209817	CNDP2	1
GO:0098634	cell-matrix adhesion mediator activity	1/262	7/18352	0.0957699	0.25889	0.209817	ITGA2	1
GO:0004857	enzyme inhibitor activity	9/262	383/18352	0.0991715	0.267	0.21639	BIRC3/FRY/TFPI2/C3/SERPINE2/WARS1/TNFAIP8/TIMP4/TRIB1	9
GO:0046332	SMAD binding	3/262	79/18352	0.103559	0.274921	0.222809	SMAD6/HMGA2/DAB2	3
GO:0140098	catalytic activity, acting on RNA	9/262	390/18352	0.107657	0.274921	0.222809	DDX58/DHX58/IFIH1/WARS1/ZC3H12C/ZC3H12A/ISG20/ERN1/DDX60L	9
GO:0001227	DNA-binding transcription repressor activity, RNA polymerase II-specific	8/262	335/18352	0.1082	0.274921	0.222809	ETV7/NFKB1/ZBTB16/BHLHE40/JDP2/HMGA2/BCL6B/MSX1	8
GO:0003680	minor groove of adenine-thymine-rich DNA binding	1/262	8/18352	0.108684	0.274921	0.222809	HMGA2	1
GO:0004706	JUN kinase kinase kinase activity	1/262	8/18352	0.108684	0.274921	0.222809	RIPK2	1
GO:0008430	selenium binding	1/262	8/18352	0.108684	0.274921	0.222809	DIO2	1
GO:0016936	galactoside binding	1/262	8/18352	0.108684	0.274921	0.222809	LGALS9	1
GO:0030881	beta-2-microglobulin binding	1/262	8/18352	0.108684	0.274921	0.222809	HLA-F	1
GO:0031731	CCR6 chemokine receptor binding	1/262	8/18352	0.108684	0.274921	0.222809	CCL20	1
GO:0032050	clathrin heavy chain binding	1/262	8/18352	0.108684	0.274921	0.222809	LDLR	1
GO:0035381	ATP-gated ion channel activity	1/262	8/18352	0.108684	0.274921	0.222809	P2RX7	1
GO:0036435	K48-linked polyubiquitin modification-dependent protein binding	1/262	8/18352	0.108684	0.274921	0.222809	IKBKE	1
GO:0046977	TAP binding	1/262	8/18352	0.108684	0.274921	0.222809	HLA-F	1
GO:0047499	calcium-independent phospholipase A2 activity	1/262	8/18352	0.108684	0.274921	0.222809	PLA2G4C	1
GO:0047844	deoxycytidine deaminase activity	1/262	8/18352	0.108684	0.274921	0.222809	APOBEC3G	1
GO:0031072	heat shock protein binding	4/262	127/18352	0.108757	0.274921	0.222809	SLC12A2/GBP1/KDR/ERN1	4
GO:0035258	steroid hormone receptor binding	3/262	81/18352	0.109511	0.274921	0.222809	NR4A2/NKX3-1/ARID5A	3
GO:0001217	DNA-binding transcription repressor activity	8/262	336/18352	0.109555	0.274921	0.222809	ETV7/NFKB1/ZBTB16/BHLHE40/JDP2/HMGA2/BCL6B/MSX1	8
GO:0008242	omega peptidase activity	4/262	128/18352	0.111082	0.277211	0.224664	CYLD/TNFAIP3/ZC3H12A/USP54	4
GO:0004532	exoribonuclease activity	2/262	40/18352	0.111301	0.277211	0.224664	ZC3H12A/ISG20	2
GO:0030295	protein kinase activator activity	3/262	82/18352	0.112536	0.27924	0.22631	GREM1/GPRC5B/CCL5	3
GO:1901981	phosphatidylinositol phosphate binding	5/262	179/18352	0.11393	0.281649	0.228262	PLEKHA4/KCNJ2/SDCBP2/MYO1B/PHLDA1	5
GO:0016298	lipase activity	4/262	130/18352	0.115797	0.285204	0.231143	LIPG/PLA2G4C/PLA1A/CCL5	4
GO:0008514	organic anion transmembrane transporter activity	6/262	233/18352	0.117533	0.288241	0.233604	SLC7A2/CEACAM1/SLC16A6/SLC16A12/SLC26A2/SLC2A6	6
GO:0030331	estrogen receptor binding	2/262	42/18352	0.120655	0.288241	0.233604	NKX3-1/ARID5A	2
GO:0008297	single-stranded DNA exodeoxyribonuclease activity	1/262	9/18352	0.121414	0.288241	0.233604	ISG20	1
GO:0015181	arginine transmembrane transporter activity	1/262	9/18352	0.121414	0.288241	0.233604	SLC7A2	1
GO:0015379	potassium:chloride symporter activity	1/262	9/18352	0.121414	0.288241	0.233604	SLC12A2	1
GO:0019966	interleukin-1 binding	1/262	9/18352	0.121414	0.288241	0.233604	IL1RN	1
GO:0034713	type I transforming growth factor beta receptor binding	1/262	9/18352	0.121414	0.288241	0.233604	SMAD6	1
GO:0043184	vascular endothelial growth factor receptor 2 binding	1/262	9/18352	0.121414	0.288241	0.233604	GREM1	1
GO:0043208	glycosphingolipid binding	1/262	9/18352	0.121414	0.288241	0.233604	LYN	1
GO:0071936	coreceptor activity involved in Wnt signaling pathway	1/262	9/18352	0.121414	0.288241	0.233604	ROR1	1
GO:0051219	phosphoprotein binding	3/262	85/18352	0.121798	0.288241	0.233604	PLAT/IRS1/LYN	3
GO:0140297	DNA-binding transcription factor binding	8/262	347/18352	0.125071	0.294937	0.239031	HDAC9/NFKBIA/BHLHE40/OASL/NR4A2/NKX3-1/ATOH8/ARID5A	8
GO:0019887	protein kinase regulator activity	5/262	185/18352	0.126032	0.296154	0.240017	GREM1/GPRC5B/CXCL10/TRIB1/CCL5	5
GO:0004713	protein tyrosine kinase activity	4/262	135/18352	0.127959	0.299623	0.242829	RIPK2/JAK3/KDR/LYN	4
GO:0008236	serine-type peptidase activity	5/262	187/18352	0.130193	0.300965	0.243916	PLAT/PLAU/ADAM8/C1R/C1S	5
GO:0008330	protein tyrosine/threonine phosphatase activity	1/262	10/18352	0.133963	0.300965	0.243916	DUSP4	1
GO:0008331	high voltage-gated calcium channel activity	1/262	10/18352	0.133963	0.300965	0.243916	CACNA1A	1
GO:0008519	ammonium transmembrane transporter activity	1/262	10/18352	0.133963	0.300965	0.243916	SLC12A2	1
GO:0008603	cAMP-dependent protein kinase regulator activity	1/262	10/18352	0.133963	0.300965	0.243916	CXCL10	1
GO:0019531	oxalate transmembrane transporter activity	1/262	10/18352	0.133963	0.300965	0.243916	SLC26A2	1
GO:0031078	histone deacetylase activity (H3-K14 specific)	1/262	10/18352	0.133963	0.300965	0.243916	HDAC9	1
GO:0032041	NAD-dependent histone deacetylase activity (H3-K14 specific)	1/262	10/18352	0.133963	0.300965	0.243916	HDAC9	1
GO:0034511	U3 snoRNA binding	1/262	10/18352	0.133963	0.300965	0.243916	ISG20	1
GO:0052740	1-acyl-2-lysophosphatidylserine acylhydrolase activity	1/262	10/18352	0.133963	0.300965	0.243916	LIPG	1
GO:0071723	lipopeptide binding	1/262	10/18352	0.133963	0.300965	0.243916	TLR2	1
GO:0102545	phosphatidyl phospholipase B activity	1/262	10/18352	0.133963	0.300965	0.243916	PLA2G4C	1
GO:0019209	kinase activator activity	3/262	89/18352	0.134563	0.301294	0.244183	GREM1/GPRC5B/CCL5	3
GO:0003727	single-stranded RNA binding	3/262	90/18352	0.137824	0.30756	0.249261	DDX58/DHX58/IFIH1	3
GO:0017171	serine hydrolase activity	5/262	191/18352	0.1387	0.30848	0.250007	PLAT/PLAU/ADAM8/C1R/C1S	5
GO:0008296	3'-5'-exodeoxyribonuclease activity	1/262	11/18352	0.146334	0.321162	0.260285	ISG20	1
GO:0015378	sodium:chloride symporter activity	1/262	11/18352	0.146334	0.321162	0.260285	SLC12A2	1
GO:0016857	racemase and epimerase activity, acting on carbohydrates and derivatives	1/262	11/18352	0.146334	0.321162	0.260285	DSE	1
GO:0031996	thioesterase binding	1/262	11/18352	0.146334	0.321162	0.260285	TRAF1	1
GO:0052689	carboxylic ester hydrolase activity	4/262	143/18352	0.148466	0.324769	0.263208	LIPG/CA2/PLA2G4C/PLA1A	4
GO:0035257	nuclear hormone receptor binding	4/262	144/18352	0.151114	0.329479	0.267025	OASL/NR4A2/NKX3-1/ARID5A	4
GO:0004000	adenosine deaminase activity	1/262	12/18352	0.158529	0.33681	0.272967	LACC1	1
GO:0004126	cytidine deaminase activity	1/262	12/18352	0.158529	0.33681	0.272967	APOBEC3G	1
GO:0016004	phospholipase activator activity	1/262	12/18352	0.158529	0.33681	0.272967	CCL5	1
GO:0035325	Toll-like receptor binding	1/262	12/18352	0.158529	0.33681	0.272967	TLR2	1
GO:0046790	virion binding	1/262	12/18352	0.158529	0.33681	0.272967	PTX3	1
GO:0070410	co-SMAD binding	1/262	12/18352	0.158529	0.33681	0.272967	SMAD6	1
GO:0089720	caspase binding	1/262	12/18352	0.158529	0.33681	0.272967	RIPK2	1
GO:0099186	structural constituent of postsynapse	1/262	12/18352	0.158529	0.33681	0.272967	ACTBL2	1
GO:0017046	peptide hormone binding	2/262	51/18352	0.164789	0.345779	0.280236	NPR3/INHBA	2
GO:0098632	cell-cell adhesion mediator activity	2/262	51/18352	0.164789	0.345779	0.280236	DSP/CD47	2
GO:0004879	nuclear receptor activity	2/262	52/18352	0.169857	0.345779	0.280236	NR4A2/NKX3-1	2
GO:0098531	ligand-activated transcription factor activity	2/262	52/18352	0.169857	0.345779	0.280236	NR4A2/NKX3-1	2
GO:0003906	DNA-(apurinic or apyrimidinic site) endonuclease activity	1/262	13/18352	0.17055	0.345779	0.280236	HMGA2	1
GO:0005041	low-density lipoprotein particle receptor activity	1/262	13/18352	0.17055	0.345779	0.280236	LDLR	1
GO:0005068	transmembrane receptor protein tyrosine kinase adaptor activity	1/262	13/18352	0.17055	0.345779	0.280236	IRS1	1
GO:0008195	phosphatidate phosphatase activity	1/262	13/18352	0.17055	0.345779	0.280236	PLPP3	1
GO:0008271	secondary active sulfate transmembrane transporter activity	1/262	13/18352	0.17055	0.345779	0.280236	SLC26A2	1
GO:0015271	outward rectifier potassium channel activity	1/262	13/18352	0.17055	0.345779	0.280236	KCNT2	1
GO:0017017	MAP kinase tyrosine/serine/threonine phosphatase activity	1/262	13/18352	0.17055	0.345779	0.280236	DUSP4	1
GO:0031404	chloride ion binding	1/262	13/18352	0.17055	0.345779	0.280236	NPR3	1
GO:0031434	mitogen-activated protein kinase kinase binding	1/262	13/18352	0.17055	0.345779	0.280236	TRIB1	1
GO:0036122	BMP binding	1/262	13/18352	0.17055	0.345779	0.280236	GREM1	1
GO:0070700	BMP receptor binding	1/262	13/18352	0.17055	0.345779	0.280236	GDF15	1
GO:0016922	nuclear receptor binding	3/262	101/18352	0.175334	0.354119	0.286995	NR4A2/NKX3-1/ARID5A	3
GO:0140030	modification-dependent protein binding	4/262	153/18352	0.175728	0.354119	0.286995	TNFAIP3/TNIP1/LYN/IKBKE	4
GO:0033218	amide binding	8/262	381/18352	0.179695	0.355706	0.288281	NFKBIA/NPR3/INHBA/LDLR/TLR2/CACNA1A/ITGA2/HLA-F	8
GO:0005544	calcium-dependent phospholipid binding	2/262	54/18352	0.18007	0.355706	0.288281	PLA2G4C/DYSF	2
GO:0001222	transcription corepressor binding	1/262	14/18352	0.1824	0.355706	0.288281	PER1	1
GO:0005172	vascular endothelial growth factor receptor binding	1/262	14/18352	0.1824	0.355706	0.288281	GREM1	1
GO:0015373	anion:sodium symporter activity	1/262	14/18352	0.1824	0.355706	0.288281	SLC12A2	1
GO:0033549	MAP kinase phosphatase activity	1/262	14/18352	0.1824	0.355706	0.288281	DUSP4	1
GO:0035497	cAMP response element binding	1/262	14/18352	0.1824	0.355706	0.288281	HMGA2	1
GO:0042577	lipid phosphatase activity	1/262	14/18352	0.1824	0.355706	0.288281	PLPP3	1
GO:0060229	lipase activator activity	1/262	14/18352	0.1824	0.355706	0.288281	CCL5	1
GO:0070411	I-SMAD binding	1/262	14/18352	0.1824	0.355706	0.288281	SMAD6	1
GO:1990756	ubiquitin ligase-substrate adaptor activity	1/262	14/18352	0.1824	0.355706	0.288281	SPSB1	1
GO:0030246	carbohydrate binding	6/262	267/18352	0.183599	0.355958	0.288485	SELE/CD93/GALNT15/PTX3/CLEC4E/LGALS9	6
GO:0061629	RNA polymerase II-specific DNA-binding transcription factor binding	6/262	267/18352	0.183599	0.355958	0.288485	NFKBIA/BHLHE40/OASL/NR4A2/NKX3-1/ARID5A	6
GO:0015079	potassium ion transmembrane transporter activity	4/262	156/18352	0.184222	0.356128	0.288623	SLC12A2/KCNJ2/KCNK15/KCNT2	4
GO:0008144	drug binding	3/262	104/18352	0.186021	0.358562	0.290595	NAMPT/HMGCS1/MT2A	3
GO:0004089	carbonate dehydratase activity	1/262	15/18352	0.194081	0.364587	0.295478	CA2	1
GO:0016805	dipeptidase activity	1/262	15/18352	0.194081	0.364587	0.295478	CNDP2	1
GO:0017136	NAD-dependent histone deacetylase activity	1/262	15/18352	0.194081	0.364587	0.295478	HDAC9	1
GO:0035259	glucocorticoid receptor binding	1/262	15/18352	0.194081	0.364587	0.295478	NR4A2	1
GO:0042813	Wnt-activated receptor activity	1/262	15/18352	0.194081	0.364587	0.295478	ROR1	1
GO:0043274	phospholipase binding	1/262	15/18352	0.194081	0.364587	0.295478	SELE	1
GO:0048185	activin binding	1/262	15/18352	0.194081	0.364587	0.295478	FST	1
GO:0070742	C2H2 zinc finger domain binding	1/262	15/18352	0.194081	0.364587	0.295478	HMGA2	1
GO:0086008	voltage-gated potassium channel activity involved in cardiac muscle cell action potential repolarization	1/262	15/18352	0.194081	0.364587	0.295478	KCNJ2	1
GO:0004386	helicase activity	4/262	160/18352	0.195752	0.36669	0.297183	DDX58/DHX58/IFIH1/DDX60L	4
GO:0001786	phosphatidylserine binding	2/262	58/18352	0.200753	0.371188	0.300828	THBS1/CAVIN2	2
GO:0003953	NAD+ nucleosidase activity	1/262	16/18352	0.205596	0.371188	0.300828	TLR2	1
GO:0005159	insulin-like growth factor receptor binding	1/262	16/18352	0.205596	0.371188	0.300828	IRS1	1
GO:0005523	tropomyosin binding	1/262	16/18352	0.205596	0.371188	0.300828	NEBL	1
GO:0008191	metalloendopeptidase inhibitor activity	1/262	16/18352	0.205596	0.371188	0.300828	TIMP4	1
GO:0022841	potassium ion leak channel activity	1/262	16/18352	0.205596	0.371188	0.300828	KCNK15	1
GO:0030228	lipoprotein particle receptor activity	1/262	16/18352	0.205596	0.371188	0.300828	LDLR	1
GO:0034979	NAD-dependent protein deacetylase activity	1/262	16/18352	0.205596	0.371188	0.300828	HDAC9	1
GO:0035615	clathrin adaptor activity	1/262	16/18352	0.205596	0.371188	0.300828	DAB2	1
GO:0047498	calcium-dependent phospholipase A2 activity	1/262	16/18352	0.205596	0.371188	0.300828	PLA2G4C	1
GO:0050135	NAD(P)+ nucleosidase activity	1/262	16/18352	0.205596	0.371188	0.300828	TLR2	1
GO:0050700	CARD domain binding	1/262	16/18352	0.205596	0.371188	0.300828	RIPK2	1
GO:0061809	NAD+ nucleotidase, cyclic ADP-ribose generating	1/262	16/18352	0.205596	0.371188	0.300828	TLR2	1
GO:0004869	cysteine-type endopeptidase inhibitor activity	2/262	59/18352	0.205967	0.371188	0.300828	BIRC3/TNFAIP8	2
GO:0005507	copper ion binding	2/262	60/18352	0.211196	0.378894	0.307073	IL1A/LACC1	2
GO:0005001	transmembrane receptor protein tyrosine phosphatase activity	1/262	17/18352	0.216947	0.378894	0.307073	PTPRB	1
GO:0008656	cysteine-type endopeptidase activator activity involved in apoptotic process	1/262	17/18352	0.216947	0.378894	0.307073	NKX3-1	1
GO:0015116	sulfate transmembrane transporter activity	1/262	17/18352	0.216947	0.378894	0.307073	SLC26A2	1
GO:0015174	basic amino acid transmembrane transporter activity	1/262	17/18352	0.216947	0.378894	0.307073	SLC7A2	1
GO:0015377	cation:chloride symporter activity	1/262	17/18352	0.216947	0.378894	0.307073	SLC12A2	1
GO:0016854	racemase and epimerase activity	1/262	17/18352	0.216947	0.378894	0.307073	DSE	1
GO:0019198	transmembrane receptor protein phosphatase activity	1/262	17/18352	0.216947	0.378894	0.307073	PTPRB	1
GO:0070628	proteasome binding	1/262	17/18352	0.216947	0.378894	0.307073	ID1	1
GO:0140312	cargo adaptor activity	1/262	17/18352	0.216947	0.378894	0.307073	DAB2	1
GO:1990380	Lys48-specific deubiquitinase activity	1/262	17/18352	0.216947	0.378894	0.307073	CYLD	1
GO:0043177	organic acid binding	5/262	224/18352	0.21708	0.378894	0.307073	SELE/CD44/HMGCS1/TNFAIP6/HAPLN3	5
GO:0005088	Ras guanyl-nucleotide exchange factor activity	3/262	115/18352	0.226505	0.391007	0.316891	RASGRF2/DOCK4/RAPGEF5	3
GO:0008301	DNA binding, bending	1/262	18/18352	0.228136	0.391007	0.316891	HMGA2	1
GO:0035613	RNA stem-loop binding	1/262	18/18352	0.228136	0.391007	0.316891	ZC3H12A	1
GO:0042834	peptidoglycan binding	1/262	18/18352	0.228136	0.391007	0.316891	TLR2	1
GO:0055106	ubiquitin-protein transferase regulator activity	1/262	18/18352	0.228136	0.391007	0.316891	TRIB1	1
GO:0070064	proline-rich region binding	1/262	18/18352	0.228136	0.391007	0.316891	CYLD	1
GO:0098918	structural constituent of synapse	1/262	18/18352	0.228136	0.391007	0.316891	ACTBL2	1
GO:0008235	metalloexopeptidase activity	2/262	64/18352	0.232229	0.396999	0.321747	LAP3/CNDP2	2
GO:0004653	polypeptide N-acetylgalactosaminyltransferase activity	1/262	19/18352	0.239167	0.40367	0.327153	GALNT15	1
GO:0015125	bile acid transmembrane transporter activity	1/262	19/18352	0.239167	0.40367	0.327153	CEACAM1	1
GO:0022840	leak channel activity	1/262	19/18352	0.239167	0.40367	0.327153	KCNK15	1
GO:0022842	narrow pore channel activity	1/262	19/18352	0.239167	0.40367	0.327153	KCNK15	1
GO:0030676	Rac guanyl-nucleotide exchange factor activity	1/262	19/18352	0.239167	0.40367	0.327153	DOCK4	1
GO:0005267	potassium channel activity	3/262	120/18352	0.245439	0.413207	0.334882	KCNJ2/KCNK15/KCNT2	3
GO:0051427	hormone receptor binding	4/262	177/18352	0.246942	0.414688	0.336083	OASL/NR4A2/NKX3-1/ARID5A	4
GO:0008509	anion transmembrane transporter activity	7/262	357/18352	0.24975	0.416733	0.33774	SLC7A2/SLC12A2/CEACAM1/SLC16A6/SLC16A12/SLC26A2/SLC2A6	7
GO:0016505	peptidase activator activity involved in apoptotic process	1/262	20/18352	0.25004	0.416733	0.33774	NKX3-1	1
GO:0072349	modified amino acid transmembrane transporter activity	1/262	20/18352	0.25004	0.416733	0.33774	SLC16A12	1
GO:0005179	hormone activity	3/262	122/18352	0.253083	0.42075	0.340996	STC2/INHBA/APLN	3
GO:0019210	kinase inhibitor activity	2/262	69/18352	0.258682	0.426055	0.345295	WARS1/TRIB1	2
GO:0001614	purinergic nucleotide receptor activity	1/262	21/18352	0.260758	0.426055	0.345295	P2RX7	1
GO:0005355	glucose transmembrane transporter activity	1/262	21/18352	0.260758	0.426055	0.345295	SLC2A6	1
GO:0015106	bicarbonate transmembrane transporter activity	1/262	21/18352	0.260758	0.426055	0.345295	SLC26A2	1
GO:0015149	hexose transmembrane transporter activity	1/262	21/18352	0.260758	0.426055	0.345295	SLC2A6	1
GO:0016502	nucleotide receptor activity	1/262	21/18352	0.260758	0.426055	0.345295	P2RX7	1
GO:0070530	K63-linked polyubiquitin modification-dependent protein binding	1/262	21/18352	0.260758	0.426055	0.345295	TNFAIP3	1
GO:0004529	exodeoxyribonuclease activity	1/262	22/18352	0.271324	0.437938	0.354926	ISG20	1
GO:0005242	inward rectifier potassium channel activity	1/262	22/18352	0.271324	0.437938	0.354926	KCNJ2	1
GO:0015296	anion:cation symporter activity	1/262	22/18352	0.271324	0.437938	0.354926	SLC12A2	1
GO:0016895	exodeoxyribonuclease activity, producing 5'-phosphomonoesters	1/262	22/18352	0.271324	0.437938	0.354926	ISG20	1
GO:0033691	sialic acid binding	1/262	22/18352	0.271324	0.437938	0.354926	SELE	1
GO:0004519	endonuclease activity	3/262	127/18352	0.272332	0.438501	0.355382	ZC3H12C/ZC3H12A/ERN1	3
GO:0038024	cargo receptor activity	2/262	73/18352	0.279878	0.446087	0.36153	LDLR/DAB2	2
GO:0005158	insulin receptor binding	1/262	23/18352	0.281739	0.446087	0.36153	IRS1	1
GO:0015145	monosaccharide transmembrane transporter activity	1/262	23/18352	0.281739	0.446087	0.36153	SLC2A6	1
GO:0017134	fibroblast growth factor binding	1/262	23/18352	0.281739	0.446087	0.36153	THBS1	1
GO:0035250	UDP-galactosyltransferase activity	1/262	23/18352	0.281739	0.446087	0.36153	B4GALT1	1
GO:0050431	transforming growth factor beta binding	1/262	23/18352	0.281739	0.446087	0.36153	THBS1	1
GO:0070412	R-SMAD binding	1/262	23/18352	0.281739	0.446087	0.36153	SMAD6	1
GO:0004842	ubiquitin-protein transferase activity	8/262	435/18352	0.28323	0.447263	0.362483	BIRC3/TNFAIP3/TRIM22/TRIM47/HECW2/HERC6/NEURL3/NEURL1B	8
GO:0008022	protein C-terminus binding	4/262	189/18352	0.284669	0.447263	0.362483	ZBTB16/SDCBP2/ID1/DAB2	4
GO:0008237	metallopeptidase activity	4/262	189/18352	0.284669	0.447263	0.362483	LAP3/ADAMTS6/CNDP2/ADAM8	4
GO:0016835	carbon-oxygen lyase activity	2/262	74/18352	0.285173	0.447263	0.362483	CA2/HMGA2	2
GO:0017124	SH3 domain binding	3/262	131/18352	0.287844	0.450391	0.365018	SGIP1/DOCK4/LYN	3
GO:0004622	lysophospholipase activity	1/262	24/18352	0.292006	0.453702	0.367701	PLA2G4C	1
GO:0004709	MAP kinase kinase kinase activity	1/262	24/18352	0.292006	0.453702	0.367701	RIPK2	1
GO:0030898	actin-dependent ATPase activity	1/262	24/18352	0.292006	0.453702	0.367701	MYO1B	1
GO:0003714	transcription corepressor activity	4/262	194/18352	0.300644	0.461873	0.374323	HDAC9/TRIM22/BHLHE40/ARID5A	4
GO:0004407	histone deacetylase activity	1/262	25/18352	0.302127	0.461873	0.374323	HDAC9	1
GO:0005104	fibroblast growth factor receptor binding	1/262	25/18352	0.302127	0.461873	0.374323	FGF5	1
GO:0030247	polysaccharide binding	1/262	25/18352	0.302127	0.461873	0.374323	PTX3	1
GO:0046625	sphingolipid binding	1/262	25/18352	0.302127	0.461873	0.374323	LYN	1
GO:0051119	sugar transmembrane transporter activity	1/262	25/18352	0.302127	0.461873	0.374323	SLC2A6	1
GO:0051861	glycolipid binding	1/262	25/18352	0.302127	0.461873	0.374323	LYN	1
GO:0003707	steroid hormone receptor activity	1/262	26/18352	0.312104	0.470633	0.381423	NKX3-1	1
GO:0004435	phosphatidylinositol phospholipase C activity	1/262	26/18352	0.312104	0.470633	0.381423	CCL5	1
GO:0033558	protein deacetylase activity	1/262	26/18352	0.312104	0.470633	0.381423	HDAC9	1
GO:0035925	mRNA 3'-UTR AU-rich region binding	1/262	26/18352	0.312104	0.470633	0.381423	ZC3H12A	1
GO:0102567	phospholipase A2 activity (consuming 1,2-dipalmitoylphosphatidylcholine)	1/262	26/18352	0.312104	0.470633	0.381423	PLA2G4C	1
GO:0102568	phospholipase A2 activity consuming 1,2-dioleoylphosphatidylethanolamine)	1/262	26/18352	0.312104	0.470633	0.381423	PLA2G4C	1
GO:0033613	activating transcription factor binding	2/262	80/18352	0.316827	0.476674	0.386319	BHLHE40/ATOH8	2
GO:0035091	phosphatidylinositol binding	5/262	262/18352	0.31984	0.477351	0.386867	PLEKHA4/KCNJ2/SDCBP2/MYO1B/PHLDA1	5
GO:0005516	calmodulin binding	4/262	200/18352	0.319946	0.477351	0.386867	CEACAM1/RASGRF2/MYO1B/RRAD	4
GO:0008139	nuclear localization sequence binding	1/262	27/18352	0.321939	0.477351	0.386867	NFKBIA	1
GO:0008378	galactosyltransferase activity	1/262	27/18352	0.321939	0.477351	0.386867	B4GALT1	1
GO:0017091	AU-rich element binding	1/262	27/18352	0.321939	0.477351	0.386867	ZC3H12A	1
GO:0046875	ephrin receptor binding	1/262	27/18352	0.321939	0.477351	0.386867	LYN	1
GO:0022843	voltage-gated cation channel activity	3/262	140/18352	0.322945	0.477351	0.386867	KCNJ2/CACNA1A/KCNT2	3
GO:0008017	microtubule binding	5/262	265/18352	0.32826	0.477351	0.386867	NAV3/SGIP1/DYSF/BCL2L11/MX2	5
GO:0019787	ubiquitin-like protein transferase activity	8/262	457/18352	0.329369	0.477351	0.386867	BIRC3/TNFAIP3/TRIM22/TRIM47/HECW2/HERC6/NEURL3/NEURL1B	8
GO:0004129	cytochrome-c oxidase activity	1/262	28/18352	0.331633	0.477351	0.386867	C15orf48	1
GO:0004629	phospholipase C activity	1/262	28/18352	0.331633	0.477351	0.386867	CCL5	1
GO:0015002	heme-copper terminal oxidase activity	1/262	28/18352	0.331633	0.477351	0.386867	C15orf48	1
GO:0015301	anion:anion antiporter activity	1/262	28/18352	0.331633	0.477351	0.386867	SLC26A2	1
GO:0016676	oxidoreductase activity, acting on a heme group of donors, oxygen as acceptor	1/262	28/18352	0.331633	0.477351	0.386867	C15orf48	1
GO:0030507	spectrin binding	1/262	28/18352	0.331633	0.477351	0.386867	GBP1	1
GO:0035035	histone acetyltransferase binding	1/262	28/18352	0.331633	0.477351	0.386867	ETS1	1
GO:0043015	gamma-tubulin binding	1/262	28/18352	0.331633	0.477351	0.386867	LYN	1
GO:0050681	androgen receptor binding	1/262	28/18352	0.331633	0.477351	0.386867	ARID5A	1
GO:0080025	phosphatidylinositol-3,5-bisphosphate binding	1/262	28/18352	0.331633	0.477351	0.386867	PLEKHA4	1
GO:0140323	solute:anion antiporter activity	1/262	28/18352	0.331633	0.477351	0.386867	SLC26A2	1
GO:0004527	exonuclease activity	2/262	83/18352	0.332541	0.477624	0.387089	ZC3H12A/ISG20	2
GO:0015293	symporter activity	3/262	143/18352	0.334665	0.479638	0.388721	SLC12A2/SLC16A6/SLC16A12	3
GO:0042562	hormone binding	2/262	84/18352	0.337758	0.481722	0.39041	NPR3/INHBA	2
GO:0051015	actin filament binding	4/262	206/18352	0.339342	0.481722	0.39041	NEBL/MYO1B/PSTPIP2/ABLIM3	4
GO:0000146	microfilament motor activity	1/262	29/18352	0.341189	0.481722	0.39041	MYO1B	1
GO:0005520	insulin-like growth factor binding	1/262	29/18352	0.341189	0.481722	0.39041	ESM1	1
GO:0016675	oxidoreductase activity, acting on a heme group of donors	1/262	29/18352	0.341189	0.481722	0.39041	C15orf48	1
GO:0043425	bHLH transcription factor binding	1/262	29/18352	0.341189	0.481722	0.39041	BHLHE40	1
GO:0090482	vitamin transmembrane transporter activity	1/262	29/18352	0.341189	0.481722	0.39041	SLC2A6	1
GO:0008013	beta-catenin binding	2/262	85/18352	0.342961	0.483198	0.391606	NR4A2/SOX17	2
GO:0005231	excitatory extracellular ligand-gated ion channel activity	1/262	30/18352	0.35061	0.489823	0.396975	P2RX7	1
GO:0017147	Wnt-protein binding	1/262	30/18352	0.35061	0.489823	0.396975	ROR1	1
GO:0043325	phosphatidylinositol-3,4-bisphosphate binding	1/262	30/18352	0.35061	0.489823	0.396975	PLEKHA4	1
GO:0043548	phosphatidylinositol 3-kinase binding	1/262	30/18352	0.35061	0.489823	0.396975	IRS1	1
GO:0004518	nuclease activity	4/262	210/18352	0.352298	0.491149	0.398051	ZC3H12C/ZC3H12A/ISG20/ERN1	4
GO:0016757	transferase activity, transferring glycosyl groups	5/262	275/18352	0.356467	0.495509	0.401584	TYMP/B4GALT1/NAMPT/GALNT15/LACC1	5
GO:0019903	protein phosphatase binding	3/262	149/18352	0.358069	0.495509	0.401584	CEACAM1/JAK3/IKBKE	3
GO:0005249	voltage-gated potassium channel activity	2/262	88/18352	0.358492	0.495509	0.401584	KCNJ2/KCNT2	2
GO:0031406	carboxylic acid binding	4/262	212/18352	0.358778	0.495509	0.401584	SELE/CD44/TNFAIP6/HAPLN3	4
GO:0042605	peptide antigen binding	1/262	31/18352	0.359896	0.495509	0.401584	HLA-F	1
GO:0051059	NF-kappaB binding	1/262	31/18352	0.359896	0.495509	0.401584	NFKBIA	1
GO:0005085	guanyl-nucleotide exchange factor activity	4/262	215/18352	0.368496	0.502906	0.407579	RASGRF2/DOCK4/RAPGEF5/RPGR	4
GO:0072341	modified amino acid binding	2/262	90/18352	0.368772	0.502906	0.407579	THBS1/CAVIN2	2
GO:0030515	snoRNA binding	1/262	32/18352	0.36905	0.502906	0.407579	ISG20	1
GO:0031369	translation initiation factor binding	1/262	32/18352	0.36905	0.502906	0.407579	GCH1	1
GO:0071889	14-3-3 protein binding	1/262	32/18352	0.36905	0.502906	0.407579	HLA-F	1
GO:0004623	phospholipase A2 activity	1/262	33/18352	0.378073	0.511014	0.414149	PLA2G4C	1
GO:0035198	miRNA binding	1/262	33/18352	0.378073	0.511014	0.414149	ZC3H12A	1
GO:0071855	neuropeptide receptor binding	1/262	33/18352	0.378073	0.511014	0.414149	APLN	1
GO:0071949	FAD binding	1/262	33/18352	0.378073	0.511014	0.414149	SQLE	1
GO:0000217	DNA secondary structure binding	1/262	34/18352	0.386968	0.520918	0.422177	HMGA2	1
GO:0016799	hydrolase activity, hydrolyzing N-glycosyl compounds	1/262	34/18352	0.386968	0.520918	0.422177	TLR2	1
GO:0008238	exopeptidase activity	2/262	95/18352	0.394178	0.529553	0.429175	LAP3/CNDP2	2
GO:0016831	carboxy-lyase activity	1/262	35/18352	0.395736	0.530574	0.430002	ODC1	1
GO:0004896	cytokine receptor activity	2/262	97/18352	0.404212	0.538061	0.43607	CD44/IL7R	2
GO:0000175	3'-5'-exoribonuclease activity	1/262	36/18352	0.404379	0.538061	0.43607	ISG20	1
GO:0042805	actinin binding	1/262	36/18352	0.404379	0.538061	0.43607	NFKB1	1
GO:0061630	ubiquitin protein ligase activity	5/262	292/18352	0.404557	0.538061	0.43607	BIRC3/TRIM22/HECW2/NEURL3/NEURL1B	5
GO:0004867	serine-type endopeptidase inhibitor activity	2/262	98/18352	0.409199	0.543149	0.440193	TFPI2/SERPINE2	2
GO:0015144	carbohydrate transmembrane transporter activity	1/262	37/18352	0.412899	0.546968	0.443289	SLC2A6	1
GO:0016896	exoribonuclease activity, producing 5'-phosphomonoesters	1/262	38/18352	0.421298	0.554072	0.449046	ISG20	1
GO:0043014	alpha-tubulin binding	1/262	38/18352	0.421298	0.554072	0.449046	DYSF	1
GO:0043531	ADP binding	1/262	38/18352	0.421298	0.554072	0.449046	ERN1	1
GO:0015631	tubulin binding	6/262	365/18352	0.421594	0.554072	0.449046	NAV3/SGIP1/DYSF/BCL2L11/MX2/LYN	6
GO:0004725	protein tyrosine phosphatase activity	2/262	101/18352	0.424037	0.556182	0.450756	DUSP4/PTPRB	2
GO:0015108	chloride transmembrane transporter activity	2/262	102/18352	0.42894	0.559437	0.453394	SLC12A2/SLC26A2	2
GO:0005310	dicarboxylic acid transmembrane transporter activity	1/262	39/18352	0.429577	0.559437	0.453394	SLC26A2	1
GO:0005547	phosphatidylinositol-3,4,5-trisphosphate binding	1/262	39/18352	0.429577	0.559437	0.453394	MYO1B	1
GO:0061659	ubiquitin-like protein ligase activity	5/262	301/18352	0.429883	0.559437	0.453394	BIRC3/TRIM22/HECW2/NEURL3/NEURL1B	5
GO:0015291	secondary active transmembrane transporter activity	4/262	236/18352	0.43599	0.566277	0.458937	SLC12A2/SLC16A6/SLC16A12/SLC26A2	4
GO:0016504	peptidase activator activity	1/262	40/18352	0.437738	0.566334	0.458984	NKX3-1	1
GO:0031492	nucleosomal DNA binding	1/262	40/18352	0.437738	0.566334	0.458984	HMGA2	1
GO:0005200	structural constituent of cytoskeleton	2/262	104/18352	0.43868	0.566451	0.459079	DSP/ACTBL2	2
GO:0004175	endopeptidase activity	7/262	440/18352	0.439671	0.56663	0.459224	ADAMTS6/PLAT/PLAU/ADAM8/C1R/CTSS/C1S	7
GO:0004812	aminoacyl-tRNA ligase activity	1/262	41/18352	0.445782	0.568993	0.461139	WARS1	1
GO:0016875	ligase activity, forming carbon-oxygen bonds	1/262	41/18352	0.445782	0.568993	0.461139	WARS1	1
GO:0019213	deacetylase activity	1/262	41/18352	0.445782	0.568993	0.461139	HDAC9	1
GO:0030159	signaling receptor complex adaptor activity	1/262	41/18352	0.445782	0.568993	0.461139	IRS1	1
GO:0042169	SH2 domain binding	1/262	41/18352	0.445782	0.568993	0.461139	IRS1	1
GO:0031490	chromatin DNA binding	2/262	106/18352	0.448329	0.571147	0.462885	HMGA2/PER1	2
GO:0001784	phosphotyrosine residue binding	1/262	42/18352	0.453712	0.57361	0.46488	IRS1	1
GO:0022839	ion gated channel activity	1/262	42/18352	0.453712	0.57361	0.46488	KCNT2	1
GO:0030544	Hsp70 protein binding	1/262	42/18352	0.453712	0.57361	0.46488	ERN1	1
GO:1901682	sulfur compound transmembrane transporter activity	1/262	42/18352	0.453712	0.57361	0.46488	SLC26A2	1
GO:0004222	metalloendopeptidase activity	2/262	108/18352	0.457885	0.576692	0.467378	ADAMTS6/ADAM8	2
GO:0099094	ligand-gated cation channel activity	2/262	108/18352	0.457885	0.576692	0.467378	P2RX7/KCNJ2	2
GO:0030674	protein-macromolecule adaptor activity	4/262	244/18352	0.461223	0.577998	0.468437	TRIM22/DAB2/IRS1/SPSB1	4
GO:0004180	carboxypeptidase activity	1/262	43/18352	0.461529	0.577998	0.468437	CNDP2	1
GO:0008307	structural constituent of muscle	1/262	43/18352	0.461529	0.577998	0.468437	NEBL	1
GO:0005245	voltage-gated calcium channel activity	1/262	44/18352	0.469235	0.586543	0.475362	CACNA1A	1
GO:0008138	protein tyrosine/serine/threonine phosphatase activity	1/262	45/18352	0.47683	0.592696	0.480348	DUSP4	1
GO:0016709	oxidoreductase activity, acting on paired donors, with incorporation or reduction of molecular oxygen, NAD(P)H as one donor, and incorporation of one atom of oxygen	1/262	45/18352	0.47683	0.592696	0.480348	SQLE	1
GO:0061980	regulatory RNA binding	1/262	45/18352	0.47683	0.592696	0.480348	ZC3H12A	1
GO:0004177	aminopeptidase activity	1/262	46/18352	0.484318	0.600879	0.486981	LAP3	1
GO:0000149	SNARE binding	2/262	115/18352	0.490559	0.604398	0.489833	CACNA1A/TNFAIP2	2
GO:0042826	histone deacetylase binding	2/262	115/18352	0.490559	0.604398	0.489833	HDAC9/NKX3-1	2
GO:0001102	RNA polymerase II activating transcription factor binding	1/262	47/18352	0.491698	0.604398	0.489833	BHLHE40	1
GO:0005246	calcium channel regulator activity	1/262	47/18352	0.491698	0.604398	0.489833	RRAD	1
GO:0008376	acetylgalactosaminyltransferase activity	1/262	47/18352	0.491698	0.604398	0.489833	GALNT15	1
GO:0015026	coreceptor activity	1/262	48/18352	0.498973	0.609958	0.494339	ROR1	1
GO:0032266	phosphatidylinositol-3-phosphate binding	1/262	48/18352	0.498973	0.609958	0.494339	PLEKHA4	1
GO:1901618	organic hydroxy compound transmembrane transporter activity	1/262	48/18352	0.498973	0.609958	0.494339	CEACAM1	1
GO:0005048	signal sequence binding	1/262	49/18352	0.506145	0.61759	0.500524	NFKBIA	1
GO:0016829	lyase activity	3/262	189/18352	0.508048	0.618776	0.501485	CA2/ODC1/HMGA2	3
GO:0008374	O-acyltransferase activity	1/262	50/18352	0.513214	0.623926	0.505659	PLA2G4C	1
GO:0001221	transcription cofactor binding	1/262	51/18352	0.520183	0.629024	0.509791	PER1	1
GO:0016830	carbon-carbon lyase activity	1/262	51/18352	0.520183	0.629024	0.509791	ODC1	1
GO:0005261	cation channel activity	5/262	334/18352	0.520246	0.629024	0.509791	P2RX7/KCNJ2/KCNK15/CACNA1A/KCNT2	5
GO:0019902	phosphatase binding	3/262	194/18352	0.525576	0.634315	0.514079	CEACAM1/JAK3/IKBKE	3
GO:0008146	sulfotransferase activity	1/262	52/18352	0.527052	0.634945	0.514589	WSCD1	1
GO:0045309	protein phosphorylated amino acid binding	1/262	53/18352	0.533823	0.641939	0.520258	IRS1	1
GO:0005244	voltage-gated ion channel activity	3/262	197/18352	0.535927	0.642146	0.520426	KCNJ2/CACNA1A/KCNT2	3
GO:0022832	voltage-gated channel activity	3/262	197/18352	0.535927	0.642146	0.520426	KCNJ2/CACNA1A/KCNT2	3
GO:0017069	snRNA binding	1/262	54/18352	0.540498	0.646459	0.523921	ISG20	1
GO:0022804	active transmembrane transporter activity	5/262	344/18352	0.546464	0.652421	0.528752	SLC12A2/SLC16A6/SLC16A12/SLC26A2/ABCA3	5
GO:0016758	transferase activity, transferring hexosyl groups	3/262	201/18352	0.549528	0.654903	0.530764	TYMP/B4GALT1/GALNT15	3
GO:0008408	3'-5' exonuclease activity	1/262	56/18352	0.553563	0.658532	0.533705	ISG20	1
GO:0043022	ribosome binding	1/262	57/18352	0.559956	0.664947	0.538905	ZC3H12A	1
GO:0016887	ATPase activity	6/262	423/18352	0.563665	0.668019	0.541394	DDX58/DHX58/IFIH1/MYO1B/ABCA3/DDX60L	6
GO:0044325	ion channel binding	2/262	132/18352	0.564551	0.668019	0.541394	TCAF2/LYN	2
GO:0016796	exonuclease activity, active with either ribo- or deoxyribonucleic acids and producing 5'-phosphomonoesters	1/262	58/18352	0.566258	0.668848	0.542066	ISG20	1
GO:0043021	ribonucleoprotein complex binding	2/262	133/18352	0.568657	0.669365	0.542485	IFIH1/ZC3H12A	2
GO:0004536	deoxyribonuclease activity	1/262	59/18352	0.572469	0.669365	0.542485	ISG20	1
GO:0015179	L-amino acid transmembrane transporter activity	1/262	59/18352	0.572469	0.669365	0.542485	SLC7A2	1
GO:0016836	hydro-lyase activity	1/262	59/18352	0.572469	0.669365	0.542485	CA2	1
GO:0032934	sterol binding	1/262	59/18352	0.572469	0.669365	0.542485	INSIG1	1
GO:0005319	lipid transporter activity	2/262	134/18352	0.572735	0.669365	0.542485	CEACAM1/ABCA3	2
GO:0140375	immune receptor activity	2/262	135/18352	0.576785	0.672665	0.545159	CD44/IL7R	2
GO:0005089	Rho guanyl-nucleotide exchange factor activity	1/262	60/18352	0.578593	0.672665	0.545159	DOCK4	1
GO:0097110	scaffold protein binding	1/262	60/18352	0.578593	0.672665	0.545159	DSP	1
GO:0004714	transmembrane receptor protein tyrosine kinase activity	1/262	61/18352	0.584629	0.678496	0.549885	KDR	1
GO:0015276	ligand-gated ion channel activity	2/262	139/18352	0.592704	0.685475	0.555541	P2RX7/KCNJ2	2
GO:0022834	ligand-gated channel activity	2/262	139/18352	0.592704	0.685475	0.555541	P2RX7/KCNJ2	2
GO:0003779	actin binding	6/262	437/18352	0.595531	0.687548	0.557222	NEBL/CEACAM1/GBP1/MYO1B/PSTPIP2/ABLIM3	6
GO:0004860	protein kinase inhibitor activity	1/262	65/18352	0.607923	0.700639	0.567831	TRIB1	1
GO:0008194	UDP-glycosyltransferase activity	2/262	144/18352	0.61197	0.704084	0.570623	B4GALT1/GALNT15	2
GO:0002039	p53 binding	1/262	66/18352	0.61354	0.704671	0.571098	MSX1	1
GO:0015103	inorganic anion transmembrane transporter activity	2/262	145/18352	0.61574	0.705977	0.572157	SLC12A2/SLC26A2	2
GO:0035591	signaling adaptor activity	1/262	68/18352	0.624536	0.71483	0.579332	IRS1	1
GO:0016811	hydrolase activity, acting on carbon-nitrogen (but not peptide) bonds, in linear amides	1/262	69/18352	0.629916	0.718515	0.582318	HDAC9	1
GO:0048029	monosaccharide binding	1/262	69/18352	0.629916	0.718515	0.582318	LGALS9	1
GO:0016782	transferase activity, transferring sulfur-containing groups	1/262	70/18352	0.635219	0.722087	0.585213	WSCD1	1
GO:0031491	nucleosome binding	1/262	70/18352	0.635219	0.722087	0.585213	HMGA2	1
GO:0015077	monovalent inorganic cation transmembrane transporter activity	5/262	381/18352	0.636971	0.722842	0.585825	SLC12A2/KCNJ2/KCNK15/KCNT2/C15orf48	5
GO:0015370	solute:sodium symporter activity	1/262	72/18352	0.6456	0.730143	0.591742	SLC12A2	1
GO:0017022	myosin binding	1/262	72/18352	0.6456	0.730143	0.591742	RALA	1
GO:0048365	Rac GTPase binding	1/262	73/18352	0.65068	0.734638	0.595385	DOCK4	1
GO:0016853	isomerase activity	2/262	156/18352	0.65536	0.73654	0.596927	DSE/HMGCS1	2
GO:0005230	extracellular ligand-gated ion channel activity	1/262	74/18352	0.655686	0.73654	0.596927	P2RX7	1
GO:0070491	repressing transcription factor binding	1/262	74/18352	0.655686	0.73654	0.596927	HDAC9	1
GO:0004722	protein serine/threonine phosphatase activity	1/262	75/18352	0.660622	0.740832	0.600405	DUSP4	1
GO:0060090	molecular adaptor activity	4/262	316/18352	0.663639	0.742963	0.602132	TRIM22/DAB2/IRS1/SPSB1	4
GO:0043130	ubiquitin binding	1/262	76/18352	0.665487	0.743779	0.602794	TNFAIP3	1
GO:0019905	syntaxin binding	1/262	78/18352	0.675009	0.752573	0.60992	CACNA1A	1
GO:0046982	protein heterodimerization activity	4/262	321/18352	0.675618	0.752573	0.60992	SDCBP2/IRAK2/BHLHE40/NR4A2	4
GO:0019199	transmembrane receptor protein kinase activity	1/262	80/18352	0.684262	0.760927	0.616691	KDR	1
GO:0050660	flavin adenine dinucleotide binding	1/262	81/18352	0.688789	0.764682	0.619735	SQLE	1
GO:0015171	amino acid transmembrane transporter activity	1/262	82/18352	0.693252	0.768354	0.62271	SLC7A2	1
GO:0003823	antigen binding	2/262	168/18352	0.694801	0.768789	0.623063	IL7R/HLA-F	2
GO:0015297	antiporter activity	1/262	83/18352	0.697651	0.770661	0.62458	SLC26A2	1
GO:0045296	cadherin binding	4/262	332/18352	0.700925	0.772883	0.626381	PTPRB/KDR/MYO1B/PHLDB2	4
GO:0008080	N-acetyltransferase activity	1/262	84/18352	0.701987	0.772883	0.626381	SAT1	1
GO:0030165	PDZ domain binding	1/262	85/18352	0.706261	0.776303	0.629153	DOCK4	1
GO:0016209	antioxidant activity	1/262	86/18352	0.710474	0.779645	0.631861	SOD2	1
GO:0022836	gated channel activity	4/262	337/18352	0.71195	0.779978	0.632131	P2RX7/KCNJ2/CACNA1A/KCNT2	4
GO:0016746	transferase activity, transferring acyl groups	3/262	259/18352	0.71826	0.783523	0.635004	PLA2G4C/HMGCS1/SAT1	3
GO:0003712	transcription coregulator activity	6/262	498/18352	0.718535	0.783523	0.635004	HDAC9/ID1/TRIM22/BHLHE40/SOX17/ARID5A	6
GO:0051117	ATPase binding	1/262	88/18352	0.71872	0.783523	0.635004	RALA	1
GO:0008081	phosphoric diester hydrolase activity	1/262	89/18352	0.722755	0.786632	0.637524	CCL5	1
GO:0004721	phosphoprotein phosphatase activity	2/262	179/18352	0.727619	0.790632	0.640765	DUSP4/PTPRB	2
GO:0046873	metal ion transmembrane transporter activity	5/262	428/18352	0.734592	0.796907	0.645851	SLC12A2/KCNJ2/KCNK15/CACNA1A/KCNT2	5
GO:0005216	ion channel activity	5/262	431/18352	0.740123	0.801599	0.649653	P2RX7/KCNJ2/KCNK15/CACNA1A/KCNT2	5
GO:0032182	ubiquitin-like protein binding	1/262	94/18352	0.742082	0.802413	0.650314	TNFAIP3	1
GO:0004674	protein serine/threonine kinase activity	5/262	435/18352	0.747366	0.806815	0.653881	RIPK2/IRAK2/NUAK2/ERN1/IKBKE	5
GO:0015294	solute:cation symporter activity	1/262	98/18352	0.756571	0.81543	0.660863	SLC12A2	1
GO:0016791	phosphatase activity	3/262	277/18352	0.759483	0.817243	0.662332	DUSP4/PTPRB/PLPP3	3
GO:0042626	ATPase-coupled transmembrane transporter activity	1/262	100/18352	0.763509	0.820248	0.664768	ABCA3	1
GO:0004497	monooxygenase activity	1/262	101/18352	0.766904	0.822567	0.666647	SQLE	1
GO:0042578	phosphoric ester hydrolase activity	4/262	369/18352	0.775522	0.830471	0.673053	DUSP4/PTPRB/PLPP3/CCL5	4
GO:0051087	chaperone binding	1/262	104/18352	0.7768	0.830501	0.673077	SLC12A2	1
GO:0016407	acetyltransferase activity	1/262	105/18352	0.780004	0.832589	0.674769	SAT1	1
GO:0005496	steroid binding	1/262	106/18352	0.783163	0.83393	0.675856	INSIG1	1
GO:0015399	primary active transmembrane transporter activity	1/262	107/18352	0.786277	0.83393	0.675856	ABCA3	1
GO:0016410	N-acyltransferase activity	1/262	107/18352	0.786277	0.83393	0.675856	SAT1	1
GO:0047485	protein N-terminus binding	1/262	107/18352	0.786277	0.83393	0.675856	ID1	1
GO:0016651	oxidoreductase activity, acting on NAD(P)H	1/262	109/18352	0.792371	0.839055	0.68001	GMPR	1
GO:0009055	electron transfer activity	1/262	111/18352	0.798292	0.843981	0.684002	C15orf48	1
GO:0140097	catalytic activity, acting on DNA	2/262	209/18352	0.802266	0.846836	0.686316	HMGA2/ISG20	2
GO:0004197	cysteine-type endopeptidase activity	1/262	114/18352	0.80686	0.850336	0.689152	CTSS	1
GO:0003730	mRNA 3'-UTR binding	1/262	117/18352	0.815065	0.854844	0.692806	ZC3H12A	1
GO:0015267	channel activity	5/262	479/18352	0.81738	0.854844	0.692806	P2RX7/KCNJ2/KCNK15/CACNA1A/KCNT2	5
GO:0005262	calcium channel activity	1/262	118/18352	0.817722	0.854844	0.692806	CACNA1A	1
GO:0051082	unfolded protein binding	1/262	118/18352	0.817722	0.854844	0.692806	ERN1	1
GO:0022803	passive transmembrane transporter activity	5/262	480/18352	0.818772	0.854844	0.692806	P2RX7/KCNJ2/KCNK15/CACNA1A/KCNT2	5
GO:0000287	magnesium ion binding	2/262	217/18352	0.818851	0.854844	0.692806	NUAK2/ERN1	2
GO:0099106	ion channel regulator activity	1/262	119/18352	0.820341	0.855058	0.692979	RRAD	1
GO:0140101	catalytic activity, acting on a tRNA	1/262	123/18352	0.830448	0.864238	0.700419	WARS1	1
GO:0015078	proton transmembrane transporter activity	1/262	127/18352	0.839989	0.871547	0.706343	C15orf48	1
GO:0016747	transferase activity, transferring acyl groups other than amino-acyl groups	2/262	229/18352	0.841403	0.871547	0.706343	PLA2G4C/SAT1	2
GO:0022853	active ion transmembrane transporter activity	2/262	229/18352	0.841403	0.871547	0.706343	SLC12A2/SLC26A2	2
GO:0003774	motor activity	1/262	132/18352	0.851165	0.880288	0.713427	MYO1B	1
GO:0016798	hydrolase activity, acting on glycosyl bonds	1/262	133/18352	0.853305	0.881131	0.71411	TLR2	1
GO:0015085	calcium ion transmembrane transporter activity	1/262	134/18352	0.855415	0.88194	0.714765	CACNA1A	1
GO:0020037	heme binding	1/262	138/18352	0.863555	0.888954	0.72045	STC2	1
GO:0008234	cysteine-type peptidase activity	1/262	139/18352	0.865518	0.889597	0.720972	CTSS	1
GO:0008528	G protein-coupled peptide receptor activity	1/262	148/18352	0.881964	0.902317	0.73128	NPR3	1
GO:0016247	channel regulator activity	1/262	148/18352	0.881964	0.902317	0.73128	RRAD	1
GO:0046906	tetrapyrrole binding	1/262	148/18352	0.881964	0.902317	0.73128	STC2	1
GO:0001653	peptide receptor activity	1/262	152/18352	0.888614	0.906332	0.734534	NPR3	1
GO:0015081	sodium ion transmembrane transporter activity	1/262	152/18352	0.888614	0.906332	0.734534	SLC12A2	1
GO:0003713	transcription coactivator activity	2/262	267/18352	0.897028	0.913512	0.740354	ID1/SOX17	2
GO:0016705	oxidoreductase activity, acting on paired donors, with incorporation or reduction of molecular oxygen	1/262	162/18352	0.903652	0.91605	0.74241	SQLE	1
GO:0017048	Rho GTPase binding	1/262	162/18352	0.903652	0.91605	0.74241	DOCK4	1
GO:0072509	divalent inorganic cation transmembrane transporter activity	1/262	162/18352	0.903652	0.91605	0.74241	CACNA1A	1
GO:0016874	ligase activity	1/262	165/18352	0.907756	0.91881	0.744647	WARS1	1
GO:0017016	Ras GTPase binding	3/262	415/18352	0.937961	0.94794	0.768255	RASGRF2/DOCK4/RAPGEF5	3
GO:0031267	small GTPase binding	3/262	428/18352	0.945953	0.954566	0.773625	RASGRF2/DOCK4/RAPGEF5	3
GO:0008168	methyltransferase activity	1/262	218/18352	0.957297	0.96455	0.781717	METTL7A	1
GO:0016741	transferase activity, transferring one-carbon groups	1/262	229/18352	0.963616	0.969447	0.785686	METTL7A	1
GO:0042393	histone binding	1/262	238/18352	0.968086	0.972473	0.788138	SAMD1	1
GO:0005096	GTPase activator activity	1/262	275/18352	0.981395	0.984356	0.797768	DOCK4	1
GO:0030695	GTPase regulator activity	1/262	307/18352	0.988344	0.989832	0.802207	DOCK4	1
GO:0060589	nucleoside-triphosphatase regulator activity	1/262	348/18352	0.993605	0.993605	0.805264	DOCK4	1

## Sheet: GO Cellular componenet
ID	Description	GeneRatio	BgRatio	pvalue	p.adjust	qvalue	geneID	Count
GO:0070820	tertiary granule	13/264	164/19559	3.67999e-07	0.000123648	0.000106913	CEACAM1/DSP/PLAU/TNFAIP6/CD93/PTPRB/ADAM8/CTSS/PTX3/CXCL1/LRG1/METTL7A/CD47	13
GO:0033256	I-kappaB/NF-kappaB complex	3/264	4/19559	9.62894e-06	0.00129816	0.00112247	NFKB2/NFKBIA/NFKB1	3
GO:0042581	specific granule	11/264	160/19559	1.15907e-05	0.00129816	0.00112247	PLAUR/CEACAM1/NFKB1/PLAU/CD93/PTPRB/ADAM8/PTX3/CXCL1/LRG1/CD47	11
GO:0030667	secretory granule membrane	14/264	306/19559	7.62478e-05	0.006394	0.00552865	PLAUR/CD44/LAMP3/CEACAM1/B4GALT1/DSP/PLAU/CD93/PTPRB/TLR2/PLA1A/ADAM8/ABCA3/CD47	14
GO:1904724	tertiary granule lumen	6/264	55/19559	9.51488e-05	0.006394	0.00552865	TNFAIP6/CTSS/PTX3/CXCL1/LRG1/METTL7A	6
GO:0071065	alpha9-beta1 integrin-vascular cell adhesion molecule-1 complex	2/264	2/19559	0.000181505	0.00762321	0.0065915	ADAM8/VCAM1	2
GO:0097232	lamellar body membrane	2/264	2/19559	0.000181505	0.00762321	0.0065915	LAMP3/ABCA3	2
GO:0097233	alveolar lamellar body membrane	2/264	2/19559	0.000181505	0.00762321	0.0065915	LAMP3/ABCA3	2
GO:0035579	specific granule membrane	7/264	91/19559	0.000232406	0.00867647	0.00750221	PLAUR/CEACAM1/PLAU/CD93/PTPRB/ADAM8/CD47	7
GO:0070821	tertiary granule membrane	6/264	73/19559	0.000456416	0.0149292	0.0129087	CEACAM1/PLAU/CD93/PTPRB/ADAM8/CD47	6
GO:0043256	laminin complex	3/264	12/19559	0.000488753	0.0149292	0.0129087	LAMC2/NTN4/LAMB3	3
GO:0034666	integrin alpha2-beta1 complex	2/264	3/19559	0.000539652	0.0151103	0.0130653	ITGA2/LYN	2
GO:0005902	microvillus	6/264	93/19559	0.00163405	0.0422338	0.0365179	CD44/CEACAM1/CA2/MYO1B/SLC26A2/VCAM1	6
GO:0016323	basolateral plasma membrane	10/264	246/19559	0.00194933	0.046784	0.0404524	CD44/SLC12A2/CEACAM1/B4GALT1/DSP/CA2/LDLR/SLC16A12/PLPP3/CLDN1	10
GO:0097443	sorting endosome	2/264	6/19559	0.00262676	0.0588395	0.0508762	KDR/LDLR	2
GO:0098858	actin-based cell projection	9/264	220/19559	0.00310266	0.0651558	0.0563377	CD44/KITLG/CEACAM1/B4GALT1/CA2/DOCK4/MYO1B/SLC26A2/VCAM1	9
GO:0097208	alveolar lamellar body	2/264	7/19559	0.00364477	0.0720377	0.0622883	LAMP3/ABCA3	2
GO:0098857	membrane microdomain	11/264	330/19559	0.00540649	0.0978394	0.084598	SELE/BIRC3/ICAM1/KDR/DYSF/TLR2/PLPP3/CAVIN2/IRS1/TNF/LYN	11
GO:0062023	collagen-containing extracellular matrix	13/264	427/19559	0.00553259	0.0978394	0.084598	LAMC2/NTN4/ICAM1/ANGPT2/GDF15/SERPINE2/ANGPTL2/THBS1/ABI3BP/CTSS/GREM1/LGALS9/LAMB3	13
GO:0071141	SMAD protein complex	2/264	9/19559	0.00613773	0.103114	0.0891586	SMAD6/HMGA2	2
GO:0098589	membrane region	11/264	343/19559	0.00715162	0.114426	0.0989396	SELE/BIRC3/ICAM1/KDR/DYSF/TLR2/PLPP3/CAVIN2/IRS1/TNF/LYN	11
GO:0035580	specific granule lumen	4/264	62/19559	0.00981054	0.149384	0.129167	NFKB1/PTX3/CXCL1/LRG1	4
GO:0009897	external side of plasma membrane	12/264	417/19559	0.0114709	0.149384	0.129167	B4GALT1/P2RX7/ICAM1/LDLR/SERPINE2/THBS1/VCAM1/ITGA2/IL7R/CXCL10/HLA-F/TNF	12
GO:0034358	plasma lipoprotein particle	3/264	36/19559	0.0125001	0.149384	0.129167	LDLR/SAA2/SAA1	3
GO:1990777	lipoprotein particle	3/264	36/19559	0.0125001	0.149384	0.129167	LDLR/SAA2/SAA1	3
GO:0043509	activin A complex	1/264	1/19559	0.0134976	0.149384	0.129167	INHBA	1
GO:0048180	activin complex	1/264	1/19559	0.0134976	0.149384	0.129167	INHBA	1
GO:0071133	alpha9-beta1 integrin-ADAM8 complex	1/264	1/19559	0.0134976	0.149384	0.129167	ADAM8	1
GO:1990332	Ire1 complex	1/264	1/19559	0.0134976	0.149384	0.129167	ERN1	1
GO:0005769	early endosome	11/264	377/19559	0.013818	0.149384	0.129167	LAMP3/LIPG/KDR/MYO1B/LDLR/DYSF/VCAM1/SAMD9L/DNER/HLA-F/NEURL1B	11
GO:0045178	basal part of cell	4/264	69/19559	0.0141356	0.149384	0.129167	SLC12A2/CEACAM1/PHLDB2/ITGA2	4
GO:0045121	membrane raft	10/264	329/19559	0.0142829	0.149384	0.129167	SELE/BIRC3/ICAM1/KDR/TLR2/PLPP3/CAVIN2/IRS1/TNF/LYN	10
GO:0045177	apical part of cell	12/264	433/19559	0.0150389	0.149384	0.129167	CD44/SLC12A2/CEACAM1/JAG1/CA2/PLAT/MYO1B/LDLR/CNKSR3/SLC26A2/VCAM1/CLDN1	12
GO:0032994	protein-lipid complex	3/264	39/19559	0.0155347	0.149384	0.129167	LDLR/SAA2/SAA1	3
GO:0005905	clathrin-coated pit	4/264	71/19559	0.0155608	0.149384	0.129167	SELE/SGIP1/LDLR/DAB2	4
GO:0042599	lamellar body	2/264	17/19559	0.0215991	0.176655	0.152747	LAMP3/ABCA3	2
GO:0005925	focal adhesion	11/264	415/19559	0.0259341	0.176655	0.152747	LAP3/RALA/PLAUR/CD44/LIMS2/ICAM1/PLAU/THSD1/PHLDB2/DAB2/ITGA2	11
GO:0030139	endocytic vesicle	9/264	313/19559	0.0268028	0.176655	0.152747	RALA/SGIP1/LDLR/DYSF/TLR2/ADAM8/CTSS/SAA1/HLA-F	9
GO:0005607	laminin-2 complex	1/264	2/19559	0.0268137	0.176655	0.152747	LAMC2	1
GO:0032398	MHC class Ib protein complex	1/264	2/19559	0.0268137	0.176655	0.152747	HLA-F	1
GO:0033257	Bcl3/NF-kappaB2 complex	1/264	2/19559	0.0268137	0.176655	0.152747	NFKB2	1
GO:0035354	Toll-like receptor 1-Toll-like receptor 2 protein complex	1/264	2/19559	0.0268137	0.176655	0.152747	TLR2	1
GO:0035692	macrophage migration inhibitory factor receptor complex	1/264	2/19559	0.0268137	0.176655	0.152747	CD44	1
GO:0043511	inhibin complex	1/264	2/19559	0.0268137	0.176655	0.152747	INHBA	1
GO:0043512	inhibin A complex	1/264	2/19559	0.0268137	0.176655	0.152747	INHBA	1
GO:0070743	interleukin-23 complex	1/264	2/19559	0.0268137	0.176655	0.152747	IL23A	1
GO:1902560	GMP reductase complex	1/264	2/19559	0.0268137	0.176655	0.152747	GMPR	1
GO:1990597	AIP1-IRE1 complex	1/264	2/19559	0.0268137	0.176655	0.152747	ERN1	1
GO:1990630	IRE1-RACK1-PP2A complex	1/264	2/19559	0.0268137	0.176655	0.152747	ERN1	1
GO:1990666	PCSK9-LDLR complex	1/264	2/19559	0.0268137	0.176655	0.152747	LDLR	1
GO:1990682	CSF1-CSF1R complex	1/264	2/19559	0.0268137	0.176655	0.152747	CSF1	1
GO:0030055	cell-substrate junction	11/264	423/19559	0.029245	0.186309	0.161094	LAP3/RALA/PLAUR/CD44/LIMS2/ICAM1/PLAU/THSD1/PHLDB2/DAB2/ITGA2	11
GO:0036019	endolysosome	2/264	20/19559	0.029388	0.186309	0.161094	LDLR/CTSS	2
GO:0005610	laminin-5 complex	1/264	3/19559	0.0399508	0.235499	0.203627	LAMB3	1
GO:0005896	interleukin-6 receptor complex	1/264	3/19559	0.0399508	0.235499	0.203627	IL6	1
GO:0030895	apolipoprotein B mRNA editing enzyme complex	1/264	3/19559	0.0399508	0.235499	0.203627	APOBEC3G	1
GO:0032937	SREBP-SCAP-Insig complex	1/264	3/19559	0.0399508	0.235499	0.203627	INSIG1	1
GO:0030057	desmosome	2/264	25/19559	0.044411	0.257277	0.222458	B4GALT1/DSP	2
GO:0031528	microvillus membrane	2/264	26/19559	0.0476932	0.271609	0.23485	CEACAM1/SLC26A2	2
GO:0101003	ficolin-1-rich granule membrane	3/264	61/19559	0.0493722	0.27351	0.236494	DSP/CD93/ADAM8	3
GO:0034364	high-density lipoprotein particle	2/264	27/19559	0.0510609	0.27351	0.236494	SAA2/SAA1	2
GO:0005899	insulin receptor complex	1/264	4/19559	0.0529112	0.27351	0.236494	IRS1	1
GO:0035976	transcription factor AP-1 complex	1/264	4/19559	0.0529112	0.27351	0.236494	JUNB	1
GO:0035985	senescence-associated heterochromatin focus	1/264	4/19559	0.0529112	0.27351	0.236494	HMGA2	1
GO:1990604	IRE1-TRAF2-ASK1 complex	1/264	4/19559	0.0529112	0.27351	0.236494	ERN1	1
GO:0030175	filopodium	4/264	106/19559	0.0555109	0.282601	0.244354	KITLG/B4GALT1/MYO1B/VCAM1	4
GO:0016328	lateral plasma membrane	3/264	65/19559	0.0576527	0.283783	0.245376	SLC12A2/CEACAM1/CLDN1	3
GO:0002102	podosome	2/264	29/19559	0.0580414	0.283783	0.245376	ADAM8/VCAM1	2
GO:0005788	endoplasmic reticulum lumen	8/264	308/19559	0.0582768	0.283783	0.245376	PLAUR/IL23A/STC2/C3/IL6/THBS1/PDGFC/CSF1	8
GO:0001725	stress fiber	3/264	68/19559	0.0642649	0.294324	0.25449	NEBL/ABLIM3/ROR1	3
GO:0097517	contractile actin filament bundle	3/264	68/19559	0.0642649	0.294324	0.25449	NEBL/ABLIM3/ROR1	3
GO:0008305	integrin complex	2/264	31/19559	0.06533	0.294324	0.25449	ITGA2/LYN	2
GO:0036021	endolysosome lumen	1/264	5/19559	0.0656972	0.294324	0.25449	CTSS	1
GO:0045180	basal cortex	1/264	5/19559	0.0656972	0.294324	0.25449	PHLDB2	1
GO:0098844	postsynaptic endocytic zone membrane	1/264	5/19559	0.0656972	0.294324	0.25449	MX2	1
GO:0005911	cell-cell junction	11/264	493/19559	0.0718672	0.317729	0.274728	LIMS2/CEACAM1/B4GALT1/P2RX7/DSP/JAG1/DDX58/KCNJ2/CLDN14/PLPP3/CLDN1	11
GO:0030665	clathrin-coated vesicle membrane	4/264	118/19559	0.0759147	0.324847	0.280883	SGIP1/LDLR/DAB2/IL7R	4
GO:0032010	phagolysosome	1/264	6/19559	0.0783113	0.324847	0.280883	ADAM8	1
GO:0032127	dense core granule membrane	1/264	6/19559	0.0783113	0.324847	0.280883	ADAM8	1
GO:0071438	invadopodium membrane	1/264	6/19559	0.0783113	0.324847	0.280883	PLAUR	1
GO:0097136	Bcl-2 family protein complex	1/264	6/19559	0.0783113	0.324847	0.280883	BCL2L11	1
GO:0032432	actin filament bundle	3/264	76/19559	0.0834945	0.342124	0.295821	NEBL/ABLIM3/ROR1	3
GO:0098636	protein complex involved in cell adhesion	2/264	36/19559	0.0847615	0.343131	0.296692	ITGA2/LYN	2
GO:0015030	Cajal body	3/264	78/19559	0.088646	0.354584	0.306595	TRIM22/ISG20/SCARNA22	3
GO:0042406	extrinsic component of endoplasmic reticulum membrane	1/264	7/19559	0.0907557	0.356593	0.308332	ZC3H12A	1
GO:0042641	actomyosin	3/264	79/19559	0.0912708	0.356593	0.308332	NEBL/ABLIM3/ROR1	3
GO:0031253	cell projection membrane	8/264	344/19559	0.0955588	0.360615	0.31181	PLAUR/CD44/SLC12A2/CEACAM1/B4GALT1/DDX58/SLC26A2/HHIP	8
GO:0005901	caveola	3/264	82/19559	0.0993361	0.360615	0.31181	SELE/CAVIN2/IRS1	3
GO:0030669	clathrin-coated endocytic vesicle membrane	2/264	40/19559	0.10139	0.360615	0.31181	SGIP1/LDLR	2
GO:0030662	coated vesicle membrane	5/264	183/19559	0.102541	0.360615	0.31181	SGIP1/LDLR/DAB2/IL7R/HLA-F	5
GO:0005577	fibrinogen complex	1/264	8/19559	0.103033	0.360615	0.31181	THBS1	1
GO:0030061	mitochondrial crista	1/264	8/19559	0.103033	0.360615	0.31181	LYN	1
GO:0031232	extrinsic component of external side of plasma membrane	1/264	8/19559	0.103033	0.360615	0.31181	SERPINE2	1
GO:0036396	RNA N6-methyladenosine methyltransferase complex	1/264	8/19559	0.103033	0.360615	0.31181	WTAP	1
GO:0045293	mRNA editing complex	1/264	8/19559	0.103033	0.360615	0.31181	WTAP	1
GO:0071144	heteromeric SMAD protein complex	1/264	8/19559	0.103033	0.360615	0.31181	SMAD6	1
GO:0005667	transcription regulator complex	9/264	413/19559	0.108346	0.3753	0.324508	E2F2/HDAC9/RELB/ZBTB16/ETS1/SMAD6/NR4A2/SOX17/JUNB	9
GO:0000138	Golgi trans cisterna	1/264	9/19559	0.115145	0.386886	0.334525	B4GALT1	1
GO:0032059	bleb	1/264	9/19559	0.115145	0.386886	0.334525	P2RX7	1
GO:0042612	MHC class I protein complex	1/264	9/19559	0.115145	0.386886	0.334525	HLA-F	1
GO:0045335	phagocytic vesicle	4/264	140/19559	0.121561	0.400647	0.346424	TLR2/ADAM8/CTSS/HLA-F	4
GO:0019898	extrinsic component of membrane	7/264	306/19559	0.121625	0.400647	0.346424	PLAUR/CYLD/PLEKHA4/SERPINE2/BCL2L11/ZC3H12A/LYN	7
GO:0098802	plasma membrane signaling receptor complex	7/264	307/19559	0.123123	0.401645	0.347287	TRAF1/CEACAM1/IL6/TLR2/ITGA2/IRS1/LYN	7
GO:0005916	fascia adherens	1/264	10/19559	0.127094	0.406699	0.351657	DSP	1
GO:0098843	postsynaptic endocytic zone	1/264	10/19559	0.127094	0.406699	0.351657	MX2	1
GO:0005811	lipid droplet	3/264	93/19559	0.131165	0.415767	0.359498	PLA2G4C/G0S2/METTL7A	3
GO:0030122	AP-2 adaptor complex	1/264	11/19559	0.138882	0.436115	0.377092	SGIP1	1
GO:0031234	extrinsic component of cytoplasmic side of plasma membrane	3/264	99/19559	0.149847	0.448651	0.387931	CYLD/PLEKHA4/LYN	3
GO:0005751	mitochondrial respiratory chain complex IV	1/264	12/19559	0.150511	0.448651	0.387931	C15orf48	1
GO:0030128	clathrin coat of endocytic vesicle	1/264	12/19559	0.150511	0.448651	0.387931	SGIP1	1
GO:0044327	dendritic spine head	1/264	12/19559	0.150511	0.448651	0.387931	MX2	1
GO:0009925	basal plasma membrane	2/264	51/19559	0.150885	0.448651	0.387931	SLC12A2/CEACAM1	2
GO:0014704	intercalated disc	2/264	51/19559	0.150885	0.448651	0.387931	DSP/KCNJ2	2
GO:0016605	PML body	3/264	102/19559	0.159492	0.467382	0.404127	ZBTB16/ISG20/IKBKE	3
GO:0005614	interstitial matrix	1/264	13/19559	0.161984	0.467382	0.404127	ABI3BP	1
GO:0034362	low-density lipoprotein particle	1/264	13/19559	0.161984	0.467382	0.404127	LDLR	1
GO:0005604	basement membrane	3/264	103/19559	0.162749	0.467382	0.404127	LAMC2/NTN4/LAMB3	3
GO:0030315	T-tubule	2/264	54/19559	0.165104	0.470126	0.4065	KCNJ2/DYSF	2
GO:0036020	endolysosome membrane	1/264	14/19559	0.173303	0.489327	0.423102	LDLR	1
GO:0016607	nuclear speck	8/264	401/19559	0.176533	0.494294	0.427397	NAMPT/ZBTB16/SDCBP2/TRIM22/NFKBIZ/WTAP/NR4A2/ATOH8	8
GO:0016459	myosin complex	2/264	57/19559	0.179545	0.495854	0.428746	BMF/MYO1B	2
GO:0009898	cytoplasmic side of plasma membrane	4/264	164/19559	0.181598	0.495854	0.428746	TRAF1/CYLD/PLEKHA4/LYN	4
GO:0030666	endocytic vesicle membrane	4/264	164/19559	0.181598	0.495854	0.428746	SGIP1/LDLR/TLR2/HLA-F	4
GO:0005639	integral component of nuclear inner membrane	1/264	15/19559	0.18447	0.495854	0.428746	P2RX7	1
GO:0031229	intrinsic component of nuclear inner membrane	1/264	15/19559	0.18447	0.495854	0.428746	P2RX7	1
GO:0045334	clathrin-coated endocytic vesicle	2/264	59/19559	0.189276	0.503559	0.435408	SGIP1/LDLR	2
GO:0005637	nuclear inner membrane	2/264	60/19559	0.194168	0.503559	0.435408	P2RX7/ERN1	2
GO:0005767	secondary lysosome	1/264	16/19559	0.195486	0.503559	0.435408	ADAM8	1
GO:0030132	clathrin coat of coated pit	1/264	16/19559	0.195486	0.503559	0.435408	SGIP1	1
GO:0071437	invadopodium	1/264	16/19559	0.195486	0.503559	0.435408	PLAUR	1
GO:0044853	plasma membrane raft	3/264	113/19559	0.196328	0.503559	0.435408	SELE/CAVIN2/IRS1	3
GO:0019897	extrinsic component of plasma membrane	4/264	172/19559	0.203476	0.51794	0.447843	CYLD/PLEKHA4/SERPINE2/LYN	4
GO:0005884	actin filament	3/264	118/19559	0.213709	0.539897	0.466828	MYO1B/PSTPIP2/ACTBL2	3
GO:0016324	apical plasma membrane	7/264	361/19559	0.216818	0.543663	0.470085	CD44/SLC12A2/CEACAM1/JAG1/CNKSR3/SLC26A2/CLDN1	7
GO:0031965	nuclear membrane	6/264	301/19559	0.22256	0.553926	0.478959	NAV3/SMOX/P2RX7/GCH1/WTAP/ERN1	6
GO:0000145	exocyst	1/264	19/19559	0.227653	0.554749	0.47967	TNFAIP2	1
GO:0089717	spanning component of membrane	1/264	19/19559	0.227653	0.554749	0.47967	SLC12A2	1
GO:0005923	bicellular tight junction	3/264	122/19559	0.227843	0.554749	0.47967	DDX58/CLDN14/CLDN1	3
GO:0005938	cell cortex	6/264	305/19559	0.231263	0.559025	0.483367	SELE/LAMC2/FRY/PLA2G4C/PHLDB2/TNFAIP2	6
GO:0101002	ficolin-1-rich granule	3/264	124/19559	0.234976	0.559423	0.483712	TNFAIP6/CTSS/LRG1	3
GO:1904813	ficolin-1-rich granule lumen	3/264	124/19559	0.234976	0.559423	0.483712	TNFAIP6/CTSS/LRG1	3
GO:0045277	respiratory chain complex IV	1/264	20/19559	0.238088	0.559423	0.483712	C15orf48	1
GO:0071682	endocytic vesicle lumen	1/264	20/19559	0.238088	0.559423	0.483712	SAA1	1
GO:0005765	lysosomal membrane	7/264	375/19559	0.24455	0.562174	0.486091	LAMP3/B4GALT1/LDLR/DRAM1/DAB2/SLC2A6/HLA-F	7
GO:0098852	lytic vacuole membrane	7/264	375/19559	0.24455	0.562174	0.486091	LAMP3/B4GALT1/LDLR/DRAM1/DAB2/SLC2A6/HLA-F	7
GO:0035267	NuA4 histone acetyltransferase complex	1/264	21/19559	0.248382	0.562174	0.486091	ACTBL2	1
GO:0043189	H4/H2A histone acetyltransferase complex	1/264	21/19559	0.248382	0.562174	0.486091	ACTBL2	1
GO:0099091	postsynaptic specialization, intracellular component	1/264	21/19559	0.248382	0.562174	0.486091	LYN	1
GO:0098562	cytoplasmic side of membrane	4/264	188/19559	0.249298	0.562174	0.486091	TRAF1/CYLD/PLEKHA4/LYN	4
GO:0070160	tight junction	3/264	129/19559	0.252973	0.566658	0.489968	DDX58/CLDN14/CLDN1	3
GO:0031258	lamellipodium membrane	1/264	22/19559	0.258538	0.571506	0.494159	CD44	1
GO:0042629	mast cell granule	1/264	22/19559	0.258538	0.571506	0.494159	LYN	1
GO:0044291	cell-cell contact zone	2/264	74/19559	0.263789	0.579302	0.5009	DSP/KCNJ2	2
GO:0030136	clathrin-coated vesicle	4/264	194/19559	0.267031	0.582614	0.503764	SGIP1/LDLR/DAB2/IL7R	4
GO:0034774	secretory granule lumen	6/264	322/19559	0.269362	0.583907	0.504882	NFKB1/C3/THBS1/PTX3/CXCL1/LRG1	6
GO:0017053	transcription repressor complex	2/264	76/19559	0.273806	0.58598	0.506674	RELB/ZBTB16	2
GO:0031594	neuromuscular junction	2/264	76/19559	0.273806	0.58598	0.506674	P2RX7/SERPINE2	2
GO:0060205	cytoplasmic vesicle lumen	6/264	326/19559	0.278551	0.589189	0.50945	NFKB1/C3/THBS1/PTX3/CXCL1/LRG1	6
GO:0030670	phagocytic vesicle membrane	2/264	77/19559	0.278813	0.589189	0.50945	TLR2/HLA-F	2
GO:0031983	vesicle lumen	6/264	328/19559	0.283174	0.590444	0.510535	NFKB1/C3/THBS1/PTX3/CXCL1/LRG1	6
GO:0005881	cytoplasmic microtubule	2/264	78/19559	0.283817	0.590444	0.510535	CYLD/SAA1	2
GO:0030027	lamellipodium	4/264	201/19559	0.287997	0.590444	0.510535	CD44/KITLG/DYSF/ABLIM3	4
GO:0030131	clathrin adaptor complex	1/264	25/19559	0.288193	0.590444	0.510535	SGIP1	1
GO:0042611	MHC protein complex	1/264	25/19559	0.288193	0.590444	0.510535	HLA-F	1
GO:0002080	acrosomal membrane	1/264	26/19559	0.297813	0.606456	0.524379	PLA1A	1
GO:0043296	apical junction complex	3/264	143/19559	0.30421	0.613686	0.530631	DDX58/CLDN14/CLDN1	3
GO:0001891	phagocytic cup	1/264	27/19559	0.307304	0.613686	0.530631	TNF	1
GO:0031045	dense core granule	1/264	27/19559	0.307304	0.613686	0.530631	ADAM8	1
GO:0005635	nuclear envelope	8/264	473/19559	0.308669	0.613686	0.530631	NAV3/SMOX/P2RX7/PLA2G4C/GCH1/WTAP/ERN1/MX2	8
GO:0005791	rough endoplasmic reticulum	2/264	84/19559	0.313749	0.619518	0.535673	KCNJ2/ZC3H12A	2
GO:0005640	nuclear outer membrane	1/264	28/19559	0.316666	0.619518	0.535673	NAV3	1
GO:0072562	blood microparticle	3/264	148/19559	0.322661	0.619518	0.535673	C3/C1R/C1S	3
GO:0030125	clathrin vesicle coat	1/264	29/19559	0.325903	0.619518	0.535673	SGIP1	1
GO:0030867	rough endoplasmic reticulum membrane	1/264	29/19559	0.325903	0.619518	0.535673	ZC3H12A	1
GO:0071556	integral component of lumenal side of endoplasmic reticulum membrane	1/264	29/19559	0.325903	0.619518	0.535673	HLA-F	1
GO:0098553	lumenal side of endoplasmic reticulum membrane	1/264	29/19559	0.325903	0.619518	0.535673	HLA-F	1
GO:0044306	neuron projection terminus	3/264	149/19559	0.326353	0.619518	0.535673	GCH1/ITGA2/ROR1	3
GO:0000932	P-body	2/264	88/19559	0.333557	0.629636	0.544423	ZC3H12A/APOBEC3G	2
GO:0031968	organelle outer membrane	4/264	218/19559	0.3397	0.634951	0.549017	NAV3/BMF/BCL2L11/MAOA	4
GO:0044298	cell body membrane	1/264	31/19559	0.344005	0.634951	0.549017	SLC12A2	1
GO:0090543	Flemming body	1/264	31/19559	0.344005	0.634951	0.549017	RALA	1
GO:1902555	endoribonuclease complex	1/264	31/19559	0.344005	0.634951	0.549017	ERN1	1
GO:0019867	outer membrane	4/264	220/19559	0.345821	0.634951	0.549017	NAV3/BMF/BCL2L11/MAOA	4
GO:0031091	platelet alpha granule	2/264	91/19559	0.348307	0.636038	0.549958	SERPINE2/THBS1	2
GO:0005774	vacuolar membrane	7/264	427/19559	0.355054	0.644855	0.557582	LAMP3/B4GALT1/LDLR/DRAM1/DAB2/SLC2A6/HLA-F	7
GO:0030176	integral component of endoplasmic reticulum membrane	3/264	158/19559	0.35954	0.64848	0.560716	ERN1/INSIG1/HLA-F	3
GO:0070971	endoplasmic reticulum exit site	1/264	33/19559	0.361622	0.64848	0.560716	PLPP3	1
GO:0098862	cluster of actin-based cell projections	3/264	159/19559	0.363217	0.64848	0.560716	B4GALT1/DOCK4/MYO1B	3
GO:0005790	smooth endoplasmic reticulum	1/264	34/19559	0.370253	0.64848	0.560716	KCNJ2	1
GO:0070069	cytochrome complex	1/264	34/19559	0.370253	0.64848	0.560716	C15orf48	1
GO:1990752	microtubule end	1/264	34/19559	0.370253	0.64848	0.560716	NAV3	1
GO:0090575	RNA polymerase II transcription regulator complex	3/264	161/19559	0.37056	0.64848	0.560716	E2F2/SMAD6/JUNB	3
GO:0030135	coated vesicle	5/264	298/19559	0.375554	0.653815	0.565329	SGIP1/LDLR/DAB2/IL7R/HLA-F	5
GO:0031904	endosome lumen	1/264	35/19559	0.378768	0.656011	0.567227	CTSS	1
GO:0036464	cytoplasmic ribonucleoprotein granule	4/264	233/19559	0.385598	0.656545	0.56769	NFKBIZ/ZC3H12C/ZC3H12A/APOBEC3G	4
GO:0031463	Cul3-RING ubiquitin ligase complex	1/264	36/19559	0.387168	0.656545	0.56769	KBTBD8	1
GO:0098576	lumenal side of membrane	1/264	36/19559	0.387168	0.656545	0.56769	HLA-F	1
GO:0005912	adherens junction	3/264	166/19559	0.388847	0.656545	0.56769	CEACAM1/JAG1/PLPP3	3
GO:0031227	intrinsic component of endoplasmic reticulum membrane	3/264	166/19559	0.388847	0.656545	0.56769	ERN1/INSIG1/HLA-F	3
GO:1905348	endonuclease complex	1/264	37/19559	0.395455	0.664365	0.574451	ERN1	1
GO:1902911	protein kinase complex	2/264	104/19559	0.410768	0.684801	0.592121	IRS1/ERN1	2
GO:0001772	immunological synapse	1/264	39/19559	0.411696	0.684801	0.592121	ICAM1	1
GO:0034708	methyltransferase complex	2/264	105/19559	0.415457	0.685195	0.592462	HDAC9/WTAP	2
GO:0035770	ribonucleoprotein granule	4/264	243/19559	0.416011	0.685195	0.592462	NFKBIZ/ZC3H12C/ZC3H12A/APOBEC3G	4
GO:0005903	brush border	2/264	106/19559	0.420126	0.688597	0.595404	B4GALT1/MYO1B	2
GO:0030119	AP-type membrane coat adaptor complex	1/264	41/19559	0.427502	0.697285	0.602915	SGIP1	1
GO:0099738	cell cortex region	1/264	42/19559	0.435245	0.706485	0.610871	PHLDB2	1
GO:0005891	voltage-gated calcium channel complex	1/264	43/19559	0.442885	0.715429	0.618604	CACNA1A	1
GO:0030496	midbody	3/264	182/19559	0.446339	0.71756	0.620446	LAP3/RALA/CYLD	3
GO:0001533	cornified envelope	1/264	45/19559	0.457856	0.730392	0.631542	DSP	1
GO:0001669	acrosomal vesicle	2/264	115/19559	0.461259	0.730392	0.631542	BMF/PLA1A	2
GO:0030118	clathrin coat	1/264	46/19559	0.46519	0.730392	0.631542	SGIP1	1
GO:0097542	ciliary tip	1/264	46/19559	0.46519	0.730392	0.631542	CYLD	1
GO:1902562	H4 histone acetyltransferase complex	1/264	46/19559	0.46519	0.730392	0.631542	ACTBL2	1
GO:0043209	myelin sheath	1/264	47/19559	0.472426	0.738303	0.638382	CA2	1
GO:0005741	mitochondrial outer membrane	3/264	192/19559	0.481179	0.7485	0.647199	BMF/BCL2L11/MAOA	3
GO:0031312	extrinsic component of organelle membrane	1/264	49/19559	0.486606	0.753454	0.651483	ZC3H12A	1
GO:0031252	cell leading edge	6/264	421/19559	0.504088	0.776943	0.671793	CD44/KITLG/DDX58/DYSF/PHLDB2/ABLIM3	6
GO:0005770	late endosome	4/264	278/19559	0.518873	0.789625	0.682758	LAMP3/LDLR/DYSF/CTSS	4
GO:0032154	cleavage furrow	1/264	54/19559	0.520417	0.789625	0.682758	RALA	1
GO:0032420	stereocilium	1/264	54/19559	0.520417	0.789625	0.682758	DOCK4	1
GO:0001650	fibrillar center	2/264	129/19559	0.521716	0.789625	0.682758	NFKBIE/DAB2	2
GO:0043679	axon terminus	2/264	130/19559	0.525859	0.792326	0.685094	ITGA2/ROR1	2
GO:0030120	vesicle coat	1/264	56/19559	0.533312	0.799968	0.691701	SGIP1	1
GO:0031526	brush border membrane	1/264	58/19559	0.545861	0.808482	0.699064	B4GALT1	1
GO:0035577	azurophil granule membrane	1/264	58/19559	0.545861	0.808482	0.699064	B4GALT1	1
GO:0042383	sarcolemma	2/264	135/19559	0.546207	0.808482	0.699064	KCNJ2/DYSF	2
GO:0032421	stereocilium bundle	1/264	59/19559	0.552009	0.813487	0.703391	DOCK4	1
GO:0012507	ER to Golgi transport vesicle membrane	1/264	62/19559	0.56996	0.836273	0.723094	HLA-F	1
GO:0019005	SCF ubiquitin ligase complex	1/264	63/19559	0.575783	0.841144	0.727305	SPSB1	1
GO:0031093	platelet alpha granule lumen	1/264	67/19559	0.5983	0.866503	0.749232	THBS1	1
GO:0034704	calcium channel complex	1/264	67/19559	0.5983	0.866503	0.749232	CACNA1A	1
GO:0099023	vesicle tethering complex	1/264	70/19559	0.614403	0.880956	0.761729	TNFAIP2	1
GO:0016529	sarcoplasmic reticulum	1/264	71/19559	0.619626	0.880956	0.761729	THBS1	1
GO:0005766	primary lysosome	2/264	155/19559	0.621389	0.880956	0.761729	B4GALT1/C3	2
GO:0036064	ciliary basal body	2/264	155/19559	0.621389	0.880956	0.761729	CYLD/RPGR	2
GO:0042582	azurophil granule	2/264	155/19559	0.621389	0.880956	0.761729	B4GALT1/C3	2
GO:0032153	cell division site	1/264	72/19559	0.624779	0.881853	0.762504	RALA	1
GO:0060170	ciliary membrane	1/264	74/19559	0.634877	0.881853	0.762504	HHIP	1
GO:0033116	endoplasmic reticulum-Golgi intermediate compartment membrane	1/264	75/19559	0.639824	0.881853	0.762504	PLPP3	1
GO:0031461	cullin-RING ubiquitin ligase complex	2/264	162/19559	0.645339	0.881853	0.762504	KBTBD8/SPSB1	2
GO:0005802	trans-Golgi network	3/264	245/19559	0.645382	0.881853	0.762504	LAP3/MYO1B/PLPP3	3
GO:0000118	histone deacetylase complex	1/264	77/19559	0.649518	0.881853	0.762504	HDAC9	1
GO:0035097	histone methyltransferase complex	1/264	77/19559	0.649518	0.881853	0.762504	HDAC9	1
GO:0000792	heterochromatin	1/264	78/19559	0.654268	0.881853	0.762504	HMGA2	1
GO:0005758	mitochondrial intermembrane space	1/264	80/19559	0.663575	0.881853	0.762504	LYN	1
GO:0016528	sarcoplasm	1/264	80/19559	0.663575	0.881853	0.762504	THBS1	1
GO:0090734	site of DNA damage	1/264	82/19559	0.672633	0.881853	0.762504	NKX3-1	1
GO:0000123	histone acetyltransferase complex	1/264	83/19559	0.67707	0.881853	0.762504	ACTBL2	1
GO:0005775	vacuolar lumen	2/264	173/19559	0.68054	0.881853	0.762504	C3/CTSS	2
GO:0098685	Schaffer collateral - CA1 synapse	1/264	84/19559	0.681447	0.881853	0.762504	PLAT	1
GO:0005643	nuclear pore	1/264	85/19559	0.685766	0.881853	0.762504	MX2	1
GO:0055038	recycling endosome membrane	1/264	85/19559	0.685766	0.881853	0.762504	HLA-F	1
GO:0098803	respiratory chain complex	1/264	85/19559	0.685766	0.881853	0.762504	C15orf48	1
GO:0031256	leading edge membrane	2/264	175/19559	0.686626	0.881853	0.762504	CD44/DDX58	2
GO:0043197	dendritic spine	2/264	175/19559	0.686626	0.881853	0.762504	KCNJ2/MX2	2
GO:0044309	neuron spine	2/264	177/19559	0.692617	0.881853	0.762504	KCNJ2/MX2	2
GO:0005581	collagen trimer	1/264	87/19559	0.694228	0.881853	0.762504	C1QTNF1	1
GO:0008076	voltage-gated potassium channel complex	1/264	88/19559	0.698373	0.881853	0.762504	KCNJ2	1
GO:0001750	photoreceptor outer segment	1/264	89/19559	0.702463	0.881853	0.762504	RPGR	1
GO:0005746	mitochondrial respirasome	1/264	89/19559	0.702463	0.881853	0.762504	C15orf48	1
GO:1902554	serine/threonine protein kinase complex	1/264	89/19559	0.702463	0.881853	0.762504	ERN1	1
GO:0031970	organelle envelope lumen	1/264	90/19559	0.706498	0.881853	0.762504	LYN	1
GO:0035578	azurophil granule lumen	1/264	91/19559	0.710477	0.881853	0.762504	C3	1
GO:0031248	protein acetyltransferase complex	1/264	93/19559	0.718277	0.881853	0.762504	ACTBL2	1
GO:0032580	Golgi cisterna membrane	1/264	93/19559	0.718277	0.881853	0.762504	B4GALT1	1
GO:1902493	acetyltransferase complex	1/264	93/19559	0.718277	0.881853	0.762504	ACTBL2	1
GO:0098978	glutamatergic synapse	4/264	361/19559	0.721083	0.881853	0.762504	PLAT/ACTBL2/ABLIM3/LYN	4
GO:0030117	membrane coat	1/264	94/19559	0.722097	0.881853	0.762504	SGIP1	1
GO:0032588	trans-Golgi network membrane	1/264	94/19559	0.722097	0.881853	0.762504	MYO1B	1
GO:0048475	coated membrane	1/264	94/19559	0.722097	0.881853	0.762504	SGIP1	1
GO:0030134	COPII-coated ER to Golgi transport vesicle	1/264	95/19559	0.725867	0.881853	0.762504	HLA-F	1
GO:0032587	ruffle membrane	1/264	95/19559	0.725867	0.881853	0.762504	DDX58	1
GO:0034451	centriolar satellite	1/264	95/19559	0.725867	0.881853	0.762504	DYSF	1
GO:0055037	recycling endosome	2/264	190/19559	0.729289	0.881853	0.762504	HLA-F/TNF	2
GO:0034705	potassium channel complex	1/264	96/19559	0.729585	0.881853	0.762504	KCNJ2	1
GO:0043202	lysosomal lumen	1/264	96/19559	0.729585	0.881853	0.762504	CTSS	1
GO:0005819	spindle	4/264	367/19559	0.732939	0.881853	0.762504	FRY/CYLD/HECW2/KBTBD8	4
GO:0031301	integral component of organelle membrane	4/264	367/19559	0.732939	0.881853	0.762504	P2RX7/ERN1/INSIG1/HLA-F	4
GO:0098791	Golgi apparatus subcompartment	4/264	368/19559	0.734877	0.881853	0.762504	LAP3/B4GALT1/MYO1B/PLPP3	4
GO:0070469	respirasome	1/264	101/19559	0.747436	0.893731	0.772775	C15orf48	1
GO:0030863	cortical cytoskeleton	1/264	106/19559	0.764112	0.910431	0.787215	SELE	1
GO:0030017	sarcomere	2/264	207/19559	0.771602	0.91435	0.790604	NEBL/TIMP4	2
GO:0030658	transport vesicle membrane	2/264	209/19559	0.776182	0.91435	0.790604	CEACAM1/HLA-F	2
GO:1990204	oxidoreductase complex	1/264	110/19559	0.77666	0.91435	0.790604	GMPR	1
GO:0031984	organelle subcompartment	4/264	392/19559	0.778286	0.91435	0.790604	LAP3/B4GALT1/MYO1B/PLPP3	4
GO:0030660	Golgi-associated vesicle membrane	1/264	112/19559	0.782682	0.916311	0.792299	HLA-F	1
GO:0031300	intrinsic component of organelle membrane	4/264	398/19559	0.78822	0.91959	0.795134	P2RX7/ERN1/INSIG1/HLA-F	4
GO:0036126	sperm flagellum	1/264	115/19559	0.791413	0.920121	0.795593	RPGR	1
GO:0031985	Golgi cisterna	1/264	117/19559	0.797039	0.920293	0.795742	B4GALT1	1
GO:0097733	photoreceptor cell cilium	1/264	117/19559	0.797039	0.920293	0.795742	RPGR	1
GO:0034703	cation channel complex	2/264	221/19559	0.802016	0.922868	0.797969	KCNJ2/CACNA1A	2
GO:0097729	9+2 motile cilium	1/264	120/19559	0.805196	0.923365	0.798398	RPGR	1
GO:0030016	myofibril	2/264	227/19559	0.813917	0.930191	0.804301	NEBL/TIMP4	2
GO:0030018	Z disc	1/264	128/19559	0.825385	0.93534	0.808752	NEBL	1
GO:0005793	endoplasmic reticulum-Golgi intermediate compartment	1/264	130/19559	0.830098	0.93534	0.808752	PLPP3	1
GO:0043292	contractile fiber	2/264	238/19559	0.834091	0.93534	0.808752	NEBL/TIMP4	2
GO:0005874	microtubule	4/264	431/19559	0.836656	0.93534	0.808752	NAV3/CYLD/DYSF/SAA1	4
GO:0072686	mitotic spindle	1/264	133/19559	0.83693	0.93534	0.808752	HECW2	1
GO:0005777	peroxisome	1/264	137/19559	0.845616	0.93534	0.808752	LACC1	1
GO:0042579	microbody	1/264	137/19559	0.845616	0.93534	0.808752	LACC1	1
GO:0098800	inner mitochondrial membrane protein complex	1/264	138/19559	0.847715	0.93534	0.808752	C15orf48	1
GO:0097731	9+0 non-motile cilium	1/264	139/19559	0.849785	0.93534	0.808752	RPGR	1
GO:0031674	I band	1/264	140/19559	0.851827	0.93534	0.808752	NEBL	1
GO:0031902	late endosome membrane	1/264	140/19559	0.851827	0.93534	0.808752	LAMP3	1
GO:0042101	T cell receptor complex	1/264	140/19559	0.851827	0.93534	0.808752	CEACAM1	1
GO:0045111	intermediate filament cytoskeleton	2/264	251/19559	0.855379	0.93618	0.809479	DSP/PHLDB2	2
GO:0061695	transferase complex, transferring phosphorus-containing groups	2/264	253/19559	0.858425	0.936463	0.809724	IRS1/ERN1	2
GO:0005795	Golgi stack	1/264	151/19559	0.872544	0.948786	0.820379	B4GALT1	1
GO:0042734	presynaptic membrane	1/264	156/19559	0.880981	0.95487	0.825639	FOSL1	1
GO:0031901	early endosome membrane	1/264	161/19559	0.888861	0.960313	0.830346	HLA-F	1
GO:0000922	spindle pole	1/264	165/19559	0.89479	0.963303	0.832931	FRY	1
GO:0097730	non-motile cilium	1/264	167/19559	0.897635	0.963303	0.832931	RPGR	1
GO:0000151	ubiquitin ligase complex	2/264	287/19559	0.90198	0.963303	0.832931	KBTBD8/SPSB1	2
GO:0031225	anchored component of membrane	1/264	171/19559	0.903097	0.963303	0.832931	PLAUR	1
GO:0001726	ruffle	1/264	179/19559	0.913165	0.966265	0.835492	DDX58	1
GO:0034702	ion channel complex	2/264	299/19559	0.914116	0.966265	0.835492	KCNJ2/CACNA1A	2
GO:0005798	Golgi-associated vesicle	1/264	181/19559	0.915514	0.966265	0.835492	HLA-F	1
GO:0030133	transport vesicle	3/264	410/19559	0.917377	0.966265	0.835492	CEACAM1/GALNT15/HLA-F	3
GO:0150034	distal axon	2/264	309/19559	0.923141	0.969298	0.838115	ITGA2/ROR1	2
GO:0030427	site of polarized growth	1/264	191/19559	0.926346	0.969633	0.838405	FRY	1
GO:1902495	transmembrane transporter complex	2/264	322/19559	0.933546	0.970706	0.839332	KCNJ2/CACNA1A	2
GO:0031514	motile cilium	1/264	199/19559	0.934006	0.970706	0.839332	RPGR	1
GO:0032993	protein-DNA complex	1/264	205/19559	0.939226	0.970706	0.839332	HMGA2	1
GO:1990351	transporter complex	2/264	330/19559	0.939272	0.970706	0.839332	KCNJ2/CACNA1A	2
GO:0014069	postsynaptic density	2/264	337/19559	0.943897	0.970706	0.839332	MX2/LYN	2
GO:0005882	intermediate filament	1/264	215/19559	0.947027	0.970706	0.839332	DSP	1
GO:0032279	asymmetric synapse	2/264	343/19559	0.947593	0.970706	0.839332	MX2/LYN	2
GO:0099572	postsynaptic specialization	2/264	361/19559	0.957343	0.977712	0.84539	MX2/LYN	2
GO:0098984	neuron to neuron synapse	2/264	368/19559	0.960646	0.978112	0.845736	MX2/LYN	2
GO:0097060	synaptic membrane	2/264	387/19559	0.968423	0.980695	0.847969	FOSL1/MX2	2
GO:0099568	cytoplasmic region	1/264	254/19559	0.96902	0.980695	0.847969	PHLDB2	1
GO:0098798	mitochondrial protein complex	1/264	265/19559	0.973375	0.982145	0.849223	C15orf48	1
GO:0045211	postsynaptic membrane	1/264	280/19559	0.978348	0.984206	0.851006	MX2	1
GO:0005743	mitochondrial inner membrane	2/264	489/19559	0.990608	0.993565	0.859097	C15orf48/LYN	2
GO:0005759	mitochondrial matrix	1/264	473/19559	0.998507	0.998507	0.863371	SOD2	1
