# Supplementary material for: Development of a bioinformatics platform for analysis of quantitative transcriptomics and proteomics data: the OMnalysis
Source: PeerJ. 2021 Nov 9;9:e12415. doi: 10.7717/peerj.12415 (PMC8588854; doi:10.7717/peerj.12415)
Supplement: Supplemental Information 10 [file peerj-09-12415-s010.xlsx]

## Sheet: GO Biological process
ID	Description	setSize	enrichmentScore	NES	pvalue	p.adjust	qvalues	rank	leading_edge	core_enrichment
GO:0009617	response to bacterium	49	0.656379	2.63157	1.96133e-10	4.15311e-07	3.76888e-07	68	tags=63%, list=24%, signal=58%	ENSG00000007908/ENSG00000169429/ENSG00000232810/ENSG00000006210/ENSG00000124875/ENSG00000108691/ENSG00000115009/ENSG00000163739/ENSG00000108342/ENSG00000169245/ENSG00000163735/ENSG00000125538/ENSG00000162892/ENSG00000166920/ENSG00000169248/ENSG00000115008/ENSG00000136244/ENSG00000137462/ENSG00000163734/ENSG00000154451/ENSG00000081041/ENSG00000166523/ENSG00000118503/ENSG00000226979/ENSG00000134070…
GO:0071219	cellular response to molecule of bacterial origin	27	0.746545	2.65592	2.37955e-10	4.15311e-07	3.76888e-07	67	tags=81%, list=24%, signal=68%	ENSG00000169429/ENSG00000232810/ENSG00000006210/ENSG00000124875/ENSG00000108691/ENSG00000163739/ENSG00000108342/ENSG00000169245/ENSG00000163735/ENSG00000125538/ENSG00000162892/ENSG00000169248/ENSG00000115008/ENSG00000136244/ENSG00000137462/ENSG00000163734/ENSG00000081041/ENSG00000118503/ENSG00000134070/ENSG00000090339/ENSG00000163874/ENSG00000173334
GO:0071222	cellular response to lipopolysaccharide	27	0.746545	2.65592	2.37955e-10	4.15311e-07	3.76888e-07	67	tags=81%, list=24%, signal=68%	ENSG00000169429/ENSG00000232810/ENSG00000006210/ENSG00000124875/ENSG00000108691/ENSG00000163739/ENSG00000108342/ENSG00000169245/ENSG00000163735/ENSG00000125538/ENSG00000162892/ENSG00000169248/ENSG00000115008/ENSG00000136244/ENSG00000137462/ENSG00000163734/ENSG00000081041/ENSG00000118503/ENSG00000134070/ENSG00000090339/ENSG00000163874/ENSG00000173334
GO:0071216	cellular response to biotic stimulus	28	0.733926	2.62855	1.19052e-09	1.55655e-06	1.41254e-06	67	tags=79%, list=24%, signal=66%	ENSG00000169429/ENSG00000232810/ENSG00000006210/ENSG00000124875/ENSG00000108691/ENSG00000163739/ENSG00000108342/ENSG00000169245/ENSG00000163735/ENSG00000125538/ENSG00000162892/ENSG00000169248/ENSG00000115008/ENSG00000136244/ENSG00000137462/ENSG00000163734/ENSG00000081041/ENSG00000118503/ENSG00000134070/ENSG00000090339/ENSG00000163874/ENSG00000173334
GO:0002237	response to molecule of bacterial origin	36	0.681034	2.57386	1.78367e-09	1.55655e-06	1.41254e-06	67	tags=69%, list=24%, signal=61%	ENSG00000007908/ENSG00000169429/ENSG00000232810/ENSG00000006210/ENSG00000124875/ENSG00000108691/ENSG00000163739/ENSG00000108342/ENSG00000169245/ENSG00000163735/ENSG00000125538/ENSG00000162892/ENSG00000169248/ENSG00000115008/ENSG00000136244/ENSG00000137462/ENSG00000163734/ENSG00000081041/ENSG00000118503/ENSG00000226979/ENSG00000134070/ENSG00000168961/ENSG00000090339/ENSG00000163874/ENSG00000173334
GO:0032496	response to lipopolysaccharide	36	0.681034	2.57386	1.78367e-09	1.55655e-06	1.41254e-06	67	tags=69%, list=24%, signal=61%	ENSG00000007908/ENSG00000169429/ENSG00000232810/ENSG00000006210/ENSG00000124875/ENSG00000108691/ENSG00000163739/ENSG00000108342/ENSG00000169245/ENSG00000163735/ENSG00000125538/ENSG00000162892/ENSG00000169248/ENSG00000115008/ENSG00000136244/ENSG00000137462/ENSG00000163734/ENSG00000081041/ENSG00000118503/ENSG00000226979/ENSG00000134070/ENSG00000168961/ENSG00000090339/ENSG00000163874/ENSG00000173334
GO:0070098	chemokine-mediated signaling pathway	12	0.854818	2.52584	9.72746e-09	7.27614e-06	6.60297e-06	42	tags=92%, list=15%, signal=81%	ENSG00000169429/ENSG00000006210/ENSG00000124875/ENSG00000108691/ENSG00000115009/ENSG00000163739/ENSG00000169245/ENSG00000163735/ENSG00000169248/ENSG00000163734/ENSG00000081041
GO:0006954	inflammatory response	61	0.580581	2.37918	1.90493e-08	1.24677e-05	1.13143e-05	65	tags=52%, list=23%, signal=51%	ENSG00000007908/ENSG00000123610/ENSG00000169429/ENSG00000232810/ENSG00000006210/ENSG00000124875/ENSG00000108691/ENSG00000115009/ENSG00000136689/ENSG00000163739/ENSG00000169245/ENSG00000163735/ENSG00000125538/ENSG00000169248/ENSG00000115008/ENSG00000136244/ENSG00000137462/ENSG00000163734/ENSG00000134339/ENSG00000154451/ENSG00000081041/ENSG00000151651/ENSG00000118503/ENSG00000226979/ENSG00000134070…
GO:1990266	neutrophil migration	17	0.77433	2.52911	3.03992e-08	1.76856e-05	1.60493e-05	43	tags=76%, list=15%, signal=69%	ENSG00000169429/ENSG00000006210/ENSG00000124875/ENSG00000108691/ENSG00000115009/ENSG00000163739/ENSG00000169245/ENSG00000163735/ENSG00000125538/ENSG00000169248/ENSG00000163734/ENSG00000081041/ENSG00000151651
GO:0019221	cytokine-mediated signaling pathway	59	0.568722	2.32544	6.2155e-08	3.25444e-05	2.95334e-05	61	tags=49%, list=22%, signal=49%	ENSG00000227507/ENSG00000169429/ENSG00000232810/ENSG00000006210/ENSG00000124875/ENSG00000162692/ENSG00000108691/ENSG00000115009/ENSG00000136689/ENSG00000163739/ENSG00000108342/ENSG00000169245/ENSG00000163735/ENSG00000125538/ENSG00000162892/ENSG00000169248/ENSG00000115008/ENSG00000136244/ENSG00000163734/ENSG00000056558/ENSG00000081041/ENSG00000102524/ENSG00000118503/ENSG00000168685/ENSG00000112096…
GO:0006959	humoral immune response	18	0.758261	2.52096	1.00383e-07	4.77824e-05	4.33617e-05	58	tags=83%, list=21%, signal=71%	ENSG00000169429/ENSG00000232810/ENSG00000124875/ENSG00000108691/ENSG00000163739/ENSG00000169245/ENSG00000163735/ENSG00000125538/ENSG00000169248/ENSG00000136244/ENSG00000028277/ENSG00000163734/ENSG00000081041/ENSG00000226979/ENSG00000125730
GO:0030593	neutrophil chemotaxis	16	0.768999	2.48627	1.61658e-07	7.05369e-05	6.4011e-05	42	tags=75%, list=15%, signal=68%	ENSG00000169429/ENSG00000006210/ENSG00000124875/ENSG00000108691/ENSG00000115009/ENSG00000163739/ENSG00000169245/ENSG00000163735/ENSG00000125538/ENSG00000169248/ENSG00000163734/ENSG00000081041
GO:0097530	granulocyte migration	19	0.726512	2.44205	5.15271e-07	0.000207535	0.000188335	43	tags=68%, list=15%, signal=62%	ENSG00000169429/ENSG00000006210/ENSG00000124875/ENSG00000108691/ENSG00000115009/ENSG00000163739/ENSG00000169245/ENSG00000163735/ENSG00000125538/ENSG00000169248/ENSG00000163734/ENSG00000081041/ENSG00000151651
GO:0097529	myeloid leukocyte migration	23	0.689477	2.40513	6.36237e-07	0.000232424	0.000210921	43	tags=61%, list=15%, signal=56%	ENSG00000169429/ENSG00000006210/ENSG00000124875/ENSG00000108691/ENSG00000115009/ENSG00000163739/ENSG00000169245/ENSG00000163735/ENSG00000125538/ENSG00000169248/ENSG00000136244/ENSG00000163734/ENSG00000081041/ENSG00000151651
GO:1990868	response to chemokine	14	0.773634	2.4115	7.10235e-07	0.000232424	0.000210921	42	tags=79%, list=15%, signal=70%	ENSG00000169429/ENSG00000006210/ENSG00000124875/ENSG00000108691/ENSG00000115009/ENSG00000163739/ENSG00000169245/ENSG00000163735/ENSG00000169248/ENSG00000163734/ENSG00000081041
GO:1990869	cellular response to chemokine	14	0.773634	2.4115	7.10235e-07	0.000232424	0.000210921	42	tags=79%, list=15%, signal=70%	ENSG00000169429/ENSG00000006210/ENSG00000124875/ENSG00000108691/ENSG00000115009/ENSG00000163739/ENSG00000169245/ENSG00000163735/ENSG00000169248/ENSG00000163734/ENSG00000081041
GO:0071621	granulocyte chemotaxis	18	0.719199	2.39109	1.2824e-06	0.000394978	0.000358436	42	tags=67%, list=15%, signal=61%	ENSG00000169429/ENSG00000006210/ENSG00000124875/ENSG00000108691/ENSG00000115009/ENSG00000163739/ENSG00000169245/ENSG00000163735/ENSG00000125538/ENSG00000169248/ENSG00000163734/ENSG00000081041
GO:0071345	cellular response to cytokine stimulus	73	0.519692	2.18005	1.55803e-06	0.00041936	0.000380562	61	tags=44%, list=22%, signal=46%	ENSG00000227507/ENSG00000169429/ENSG00000232810/ENSG00000006210/ENSG00000124875/ENSG00000162692/ENSG00000108691/ENSG00000115009/ENSG00000136689/ENSG00000163739/ENSG00000108342/ENSG00000169245/ENSG00000163735/ENSG00000125538/ENSG00000162892/ENSG00000169248/ENSG00000115008/ENSG00000136244/ENSG00000137462/ENSG00000163734/ENSG00000056558/ENSG00000154451/ENSG00000081041/ENSG00000102524/ENSG00000118503…
GO:0019730	antimicrobial humoral response	8	0.874074	2.32654	1.6525e-06	0.00041936	0.000380562	42	tags=100%, list=15%, signal=87%	ENSG00000169429/ENSG00000124875/ENSG00000163739/ENSG00000169245/ENSG00000163735/ENSG00000169248/ENSG00000163734/ENSG00000081041
GO:0061844	antimicrobial humoral immune response mediated by antimicrobial peptide	8	0.874074	2.32654	1.6525e-06	0.00041936	0.000380562	42	tags=100%, list=15%, signal=87%	ENSG00000169429/ENSG00000124875/ENSG00000163739/ENSG00000169245/ENSG00000163735/ENSG00000169248/ENSG00000163734/ENSG00000081041
GO:0016477	cell migration	71	0.523749	2.19261	1.68192e-06	0.00041936	0.000380562	70	tags=48%, list=25%, signal=48%	ENSG00000007908/ENSG00000123610/ENSG00000169429/ENSG00000232810/ENSG00000006210/ENSG00000124875/ENSG00000162692/ENSG00000108691/ENSG00000115009/ENSG00000163739/ENSG00000169245/ENSG00000163735/ENSG00000125538/ENSG00000162892/ENSG00000135919/ENSG00000169248/ENSG00000136244/ENSG00000153993/ENSG00000058085/ENSG00000163734/ENSG00000081041/ENSG00000151651/ENSG00000196878/ENSG00000118503/ENSG00000112096…
GO:0071396	cellular response to lipid	39	0.589506	2.27123	1.7644e-06	0.000419927	0.000381076	72	tags=59%, list=26%, signal=51%	ENSG00000169429/ENSG00000232810/ENSG00000006210/ENSG00000124875/ENSG00000108691/ENSG00000163739/ENSG00000108342/ENSG00000169245/ENSG00000163735/ENSG00000125538/ENSG00000162892/ENSG00000169248/ENSG00000115008/ENSG00000136244/ENSG00000137462/ENSG00000163734/ENSG00000081041/ENSG00000118503/ENSG00000134070/ENSG00000090339/ENSG00000163874/ENSG00000173334/ENSG00000122641
GO:0050900	leukocyte migration	35	0.610052	2.29293	2.683e-06	0.000576716	0.000523359	61	tags=57%, list=22%, signal=51%	ENSG00000007908/ENSG00000169429/ENSG00000232810/ENSG00000006210/ENSG00000124875/ENSG00000162692/ENSG00000108691/ENSG00000115009/ENSG00000163739/ENSG00000169245/ENSG00000163735/ENSG00000125538/ENSG00000169248/ENSG00000136244/ENSG00000163734/ENSG00000081041/ENSG00000151651/ENSG00000168961/ENSG00000090339/ENSG00000173432
GO:0048870	cell motility	72	0.51745	2.16732	2.75361e-06	0.000576716	0.000523359	70	tags=47%, list=25%, signal=48%	ENSG00000007908/ENSG00000123610/ENSG00000169429/ENSG00000232810/ENSG00000006210/ENSG00000124875/ENSG00000162692/ENSG00000108691/ENSG00000115009/ENSG00000163739/ENSG00000169245/ENSG00000163735/ENSG00000125538/ENSG00000162892/ENSG00000135919/ENSG00000169248/ENSG00000136244/ENSG00000153993/ENSG00000058085/ENSG00000163734/ENSG00000081041/ENSG00000151651/ENSG00000196878/ENSG00000118503/ENSG00000112096…
GO:0051674	localization of cell	72	0.51745	2.16732	2.75361e-06	0.000576716	0.000523359	70	tags=47%, list=25%, signal=48%	ENSG00000007908/ENSG00000123610/ENSG00000169429/ENSG00000232810/ENSG00000006210/ENSG00000124875/ENSG00000162692/ENSG00000108691/ENSG00000115009/ENSG00000163739/ENSG00000169245/ENSG00000163735/ENSG00000125538/ENSG00000162892/ENSG00000135919/ENSG00000169248/ENSG00000136244/ENSG00000153993/ENSG00000058085/ENSG00000163734/ENSG00000081041/ENSG00000151651/ENSG00000196878/ENSG00000118503/ENSG00000112096…
GO:0030595	leukocyte chemotaxis	24	0.654423	2.29437	4.19945e-06	0.000845704	0.000767462	43	tags=58%, list=15%, signal=54%	ENSG00000169429/ENSG00000006210/ENSG00000124875/ENSG00000108691/ENSG00000115009/ENSG00000163739/ENSG00000169245/ENSG00000163735/ENSG00000125538/ENSG00000169248/ENSG00000136244/ENSG00000163734/ENSG00000081041/ENSG00000151651
GO:0006928	movement of cell or subcellular component	77	0.501773	2.10836	4.98251e-06	0.000942861	0.00085563	70	tags=45%, list=25%, signal=47%	ENSG00000007908/ENSG00000123610/ENSG00000169429/ENSG00000232810/ENSG00000006210/ENSG00000124875/ENSG00000162692/ENSG00000108691/ENSG00000115009/ENSG00000163739/ENSG00000169245/ENSG00000163735/ENSG00000125538/ENSG00000162892/ENSG00000135919/ENSG00000169248/ENSG00000136244/ENSG00000153993/ENSG00000058085/ENSG00000163734/ENSG00000081041/ENSG00000151651/ENSG00000196878/ENSG00000118503/ENSG00000112096…
GO:0034097	response to cytokine	83	0.49414	2.08202	5.04204e-06	0.000942861	0.00085563	61	tags=41%, list=22%, signal=46%	ENSG00000007908/ENSG00000227507/ENSG00000169429/ENSG00000232810/ENSG00000006210/ENSG00000124875/ENSG00000162692/ENSG00000108691/ENSG00000115009/ENSG00000136689/ENSG00000163739/ENSG00000108342/ENSG00000169245/ENSG00000163735/ENSG00000125538/ENSG00000162892/ENSG00000169248/ENSG00000115008/ENSG00000136244/ENSG00000137462/ENSG00000163734/ENSG00000056558/ENSG00000154451/ENSG00000081041/ENSG00000102524…
GO:0060326	cell chemotaxis	26	0.630103	2.23251	6.6308e-06	0.0011972	0.00108644	43	tags=54%, list=15%, signal=50%	ENSG00000169429/ENSG00000006210/ENSG00000124875/ENSG00000108691/ENSG00000115009/ENSG00000163739/ENSG00000169245/ENSG00000163735/ENSG00000125538/ENSG00000169248/ENSG00000136244/ENSG00000163734/ENSG00000081041/ENSG00000151651
GO:0019932	second-messenger-mediated signaling	11	0.793155	2.29659	7.47065e-06	0.00130388	0.00118325	26	tags=64%, list=9%, signal=60%	ENSG00000007908/ENSG00000169429/ENSG00000232810/ENSG00000162692/ENSG00000115009/ENSG00000169245/ENSG00000169248
GO:0019722	calcium-mediated signaling	8	0.843797	2.24595	1.27153e-05	0.00214765	0.00194895	13	tags=62%, list=5%, signal=61%	ENSG00000007908/ENSG00000169429/ENSG00000232810/ENSG00000162692/ENSG00000115009
GO:0001775	cell activation	66	0.503871	2.08502	1.43024e-05	0.00234022	0.00212371	74	tags=50%, list=27%, signal=48%	ENSG00000123610/ENSG00000169429/ENSG00000232810/ENSG00000006210/ENSG00000124875/ENSG00000162692/ENSG00000108691/ENSG00000204482/ENSG00000163739/ENSG00000169245/ENSG00000125538/ENSG00000135919/ENSG00000115008/ENSG00000136244/ENSG00000137462/ENSG00000028277/ENSG00000163131/ENSG00000151651/ENSG00000102524/ENSG00000166523/ENSG00000118503/ENSG00000168685/ENSG00000163661/ENSG00000168961/ENSG00000125730…
GO:0040011	locomotion	77	0.488989	2.05464	1.53419e-05	0.00243425	0.00220904	70	tags=44%, list=25%, signal=46%	ENSG00000007908/ENSG00000123610/ENSG00000169429/ENSG00000232810/ENSG00000006210/ENSG00000124875/ENSG00000162692/ENSG00000108691/ENSG00000115009/ENSG00000163739/ENSG00000169245/ENSG00000163735/ENSG00000125538/ENSG00000162892/ENSG00000135919/ENSG00000169248/ENSG00000136244/ENSG00000153993/ENSG00000058085/ENSG00000163734/ENSG00000081041/ENSG00000151651/ENSG00000196878/ENSG00000118503/ENSG00000112096…
GO:0006955	immune response	101	0.455403	1.94958	1.69796e-05	0.00261486	0.00237294	68	tags=40%, list=24%, signal=47%	ENSG00000227507/ENSG00000123610/ENSG00000169429/ENSG00000232810/ENSG00000006210/ENSG00000124875/ENSG00000162692/ENSG00000108691/ENSG00000204482/ENSG00000115009/ENSG00000136689/ENSG00000163739/ENSG00000108342/ENSG00000169245/ENSG00000163735/ENSG00000125538/ENSG00000169248/ENSG00000115008/ENSG00000136244/ENSG00000137462/ENSG00000028277/ENSG00000163734/ENSG00000163131/ENSG00000154451/ENSG00000081041…
GO:0043207	response to external biotic stimulus	87	0.480853	2.04013	2.03474e-05	0.00294576	0.00267323	68	tags=43%, list=24%, signal=47%	ENSG00000007908/ENSG00000169429/ENSG00000232810/ENSG00000006210/ENSG00000124875/ENSG00000162692/ENSG00000108691/ENSG00000115009/ENSG00000163739/ENSG00000108342/ENSG00000169245/ENSG00000163735/ENSG00000125538/ENSG00000162892/ENSG00000166920/ENSG00000169248/ENSG00000115008/ENSG00000136244/ENSG00000137462/ENSG00000028277/ENSG00000163734/ENSG00000154451/ENSG00000081041/ENSG00000151651/ENSG00000166523…
GO:0051707	response to other organism	87	0.480853	2.04013	2.03474e-05	0.00294576	0.00267323	68	tags=43%, list=24%, signal=47%	ENSG00000007908/ENSG00000169429/ENSG00000232810/ENSG00000006210/ENSG00000124875/ENSG00000162692/ENSG00000108691/ENSG00000115009/ENSG00000163739/ENSG00000108342/ENSG00000169245/ENSG00000163735/ENSG00000125538/ENSG00000162892/ENSG00000166920/ENSG00000169248/ENSG00000115008/ENSG00000136244/ENSG00000137462/ENSG00000028277/ENSG00000163734/ENSG00000154451/ENSG00000081041/ENSG00000151651/ENSG00000166523…
GO:0033993	response to lipid	54	0.526948	2.13065	2.08161e-05	0.00294576	0.00267323	74	tags=52%, list=27%, signal=47%	ENSG00000007908/ENSG00000169429/ENSG00000232810/ENSG00000006210/ENSG00000124875/ENSG00000108691/ENSG00000136689/ENSG00000163739/ENSG00000108342/ENSG00000169245/ENSG00000163735/ENSG00000125538/ENSG00000162892/ENSG00000169248/ENSG00000115008/ENSG00000136244/ENSG00000137462/ENSG00000163734/ENSG00000081041/ENSG00000118503/ENSG00000226979/ENSG00000134070/ENSG00000168961/ENSG00000090339/ENSG00000163874…
GO:0009607	response to biotic stimulus	88	0.476346	2.02414	2.45571e-05	0.00338371	0.00307066	68	tags=42%, list=24%, signal=46%	ENSG00000007908/ENSG00000169429/ENSG00000232810/ENSG00000006210/ENSG00000124875/ENSG00000162692/ENSG00000108691/ENSG00000115009/ENSG00000163739/ENSG00000108342/ENSG00000169245/ENSG00000163735/ENSG00000125538/ENSG00000162892/ENSG00000166920/ENSG00000169248/ENSG00000115008/ENSG00000136244/ENSG00000137462/ENSG00000028277/ENSG00000163734/ENSG00000154451/ENSG00000081041/ENSG00000151651/ENSG00000166523…
GO:0050901	leukocyte tethering or rolling	3	0.981818	1.85714	2.95492e-05	0.00396717	0.00360014	8	tags=100%, list=3%, signal=98%	ENSG00000007908/ENSG00000232810/ENSG00000162692
GO:0007186	G protein-coupled receptor signaling pathway	21	0.62688	2.14209	6.28691e-05	0.00822957	0.00746819	70	tags=67%, list=25%, signal=54%	ENSG00000169429/ENSG00000006210/ENSG00000124875/ENSG00000108691/ENSG00000115009/ENSG00000163739/ENSG00000169245/ENSG00000163735/ENSG00000169248/ENSG00000163734/ENSG00000081041/ENSG00000125730/ENSG00000173432/ENSG00000064651
GO:0045321	leukocyte activation	61	0.481814	1.97444	6.67928e-05	0.00852993	0.00774077	68	tags=46%, list=24%, signal=44%	ENSG00000123610/ENSG00000169429/ENSG00000232810/ENSG00000006210/ENSG00000124875/ENSG00000162692/ENSG00000108691/ENSG00000204482/ENSG00000163739/ENSG00000125538/ENSG00000115008/ENSG00000136244/ENSG00000137462/ENSG00000028277/ENSG00000163131/ENSG00000151651/ENSG00000102524/ENSG00000166523/ENSG00000118503/ENSG00000168685/ENSG00000163661/ENSG00000168961/ENSG00000125730/ENSG00000104856/ENSG00000090339…
GO:0007166	cell surface receptor signaling pathway	114	0.431957	1.86063	0.000101265	0.0126244	0.0114564	69	tags=38%, list=25%, signal=48%	ENSG00000227507/ENSG00000169429/ENSG00000232810/ENSG00000006210/ENSG00000124875/ENSG00000162692/ENSG00000108691/ENSG00000134363/ENSG00000115009/ENSG00000136689/ENSG00000163739/ENSG00000108342/ENSG00000169245/ENSG00000163735/ENSG00000125538/ENSG00000162892/ENSG00000135919/ENSG00000169248/ENSG00000115008/ENSG00000123689/ENSG00000136244/ENSG00000153993/ENSG00000137462/ENSG00000163734/ENSG00000056558…
GO:1901099	negative regulation of signal transduction in absence of ligand	4	0.916058	1.90413	0.000117181	0.0138492	0.0125679	27	tags=100%, list=10%, signal=92%	ENSG00000232810/ENSG00000006210/ENSG00000125538/ENSG00000115008
GO:2001240	negative regulation of extrinsic apoptotic signaling pathway in absence of ligand	4	0.916058	1.90413	0.000117181	0.0138492	0.0125679	27	tags=100%, list=10%, signal=92%	ENSG00000232810/ENSG00000006210/ENSG00000125538/ENSG00000115008
GO:1901701	cellular response to oxygen-containing compound	52	0.5002	2.00968	0.000119025	0.0138492	0.0125679	67	tags=46%, list=24%, signal=43%	ENSG00000169429/ENSG00000232810/ENSG00000006210/ENSG00000124875/ENSG00000162692/ENSG00000108691/ENSG00000163739/ENSG00000108342/ENSG00000169245/ENSG00000163735/ENSG00000125538/ENSG00000162892/ENSG00000169248/ENSG00000115008/ENSG00000136244/ENSG00000137462/ENSG00000163734/ENSG00000081041/ENSG00000118503/ENSG00000112096/ENSG00000134070/ENSG00000090339/ENSG00000163874/ENSG00000173334
GO:0002376	immune system process	125	0.420429	1.81277	0.000135309	0.0151346	0.0137344	105	tags=50%, list=38%, signal=57%	ENSG00000007908/ENSG00000227507/ENSG00000123610/ENSG00000169429/ENSG00000232810/ENSG00000006210/ENSG00000124875/ENSG00000162692/ENSG00000108691/ENSG00000134363/ENSG00000204482/ENSG00000115009/ENSG00000136689/ENSG00000163739/ENSG00000108342/ENSG00000169245/ENSG00000163735/ENSG00000125538/ENSG00000169248/ENSG00000115008/ENSG00000136244/ENSG00000137462/ENSG00000028277/ENSG00000163734/ENSG00000163131…
GO:0044419	interspecies interaction between organisms	96	0.436556	1.86158	0.000135853	0.0151346	0.0137344	68	tags=39%, list=24%, signal=44%	ENSG00000007908/ENSG00000169429/ENSG00000232810/ENSG00000006210/ENSG00000124875/ENSG00000162692/ENSG00000108691/ENSG00000115009/ENSG00000163739/ENSG00000108342/ENSG00000169245/ENSG00000163735/ENSG00000125538/ENSG00000162892/ENSG00000166920/ENSG00000169248/ENSG00000115008/ENSG00000136244/ENSG00000137462/ENSG00000028277/ENSG00000163734/ENSG00000154451/ENSG00000081041/ENSG00000151651/ENSG00000166523…
GO:0006935	chemotaxis	40	0.525887	2.03495	0.000167291	0.0177073	0.0160691	61	tags=48%, list=22%, signal=43%	ENSG00000169429/ENSG00000006210/ENSG00000124875/ENSG00000108691/ENSG00000115009/ENSG00000163739/ENSG00000169245/ENSG00000163735/ENSG00000125538/ENSG00000169248/ENSG00000136244/ENSG00000153993/ENSG00000058085/ENSG00000163734/ENSG00000081041/ENSG00000151651/ENSG00000075213/ENSG00000168961/ENSG00000173432
GO:0042330	taxis	40	0.525887	2.03495	0.000167291	0.0177073	0.0160691	61	tags=48%, list=22%, signal=43%	ENSG00000169429/ENSG00000006210/ENSG00000124875/ENSG00000108691/ENSG00000115009/ENSG00000163739/ENSG00000169245/ENSG00000163735/ENSG00000125538/ENSG00000169248/ENSG00000136244/ENSG00000153993/ENSG00000058085/ENSG00000163734/ENSG00000081041/ENSG00000151651/ENSG00000075213/ENSG00000168961/ENSG00000173432
GO:0048566	embryonic digestive tract development	2	0.98913	1.6196	0.000169092	0.0177073	0.0160691	5	tags=100%, list=2%, signal=99%	ENSG00000169429/ENSG00000232810
GO:1903719	regulation of I-kappaB phosphorylation	2	0.985507	1.61367	0.00020161	0.0203006	0.0184224	6	tags=100%, list=2%, signal=99%	ENSG00000232810/ENSG00000006210
GO:1903721	positive regulation of I-kappaB phosphorylation	2	0.985507	1.61367	0.00020161	0.0203006	0.0184224	6	tags=100%, list=2%, signal=99%	ENSG00000232810/ENSG00000006210
GO:0072676	lymphocyte migration	10	0.73056	2.06261	0.000207446	0.0204941	0.018598	70	tags=90%, list=25%, signal=70%	ENSG00000006210/ENSG00000108691/ENSG00000115009/ENSG00000169245/ENSG00000169248/ENSG00000151651/ENSG00000090339/ENSG00000173432/ENSG00000064651
GO:0045123	cellular extravasation	8	0.78102	2.07885	0.000330753	0.0313285	0.0284301	9	tags=62%, list=3%, signal=62%	ENSG00000007908/ENSG00000232810/ENSG00000006210/ENSG00000162692/ENSG00000108691
GO:0007267	cell-cell signaling	52	0.485929	1.95234	0.000332125	0.0313285	0.0284301	72	tags=46%, list=26%, signal=42%	ENSG00000227507/ENSG00000123610/ENSG00000232810/ENSG00000006210/ENSG00000124875/ENSG00000108691/ENSG00000115009/ENSG00000136689/ENSG00000169245/ENSG00000163735/ENSG00000125538/ENSG00000135919/ENSG00000169248/ENSG00000115008/ENSG00000136244/ENSG00000137462/ENSG00000166523/ENSG00000118503/ENSG00000226979/ENSG00000125730/ENSG00000173432/ENSG00000138675/ENSG00000064651/ENSG00000122641
GO:1901700	response to oxygen-containing compound	66	0.456116	1.88741	0.000335064	0.0313285	0.0284301	83	tags=48%, list=30%, signal=45%	ENSG00000007908/ENSG00000169429/ENSG00000232810/ENSG00000006210/ENSG00000124875/ENSG00000162692/ENSG00000108691/ENSG00000163739/ENSG00000108342/ENSG00000169245/ENSG00000163735/ENSG00000125538/ENSG00000162892/ENSG00000169248/ENSG00000115008/ENSG00000136244/ENSG00000137462/ENSG00000163734/ENSG00000081041/ENSG00000118503/ENSG00000112096/ENSG00000226979/ENSG00000134070/ENSG00000168961/ENSG00000090339…
GO:0014015	positive regulation of gliogenesis	9	0.73374	2.00814	0.000362977	0.032836	0.0297981	52	tags=78%, list=19%, signal=65%	ENSG00000232810/ENSG00000006210/ENSG00000125538/ENSG00000135919/ENSG00000136244/ENSG00000137462/ENSG00000226979
GO:0051179	localization	146	0.410978	1.79076	0.00036373	0.032836	0.0297981	72	tags=36%, list=26%, signal=56%	ENSG00000007908/ENSG00000123610/ENSG00000169429/ENSG00000232810/ENSG00000006210/ENSG00000124875/ENSG00000162692/ENSG00000108691/ENSG00000115009/ENSG00000136689/ENSG00000163739/ENSG00000169245/ENSG00000163735/ENSG00000125538/ENSG00000162892/ENSG00000135919/ENSG00000166920/ENSG00000169248/ENSG00000115008/ENSG00000136244/ENSG00000153993/ENSG00000137462/ENSG00000028277/ENSG00000058085/ENSG00000163734…
GO:0150077	regulation of neuroinflammatory response	5	0.849859	1.93004	0.000384897	0.034158	0.0309978	29	tags=80%, list=10%, signal=73%	ENSG00000232810/ENSG00000006210/ENSG00000125538/ENSG00000136244
GO:0070555	response to interleukin-1	23	0.582357	2.03146	0.000423811	0.0369846	0.0335629	65	tags=57%, list=23%, signal=47%	ENSG00000007908/ENSG00000169429/ENSG00000006210/ENSG00000108691/ENSG00000115009/ENSG00000136689/ENSG00000125538/ENSG00000115008/ENSG00000136244/ENSG00000134070/ENSG00000168961/ENSG00000090339/ENSG00000163874
GO:0061900	glial cell activation	7	0.797497	2.03094	0.00045439	0.0381836	0.034651	33	tags=71%, list=12%, signal=65%	ENSG00000232810/ENSG00000006210/ENSG00000125538/ENSG00000136244/ENSG00000137462
GO:0150076	neuroinflammatory response	7	0.797497	2.03094	0.00045439	0.0381836	0.034651	33	tags=71%, list=12%, signal=65%	ENSG00000232810/ENSG00000006210/ENSG00000125538/ENSG00000136244/ENSG00000137462
GO:0002682	regulation of immune system process	66	0.450825	1.86552	0.000478377	0.0381836	0.034651	73	tags=44%, list=26%, signal=42%	ENSG00000007908/ENSG00000169429/ENSG00000232810/ENSG00000006210/ENSG00000124875/ENSG00000162692/ENSG00000108691/ENSG00000204482/ENSG00000115009/ENSG00000108342/ENSG00000169245/ENSG00000125538/ENSG00000115008/ENSG00000136244/ENSG00000154451/ENSG00000151651/ENSG00000102524/ENSG00000166523/ENSG00000118503/ENSG00000168685/ENSG00000226979/ENSG00000168961/ENSG00000125730/ENSG00000104856/ENSG00000090339…
GO:0051270	regulation of cellular component movement	52	0.479517	1.92658	0.000480812	0.0381836	0.034651	69	tags=46%, list=25%, signal=43%	ENSG00000007908/ENSG00000123610/ENSG00000169429/ENSG00000232810/ENSG00000006210/ENSG00000108691/ENSG00000115009/ENSG00000169245/ENSG00000125538/ENSG00000162892/ENSG00000135919/ENSG00000136244/ENSG00000153993/ENSG00000058085/ENSG00000151651/ENSG00000112096/ENSG00000075213/ENSG00000067798/ENSG00000168961/ENSG00000090339/ENSG00000163874/ENSG00000096696/ENSG00000173334/ENSG00000138675
GO:0030334	regulation of cell migration	50	0.481092	1.92763	0.000498469	0.0381836	0.034651	69	tags=46%, list=25%, signal=42%	ENSG00000007908/ENSG00000123610/ENSG00000169429/ENSG00000232810/ENSG00000006210/ENSG00000108691/ENSG00000115009/ENSG00000169245/ENSG00000125538/ENSG00000162892/ENSG00000135919/ENSG00000136244/ENSG00000153993/ENSG00000058085/ENSG00000151651/ENSG00000112096/ENSG00000075213/ENSG00000067798/ENSG00000168961/ENSG00000090339/ENSG00000163874/ENSG00000173334/ENSG00000138675
GO:0040012	regulation of locomotion	50	0.481092	1.92763	0.000498469	0.0381836	0.034651	69	tags=46%, list=25%, signal=42%	ENSG00000007908/ENSG00000123610/ENSG00000169429/ENSG00000232810/ENSG00000006210/ENSG00000108691/ENSG00000115009/ENSG00000169245/ENSG00000125538/ENSG00000162892/ENSG00000135919/ENSG00000136244/ENSG00000153993/ENSG00000058085/ENSG00000151651/ENSG00000112096/ENSG00000075213/ENSG00000067798/ENSG00000168961/ENSG00000090339/ENSG00000163874/ENSG00000173334/ENSG00000138675
GO:2000145	regulation of cell motility	50	0.481092	1.92763	0.000498469	0.0381836	0.034651	69	tags=46%, list=25%, signal=42%	ENSG00000007908/ENSG00000123610/ENSG00000169429/ENSG00000232810/ENSG00000006210/ENSG00000108691/ENSG00000115009/ENSG00000169245/ENSG00000125538/ENSG00000162892/ENSG00000135919/ENSG00000136244/ENSG00000153993/ENSG00000058085/ENSG00000151651/ENSG00000112096/ENSG00000075213/ENSG00000067798/ENSG00000168961/ENSG00000090339/ENSG00000163874/ENSG00000173334/ENSG00000138675
GO:0030154	cell differentiation	103	0.410761	1.75768	0.000501668	0.0381836	0.034651	78	tags=42%, list=28%, signal=48%	ENSG00000232810/ENSG00000006210/ENSG00000162692/ENSG00000108691/ENSG00000134363/ENSG00000204482/ENSG00000108342/ENSG00000169245/ENSG00000125538/ENSG00000135919/ENSG00000115008/ENSG00000136244/ENSG00000153993/ENSG00000211448/ENSG00000137462/ENSG00000028277/ENSG00000058085/ENSG00000185215/ENSG00000151651/ENSG00000166523/ENSG00000196878/ENSG00000168685/ENSG00000112096/ENSG00000075213/ENSG00000226979…
GO:0051240	positive regulation of multicellular organismal process	71	0.448257	1.87658	0.000503183	0.0381836	0.034651	77	tags=46%, list=28%, signal=45%	ENSG00000227507/ENSG00000169429/ENSG00000232810/ENSG00000006210/ENSG00000134363/ENSG00000108342/ENSG00000125538/ENSG00000135919/ENSG00000115008/ENSG00000123689/ENSG00000136244/ENSG00000211448/ENSG00000137462/ENSG00000028277/ENSG00000154451/ENSG00000151651/ENSG00000166523/ENSG00000101670/ENSG00000118503/ENSG00000168685/ENSG00000112096/ENSG00000075213/ENSG00000226979/ENSG00000168961/ENSG00000125730…
GO:0051050	positive regulation of transport	38	0.511891	1.95202	0.000567048	0.0424152	0.0384911	72	tags=53%, list=26%, signal=45%	ENSG00000007908/ENSG00000232810/ENSG00000006210/ENSG00000108691/ENSG00000169245/ENSG00000125538/ENSG00000169248/ENSG00000115008/ENSG00000136244/ENSG00000137462/ENSG00000163131/ENSG00000151651/ENSG00000166523/ENSG00000101670/ENSG00000163661/ENSG00000125730/ENSG00000173432/ENSG00000163874/ENSG00000064651/ENSG00000122641
GO:0048247	lymphocyte chemotaxis	9	0.724517	1.9829	0.000614653	0.0453285	0.0411348	70	tags=89%, list=25%, signal=69%	ENSG00000006210/ENSG00000108691/ENSG00000115009/ENSG00000169245/ENSG00000169248/ENSG00000151651/ENSG00000173432/ENSG00000064651
GO:0002685	regulation of leukocyte migration	20	0.588229	1.99777	0.000628695	0.0454643	0.0412581	60	tags=55%, list=22%, signal=46%	ENSG00000007908/ENSG00000169429/ENSG00000232810/ENSG00000006210/ENSG00000108691/ENSG00000115009/ENSG00000169245/ENSG00000136244/ENSG00000151651/ENSG00000168961/ENSG00000090339
GO:0007215	glutamate receptor signaling pathway	2	0.974638	1.59587	0.00065991	0.0454643	0.0412581	9	tags=100%, list=3%, signal=97%	ENSG00000006210/ENSG00000108691
GO:0036499	PERK-mediated unfolded protein response	2	0.974638	1.59587	0.00065991	0.0454643	0.0412581	9	tags=100%, list=3%, signal=97%	ENSG00000169429/ENSG00000108691
GO:0140467	integrated stress response signaling	2	0.974638	1.59587	0.00065991	0.0454643	0.0412581	9	tags=100%, list=3%, signal=97%	ENSG00000169429/ENSG00000108691
GO:1900449	regulation of glutamate receptor signaling pathway	2	0.974638	1.59587	0.00065991	0.0454643	0.0412581	9	tags=100%, list=3%, signal=97%	ENSG00000006210/ENSG00000108691
GO:0002377	immunoglobulin production	5	0.838828	1.90499	0.000684091	0.0465182	0.0422145	49	tags=100%, list=18%, signal=84%	ENSG00000232810/ENSG00000136244/ENSG00000028277/ENSG00000102524/ENSG00000168685
GO:0001819	positive regulation of cytokine production	28	0.544703	1.95085	0.00070486	0.047316	0.0429384	61	tags=54%, list=22%, signal=46%	ENSG00000227507/ENSG00000232810/ENSG00000006210/ENSG00000125538/ENSG00000115008/ENSG00000136244/ENSG00000137462/ENSG00000028277/ENSG00000154451/ENSG00000151651/ENSG00000166523/ENSG00000226979/ENSG00000168961/ENSG00000125730/ENSG00000173432
GO:0022409	positive regulation of cell-cell adhesion	26	0.541814	1.9197	0.000741099	0.0485844	0.0440895	60	tags=50%, list=22%, signal=43%	ENSG00000007908/ENSG00000232810/ENSG00000006210/ENSG00000162692/ENSG00000108691/ENSG00000125538/ENSG00000115008/ENSG00000136244/ENSG00000151651/ENSG00000102524/ENSG00000168685/ENSG00000168961/ENSG00000090339
GO:0050804	modulation of chemical synaptic transmission	9	0.719601	1.96944	0.000752516	0.0485844	0.0440895	23	tags=56%, list=8%, signal=53%	ENSG00000232810/ENSG00000006210/ENSG00000108691/ENSG00000125538/ENSG00000135919
GO:0099177	regulation of trans-synaptic signaling	9	0.719601	1.96944	0.000752516	0.0485844	0.0440895	23	tags=56%, list=8%, signal=53%	ENSG00000232810/ENSG00000006210/ENSG00000108691/ENSG00000125538/ENSG00000135919
GO:0002526	acute inflammatory response	12	0.676257	1.99823	0.000765814	0.0485844	0.0440895	61	tags=75%, list=22%, signal=61%	ENSG00000232810/ENSG00000125538/ENSG00000115008/ENSG00000136244/ENSG00000134339/ENSG00000151651/ENSG00000125730/ENSG00000090339/ENSG00000173432
GO:0006952	defense response	95	0.414733	1.76644	0.000770151	0.0485844	0.0440895	61	tags=35%, list=22%, signal=41%	ENSG00000007908/ENSG00000123610/ENSG00000169429/ENSG00000232810/ENSG00000006210/ENSG00000124875/ENSG00000162692/ENSG00000108691/ENSG00000115009/ENSG00000136689/ENSG00000163739/ENSG00000169245/ENSG00000163735/ENSG00000125538/ENSG00000169248/ENSG00000115008/ENSG00000136244/ENSG00000137462/ENSG00000163734/ENSG00000134339/ENSG00000154451/ENSG00000081041/ENSG00000151651/ENSG00000166523/ENSG00000118503…
GO:0050769	positive regulation of neurogenesis	12	0.67392	1.99132	0.000830989	0.0500121	0.0453852	52	tags=67%, list=19%, signal=57%	ENSG00000232810/ENSG00000006210/ENSG00000125538/ENSG00000135919/ENSG00000136244/ENSG00000137462/ENSG00000075213/ENSG00000226979
GO:0051222	positive regulation of protein transport	12	0.674171	1.99206	0.000830989	0.0500121	0.0453852	65	tags=75%, list=23%, signal=60%	ENSG00000232810/ENSG00000125538/ENSG00000115008/ENSG00000136244/ENSG00000137462/ENSG00000151651/ENSG00000166523/ENSG00000173432/ENSG00000163874
GO:0051962	positive regulation of nervous system development	12	0.67392	1.99132	0.000830989	0.0500121	0.0453852	52	tags=67%, list=19%, signal=57%	ENSG00000232810/ENSG00000006210/ENSG00000125538/ENSG00000135919/ENSG00000136244/ENSG00000137462/ENSG00000075213/ENSG00000226979
GO:1904951	positive regulation of establishment of protein localization	12	0.674171	1.99206	0.000830989	0.0500121	0.0453852	65	tags=75%, list=23%, signal=60%	ENSG00000232810/ENSG00000125538/ENSG00000115008/ENSG00000136244/ENSG00000137462/ENSG00000151651/ENSG00000166523/ENSG00000173432/ENSG00000163874
GO:0032940	secretion by cell	48	0.464512	1.86078	0.000918666	0.0531763	0.0482565	72	tags=48%, list=26%, signal=43%	ENSG00000123610/ENSG00000232810/ENSG00000136689/ENSG00000163739/ENSG00000125538/ENSG00000135919/ENSG00000115008/ENSG00000136244/ENSG00000137462/ENSG00000028277/ENSG00000163131/ENSG00000185215/ENSG00000151651/ENSG00000102524/ENSG00000166523/ENSG00000163661/ENSG00000168961/ENSG00000125730/ENSG00000173432/ENSG00000096696/ENSG00000171236/ENSG00000064651/ENSG00000122641
GO:0071310	cellular response to organic substance	108	0.412589	1.77078	0.00093429	0.0531763	0.0482565	72	tags=38%, list=26%, signal=46%	ENSG00000227507/ENSG00000169429/ENSG00000232810/ENSG00000006210/ENSG00000124875/ENSG00000162692/ENSG00000108691/ENSG00000134363/ENSG00000115009/ENSG00000136689/ENSG00000163739/ENSG00000108342/ENSG00000169245/ENSG00000163735/ENSG00000125538/ENSG00000162892/ENSG00000169248/ENSG00000115008/ENSG00000136244/ENSG00000137462/ENSG00000163734/ENSG00000056558/ENSG00000163131/ENSG00000154451/ENSG00000081041…
GO:0002687	positive regulation of leukocyte migration	17	0.607318	1.98362	0.000940179	0.0531763	0.0482565	60	tags=59%, list=22%, signal=49%	ENSG00000007908/ENSG00000169429/ENSG00000232810/ENSG00000006210/ENSG00000115009/ENSG00000169245/ENSG00000136244/ENSG00000151651/ENSG00000168961/ENSG00000090339
GO:0098742	cell-cell adhesion via plasma-membrane adhesion molecules	8	0.754794	2.00905	0.000942237	0.0531763	0.0482565	22	tags=62%, list=8%, signal=59%	ENSG00000007908/ENSG00000006210/ENSG00000162692/ENSG00000136689/ENSG00000159261
GO:0071674	mononuclear cell migration	12	0.668731	1.97599	0.000972201	0.0531763	0.0482565	29	tags=50%, list=10%, signal=47%	ENSG00000232810/ENSG00000006210/ENSG00000108691/ENSG00000115009/ENSG00000169245/ENSG00000136244
GO:0002548	monocyte chemotaxis	8	0.753468	2.00552	0.000988481	0.0531763	0.0482565	29	tags=62%, list=10%, signal=58%	ENSG00000006210/ENSG00000108691/ENSG00000115009/ENSG00000169245/ENSG00000136244
GO:0032675	regulation of interleukin-6 production	15	0.628457	1.99453	0.000997204	0.0531763	0.0482565	65	tags=67%, list=23%, signal=54%	ENSG00000232810/ENSG00000006210/ENSG00000125538/ENSG00000115008/ENSG00000136244/ENSG00000137462/ENSG00000028277/ENSG00000118503/ENSG00000168961/ENSG00000163874
GO:0050714	positive regulation of protein secretion	8	0.752658	2.00336	0.0010116	0.0531763	0.0482565	61	tags=88%, list=22%, signal=70%	ENSG00000232810/ENSG00000115008/ENSG00000136244/ENSG00000137462/ENSG00000151651/ENSG00000166523/ENSG00000173432
GO:0042635	positive regulation of hair cycle	2	0.971014	1.58994	0.00101609	0.0531763	0.0482565	10	tags=100%, list=4%, signal=97%	ENSG00000232810/ENSG00000134363
GO:0045684	positive regulation of epidermis development	2	0.971014	1.58994	0.00101609	0.0531763	0.0482565	10	tags=100%, list=4%, signal=97%	ENSG00000232810/ENSG00000134363
GO:0051797	regulation of hair follicle development	2	0.971014	1.58994	0.00101609	0.0531763	0.0482565	10	tags=100%, list=4%, signal=97%	ENSG00000232810/ENSG00000134363
GO:0051798	positive regulation of hair follicle development	2	0.971014	1.58994	0.00101609	0.0531763	0.0482565	10	tags=100%, list=4%, signal=97%	ENSG00000232810/ENSG00000134363
GO:0035249	synaptic transmission, glutamatergic	3	0.927273	1.75396	0.00102575	0.0531763	0.0482565	23	tags=100%, list=8%, signal=93%	ENSG00000232810/ENSG00000108691/ENSG00000135919
GO:0051966	regulation of synaptic transmission, glutamatergic	3	0.927273	1.75396	0.00102575	0.0531763	0.0482565	23	tags=100%, list=8%, signal=93%	ENSG00000232810/ENSG00000108691/ENSG00000135919
GO:0002684	positive regulation of immune system process	54	0.470527	1.90251	0.00103615	0.0531892	0.0482683	67	tags=44%, list=24%, signal=42%	ENSG00000007908/ENSG00000169429/ENSG00000232810/ENSG00000006210/ENSG00000162692/ENSG00000108691/ENSG00000115009/ENSG00000108342/ENSG00000169245/ENSG00000125538/ENSG00000115008/ENSG00000136244/ENSG00000154451/ENSG00000151651/ENSG00000102524/ENSG00000166523/ENSG00000168685/ENSG00000226979/ENSG00000168961/ENSG00000125730/ENSG00000104856/ENSG00000090339/ENSG00000163874/ENSG00000173334
GO:0032879	regulation of localization	91	0.411289	1.75002	0.00104739	0.0532442	0.0483182	72	tags=40%, list=26%, signal=44%	ENSG00000007908/ENSG00000123610/ENSG00000169429/ENSG00000232810/ENSG00000006210/ENSG00000108691/ENSG00000115009/ENSG00000169245/ENSG00000125538/ENSG00000162892/ENSG00000135919/ENSG00000169248/ENSG00000115008/ENSG00000136244/ENSG00000153993/ENSG00000137462/ENSG00000058085/ENSG00000163131/ENSG00000151651/ENSG00000166523/ENSG00000101670/ENSG00000112096/ENSG00000075213/ENSG00000067798/ENSG00000163661…
GO:0010033	response to organic substance	120	0.395991	1.7066	0.00109749	0.0552542	0.0501422	92	tags=44%, list=33%, signal=52%	ENSG00000007908/ENSG00000227507/ENSG00000169429/ENSG00000232810/ENSG00000006210/ENSG00000124875/ENSG00000162692/ENSG00000108691/ENSG00000134363/ENSG00000115009/ENSG00000136689/ENSG00000163739/ENSG00000108342/ENSG00000169245/ENSG00000163735/ENSG00000125538/ENSG00000162892/ENSG00000169248/ENSG00000115008/ENSG00000136244/ENSG00000137462/ENSG00000163734/ENSG00000056558/ENSG00000163131/ENSG00000154451…
GO:0006953	acute-phase response	6	0.797794	1.91727	0.0011185	0.0557757	0.0506155	61	tags=100%, list=22%, signal=80%	ENSG00000232810/ENSG00000125538/ENSG00000115008/ENSG00000136244/ENSG00000134339/ENSG00000173432
GO:0042221	response to chemical	136	0.396145	1.71873	0.00113438	0.0560339	0.0508498	70	tags=35%, list=25%, signal=51%	ENSG00000007908/ENSG00000227507/ENSG00000169429/ENSG00000232810/ENSG00000006210/ENSG00000124875/ENSG00000162692/ENSG00000108691/ENSG00000134363/ENSG00000115009/ENSG00000136689/ENSG00000163739/ENSG00000108342/ENSG00000169245/ENSG00000163735/ENSG00000125538/ENSG00000162892/ENSG00000169248/ENSG00000115008/ENSG00000136244/ENSG00000153993/ENSG00000137462/ENSG00000058085/ENSG00000163734/ENSG00000056558…
GO:0001817	regulation of cytokine production	45	0.478821	1.89347	0.00123284	0.0600342	0.05448	74	tags=51%, list=27%, signal=45%	ENSG00000227507/ENSG00000232810/ENSG00000006210/ENSG00000124875/ENSG00000125538/ENSG00000115008/ENSG00000136244/ENSG00000137462/ENSG00000028277/ENSG00000154451/ENSG00000151651/ENSG00000166523/ENSG00000118503/ENSG00000226979/ENSG00000067798/ENSG00000168961/ENSG00000125730/ENSG00000104856/ENSG00000173432/ENSG00000163874/ENSG00000122641/ENSG00000161940/ENSG00000077150
GO:0032635	interleukin-6 production	16	0.602291	1.94728	0.001247	0.0600342	0.05448	65	tags=62%, list=23%, signal=51%	ENSG00000232810/ENSG00000006210/ENSG00000125538/ENSG00000115008/ENSG00000136244/ENSG00000137462/ENSG00000028277/ENSG00000118503/ENSG00000168961/ENSG00000163874
GO:0046649	lymphocyte activation	34	0.508255	1.89579	0.00124976	0.0600342	0.05448	120	tags=79%, list=43%, signal=51%	ENSG00000162692/ENSG00000108691/ENSG00000204482/ENSG00000125538/ENSG00000115008/ENSG00000136244/ENSG00000028277/ENSG00000151651/ENSG00000102524/ENSG00000166523/ENSG00000118503/ENSG00000168685/ENSG00000168961/ENSG00000104856/ENSG00000090339/ENSG00000163874/ENSG00000122641/ENSG00000048052/ENSG00000196684/ENSG00000026508/ENSG00000104312/ENSG00000144802/ENSG00000146072/ENSG00000105639/ENSG00000110944…
GO:0070887	cellular response to chemical stimulus	115	0.408855	1.76226	0.00133861	0.0631626	0.057319	72	tags=37%, list=26%, signal=47%	ENSG00000227507/ENSG00000169429/ENSG00000232810/ENSG00000006210/ENSG00000124875/ENSG00000162692/ENSG00000108691/ENSG00000134363/ENSG00000115009/ENSG00000136689/ENSG00000163739/ENSG00000108342/ENSG00000169245/ENSG00000163735/ENSG00000125538/ENSG00000162892/ENSG00000169248/ENSG00000115008/ENSG00000136244/ENSG00000137462/ENSG00000163734/ENSG00000056558/ENSG00000163131/ENSG00000154451/ENSG00000081041…
GO:0051928	positive regulation of calcium ion transport	6	0.791341	1.90176	0.00133901	0.0631626	0.057319	26	tags=67%, list=9%, signal=62%	ENSG00000006210/ENSG00000108691/ENSG00000169245/ENSG00000169248
GO:0009893	positive regulation of metabolic process	100	0.400188	1.71021	0.0013982	0.0646573	0.0586754	74	tags=39%, list=27%, signal=45%	ENSG00000007908/ENSG00000227507/ENSG00000169429/ENSG00000232810/ENSG00000006210/ENSG00000108691/ENSG00000115009/ENSG00000108342/ENSG00000169245/ENSG00000125538/ENSG00000162892/ENSG00000115008/ENSG00000123689/ENSG00000136244/ENSG00000211448/ENSG00000137462/ENSG00000028277/ENSG00000056558/ENSG00000154451/ENSG00000151651/ENSG00000166523/ENSG00000118503/ENSG00000168685/ENSG00000075213/ENSG00000226979…
GO:0051281	positive regulation of release of sequestered calcium ion into cytosol	3	0.916364	1.73333	0.00140774	0.0646573	0.0586754	26	tags=100%, list=9%, signal=92%	ENSG00000006210/ENSG00000169245/ENSG00000169248
GO:1904427	positive regulation of calcium ion transmembrane transport	3	0.916364	1.73333	0.00140774	0.0646573	0.0586754	26	tags=100%, list=9%, signal=92%	ENSG00000006210/ENSG00000169245/ENSG00000169248
GO:0071347	cellular response to interleukin-1	20	0.567471	1.92727	0.00146259	0.0665923	0.0604313	65	tags=55%, list=23%, signal=45%	ENSG00000169429/ENSG00000006210/ENSG00000108691/ENSG00000115009/ENSG00000136689/ENSG00000125538/ENSG00000115008/ENSG00000136244/ENSG00000134070/ENSG00000090339/ENSG00000163874
GO:2001236	regulation of extrinsic apoptotic signaling pathway	12	0.65441	1.93367	0.00153919	0.0694759	0.0630482	83	tags=83%, list=30%, signal=61%	ENSG00000232810/ENSG00000006210/ENSG00000125538/ENSG00000115008/ENSG00000123689/ENSG00000056558/ENSG00000118503/ENSG00000090339/ENSG00000122641/ENSG00000121858
GO:0006950	response to stress	129	0.391672	1.69128	0.00167095	0.0747784	0.0678601	82	tags=40%, list=29%, signal=52%	ENSG00000007908/ENSG00000123610/ENSG00000169429/ENSG00000232810/ENSG00000006210/ENSG00000124875/ENSG00000162692/ENSG00000108691/ENSG00000115009/ENSG00000136689/ENSG00000163739/ENSG00000169245/ENSG00000163735/ENSG00000125538/ENSG00000162892/ENSG00000135919/ENSG00000169248/ENSG00000115008/ENSG00000136244/ENSG00000105825/ENSG00000137462/ENSG00000163734/ENSG00000134339/ENSG00000056558/ENSG00000154451…
GO:0001660	fever generation	3	0.912727	1.72645	0.00169196	0.075077	0.0681311	27	tags=100%, list=10%, signal=91%	ENSG00000232810/ENSG00000125538/ENSG00000115008
GO:0001816	cytokine production	48	0.450355	1.80407	0.00177142	0.077601	0.0704215	74	tags=48%, list=27%, signal=42%	ENSG00000227507/ENSG00000232810/ENSG00000006210/ENSG00000124875/ENSG00000125538/ENSG00000115008/ENSG00000136244/ENSG00000137462/ENSG00000028277/ENSG00000154451/ENSG00000151651/ENSG00000166523/ENSG00000118503/ENSG00000226979/ENSG00000067798/ENSG00000168961/ENSG00000125730/ENSG00000104856/ENSG00000173432/ENSG00000163874/ENSG00000122641/ENSG00000161940/ENSG00000077150
GO:0048305	immunoglobulin secretion	4	0.854015	1.77517	0.00177848	0.077601	0.0704215	44	tags=100%, list=16%, signal=85%	ENSG00000232810/ENSG00000136244/ENSG00000028277/ENSG00000102524
GO:0140352	export from cell	49	0.452389	1.81373	0.00186136	0.0801114	0.0726997	72	tags=47%, list=26%, signal=42%	ENSG00000123610/ENSG00000232810/ENSG00000136689/ENSG00000163739/ENSG00000125538/ENSG00000135919/ENSG00000115008/ENSG00000136244/ENSG00000137462/ENSG00000028277/ENSG00000163131/ENSG00000185215/ENSG00000151651/ENSG00000102524/ENSG00000166523/ENSG00000163661/ENSG00000168961/ENSG00000125730/ENSG00000173432/ENSG00000096696/ENSG00000171236/ENSG00000064651/ENSG00000122641
GO:0048522	positive regulation of cellular process	140	0.373693	1.62987	0.00187217	0.0801114	0.0726997	70	tags=34%, list=25%, signal=51%	ENSG00000007908/ENSG00000123610/ENSG00000169429/ENSG00000232810/ENSG00000006210/ENSG00000162692/ENSG00000108691/ENSG00000115009/ENSG00000108342/ENSG00000169245/ENSG00000163735/ENSG00000125538/ENSG00000162892/ENSG00000135919/ENSG00000169248/ENSG00000115008/ENSG00000123689/ENSG00000136244/ENSG00000153993/ENSG00000137462/ENSG00000028277/ENSG00000058085/ENSG00000056558/ENSG00000163131/ENSG00000154451…
GO:0002793	positive regulation of peptide secretion	9	0.694071	1.89957	0.00188191	0.0801114	0.0726997	61	tags=78%, list=22%, signal=63%	ENSG00000232810/ENSG00000115008/ENSG00000136244/ENSG00000137462/ENSG00000151651/ENSG00000166523/ENSG00000173432
GO:0048869	cellular developmental process	106	0.394563	1.69089	0.00191499	0.0803078	0.0728779	78	tags=41%, list=28%, signal=47%	ENSG00000232810/ENSG00000006210/ENSG00000162692/ENSG00000108691/ENSG00000134363/ENSG00000204482/ENSG00000108342/ENSG00000169245/ENSG00000125538/ENSG00000135919/ENSG00000115008/ENSG00000136244/ENSG00000153993/ENSG00000211448/ENSG00000137462/ENSG00000028277/ENSG00000058085/ENSG00000185215/ENSG00000151651/ENSG00000166523/ENSG00000196878/ENSG00000168685/ENSG00000112096/ENSG00000075213/ENSG00000226979…
GO:0034612	response to tumor necrosis factor	27	0.519665	1.84877	0.00191943	0.0803078	0.0728779	65	tags=48%, list=23%, signal=41%	ENSG00000007908/ENSG00000227507/ENSG00000169429/ENSG00000232810/ENSG00000006210/ENSG00000108691/ENSG00000115009/ENSG00000056558/ENSG00000102524/ENSG00000118503/ENSG00000226979/ENSG00000090339/ENSG00000163874
GO:2001239	regulation of extrinsic apoptotic signaling pathway in absence of ligand	5	0.813881	1.84833	0.00194032	0.0803078	0.0728779	27	tags=80%, list=10%, signal=74%	ENSG00000232810/ENSG00000006210/ENSG00000125538/ENSG00000115008
GO:0150078	positive regulation of neuroinflammatory response	3	0.905455	1.71269	0.00194788	0.0803078	0.0728779	29	tags=100%, list=10%, signal=91%	ENSG00000232810/ENSG00000125538/ENSG00000136244
GO:0002443	leukocyte mediated immunity	37	0.478699	1.81753	0.00198267	0.0811036	0.0736001	68	tags=49%, list=24%, signal=42%	ENSG00000123610/ENSG00000232810/ENSG00000124875/ENSG00000163739/ENSG00000125538/ENSG00000136244/ENSG00000137462/ENSG00000028277/ENSG00000163131/ENSG00000151651/ENSG00000168685/ENSG00000226979/ENSG00000163661/ENSG00000168961/ENSG00000125730/ENSG00000090339/ENSG00000096696/ENSG00000171236
GO:1903039	positive regulation of leukocyte cell-cell adhesion	23	0.546093	1.90496	0.00200891	0.0813776	0.0738488	60	tags=52%, list=22%, signal=45%	ENSG00000007908/ENSG00000232810/ENSG00000162692/ENSG00000108691/ENSG00000125538/ENSG00000115008/ENSG00000136244/ENSG00000151651/ENSG00000102524/ENSG00000168685/ENSG00000168961/ENSG00000090339
GO:0007165	signal transduction	152	0.385506	1.68361	0.00202045	0.0813776	0.0738488	90	tags=41%, list=32%, signal=61%	ENSG00000007908/ENSG00000227507/ENSG00000123610/ENSG00000169429/ENSG00000232810/ENSG00000006210/ENSG00000124875/ENSG00000162692/ENSG00000108691/ENSG00000134363/ENSG00000115009/ENSG00000136689/ENSG00000163739/ENSG00000108342/ENSG00000169245/ENSG00000163735/ENSG00000125538/ENSG00000162892/ENSG00000135919/ENSG00000169248/ENSG00000115008/ENSG00000123689/ENSG00000136244/ENSG00000153993/ENSG00000137462…
GO:0002520	immune system development	43	0.464908	1.81636	0.00206807	0.0826595	0.0750121	78	tags=51%, list=28%, signal=44%	ENSG00000227507/ENSG00000232810/ENSG00000162692/ENSG00000134363/ENSG00000108342/ENSG00000125538/ENSG00000115008/ENSG00000136244/ENSG00000137462/ENSG00000028277/ENSG00000151651/ENSG00000166523/ENSG00000118503/ENSG00000168685/ENSG00000226979/ENSG00000168961/ENSG00000104856/ENSG00000163874/ENSG00000173334/ENSG00000122641/ENSG00000077150/ENSG00000168062
GO:0048708	astrocyte differentiation	6	0.779451	1.87319	0.00210063	0.0830799	0.0753936	29	tags=67%, list=10%, signal=61%	ENSG00000232810/ENSG00000125538/ENSG00000135919/ENSG00000136244
GO:0009306	protein secretion	21	0.549721	1.87844	0.00214205	0.0830799	0.0753936	45	tags=48%, list=16%, signal=43%	ENSG00000232810/ENSG00000136689/ENSG00000125538/ENSG00000115008/ENSG00000136244/ENSG00000137462/ENSG00000028277/ENSG00000151651/ENSG00000102524/ENSG00000166523
GO:0035592	establishment of protein localization to extracellular region	21	0.549721	1.87844	0.00214205	0.0830799	0.0753936	45	tags=48%, list=16%, signal=43%	ENSG00000232810/ENSG00000136689/ENSG00000125538/ENSG00000115008/ENSG00000136244/ENSG00000137462/ENSG00000028277/ENSG00000151651/ENSG00000102524/ENSG00000166523
GO:0071692	protein localization to extracellular region	21	0.549721	1.87844	0.00214205	0.0830799	0.0753936	45	tags=48%, list=16%, signal=43%	ENSG00000232810/ENSG00000136689/ENSG00000125538/ENSG00000115008/ENSG00000136244/ENSG00000137462/ENSG00000028277/ENSG00000151651/ENSG00000102524/ENSG00000166523
GO:0043410	positive regulation of MAPK cascade	27	0.515683	1.83461	0.00219601	0.0845465	0.0767244	65	tags=52%, list=23%, signal=44%	ENSG00000232810/ENSG00000006210/ENSG00000108691/ENSG00000115009/ENSG00000125538/ENSG00000136244/ENSG00000056558/ENSG00000151651/ENSG00000075213/ENSG00000134070/ENSG00000168961/ENSG00000090339/ENSG00000173432/ENSG00000163874
GO:0022411	cellular component disassembly	9	0.689981	1.88838	0.00222827	0.0851624	0.0772834	58	tags=78%, list=21%, signal=64%	ENSG00000232810/ENSG00000006210/ENSG00000136244/ENSG00000163131/ENSG00000151651/ENSG00000067798/ENSG00000125730
GO:0098609	cell-cell adhesion	40	0.474449	1.83591	0.00227176	0.0861951	0.0782206	66	tags=45%, list=24%, signal=40%	ENSG00000007908/ENSG00000232810/ENSG00000006210/ENSG00000162692/ENSG00000108691/ENSG00000136689/ENSG00000125538/ENSG00000159261/ENSG00000135919/ENSG00000115008/ENSG00000136244/ENSG00000151651/ENSG00000102524/ENSG00000168685/ENSG00000168961/ENSG00000090339/ENSG00000163874/ENSG00000096696
GO:0008285	negative regulation of cell population proliferation	36	0.484438	1.83086	0.002334	0.0879196	0.0797855	72	tags=50%, list=26%, signal=43%	ENSG00000169429/ENSG00000232810/ENSG00000108691/ENSG00000204482/ENSG00000163739/ENSG00000125538/ENSG00000162892/ENSG00000135919/ENSG00000115008/ENSG00000136244/ENSG00000137462/ENSG00000118503/ENSG00000112096/ENSG00000226979/ENSG00000168961/ENSG00000163132/ENSG00000173334/ENSG00000122641
GO:0030098	lymphocyte differentiation	20	0.558538	1.89693	0.0023797	0.08861	0.080412	120	tags=90%, list=43%, signal=55%	ENSG00000162692/ENSG00000125538/ENSG00000115008/ENSG00000136244/ENSG00000028277/ENSG00000151651/ENSG00000166523/ENSG00000168685/ENSG00000168961/ENSG00000104856/ENSG00000163874/ENSG00000122641/ENSG00000048052/ENSG00000104312/ENSG00000144802/ENSG00000105639/ENSG00000110944/ENSG00000125347
GO:0051239	regulation of multicellular organismal process	113	0.388875	1.67545	0.00239356	0.08861	0.080412	74	tags=38%, list=27%, signal=47%	ENSG00000227507/ENSG00000169429/ENSG00000232810/ENSG00000006210/ENSG00000124875/ENSG00000134363/ENSG00000136689/ENSG00000108342/ENSG00000169245/ENSG00000125538/ENSG00000135919/ENSG00000115008/ENSG00000123689/ENSG00000136244/ENSG00000153993/ENSG00000211448/ENSG00000137462/ENSG00000028277/ENSG00000154451/ENSG00000151651/ENSG00000166523/ENSG00000101670/ENSG00000118503/ENSG00000168685/ENSG00000112096…
GO:0001774	microglial cell activation	6	0.773802	1.85961	0.00242002	0.08861	0.080412	33	tags=67%, list=12%, signal=60%	ENSG00000232810/ENSG00000006210/ENSG00000136244/ENSG00000137462
GO:0002269	leukocyte activation involved in inflammatory response	6	0.773802	1.85961	0.00242002	0.08861	0.080412	33	tags=67%, list=12%, signal=60%	ENSG00000232810/ENSG00000006210/ENSG00000136244/ENSG00000137462
GO:0010573	vascular endothelial growth factor production	5	0.805861	1.83012	0.00248	0.0901757	0.0818329	58	tags=100%, list=21%, signal=81%	ENSG00000232810/ENSG00000125538/ENSG00000115008/ENSG00000136244/ENSG00000125730
GO:0022407	regulation of cell-cell adhesion	34	0.494563	1.84472	0.0025508	0.0916373	0.0831592	65	tags=47%, list=23%, signal=41%	ENSG00000007908/ENSG00000232810/ENSG00000006210/ENSG00000162692/ENSG00000108691/ENSG00000136689/ENSG00000125538/ENSG00000135919/ENSG00000115008/ENSG00000136244/ENSG00000151651/ENSG00000102524/ENSG00000168685/ENSG00000168961/ENSG00000090339/ENSG00000163874
GO:0030335	positive regulation of cell migration	38	0.481958	1.83788	0.00263713	0.0916373	0.0831592	65	tags=45%, list=23%, signal=40%	ENSG00000007908/ENSG00000123610/ENSG00000169429/ENSG00000232810/ENSG00000006210/ENSG00000115009/ENSG00000169245/ENSG00000125538/ENSG00000136244/ENSG00000153993/ENSG00000058085/ENSG00000151651/ENSG00000112096/ENSG00000075213/ENSG00000168961/ENSG00000090339/ENSG00000163874
GO:0040017	positive regulation of locomotion	38	0.481958	1.83788	0.00263713	0.0916373	0.0831592	65	tags=45%, list=23%, signal=40%	ENSG00000007908/ENSG00000123610/ENSG00000169429/ENSG00000232810/ENSG00000006210/ENSG00000115009/ENSG00000169245/ENSG00000125538/ENSG00000136244/ENSG00000153993/ENSG00000058085/ENSG00000151651/ENSG00000112096/ENSG00000075213/ENSG00000168961/ENSG00000090339/ENSG00000163874
GO:0051272	positive regulation of cellular component movement	38	0.481958	1.83788	0.00263713	0.0916373	0.0831592	65	tags=45%, list=23%, signal=40%	ENSG00000007908/ENSG00000123610/ENSG00000169429/ENSG00000232810/ENSG00000006210/ENSG00000115009/ENSG00000169245/ENSG00000125538/ENSG00000136244/ENSG00000153993/ENSG00000058085/ENSG00000151651/ENSG00000112096/ENSG00000075213/ENSG00000168961/ENSG00000090339/ENSG00000163874
GO:2000147	positive regulation of cell motility	38	0.481958	1.83788	0.00263713	0.0916373	0.0831592	65	tags=45%, list=23%, signal=40%	ENSG00000007908/ENSG00000123610/ENSG00000169429/ENSG00000232810/ENSG00000006210/ENSG00000115009/ENSG00000169245/ENSG00000125538/ENSG00000136244/ENSG00000153993/ENSG00000058085/ENSG00000151651/ENSG00000112096/ENSG00000075213/ENSG00000168961/ENSG00000090339/ENSG00000163874
GO:0032602	chemokine production	7	0.742654	1.89127	0.00268959	0.0916373	0.0831592	57	tags=86%, list=21%, signal=70%	ENSG00000232810/ENSG00000124875/ENSG00000125538/ENSG00000136244/ENSG00000137462/ENSG00000168961
GO:0032642	regulation of chemokine production	7	0.742654	1.89127	0.00268959	0.0916373	0.0831592	57	tags=86%, list=21%, signal=70%	ENSG00000232810/ENSG00000124875/ENSG00000125538/ENSG00000136244/ENSG00000137462/ENSG00000168961
GO:0033209	tumor necrosis factor-mediated signaling pathway	9	0.68258	1.86812	0.002715	0.0916373	0.0831592	52	tags=67%, list=19%, signal=56%	ENSG00000227507/ENSG00000232810/ENSG00000056558/ENSG00000102524/ENSG00000118503/ENSG00000226979
GO:0023052	signaling	160	0.376698	1.64217	0.00279616	0.0916373	0.0831592	90	tags=40%, list=32%, signal=64%	ENSG00000007908/ENSG00000227507/ENSG00000123610/ENSG00000169429/ENSG00000232810/ENSG00000006210/ENSG00000124875/ENSG00000162692/ENSG00000108691/ENSG00000134363/ENSG00000115009/ENSG00000136689/ENSG00000163739/ENSG00000108342/ENSG00000169245/ENSG00000163735/ENSG00000125538/ENSG00000162892/ENSG00000135919/ENSG00000169248/ENSG00000115008/ENSG00000123689/ENSG00000136244/ENSG00000153993/ENSG00000137462…
GO:0002437	inflammatory response to antigenic stimulus	5	0.798535	1.81348	0.00281511	0.0916373	0.0831592	60	tags=100%, list=22%, signal=80%	ENSG00000232810/ENSG00000136689/ENSG00000226979/ENSG00000125730/ENSG00000090339
GO:0033077	T cell differentiation in thymus	4	0.835766	1.73723	0.00282201	0.0916373	0.0831592	49	tags=100%, list=18%, signal=84%	ENSG00000125538/ENSG00000115008/ENSG00000151651/ENSG00000168685
GO:0033081	regulation of T cell differentiation in thymus	4	0.835766	1.73723	0.00282201	0.0916373	0.0831592	49	tags=100%, list=18%, signal=84%	ENSG00000125538/ENSG00000115008/ENSG00000151651/ENSG00000168685
GO:0033089	positive regulation of T cell differentiation in thymus	4	0.835766	1.73723	0.00282201	0.0916373	0.0831592	49	tags=100%, list=18%, signal=84%	ENSG00000125538/ENSG00000115008/ENSG00000151651/ENSG00000168685
GO:0007268	chemical synaptic transmission	11	0.661261	1.91469	0.00283684	0.0916373	0.0831592	23	tags=45%, list=8%, signal=43%	ENSG00000232810/ENSG00000006210/ENSG00000108691/ENSG00000125538/ENSG00000135919
GO:0098916	anterograde trans-synaptic signaling	11	0.661261	1.91469	0.00283684	0.0916373	0.0831592	23	tags=45%, list=8%, signal=43%	ENSG00000232810/ENSG00000006210/ENSG00000108691/ENSG00000125538/ENSG00000135919
GO:0099536	synaptic signaling	11	0.661261	1.91469	0.00283684	0.0916373	0.0831592	23	tags=45%, list=8%, signal=43%	ENSG00000232810/ENSG00000006210/ENSG00000108691/ENSG00000125538/ENSG00000135919
GO:0099537	trans-synaptic signaling	11	0.661261	1.91469	0.00283684	0.0916373	0.0831592	23	tags=45%, list=8%, signal=43%	ENSG00000232810/ENSG00000006210/ENSG00000108691/ENSG00000125538/ENSG00000135919
GO:0008283	cell population proliferation	81	0.40963	1.72273	0.00284172	0.0916373	0.0831592	73	tags=40%, list=26%, signal=41%	ENSG00000169429/ENSG00000232810/ENSG00000006210/ENSG00000162692/ENSG00000108691/ENSG00000134363/ENSG00000204482/ENSG00000163739/ENSG00000108342/ENSG00000169245/ENSG00000163735/ENSG00000125538/ENSG00000162892/ENSG00000135919/ENSG00000169248/ENSG00000115008/ENSG00000136244/ENSG00000137462/ENSG00000058085/ENSG00000102524/ENSG00000101670/ENSG00000118503/ENSG00000168685/ENSG00000112096/ENSG00000226979…
GO:0051091	positive regulation of DNA-binding transcription factor activity	21	0.541108	1.849	0.00286272	0.0916373	0.0831592	60	tags=52%, list=22%, signal=44%	ENSG00000232810/ENSG00000006210/ENSG00000108342/ENSG00000125538/ENSG00000136244/ENSG00000137462/ENSG00000056558/ENSG00000151651/ENSG00000134070/ENSG00000168961/ENSG00000090339
GO:0048518	positive regulation of biological process	156	0.388129	1.69086	0.00287023	0.0916373	0.0831592	72	tags=34%, list=26%, signal=57%	ENSG00000007908/ENSG00000227507/ENSG00000123610/ENSG00000169429/ENSG00000232810/ENSG00000006210/ENSG00000162692/ENSG00000108691/ENSG00000134363/ENSG00000115009/ENSG00000108342/ENSG00000169245/ENSG00000163735/ENSG00000125538/ENSG00000162892/ENSG00000135919/ENSG00000169248/ENSG00000115008/ENSG00000123689/ENSG00000136244/ENSG00000153993/ENSG00000211448/ENSG00000137462/ENSG00000028277/ENSG00000058085…
GO:0046903	secretion	50	0.443873	1.7785	0.0029169	0.0925629	0.0839992	72	tags=46%, list=26%, signal=42%	ENSG00000123610/ENSG00000232810/ENSG00000136689/ENSG00000163739/ENSG00000125538/ENSG00000135919/ENSG00000115008/ENSG00000136244/ENSG00000137462/ENSG00000028277/ENSG00000163131/ENSG00000185215/ENSG00000151651/ENSG00000102524/ENSG00000166523/ENSG00000163661/ENSG00000168961/ENSG00000125730/ENSG00000173432/ENSG00000096696/ENSG00000171236/ENSG00000064651/ENSG00000122641
GO:0042127	regulation of cell population proliferation	75	0.407778	1.70693	0.00304578	0.0960705	0.0871823	73	tags=40%, list=26%, signal=40%	ENSG00000169429/ENSG00000232810/ENSG00000006210/ENSG00000162692/ENSG00000108691/ENSG00000204482/ENSG00000163739/ENSG00000108342/ENSG00000169245/ENSG00000163735/ENSG00000125538/ENSG00000162892/ENSG00000135919/ENSG00000169248/ENSG00000115008/ENSG00000136244/ENSG00000137462/ENSG00000058085/ENSG00000102524/ENSG00000118503/ENSG00000168685/ENSG00000112096/ENSG00000226979/ENSG00000168961/ENSG00000163132…
GO:0010604	positive regulation of macromolecule metabolic process	94	0.384422	1.63683	0.00318242	0.0997793	0.090548	74	tags=38%, list=27%, signal=42%	ENSG00000007908/ENSG00000227507/ENSG00000169429/ENSG00000232810/ENSG00000006210/ENSG00000108691/ENSG00000115009/ENSG00000108342/ENSG00000169245/ENSG00000125538/ENSG00000162892/ENSG00000115008/ENSG00000136244/ENSG00000137462/ENSG00000028277/ENSG00000056558/ENSG00000154451/ENSG00000151651/ENSG00000166523/ENSG00000118503/ENSG00000168685/ENSG00000075213/ENSG00000226979/ENSG00000134070/ENSG00000168961…
GO:1904064	positive regulation of cation transmembrane transport	7	0.736461	1.8755	0.00326082	0.101629	0.0922264	39	tags=71%, list=14%, signal=63%	ENSG00000006210/ENSG00000108691/ENSG00000169245/ENSG00000169248/ENSG00000163131
GO:0014013	regulation of gliogenesis	11	0.657194	1.90291	0.00328358	0.101733	0.0923207	52	tags=64%, list=19%, signal=54%	ENSG00000232810/ENSG00000006210/ENSG00000125538/ENSG00000135919/ENSG00000136244/ENSG00000137462/ENSG00000226979
GO:0033554	cellular response to stress	44	0.45434	1.77953	0.00332367	0.102369	0.092898	67	tags=45%, list=24%, signal=41%	ENSG00000169429/ENSG00000232810/ENSG00000108691/ENSG00000169245/ENSG00000125538/ENSG00000115008/ENSG00000136244/ENSG00000105825/ENSG00000056558/ENSG00000151651/ENSG00000118503/ENSG00000112096/ENSG00000075213/ENSG00000134070/ENSG00000168961/ENSG00000104856/ENSG00000090339/ENSG00000163132/ENSG00000163874/ENSG00000173334
GO:0048583	regulation of response to stimulus	130	0.379591	1.63784	0.0033584	0.102834	0.0933198	77	tags=37%, list=28%, signal=50%	ENSG00000007908/ENSG00000123610/ENSG00000169429/ENSG00000232810/ENSG00000006210/ENSG00000124875/ENSG00000162692/ENSG00000108691/ENSG00000134363/ENSG00000115009/ENSG00000136689/ENSG00000108342/ENSG00000169245/ENSG00000125538/ENSG00000162892/ENSG00000135919/ENSG00000115008/ENSG00000123689/ENSG00000136244/ENSG00000153993/ENSG00000137462/ENSG00000056558/ENSG00000154451/ENSG00000151651/ENSG00000102524…
GO:0045661	regulation of myoblast differentiation	2	0.945652	1.54841	0.00341528	0.103087	0.0935501	17	tags=100%, list=6%, signal=95%	ENSG00000232810/ENSG00000169245
GO:0045662	negative regulation of myoblast differentiation	2	0.945652	1.54841	0.00341528	0.103087	0.0935501	17	tags=100%, list=6%, signal=95%	ENSG00000232810/ENSG00000169245
GO:0051716	cellular response to stimulus	168	0.377634	1.64411	0.00342575	0.103087	0.0935501	145	tags=61%, list=52%, signal=74%	ENSG00000007908/ENSG00000227507/ENSG00000123610/ENSG00000169429/ENSG00000232810/ENSG00000006210/ENSG00000124875/ENSG00000162692/ENSG00000108691/ENSG00000134363/ENSG00000115009/ENSG00000136689/ENSG00000163739/ENSG00000108342/ENSG00000169245/ENSG00000163735/ENSG00000125538/ENSG00000162892/ENSG00000135919/ENSG00000169248/ENSG00000115008/ENSG00000123689/ENSG00000136244/ENSG00000153993/ENSG00000105825…
GO:0032611	interleukin-1 beta production	11	0.655664	1.89848	0.00346228	0.103591	0.0940073	65	tags=73%, list=23%, signal=58%	ENSG00000232810/ENSG00000006210/ENSG00000125538/ENSG00000136244/ENSG00000154451/ENSG00000118503/ENSG00000168961/ENSG00000163874
GO:0010524	positive regulation of calcium ion transport into cytosol	4	0.831585	1.72854	0.00357452	0.106342	0.0965036	26	tags=75%, list=9%, signal=69%	ENSG00000006210/ENSG00000169245/ENSG00000169248
GO:0051279	regulation of release of sequestered calcium ion into cytosol	4	0.829913	1.72507	0.00368203	0.108921	0.0988443	26	tags=75%, list=9%, signal=69%	ENSG00000006210/ENSG00000169245/ENSG00000169248
GO:0120163	negative regulation of cold-induced thermogenesis	2	-0.963768	-1.70369	0.0038147	0.112212	0.101831	13	tags=100%, list=5%, signal=96%	ENSG00000113389
GO:0007043	cell-cell junction assembly	4	0.827809	1.72069	0.00389703	0.11336	0.102873	22	tags=75%, list=8%, signal=70%	ENSG00000232810/ENSG00000125538/ENSG00000159261
GO:0050806	positive regulation of synaptic transmission	4	0.826536	1.71805	0.00389703	0.11336	0.102873	23	tags=75%, list=8%, signal=70%	ENSG00000232810/ENSG00000108691/ENSG00000135919
GO:0002274	myeloid leukocyte activation	37	0.464982	1.76545	0.00398492	0.114578	0.103977	68	tags=46%, list=24%, signal=40%	ENSG00000123610/ENSG00000169429/ENSG00000232810/ENSG00000006210/ENSG00000124875/ENSG00000163739/ENSG00000136244/ENSG00000137462/ENSG00000163131/ENSG00000151651/ENSG00000163661/ENSG00000168961/ENSG00000125730/ENSG00000104856/ENSG00000163874/ENSG00000096696/ENSG00000171236
GO:0072678	T cell migration	8	0.712845	1.89739	0.00399307	0.114578	0.103977	70	tags=88%, list=25%, signal=67%	ENSG00000108691/ENSG00000115009/ENSG00000169245/ENSG00000169248/ENSG00000151651/ENSG00000090339/ENSG00000064651
GO:0048143	astrocyte activation	4	0.825132	1.71513	0.00400453	0.114578	0.103977	29	tags=75%, list=10%, signal=68%	ENSG00000232810/ENSG00000125538/ENSG00000136244
GO:0031663	lipopolysaccharide-mediated signaling pathway	12	0.625477	1.84818	0.00405894	0.115503	0.104817	67	tags=67%, list=24%, signal=53%	ENSG00000232810/ENSG00000006210/ENSG00000108691/ENSG00000125538/ENSG00000137462/ENSG00000118503/ENSG00000134070/ENSG00000173334
GO:1903037	regulation of leukocyte cell-cell adhesion	27	0.493643	1.75619	0.00409562	0.115917	0.105193	120	tags=78%, list=43%, signal=49%	ENSG00000007908/ENSG00000232810/ENSG00000162692/ENSG00000108691/ENSG00000125538/ENSG00000115008/ENSG00000136244/ENSG00000151651/ENSG00000102524/ENSG00000168685/ENSG00000168961/ENSG00000090339/ENSG00000163874/ENSG00000026508/ENSG00000104312/ENSG00000144802/ENSG00000146072/ENSG00000105639/ENSG00000110944/ENSG00000134954/ENSG00000125347
GO:1901342	regulation of vasculature development	24	0.509971	1.78793	0.00427751	0.120414	0.109274	77	tags=58%, list=28%, signal=46%	ENSG00000169429/ENSG00000232810/ENSG00000006210/ENSG00000169245/ENSG00000125538/ENSG00000115008/ENSG00000136244/ENSG00000118503/ENSG00000112096/ENSG00000125730/ENSG00000163874/ENSG00000171236/ENSG00000064651/ENSG00000091879
GO:0034114	regulation of heterotypic cell-cell adhesion	4	0.822134	1.7089	0.00432704	0.121157	0.109948	20	tags=75%, list=7%, signal=71%	ENSG00000232810/ENSG00000136689/ENSG00000125538
GO:0032612	interleukin-1 production	13	0.629244	1.92786	0.00460389	0.125757	0.114122	65	tags=69%, list=23%, signal=56%	ENSG00000232810/ENSG00000006210/ENSG00000125538/ENSG00000136244/ENSG00000154451/ENSG00000118503/ENSG00000168961/ENSG00000173432/ENSG00000163874
GO:0042063	gliogenesis	15	0.585752	1.859	0.00470528	0.125757	0.114122	33	tags=47%, list=12%, signal=43%	ENSG00000232810/ENSG00000006210/ENSG00000108691/ENSG00000125538/ENSG00000135919/ENSG00000136244/ENSG00000137462
GO:0051345	positive regulation of hydrolase activity	15	0.585159	1.85712	0.00470528	0.125757	0.114122	13	tags=33%, list=5%, signal=34%	ENSG00000007908/ENSG00000232810/ENSG00000006210/ENSG00000108691/ENSG00000115009
GO:0010647	positive regulation of cell communication	67	0.406363	1.68637	0.00477446	0.125757	0.114122	72	tags=42%, list=26%, signal=41%	ENSG00000232810/ENSG00000006210/ENSG00000108691/ENSG00000115009/ENSG00000108342/ENSG00000125538/ENSG00000162892/ENSG00000135919/ENSG00000115008/ENSG00000123689/ENSG00000136244/ENSG00000137462/ENSG00000056558/ENSG00000151651/ENSG00000166523/ENSG00000118503/ENSG00000168685/ENSG00000075213/ENSG00000134070/ENSG00000168961/ENSG00000125730/ENSG00000090339/ENSG00000173432/ENSG00000163132/ENSG00000163874…
GO:0023056	positive regulation of signaling	67	0.406363	1.68637	0.00477446	0.125757	0.114122	72	tags=42%, list=26%, signal=41%	ENSG00000232810/ENSG00000006210/ENSG00000108691/ENSG00000115009/ENSG00000108342/ENSG00000125538/ENSG00000162892/ENSG00000135919/ENSG00000115008/ENSG00000123689/ENSG00000136244/ENSG00000137462/ENSG00000056558/ENSG00000151651/ENSG00000166523/ENSG00000118503/ENSG00000168685/ENSG00000075213/ENSG00000134070/ENSG00000168961/ENSG00000125730/ENSG00000090339/ENSG00000173432/ENSG00000163132/ENSG00000163874…
GO:0002790	peptide secretion	22	0.528725	1.82639	0.00478291	0.125757	0.114122	45	tags=45%, list=16%, signal=41%	ENSG00000232810/ENSG00000136689/ENSG00000125538/ENSG00000115008/ENSG00000136244/ENSG00000137462/ENSG00000028277/ENSG00000151651/ENSG00000102524/ENSG00000166523
GO:0032502	developmental process	142	0.368251	1.60724	0.00480595	0.125757	0.114122	78	tags=37%, list=28%, signal=54%	ENSG00000227507/ENSG00000169429/ENSG00000232810/ENSG00000006210/ENSG00000162692/ENSG00000108691/ENSG00000134363/ENSG00000204482/ENSG00000136689/ENSG00000163739/ENSG00000108342/ENSG00000169245/ENSG00000125538/ENSG00000135919/ENSG00000115008/ENSG00000136244/ENSG00000153993/ENSG00000211448/ENSG00000137462/ENSG00000028277/ENSG00000058085/ENSG00000185215/ENSG00000151651/ENSG00000102524/ENSG00000166523…
GO:0042742	defense response to bacterium	12	0.619262	1.82981	0.00480664	0.125757	0.114122	52	tags=58%, list=19%, signal=50%	ENSG00000232810/ENSG00000124875/ENSG00000115009/ENSG00000136244/ENSG00000137462/ENSG00000166523/ENSG00000226979
GO:2000401	regulation of lymphocyte migration	5	0.778474	1.76792	0.0048812	0.125757	0.114122	43	tags=80%, list=15%, signal=69%	ENSG00000108691/ENSG00000115009/ENSG00000169245/ENSG00000151651
GO:0001659	temperature homeostasis	9	0.661809	1.81128	0.00508371	0.125757	0.114122	32	tags=56%, list=12%, signal=51%	ENSG00000232810/ENSG00000125538/ENSG00000115008/ENSG00000123689/ENSG00000211448
GO:0048534	hematopoietic or lymphoid organ development	42	0.453228	1.76507	0.00509261	0.125757	0.114122	78	tags=50%, list=28%, signal=42%	ENSG00000227507/ENSG00000232810/ENSG00000162692/ENSG00000134363/ENSG00000108342/ENSG00000125538/ENSG00000115008/ENSG00000136244/ENSG00000137462/ENSG00000028277/ENSG00000151651/ENSG00000166523/ENSG00000168685/ENSG00000226979/ENSG00000168961/ENSG00000104856/ENSG00000163874/ENSG00000173334/ENSG00000122641/ENSG00000077150/ENSG00000168062
GO:0010893	positive regulation of steroid biosynthetic process	2	0.934783	1.53061	0.00510722	0.125757	0.114122	20	tags=100%, list=7%, signal=93%	ENSG00000232810/ENSG00000125538
GO:0030730	sequestering of triglyceride	2	0.934783	1.53061	0.00510722	0.125757	0.114122	20	tags=100%, list=7%, signal=93%	ENSG00000232810/ENSG00000125538
GO:0031620	regulation of fever generation	2	0.934783	1.53061	0.00510722	0.125757	0.114122	20	tags=100%, list=7%, signal=93%	ENSG00000232810/ENSG00000125538
GO:0031622	positive regulation of fever generation	2	0.934783	1.53061	0.00510722	0.125757	0.114122	20	tags=100%, list=7%, signal=93%	ENSG00000232810/ENSG00000125538
GO:0045940	positive regulation of steroid metabolic process	2	0.934783	1.53061	0.00510722	0.125757	0.114122	20	tags=100%, list=7%, signal=93%	ENSG00000232810/ENSG00000125538
GO:0046136	positive regulation of vitamin metabolic process	2	0.934783	1.53061	0.00510722	0.125757	0.114122	20	tags=100%, list=7%, signal=93%	ENSG00000232810/ENSG00000125538
GO:0050995	negative regulation of lipid catabolic process	2	0.934783	1.53061	0.00510722	0.125757	0.114122	20	tags=100%, list=7%, signal=93%	ENSG00000232810/ENSG00000125538
GO:0060352	cell adhesion molecule production	2	0.934783	1.53061	0.00510722	0.125757	0.114122	20	tags=100%, list=7%, signal=93%	ENSG00000169429/ENSG00000125538
GO:0060353	regulation of cell adhesion molecule production	2	0.934783	1.53061	0.00510722	0.125757	0.114122	20	tags=100%, list=7%, signal=93%	ENSG00000169429/ENSG00000125538
GO:0060557	positive regulation of vitamin D biosynthetic process	2	0.934783	1.53061	0.00510722	0.125757	0.114122	20	tags=100%, list=7%, signal=93%	ENSG00000232810/ENSG00000125538
GO:0060559	positive regulation of calcidiol 1-monooxygenase activity	2	0.934783	1.53061	0.00510722	0.125757	0.114122	20	tags=100%, list=7%, signal=93%	ENSG00000232810/ENSG00000125538
GO:1901550	regulation of endothelial cell development	2	0.934783	1.53061	0.00510722	0.125757	0.114122	20	tags=100%, list=7%, signal=93%	ENSG00000232810/ENSG00000125538
GO:1902932	positive regulation of alcohol biosynthetic process	2	0.934783	1.53061	0.00510722	0.125757	0.114122	20	tags=100%, list=7%, signal=93%	ENSG00000232810/ENSG00000125538
GO:1903140	regulation of establishment of endothelial barrier	2	0.934783	1.53061	0.00510722	0.125757	0.114122	20	tags=100%, list=7%, signal=93%	ENSG00000232810/ENSG00000125538
GO:0034767	positive regulation of ion transmembrane transport	8	0.695194	1.85041	0.00511576	0.125757	0.114122	39	tags=62%, list=14%, signal=55%	ENSG00000006210/ENSG00000108691/ENSG00000169245/ENSG00000169248/ENSG00000163131
GO:0032101	regulation of response to external stimulus	67	0.402372	1.66981	0.00522558	0.127856	0.116027	73	tags=40%, list=26%, signal=39%	ENSG00000007908/ENSG00000123610/ENSG00000169429/ENSG00000232810/ENSG00000006210/ENSG00000124875/ENSG00000108691/ENSG00000169245/ENSG00000125538/ENSG00000135919/ENSG00000136244/ENSG00000153993/ENSG00000137462/ENSG00000154451/ENSG00000151651/ENSG00000166523/ENSG00000118503/ENSG00000075213/ENSG00000226979/ENSG00000168961/ENSG00000125730/ENSG00000104856/ENSG00000173432/ENSG00000163874/ENSG00000173334…
GO:0032755	positive regulation of interleukin-6 production	11	0.637594	1.84616	0.00525276	0.127923	0.116088	34	tags=55%, list=12%, signal=50%	ENSG00000232810/ENSG00000125538/ENSG00000115008/ENSG00000136244/ENSG00000137462/ENSG00000028277
GO:0002440	production of molecular mediator of immune response	12	0.614966	1.81712	0.00533579	0.129344	0.117377	49	tags=58%, list=18%, signal=50%	ENSG00000232810/ENSG00000125538/ENSG00000136244/ENSG00000137462/ENSG00000028277/ENSG00000102524/ENSG00000168685
GO:0071356	cellular response to tumor necrosis factor	25	0.509655	1.78342	0.00553025	0.133375	0.121036	65	tags=48%, list=23%, signal=40%	ENSG00000227507/ENSG00000169429/ENSG00000232810/ENSG00000006210/ENSG00000108691/ENSG00000115009/ENSG00000056558/ENSG00000102524/ENSG00000118503/ENSG00000226979/ENSG00000090339/ENSG00000163874
GO:0051092	positive regulation of NF-kappaB transcription factor activity	15	0.582364	1.84825	0.00555306	0.133375	0.121036	74	tags=67%, list=27%, signal=52%	ENSG00000232810/ENSG00000006210/ENSG00000125538/ENSG00000137462/ENSG00000056558/ENSG00000151651/ENSG00000134070/ENSG00000168961/ENSG00000090339/ENSG00000077150
GO:0022603	regulation of anatomical structure morphogenesis	46	0.441828	1.75567	0.00562995	0.134598	0.122146	71	tags=46%, list=26%, signal=41%	ENSG00000169429/ENSG00000232810/ENSG00000006210/ENSG00000108691/ENSG00000204482/ENSG00000136689/ENSG00000169245/ENSG00000125538/ENSG00000115008/ENSG00000136244/ENSG00000153993/ENSG00000102524/ENSG00000118503/ENSG00000075213/ENSG00000125730/ENSG00000090339/ENSG00000163132/ENSG00000163874/ENSG00000171236/ENSG00000064651/ENSG00000138411
GO:0032637	interleukin-8 production	6	0.743593	1.78701	0.00570681	0.134598	0.122146	57	tags=83%, list=21%, signal=68%	ENSG00000232810/ENSG00000125538/ENSG00000136244/ENSG00000137462/ENSG00000168961
GO:0032677	regulation of interleukin-8 production	6	0.743593	1.78701	0.00570681	0.134598	0.122146	57	tags=83%, list=21%, signal=68%	ENSG00000232810/ENSG00000125538/ENSG00000136244/ENSG00000137462/ENSG00000168961
GO:0032757	positive regulation of interleukin-8 production	6	0.743593	1.78701	0.00570681	0.134598	0.122146	57	tags=83%, list=21%, signal=68%	ENSG00000232810/ENSG00000125538/ENSG00000136244/ENSG00000137462/ENSG00000168961
GO:0007154	cell communication	159	0.368566	1.60408	0.00584324	0.137198	0.124505	75	tags=34%, list=27%, signal=58%	ENSG00000007908/ENSG00000227507/ENSG00000123610/ENSG00000169429/ENSG00000232810/ENSG00000006210/ENSG00000124875/ENSG00000162692/ENSG00000108691/ENSG00000134363/ENSG00000115009/ENSG00000136689/ENSG00000163739/ENSG00000108342/ENSG00000169245/ENSG00000163735/ENSG00000125538/ENSG00000162892/ENSG00000135919/ENSG00000169248/ENSG00000115008/ENSG00000123689/ENSG00000136244/ENSG00000153993/ENSG00000137462…
GO:0043523	regulation of neuron apoptotic process	7	0.721616	1.83769	0.00588412	0.137541	0.124816	50	tags=71%, list=18%, signal=60%	ENSG00000232810/ENSG00000006210/ENSG00000108691/ENSG00000151651/ENSG00000112096
GO:0043112	receptor metabolic process	7	0.720366	1.83451	0.00607547	0.141383	0.128302	5	tags=43%, list=2%, signal=43%	ENSG00000007908/ENSG00000169429/ENSG00000232810
GO:0030073	insulin secretion	7	0.71922	1.83159	0.00617114	0.142065	0.128921	29	tags=57%, list=10%, signal=53%	ENSG00000232810/ENSG00000136689/ENSG00000125538/ENSG00000136244
GO:0044782	cilium organization	3	-0.865455	-1.79914	0.00620734	0.142065	0.128921	41	tags=100%, list=15%, signal=86%	ENSG00000156313/ENSG00000173210
GO:0060271	cilium assembly	3	-0.865455	-1.79914	0.00620734	0.142065	0.128921	41	tags=100%, list=15%, signal=86%	ENSG00000156313/ENSG00000173210
GO:2001233	regulation of apoptotic signaling pathway	21	0.517941	1.76984	0.00623654	0.142065	0.128921	72	tags=57%, list=26%, signal=46%	ENSG00000232810/ENSG00000006210/ENSG00000125538/ENSG00000115008/ENSG00000123689/ENSG00000056558/ENSG00000118503/ENSG00000112096/ENSG00000168961/ENSG00000090339/ENSG00000163132/ENSG00000122641
GO:0043270	positive regulation of ion transport	11	0.631871	1.82959	0.00624044	0.142065	0.128921	39	tags=55%, list=14%, signal=49%	ENSG00000006210/ENSG00000108691/ENSG00000169245/ENSG00000125538/ENSG00000169248/ENSG00000163131
GO:0034113	heterotypic cell-cell adhesion	7	0.716336	1.82425	0.00645817	0.146385	0.132842	20	tags=57%, list=7%, signal=54%	ENSG00000232810/ENSG00000162692/ENSG00000136689/ENSG00000125538
GO:0048856	anatomical structure development	134	0.373104	1.61675	0.00651967	0.147142	0.133529	78	tags=37%, list=28%, signal=52%	ENSG00000227507/ENSG00000169429/ENSG00000232810/ENSG00000006210/ENSG00000162692/ENSG00000108691/ENSG00000134363/ENSG00000204482/ENSG00000136689/ENSG00000163739/ENSG00000108342/ENSG00000169245/ENSG00000125538/ENSG00000135919/ENSG00000115008/ENSG00000136244/ENSG00000153993/ENSG00000137462/ENSG00000028277/ENSG00000058085/ENSG00000185215/ENSG00000151651/ENSG00000102524/ENSG00000166523/ENSG00000196878…
GO:0050764	regulation of phagocytosis	9	0.654759	1.79198	0.00657614	0.147399	0.133762	58	tags=67%, list=21%, signal=55%	ENSG00000232810/ENSG00000108691/ENSG00000125538/ENSG00000137462/ENSG00000163661/ENSG00000125730
GO:0061756	leukocyte adhesion to vascular endothelial cell	6	0.739464	1.77709	0.00660002	0.147399	0.133762	29	tags=67%, list=10%, signal=61%	ENSG00000007908/ENSG00000232810/ENSG00000162692/ENSG00000136244
GO:0051047	positive regulation of secretion	15	0.577751	1.83361	0.00673995	0.147399	0.133762	72	tags=67%, list=26%, signal=52%	ENSG00000232810/ENSG00000125538/ENSG00000115008/ENSG00000136244/ENSG00000137462/ENSG00000151651/ENSG00000166523/ENSG00000173432/ENSG00000064651/ENSG00000122641
GO:1903532	positive regulation of secretion by cell	15	0.577751	1.83361	0.00673995	0.147399	0.133762	72	tags=67%, list=26%, signal=52%	ENSG00000232810/ENSG00000125538/ENSG00000115008/ENSG00000136244/ENSG00000137462/ENSG00000151651/ENSG00000166523/ENSG00000173432/ENSG00000064651/ENSG00000122641
GO:0002922	positive regulation of humoral immune response	4	0.80292	1.66896	0.00675222	0.147399	0.133762	58	tags=100%, list=21%, signal=80%	ENSG00000232810/ENSG00000125538/ENSG00000226979/ENSG00000125730
GO:0010574	regulation of vascular endothelial growth factor production	4	0.80292	1.66896	0.00675222	0.147399	0.133762	58	tags=100%, list=21%, signal=80%	ENSG00000125538/ENSG00000115008/ENSG00000136244/ENSG00000125730
GO:0010575	positive regulation of vascular endothelial growth factor production	4	0.80292	1.66896	0.00675222	0.147399	0.133762	58	tags=100%, list=21%, signal=80%	ENSG00000125538/ENSG00000115008/ENSG00000136244/ENSG00000125730
GO:0002521	leukocyte differentiation	31	0.489072	1.78502	0.00675626	0.147399	0.133762	113	tags=74%, list=41%, signal=50%	ENSG00000232810/ENSG00000162692/ENSG00000108342/ENSG00000125538/ENSG00000115008/ENSG00000136244/ENSG00000137462/ENSG00000028277/ENSG00000151651/ENSG00000166523/ENSG00000168685/ENSG00000168961/ENSG00000104856/ENSG00000163874/ENSG00000173334/ENSG00000122641/ENSG00000168062/ENSG00000184371/ENSG00000048052/ENSG00000104312/ENSG00000144802/ENSG00000105639/ENSG00000110944
GO:0007275	multicellular organism development	129	0.367697	1.58775	0.00682455	0.148271	0.134553	84	tags=40%, list=30%, signal=51%	ENSG00000227507/ENSG00000169429/ENSG00000232810/ENSG00000006210/ENSG00000162692/ENSG00000108691/ENSG00000134363/ENSG00000204482/ENSG00000136689/ENSG00000163739/ENSG00000108342/ENSG00000169245/ENSG00000125538/ENSG00000135919/ENSG00000115008/ENSG00000136244/ENSG00000153993/ENSG00000137462/ENSG00000028277/ENSG00000058085/ENSG00000185215/ENSG00000151651/ENSG00000166523/ENSG00000196878/ENSG00000118503…
GO:0002460	adaptive immune response based on somatic recombination of immune receptors built from immunoglobulin superfamily domains	24	0.497647	1.74473	0.00691592	0.149635	0.135791	116	tags=79%, list=42%, signal=50%	ENSG00000232810/ENSG00000125538/ENSG00000136244/ENSG00000028277/ENSG00000102524/ENSG00000118503/ENSG00000168685/ENSG00000226979/ENSG00000125730/ENSG00000104856/ENSG00000090339/ENSG00000163874/ENSG00000077150/ENSG00000104312/ENSG00000144802/ENSG00000182326/ENSG00000105639/ENSG00000110944/ENSG00000204642
GO:0002703	regulation of leukocyte mediated immunity	16	0.553087	1.7882	0.00695236	0.149678	0.13583	60	tags=56%, list=22%, signal=47%	ENSG00000232810/ENSG00000124875/ENSG00000125538/ENSG00000136244/ENSG00000168685/ENSG00000226979/ENSG00000168961/ENSG00000125730/ENSG00000090339
GO:0010720	positive regulation of cell development	15	0.576734	1.83038	0.00699428	0.149678	0.13583	67	tags=60%, list=24%, signal=48%	ENSG00000232810/ENSG00000006210/ENSG00000125538/ENSG00000135919/ENSG00000136244/ENSG00000137462/ENSG00000075213/ENSG00000226979/ENSG00000173334
GO:0038034	signal transduction in absence of ligand	7	0.712744	1.8151	0.00703221	0.149678	0.13583	27	tags=57%, list=10%, signal=53%	ENSG00000232810/ENSG00000006210/ENSG00000125538/ENSG00000115008
GO:0097192	extrinsic apoptotic signaling pathway in absence of ligand	7	0.712744	1.8151	0.00703221	0.149678	0.13583	27	tags=57%, list=10%, signal=53%	ENSG00000232810/ENSG00000006210/ENSG00000125538/ENSG00000115008
GO:0045785	positive regulation of cell adhesion	33	0.464289	1.71911	0.00707611	0.150002	0.136124	61	tags=42%, list=22%, signal=38%	ENSG00000007908/ENSG00000232810/ENSG00000006210/ENSG00000162692/ENSG00000108691/ENSG00000125538/ENSG00000115008/ENSG00000136244/ENSG00000151651/ENSG00000102524/ENSG00000168685/ENSG00000168961/ENSG00000090339/ENSG00000173432
GO:0009605	response to external stimulus	131	0.376652	1.62584	0.00725751	0.151644	0.137614	61	tags=31%, list=22%, signal=45%	ENSG00000007908/ENSG00000123610/ENSG00000169429/ENSG00000232810/ENSG00000006210/ENSG00000124875/ENSG00000162692/ENSG00000108691/ENSG00000115009/ENSG00000163739/ENSG00000108342/ENSG00000169245/ENSG00000163735/ENSG00000125538/ENSG00000162892/ENSG00000135919/ENSG00000166920/ENSG00000169248/ENSG00000115008/ENSG00000136244/ENSG00000153993/ENSG00000137462/ENSG00000028277/ENSG00000058085/ENSG00000163734…
GO:0050896	response to stimulus	204	0.383268	1.63539	0.00733194	0.151644	0.137614	108	tags=44%, list=39%, signal=101%	ENSG00000007908/ENSG00000227507/ENSG00000123610/ENSG00000169429/ENSG00000232810/ENSG00000006210/ENSG00000124875/ENSG00000162692/ENSG00000108691/ENSG00000134363/ENSG00000204482/ENSG00000115009/ENSG00000136689/ENSG00000163739/ENSG00000108342/ENSG00000169245/ENSG00000163735/ENSG00000125538/ENSG00000162892/ENSG00000135919/ENSG00000166920/ENSG00000169248/ENSG00000115008/ENSG00000123689/ENSG00000136244…
GO:0007202	activation of phospholipase C activity	1	1	1.3272	0.00735629	0.151644	0.137614	1	tags=100%, list=0%, signal=100%	ENSG00000007908
GO:0010863	positive regulation of phospholipase C activity	1	1	1.3272	0.00735629	0.151644	0.137614	1	tags=100%, list=0%, signal=100%	ENSG00000007908
GO:1900274	regulation of phospholipase C activity	1	1	1.3272	0.00735629	0.151644	0.137614	1	tags=100%, list=0%, signal=100%	ENSG00000007908
GO:1903236	regulation of leukocyte tethering or rolling	1	1	1.3272	0.00735629	0.151644	0.137614	1	tags=100%, list=0%, signal=100%	ENSG00000007908
GO:1903238	positive regulation of leukocyte tethering or rolling	1	1	1.3272	0.00735629	0.151644	0.137614	1	tags=100%, list=0%, signal=100%	ENSG00000007908
GO:0048731	system development	125	0.356328	1.53638	0.00757039	0.155445	0.141064	84	tags=39%, list=30%, signal=50%	ENSG00000227507/ENSG00000169429/ENSG00000232810/ENSG00000006210/ENSG00000162692/ENSG00000108691/ENSG00000134363/ENSG00000204482/ENSG00000163739/ENSG00000108342/ENSG00000169245/ENSG00000125538/ENSG00000135919/ENSG00000115008/ENSG00000136244/ENSG00000153993/ENSG00000137462/ENSG00000028277/ENSG00000058085/ENSG00000185215/ENSG00000151651/ENSG00000166523/ENSG00000196878/ENSG00000118503/ENSG00000168685…
GO:0015881	creatine transmembrane transport	1	-1	-1.34836	0.00765593	0.155551	0.14116	2	tags=100%, list=1%, signal=100%
GO:0072337	modified amino acid transport	1	-1	-1.34836	0.00765593	0.155551	0.14116	2	tags=100%, list=1%, signal=100%
GO:0021782	glial cell development	7	0.708113	1.80331	0.00770194	0.155551	0.14116	33	tags=57%, list=12%, signal=52%	ENSG00000232810/ENSG00000125538/ENSG00000136244/ENSG00000137462
GO:0031649	heat generation	4	0.799699	1.66227	0.00772452	0.155551	0.14116	27	tags=75%, list=10%, signal=69%	ENSG00000232810/ENSG00000125538/ENSG00000115008
GO:0048167	regulation of synaptic plasticity	2	0.923913	1.51281	0.00774593	0.155551	0.14116	23	tags=100%, list=8%, signal=92%	ENSG00000006210/ENSG00000135919
GO:1900017	positive regulation of cytokine production involved in inflammatory response	3	0.861818	1.63015	0.00775378	0.155551	0.14116	41	tags=100%, list=15%, signal=86%	ENSG00000232810/ENSG00000136244/ENSG00000154451
GO:0051094	positive regulation of developmental process	53	0.420699	1.69048	0.00830312	0.165936	0.150584	72	tags=43%, list=26%, signal=40%	ENSG00000169429/ENSG00000232810/ENSG00000006210/ENSG00000134363/ENSG00000108342/ENSG00000125538/ENSG00000135919/ENSG00000115008/ENSG00000136244/ENSG00000137462/ENSG00000151651/ENSG00000102524/ENSG00000118503/ENSG00000168685/ENSG00000112096/ENSG00000075213/ENSG00000226979/ENSG00000168961/ENSG00000125730/ENSG00000163874/ENSG00000173334/ENSG00000171236/ENSG00000122641
GO:0010522	regulation of calcium ion transport into cytosol	5	0.758543	1.72266	0.00866864	0.167414	0.151925	26	tags=60%, list=9%, signal=55%	ENSG00000006210/ENSG00000169245/ENSG00000169248
GO:0051208	sequestering of calcium ion	5	0.758543	1.72266	0.00866864	0.167414	0.151925	26	tags=60%, list=9%, signal=55%	ENSG00000006210/ENSG00000169245/ENSG00000169248
GO:0051209	release of sequestered calcium ion into cytosol	5	0.758543	1.72266	0.00866864	0.167414	0.151925	26	tags=60%, list=9%, signal=55%	ENSG00000006210/ENSG00000169245/ENSG00000169248
GO:0051282	regulation of sequestering of calcium ion	5	0.758543	1.72266	0.00866864	0.167414	0.151925	26	tags=60%, list=9%, signal=55%	ENSG00000006210/ENSG00000169245/ENSG00000169248
GO:0051283	negative regulation of sequestering of calcium ion	5	0.758543	1.72266	0.00866864	0.167414	0.151925	26	tags=60%, list=9%, signal=55%	ENSG00000006210/ENSG00000169245/ENSG00000169248
GO:0060401	cytosolic calcium ion transport	5	0.758543	1.72266	0.00866864	0.167414	0.151925	26	tags=60%, list=9%, signal=55%	ENSG00000006210/ENSG00000169245/ENSG00000169248
GO:0060402	calcium ion transport into cytosol	5	0.758543	1.72266	0.00866864	0.167414	0.151925	26	tags=60%, list=9%, signal=55%	ENSG00000006210/ENSG00000169245/ENSG00000169248
GO:0097553	calcium ion transmembrane import into cytosol	5	0.758543	1.72266	0.00866864	0.167414	0.151925	26	tags=60%, list=9%, signal=55%	ENSG00000006210/ENSG00000169245/ENSG00000169248
GO:0045429	positive regulation of nitric oxide biosynthetic process	4	0.79562	1.65379	0.00869682	0.167414	0.151925	60	tags=100%, list=22%, signal=80%	ENSG00000232810/ENSG00000125538/ENSG00000163661/ENSG00000090339
GO:1903428	positive regulation of reactive oxygen species biosynthetic process	4	0.79562	1.65379	0.00869682	0.167414	0.151925	60	tags=100%, list=22%, signal=80%	ENSG00000232810/ENSG00000125538/ENSG00000163661/ENSG00000090339
GO:0097191	extrinsic apoptotic signaling pathway	15	0.565398	1.7944	0.00894585	0.171577	0.155703	83	tags=67%, list=30%, signal=49%	ENSG00000232810/ENSG00000006210/ENSG00000125538/ENSG00000115008/ENSG00000123689/ENSG00000056558/ENSG00000118503/ENSG00000090339/ENSG00000122641/ENSG00000121858
GO:0050870	positive regulation of T cell activation	18	0.525194	1.74609	0.00907461	0.172276	0.156337	57	tags=50%, list=21%, signal=42%	ENSG00000162692/ENSG00000108691/ENSG00000125538/ENSG00000115008/ENSG00000136244/ENSG00000151651/ENSG00000102524/ENSG00000168685/ENSG00000168961
GO:0065008	regulation of biological quality	94	0.362339	1.54281	0.00909678	0.172276	0.156337	66	tags=34%, list=24%, signal=39%	ENSG00000232810/ENSG00000006210/ENSG00000124875/ENSG00000108691/ENSG00000204482/ENSG00000136689/ENSG00000108342/ENSG00000169245/ENSG00000125538/ENSG00000135919/ENSG00000169248/ENSG00000115008/ENSG00000123689/ENSG00000136244/ENSG00000153993/ENSG00000105825/ENSG00000211448/ENSG00000137462/ENSG00000151651/ENSG00000102524/ENSG00000101670/ENSG00000118503/ENSG00000168685/ENSG00000112096/ENSG00000075213…
GO:0009653	anatomical structure morphogenesis	91	0.374982	1.59554	0.00910593	0.172276	0.156337	77	tags=40%, list=28%, signal=43%	ENSG00000169429/ENSG00000232810/ENSG00000006210/ENSG00000108691/ENSG00000134363/ENSG00000204482/ENSG00000136689/ENSG00000169245/ENSG00000125538/ENSG00000135919/ENSG00000115008/ENSG00000136244/ENSG00000153993/ENSG00000137462/ENSG00000058085/ENSG00000185215/ENSG00000151651/ENSG00000102524/ENSG00000196878/ENSG00000118503/ENSG00000168685/ENSG00000075213/ENSG00000125730/ENSG00000090339/ENSG00000163132…
GO:0042634	regulation of hair cycle	3	0.856913	1.62088	0.00913221	0.172276	0.156337	10	tags=67%, list=4%, signal=65%	ENSG00000232810/ENSG00000134363
GO:0032652	regulation of interleukin-1 production	10	0.623863	1.76137	0.00914679	0.172276	0.156337	65	tags=70%, list=23%, signal=56%	ENSG00000232810/ENSG00000006210/ENSG00000136244/ENSG00000118503/ENSG00000168961/ENSG00000173432/ENSG00000163874
GO:0048513	animal organ development	93	0.372058	1.58668	0.00922858	0.173193	0.15717	102	tags=49%, list=37%, signal=47%	ENSG00000227507/ENSG00000169429/ENSG00000232810/ENSG00000162692/ENSG00000108691/ENSG00000134363/ENSG00000108342/ENSG00000169245/ENSG00000125538/ENSG00000135919/ENSG00000115008/ENSG00000136244/ENSG00000153993/ENSG00000137462/ENSG00000028277/ENSG00000058085/ENSG00000151651/ENSG00000166523/ENSG00000196878/ENSG00000118503/ENSG00000168685/ENSG00000075213/ENSG00000226979/ENSG00000163661/ENSG00000168961…
GO:0002822	regulation of adaptive immune response based on somatic recombination of immune receptors built from immunoglobulin superfamily domains	16	0.542314	1.75337	0.00928777	0.173681	0.157613	116	tags=88%, list=42%, signal=54%	ENSG00000232810/ENSG00000125538/ENSG00000136244/ENSG00000102524/ENSG00000118503/ENSG00000168685/ENSG00000226979/ENSG00000125730/ENSG00000163874/ENSG00000104312/ENSG00000144802/ENSG00000105639/ENSG00000110944/ENSG00000204642
GO:0045682	regulation of epidermis development	3	0.855219	1.61767	0.00936195	0.174137	0.158026	10	tags=67%, list=4%, signal=65%	ENSG00000232810/ENSG00000134363
GO:0016043	cellular component organization	105	0.363017	1.55796	0.00937864	0.174137	0.158026	74	tags=36%, list=27%, signal=43%	ENSG00000007908/ENSG00000232810/ENSG00000006210/ENSG00000162692/ENSG00000108691/ENSG00000204482/ENSG00000163739/ENSG00000108342/ENSG00000169245/ENSG00000125538/ENSG00000159261/ENSG00000135919/ENSG00000115008/ENSG00000136244/ENSG00000153993/ENSG00000137462/ENSG00000058085/ENSG00000056558/ENSG00000163131/ENSG00000154451/ENSG00000151651/ENSG00000101670/ENSG00000196878/ENSG00000118503/ENSG00000168685…
GO:0051961	negative regulation of nervous system development	13	0.595022	1.82301	0.00959916	0.177601	0.16117	51	tags=54%, list=18%, signal=46%	ENSG00000232810/ENSG00000006210/ENSG00000125538/ENSG00000136244/ENSG00000153993/ENSG00000137462/ENSG00000075213
GO:2000026	regulation of multicellular organismal development	70	0.388066	1.62496	0.00970796	0.178412	0.161906	72	tags=40%, list=26%, signal=40%	ENSG00000169429/ENSG00000232810/ENSG00000006210/ENSG00000134363/ENSG00000136689/ENSG00000108342/ENSG00000169245/ENSG00000125538/ENSG00000135919/ENSG00000115008/ENSG00000136244/ENSG00000153993/ENSG00000137462/ENSG00000151651/ENSG00000118503/ENSG00000168685/ENSG00000112096/ENSG00000075213/ENSG00000226979/ENSG00000168961/ENSG00000125730/ENSG00000163132/ENSG00000163874/ENSG00000173334/ENSG00000171236…
GO:0014009	glial cell proliferation	7	0.697511	1.77631	0.00971112	0.178412	0.161906	52	tags=71%, list=19%, signal=60%	ENSG00000232810/ENSG00000006210/ENSG00000125538/ENSG00000136244/ENSG00000226979
GO:0042592	homeostatic process	52	0.412372	1.65681	0.00982659	0.179133	0.16256	61	tags=38%, list=22%, signal=37%	ENSG00000232810/ENSG00000006210/ENSG00000124875/ENSG00000108691/ENSG00000169245/ENSG00000125538/ENSG00000169248/ENSG00000115008/ENSG00000123689/ENSG00000136244/ENSG00000211448/ENSG00000151651/ENSG00000102524/ENSG00000101670/ENSG00000118503/ENSG00000168685/ENSG00000112096/ENSG00000168961/ENSG00000090339/ENSG00000173432
GO:0051249	regulation of lymphocyte activation	26	0.480772	1.70342	0.00985107	0.179133	0.16256	120	tags=77%, list=43%, signal=48%	ENSG00000162692/ENSG00000108691/ENSG00000204482/ENSG00000125538/ENSG00000115008/ENSG00000136244/ENSG00000151651/ENSG00000102524/ENSG00000118503/ENSG00000168685/ENSG00000168961/ENSG00000163874/ENSG00000122641/ENSG00000104312/ENSG00000144802/ENSG00000146072/ENSG00000105639/ENSG00000110944/ENSG00000204642/ENSG00000125347
GO:0002250	adaptive immune response	29	0.488617	1.76969	0.00985301	0.179133	0.16256	120	tags=79%, list=43%, signal=50%	ENSG00000232810/ENSG00000125538/ENSG00000136244/ENSG00000028277/ENSG00000163131/ENSG00000102524/ENSG00000118503/ENSG00000168685/ENSG00000226979/ENSG00000125730/ENSG00000104856/ENSG00000090339/ENSG00000163874/ENSG00000077150/ENSG00000104312/ENSG00000144802/ENSG00000182326/ENSG00000078081/ENSG00000146072/ENSG00000105639/ENSG00000110944/ENSG00000204642/ENSG00000125347
GO:0002523	leukocyte migration involved in inflammatory response	3	0.854545	1.6164	0.010166	0.18355	0.166568	43	tags=100%, list=15%, signal=85%	ENSG00000007908/ENSG00000006210/ENSG00000151651
GO:0051044	positive regulation of membrane protein ectodomain proteolysis	3	0.854545	1.6164	0.010166	0.18355	0.166568	43	tags=100%, list=15%, signal=85%	ENSG00000232810/ENSG00000125538/ENSG00000151651
GO:0050789	regulation of biological process	218	0.379833	1.58667	0.0102893	0.183795	0.166791	108	tags=43%, list=39%, signal=122%	ENSG00000007908/ENSG00000227507/ENSG00000123610/ENSG00000169429/ENSG00000232810/ENSG00000006210/ENSG00000124875/ENSG00000162692/ENSG00000108691/ENSG00000134363/ENSG00000204482/ENSG00000115009/ENSG00000136689/ENSG00000163739/ENSG00000108342/ENSG00000169245/ENSG00000163735/ENSG00000125538/ENSG00000162892/ENSG00000135919/ENSG00000169248/ENSG00000115008/ENSG00000123689/ENSG00000136244/ENSG00000153993…
GO:0065007	biological regulation	218	0.379833	1.58667	0.0102893	0.183795	0.166791	108	tags=43%, list=39%, signal=122%	ENSG00000007908/ENSG00000227507/ENSG00000123610/ENSG00000169429/ENSG00000232810/ENSG00000006210/ENSG00000124875/ENSG00000162692/ENSG00000108691/ENSG00000134363/ENSG00000204482/ENSG00000115009/ENSG00000136689/ENSG00000163739/ENSG00000108342/ENSG00000169245/ENSG00000163735/ENSG00000125538/ENSG00000162892/ENSG00000135919/ENSG00000169248/ENSG00000115008/ENSG00000123689/ENSG00000136244/ENSG00000153993…
GO:0060251	regulation of glial cell proliferation	5	0.751318	1.70625	0.0103297	0.183795	0.166791	52	tags=80%, list=19%, signal=66%	ENSG00000232810/ENSG00000125538/ENSG00000136244/ENSG00000226979
GO:0060252	positive regulation of glial cell proliferation	5	0.751318	1.70625	0.0103297	0.183795	0.166791	52	tags=80%, list=19%, signal=66%	ENSG00000232810/ENSG00000125538/ENSG00000136244/ENSG00000226979
GO:0007189	adenylate cyclase-activating G protein-coupled receptor signaling pathway	2	0.913043	1.49501	0.0103908	0.183795	0.166791	26	tags=100%, list=9%, signal=91%	ENSG00000169245/ENSG00000169248
GO:0019933	cAMP-mediated signaling	2	0.913043	1.49501	0.0103908	0.183795	0.166791	26	tags=100%, list=9%, signal=91%	ENSG00000169245/ENSG00000169248
GO:0007252	I-kappaB phosphorylation	4	0.790525	1.6432	0.0104254	0.183795	0.166791	33	tags=75%, list=12%, signal=67%	ENSG00000232810/ENSG00000006210/ENSG00000137462
GO:0001934	positive regulation of protein phosphorylation	41	0.438116	1.70497	0.0105325	0.185061	0.16794	72	tags=46%, list=26%, signal=40%	ENSG00000232810/ENSG00000006210/ENSG00000108691/ENSG00000115009/ENSG00000108342/ENSG00000125538/ENSG00000162892/ENSG00000136244/ENSG00000056558/ENSG00000151651/ENSG00000075213/ENSG00000134070/ENSG00000168961/ENSG00000125730/ENSG00000090339/ENSG00000173432/ENSG00000163874/ENSG00000138675/ENSG00000122641
GO:0002449	lymphocyte mediated immunity	16	0.538708	1.74171	0.0106265	0.186088	0.168872	60	tags=56%, list=22%, signal=47%	ENSG00000232810/ENSG00000125538/ENSG00000136244/ENSG00000028277/ENSG00000168685/ENSG00000226979/ENSG00000168961/ENSG00000125730/ENSG00000090339
GO:0002446	neutrophil mediated immunity	21	0.500583	1.71053	0.0109173	0.190544	0.172915	68	tags=52%, list=24%, signal=43%	ENSG00000123610/ENSG00000124875/ENSG00000163739/ENSG00000136244/ENSG00000137462/ENSG00000163131/ENSG00000151651/ENSG00000163661/ENSG00000125730/ENSG00000096696/ENSG00000171236
GO:0051049	regulation of transport	58	0.400613	1.63373	0.011141	0.190678	0.173037	72	tags=41%, list=26%, signal=39%	ENSG00000007908/ENSG00000232810/ENSG00000006210/ENSG00000108691/ENSG00000169245/ENSG00000125538/ENSG00000135919/ENSG00000169248/ENSG00000115008/ENSG00000136244/ENSG00000137462/ENSG00000163131/ENSG00000151651/ENSG00000166523/ENSG00000101670/ENSG00000163661/ENSG00000168961/ENSG00000125730/ENSG00000090339/ENSG00000173432/ENSG00000163874/ENSG00000064651/ENSG00000138411/ENSG00000122641
GO:0070086	ubiquitin-dependent endocytosis	1	-0.99639	-1.34349	0.0111427	0.190678	0.173037	3	tags=100%, list=1%, signal=99%
GO:0045765	regulation of angiogenesis	23	0.495804	1.72953	0.0111684	0.190678	0.173037	77	tags=57%, list=28%, signal=45%	ENSG00000169429/ENSG00000232810/ENSG00000006210/ENSG00000169245/ENSG00000125538/ENSG00000115008/ENSG00000136244/ENSG00000118503/ENSG00000125730/ENSG00000163874/ENSG00000171236/ENSG00000064651/ENSG00000091879
GO:0048565	digestive tract development	4	0.784637	1.63096	0.0111827	0.190678	0.173037	5	tags=50%, list=2%, signal=50%	ENSG00000169429/ENSG00000232810
GO:0055123	digestive system development	4	0.784637	1.63096	0.0111827	0.190678	0.173037	5	tags=50%, list=2%, signal=50%	ENSG00000169429/ENSG00000232810
GO:0048245	eosinophil chemotaxis	3	0.85008	1.60795	0.0111999	0.190678	0.173037	9	tags=67%, list=3%, signal=65%	ENSG00000006210/ENSG00000108691
GO:0035556	intracellular signal transduction	84	0.371804	1.56736	0.0112018	0.190678	0.173037	75	tags=38%, list=27%, signal=40%	ENSG00000007908/ENSG00000169429/ENSG00000232810/ENSG00000006210/ENSG00000162692/ENSG00000108691/ENSG00000115009/ENSG00000163739/ENSG00000108342/ENSG00000169245/ENSG00000125538/ENSG00000135919/ENSG00000169248/ENSG00000136244/ENSG00000137462/ENSG00000056558/ENSG00000151651/ENSG00000118503/ENSG00000112096/ENSG00000075213/ENSG00000134070/ENSG00000168961/ENSG00000104856/ENSG00000090339/ENSG00000173432…
GO:2001237	negative regulation of extrinsic apoptotic signaling pathway	8	0.670141	1.78373	0.0112253	0.190678	0.173037	60	tags=75%, list=22%, signal=61%	ENSG00000232810/ENSG00000006210/ENSG00000125538/ENSG00000115008/ENSG00000118503/ENSG00000090339
GO:0032722	positive regulation of chemokine production	6	0.722753	1.73693	0.0112705	0.190678	0.173037	57	tags=83%, list=21%, signal=68%	ENSG00000232810/ENSG00000125538/ENSG00000136244/ENSG00000137462/ENSG00000168961
GO:0033080	immature T cell proliferation in thymus	2	0.90942	1.48908	0.0113984	0.190678	0.173037	27	tags=100%, list=10%, signal=91%	ENSG00000125538/ENSG00000115008
GO:0033084	regulation of immature T cell proliferation in thymus	2	0.90942	1.48908	0.0113984	0.190678	0.173037	27	tags=100%, list=10%, signal=91%	ENSG00000125538/ENSG00000115008
GO:0033092	positive regulation of immature T cell proliferation in thymus	2	0.90942	1.48908	0.0113984	0.190678	0.173037	27	tags=100%, list=10%, signal=91%	ENSG00000125538/ENSG00000115008
GO:0045840	positive regulation of mitotic nuclear division	2	0.90942	1.48908	0.0113984	0.190678	0.173037	27	tags=100%, list=10%, signal=91%	ENSG00000125538/ENSG00000115008
GO:0009967	positive regulation of signal transduction	61	0.388616	1.59252	0.0118748	0.196931	0.178711	72	tags=41%, list=26%, signal=39%	ENSG00000232810/ENSG00000006210/ENSG00000108691/ENSG00000115009/ENSG00000108342/ENSG00000125538/ENSG00000162892/ENSG00000123689/ENSG00000136244/ENSG00000137462/ENSG00000056558/ENSG00000151651/ENSG00000118503/ENSG00000168685/ENSG00000075213/ENSG00000134070/ENSG00000168961/ENSG00000125730/ENSG00000090339/ENSG00000173432/ENSG00000163132/ENSG00000163874/ENSG00000171236/ENSG00000138675/ENSG00000122641
GO:0030217	T cell differentiation	16	0.534665	1.72863	0.0119653	0.196931	0.178711	120	tags=88%, list=43%, signal=53%	ENSG00000125538/ENSG00000115008/ENSG00000136244/ENSG00000151651/ENSG00000166523/ENSG00000168685/ENSG00000168961/ENSG00000104856/ENSG00000163874/ENSG00000104312/ENSG00000144802/ENSG00000105639/ENSG00000110944/ENSG00000125347
GO:0002444	myeloid leukocyte mediated immunity	24	0.481416	1.68782	0.0119718	0.196931	0.178711	68	tags=50%, list=24%, signal=41%	ENSG00000123610/ENSG00000124875/ENSG00000163739/ENSG00000136244/ENSG00000137462/ENSG00000163131/ENSG00000151651/ENSG00000163661/ENSG00000168961/ENSG00000125730/ENSG00000096696/ENSG00000171236
GO:0007346	regulation of mitotic cell cycle	8	0.667791	1.77747	0.01198	0.196931	0.178711	27	tags=50%, list=10%, signal=46%	ENSG00000232810/ENSG00000108691/ENSG00000125538/ENSG00000115008
GO:0014002	astrocyte development	5	0.744026	1.68969	0.0119979	0.196931	0.178711	29	tags=60%, list=10%, signal=55%	ENSG00000232810/ENSG00000125538/ENSG00000136244
GO:0043524	negative regulation of neuron apoptotic process	5	0.74584	1.69381	0.0119979	0.196931	0.178711	50	tags=80%, list=18%, signal=67%	ENSG00000006210/ENSG00000108691/ENSG00000151651/ENSG00000112096
GO:0032501	multicellular organismal process	169	0.349715	1.52304	0.0120434	0.19706	0.178829	74	tags=33%, list=27%, signal=61%	ENSG00000227507/ENSG00000123610/ENSG00000169429/ENSG00000232810/ENSG00000006210/ENSG00000124875/ENSG00000162692/ENSG00000108691/ENSG00000134363/ENSG00000204482/ENSG00000136689/ENSG00000163739/ENSG00000108342/ENSG00000169245/ENSG00000125538/ENSG00000135919/ENSG00000115008/ENSG00000123689/ENSG00000136244/ENSG00000153993/ENSG00000105825/ENSG00000211448/ENSG00000137462/ENSG00000028277/ENSG00000058085…
GO:0032715	negative regulation of interleukin-6 production	4	0.777372	1.61586	0.0122683	0.198876	0.180476	65	tags=100%, list=23%, signal=78%	ENSG00000232810/ENSG00000006210/ENSG00000118503/ENSG00000163874
GO:0032720	negative regulation of tumor necrosis factor production	4	0.777372	1.61586	0.0122683	0.198876	0.180476	65	tags=100%, list=23%, signal=78%	ENSG00000006210/ENSG00000118503/ENSG00000168961/ENSG00000163874
GO:1903556	negative regulation of tumor necrosis factor superfamily cytokine production	4	0.777372	1.61586	0.0122683	0.198876	0.180476	65	tags=100%, list=23%, signal=78%	ENSG00000006210/ENSG00000118503/ENSG00000168961/ENSG00000163874
GO:0030029	actin filament-based process	18	0.516883	1.71846	0.0123447	0.199376	0.18093	16	tags=28%, list=6%, signal=28%	ENSG00000007908/ENSG00000232810/ENSG00000006210/ENSG00000163739/ENSG00000108342
GO:0051090	regulation of DNA-binding transcription factor activity	29	0.482288	1.74676	0.0123753	0.199376	0.18093	74	tags=52%, list=27%, signal=42%	ENSG00000232810/ENSG00000006210/ENSG00000108342/ENSG00000125538/ENSG00000136244/ENSG00000137462/ENSG00000056558/ENSG00000151651/ENSG00000118503/ENSG00000134070/ENSG00000168961/ENSG00000090339/ENSG00000163874/ENSG00000173334/ENSG00000077150
GO:0050766	positive regulation of phagocytosis	7	0.68314	1.73971	0.0127878	0.205176	0.186193	58	tags=71%, list=21%, signal=58%	ENSG00000232810/ENSG00000108691/ENSG00000125538/ENSG00000163661/ENSG00000125730
GO:0035584	calcium-mediated signaling using intracellular calcium source	3	0.842797	1.59418	0.0128137	0.205176	0.186193	13	tags=67%, list=5%, signal=64%	ENSG00000162692/ENSG00000115009
GO:0006984	ER-nucleus signaling pathway	4	0.773356	1.60751	0.0129197	0.206243	0.187162	9	tags=50%, list=3%, signal=49%	ENSG00000169429/ENSG00000108691
GO:0022008	neurogenesis	37	0.43896	1.66665	0.0131412	0.207104	0.187944	72	tags=46%, list=26%, signal=39%	ENSG00000232810/ENSG00000006210/ENSG00000108691/ENSG00000204482/ENSG00000125538/ENSG00000135919/ENSG00000136244/ENSG00000153993/ENSG00000137462/ENSG00000058085/ENSG00000075213/ENSG00000226979/ENSG00000067798/ENSG00000125730/ENSG00000138675/ENSG00000138411/ENSG00000122641
GO:0002637	regulation of immunoglobulin production	2	0.902174	1.47722	0.0132901	0.207104	0.187944	29	tags=100%, list=10%, signal=90%	ENSG00000232810/ENSG00000136244
GO:0002726	positive regulation of T cell cytokine production	2	0.902174	1.47722	0.0132901	0.207104	0.187944	29	tags=100%, list=10%, signal=90%	ENSG00000125538/ENSG00000136244
GO:0035743	CD4-positive, alpha-beta T cell cytokine production	2	0.902174	1.47722	0.0132901	0.207104	0.187944	29	tags=100%, list=10%, signal=90%	ENSG00000125538/ENSG00000136244
GO:0051023	regulation of immunoglobulin secretion	2	0.902174	1.47722	0.0132901	0.207104	0.187944	29	tags=100%, list=10%, signal=90%	ENSG00000232810/ENSG00000136244
GO:0070050	neuron cellular homeostasis	2	0.902174	1.47722	0.0132901	0.207104	0.187944	29	tags=100%, list=10%, signal=90%	ENSG00000006210/ENSG00000136244
GO:2000659	regulation of interleukin-1-mediated signaling pathway	2	0.902174	1.47722	0.0132901	0.207104	0.187944	29	tags=100%, list=10%, signal=90%	ENSG00000136689/ENSG00000136244
GO:2000660	negative regulation of interleukin-1-mediated signaling pathway	2	0.902174	1.47722	0.0132901	0.207104	0.187944	29	tags=100%, list=10%, signal=90%	ENSG00000136689/ENSG00000136244
GO:0007159	leukocyte cell-cell adhesion	28	0.472736	1.6931	0.0137233	0.212184	0.192553	120	tags=75%, list=43%, signal=47%	ENSG00000007908/ENSG00000232810/ENSG00000162692/ENSG00000108691/ENSG00000125538/ENSG00000115008/ENSG00000136244/ENSG00000151651/ENSG00000102524/ENSG00000168685/ENSG00000168961/ENSG00000090339/ENSG00000163874/ENSG00000026508/ENSG00000104312/ENSG00000144802/ENSG00000146072/ENSG00000105639/ENSG00000110944/ENSG00000134954/ENSG00000125347
GO:0030336	negative regulation of cell migration	12	0.576192	1.70255	0.0137377	0.212184	0.192553	77	tags=67%, list=28%, signal=50%	ENSG00000232810/ENSG00000006210/ENSG00000108691/ENSG00000162892/ENSG00000075213/ENSG00000067798/ENSG00000173334/ENSG00000091879
GO:2000146	negative regulation of cell motility	12	0.576192	1.70255	0.0137377	0.212184	0.192553	77	tags=67%, list=28%, signal=50%	ENSG00000232810/ENSG00000006210/ENSG00000108691/ENSG00000162892/ENSG00000075213/ENSG00000067798/ENSG00000173334/ENSG00000091879
GO:0010721	negative regulation of cell development	12	0.575945	1.70182	0.0139149	0.21429	0.194464	51	tags=50%, list=18%, signal=43%	ENSG00000232810/ENSG00000006210/ENSG00000125538/ENSG00000136244/ENSG00000153993/ENSG00000075213
GO:0002819	regulation of adaptive immune response	17	0.532005	1.73763	0.0140153	0.215203	0.195293	120	tags=88%, list=43%, signal=53%	ENSG00000232810/ENSG00000125538/ENSG00000136244/ENSG00000102524/ENSG00000118503/ENSG00000168685/ENSG00000226979/ENSG00000125730/ENSG00000163874/ENSG00000104312/ENSG00000144802/ENSG00000105639/ENSG00000110944/ENSG00000204642/ENSG00000125347
GO:0071840	cellular component organization or biogenesis	106	0.357139	1.53051	0.0141947	0.217319	0.197214	74	tags=36%, list=27%, signal=43%	ENSG00000007908/ENSG00000232810/ENSG00000006210/ENSG00000162692/ENSG00000108691/ENSG00000204482/ENSG00000163739/ENSG00000108342/ENSG00000169245/ENSG00000125538/ENSG00000159261/ENSG00000135919/ENSG00000115008/ENSG00000136244/ENSG00000153993/ENSG00000137462/ENSG00000058085/ENSG00000056558/ENSG00000163131/ENSG00000154451/ENSG00000151651/ENSG00000101670/ENSG00000196878/ENSG00000118503/ENSG00000168685…
GO:0030072	peptide hormone secretion	8	0.660395	1.75778	0.0144325	0.219039	0.198774	29	tags=50%, list=10%, signal=46%	ENSG00000232810/ENSG00000136689/ENSG00000125538/ENSG00000136244
GO:0032651	regulation of interleukin-1 beta production	8	0.660213	1.7573	0.0144325	0.219039	0.198774	65	tags=75%, list=23%, signal=59%	ENSG00000232810/ENSG00000006210/ENSG00000136244/ENSG00000118503/ENSG00000168961/ENSG00000163874
GO:0051402	neuron apoptotic process	8	0.660532	1.75815	0.0144325	0.219039	0.198774	50	tags=62%, list=18%, signal=53%	ENSG00000232810/ENSG00000006210/ENSG00000108691/ENSG00000151651/ENSG00000112096
GO:0007187	G protein-coupled receptor signaling pathway, coupled to cyclic nucleotide second messenger	5	0.738513	1.67717	0.0145017	0.219212	0.198931	26	tags=60%, list=9%, signal=55%	ENSG00000108691/ENSG00000169245/ENSG00000169248
GO:0050768	negative regulation of neurogenesis	11	0.608146	1.76089	0.0145276	0.219212	0.198931	51	tags=55%, list=18%, signal=46%	ENSG00000232810/ENSG00000006210/ENSG00000125538/ENSG00000136244/ENSG00000153993/ENSG00000075213
GO:0030097	hemopoiesis	38	0.434312	1.65619	0.0150074	0.225188	0.204354	140	tags=79%, list=50%, signal=45%	ENSG00000232810/ENSG00000162692/ENSG00000134363/ENSG00000108342/ENSG00000125538/ENSG00000115008/ENSG00000136244/ENSG00000137462/ENSG00000028277/ENSG00000151651/ENSG00000166523/ENSG00000168685/ENSG00000168961/ENSG00000104856/ENSG00000163874/ENSG00000173334/ENSG00000122641/ENSG00000168062/ENSG00000184371/ENSG00000048052/ENSG00000104312/ENSG00000144802/ENSG00000105639/ENSG00000110944/ENSG00000134954…
GO:0043087	regulation of GTPase activity	6	0.707043	1.69918	0.0150605	0.225188	0.204354	13	tags=50%, list=5%, signal=49%	ENSG00000006210/ENSG00000108691/ENSG00000115009
GO:0043547	positive regulation of GTPase activity	6	0.707043	1.69918	0.0150605	0.225188	0.204354	13	tags=50%, list=5%, signal=49%	ENSG00000006210/ENSG00000108691/ENSG00000115009
GO:0050708	regulation of protein secretion	16	0.526826	1.70329	0.0151448	0.225188	0.204354	70	tags=56%, list=25%, signal=45%	ENSG00000232810/ENSG00000125538/ENSG00000115008/ENSG00000136244/ENSG00000137462/ENSG00000151651/ENSG00000166523/ENSG00000173432/ENSG00000064651
GO:0045428	regulation of nitric oxide biosynthetic process	6	0.705727	1.69601	0.01526	0.225188	0.204354	65	tags=83%, list=23%, signal=65%	ENSG00000232810/ENSG00000125538/ENSG00000163661/ENSG00000090339/ENSG00000163874
GO:1903426	regulation of reactive oxygen species biosynthetic process	6	0.705727	1.69601	0.01526	0.225188	0.204354	65	tags=83%, list=23%, signal=65%	ENSG00000232810/ENSG00000125538/ENSG00000163661/ENSG00000090339/ENSG00000163874
GO:0036230	granulocyte activation	22	0.48985	1.6921	0.0152677	0.225188	0.204354	68	tags=50%, list=24%, signal=41%	ENSG00000123610/ENSG00000169429/ENSG00000124875/ENSG00000163739/ENSG00000137462/ENSG00000163131/ENSG00000151651/ENSG00000163661/ENSG00000125730/ENSG00000096696/ENSG00000171236
GO:0042119	neutrophil activation	22	0.48985	1.6921	0.0152677	0.225188	0.204354	68	tags=50%, list=24%, signal=41%	ENSG00000123610/ENSG00000169429/ENSG00000124875/ENSG00000163739/ENSG00000137462/ENSG00000163131/ENSG00000151651/ENSG00000163661/ENSG00000125730/ENSG00000096696/ENSG00000171236
GO:0042327	positive regulation of phosphorylation	43	0.416187	1.62601	0.0155585	0.228833	0.207662	72	tags=44%, list=26%, signal=39%	ENSG00000232810/ENSG00000006210/ENSG00000108691/ENSG00000115009/ENSG00000108342/ENSG00000125538/ENSG00000162892/ENSG00000136244/ENSG00000056558/ENSG00000151651/ENSG00000075213/ENSG00000134070/ENSG00000168961/ENSG00000125730/ENSG00000090339/ENSG00000173432/ENSG00000163874/ENSG00000138675/ENSG00000122641
GO:0050793	regulation of developmental process	87	0.372145	1.57892	0.0158499	0.232465	0.210958	73	tags=38%, list=26%, signal=41%	ENSG00000169429/ENSG00000232810/ENSG00000006210/ENSG00000108691/ENSG00000134363/ENSG00000204482/ENSG00000136689/ENSG00000108342/ENSG00000169245/ENSG00000125538/ENSG00000135919/ENSG00000115008/ENSG00000136244/ENSG00000153993/ENSG00000137462/ENSG00000151651/ENSG00000102524/ENSG00000118503/ENSG00000168685/ENSG00000112096/ENSG00000075213/ENSG00000226979/ENSG00000168961/ENSG00000125730/ENSG00000090339…
GO:1904035	regulation of epithelial cell apoptotic process	7	0.66773	1.70047	0.0160568	0.233797	0.212166	60	tags=71%, list=22%, signal=57%	ENSG00000232810/ENSG00000108691/ENSG00000136244/ENSG00000118503/ENSG00000090339
GO:0045687	positive regulation of glial cell differentiation	2	0.887681	1.45349	0.0160746	0.233797	0.212166	33	tags=100%, list=12%, signal=89%	ENSG00000135919/ENSG00000137462
GO:0050807	regulation of synapse organization	2	0.887681	1.45349	0.0160746	0.233797	0.212166	33	tags=100%, list=12%, signal=89%	ENSG00000232810/ENSG00000137462
GO:1901214	regulation of neuron death	11	0.603925	1.74867	0.0161518	0.234268	0.212594	50	tags=55%, list=18%, signal=47%	ENSG00000232810/ENSG00000006210/ENSG00000108691/ENSG00000108342/ENSG00000151651/ENSG00000112096
GO:0002292	T cell differentiation involved in immune response	9	0.613383	1.67874	0.0162168	0.234562	0.212861	113	tags=100%, list=41%, signal=61%	ENSG00000136244/ENSG00000166523/ENSG00000168961/ENSG00000104856/ENSG00000163874/ENSG00000104312/ENSG00000144802/ENSG00000105639/ENSG00000110944
GO:0042110	T cell activation	28	0.465427	1.66693	0.0164218	0.236873	0.214958	120	tags=75%, list=43%, signal=47%	ENSG00000162692/ENSG00000108691/ENSG00000125538/ENSG00000115008/ENSG00000136244/ENSG00000151651/ENSG00000102524/ENSG00000166523/ENSG00000168685/ENSG00000168961/ENSG00000104856/ENSG00000090339/ENSG00000163874/ENSG00000196684/ENSG00000026508/ENSG00000104312/ENSG00000144802/ENSG00000146072/ENSG00000105639/ENSG00000110944/ENSG00000125347
GO:0050767	regulation of neurogenesis	21	0.486264	1.6616	0.0167414	0.240819	0.218539	52	tags=43%, list=19%, signal=38%	ENSG00000232810/ENSG00000006210/ENSG00000125538/ENSG00000135919/ENSG00000136244/ENSG00000153993/ENSG00000137462/ENSG00000075213/ENSG00000226979
GO:0045930	negative regulation of mitotic cell cycle	4	0.764847	1.58982	0.0168281	0.240828	0.218547	9	tags=50%, list=3%, signal=49%	ENSG00000232810/ENSG00000108691
GO:0002335	mature B cell differentiation	2	0.884058	1.44755	0.016834	0.240828	0.218547	34	tags=100%, list=12%, signal=88%	ENSG00000136244/ENSG00000028277
GO:0002706	regulation of lymphocyte mediated immunity	11	0.601568	1.74185	0.0170541	0.243312	0.220801	58	tags=64%, list=21%, signal=52%	ENSG00000232810/ENSG00000125538/ENSG00000136244/ENSG00000168685/ENSG00000226979/ENSG00000168961/ENSG00000125730
GO:2001234	negative regulation of apoptotic signaling pathway	12	0.565305	1.67038	0.0171056	0.243382	0.220865	60	tags=58%, list=22%, signal=48%	ENSG00000232810/ENSG00000006210/ENSG00000125538/ENSG00000115008/ENSG00000118503/ENSG00000112096/ENSG00000090339
GO:0007259	receptor signaling pathway via JAK-STAT	8	0.650085	1.73034	0.0172624	0.244948	0.222286	29	tags=50%, list=10%, signal=46%	ENSG00000232810/ENSG00000108691/ENSG00000162892/ENSG00000136244
GO:0070661	leukocyte proliferation	22	0.481631	1.66371	0.0173728	0.245348	0.222649	57	tags=45%, list=21%, signal=39%	ENSG00000006210/ENSG00000162692/ENSG00000204482/ENSG00000125538/ENSG00000115008/ENSG00000136244/ENSG00000102524/ENSG00000118503/ENSG00000168685/ENSG00000168961
GO:1903047	mitotic cell cycle process	7	0.662676	1.6876	0.0174029	0.245348	0.222649	79	tags=86%, list=28%, signal=63%	ENSG00000108691/ENSG00000125538/ENSG00000115008/ENSG00000138411/ENSG00000122641/ENSG00000139289
GO:0046889	positive regulation of lipid biosynthetic process	3	0.826646	1.56363	0.0174311	0.245348	0.222649	20	tags=67%, list=7%, signal=63%	ENSG00000232810/ENSG00000125538
GO:0000278	mitotic cell cycle	10	0.597259	1.68626	0.0176594	0.247895	0.22496	79	tags=70%, list=28%, signal=52%	ENSG00000232810/ENSG00000108691/ENSG00000125538/ENSG00000115008/ENSG00000138411/ENSG00000122641/ENSG00000139289
GO:0050918	positive chemotaxis	7	0.66079	1.68279	0.0179798	0.251717	0.228429	17	tags=43%, list=6%, signal=41%	ENSG00000169429/ENSG00000006210/ENSG00000169245
GO:0009966	regulation of signal transduction	92	0.351004	1.4969	0.0182834	0.255285	0.231667	69	tags=35%, list=25%, signal=39%	ENSG00000169429/ENSG00000232810/ENSG00000006210/ENSG00000108691/ENSG00000134363/ENSG00000115009/ENSG00000136689/ENSG00000108342/ENSG00000125538/ENSG00000162892/ENSG00000135919/ENSG00000115008/ENSG00000123689/ENSG00000136244/ENSG00000137462/ENSG00000056558/ENSG00000151651/ENSG00000118503/ENSG00000168685/ENSG00000112096/ENSG00000075213/ENSG00000134070/ENSG00000168961/ENSG00000125730/ENSG00000090339…
GO:0031347	regulation of defense response	46	0.410467	1.63105	0.018469	0.257191	0.233396	65	tags=39%, list=23%, signal=36%	ENSG00000007908/ENSG00000123610/ENSG00000232810/ENSG00000006210/ENSG00000124875/ENSG00000125538/ENSG00000136244/ENSG00000137462/ENSG00000154451/ENSG00000151651/ENSG00000166523/ENSG00000118503/ENSG00000226979/ENSG00000168961/ENSG00000125730/ENSG00000104856/ENSG00000173432/ENSG00000163874
GO:0097696	receptor signaling pathway via STAT	9	0.607119	1.6616	0.018654	0.259078	0.235109	49	tags=56%, list=18%, signal=47%	ENSG00000232810/ENSG00000108691/ENSG00000162892/ENSG00000136244/ENSG00000168685
GO:0050865	regulation of cell activation	32	0.455731	1.66988	0.0188528	0.261146	0.236985	120	tags=72%, list=43%, signal=46%	ENSG00000006210/ENSG00000162692/ENSG00000108691/ENSG00000204482/ENSG00000125538/ENSG00000135919/ENSG00000115008/ENSG00000136244/ENSG00000151651/ENSG00000102524/ENSG00000118503/ENSG00000168685/ENSG00000168961/ENSG00000163874/ENSG00000122641/ENSG00000104312/ENSG00000144802/ENSG00000146072/ENSG00000105639/ENSG00000110944/ENSG00000204642/ENSG00000173918/ENSG00000125347
GO:0001932	regulation of protein phosphorylation	57	0.381068	1.55134	0.0193652	0.267314	0.242583	72	tags=40%, list=26%, signal=38%	ENSG00000232810/ENSG00000006210/ENSG00000108691/ENSG00000115009/ENSG00000108342/ENSG00000169245/ENSG00000125538/ENSG00000162892/ENSG00000136244/ENSG00000056558/ENSG00000151651/ENSG00000118503/ENSG00000075213/ENSG00000134070/ENSG00000168961/ENSG00000125730/ENSG00000090339/ENSG00000173432/ENSG00000120875/ENSG00000163874/ENSG00000173334/ENSG00000138675/ENSG00000122641
GO:0050794	regulation of cellular process	214	0.369929	1.54699	0.0194531	0.267314	0.242583	90	tags=36%, list=32%, signal=107%	ENSG00000007908/ENSG00000227507/ENSG00000123610/ENSG00000169429/ENSG00000232810/ENSG00000006210/ENSG00000124875/ENSG00000162692/ENSG00000108691/ENSG00000134363/ENSG00000204482/ENSG00000115009/ENSG00000136689/ENSG00000163739/ENSG00000108342/ENSG00000169245/ENSG00000163735/ENSG00000125538/ENSG00000162892/ENSG00000135919/ENSG00000169248/ENSG00000115008/ENSG00000123689/ENSG00000136244/ENSG00000153993…
GO:0008544	epidermis development	8	0.643447	1.71267	0.0195281	0.267314	0.242583	72	tags=75%, list=26%, signal=57%	ENSG00000232810/ENSG00000134363/ENSG00000058085/ENSG00000196878/ENSG00000096696/ENSG00000122641
GO:0043408	regulation of MAPK cascade	37	0.426006	1.61747	0.0195357	0.267314	0.242583	67	tags=43%, list=24%, signal=38%	ENSG00000232810/ENSG00000006210/ENSG00000108691/ENSG00000115009/ENSG00000125538/ENSG00000136244/ENSG00000056558/ENSG00000151651/ENSG00000075213/ENSG00000134070/ENSG00000168961/ENSG00000090339/ENSG00000173432/ENSG00000120875/ENSG00000163874/ENSG00000173334
GO:0051235	maintenance of location	18	0.502723	1.67138	0.0195533	0.267314	0.242583	29	tags=33%, list=10%, signal=32%	ENSG00000232810/ENSG00000006210/ENSG00000169245/ENSG00000125538/ENSG00000169248/ENSG00000136244
GO:0043491	protein kinase B signaling	15	0.532513	1.69004	0.0196924	0.268476	0.243638	20	tags=33%, list=7%, signal=33%	ENSG00000232810/ENSG00000006210/ENSG00000108691/ENSG00000108342/ENSG00000125538
GO:0002694	regulation of leukocyte activation	30	0.440775	1.60746	0.0197409	0.268476	0.243638	72	tags=47%, list=26%, signal=39%	ENSG00000006210/ENSG00000162692/ENSG00000108691/ENSG00000204482/ENSG00000125538/ENSG00000115008/ENSG00000136244/ENSG00000151651/ENSG00000102524/ENSG00000118503/ENSG00000168685/ENSG00000168961/ENSG00000163874/ENSG00000122641
GO:0048535	lymph node development	3	0.821818	1.55449	0.0202016	0.27403	0.248677	52	tags=100%, list=19%, signal=82%	ENSG00000227507/ENSG00000168685/ENSG00000226979
GO:0060255	regulation of macromolecule metabolic process	139	0.346751	1.50816	0.0203171	0.274431	0.249041	74	tags=34%, list=27%, signal=50%	ENSG00000007908/ENSG00000227507/ENSG00000169429/ENSG00000232810/ENSG00000006210/ENSG00000124875/ENSG00000108691/ENSG00000134363/ENSG00000115009/ENSG00000108342/ENSG00000169245/ENSG00000125538/ENSG00000162892/ENSG00000135919/ENSG00000115008/ENSG00000136244/ENSG00000105825/ENSG00000211448/ENSG00000137462/ENSG00000028277/ENSG00000056558/ENSG00000154451/ENSG00000151651/ENSG00000166523/ENSG00000101670…
GO:0051403	stress-activated MAPK cascade	13	0.561237	1.7195	0.020336	0.274431	0.249041	67	tags=62%, list=24%, signal=49%	ENSG00000232810/ENSG00000125538/ENSG00000056558/ENSG00000075213/ENSG00000134070/ENSG00000168961/ENSG00000163874/ENSG00000173334
GO:0030155	regulation of cell adhesion	50	0.397954	1.59452	0.0206268	0.276757	0.251152	135	tags=70%, list=49%, signal=44%	ENSG00000007908/ENSG00000169429/ENSG00000232810/ENSG00000006210/ENSG00000162692/ENSG00000108691/ENSG00000136689/ENSG00000125538/ENSG00000135919/ENSG00000115008/ENSG00000136244/ENSG00000151651/ENSG00000102524/ENSG00000168685/ENSG00000168961/ENSG00000090339/ENSG00000173432/ENSG00000163874/ENSG00000091879/ENSG00000154175/ENSG00000184371/ENSG00000026508/ENSG00000104312/ENSG00000144802/ENSG00000205502…
GO:0046651	lymphocyte proliferation	16	0.515078	1.66531	0.0206853	0.276757	0.251152	57	tags=50%, list=21%, signal=42%	ENSG00000162692/ENSG00000204482/ENSG00000125538/ENSG00000115008/ENSG00000136244/ENSG00000102524/ENSG00000168685/ENSG00000168961
GO:0040013	negative regulation of locomotion	15	0.529924	1.68182	0.0207198	0.276757	0.251152	77	tags=60%, list=28%, signal=46%	ENSG00000232810/ENSG00000006210/ENSG00000108691/ENSG00000162892/ENSG00000153993/ENSG00000075213/ENSG00000067798/ENSG00000173334/ENSG00000091879
GO:0051271	negative regulation of cellular component movement	15	0.529924	1.68182	0.0207198	0.276757	0.251152	77	tags=60%, list=28%, signal=46%	ENSG00000232810/ENSG00000006210/ENSG00000108691/ENSG00000162892/ENSG00000153993/ENSG00000075213/ENSG00000067798/ENSG00000173334/ENSG00000091879
GO:0072677	eosinophil migration	4	0.756033	1.5715	0.0209537	0.279169	0.253341	43	tags=75%, list=15%, signal=64%	ENSG00000006210/ENSG00000108691/ENSG00000151651
GO:0051651	maintenance of location in cell	6	0.69099	1.6606	0.0210487	0.279723	0.253843	26	tags=50%, list=9%, signal=46%	ENSG00000006210/ENSG00000169245/ENSG00000169248
GO:0051783	regulation of nuclear division	4	0.755474	1.57034	0.0211708	0.280634	0.25467	71	tags=100%, list=26%, signal=76%	ENSG00000125538/ENSG00000115008/ENSG00000163132/ENSG00000138411
GO:0006766	vitamin metabolic process	3	0.817599	1.54651	0.0218177	0.281837	0.255762	20	tags=67%, list=7%, signal=63%	ENSG00000232810/ENSG00000125538
GO:0006775	fat-soluble vitamin metabolic process	3	0.817599	1.54651	0.0218177	0.281837	0.255762	20	tags=67%, list=7%, signal=63%	ENSG00000232810/ENSG00000125538
GO:0009110	vitamin biosynthetic process	3	0.817599	1.54651	0.0218177	0.281837	0.255762	20	tags=67%, list=7%, signal=63%	ENSG00000232810/ENSG00000125538
GO:0030656	regulation of vitamin metabolic process	3	0.817599	1.54651	0.0218177	0.281837	0.255762	20	tags=67%, list=7%, signal=63%	ENSG00000232810/ENSG00000125538
GO:0042359	vitamin D metabolic process	3	0.817599	1.54651	0.0218177	0.281837	0.255762	20	tags=67%, list=7%, signal=63%	ENSG00000232810/ENSG00000125538
GO:0042362	fat-soluble vitamin biosynthetic process	3	0.817599	1.54651	0.0218177	0.281837	0.255762	20	tags=67%, list=7%, signal=63%	ENSG00000232810/ENSG00000125538
GO:0042368	vitamin D biosynthetic process	3	0.817599	1.54651	0.0218177	0.281837	0.255762	20	tags=67%, list=7%, signal=63%	ENSG00000232810/ENSG00000125538
GO:0060556	regulation of vitamin D biosynthetic process	3	0.817599	1.54651	0.0218177	0.281837	0.255762	20	tags=67%, list=7%, signal=63%	ENSG00000232810/ENSG00000125538
GO:0060558	regulation of calcidiol 1-monooxygenase activity	3	0.817599	1.54651	0.0218177	0.281837	0.255762	20	tags=67%, list=7%, signal=63%	ENSG00000232810/ENSG00000125538
GO:0071677	positive regulation of mononuclear cell migration	3	0.816694	1.5448	0.0218177	0.281837	0.255762	17	tags=67%, list=6%, signal=63%	ENSG00000232810/ENSG00000169245
GO:0048871	multicellular organismal homeostasis	18	0.497993	1.65565	0.0218537	0.281837	0.255762	48	tags=44%, list=17%, signal=39%	ENSG00000232810/ENSG00000125538/ENSG00000115008/ENSG00000123689/ENSG00000136244/ENSG00000211448/ENSG00000151651/ENSG00000118503
GO:0007155	cell adhesion	66	0.37359	1.54592	0.0220874	0.283455	0.25723	66	tags=35%, list=24%, signal=35%	ENSG00000007908/ENSG00000123610/ENSG00000169429/ENSG00000232810/ENSG00000006210/ENSG00000162692/ENSG00000108691/ENSG00000136689/ENSG00000125538/ENSG00000159261/ENSG00000135919/ENSG00000115008/ENSG00000136244/ENSG00000058085/ENSG00000151651/ENSG00000102524/ENSG00000196878/ENSG00000168685/ENSG00000168961/ENSG00000090339/ENSG00000173432/ENSG00000163874/ENSG00000096696
GO:0022610	biological adhesion	66	0.37359	1.54592	0.0220874	0.283455	0.25723	66	tags=35%, list=24%, signal=35%	ENSG00000007908/ENSG00000123610/ENSG00000169429/ENSG00000232810/ENSG00000006210/ENSG00000162692/ENSG00000108691/ENSG00000136689/ENSG00000125538/ENSG00000159261/ENSG00000135919/ENSG00000115008/ENSG00000136244/ENSG00000058085/ENSG00000151651/ENSG00000102524/ENSG00000196878/ENSG00000168685/ENSG00000168961/ENSG00000090339/ENSG00000173432/ENSG00000163874/ENSG00000096696
GO:0008347	glial cell migration	3	0.81595	1.54339	0.0222795	0.285221	0.258833	9	tags=67%, list=3%, signal=65%	ENSG00000006210/ENSG00000108691
GO:0032944	regulation of mononuclear cell proliferation	15	0.526278	1.67025	0.0224321	0.286475	0.259971	120	tags=87%, list=43%, signal=52%	ENSG00000162692/ENSG00000204482/ENSG00000125538/ENSG00000115008/ENSG00000136244/ENSG00000102524/ENSG00000168961/ENSG00000184371/ENSG00000104312/ENSG00000146072/ENSG00000105639/ENSG00000110944/ENSG00000125347
GO:0051234	establishment of localization	101	0.342887	1.4679	0.0230954	0.294227	0.267006	72	tags=35%, list=26%, signal=40%	ENSG00000007908/ENSG00000123610/ENSG00000169429/ENSG00000232810/ENSG00000006210/ENSG00000108691/ENSG00000136689/ENSG00000163739/ENSG00000169245/ENSG00000125538/ENSG00000135919/ENSG00000166920/ENSG00000169248/ENSG00000115008/ENSG00000136244/ENSG00000137462/ENSG00000028277/ENSG00000163131/ENSG00000185215/ENSG00000151651/ENSG00000102524/ENSG00000166523/ENSG00000101670/ENSG00000118503/ENSG00000163661…
GO:0031401	positive regulation of protein modification process	44	0.404176	1.58305	0.0232844	0.294935	0.267648	72	tags=43%, list=26%, signal=38%	ENSG00000232810/ENSG00000006210/ENSG00000108691/ENSG00000115009/ENSG00000108342/ENSG00000125538/ENSG00000162892/ENSG00000136244/ENSG00000056558/ENSG00000151651/ENSG00000075213/ENSG00000134070/ENSG00000168961/ENSG00000125730/ENSG00000090339/ENSG00000173432/ENSG00000163874/ENSG00000138675/ENSG00000122641
GO:0070498	interleukin-1-mediated signaling pathway	8	0.633423	1.68599	0.0233199	0.294935	0.267648	55	tags=62%, list=20%, signal=52%	ENSG00000136689/ENSG00000125538/ENSG00000115008/ENSG00000136244/ENSG00000134070
GO:1901215	negative regulation of neuron death	8	0.632982	1.68482	0.0233199	0.294935	0.267648	50	tags=62%, list=18%, signal=53%	ENSG00000006210/ENSG00000108691/ENSG00000108342/ENSG00000151651/ENSG00000112096
GO:0050715	positive regulation of cytokine secretion	5	0.712833	1.61885	0.0236949	0.297744	0.270198	61	tags=80%, list=22%, signal=64%	ENSG00000232810/ENSG00000115008/ENSG00000166523/ENSG00000173432
GO:0010001	glial cell differentiation	11	0.582043	1.68531	0.023758	0.297744	0.270198	33	tags=45%, list=12%, signal=42%	ENSG00000232810/ENSG00000125538/ENSG00000135919/ENSG00000136244/ENSG00000137462
GO:0002673	regulation of acute inflammatory response	7	0.650224	1.65589	0.0237695	0.297744	0.270198	58	tags=71%, list=21%, signal=58%	ENSG00000232810/ENSG00000125538/ENSG00000136244/ENSG00000151651/ENSG00000125730
GO:0002675	positive regulation of acute inflammatory response	7	0.650224	1.65589	0.0237695	0.297744	0.270198	58	tags=71%, list=21%, signal=58%	ENSG00000232810/ENSG00000125538/ENSG00000136244/ENSG00000151651/ENSG00000125730
GO:0050999	regulation of nitric-oxide synthase activity	5	0.712057	1.61709	0.0241143	0.300923	0.273082	27	tags=60%, list=10%, signal=55%	ENSG00000232810/ENSG00000125538/ENSG00000115008
GO:0003151	outflow tract morphogenesis	4	-0.686131	-1.62201	0.0241382	0.300923	0.273082	91	tags=100%, list=33%, signal=68%	ENSG00000101384/ENSG00000075223/ENSG00000137834
GO:1901623	regulation of lymphocyte chemotaxis	3	0.810204	1.53253	0.0243619	0.30274	0.274731	17	tags=67%, list=6%, signal=63%	ENSG00000108691/ENSG00000169245
GO:1903533	regulation of protein targeting	2	-0.90942	-1.60762	0.0244516	0.30274	0.274731	28	tags=100%, list=10%, signal=91%	ENSG00000170379
GO:0043588	skin development	8	0.628768	1.6736	0.0244574	0.30274	0.274731	10	tags=38%, list=4%, signal=37%	ENSG00000227507/ENSG00000232810/ENSG00000134363
GO:0051960	regulation of nervous system development	22	0.469349	1.62129	0.0245165	0.302756	0.274746	52	tags=41%, list=19%, signal=36%	ENSG00000232810/ENSG00000006210/ENSG00000125538/ENSG00000135919/ENSG00000136244/ENSG00000153993/ENSG00000137462/ENSG00000075213/ENSG00000226979
GO:2001259	positive regulation of cation channel activity	2	0.865942	1.41789	0.0249345	0.307193	0.278773	39	tags=100%, list=14%, signal=87%	ENSG00000108691/ENSG00000163131
GO:0010564	regulation of cell cycle process	6	0.683029	1.64146	0.0250578	0.307987	0.279493	71	tags=83%, list=26%, signal=63%	ENSG00000108691/ENSG00000125538/ENSG00000115008/ENSG00000163132/ENSG00000138411
GO:0048584	positive regulation of response to stimulus	89	0.344426	1.46406	0.0251509	0.308408	0.279875	72	tags=36%, list=26%, signal=39%	ENSG00000169429/ENSG00000232810/ENSG00000006210/ENSG00000108691/ENSG00000115009/ENSG00000108342/ENSG00000169245/ENSG00000125538/ENSG00000162892/ENSG00000123689/ENSG00000136244/ENSG00000137462/ENSG00000056558/ENSG00000154451/ENSG00000151651/ENSG00000102524/ENSG00000166523/ENSG00000118503/ENSG00000168685/ENSG00000075213/ENSG00000226979/ENSG00000134070/ENSG00000168961/ENSG00000125730/ENSG00000104856…
GO:0032103	positive regulation of response to external stimulus	36	0.422251	1.59583	0.0252143	0.308463	0.279925	59	tags=39%, list=21%, signal=35%	ENSG00000169429/ENSG00000232810/ENSG00000006210/ENSG00000169245/ENSG00000125538/ENSG00000136244/ENSG00000137462/ENSG00000154451/ENSG00000151651/ENSG00000166523/ENSG00000226979/ENSG00000168961/ENSG00000125730/ENSG00000104856
GO:0051129	negative regulation of cellular component organization	15	0.520197	1.65095	0.0258568	0.315497	0.286308	54	tags=47%, list=19%, signal=40%	ENSG00000232810/ENSG00000169245/ENSG00000125538/ENSG00000153993/ENSG00000137462/ENSG00000075213/ENSG00000067798
GO:0006810	transport	98	0.342522	1.46134	0.0261307	0.315497	0.286308	72	tags=35%, list=26%, signal=40%	ENSG00000007908/ENSG00000123610/ENSG00000169429/ENSG00000232810/ENSG00000006210/ENSG00000108691/ENSG00000136689/ENSG00000163739/ENSG00000169245/ENSG00000125538/ENSG00000135919/ENSG00000166920/ENSG00000169248/ENSG00000115008/ENSG00000136244/ENSG00000137462/ENSG00000028277/ENSG00000163131/ENSG00000185215/ENSG00000151651/ENSG00000102524/ENSG00000166523/ENSG00000101670/ENSG00000163661/ENSG00000168961…
GO:0010646	regulation of cell communication	100	0.340372	1.45458	0.0261307	0.315497	0.286308	72	tags=35%, list=26%, signal=41%	ENSG00000169429/ENSG00000232810/ENSG00000006210/ENSG00000108691/ENSG00000134363/ENSG00000115009/ENSG00000136689/ENSG00000108342/ENSG00000125538/ENSG00000162892/ENSG00000135919/ENSG00000115008/ENSG00000123689/ENSG00000136244/ENSG00000137462/ENSG00000056558/ENSG00000151651/ENSG00000166523/ENSG00000118503/ENSG00000168685/ENSG00000112096/ENSG00000075213/ENSG00000134070/ENSG00000168961/ENSG00000125730…
GO:0023051	regulation of signaling	100	0.340372	1.45458	0.0261307	0.315497	0.286308	72	tags=35%, list=26%, signal=41%	ENSG00000169429/ENSG00000232810/ENSG00000006210/ENSG00000108691/ENSG00000134363/ENSG00000115009/ENSG00000136689/ENSG00000108342/ENSG00000125538/ENSG00000162892/ENSG00000135919/ENSG00000115008/ENSG00000123689/ENSG00000136244/ENSG00000137462/ENSG00000056558/ENSG00000151651/ENSG00000166523/ENSG00000118503/ENSG00000168685/ENSG00000112096/ENSG00000075213/ENSG00000134070/ENSG00000168961/ENSG00000125730…
GO:0042113	B cell activation	12	0.548379	1.62037	0.0261859	0.315497	0.286308	110	tags=83%, list=40%, signal=53%	ENSG00000162692/ENSG00000136244/ENSG00000028277/ENSG00000102524/ENSG00000118503/ENSG00000168685/ENSG00000122641/ENSG00000048052/ENSG00000146072/ENSG00000105639
GO:1901889	negative regulation of cell junction assembly	5	0.708078	1.60805	0.0262111	0.315497	0.286308	33	tags=60%, list=12%, signal=54%	ENSG00000232810/ENSG00000125538/ENSG00000137462
GO:1904407	positive regulation of nitric oxide metabolic process	5	0.70781	1.60744	0.0262111	0.315497	0.286308	60	tags=80%, list=22%, signal=64%	ENSG00000232810/ENSG00000125538/ENSG00000163661/ENSG00000090339
GO:0044093	positive regulation of molecular function	50	0.383252	1.53561	0.0264228	0.316912	0.287592	61	tags=34%, list=22%, signal=32%	ENSG00000007908/ENSG00000232810/ENSG00000006210/ENSG00000108691/ENSG00000115009/ENSG00000163739/ENSG00000108342/ENSG00000125538/ENSG00000136244/ENSG00000137462/ENSG00000056558/ENSG00000163131/ENSG00000151651/ENSG00000134070/ENSG00000168961/ENSG00000090339/ENSG00000173432
GO:0048468	cell development	48	0.380575	1.52454	0.0264496	0.316912	0.287592	71	tags=40%, list=26%, signal=36%	ENSG00000232810/ENSG00000006210/ENSG00000204482/ENSG00000125538/ENSG00000135919/ENSG00000115008/ENSG00000136244/ENSG00000153993/ENSG00000137462/ENSG00000028277/ENSG00000058085/ENSG00000196878/ENSG00000075213/ENSG00000226979/ENSG00000163661/ENSG00000125730/ENSG00000090339/ENSG00000173334/ENSG00000138411
GO:0070374	positive regulation of ERK1 and ERK2 cascade	11	0.577632	1.67254	0.0266597	0.3184	0.288942	13	tags=36%, list=5%, signal=36%	ENSG00000232810/ENSG00000006210/ENSG00000108691/ENSG00000115009
GO:0051251	positive regulation of lymphocyte activation	19	0.499287	1.67827	0.0266955	0.3184	0.288942	57	tags=47%, list=21%, signal=40%	ENSG00000162692/ENSG00000108691/ENSG00000125538/ENSG00000115008/ENSG00000136244/ENSG00000151651/ENSG00000102524/ENSG00000168685/ENSG00000168961
GO:0042129	regulation of T cell proliferation	12	0.546021	1.6134	0.0268985	0.320092	0.290478	120	tags=92%, list=43%, signal=54%	ENSG00000162692/ENSG00000125538/ENSG00000115008/ENSG00000136244/ENSG00000102524/ENSG00000168961/ENSG00000104312/ENSG00000146072/ENSG00000105639/ENSG00000110944/ENSG00000125347
GO:0050727	regulation of inflammatory response	34	0.432691	1.61394	0.0270338	0.320973	0.291278	65	tags=41%, list=23%, signal=36%	ENSG00000007908/ENSG00000123610/ENSG00000232810/ENSG00000006210/ENSG00000125538/ENSG00000136244/ENSG00000137462/ENSG00000154451/ENSG00000151651/ENSG00000118503/ENSG00000226979/ENSG00000125730/ENSG00000173432/ENSG00000163874
GO:0010562	positive regulation of phosphorus metabolic process	45	0.395573	1.56427	0.0274892	0.324906	0.294847	72	tags=42%, list=26%, signal=37%	ENSG00000232810/ENSG00000006210/ENSG00000108691/ENSG00000115009/ENSG00000108342/ENSG00000125538/ENSG00000162892/ENSG00000136244/ENSG00000056558/ENSG00000151651/ENSG00000075213/ENSG00000134070/ENSG00000168961/ENSG00000125730/ENSG00000090339/ENSG00000173432/ENSG00000163874/ENSG00000138675/ENSG00000122641
GO:0045937	positive regulation of phosphate metabolic process	45	0.395573	1.56427	0.0274892	0.324906	0.294847	72	tags=42%, list=26%, signal=37%	ENSG00000232810/ENSG00000006210/ENSG00000108691/ENSG00000115009/ENSG00000108342/ENSG00000125538/ENSG00000162892/ENSG00000136244/ENSG00000056558/ENSG00000151651/ENSG00000075213/ENSG00000134070/ENSG00000168961/ENSG00000125730/ENSG00000090339/ENSG00000173432/ENSG00000163874/ENSG00000138675/ENSG00000122641
GO:0002285	lymphocyte activation involved in immune response	12	0.545687	1.61241	0.027611	0.325611	0.295486	116	tags=92%, list=42%, signal=56%	ENSG00000136244/ENSG00000166523/ENSG00000168961/ENSG00000104856/ENSG00000090339/ENSG00000163874/ENSG00000104312/ENSG00000144802/ENSG00000105639/ENSG00000110944/ENSG00000204642
GO:0042102	positive regulation of T cell proliferation	10	0.57714	1.62945	0.0278486	0.326941	0.296693	57	tags=60%, list=21%, signal=49%	ENSG00000162692/ENSG00000125538/ENSG00000115008/ENSG00000136244/ENSG00000102524/ENSG00000168961
GO:0050671	positive regulation of lymphocyte proliferation	10	0.57714	1.62945	0.0278486	0.326941	0.296693	57	tags=60%, list=21%, signal=49%	ENSG00000162692/ENSG00000125538/ENSG00000115008/ENSG00000136244/ENSG00000102524/ENSG00000168961
GO:0048646	anatomical structure formation involved in morphogenesis	55	0.378121	1.53497	0.0283401	0.328564	0.298166	77	tags=42%, list=28%, signal=38%	ENSG00000169429/ENSG00000232810/ENSG00000006210/ENSG00000108691/ENSG00000169245/ENSG00000125538/ENSG00000115008/ENSG00000136244/ENSG00000137462/ENSG00000185215/ENSG00000151651/ENSG00000102524/ENSG00000196878/ENSG00000118503/ENSG00000125730/ENSG00000163132/ENSG00000120875/ENSG00000163874/ENSG00000171236/ENSG00000064651/ENSG00000122641/ENSG00000077150/ENSG00000091879
GO:0031098	stress-activated protein kinase signaling cascade	14	0.531017	1.65524	0.0285139	0.328564	0.298166	67	tags=57%, list=24%, signal=46%	ENSG00000232810/ENSG00000125538/ENSG00000056558/ENSG00000075213/ENSG00000134070/ENSG00000168961/ENSG00000163874/ENSG00000173334
GO:1904994	regulation of leukocyte adhesion to vascular endothelial cell	5	0.706755	1.60505	0.0287273	0.328564	0.298166	60	tags=80%, list=22%, signal=64%	ENSG00000007908/ENSG00000232810/ENSG00000136244/ENSG00000090339
GO:1904996	positive regulation of leukocyte adhesion to vascular endothelial cell	5	0.706755	1.60505	0.0287273	0.328564	0.298166	60	tags=80%, list=22%, signal=64%	ENSG00000007908/ENSG00000232810/ENSG00000136244/ENSG00000090339
GO:0002791	regulation of peptide secretion	17	0.495972	1.61994	0.0288248	0.328564	0.298166	70	tags=53%, list=25%, signal=42%	ENSG00000232810/ENSG00000125538/ENSG00000115008/ENSG00000136244/ENSG00000137462/ENSG00000151651/ENSG00000166523/ENSG00000173432/ENSG00000064651
GO:0007157	heterophilic cell-cell adhesion via plasma membrane cell adhesion molecules	3	0.802466	1.51789	0.0290021	0.328564	0.298166	8	tags=67%, list=3%, signal=65%	ENSG00000007908/ENSG00000162692
GO:0031325	positive regulation of cellular metabolic process	85	0.349855	1.4787	0.0291333	0.328564	0.298166	74	tags=36%, list=27%, signal=39%	ENSG00000007908/ENSG00000169429/ENSG00000232810/ENSG00000006210/ENSG00000108691/ENSG00000115009/ENSG00000108342/ENSG00000169245/ENSG00000125538/ENSG00000162892/ENSG00000115008/ENSG00000136244/ENSG00000137462/ENSG00000028277/ENSG00000056558/ENSG00000151651/ENSG00000118503/ENSG00000075213/ENSG00000134070/ENSG00000163661/ENSG00000168961/ENSG00000125730/ENSG00000104856/ENSG00000090339/ENSG00000173432…
GO:0001525	angiogenesis	36	0.408283	1.54304	0.0291667	0.328564	0.298166	70	tags=42%, list=25%, signal=36%	ENSG00000169429/ENSG00000232810/ENSG00000006210/ENSG00000108691/ENSG00000169245/ENSG00000125538/ENSG00000115008/ENSG00000136244/ENSG00000185215/ENSG00000151651/ENSG00000118503/ENSG00000125730/ENSG00000163874/ENSG00000171236/ENSG00000064651
GO:0090311	regulation of protein deacetylation	2	-0.902174	-1.59481	0.029523	0.328564	0.298166	30	tags=100%, list=11%, signal=90%	ENSG00000073910
GO:1902533	positive regulation of intracellular signal transduction	45	0.384783	1.5216	0.0296221	0.328564	0.298166	69	tags=40%, list=25%, signal=36%	ENSG00000232810/ENSG00000006210/ENSG00000108691/ENSG00000115009/ENSG00000108342/ENSG00000125538/ENSG00000136244/ENSG00000137462/ENSG00000056558/ENSG00000151651/ENSG00000075213/ENSG00000134070/ENSG00000168961/ENSG00000090339/ENSG00000173432/ENSG00000163132/ENSG00000163874/ENSG00000138675
GO:0035635	entry of bacterium into host cell	1	0.98917	1.31283	0.0297165	0.328564	0.298166	4	tags=100%, list=1%, signal=99%	ENSG00000169429
GO:0050930	induction of positive chemotaxis	1	0.98917	1.31283	0.0297165	0.328564	0.298166	4	tags=100%, list=1%, signal=99%	ENSG00000169429
GO:0060354	negative regulation of cell adhesion molecule production	1	0.98917	1.31283	0.0297165	0.328564	0.298166	4	tags=100%, list=1%, signal=99%	ENSG00000169429
GO:2000535	regulation of entry of bacterium into host cell	1	0.98917	1.31283	0.0297165	0.328564	0.298166	4	tags=100%, list=1%, signal=99%	ENSG00000169429
GO:0032621	interleukin-18 production	2	0.858696	1.40603	0.0297641	0.328564	0.298166	41	tags=100%, list=15%, signal=86%	ENSG00000137462/ENSG00000154451
GO:1904062	regulation of cation transmembrane transport	11	0.553477	1.6026	0.0301568	0.328564	0.298166	39	tags=45%, list=14%, signal=41%	ENSG00000006210/ENSG00000108691/ENSG00000169245/ENSG00000169248/ENSG00000163131
GO:0032943	mononuclear cell proliferation	17	0.505455	1.65091	0.0301692	0.328564	0.298166	120	tags=82%, list=43%, signal=50%	ENSG00000162692/ENSG00000204482/ENSG00000125538/ENSG00000115008/ENSG00000136244/ENSG00000102524/ENSG00000168685/ENSG00000168961/ENSG00000184371/ENSG00000104312/ENSG00000146072/ENSG00000105639/ENSG00000110944/ENSG00000125347
GO:0032102	negative regulation of response to external stimulus	29	0.4319	1.56427	0.0305585	0.328564	0.298166	77	tags=48%, list=28%, signal=39%	ENSG00000123610/ENSG00000232810/ENSG00000006210/ENSG00000108691/ENSG00000135919/ENSG00000153993/ENSG00000118503/ENSG00000075213/ENSG00000168961/ENSG00000173432/ENSG00000163874/ENSG00000173334/ENSG00000064651/ENSG00000091879
GO:0008284	positive regulation of cell population proliferation	46	0.394145	1.56619	0.0306797	0.328564	0.298166	57	tags=35%, list=21%, signal=33%	ENSG00000232810/ENSG00000006210/ENSG00000162692/ENSG00000108342/ENSG00000169245/ENSG00000163735/ENSG00000125538/ENSG00000162892/ENSG00000115008/ENSG00000136244/ENSG00000058085/ENSG00000102524/ENSG00000118503/ENSG00000168685/ENSG00000226979/ENSG00000168961
GO:0001942	hair follicle development	3	0.799262	1.51183	0.0308582	0.328564	0.298166	10	tags=67%, list=4%, signal=65%	ENSG00000232810/ENSG00000134363
GO:0002712	regulation of B cell mediated immunity	3	0.8	1.51322	0.0308582	0.328564	0.298166	58	tags=100%, list=21%, signal=80%	ENSG00000232810/ENSG00000226979/ENSG00000125730
GO:0002714	positive regulation of B cell mediated immunity	3	0.8	1.51322	0.0308582	0.328564	0.298166	58	tags=100%, list=21%, signal=80%	ENSG00000232810/ENSG00000226979/ENSG00000125730
GO:0002861	regulation of inflammatory response to antigenic stimulus	3	0.8	1.51322	0.0308582	0.328564	0.298166	58	tags=100%, list=21%, signal=80%	ENSG00000232810/ENSG00000226979/ENSG00000125730
GO:0002863	positive regulation of inflammatory response to antigenic stimulus	3	0.8	1.51322	0.0308582	0.328564	0.298166	58	tags=100%, list=21%, signal=80%	ENSG00000232810/ENSG00000226979/ENSG00000125730
GO:0002889	regulation of immunoglobulin mediated immune response	3	0.8	1.51322	0.0308582	0.328564	0.298166	58	tags=100%, list=21%, signal=80%	ENSG00000232810/ENSG00000226979/ENSG00000125730
GO:0002891	positive regulation of immunoglobulin mediated immune response	3	0.8	1.51322	0.0308582	0.328564	0.298166	58	tags=100%, list=21%, signal=80%	ENSG00000232810/ENSG00000226979/ENSG00000125730
GO:0022404	molting cycle process	3	0.799262	1.51183	0.0308582	0.328564	0.298166	10	tags=67%, list=4%, signal=65%	ENSG00000232810/ENSG00000134363
GO:0022405	hair cycle process	3	0.799262	1.51183	0.0308582	0.328564	0.298166	10	tags=67%, list=4%, signal=65%	ENSG00000232810/ENSG00000134363
GO:0098773	skin epidermis development	3	0.799262	1.51183	0.0308582	0.328564	0.298166	10	tags=67%, list=4%, signal=65%	ENSG00000232810/ENSG00000134363
GO:0097623	potassium ion export across plasma membrane	1	-0.98917	-1.33376	0.0309269	0.328564	0.298166	5	tags=100%, list=2%, signal=99%
GO:0140115	export across plasma membrane	1	-0.98917	-1.33376	0.0309269	0.328564	0.298166	5	tags=100%, list=2%, signal=99%
GO:0007010	cytoskeleton organization	21	0.462616	1.58079	0.0313514	0.328564	0.298166	66	tags=43%, list=24%, signal=35%	ENSG00000232810/ENSG00000006210/ENSG00000108691/ENSG00000163739/ENSG00000108342/ENSG00000118503/ENSG00000067798/ENSG00000090339/ENSG00000096696
GO:0002252	immune effector process	60	0.371419	1.52176	0.0314083	0.328564	0.298166	68	tags=38%, list=24%, signal=37%	ENSG00000123610/ENSG00000232810/ENSG00000124875/ENSG00000163739/ENSG00000169245/ENSG00000125538/ENSG00000136244/ENSG00000137462/ENSG00000028277/ENSG00000163131/ENSG00000151651/ENSG00000166523/ENSG00000118503/ENSG00000168685/ENSG00000226979/ENSG00000163661/ENSG00000168961/ENSG00000125730/ENSG00000104856/ENSG00000090339/ENSG00000163874/ENSG00000096696/ENSG00000171236
GO:0002263	cell activation involved in immune response	32	0.42087	1.54215	0.0316122	0.328564	0.298166	68	tags=47%, list=24%, signal=40%	ENSG00000123610/ENSG00000163739/ENSG00000136244/ENSG00000137462/ENSG00000163131/ENSG00000151651/ENSG00000166523/ENSG00000163661/ENSG00000168961/ENSG00000125730/ENSG00000104856/ENSG00000090339/ENSG00000163874/ENSG00000096696/ENSG00000171236
GO:0002366	leukocyte activation involved in immune response	32	0.42087	1.54215	0.0316122	0.328564	0.298166	68	tags=47%, list=24%, signal=40%	ENSG00000123610/ENSG00000163739/ENSG00000136244/ENSG00000137462/ENSG00000163131/ENSG00000151651/ENSG00000166523/ENSG00000163661/ENSG00000168961/ENSG00000125730/ENSG00000104856/ENSG00000090339/ENSG00000163874/ENSG00000096696/ENSG00000171236
GO:0003006	developmental process involved in reproduction	23	0.458395	1.59904	0.0322234	0.328564	0.298166	91	tags=61%, list=33%, signal=45%	ENSG00000134363/ENSG00000125538/ENSG00000135919/ENSG00000115008/ENSG00000075213/ENSG00000163661/ENSG00000090339/ENSG00000122641/ENSG00000091879/ENSG00000113739/ENSG00000121858/ENSG00000184371/ENSG00000023445/ENSG00000112972
GO:0050796	regulation of insulin secretion	6	0.667947	1.60522	0.0322743	0.328564	0.298166	29	tags=50%, list=10%, signal=46%	ENSG00000232810/ENSG00000125538/ENSG00000136244
GO:0016192	vesicle-mediated transport	47	0.372985	1.48751	0.0324873	0.328564	0.298166	68	tags=36%, list=24%, signal=33%	ENSG00000007908/ENSG00000123610/ENSG00000169429/ENSG00000232810/ENSG00000108691/ENSG00000163739/ENSG00000125538/ENSG00000137462/ENSG00000163131/ENSG00000185215/ENSG00000151651/ENSG00000163661/ENSG00000168961/ENSG00000125730/ENSG00000173432/ENSG00000096696/ENSG00000171236
GO:0045732	positive regulation of protein catabolic process	9	0.585996	1.60379	0.0325815	0.328564	0.298166	71	tags=67%, list=26%, signal=51%	ENSG00000232810/ENSG00000125538/ENSG00000151651/ENSG00000118503/ENSG00000173334/ENSG00000138411
GO:1903708	positive regulation of hemopoiesis	19	0.469423	1.57788	0.0326797	0.328564	0.298166	114	tags=74%, list=41%, signal=47%	ENSG00000232810/ENSG00000108342/ENSG00000125538/ENSG00000115008/ENSG00000151651/ENSG00000168685/ENSG00000168961/ENSG00000173334/ENSG00000122641/ENSG00000184371/ENSG00000104312/ENSG00000144802/ENSG00000110944/ENSG00000134954
GO:0032270	positive regulation of cellular protein metabolic process	51	0.385712	1.55144	0.0328256	0.328564	0.298166	72	tags=41%, list=26%, signal=37%	ENSG00000232810/ENSG00000006210/ENSG00000108691/ENSG00000115009/ENSG00000108342/ENSG00000125538/ENSG00000162892/ENSG00000136244/ENSG00000056558/ENSG00000151651/ENSG00000118503/ENSG00000075213/ENSG00000134070/ENSG00000168961/ENSG00000125730/ENSG00000090339/ENSG00000173432/ENSG00000163874/ENSG00000173334/ENSG00000138675/ENSG00000122641
GO:0032946	positive regulation of mononuclear cell proliferation	11	0.567799	1.64407	0.0328258	0.328564	0.298166	113	tags=91%, list=41%, signal=56%	ENSG00000162692/ENSG00000125538/ENSG00000115008/ENSG00000136244/ENSG00000102524/ENSG00000168961/ENSG00000184371/ENSG00000104312/ENSG00000105639/ENSG00000110944
GO:0030036	actin cytoskeleton organization	15	0.501105	1.59036	0.0330296	0.328564	0.298166	16	tags=27%, list=6%, signal=27%	ENSG00000232810/ENSG00000006210/ENSG00000163739/ENSG00000108342
GO:0050776	regulation of immune response	38	0.40107	1.52942	0.033264	0.328564	0.298166	65	tags=42%, list=23%, signal=37%	ENSG00000232810/ENSG00000162692/ENSG00000125538/ENSG00000136244/ENSG00000154451/ENSG00000151651/ENSG00000102524/ENSG00000166523/ENSG00000118503/ENSG00000168685/ENSG00000226979/ENSG00000168961/ENSG00000125730/ENSG00000104856/ENSG00000090339/ENSG00000163874
GO:0007249	I-kappaB kinase/NF-kappaB signaling	21	0.458955	1.56828	0.0335135	0.328564	0.298166	65	tags=48%, list=23%, signal=39%	ENSG00000232810/ENSG00000006210/ENSG00000125538/ENSG00000137462/ENSG00000056558/ENSG00000118503/ENSG00000134070/ENSG00000168961/ENSG00000104856/ENSG00000163874
GO:0034764	positive regulation of transmembrane transport	11	0.564266	1.63384	0.0335513	0.328564	0.298166	58	tags=55%, list=21%, signal=45%	ENSG00000006210/ENSG00000108691/ENSG00000169245/ENSG00000169248/ENSG00000163131/ENSG00000125730
GO:0050729	positive regulation of inflammatory response	20	0.478097	1.62374	0.0336118	0.328564	0.298166	58	tags=45%, list=21%, signal=38%	ENSG00000232810/ENSG00000006210/ENSG00000125538/ENSG00000136244/ENSG00000137462/ENSG00000154451/ENSG00000151651/ENSG00000226979/ENSG00000125730
GO:0006576	cellular biogenic amine metabolic process	4	-0.667883	-1.57887	0.0336976	0.328564	0.298166	96	tags=100%, list=35%, signal=66%	ENSG00000130066/ENSG00000115758/ENSG00000189221
GO:0002286	T cell activation involved in immune response	11	0.550595	1.59425	0.0337756	0.328564	0.298166	113	tags=91%, list=41%, signal=56%	ENSG00000136244/ENSG00000166523/ENSG00000168961/ENSG00000104856/ENSG00000090339/ENSG00000163874/ENSG00000104312/ENSG00000144802/ENSG00000105639/ENSG00000110944
GO:1903169	regulation of calcium ion transmembrane transport	6	0.665923	1.60035	0.033878	0.328564	0.298166	26	tags=50%, list=9%, signal=46%	ENSG00000006210/ENSG00000169245/ENSG00000169248
GO:0010888	negative regulation of lipid storage	3	0.794391	1.50261	0.0341064	0.328564	0.298166	29	tags=67%, list=10%, signal=60%	ENSG00000232810/ENSG00000136244
GO:0051247	positive regulation of protein metabolic process	53	0.388399	1.56069	0.0341567	0.328564	0.298166	72	tags=42%, list=26%, signal=38%	ENSG00000232810/ENSG00000006210/ENSG00000108691/ENSG00000115009/ENSG00000108342/ENSG00000125538/ENSG00000162892/ENSG00000136244/ENSG00000056558/ENSG00000151651/ENSG00000118503/ENSG00000075213/ENSG00000134070/ENSG00000168961/ENSG00000125730/ENSG00000090339/ENSG00000173432/ENSG00000163874/ENSG00000173334/ENSG00000138675/ENSG00000138411/ENSG00000122641
GO:0002696	positive regulation of leukocyte activation	20	0.476618	1.61871	0.0342645	0.328564	0.298166	57	tags=45%, list=21%, signal=39%	ENSG00000162692/ENSG00000108691/ENSG00000125538/ENSG00000115008/ENSG00000136244/ENSG00000151651/ENSG00000102524/ENSG00000168685/ENSG00000168961
GO:0050867	positive regulation of cell activation	20	0.476618	1.61871	0.0342645	0.328564	0.298166	57	tags=45%, list=21%, signal=39%	ENSG00000162692/ENSG00000108691/ENSG00000125538/ENSG00000115008/ENSG00000136244/ENSG00000151651/ENSG00000102524/ENSG00000168685/ENSG00000168961
GO:0070997	neuron death	13	0.538861	1.65095	0.0345882	0.328564	0.298166	50	tags=46%, list=18%, signal=40%	ENSG00000232810/ENSG00000006210/ENSG00000108691/ENSG00000108342/ENSG00000151651/ENSG00000112096
GO:1904019	epithelial cell apoptotic process	8	0.615556	1.63843	0.0346952	0.328564	0.298166	60	tags=62%, list=22%, signal=50%	ENSG00000232810/ENSG00000108691/ENSG00000136244/ENSG00000118503/ENSG00000090339
GO:0016051	carbohydrate biosynthetic process	3	-0.76	-1.57991	0.0347679	0.328564	0.298166	70	tags=100%, list=25%, signal=76%	ENSG00000086062/ENSG00000169047
GO:0045913	positive regulation of carbohydrate metabolic process	3	-0.76	-1.57991	0.0347679	0.328564	0.298166	70	tags=100%, list=25%, signal=76%	ENSG00000089041/ENSG00000169047
GO:0002534	cytokine production involved in inflammatory response	5	0.694176	1.57648	0.0348675	0.328564	0.298166	65	tags=80%, list=23%, signal=62%	ENSG00000232810/ENSG00000136244/ENSG00000154451/ENSG00000163874
GO:0033138	positive regulation of peptidyl-serine phosphorylation	5	0.69181	1.57111	0.0348675	0.328564	0.298166	29	tags=60%, list=10%, signal=55%	ENSG00000232810/ENSG00000108342/ENSG00000136244
GO:1900015	regulation of cytokine production involved in inflammatory response	5	0.694176	1.57648	0.0348675	0.328564	0.298166	65	tags=80%, list=23%, signal=62%	ENSG00000232810/ENSG00000136244/ENSG00000154451/ENSG00000163874
GO:0045597	positive regulation of cell differentiation	41	0.389444	1.51556	0.0349435	0.328564	0.298166	72	tags=41%, list=26%, signal=36%	ENSG00000232810/ENSG00000006210/ENSG00000108342/ENSG00000125538/ENSG00000135919/ENSG00000115008/ENSG00000136244/ENSG00000137462/ENSG00000151651/ENSG00000168685/ENSG00000112096/ENSG00000075213/ENSG00000226979/ENSG00000168961/ENSG00000163874/ENSG00000173334/ENSG00000122641
GO:0000165	MAPK cascade	42	0.387514	1.50915	0.0349794	0.328564	0.298166	69	tags=40%, list=25%, signal=36%	ENSG00000232810/ENSG00000006210/ENSG00000108691/ENSG00000115009/ENSG00000125538/ENSG00000136244/ENSG00000056558/ENSG00000151651/ENSG00000075213/ENSG00000134070/ENSG00000168961/ENSG00000090339/ENSG00000173432/ENSG00000120875/ENSG00000163874/ENSG00000173334/ENSG00000138675
GO:0023014	signal transduction by protein phosphorylation	42	0.387514	1.50915	0.0349794	0.328564	0.298166	69	tags=40%, list=25%, signal=36%	ENSG00000232810/ENSG00000006210/ENSG00000108691/ENSG00000115009/ENSG00000125538/ENSG00000136244/ENSG00000056558/ENSG00000151651/ENSG00000075213/ENSG00000134070/ENSG00000168961/ENSG00000090339/ENSG00000173432/ENSG00000120875/ENSG00000163874/ENSG00000173334/ENSG00000138675
GO:0002708	positive regulation of lymphocyte mediated immunity	8	0.602467	1.6036	0.035309	0.328564	0.298166	58	tags=62%, list=21%, signal=51%	ENSG00000232810/ENSG00000125538/ENSG00000136244/ENSG00000226979/ENSG00000125730
GO:0050670	regulation of lymphocyte proliferation	14	0.520725	1.62316	0.0357753	0.328564	0.298166	120	tags=86%, list=43%, signal=51%	ENSG00000162692/ENSG00000204482/ENSG00000125538/ENSG00000115008/ENSG00000136244/ENSG00000102524/ENSG00000168961/ENSG00000104312/ENSG00000146072/ENSG00000105639/ENSG00000110944/ENSG00000125347
GO:0002821	positive regulation of adaptive immune response	11	0.561674	1.62633	0.0360903	0.328564	0.298166	116	tags=91%, list=42%, signal=55%	ENSG00000232810/ENSG00000125538/ENSG00000136244/ENSG00000102524/ENSG00000226979/ENSG00000125730/ENSG00000104312/ENSG00000144802/ENSG00000110944/ENSG00000204642
GO:0002824	positive regulation of adaptive immune response based on somatic recombination of immune receptors built from immunoglobulin superfamily domains	11	0.561674	1.62633	0.0360903	0.328564	0.298166	116	tags=91%, list=42%, signal=55%	ENSG00000232810/ENSG00000125538/ENSG00000136244/ENSG00000102524/ENSG00000226979/ENSG00000125730/ENSG00000104312/ENSG00000144802/ENSG00000110944/ENSG00000204642
GO:2000403	positive regulation of lymphocyte migration	4	0.74707	1.55287	0.0362845	0.328564	0.298166	43	tags=75%, list=15%, signal=64%	ENSG00000115009/ENSG00000169245/ENSG00000151651
GO:2000404	regulation of T cell migration	4	0.74707	1.55287	0.0362845	0.328564	0.298166	43	tags=75%, list=15%, signal=64%	ENSG00000115009/ENSG00000169245/ENSG00000151651
GO:2000406	positive regulation of T cell migration	4	0.74707	1.55287	0.0362845	0.328564	0.298166	43	tags=75%, list=15%, signal=64%	ENSG00000115009/ENSG00000169245/ENSG00000151651
GO:0046209	nitric oxide metabolic process	10	0.561279	1.58467	0.0363196	0.328564	0.298166	65	tags=60%, list=23%, signal=48%	ENSG00000232810/ENSG00000125538/ENSG00000137462/ENSG00000163661/ENSG00000090339/ENSG00000163874
GO:2001057	reactive nitrogen species metabolic process	10	0.561279	1.58467	0.0363196	0.328564	0.298166	65	tags=60%, list=23%, signal=48%	ENSG00000232810/ENSG00000125538/ENSG00000137462/ENSG00000163661/ENSG00000090339/ENSG00000163874
GO:0002691	regulation of cellular extravasation	3	0.792727	1.49947	0.0364265	0.328564	0.298166	60	tags=100%, list=22%, signal=79%	ENSG00000007908/ENSG00000151651/ENSG00000090339
GO:0002693	positive regulation of cellular extravasation	3	0.792727	1.49947	0.0364265	0.328564	0.298166	60	tags=100%, list=22%, signal=79%	ENSG00000007908/ENSG00000151651/ENSG00000090339
GO:0032271	regulation of protein polymerization	3	0.792727	1.49947	0.0364265	0.328564	0.298166	60	tags=100%, list=22%, signal=79%	ENSG00000108342/ENSG00000067798/ENSG00000090339
GO:0032273	positive regulation of protein polymerization	3	0.792727	1.49947	0.0364265	0.328564	0.298166	60	tags=100%, list=22%, signal=79%	ENSG00000108342/ENSG00000067798/ENSG00000090339
GO:0048585	negative regulation of response to stimulus	65	0.352267	1.45465	0.0365482	0.328564	0.298166	70	tags=35%, list=25%, signal=35%	ENSG00000123610/ENSG00000169429/ENSG00000232810/ENSG00000006210/ENSG00000108691/ENSG00000134363/ENSG00000136689/ENSG00000125538/ENSG00000135919/ENSG00000115008/ENSG00000136244/ENSG00000153993/ENSG00000118503/ENSG00000168685/ENSG00000112096/ENSG00000075213/ENSG00000168961/ENSG00000090339/ENSG00000173432/ENSG00000120875/ENSG00000163874/ENSG00000173334/ENSG00000064651
GO:0072359	circulatory system development	47	0.370112	1.47605	0.0365482	0.328564	0.298166	70	tags=38%, list=25%, signal=34%	ENSG00000169429/ENSG00000232810/ENSG00000006210/ENSG00000108691/ENSG00000169245/ENSG00000125538/ENSG00000115008/ENSG00000136244/ENSG00000185215/ENSG00000151651/ENSG00000118503/ENSG00000112096/ENSG00000125730/ENSG00000163132/ENSG00000163874/ENSG00000096696/ENSG00000171236/ENSG00000064651
GO:1902531	regulation of intracellular signal transduction	61	0.362603	1.48592	0.0374115	0.328564	0.298166	69	tags=38%, list=25%, signal=36%	ENSG00000232810/ENSG00000006210/ENSG00000108691/ENSG00000115009/ENSG00000108342/ENSG00000125538/ENSG00000135919/ENSG00000136244/ENSG00000137462/ENSG00000056558/ENSG00000151651/ENSG00000118503/ENSG00000112096/ENSG00000075213/ENSG00000134070/ENSG00000168961/ENSG00000090339/ENSG00000173432/ENSG00000163132/ENSG00000120875/ENSG00000163874/ENSG00000173334/ENSG00000138675
GO:0051223	regulation of protein transport	20	0.471362	1.60086	0.0375276	0.328564	0.298166	70	tags=50%, list=25%, signal=40%	ENSG00000232810/ENSG00000125538/ENSG00000115008/ENSG00000136244/ENSG00000137462/ENSG00000151651/ENSG00000166523/ENSG00000173432/ENSG00000163874/ENSG00000064651
GO:0070201	regulation of establishment of protein localization	20	0.471362	1.60086	0.0375276	0.328564	0.298166	70	tags=50%, list=25%, signal=40%	ENSG00000232810/ENSG00000125538/ENSG00000115008/ENSG00000136244/ENSG00000137462/ENSG00000151651/ENSG00000166523/ENSG00000173432/ENSG00000163874/ENSG00000064651
GO:1903555	regulation of tumor necrosis factor superfamily cytokine production	9	0.581824	1.59237	0.037594	0.328564	0.298166	65	tags=67%, list=23%, signal=53%	ENSG00000006210/ENSG00000137462/ENSG00000151651/ENSG00000118503/ENSG00000168961/ENSG00000163874
GO:1903725	regulation of phospholipid metabolic process	3	-0.752727	-1.5648	0.0377179	0.328564	0.298166	72	tags=100%, list=26%, signal=75%	ENSG00000130164/ENSG00000169047
GO:0002287	alpha-beta T cell activation involved in immune response	8	0.611111	1.62661	0.0377287	0.328564	0.298166	113	tags=100%, list=41%, signal=61%	ENSG00000136244/ENSG00000168961/ENSG00000104856/ENSG00000163874/ENSG00000104312/ENSG00000144802/ENSG00000105639/ENSG00000110944
GO:0002293	alpha-beta T cell differentiation involved in immune response	8	0.611111	1.62661	0.0377287	0.328564	0.298166	113	tags=100%, list=41%, signal=61%	ENSG00000136244/ENSG00000168961/ENSG00000104856/ENSG00000163874/ENSG00000104312/ENSG00000144802/ENSG00000105639/ENSG00000110944
GO:0002294	CD4-positive, alpha-beta T cell differentiation involved in immune response	8	0.611111	1.62661	0.0377287	0.328564	0.298166	113	tags=100%, list=41%, signal=61%	ENSG00000136244/ENSG00000168961/ENSG00000104856/ENSG00000163874/ENSG00000104312/ENSG00000144802/ENSG00000105639/ENSG00000110944
GO:0035710	CD4-positive, alpha-beta T cell activation	8	0.611111	1.62661	0.0377287	0.328564	0.298166	113	tags=100%, list=41%, signal=61%	ENSG00000136244/ENSG00000168961/ENSG00000104856/ENSG00000163874/ENSG00000104312/ENSG00000144802/ENSG00000105639/ENSG00000110944
GO:0043367	CD4-positive, alpha-beta T cell differentiation	8	0.611111	1.62661	0.0377287	0.328564	0.298166	113	tags=100%, list=41%, signal=61%	ENSG00000136244/ENSG00000168961/ENSG00000104856/ENSG00000163874/ENSG00000104312/ENSG00000144802/ENSG00000105639/ENSG00000110944
GO:0034330	cell junction organization	19	0.480563	1.61533	0.0378547	0.328564	0.298166	66	tags=47%, list=24%, signal=39%	ENSG00000232810/ENSG00000006210/ENSG00000125538/ENSG00000159261/ENSG00000137462/ENSG00000058085/ENSG00000196878/ENSG00000125730/ENSG00000096696
GO:0045619	regulation of lymphocyte differentiation	14	0.516665	1.6105	0.0378593	0.328564	0.298166	120	tags=86%, list=43%, signal=51%	ENSG00000125538/ENSG00000115008/ENSG00000151651/ENSG00000168685/ENSG00000168961/ENSG00000163874/ENSG00000122641/ENSG00000104312/ENSG00000144802/ENSG00000105639/ENSG00000110944/ENSG00000125347
GO:0010638	positive regulation of organelle organization	18	0.472427	1.57066	0.0382514	0.328564	0.298166	62	tags=44%, list=22%, signal=37%	ENSG00000232810/ENSG00000006210/ENSG00000108342/ENSG00000125538/ENSG00000115008/ENSG00000067798/ENSG00000090339/ENSG00000163132
GO:0071900	regulation of protein serine/threonine kinase activity	18	0.472655	1.57142	0.0382514	0.328564	0.298166	67	tags=50%, list=24%, signal=41%	ENSG00000232810/ENSG00000169245/ENSG00000125538/ENSG00000151651/ENSG00000118503/ENSG00000134070/ENSG00000173432/ENSG00000120875/ENSG00000173334
GO:0016338	calcium-independent cell-cell adhesion via plasma membrane cell-adhesion molecules	3	0.783722	1.48243	0.0385802	0.328564	0.298166	22	tags=67%, list=8%, signal=62%	ENSG00000006210/ENSG00000159261
GO:0031650	regulation of heat generation	3	0.783792	1.48257	0.0385802	0.328564	0.298166	20	tags=67%, list=7%, signal=63%	ENSG00000232810/ENSG00000125538
GO:0031652	positive regulation of heat generation	3	0.783792	1.48257	0.0385802	0.328564	0.298166	20	tags=67%, list=7%, signal=63%	ENSG00000232810/ENSG00000125538
GO:0032768	regulation of monooxygenase activity	6	0.65536	1.57497	0.0386667	0.328564	0.298166	27	tags=50%, list=10%, signal=46%	ENSG00000232810/ENSG00000125538/ENSG00000115008
GO:0045216	cell-cell junction organization	6	0.654697	1.57338	0.0386667	0.328564	0.298166	22	tags=50%, list=8%, signal=47%	ENSG00000232810/ENSG00000125538/ENSG00000159261
GO:0051341	regulation of oxidoreductase activity	6	0.65536	1.57497	0.0386667	0.328564	0.298166	27	tags=50%, list=10%, signal=46%	ENSG00000232810/ENSG00000125538/ENSG00000115008
GO:0060759	regulation of response to cytokine stimulus	15	0.492465	1.56294	0.0387244	0.328564	0.298166	55	tags=47%, list=20%, signal=40%	ENSG00000232810/ENSG00000136689/ENSG00000136244/ENSG00000137462/ENSG00000056558/ENSG00000118503/ENSG00000134070
GO:1903978	regulation of microglial cell activation	3	0.78827	1.49104	0.0387466	0.328564	0.298166	29	tags=67%, list=10%, signal=60%	ENSG00000006210/ENSG00000136244
GO:0019222	regulation of metabolic process	148	0.325014	1.41902	0.039039	0.328564	0.298166	74	tags=32%, list=27%, signal=51%	ENSG00000007908/ENSG00000227507/ENSG00000169429/ENSG00000232810/ENSG00000006210/ENSG00000124875/ENSG00000108691/ENSG00000134363/ENSG00000115009/ENSG00000108342/ENSG00000169245/ENSG00000125538/ENSG00000162892/ENSG00000135919/ENSG00000115008/ENSG00000123689/ENSG00000136244/ENSG00000105825/ENSG00000211448/ENSG00000137462/ENSG00000028277/ENSG00000056558/ENSG00000154451/ENSG00000151651/ENSG00000166523…
GO:0010817	regulation of hormone levels	14	0.497257	1.55	0.0390805	0.328564	0.298166	32	tags=36%, list=12%, signal=33%	ENSG00000232810/ENSG00000136689/ENSG00000125538/ENSG00000136244/ENSG00000211448
GO:0050707	regulation of cytokine secretion	8	0.598078	1.59191	0.0390921	0.328564	0.298166	61	tags=62%, list=22%, signal=50%	ENSG00000232810/ENSG00000115008/ENSG00000137462/ENSG00000166523/ENSG00000173432
GO:0070663	regulation of leukocyte proliferation	18	0.470297	1.56357	0.0393443	0.328564	0.298166	120	tags=78%, list=43%, signal=47%	ENSG00000162692/ENSG00000204482/ENSG00000125538/ENSG00000115008/ENSG00000136244/ENSG00000102524/ENSG00000118503/ENSG00000168961/ENSG00000184371/ENSG00000104312/ENSG00000146072/ENSG00000105639/ENSG00000110944/ENSG00000125347
GO:0050790	regulation of catalytic activity	59	0.359383	1.46948	0.0394737	0.328564	0.298166	67	tags=36%, list=24%, signal=34%	ENSG00000007908/ENSG00000232810/ENSG00000006210/ENSG00000108691/ENSG00000115009/ENSG00000163739/ENSG00000169245/ENSG00000125538/ENSG00000135919/ENSG00000115008/ENSG00000105825/ENSG00000151651/ENSG00000118503/ENSG00000134070/ENSG00000163661/ENSG00000168961/ENSG00000125730/ENSG00000090339/ENSG00000173432/ENSG00000120875/ENSG00000173334
GO:0000185	activation of MAPKKK activity	1	0.98556	1.30804	0.0397197	0.328564	0.298166	5	tags=100%, list=2%, signal=99%	ENSG00000232810
GO:0002941	synoviocyte proliferation	1	0.98556	1.30804	0.0397197	0.328564	0.298166	5	tags=100%, list=2%, signal=99%	ENSG00000232810
GO:0006447	regulation of translational initiation by iron	1	0.98556	1.30804	0.0397197	0.328564	0.298166	5	tags=100%, list=2%, signal=99%	ENSG00000232810
GO:0010693	negative regulation of alkaline phosphatase activity	1	0.98556	1.30804	0.0397197	0.328564	0.298166	5	tags=100%, list=2%, signal=99%	ENSG00000232810
GO:0010923	negative regulation of phosphatase activity	1	0.98556	1.30804	0.0397197	0.328564	0.298166	5	tags=100%, list=2%, signal=99%	ENSG00000232810
GO:0030865	cortical cytoskeleton organization	1	0.98556	1.30804	0.0397197	0.328564	0.298166	5	tags=100%, list=2%, signal=99%	ENSG00000232810
GO:0030866	cortical actin cytoskeleton organization	1	0.98556	1.30804	0.0397197	0.328564	0.298166	5	tags=100%, list=2%, signal=99%	ENSG00000232810
GO:0032515	negative regulation of phosphoprotein phosphatase activity	1	0.98556	1.30804	0.0397197	0.328564	0.298166	5	tags=100%, list=2%, signal=99%	ENSG00000232810
GO:0032603	fractalkine production	1	0.98556	1.30804	0.0397197	0.328564	0.298166	5	tags=100%, list=2%, signal=99%	ENSG00000232810
GO:0032800	receptor biosynthetic process	1	0.98556	1.30804	0.0397197	0.328564	0.298166	5	tags=100%, list=2%, signal=99%	ENSG00000232810
GO:0033173	calcineurin-NFAT signaling cascade	1	0.98556	1.30804	0.0397197	0.328564	0.298166	5	tags=100%, list=2%, signal=99%	ENSG00000232810
GO:0034205	amyloid-beta formation	1	0.98556	1.30804	0.0397197	0.328564	0.298166	5	tags=100%, list=2%, signal=99%	ENSG00000232810
GO:0034394	protein localization to cell surface	1	0.98556	1.30804	0.0397197	0.328564	0.298166	5	tags=100%, list=2%, signal=99%	ENSG00000232810
GO:0035304	regulation of protein dephosphorylation	1	0.98556	1.30804	0.0397197	0.328564	0.298166	5	tags=100%, list=2%, signal=99%	ENSG00000232810
GO:0035305	negative regulation of dephosphorylation	1	0.98556	1.30804	0.0397197	0.328564	0.298166	5	tags=100%, list=2%, signal=99%	ENSG00000232810
GO:0035308	negative regulation of protein dephosphorylation	1	0.98556	1.30804	0.0397197	0.328564	0.298166	5	tags=100%, list=2%, signal=99%	ENSG00000232810
GO:0035507	regulation of myosin-light-chain-phosphatase activity	1	0.98556	1.30804	0.0397197	0.328564	0.298166	5	tags=100%, list=2%, signal=99%	ENSG00000232810
GO:0035509	negative regulation of myosin-light-chain-phosphatase activity	1	0.98556	1.30804	0.0397197	0.328564	0.298166	5	tags=100%, list=2%, signal=99%	ENSG00000232810
GO:0043243	positive regulation of protein-containing complex disassembly	1	0.98556	1.30804	0.0397197	0.328564	0.298166	5	tags=100%, list=2%, signal=99%	ENSG00000232810
GO:0043666	regulation of phosphoprotein phosphatase activity	1	0.98556	1.30804	0.0397197	0.328564	0.298166	5	tags=100%, list=2%, signal=99%	ENSG00000232810
GO:0045994	positive regulation of translational initiation by iron	1	0.98556	1.30804	0.0397197	0.328564	0.298166	5	tags=100%, list=2%, signal=99%	ENSG00000232810
GO:0048016	inositol phosphate-mediated signaling	1	0.98556	1.30804	0.0397197	0.328564	0.298166	5	tags=100%, list=2%, signal=99%	ENSG00000232810
GO:0050435	amyloid-beta metabolic process	1	0.98556	1.30804	0.0397197	0.328564	0.298166	5	tags=100%, list=2%, signal=99%	ENSG00000232810
GO:0050850	positive regulation of calcium-mediated signaling	1	0.98556	1.30804	0.0397197	0.328564	0.298166	5	tags=100%, list=2%, signal=99%	ENSG00000232810
GO:0061046	regulation of branching involved in lung morphogenesis	1	0.98556	1.30804	0.0397197	0.328564	0.298166	5	tags=100%, list=2%, signal=99%	ENSG00000232810
GO:0061048	negative regulation of branching involved in lung morphogenesis	1	0.98556	1.30804	0.0397197	0.328564	0.298166	5	tags=100%, list=2%, signal=99%	ENSG00000232810
GO:0061757	leukocyte adhesion to arterial endothelial cell	1	0.98556	1.30804	0.0397197	0.328564	0.298166	5	tags=100%, list=2%, signal=99%	ENSG00000232810
GO:0070884	regulation of calcineurin-NFAT signaling cascade	1	0.98556	1.30804	0.0397197	0.328564	0.298166	5	tags=100%, list=2%, signal=99%	ENSG00000232810
GO:0070886	positive regulation of calcineurin-NFAT signaling cascade	1	0.98556	1.30804	0.0397197	0.328564	0.298166	5	tags=100%, list=2%, signal=99%	ENSG00000232810
GO:0071550	death-inducing signaling complex assembly	1	0.98556	1.30804	0.0397197	0.328564	0.298166	5	tags=100%, list=2%, signal=99%	ENSG00000232810
GO:0071800	podosome assembly	1	0.98556	1.30804	0.0397197	0.328564	0.298166	5	tags=100%, list=2%, signal=99%	ENSG00000232810
GO:0071801	regulation of podosome assembly	1	0.98556	1.30804	0.0397197	0.328564	0.298166	5	tags=100%, list=2%, signal=99%	ENSG00000232810
GO:0071803	positive regulation of podosome assembly	1	0.98556	1.30804	0.0397197	0.328564	0.298166	5	tags=100%, list=2%, signal=99%	ENSG00000232810
GO:0072564	blood microparticle formation	1	0.98556	1.30804	0.0397197	0.328564	0.298166	5	tags=100%, list=2%, signal=99%	ENSG00000232810
GO:0072567	chemokine (C-X-C motif) ligand 2 production	1	0.98556	1.30804	0.0397197	0.328564	0.298166	5	tags=100%, list=2%, signal=99%	ENSG00000232810
GO:0090153	regulation of sphingolipid biosynthetic process	1	0.98556	1.30804	0.0397197	0.328564	0.298166	5	tags=100%, list=2%, signal=99%	ENSG00000232810
GO:0090154	positive regulation of sphingolipid biosynthetic process	1	0.98556	1.30804	0.0397197	0.328564	0.298166	5	tags=100%, list=2%, signal=99%	ENSG00000232810
GO:0097527	necroptotic signaling pathway	1	0.98556	1.30804	0.0397197	0.328564	0.298166	5	tags=100%, list=2%, signal=99%	ENSG00000232810
GO:0097720	calcineurin-mediated signaling	1	0.98556	1.30804	0.0397197	0.328564	0.298166	5	tags=100%, list=2%, signal=99%	ENSG00000232810
GO:0106056	regulation of calcineurin-mediated signaling	1	0.98556	1.30804	0.0397197	0.328564	0.298166	5	tags=100%, list=2%, signal=99%	ENSG00000232810
GO:0106058	positive regulation of calcineurin-mediated signaling	1	0.98556	1.30804	0.0397197	0.328564	0.298166	5	tags=100%, list=2%, signal=99%	ENSG00000232810
GO:1900221	regulation of amyloid-beta clearance	1	0.98556	1.30804	0.0397197	0.328564	0.298166	5	tags=100%, list=2%, signal=99%	ENSG00000232810
GO:1900222	negative regulation of amyloid-beta clearance	1	0.98556	1.30804	0.0397197	0.328564	0.298166	5	tags=100%, list=2%, signal=99%	ENSG00000232810
GO:1900409	positive regulation of cellular response to oxidative stress	1	0.98556	1.30804	0.0397197	0.328564	0.298166	5	tags=100%, list=2%, signal=99%	ENSG00000232810
GO:1901033	positive regulation of response to reactive oxygen species	1	0.98556	1.30804	0.0397197	0.328564	0.298166	5	tags=100%, list=2%, signal=99%	ENSG00000232810
GO:1901645	regulation of synoviocyte proliferation	1	0.98556	1.30804	0.0397197	0.328564	0.298166	5	tags=100%, list=2%, signal=99%	ENSG00000232810
GO:1901647	positive regulation of synoviocyte proliferation	1	0.98556	1.30804	0.0397197	0.328564	0.298166	5	tags=100%, list=2%, signal=99%	ENSG00000232810
GO:1901668	regulation of superoxide dismutase activity	1	0.98556	1.30804	0.0397197	0.328564	0.298166	5	tags=100%, list=2%, signal=99%	ENSG00000232810
GO:1901671	positive regulation of superoxide dismutase activity	1	0.98556	1.30804	0.0397197	0.328564	0.298166	5	tags=100%, list=2%, signal=99%	ENSG00000232810
GO:1902003	regulation of amyloid-beta formation	1	0.98556	1.30804	0.0397197	0.328564	0.298166	5	tags=100%, list=2%, signal=99%	ENSG00000232810
GO:1902004	positive regulation of amyloid-beta formation	1	0.98556	1.30804	0.0397197	0.328564	0.298166	5	tags=100%, list=2%, signal=99%	ENSG00000232810
GO:1902117	positive regulation of organelle assembly	1	0.98556	1.30804	0.0397197	0.328564	0.298166	5	tags=100%, list=2%, signal=99%	ENSG00000232810
GO:1902884	positive regulation of response to oxidative stress	1	0.98556	1.30804	0.0397197	0.328564	0.298166	5	tags=100%, list=2%, signal=99%	ENSG00000232810
GO:1903078	positive regulation of protein localization to plasma membrane	1	0.98556	1.30804	0.0397197	0.328564	0.298166	5	tags=100%, list=2%, signal=99%	ENSG00000232810
GO:1903347	negative regulation of bicellular tight junction assembly	1	0.98556	1.30804	0.0397197	0.328564	0.298166	5	tags=100%, list=2%, signal=99%	ENSG00000232810
GO:1904377	positive regulation of protein localization to cell periphery	1	0.98556	1.30804	0.0397197	0.328564	0.298166	5	tags=100%, list=2%, signal=99%	ENSG00000232810
GO:1904833	positive regulation of removal of superoxide radicals	1	0.98556	1.30804	0.0397197	0.328564	0.298166	5	tags=100%, list=2%, signal=99%	ENSG00000232810
GO:1904997	regulation of leukocyte adhesion to arterial endothelial cell	1	0.98556	1.30804	0.0397197	0.328564	0.298166	5	tags=100%, list=2%, signal=99%	ENSG00000232810
GO:1904999	positive regulation of leukocyte adhesion to arterial endothelial cell	1	0.98556	1.30804	0.0397197	0.328564	0.298166	5	tags=100%, list=2%, signal=99%	ENSG00000232810
GO:1905038	regulation of membrane lipid metabolic process	1	0.98556	1.30804	0.0397197	0.328564	0.298166	5	tags=100%, list=2%, signal=99%	ENSG00000232810
GO:2000008	regulation of protein localization to cell surface	1	0.98556	1.30804	0.0397197	0.328564	0.298166	5	tags=100%, list=2%, signal=99%	ENSG00000232810
GO:2000010	positive regulation of protein localization to cell surface	1	0.98556	1.30804	0.0397197	0.328564	0.298166	5	tags=100%, list=2%, signal=99%	ENSG00000232810
GO:2000303	regulation of ceramide biosynthetic process	1	0.98556	1.30804	0.0397197	0.328564	0.298166	5	tags=100%, list=2%, signal=99%	ENSG00000232810
GO:2000304	positive regulation of ceramide biosynthetic process	1	0.98556	1.30804	0.0397197	0.328564	0.298166	5	tags=100%, list=2%, signal=99%	ENSG00000232810
GO:2000332	regulation of blood microparticle formation	1	0.98556	1.30804	0.0397197	0.328564	0.298166	5	tags=100%, list=2%, signal=99%	ENSG00000232810
GO:2000334	positive regulation of blood microparticle formation	1	0.98556	1.30804	0.0397197	0.328564	0.298166	5	tags=100%, list=2%, signal=99%	ENSG00000232810
GO:2000341	regulation of chemokine (C-X-C motif) ligand 2 production	1	0.98556	1.30804	0.0397197	0.328564	0.298166	5	tags=100%, list=2%, signal=99%	ENSG00000232810
GO:2000343	positive regulation of chemokine (C-X-C motif) ligand 2 production	1	0.98556	1.30804	0.0397197	0.328564	0.298166	5	tags=100%, list=2%, signal=99%	ENSG00000232810
GO:0034329	cell junction assembly	14	0.516173	1.60897	0.0399432	0.328564	0.298166	47	tags=43%, list=17%, signal=37%	ENSG00000232810/ENSG00000125538/ENSG00000159261/ENSG00000137462/ENSG00000058085/ENSG00000196878
GO:0042509	regulation of tyrosine phosphorylation of STAT protein	6	0.651031	1.56457	0.04	0.328564	0.298166	29	tags=50%, list=10%, signal=46%	ENSG00000232810/ENSG00000162892/ENSG00000136244
GO:0042531	positive regulation of tyrosine phosphorylation of STAT protein	6	0.651031	1.56457	0.04	0.328564	0.298166	29	tags=50%, list=10%, signal=46%	ENSG00000232810/ENSG00000162892/ENSG00000136244
GO:0046330	positive regulation of JNK cascade	6	0.650006	1.5621	0.04	0.328564	0.298166	51	tags=67%, list=18%, signal=56%	ENSG00000232810/ENSG00000125538/ENSG00000056558/ENSG00000075213
GO:0046427	positive regulation of receptor signaling pathway via JAK-STAT	6	0.651031	1.56457	0.04	0.328564	0.298166	29	tags=50%, list=10%, signal=46%	ENSG00000232810/ENSG00000162892/ENSG00000136244
GO:0043933	protein-containing complex subunit organization	25	0.437455	1.53077	0.0401302	0.328564	0.298166	65	tags=44%, list=23%, signal=37%	ENSG00000232810/ENSG00000006210/ENSG00000108342/ENSG00000159261/ENSG00000056558/ENSG00000154451/ENSG00000101670/ENSG00000112096/ENSG00000067798/ENSG00000090339/ENSG00000163874
GO:0001959	regulation of cytokine-mediated signaling pathway	12	0.526895	1.55689	0.0402844	0.328564	0.298166	101	tags=75%, list=36%, signal=50%	ENSG00000232810/ENSG00000136689/ENSG00000136244/ENSG00000056558/ENSG00000118503/ENSG00000134070/ENSG00000184371/ENSG00000023445/ENSG00000104312
GO:0051336	regulation of hydrolase activity	28	0.429686	1.53892	0.0402969	0.328564	0.298166	105	tags=61%, list=38%, signal=42%	ENSG00000007908/ENSG00000232810/ENSG00000006210/ENSG00000108691/ENSG00000115009/ENSG00000135919/ENSG00000105825/ENSG00000163661/ENSG00000168961/ENSG00000125730/ENSG00000090339/ENSG00000121858/ENSG00000023445/ENSG00000048052/ENSG00000026508/ENSG00000104312/ENSG00000078081
GO:0010829	negative regulation of glucose transmembrane transport	3	0.784803	1.48448	0.0406027	0.328564	0.298166	20	tags=67%, list=7%, signal=63%	ENSG00000232810/ENSG00000125538
GO:0043297	apical junction assembly	3	0.784861	1.48459	0.0406027	0.328564	0.298166	22	tags=67%, list=8%, signal=62%	ENSG00000232810/ENSG00000159261
GO:0051785	positive regulation of nuclear division	3	0.785455	1.48571	0.0406027	0.328564	0.298166	62	tags=100%, list=22%, signal=79%	ENSG00000125538/ENSG00000115008/ENSG00000163132
GO:0070830	bicellular tight junction assembly	3	0.784861	1.48459	0.0406027	0.328564	0.298166	22	tags=67%, list=8%, signal=62%	ENSG00000232810/ENSG00000159261
GO:0120192	tight junction assembly	3	0.784861	1.48459	0.0406027	0.328564	0.298166	22	tags=67%, list=8%, signal=62%	ENSG00000232810/ENSG00000159261
GO:0120193	tight junction organization	3	0.784861	1.48459	0.0406027	0.328564	0.298166	22	tags=67%, list=8%, signal=62%	ENSG00000232810/ENSG00000159261
GO:0032874	positive regulation of stress-activated MAPK cascade	7	0.620674	1.58063	0.0411311	0.328564	0.298166	65	tags=71%, list=23%, signal=56%	ENSG00000232810/ENSG00000125538/ENSG00000056558/ENSG00000075213/ENSG00000163874
GO:1904894	positive regulation of receptor signaling pathway via STAT	7	0.61704	1.57138	0.0411311	0.328564	0.298166	49	tags=57%, list=18%, signal=48%	ENSG00000232810/ENSG00000162892/ENSG00000136244/ENSG00000168685
GO:0080134	regulation of response to stress	69	0.3484	1.45259	0.0412475	0.328564	0.298166	75	tags=38%, list=27%, signal=37%	ENSG00000007908/ENSG00000123610/ENSG00000232810/ENSG00000006210/ENSG00000124875/ENSG00000125538/ENSG00000135919/ENSG00000136244/ENSG00000137462/ENSG00000056558/ENSG00000154451/ENSG00000151651/ENSG00000166523/ENSG00000118503/ENSG00000112096/ENSG00000075213/ENSG00000226979/ENSG00000168961/ENSG00000125730/ENSG00000104856/ENSG00000173432/ENSG00000163132/ENSG00000163874/ENSG00000064651/ENSG00000161940…
GO:0006924	activation-induced cell death of T cells	1	-0.98556	-1.32889	0.0413377	0.328564	0.298166	6	tags=100%, list=2%, signal=98%
GO:0070235	regulation of activation-induced cell death of T cells	1	-0.98556	-1.32889	0.0413377	0.328564	0.298166	6	tags=100%, list=2%, signal=98%
GO:0070236	negative regulation of activation-induced cell death of T cells	1	-0.98556	-1.32889	0.0413377	0.328564	0.298166	6	tags=100%, list=2%, signal=98%
GO:0031334	positive regulation of protein-containing complex assembly	8	0.594426	1.58219	0.0416141	0.328564	0.298166	60	tags=62%, list=22%, signal=50%	ENSG00000232810/ENSG00000108342/ENSG00000154451/ENSG00000067798/ENSG00000090339
GO:0050728	negative regulation of inflammatory response	8	0.595342	1.58463	0.0416141	0.328564	0.298166	65	tags=62%, list=23%, signal=49%	ENSG00000123610/ENSG00000006210/ENSG00000118503/ENSG00000173432/ENSG00000163874
GO:0016441	posttranscriptional gene silencing	3	0.774545	1.46508	0.0416667	0.328564	0.298166	65	tags=100%, list=23%, signal=77%	ENSG00000232810/ENSG00000136244/ENSG00000163874
GO:0016458	gene silencing	3	0.774545	1.46508	0.0416667	0.328564	0.298166	65	tags=100%, list=23%, signal=77%	ENSG00000232810/ENSG00000136244/ENSG00000163874
GO:0031047	gene silencing by RNA	3	0.774545	1.46508	0.0416667	0.328564	0.298166	65	tags=100%, list=23%, signal=77%	ENSG00000232810/ENSG00000136244/ENSG00000163874
GO:0031050	dsRNA processing	3	0.774545	1.46508	0.0416667	0.328564	0.298166	65	tags=100%, list=23%, signal=77%	ENSG00000232810/ENSG00000136244/ENSG00000163874
GO:0032691	negative regulation of interleukin-1 beta production	3	0.774545	1.46508	0.0416667	0.328564	0.298166	65	tags=100%, list=23%, signal=77%	ENSG00000006210/ENSG00000118503/ENSG00000163874
GO:0034116	positive regulation of heterotypic cell-cell adhesion	3	0.773692	1.46346	0.0416667	0.328564	0.298166	20	tags=67%, list=7%, signal=63%	ENSG00000232810/ENSG00000125538
GO:0035194	post-transcriptional gene silencing by RNA	3	0.774545	1.46508	0.0416667	0.328564	0.298166	65	tags=100%, list=23%, signal=77%	ENSG00000232810/ENSG00000136244/ENSG00000163874
GO:0035195	gene silencing by miRNA	3	0.774545	1.46508	0.0416667	0.328564	0.298166	65	tags=100%, list=23%, signal=77%	ENSG00000232810/ENSG00000136244/ENSG00000163874
GO:0035196	production of miRNAs involved in gene silencing by miRNA	3	0.774545	1.46508	0.0416667	0.328564	0.298166	65	tags=100%, list=23%, signal=77%	ENSG00000232810/ENSG00000136244/ENSG00000163874
GO:0048710	regulation of astrocyte differentiation	3	0.771199	1.45875	0.0416667	0.328564	0.298166	29	tags=67%, list=10%, signal=60%	ENSG00000135919/ENSG00000136244
GO:0060147	regulation of posttranscriptional gene silencing	3	0.774545	1.46508	0.0416667	0.328564	0.298166	65	tags=100%, list=23%, signal=77%	ENSG00000232810/ENSG00000136244/ENSG00000163874
GO:0060149	negative regulation of posttranscriptional gene silencing	3	0.774545	1.46508	0.0416667	0.328564	0.298166	65	tags=100%, list=23%, signal=77%	ENSG00000232810/ENSG00000136244/ENSG00000163874
GO:0060964	regulation of gene silencing by miRNA	3	0.774545	1.46508	0.0416667	0.328564	0.298166	65	tags=100%, list=23%, signal=77%	ENSG00000232810/ENSG00000136244/ENSG00000163874
GO:0060965	negative regulation of gene silencing by miRNA	3	0.774545	1.46508	0.0416667	0.328564	0.298166	65	tags=100%, list=23%, signal=77%	ENSG00000232810/ENSG00000136244/ENSG00000163874
GO:0060966	regulation of gene silencing by RNA	3	0.774545	1.46508	0.0416667	0.328564	0.298166	65	tags=100%, list=23%, signal=77%	ENSG00000232810/ENSG00000136244/ENSG00000163874
GO:0060967	negative regulation of gene silencing by RNA	3	0.774545	1.46508	0.0416667	0.328564	0.298166	65	tags=100%, list=23%, signal=77%	ENSG00000232810/ENSG00000136244/ENSG00000163874
GO:0060968	regulation of gene silencing	3	0.774545	1.46508	0.0416667	0.328564	0.298166	65	tags=100%, list=23%, signal=77%	ENSG00000232810/ENSG00000136244/ENSG00000163874
GO:0060969	negative regulation of gene silencing	3	0.774545	1.46508	0.0416667	0.328564	0.298166	65	tags=100%, list=23%, signal=77%	ENSG00000232810/ENSG00000136244/ENSG00000163874
GO:0070918	production of small RNA involved in gene silencing by RNA	3	0.774545	1.46508	0.0416667	0.328564	0.298166	65	tags=100%, list=23%, signal=77%	ENSG00000232810/ENSG00000136244/ENSG00000163874
GO:0070920	regulation of production of small RNA involved in gene silencing by RNA	3	0.774545	1.46508	0.0416667	0.328564	0.298166	65	tags=100%, list=23%, signal=77%	ENSG00000232810/ENSG00000136244/ENSG00000163874
GO:1903798	regulation of production of miRNAs involved in gene silencing by miRNA	3	0.774545	1.46508	0.0416667	0.328564	0.298166	65	tags=100%, list=23%, signal=77%	ENSG00000232810/ENSG00000136244/ENSG00000163874
GO:1903799	negative regulation of production of miRNAs involved in gene silencing by miRNA	3	0.774545	1.46508	0.0416667	0.328564	0.298166	65	tags=100%, list=23%, signal=77%	ENSG00000232810/ENSG00000136244/ENSG00000163874
GO:0050871	positive regulation of B cell activation	2	0.847826	1.38823	0.0423012	0.332566	0.301798	44	tags=100%, list=16%, signal=85%	ENSG00000136244/ENSG00000102524
GO:0072679	thymocyte migration	2	0.851449	1.39416	0.0423012	0.332566	0.301798	43	tags=100%, list=15%, signal=85%	ENSG00000115009/ENSG00000151651
GO:0007254	JNK cascade	10	0.554332	1.56506	0.0423729	0.33263	0.301856	67	tags=60%, list=24%, signal=47%	ENSG00000232810/ENSG00000125538/ENSG00000056558/ENSG00000075213/ENSG00000134070/ENSG00000173334
GO:0002367	cytokine production involved in immune response	9	0.576782	1.57857	0.0426065	0.333964	0.303066	33	tags=44%, list=12%, signal=40%	ENSG00000232810/ENSG00000125538/ENSG00000136244/ENSG00000137462
GO:0060840	artery development	5	-0.626374	-1.6619	0.043156	0.336878	0.305711	108	tags=100%, list=39%, signal=62%	ENSG00000101384/ENSG00000167034/ENSG00000130164/ENSG00000137834
GO:0031664	regulation of lipopolysaccharide-mediated signaling pathway	3	0.767273	1.45132	0.0432099	0.336878	0.305711	67	tags=100%, list=24%, signal=77%	ENSG00000006210/ENSG00000118503/ENSG00000173334
GO:0045931	positive regulation of mitotic cell cycle	3	0.768002	1.4527	0.0432099	0.336878	0.305711	27	tags=67%, list=10%, signal=61%	ENSG00000125538/ENSG00000115008
GO:0045685	regulation of glial cell differentiation	5	0.683259	1.55169	0.0432357	0.336878	0.305711	33	tags=60%, list=12%, signal=54%	ENSG00000135919/ENSG00000136244/ENSG00000137462
GO:0001937	negative regulation of endothelial cell proliferation	4	0.737499	1.53298	0.0435414	0.338756	0.307415	9	tags=50%, list=3%, signal=49%	ENSG00000232810/ENSG00000108691
GO:0098542	defense response to other organism	63	0.3561	1.46504	0.0436105	0.338791	0.307447	65	tags=35%, list=23%, signal=35%	ENSG00000232810/ENSG00000006210/ENSG00000124875/ENSG00000162692/ENSG00000108691/ENSG00000115009/ENSG00000169245/ENSG00000125538/ENSG00000136244/ENSG00000137462/ENSG00000154451/ENSG00000151651/ENSG00000166523/ENSG00000118503/ENSG00000226979/ENSG00000163661/ENSG00000168961/ENSG00000125730/ENSG00000104856/ENSG00000090339/ENSG00000173432/ENSG00000163874
GO:0034614	cellular response to reactive oxygen species	6	0.64541	1.55106	0.044	0.34131	0.309733	50	tags=67%, list=18%, signal=56%	ENSG00000232810/ENSG00000136244/ENSG00000118503/ENSG00000112096
GO:0050873	brown fat cell differentiation	3	0.763636	1.44444	0.0447531	0.346638	0.314568	68	tags=100%, list=24%, signal=76%	ENSG00000211448/ENSG00000196878/ENSG00000171236
GO:0032535	regulation of cellular component size	9	0.572237	1.56613	0.0451128	0.348908	0.316628	70	tags=67%, list=25%, signal=52%	ENSG00000108342/ENSG00000153993/ENSG00000168685/ENSG00000075213/ENSG00000090339/ENSG00000064651
GO:0050863	regulation of T cell activation	22	0.445205	1.53789	0.0453564	0.350274	0.317868	120	tags=73%, list=43%, signal=45%	ENSG00000162692/ENSG00000108691/ENSG00000125538/ENSG00000115008/ENSG00000136244/ENSG00000151651/ENSG00000102524/ENSG00000168685/ENSG00000168961/ENSG00000163874/ENSG00000104312/ENSG00000144802/ENSG00000146072/ENSG00000105639/ENSG00000110944/ENSG00000125347
GO:0042325	regulation of phosphorylation	60	0.355672	1.45724	0.0455927	0.351581	0.319054	72	tags=38%, list=26%, signal=36%	ENSG00000232810/ENSG00000006210/ENSG00000108691/ENSG00000115009/ENSG00000108342/ENSG00000169245/ENSG00000125538/ENSG00000162892/ENSG00000136244/ENSG00000056558/ENSG00000151651/ENSG00000118503/ENSG00000075213/ENSG00000134070/ENSG00000168961/ENSG00000125730/ENSG00000090339/ENSG00000173432/ENSG00000120875/ENSG00000163874/ENSG00000173334/ENSG00000138675/ENSG00000122641
GO:0018105	peptidyl-serine phosphorylation	10	0.549061	1.55018	0.0460048	0.353717	0.320992	29	tags=40%, list=10%, signal=37%	ENSG00000232810/ENSG00000108342/ENSG00000162892/ENSG00000136244
GO:0018209	peptidyl-serine modification	10	0.549061	1.55018	0.0460048	0.353717	0.320992	29	tags=40%, list=10%, signal=37%	ENSG00000232810/ENSG00000108342/ENSG00000162892/ENSG00000136244
GO:0048193	Golgi vesicle transport	4	-0.642336	-1.51848	0.0461249	0.353987	0.321237	103	tags=100%, list=37%, signal=64%	ENSG00000128641/ENSG00000117475/ENSG00000162407
GO:0042098	T cell proliferation	13	0.509322	1.56045	0.0462428	0.353987	0.321237	120	tags=85%, list=43%, signal=50%	ENSG00000162692/ENSG00000125538/ENSG00000115008/ENSG00000136244/ENSG00000102524/ENSG00000168961/ENSG00000104312/ENSG00000146072/ENSG00000105639/ENSG00000110944/ENSG00000125347
GO:0045580	regulation of T cell differentiation	13	0.509222	1.56014	0.0462428	0.353987	0.321237	120	tags=85%, list=43%, signal=50%	ENSG00000125538/ENSG00000115008/ENSG00000151651/ENSG00000168685/ENSG00000168961/ENSG00000163874/ENSG00000104312/ENSG00000144802/ENSG00000105639/ENSG00000110944/ENSG00000125347
GO:0006468	protein phosphorylation	64	0.351523	1.44891	0.0466059	0.355989	0.323054	72	tags=38%, list=26%, signal=36%	ENSG00000232810/ENSG00000006210/ENSG00000108691/ENSG00000115009/ENSG00000108342/ENSG00000169245/ENSG00000125538/ENSG00000162892/ENSG00000136244/ENSG00000137462/ENSG00000056558/ENSG00000151651/ENSG00000118503/ENSG00000075213/ENSG00000134070/ENSG00000168961/ENSG00000125730/ENSG00000090339/ENSG00000173432/ENSG00000120875/ENSG00000163874/ENSG00000173334/ENSG00000138675/ENSG00000122641
GO:0031623	receptor internalization	6	0.640433	1.5391	0.0466667	0.355989	0.323054	4	tags=33%, list=1%, signal=34%	ENSG00000007908/ENSG00000169429
GO:0002634	regulation of germinal center formation	2	0.833333	1.3645	0.0473773	0.355989	0.323054	48	tags=100%, list=17%, signal=83%	ENSG00000102524/ENSG00000118503
GO:0031581	hemidesmosome assembly	2	0.836957	1.37043	0.0473773	0.355989	0.323054	47	tags=100%, list=17%, signal=84%	ENSG00000058085/ENSG00000196878
GO:0042093	T-helper cell differentiation	7	0.608856	1.55054	0.0475578	0.355989	0.323054	113	tags=100%, list=41%, signal=61%	ENSG00000136244/ENSG00000104856/ENSG00000163874/ENSG00000104312/ENSG00000144802/ENSG00000105639/ENSG00000110944
GO:0002052	positive regulation of neuroblast proliferation	1	0.981949	1.30324	0.0479578	0.355989	0.323054	6	tags=100%, list=2%, signal=98%	ENSG00000006210
GO:0032610	interleukin-1 alpha production	1	0.981949	1.30324	0.0479578	0.355989	0.323054	6	tags=100%, list=2%, signal=98%	ENSG00000006210
GO:0032650	regulation of interleukin-1 alpha production	1	0.981949	1.30324	0.0479578	0.355989	0.323054	6	tags=100%, list=2%, signal=98%	ENSG00000006210
GO:0032690	negative regulation of interleukin-1 alpha production	1	0.981949	1.30324	0.0479578	0.355989	0.323054	6	tags=100%, list=2%, signal=98%	ENSG00000006210
GO:0033622	integrin activation	1	0.981949	1.30324	0.0479578	0.355989	0.323054	6	tags=100%, list=2%, signal=98%	ENSG00000006210
GO:0035425	autocrine signaling	1	0.981949	1.30324	0.0479578	0.355989	0.323054	6	tags=100%, list=2%, signal=98%	ENSG00000006210
GO:0050902	leukocyte adhesive activation	1	0.981949	1.30324	0.0479578	0.355989	0.323054	6	tags=100%, list=2%, signal=98%	ENSG00000006210
GO:0051040	regulation of calcium-independent cell-cell adhesion	1	0.981949	1.30324	0.0479578	0.355989	0.323054	6	tags=100%, list=2%, signal=98%	ENSG00000006210
GO:0051041	positive regulation of calcium-independent cell-cell adhesion	1	0.981949	1.30324	0.0479578	0.355989	0.323054	6	tags=100%, list=2%, signal=98%	ENSG00000006210
GO:0110088	hippocampal neuron apoptotic process	1	0.981949	1.30324	0.0479578	0.355989	0.323054	6	tags=100%, list=2%, signal=98%	ENSG00000006210
GO:0110089	regulation of hippocampal neuron apoptotic process	1	0.981949	1.30324	0.0479578	0.355989	0.323054	6	tags=100%, list=2%, signal=98%	ENSG00000006210
GO:0110091	negative regulation of hippocampal neuron apoptotic process	1	0.981949	1.30324	0.0479578	0.355989	0.323054	6	tags=100%, list=2%, signal=98%	ENSG00000006210
GO:1900450	negative regulation of glutamate receptor signaling pathway	1	0.981949	1.30324	0.0479578	0.355989	0.323054	6	tags=100%, list=2%, signal=98%	ENSG00000006210
GO:1902692	regulation of neuroblast proliferation	1	0.981949	1.30324	0.0479578	0.355989	0.323054	6	tags=100%, list=2%, signal=98%	ENSG00000006210
GO:2001223	negative regulation of neuron migration	1	0.981949	1.30324	0.0479578	0.355989	0.323054	6	tags=100%, list=2%, signal=98%	ENSG00000006210
GO:0072577	endothelial cell apoptotic process	6	0.638612	1.53472	0.048	0.355989	0.323054	60	tags=67%, list=22%, signal=53%	ENSG00000232810/ENSG00000108691/ENSG00000118503/ENSG00000090339
GO:2000351	regulation of endothelial cell apoptotic process	6	0.638612	1.53472	0.048	0.355989	0.323054	60	tags=67%, list=22%, signal=53%	ENSG00000232810/ENSG00000108691/ENSG00000118503/ENSG00000090339
GO:0048514	blood vessel morphogenesis	38	0.386945	1.47556	0.0488565	0.357149	0.324106	70	tags=39%, list=25%, signal=34%	ENSG00000169429/ENSG00000232810/ENSG00000006210/ENSG00000108691/ENSG00000169245/ENSG00000125538/ENSG00000115008/ENSG00000136244/ENSG00000185215/ENSG00000151651/ENSG00000118503/ENSG00000125730/ENSG00000163874/ENSG00000171236/ENSG00000064651
GO:0051873	killing by host of symbiont cells	1	0.978339	1.29845	0.0489237	0.357149	0.324106	7	tags=100%, list=3%, signal=98%	ENSG00000124875
GO:0070942	neutrophil mediated cytotoxicity	1	0.978339	1.29845	0.0489237	0.357149	0.324106	7	tags=100%, list=3%, signal=98%	ENSG00000124875
GO:0070943	neutrophil-mediated killing of symbiont cell	1	0.978339	1.29845	0.0489237	0.357149	0.324106	7	tags=100%, list=3%, signal=98%	ENSG00000124875
GO:0070944	neutrophil-mediated killing of bacterium	1	0.978339	1.29845	0.0489237	0.357149	0.324106	7	tags=100%, list=3%, signal=98%	ENSG00000124875
GO:0070945	neutrophil-mediated killing of gram-negative bacterium	1	0.978339	1.29845	0.0489237	0.357149	0.324106	7	tags=100%, list=3%, signal=98%	ENSG00000124875
GO:0070948	regulation of neutrophil mediated cytotoxicity	1	0.978339	1.29845	0.0489237	0.357149	0.324106	7	tags=100%, list=3%, signal=98%	ENSG00000124875
GO:0070949	regulation of neutrophil mediated killing of symbiont cell	1	0.978339	1.29845	0.0489237	0.357149	0.324106	7	tags=100%, list=3%, signal=98%	ENSG00000124875
GO:0070950	regulation of neutrophil mediated killing of bacterium	1	0.978339	1.29845	0.0489237	0.357149	0.324106	7	tags=100%, list=3%, signal=98%	ENSG00000124875
GO:0070951	regulation of neutrophil mediated killing of gram-negative bacterium	1	0.978339	1.29845	0.0489237	0.357149	0.324106	7	tags=100%, list=3%, signal=98%	ENSG00000124875
GO:1900424	regulation of defense response to bacterium	1	0.978339	1.29845	0.0489237	0.357149	0.324106	7	tags=100%, list=3%, signal=98%	ENSG00000124875
GO:0050866	negative regulation of cell activation	15	0.479218	1.52089	0.0489749	0.357149	0.324106	120	tags=80%, list=43%, signal=48%	ENSG00000006210/ENSG00000204482/ENSG00000135919/ENSG00000118503/ENSG00000168961/ENSG00000163874/ENSG00000122641/ENSG00000146072/ENSG00000105639/ENSG00000204642/ENSG00000173918/ENSG00000125347
GO:0070371	ERK1 and ERK2 cascade	18	0.460844	1.53215	0.0491803	0.35765	0.324561	20	tags=28%, list=7%, signal=28%	ENSG00000232810/ENSG00000006210/ENSG00000108691/ENSG00000115009/ENSG00000125538
GO:0070372	regulation of ERK1 and ERK2 cascade	18	0.460844	1.53215	0.0491803	0.35765	0.324561	20	tags=28%, list=7%, signal=28%	ENSG00000232810/ENSG00000006210/ENSG00000108691/ENSG00000115009/ENSG00000125538
GO:0019079	viral genome replication	11	0.529048	1.53187	0.0494572	0.358667	0.325484	9	tags=27%, list=3%, signal=27%	ENSG00000169429/ENSG00000232810/ENSG00000108691
GO:0051924	regulation of calcium ion transport	11	0.530394	1.53576	0.0494572	0.358667	0.325484	26	tags=36%, list=9%, signal=34%	ENSG00000006210/ENSG00000108691/ENSG00000169245/ENSG00000169248
GO:0031399	regulation of protein modification process	61	0.349741	1.43322	0.0505561	0.36613	0.332256	72	tags=38%, list=26%, signal=36%	ENSG00000232810/ENSG00000006210/ENSG00000108691/ENSG00000115009/ENSG00000108342/ENSG00000169245/ENSG00000125538/ENSG00000162892/ENSG00000136244/ENSG00000056558/ENSG00000151651/ENSG00000118503/ENSG00000075213/ENSG00000134070/ENSG00000168961/ENSG00000125730/ENSG00000090339/ENSG00000173432/ENSG00000120875/ENSG00000163874/ENSG00000173334/ENSG00000138675/ENSG00000122641
GO:0065009	regulation of molecular function	85	0.330836	1.39831	0.0512048	0.370316	0.336055	67	tags=33%, list=24%, signal=36%	ENSG00000007908/ENSG00000232810/ENSG00000006210/ENSG00000108691/ENSG00000115009/ENSG00000163739/ENSG00000108342/ENSG00000169245/ENSG00000125538/ENSG00000135919/ENSG00000115008/ENSG00000136244/ENSG00000105825/ENSG00000137462/ENSG00000056558/ENSG00000163131/ENSG00000151651/ENSG00000118503/ENSG00000134070/ENSG00000163661/ENSG00000168961/ENSG00000125730/ENSG00000090339/ENSG00000173432/ENSG00000163132…
GO:1904018	positive regulation of vasculature development	16	0.4768	1.54155	0.0514541	0.371605	0.337225	77	tags=56%, list=28%, signal=43%	ENSG00000169429/ENSG00000006210/ENSG00000125538/ENSG00000115008/ENSG00000112096/ENSG00000125730/ENSG00000163874/ENSG00000171236/ENSG00000091879
GO:0060627	regulation of vesicle-mediated transport	20	0.451577	1.53367	0.0518359	0.373846	0.339259	58	tags=40%, list=21%, signal=34%	ENSG00000007908/ENSG00000232810/ENSG00000108691/ENSG00000125538/ENSG00000137462/ENSG00000163661/ENSG00000168961/ENSG00000125730
GO:0090276	regulation of peptide hormone secretion	7	0.599817	1.52752	0.0526992	0.37955	0.344435	29	tags=43%, list=10%, signal=39%	ENSG00000232810/ENSG00000125538/ENSG00000136244
GO:0051045	negative regulation of membrane protein ectodomain proteolysis	1	-0.981949	-1.32402	0.0529532	0.380855	0.34562	7	tags=100%, list=3%, signal=98%
GO:0051246	regulation of protein metabolic process	81	0.335233	1.40985	0.0531595	0.381815	0.34649	72	tags=36%, list=26%, signal=37%	ENSG00000232810/ENSG00000006210/ENSG00000108691/ENSG00000115009/ENSG00000108342/ENSG00000169245/ENSG00000125538/ENSG00000162892/ENSG00000135919/ENSG00000136244/ENSG00000105825/ENSG00000211448/ENSG00000056558/ENSG00000151651/ENSG00000101670/ENSG00000118503/ENSG00000075213/ENSG00000134070/ENSG00000163661/ENSG00000168961/ENSG00000125730/ENSG00000090339/ENSG00000173432/ENSG00000120875/ENSG00000163874…
GO:0032873	negative regulation of stress-activated MAPK cascade	2	-0.862319	-1.52435	0.0535131	0.382401	0.347022	41	tags=100%, list=15%, signal=86%	ENSG00000179094
GO:0046329	negative regulation of JNK cascade	2	-0.862319	-1.52435	0.0535131	0.382401	0.347022	41	tags=100%, list=15%, signal=86%	ENSG00000179094
GO:0070303	negative regulation of stress-activated protein kinase signaling cascade	2	-0.862319	-1.52435	0.0535131	0.382401	0.347022	41	tags=100%, list=15%, signal=86%	ENSG00000179094
GO:0097190	apoptotic signaling pathway	26	0.427306	1.51398	0.0535332	0.382401	0.347022	62	tags=42%, list=22%, signal=36%	ENSG00000232810/ENSG00000006210/ENSG00000125538/ENSG00000115008/ENSG00000123689/ENSG00000056558/ENSG00000118503/ENSG00000112096/ENSG00000168961/ENSG00000090339/ENSG00000163132
GO:0034762	regulation of transmembrane transport	22	0.433736	1.49827	0.0539957	0.38373	0.348228	39	tags=32%, list=14%, signal=30%	ENSG00000232810/ENSG00000006210/ENSG00000108691/ENSG00000169245/ENSG00000125538/ENSG00000169248/ENSG00000163131
GO:0010623	programmed cell death involved in cell development	3	0.759399	1.43643	0.0540123	0.38373	0.348228	27	tags=67%, list=10%, signal=61%	ENSG00000125538/ENSG00000115008
GO:0035234	ectopic germ cell programmed cell death	3	0.759399	1.43643	0.0540123	0.38373	0.348228	27	tags=67%, list=10%, signal=61%	ENSG00000125538/ENSG00000115008
GO:0061043	regulation of vascular wound healing	3	0.756364	1.43068	0.0540123	0.38373	0.348228	70	tags=100%, list=25%, signal=76%	ENSG00000232810/ENSG00000118503/ENSG00000064651
GO:1901224	positive regulation of NIK/NF-kappaB signaling	6	0.631123	1.51672	0.0546667	0.387852	0.351969	57	tags=67%, list=21%, signal=54%	ENSG00000232810/ENSG00000125538/ENSG00000137462/ENSG00000168961
GO:0050994	regulation of lipid catabolic process	4	0.725982	1.50904	0.0551524	0.389855	0.353787	20	tags=50%, list=7%, signal=47%	ENSG00000232810/ENSG00000125538
GO:0051043	regulation of membrane protein ectodomain proteolysis	4	0.725834	1.50873	0.0551524	0.389855	0.353787	43	tags=75%, list=15%, signal=64%	ENSG00000232810/ENSG00000125538/ENSG00000151651
GO:0006909	phagocytosis	14	0.487752	1.52038	0.0551724	0.389855	0.353787	58	tags=43%, list=21%, signal=36%	ENSG00000232810/ENSG00000108691/ENSG00000125538/ENSG00000137462/ENSG00000163661/ENSG00000125730
GO:0001960	negative regulation of cytokine-mediated signaling pathway	3	0.752084	1.42259	0.0555556	0.390455	0.354331	29	tags=67%, list=10%, signal=60%	ENSG00000136689/ENSG00000136244
GO:0007088	regulation of mitotic nuclear division	3	0.752727	1.42381	0.0555556	0.390455	0.354331	71	tags=100%, list=26%, signal=75%	ENSG00000125538/ENSG00000115008/ENSG00000138411
GO:0060761	negative regulation of response to cytokine stimulus	3	0.752084	1.42259	0.0555556	0.390455	0.354331	29	tags=67%, list=10%, signal=60%	ENSG00000136689/ENSG00000136244
GO:0140014	mitotic nuclear division	3	0.752727	1.42381	0.0555556	0.390455	0.354331	71	tags=100%, list=26%, signal=75%	ENSG00000125538/ENSG00000115008/ENSG00000138411
GO:0006816	calcium ion transport	12	0.504131	1.48962	0.0556872	0.390855	0.354695	26	tags=33%, list=9%, signal=32%	ENSG00000006210/ENSG00000108691/ENSG00000169245/ENSG00000169248
GO:0022402	cell cycle process	14	0.485473	1.51327	0.0563218	0.394253	0.357778	79	tags=57%, list=28%, signal=43%	ENSG00000169429/ENSG00000108691/ENSG00000125538/ENSG00000115008/ENSG00000163132/ENSG00000138411/ENSG00000122641/ENSG00000139289
GO:0045766	positive regulation of angiogenesis	14	0.486299	1.51585	0.0563218	0.394253	0.357778	77	tags=57%, list=28%, signal=44%	ENSG00000169429/ENSG00000006210/ENSG00000125538/ENSG00000115008/ENSG00000125730/ENSG00000163874/ENSG00000171236/ENSG00000091879
GO:0019935	cyclic-nucleotide-mediated signaling	3	0.748547	1.4159	0.0570988	0.39479	0.358265	26	tags=67%, list=9%, signal=61%	ENSG00000169245/ENSG00000169248
GO:0032689	negative regulation of interferon-gamma production	3	0.749091	1.41693	0.0570988	0.39479	0.358265	72	tags=100%, list=26%, signal=75%	ENSG00000168961/ENSG00000163874/ENSG00000122641
GO:2000243	positive regulation of reproductive process	3	0.749091	1.41693	0.0570988	0.39479	0.358265	72	tags=100%, list=26%, signal=75%	ENSG00000075213/ENSG00000163132/ENSG00000122641
GO:0003279	cardiac septum development	4	-0.624088	-1.47534	0.0571607	0.39479	0.358265	108	tags=100%, list=39%, signal=62%	ENSG00000101384/ENSG00000075223/ENSG00000137834
GO:0035904	aorta development	4	-0.624088	-1.47534	0.0571607	0.39479	0.358265	108	tags=100%, list=39%, signal=62%	ENSG00000101384/ENSG00000167034/ENSG00000137834
GO:0000280	nuclear division	5	0.666559	1.51376	0.0571827	0.39479	0.358265	71	tags=80%, list=26%, signal=61%	ENSG00000125538/ENSG00000115008/ENSG00000163132/ENSG00000138411
GO:0051173	positive regulation of nitrogen compound metabolic process	82	0.333008	1.39901	0.0572864	0.39479	0.358265	74	tags=37%, list=27%, signal=38%	ENSG00000232810/ENSG00000006210/ENSG00000108691/ENSG00000115009/ENSG00000108342/ENSG00000169245/ENSG00000125538/ENSG00000162892/ENSG00000115008/ENSG00000136244/ENSG00000137462/ENSG00000028277/ENSG00000056558/ENSG00000151651/ENSG00000118503/ENSG00000075213/ENSG00000134070/ENSG00000163661/ENSG00000168961/ENSG00000125730/ENSG00000104856/ENSG00000090339/ENSG00000173432/ENSG00000163132/ENSG00000163874…
GO:0032623	interleukin-2 production	6	0.627435	1.50786	0.0573333	0.39479	0.358265	54	tags=67%, list=19%, signal=55%	ENSG00000125538/ENSG00000115008/ENSG00000118503/ENSG00000067798
GO:0032663	regulation of interleukin-2 production	6	0.627435	1.50786	0.0573333	0.39479	0.358265	54	tags=67%, list=19%, signal=55%	ENSG00000125538/ENSG00000115008/ENSG00000118503/ENSG00000067798
GO:0033135	regulation of peptidyl-serine phosphorylation	6	0.626291	1.50511	0.0573333	0.39479	0.358265	29	tags=50%, list=10%, signal=46%	ENSG00000232810/ENSG00000108342/ENSG00000136244
GO:1902905	positive regulation of supramolecular fiber organization	6	0.626748	1.50621	0.0573333	0.39479	0.358265	60	tags=67%, list=22%, signal=53%	ENSG00000006210/ENSG00000108342/ENSG00000067798/ENSG00000090339
GO:0008045	motor neuron axon guidance	2	0.822464	1.3467	0.0575296	0.39479	0.358265	51	tags=100%, list=18%, signal=82%	ENSG00000058085/ENSG00000075213
GO:0021675	nerve development	2	0.822464	1.3467	0.0575296	0.39479	0.358265	51	tags=100%, list=18%, signal=82%	ENSG00000135919/ENSG00000075213
GO:0060384	innervation	2	0.822464	1.3467	0.0575296	0.39479	0.358265	51	tags=100%, list=18%, signal=82%	ENSG00000135919/ENSG00000075213
GO:2001222	regulation of neuron migration	2	0.822464	1.3467	0.0575296	0.39479	0.358265	51	tags=100%, list=18%, signal=82%	ENSG00000006210/ENSG00000075213
GO:0006809	nitric oxide biosynthetic process	8	0.573993	1.52781	0.0580076	0.396703	0.360001	65	tags=62%, list=23%, signal=49%	ENSG00000232810/ENSG00000125538/ENSG00000163661/ENSG00000090339/ENSG00000163874
GO:1903409	reactive oxygen species biosynthetic process	8	0.573993	1.52781	0.0580076	0.396703	0.360001	65	tags=62%, list=23%, signal=49%	ENSG00000232810/ENSG00000125538/ENSG00000163661/ENSG00000090339/ENSG00000163874
GO:0062197	cellular response to chemical stress	10	0.536625	1.51507	0.0581114	0.396703	0.360001	65	tags=60%, list=23%, signal=48%	ENSG00000232810/ENSG00000136244/ENSG00000118503/ENSG00000112096/ENSG00000104856/ENSG00000163874
GO:0071706	tumor necrosis factor superfamily cytokine production	10	0.538262	1.51969	0.0581114	0.396703	0.360001	65	tags=60%, list=23%, signal=48%	ENSG00000006210/ENSG00000137462/ENSG00000151651/ENSG00000118503/ENSG00000168961/ENSG00000163874
GO:0140039	cell-cell adhesion in response to extracellular stimulus	1	0.974729	1.29366	0.0587084	0.400257	0.363226	8	tags=100%, list=3%, signal=97%	ENSG00000162692
GO:0045596	negative regulation of cell differentiation	28	0.414505	1.48455	0.0593849	0.403596	0.366256	72	tags=43%, list=26%, signal=35%	ENSG00000232810/ENSG00000006210/ENSG00000134363/ENSG00000169245/ENSG00000125538/ENSG00000136244/ENSG00000153993/ENSG00000075213/ENSG00000163132/ENSG00000163874/ENSG00000173334/ENSG00000122641
GO:0042303	molting cycle	4	0.719374	1.4953	0.0595065	0.403596	0.366256	10	tags=50%, list=4%, signal=49%	ENSG00000232810/ENSG00000134363
GO:0042633	hair cycle	4	0.719374	1.4953	0.0595065	0.403596	0.366256	10	tags=50%, list=4%, signal=49%	ENSG00000232810/ENSG00000134363
GO:0045445	myoblast differentiation	4	0.716839	1.49003	0.0595065	0.403596	0.366256	17	tags=50%, list=6%, signal=48%	ENSG00000232810/ENSG00000169245
GO:0002705	positive regulation of leukocyte mediated immunity	9	0.558126	1.52751	0.0601504	0.407435	0.36974	58	tags=56%, list=21%, signal=45%	ENSG00000232810/ENSG00000125538/ENSG00000136244/ENSG00000226979/ENSG00000125730
GO:0070304	positive regulation of stress-activated protein kinase signaling cascade	8	0.572712	1.5244	0.0605296	0.408097	0.370341	65	tags=62%, list=23%, signal=49%	ENSG00000232810/ENSG00000125538/ENSG00000056558/ENSG00000075213/ENSG00000163874
GO:0070588	calcium ion transmembrane transport	8	0.57149	1.52114	0.0605296	0.408097	0.370341	26	tags=38%, list=9%, signal=35%	ENSG00000006210/ENSG00000169245/ENSG00000169248
GO:0007193	adenylate cyclase-inhibiting G protein-coupled receptor signaling pathway	2	-0.836957	-1.47952	0.0605327	0.408097	0.370341	48	tags=100%, list=17%, signal=83%	ENSG00000113389
GO:0006486	protein glycosylation	2	-0.847826	-1.49873	0.0607937	0.408097	0.370341	45	tags=100%, list=16%, signal=84%	ENSG00000131386
GO:0034637	cellular carbohydrate biosynthetic process	2	-0.847826	-1.49873	0.0607937	0.408097	0.370341	45	tags=100%, list=16%, signal=84%	ENSG00000169047
GO:0043413	macromolecule glycosylation	2	-0.847826	-1.49873	0.0607937	0.408097	0.370341	45	tags=100%, list=16%, signal=84%	ENSG00000131386
GO:0070085	glycosylation	2	-0.847826	-1.49873	0.0607937	0.408097	0.370341	45	tags=100%, list=16%, signal=84%	ENSG00000131386
GO:0097320	plasma membrane tubulation	1	-0.974729	-1.31429	0.0610998	0.409308	0.37144	9	tags=100%, list=3%, signal=97%
GO:0002831	regulation of response to biotic stimulus	24	0.428033	1.50066	0.0612245	0.409308	0.37144	67	tags=46%, list=24%, signal=38%	ENSG00000006210/ENSG00000124875/ENSG00000125538/ENSG00000154451/ENSG00000151651/ENSG00000166523/ENSG00000118503/ENSG00000168961/ENSG00000104856/ENSG00000163874/ENSG00000173334
GO:0032609	interferon-gamma production	9	0.554288	1.51701	0.0614035	0.409308	0.37144	113	tags=89%, list=41%, signal=55%	ENSG00000232810/ENSG00000125538/ENSG00000226979/ENSG00000168961/ENSG00000163874/ENSG00000122641/ENSG00000104312/ENSG00000110944
GO:0032649	regulation of interferon-gamma production	9	0.554288	1.51701	0.0614035	0.409308	0.37144	113	tags=89%, list=41%, signal=55%	ENSG00000232810/ENSG00000125538/ENSG00000226979/ENSG00000168961/ENSG00000163874/ENSG00000122641/ENSG00000104312/ENSG00000110944
GO:0043254	regulation of protein-containing complex assembly	9	0.549643	1.50429	0.0614035	0.409308	0.37144	60	tags=56%, list=22%, signal=45%	ENSG00000232810/ENSG00000108342/ENSG00000154451/ENSG00000067798/ENSG00000090339
GO:1902107	positive regulation of leukocyte differentiation	15	0.466349	1.48005	0.0615034	0.409308	0.37144	113	tags=73%, list=41%, signal=46%	ENSG00000232810/ENSG00000125538/ENSG00000115008/ENSG00000151651/ENSG00000168685/ENSG00000168961/ENSG00000173334/ENSG00000184371/ENSG00000104312/ENSG00000144802/ENSG00000110944
GO:0010959	regulation of metal ion transport	16	0.465866	1.5062	0.0615213	0.409308	0.37144	26	tags=31%, list=9%, signal=30%	ENSG00000006210/ENSG00000108691/ENSG00000169245/ENSG00000135919/ENSG00000169248
GO:0048661	positive regulation of smooth muscle cell proliferation	8	0.569428	1.51566	0.0617907	0.410579	0.372593	29	tags=38%, list=10%, signal=35%	ENSG00000232810/ENSG00000006210/ENSG00000136244
GO:0002439	chronic inflammatory response to antigenic stimulus	2	0.818841	1.34077	0.0626058	0.410782	0.372777	52	tags=100%, list=19%, signal=82%	ENSG00000232810/ENSG00000226979
GO:0002678	positive regulation of chronic inflammatory response	2	0.818841	1.34077	0.0626058	0.410782	0.372777	52	tags=100%, list=19%, signal=82%	ENSG00000232810/ENSG00000226979
GO:0002874	regulation of chronic inflammatory response to antigenic stimulus	2	0.818841	1.34077	0.0626058	0.410782	0.372777	52	tags=100%, list=19%, signal=82%	ENSG00000232810/ENSG00000226979
GO:0002876	positive regulation of chronic inflammatory response to antigenic stimulus	2	0.818841	1.34077	0.0626058	0.410782	0.372777	52	tags=100%, list=19%, signal=82%	ENSG00000232810/ENSG00000226979
GO:0002923	regulation of humoral immune response mediated by circulating immunoglobulin	2	0.818841	1.34077	0.0626058	0.410782	0.372777	52	tags=100%, list=19%, signal=82%	ENSG00000232810/ENSG00000226979
GO:0002925	positive regulation of humoral immune response mediated by circulating immunoglobulin	2	0.818841	1.34077	0.0626058	0.410782	0.372777	52	tags=100%, list=19%, signal=82%	ENSG00000232810/ENSG00000226979
GO:0010517	regulation of phospholipase activity	2	0.815791	1.33577	0.0626058	0.410782	0.372777	1	tags=50%, list=0%, signal=50%	ENSG00000007908
GO:0010518	positive regulation of phospholipase activity	2	0.815791	1.33577	0.0626058	0.410782	0.372777	1	tags=50%, list=0%, signal=50%	ENSG00000007908
GO:0060193	positive regulation of lipase activity	2	0.815791	1.33577	0.0626058	0.410782	0.372777	1	tags=50%, list=0%, signal=50%	ENSG00000007908
GO:1902115	regulation of organelle assembly	2	0.817143	1.33799	0.0626058	0.410782	0.372777	5	tags=50%, list=2%, signal=49%	ENSG00000232810
GO:1904037	positive regulation of epithelial cell apoptotic process	3	0.743969	1.40724	0.0632716	0.414631	0.37627	29	tags=67%, list=10%, signal=60%	ENSG00000108691/ENSG00000136244
GO:0002920	regulation of humoral immune response	6	0.62098	1.49235	0.064	0.41888	0.380126	58	tags=67%, list=21%, signal=54%	ENSG00000232810/ENSG00000125538/ENSG00000226979/ENSG00000125730
GO:0032984	protein-containing complex disassembly	2	0.811594	1.3289	0.0642978	0.419052	0.380282	54	tags=100%, list=19%, signal=81%	ENSG00000232810/ENSG00000067798
GO:0043242	negative regulation of protein-containing complex disassembly	2	0.811594	1.3289	0.0642978	0.419052	0.380282	54	tags=100%, list=19%, signal=81%	ENSG00000232810/ENSG00000067798
GO:0043244	regulation of protein-containing complex disassembly	2	0.811594	1.3289	0.0642978	0.419052	0.380282	54	tags=100%, list=19%, signal=81%	ENSG00000232810/ENSG00000067798
GO:0001655	urogenital system development	11	-0.384878	-1.51226	0.0644264	0.419052	0.380282	140	tags=91%, list=50%, signal=47%	ENSG00000104267/ENSG00000166923/ENSG00000164736/ENSG00000101384/ENSG00000167034/ENSG00000153094/ENSG00000115758/ENSG00000109906/ENSG00000137834/ENSG00000162599
GO:0072001	renal system development	11	-0.384878	-1.51226	0.0644264	0.419052	0.380282	140	tags=91%, list=50%, signal=47%	ENSG00000104267/ENSG00000166923/ENSG00000164736/ENSG00000101384/ENSG00000167034/ENSG00000153094/ENSG00000115758/ENSG00000109906/ENSG00000137834/ENSG00000162599
GO:0070665	positive regulation of leukocyte proliferation	13	0.489087	1.49845	0.0647399	0.420533	0.381627	113	tags=77%, list=41%, signal=48%	ENSG00000162692/ENSG00000125538/ENSG00000115008/ENSG00000136244/ENSG00000102524/ENSG00000168961/ENSG00000184371/ENSG00000104312/ENSG00000105639/ENSG00000110944
GO:0002467	germinal center formation	3	0.741818	1.40317	0.0648148	0.420533	0.381627	74	tags=100%, list=27%, signal=74%	ENSG00000102524/ENSG00000118503/ENSG00000077150
GO:0002283	neutrophil activation involved in immune response	19	0.438857	1.47514	0.0653595	0.422078	0.383028	68	tags=47%, list=24%, signal=38%	ENSG00000123610/ENSG00000163739/ENSG00000137462/ENSG00000163131/ENSG00000151651/ENSG00000163661/ENSG00000125730/ENSG00000096696/ENSG00000171236
GO:0043312	neutrophil degranulation	19	0.438857	1.47514	0.0653595	0.422078	0.383028	68	tags=47%, list=24%, signal=38%	ENSG00000123610/ENSG00000163739/ENSG00000137462/ENSG00000163131/ENSG00000151651/ENSG00000163661/ENSG00000125730/ENSG00000096696/ENSG00000171236
GO:0030258	lipid modification	2	-0.833333	-1.47311	0.0653753	0.422078	0.383028	49	tags=100%, list=18%, signal=83%	ENSG00000169047
GO:0045786	negative regulation of cell cycle	10	0.530998	1.49918	0.0653753	0.422078	0.383028	9	tags=30%, list=3%, signal=30%	ENSG00000169429/ENSG00000232810/ENSG00000108691
GO:0072593	reactive oxygen species metabolic process	14	0.474953	1.48048	0.0655172	0.422473	0.383387	65	tags=50%, list=23%, signal=40%	ENSG00000232810/ENSG00000125538/ENSG00000137462/ENSG00000112096/ENSG00000163661/ENSG00000090339/ENSG00000163874
GO:0090087	regulation of peptide transport	22	0.424455	1.46621	0.0658747	0.424256	0.385005	70	tags=45%, list=25%, signal=37%	ENSG00000232810/ENSG00000125538/ENSG00000115008/ENSG00000136244/ENSG00000137462/ENSG00000151651/ENSG00000166523/ENSG00000173432/ENSG00000163874/ENSG00000064651
GO:0050829	defense response to Gram-negative bacterium	3	0.73892	1.39769	0.066358	0.426844	0.387353	29	tags=67%, list=10%, signal=60%	ENSG00000124875/ENSG00000136244
GO:0030198	extracellular matrix organization	22	0.422467	1.45934	0.0669546	0.429626	0.389878	81	tags=50%, list=29%, signal=38%	ENSG00000232810/ENSG00000162692/ENSG00000136244/ENSG00000058085/ENSG00000163131/ENSG00000151651/ENSG00000196878/ENSG00000163661/ENSG00000090339/ENSG00000077150/ENSG00000154175
GO:0043062	extracellular structure organization	22	0.422467	1.45934	0.0669546	0.429626	0.389878	81	tags=50%, list=29%, signal=38%	ENSG00000232810/ENSG00000162692/ENSG00000136244/ENSG00000058085/ENSG00000163131/ENSG00000151651/ENSG00000196878/ENSG00000163661/ENSG00000090339/ENSG00000077150/ENSG00000154175
GO:0009914	hormone transport	12	0.497982	1.47145	0.0675355	0.43157	0.391642	29	tags=33%, list=10%, signal=31%	ENSG00000232810/ENSG00000136689/ENSG00000125538/ENSG00000136244
GO:0046879	hormone secretion	12	0.497982	1.47145	0.0675355	0.43157	0.391642	29	tags=33%, list=10%, signal=31%	ENSG00000232810/ENSG00000136689/ENSG00000125538/ENSG00000136244
GO:0016064	immunoglobulin mediated immune response	6	0.614115	1.47585	0.068	0.43157	0.391642	58	tags=67%, list=21%, signal=54%	ENSG00000232810/ENSG00000028277/ENSG00000226979/ENSG00000125730
GO:0019724	B cell mediated immunity	6	0.614115	1.47585	0.068	0.43157	0.391642	58	tags=67%, list=21%, signal=54%	ENSG00000232810/ENSG00000028277/ENSG00000226979/ENSG00000125730
GO:0032729	positive regulation of interferon-gamma production	6	0.612678	1.47239	0.068	0.43157	0.391642	57	tags=67%, list=21%, signal=54%	ENSG00000232810/ENSG00000125538/ENSG00000226979/ENSG00000168961
GO:0050808	synapse organization	7	0.588753	1.49934	0.0681234	0.43157	0.391642	58	tags=57%, list=21%, signal=46%	ENSG00000232810/ENSG00000006210/ENSG00000137462/ENSG00000125730
GO:0030968	endoplasmic reticulum unfolded protein response	5	0.658873	1.49631	0.0683403	0.43157	0.391642	9	tags=40%, list=3%, signal=39%	ENSG00000169429/ENSG00000108691
GO:0034620	cellular response to unfolded protein	5	0.658873	1.49631	0.0683403	0.43157	0.391642	9	tags=40%, list=3%, signal=39%	ENSG00000169429/ENSG00000108691
GO:0035967	cellular response to topologically incorrect protein	5	0.658873	1.49631	0.0683403	0.43157	0.391642	9	tags=40%, list=3%, signal=39%	ENSG00000169429/ENSG00000108691
GO:0042116	macrophage activation	12	0.496352	1.46664	0.0687204	0.43157	0.391642	33	tags=33%, list=12%, signal=31%	ENSG00000232810/ENSG00000006210/ENSG00000136244/ENSG00000137462
GO:0003014	renal system process	1	-0.963899	-1.29968	0.0692464	0.43157	0.391642	12	tags=100%, list=4%, signal=96%
GO:0007194	negative regulation of adenylate cyclase activity	1	-0.963899	-1.29968	0.0692464	0.43157	0.391642	12	tags=100%, list=4%, signal=96%
GO:0007200	phospholipase C-activating G protein-coupled receptor signaling pathway	1	-0.963899	-1.29968	0.0692464	0.43157	0.391642	12	tags=100%, list=4%, signal=96%
GO:0030157	pancreatic juice secretion	1	-0.963899	-1.29968	0.0692464	0.43157	0.391642	12	tags=100%, list=4%, signal=96%
GO:0030322	stabilization of membrane potential	1	-0.967509	-1.30455	0.0692464	0.43157	0.391642	11	tags=100%, list=4%, signal=96%
GO:0031279	regulation of cyclase activity	1	-0.963899	-1.29968	0.0692464	0.43157	0.391642	12	tags=100%, list=4%, signal=96%
GO:0031280	negative regulation of cyclase activity	1	-0.963899	-1.29968	0.0692464	0.43157	0.391642	12	tags=100%, list=4%, signal=96%
GO:0032941	secretion by tissue	1	-0.963899	-1.29968	0.0692464	0.43157	0.391642	12	tags=100%, list=4%, signal=96%
GO:0035809	regulation of urine volume	1	-0.963899	-1.29968	0.0692464	0.43157	0.391642	12	tags=100%, list=4%, signal=96%
GO:0035810	positive regulation of urine volume	1	-0.963899	-1.29968	0.0692464	0.43157	0.391642	12	tags=100%, list=4%, signal=96%
GO:0045761	regulation of adenylate cyclase activity	1	-0.963899	-1.29968	0.0692464	0.43157	0.391642	12	tags=100%, list=4%, signal=96%
GO:0051339	regulation of lyase activity	1	-0.963899	-1.29968	0.0692464	0.43157	0.391642	12	tags=100%, list=4%, signal=96%
GO:0051350	negative regulation of lyase activity	1	-0.963899	-1.29968	0.0692464	0.43157	0.391642	12	tags=100%, list=4%, signal=96%
GO:2000379	positive regulation of reactive oxygen species metabolic process	8	0.560806	1.49271	0.0693569	0.43157	0.391642	65	tags=62%, list=23%, signal=49%	ENSG00000232810/ENSG00000125538/ENSG00000163661/ENSG00000090339/ENSG00000163874
GO:0048699	generation of neurons	34	0.388809	1.45025	0.0694006	0.43157	0.391642	72	tags=41%, list=26%, signal=35%	ENSG00000232810/ENSG00000006210/ENSG00000204482/ENSG00000125538/ENSG00000135919/ENSG00000136244/ENSG00000153993/ENSG00000137462/ENSG00000058085/ENSG00000075213/ENSG00000226979/ENSG00000125730/ENSG00000138411/ENSG00000122641
GO:0051130	positive regulation of cellular component organization	34	0.389471	1.45273	0.0694006	0.43157	0.391642	62	tags=35%, list=22%, signal=31%	ENSG00000007908/ENSG00000232810/ENSG00000006210/ENSG00000108342/ENSG00000125538/ENSG00000115008/ENSG00000136244/ENSG00000154451/ENSG00000067798/ENSG00000125730/ENSG00000090339/ENSG00000163132
GO:0002676	regulation of chronic inflammatory response	4	0.707302	1.47021	0.0696662	0.432109	0.392132	52	tags=75%, list=19%, signal=62%	ENSG00000232810/ENSG00000118503/ENSG00000226979
GO:0030225	macrophage differentiation	4	0.708029	1.47172	0.0696662	0.432109	0.392132	84	tags=100%, list=30%, signal=71%	ENSG00000137462/ENSG00000173334/ENSG00000122641/ENSG00000184371
GO:0006509	membrane protein ectodomain proteolysis	5	0.656689	1.49135	0.069735	0.432109	0.392132	43	tags=60%, list=15%, signal=52%	ENSG00000232810/ENSG00000125538/ENSG00000151651
GO:0032732	positive regulation of interleukin-1 production	6	0.61085	1.468	0.0706667	0.436275	0.395912	61	tags=67%, list=22%, signal=53%	ENSG00000232810/ENSG00000136244/ENSG00000168961/ENSG00000173432
GO:0019220	regulation of phosphate metabolic process	63	0.335925	1.38203	0.0709939	0.436275	0.395912	72	tags=37%, list=26%, signal=35%	ENSG00000232810/ENSG00000006210/ENSG00000108691/ENSG00000115009/ENSG00000108342/ENSG00000169245/ENSG00000125538/ENSG00000162892/ENSG00000136244/ENSG00000056558/ENSG00000151651/ENSG00000118503/ENSG00000075213/ENSG00000134070/ENSG00000168961/ENSG00000125730/ENSG00000090339/ENSG00000173432/ENSG00000120875/ENSG00000163874/ENSG00000173334/ENSG00000138675/ENSG00000122641
GO:0045595	regulation of cell differentiation	63	0.33416	1.37477	0.0709939	0.436275	0.395912	73	tags=37%, list=26%, signal=35%	ENSG00000232810/ENSG00000006210/ENSG00000134363/ENSG00000108342/ENSG00000169245/ENSG00000125538/ENSG00000135919/ENSG00000115008/ENSG00000136244/ENSG00000153993/ENSG00000137462/ENSG00000151651/ENSG00000168685/ENSG00000112096/ENSG00000075213/ENSG00000226979/ENSG00000168961/ENSG00000163132/ENSG00000163874/ENSG00000173334/ENSG00000138411/ENSG00000122641/ENSG00000161940
GO:0051174	regulation of phosphorus metabolic process	63	0.335925	1.38203	0.0709939	0.436275	0.395912	72	tags=37%, list=26%, signal=35%	ENSG00000232810/ENSG00000006210/ENSG00000108691/ENSG00000115009/ENSG00000108342/ENSG00000169245/ENSG00000125538/ENSG00000162892/ENSG00000136244/ENSG00000056558/ENSG00000151651/ENSG00000118503/ENSG00000075213/ENSG00000134070/ENSG00000168961/ENSG00000125730/ENSG00000090339/ENSG00000173432/ENSG00000120875/ENSG00000163874/ENSG00000173334/ENSG00000138675/ENSG00000122641
GO:0002275	myeloid cell activation involved in immune response	22	0.420583	1.45283	0.0712743	0.436275	0.395912	68	tags=45%, list=24%, signal=37%	ENSG00000123610/ENSG00000163739/ENSG00000137462/ENSG00000163131/ENSG00000151651/ENSG00000163661/ENSG00000168961/ENSG00000125730/ENSG00000096696/ENSG00000171236
GO:1901222	regulation of NIK/NF-kappaB signaling	9	0.543111	1.48642	0.0714286	0.436275	0.395912	65	tags=56%, list=23%, signal=44%	ENSG00000232810/ENSG00000125538/ENSG00000137462/ENSG00000168961/ENSG00000163874
GO:0034350	regulation of glial cell apoptotic process	1	0.971119	1.28887	0.072407	0.436275	0.395912	9	tags=100%, list=3%, signal=97%	ENSG00000108691
GO:0034351	negative regulation of glial cell apoptotic process	1	0.971119	1.28887	0.072407	0.436275	0.395912	9	tags=100%, list=3%, signal=97%	ENSG00000108691
GO:0035684	helper T cell extravasation	1	0.971119	1.28887	0.072407	0.436275	0.395912	9	tags=100%, list=3%, signal=97%	ENSG00000108691
GO:0043615	astrocyte cell migration	1	0.971119	1.28887	0.072407	0.436275	0.395912	9	tags=100%, list=3%, signal=97%	ENSG00000108691
GO:0051968	positive regulation of synaptic transmission, glutamatergic	1	0.971119	1.28887	0.072407	0.436275	0.395912	9	tags=100%, list=3%, signal=97%	ENSG00000108691
GO:0090280	positive regulation of calcium ion import	1	0.971119	1.28887	0.072407	0.436275	0.395912	9	tags=100%, list=3%, signal=97%	ENSG00000108691
GO:0099601	regulation of neurotransmitter receptor activity	1	0.971119	1.28887	0.072407	0.436275	0.395912	9	tags=100%, list=3%, signal=97%	ENSG00000108691
GO:1900451	positive regulation of glutamate receptor signaling pathway	1	0.971119	1.28887	0.072407	0.436275	0.395912	9	tags=100%, list=3%, signal=97%	ENSG00000108691
GO:1901624	negative regulation of lymphocyte chemotaxis	1	0.971119	1.28887	0.072407	0.436275	0.395912	9	tags=100%, list=3%, signal=97%	ENSG00000108691
GO:1902806	regulation of cell cycle G1/S phase transition	1	0.971119	1.28887	0.072407	0.436275	0.395912	9	tags=100%, list=3%, signal=97%	ENSG00000108691
GO:1902807	negative regulation of cell cycle G1/S phase transition	1	0.971119	1.28887	0.072407	0.436275	0.395912	9	tags=100%, list=3%, signal=97%	ENSG00000108691
GO:1904783	positive regulation of NMDA glutamate receptor activity	1	0.971119	1.28887	0.072407	0.436275	0.395912	9	tags=100%, list=3%, signal=97%	ENSG00000108691
GO:1905563	negative regulation of vascular endothelial cell proliferation	1	0.971119	1.28887	0.072407	0.436275	0.395912	9	tags=100%, list=3%, signal=97%	ENSG00000108691
GO:2000045	regulation of G1/S transition of mitotic cell cycle	1	0.971119	1.28887	0.072407	0.436275	0.395912	9	tags=100%, list=3%, signal=97%	ENSG00000108691
GO:2000134	negative regulation of G1/S transition of mitotic cell cycle	1	0.971119	1.28887	0.072407	0.436275	0.395912	9	tags=100%, list=3%, signal=97%	ENSG00000108691
GO:2000310	regulation of NMDA receptor activity	1	0.971119	1.28887	0.072407	0.436275	0.395912	9	tags=100%, list=3%, signal=97%	ENSG00000108691
GO:2000402	negative regulation of lymphocyte migration	1	0.971119	1.28887	0.072407	0.436275	0.395912	9	tags=100%, list=3%, signal=97%	ENSG00000108691
GO:2000502	negative regulation of natural killer cell chemotaxis	1	0.971119	1.28887	0.072407	0.436275	0.395912	9	tags=100%, list=3%, signal=97%	ENSG00000108691
GO:0000003	reproduction	32	0.394859	1.44684	0.0727081	0.437083	0.396646	91	tags=53%, list=33%, signal=40%	ENSG00000123610/ENSG00000134363/ENSG00000125538/ENSG00000135919/ENSG00000115008/ENSG00000075213/ENSG00000163661/ENSG00000168961/ENSG00000090339/ENSG00000163132/ENSG00000122641/ENSG00000091879/ENSG00000113739/ENSG00000121858/ENSG00000184371/ENSG00000023445/ENSG00000112972
GO:0022414	reproductive process	32	0.394859	1.44684	0.0727081	0.437083	0.396646	91	tags=53%, list=33%, signal=40%	ENSG00000123610/ENSG00000134363/ENSG00000125538/ENSG00000135919/ENSG00000115008/ENSG00000075213/ENSG00000163661/ENSG00000168961/ENSG00000090339/ENSG00000163132/ENSG00000122641/ENSG00000091879/ENSG00000113739/ENSG00000121858/ENSG00000184371/ENSG00000023445/ENSG00000112972
GO:0007260	tyrosine phosphorylation of STAT protein	7	0.582281	1.48286	0.0732648	0.438827	0.398228	29	tags=43%, list=10%, signal=39%	ENSG00000232810/ENSG00000162892/ENSG00000136244
GO:0046425	regulation of receptor signaling pathway via JAK-STAT	7	0.582281	1.48286	0.0732648	0.438827	0.398228	29	tags=43%, list=10%, signal=39%	ENSG00000232810/ENSG00000162892/ENSG00000136244
GO:0043370	regulation of CD4-positive, alpha-beta T cell differentiation	6	0.606618	1.45783	0.0733333	0.438827	0.398228	113	tags=100%, list=41%, signal=61%	ENSG00000168961/ENSG00000163874/ENSG00000104312/ENSG00000144802/ENSG00000105639/ENSG00000110944
GO:2000514	regulation of CD4-positive, alpha-beta T cell activation	6	0.606618	1.45783	0.0733333	0.438827	0.398228	113	tags=100%, list=41%, signal=61%	ENSG00000168961/ENSG00000163874/ENSG00000104312/ENSG00000144802/ENSG00000105639/ENSG00000110944
GO:0002697	regulation of immune effector process	27	0.410926	1.46192	0.0737179	0.44033	0.399592	116	tags=67%, list=42%, signal=43%	ENSG00000232810/ENSG00000124875/ENSG00000125538/ENSG00000136244/ENSG00000118503/ENSG00000168685/ENSG00000226979/ENSG00000168961/ENSG00000125730/ENSG00000090339/ENSG00000163874/ENSG00000023445/ENSG00000104312/ENSG00000144802/ENSG00000182326/ENSG00000105639/ENSG00000110944/ENSG00000204642
GO:0060284	regulation of cell development	25	0.416967	1.45908	0.0737527	0.44033	0.399592	71	tags=44%, list=26%, signal=36%	ENSG00000232810/ENSG00000006210/ENSG00000125538/ENSG00000135919/ENSG00000136244/ENSG00000153993/ENSG00000137462/ENSG00000075213/ENSG00000226979/ENSG00000173334/ENSG00000138411
GO:0051128	regulation of cellular component organization	53	0.346827	1.39364	0.0743381	0.442567	0.401622	72	tags=36%, list=26%, signal=33%	ENSG00000007908/ENSG00000232810/ENSG00000006210/ENSG00000108342/ENSG00000169245/ENSG00000125538/ENSG00000135919/ENSG00000115008/ENSG00000136244/ENSG00000153993/ENSG00000137462/ENSG00000154451/ENSG00000075213/ENSG00000067798/ENSG00000125730/ENSG00000090339/ENSG00000163132/ENSG00000138411/ENSG00000122641
GO:0034599	cellular response to oxidative stress	8	0.556334	1.4808	0.074401	0.442567	0.401622	65	tags=62%, list=23%, signal=49%	ENSG00000232810/ENSG00000136244/ENSG00000118503/ENSG00000112096/ENSG00000163874
GO:0046328	regulation of JNK cascade	8	0.55678	1.48199	0.074401	0.442567	0.401622	51	tags=50%, list=18%, signal=42%	ENSG00000232810/ENSG00000125538/ENSG00000056558/ENSG00000075213
GO:0002700	regulation of production of molecular mediator of immune response	7	0.580719	1.47888	0.0745501	0.442567	0.401622	29	tags=43%, list=10%, signal=39%	ENSG00000232810/ENSG00000125538/ENSG00000136244
GO:0002718	regulation of cytokine production involved in immune response	7	0.580719	1.47888	0.0745501	0.442567	0.401622	29	tags=43%, list=10%, signal=39%	ENSG00000232810/ENSG00000125538/ENSG00000136244
GO:0016310	phosphorylation	66	0.335134	1.38679	0.0749747	0.444584	0.403452	72	tags=36%, list=26%, signal=35%	ENSG00000232810/ENSG00000006210/ENSG00000108691/ENSG00000115009/ENSG00000108342/ENSG00000169245/ENSG00000125538/ENSG00000162892/ENSG00000136244/ENSG00000137462/ENSG00000056558/ENSG00000151651/ENSG00000118503/ENSG00000075213/ENSG00000134070/ENSG00000168961/ENSG00000125730/ENSG00000090339/ENSG00000173432/ENSG00000120875/ENSG00000163874/ENSG00000173334/ENSG00000138675/ENSG00000122641
GO:0065003	protein-containing complex assembly	24	0.415794	1.45775	0.075188	0.445344	0.404142	65	tags=42%, list=23%, signal=35%	ENSG00000232810/ENSG00000006210/ENSG00000108342/ENSG00000159261/ENSG00000056558/ENSG00000154451/ENSG00000112096/ENSG00000067798/ENSG00000090339/ENSG00000163874
GO:0045834	positive regulation of lipid metabolic process	5	0.650418	1.47711	0.0753138	0.445585	0.404361	20	tags=40%, list=7%, signal=38%	ENSG00000232810/ENSG00000125538
GO:0050803	regulation of synapse structure or activity	3	0.735925	1.39202	0.0756173	0.446241	0.404956	33	tags=67%, list=12%, signal=59%	ENSG00000232810/ENSG00000137462
GO:0007399	nervous system development	54	0.343748	1.3899	0.0759878	0.446241	0.404956	72	tags=37%, list=26%, signal=34%	ENSG00000232810/ENSG00000006210/ENSG00000108691/ENSG00000204482/ENSG00000163739/ENSG00000125538/ENSG00000135919/ENSG00000136244/ENSG00000153993/ENSG00000137462/ENSG00000058085/ENSG00000075213/ENSG00000226979/ENSG00000067798/ENSG00000125730/ENSG00000163132/ENSG00000163874/ENSG00000138675/ENSG00000138411/ENSG00000122641
GO:0031331	positive regulation of cellular catabolic process	15	0.457758	1.45279	0.0763098	0.446241	0.404956	67	tags=47%, list=24%, signal=37%	ENSG00000232810/ENSG00000125538/ENSG00000136244/ENSG00000151651/ENSG00000118503/ENSG00000163874/ENSG00000173334
GO:0055114	oxidation-reduction process	12	0.492882	1.45638	0.0770142	0.446241	0.404956	50	tags=42%, list=18%, signal=36%	ENSG00000162692/ENSG00000104951/ENSG00000166920/ENSG00000211448/ENSG00000112096
GO:0019725	cellular homeostasis	19	0.43268	1.45438	0.077342	0.446241	0.404956	85	tags=53%, list=31%, signal=39%	ENSG00000006210/ENSG00000108691/ENSG00000169245/ENSG00000169248/ENSG00000136244/ENSG00000090339/ENSG00000173432/ENSG00000064651/ENSG00000113739/ENSG00000123700
GO:0001886	endothelial cell morphogenesis	1	-0.960289	-1.29482	0.0773931	0.446241	0.404956	13	tags=100%, list=5%, signal=96%
GO:0003382	epithelial cell morphogenesis	1	-0.960289	-1.29482	0.0773931	0.446241	0.404956	13	tags=100%, list=5%, signal=96%
GO:0010621	negative regulation of transcription by transcription factor localization	1	-0.960289	-1.29482	0.0773931	0.446241	0.404956	13	tags=100%, list=5%, signal=96%
GO:0036164	cell-abiotic substrate adhesion	1	-0.960289	-1.29482	0.0773931	0.446241	0.404956	13	tags=100%, list=5%, signal=96%
GO:0046677	response to antibiotic	1	-0.960289	-1.29482	0.0773931	0.446241	0.404956	13	tags=100%, list=5%, signal=96%
GO:0050774	negative regulation of dendrite morphogenesis	1	-0.960289	-1.29482	0.0773931	0.446241	0.404956	13	tags=100%, list=5%, signal=96%
GO:0060426	lung vasculature development	1	-0.960289	-1.29482	0.0773931	0.446241	0.404956	13	tags=100%, list=5%, signal=96%
GO:0070849	response to epidermal growth factor	1	-0.960289	-1.29482	0.0773931	0.446241	0.404956	13	tags=100%, list=5%, signal=96%
GO:0071364	cellular response to epidermal growth factor stimulus	1	-0.960289	-1.29482	0.0773931	0.446241	0.404956	13	tags=100%, list=5%, signal=96%
GO:0071867	response to monoamine	1	-0.960289	-1.29482	0.0773931	0.446241	0.404956	13	tags=100%, list=5%, signal=96%
GO:0071868	cellular response to monoamine stimulus	1	-0.960289	-1.29482	0.0773931	0.446241	0.404956	13	tags=100%, list=5%, signal=96%
GO:0071869	response to catecholamine	1	-0.960289	-1.29482	0.0773931	0.446241	0.404956	13	tags=100%, list=5%, signal=96%
GO:0071870	cellular response to catecholamine stimulus	1	-0.960289	-1.29482	0.0773931	0.446241	0.404956	13	tags=100%, list=5%, signal=96%
GO:1903350	response to dopamine	1	-0.960289	-1.29482	0.0773931	0.446241	0.404956	13	tags=100%, list=5%, signal=96%
GO:1903351	cellular response to dopamine	1	-0.960289	-1.29482	0.0773931	0.446241	0.404956	13	tags=100%, list=5%, signal=96%
GO:1990089	response to nerve growth factor	1	-0.960289	-1.29482	0.0773931	0.446241	0.404956	13	tags=100%, list=5%, signal=96%
GO:1990090	cellular response to nerve growth factor stimulus	1	-0.960289	-1.29482	0.0773931	0.446241	0.404956	13	tags=100%, list=5%, signal=96%
GO:2000171	negative regulation of dendrite development	1	-0.960289	-1.29482	0.0773931	0.446241	0.404956	13	tags=100%, list=5%, signal=96%
GO:0098655	cation transmembrane transport	18	0.436051	1.44972	0.0775956	0.446241	0.404956	39	tags=33%, list=14%, signal=31%	ENSG00000006210/ENSG00000108691/ENSG00000169245/ENSG00000166920/ENSG00000169248/ENSG00000163131
GO:0031349	positive regulation of defense response	29	0.399521	1.447	0.0779768	0.446241	0.404956	59	tags=38%, list=21%, signal=33%	ENSG00000232810/ENSG00000006210/ENSG00000125538/ENSG00000136244/ENSG00000137462/ENSG00000154451/ENSG00000151651/ENSG00000166523/ENSG00000226979/ENSG00000125730/ENSG00000104856
GO:0051641	cellular localization	58	0.336063	1.37049	0.0780142	0.446241	0.404956	68	tags=34%, list=24%, signal=33%	ENSG00000123610/ENSG00000232810/ENSG00000006210/ENSG00000163739/ENSG00000169245/ENSG00000125538/ENSG00000169248/ENSG00000137462/ENSG00000163131/ENSG00000185215/ENSG00000154451/ENSG00000151651/ENSG00000118503/ENSG00000163661/ENSG00000168961/ENSG00000125730/ENSG00000163132/ENSG00000163874/ENSG00000096696/ENSG00000171236
GO:0009895	negative regulation of catabolic process	8	0.553809	1.47408	0.0781841	0.446241	0.404956	23	tags=38%, list=8%, signal=35%	ENSG00000232810/ENSG00000125538/ENSG00000135919
GO:1904892	regulation of receptor signaling pathway via STAT	8	0.554192	1.4751	0.0781841	0.446241	0.404956	49	tags=50%, list=18%, signal=42%	ENSG00000232810/ENSG00000162892/ENSG00000136244/ENSG00000168685
GO:0031069	hair follicle morphogenesis	1	0.967509	1.28408	0.0782779	0.446241	0.404956	10	tags=100%, list=4%, signal=97%	ENSG00000134363
GO:0032925	regulation of activin receptor signaling pathway	1	0.967509	1.28408	0.0782779	0.446241	0.404956	10	tags=100%, list=4%, signal=97%	ENSG00000134363
GO:0032926	negative regulation of activin receptor signaling pathway	1	0.967509	1.28408	0.0782779	0.446241	0.404956	10	tags=100%, list=4%, signal=97%	ENSG00000134363
GO:0043616	keratinocyte proliferation	1	0.967509	1.28408	0.0782779	0.446241	0.404956	10	tags=100%, list=4%, signal=97%	ENSG00000134363
GO:0048730	epidermis morphogenesis	1	0.967509	1.28408	0.0782779	0.446241	0.404956	10	tags=100%, list=4%, signal=97%	ENSG00000134363
GO:0051046	regulation of secretion	24	0.413453	1.44954	0.0784103	0.446241	0.404956	72	tags=46%, list=26%, signal=37%	ENSG00000232810/ENSG00000125538/ENSG00000115008/ENSG00000136244/ENSG00000137462/ENSG00000151651/ENSG00000166523/ENSG00000168961/ENSG00000173432/ENSG00000064651/ENSG00000122641
GO:1903530	regulation of secretion by cell	24	0.413453	1.44954	0.0784103	0.446241	0.404956	72	tags=46%, list=26%, signal=37%	ENSG00000232810/ENSG00000125538/ENSG00000115008/ENSG00000136244/ENSG00000137462/ENSG00000151651/ENSG00000166523/ENSG00000168961/ENSG00000173432/ENSG00000064651/ENSG00000122641
GO:0038061	NIK/NF-kappaB signaling	13	0.473807	1.45164	0.0786127	0.446241	0.404956	88	tags=62%, list=32%, signal=44%	ENSG00000232810/ENSG00000125538/ENSG00000137462/ENSG00000168961/ENSG00000104856/ENSG00000163874/ENSG00000077150/ENSG00000023445
GO:0046631	alpha-beta T cell activation	10	0.524175	1.47992	0.0786925	0.446241	0.404956	120	tags=90%, list=43%, signal=53%	ENSG00000136244/ENSG00000168961/ENSG00000104856/ENSG00000163874/ENSG00000104312/ENSG00000144802/ENSG00000105639/ENSG00000110944/ENSG00000125347
GO:0046632	alpha-beta T cell differentiation	10	0.524175	1.47992	0.0786925	0.446241	0.404956	120	tags=90%, list=43%, signal=53%	ENSG00000136244/ENSG00000168961/ENSG00000104856/ENSG00000163874/ENSG00000104312/ENSG00000144802/ENSG00000105639/ENSG00000110944/ENSG00000125347
GO:0023061	signal release	20	0.430681	1.4627	0.0788337	0.446241	0.404956	45	tags=35%, list=16%, signal=32%	ENSG00000232810/ENSG00000136689/ENSG00000125538/ENSG00000115008/ENSG00000136244/ENSG00000137462/ENSG00000166523
GO:0043299	leukocyte degranulation	22	0.416826	1.43986	0.0788337	0.446241	0.404956	68	tags=45%, list=24%, signal=37%	ENSG00000123610/ENSG00000163739/ENSG00000137462/ENSG00000163131/ENSG00000151651/ENSG00000163661/ENSG00000168961/ENSG00000125730/ENSG00000096696/ENSG00000171236
GO:0032680	regulation of tumor necrosis factor production	8	0.55005	1.46408	0.0794451	0.448706	0.407193	65	tags=62%, list=23%, signal=49%	ENSG00000006210/ENSG00000137462/ENSG00000118503/ENSG00000168961/ENSG00000163874
GO:0150079	negative regulation of neuroinflammatory response	2	0.802392	1.31383	0.0795262	0.448706	0.407193	6	tags=50%, list=2%, signal=49%	ENSG00000006210
GO:1903979	negative regulation of microglial cell activation	2	0.802392	1.31383	0.0795262	0.448706	0.407193	6	tags=50%, list=2%, signal=49%	ENSG00000006210
GO:0008360	regulation of cell shape	4	0.696834	1.44845	0.0798258	0.449428	0.407848	60	tags=75%, list=22%, signal=60%	ENSG00000108691/ENSG00000204482/ENSG00000090339
GO:0052372	modulation by symbiont of entry into host	4	0.696512	1.44778	0.0798258	0.449428	0.407848	57	tags=75%, list=21%, signal=60%	ENSG00000169429/ENSG00000163661/ENSG00000168961
GO:0051726	regulation of cell cycle	20	0.429137	1.45745	0.0799136	0.449439	0.407858	72	tags=45%, list=26%, signal=36%	ENSG00000169429/ENSG00000232810/ENSG00000108691/ENSG00000125538/ENSG00000115008/ENSG00000118503/ENSG00000163132/ENSG00000138411/ENSG00000122641
GO:0032872	regulation of stress-activated MAPK cascade	9	0.534131	1.46184	0.0802005	0.450568	0.408883	65	tags=56%, list=23%, signal=44%	ENSG00000232810/ENSG00000125538/ENSG00000056558/ENSG00000075213/ENSG00000163874
GO:0050830	defense response to Gram-positive bacterium	8	0.548239	1.45926	0.0807062	0.452923	0.41102	52	tags=50%, list=19%, signal=42%	ENSG00000232810/ENSG00000136244/ENSG00000137462/ENSG00000226979
GO:0016358	dendrite development	5	0.644705	1.46413	0.0808926	0.453484	0.411528	71	tags=80%, list=26%, signal=61%	ENSG00000204482/ENSG00000058085/ENSG00000075213/ENSG00000138411
GO:0043525	positive regulation of neuron apoptotic process	2	0.801669	1.31265	0.0812183	0.454336	0.412302	5	tags=50%, list=2%, signal=49%	ENSG00000232810
GO:1901216	positive regulation of neuron death	2	0.801669	1.31265	0.0812183	0.454336	0.412302	5	tags=50%, list=2%, signal=49%	ENSG00000232810
GO:0000302	response to reactive oxygen species	7	0.57588	1.46656	0.0822622	0.459685	0.417156	50	tags=57%, list=18%, signal=48%	ENSG00000232810/ENSG00000136244/ENSG00000118503/ENSG00000112096
GO:0009968	negative regulation of signal transduction	43	0.359305	1.40378	0.0829918	0.463268	0.420407	67	tags=35%, list=24%, signal=31%	ENSG00000169429/ENSG00000232810/ENSG00000006210/ENSG00000134363/ENSG00000136689/ENSG00000125538/ENSG00000135919/ENSG00000115008/ENSG00000136244/ENSG00000118503/ENSG00000112096/ENSG00000090339/ENSG00000120875/ENSG00000163874/ENSG00000173334
GO:0120162	positive regulation of cold-induced thermogenesis	3	0.725612	1.37252	0.0833333	0.464679	0.421688	32	tags=67%, list=12%, signal=60%	ENSG00000123689/ENSG00000211448
GO:0071346	cellular response to interferon-gamma	21	0.420249	1.43602	0.0843243	0.469704	0.426249	60	tags=38%, list=22%, signal=32%	ENSG00000006210/ENSG00000162692/ENSG00000108691/ENSG00000115009/ENSG00000137462/ENSG00000154451/ENSG00000168961/ENSG00000090339
GO:0002369	T cell cytokine production	3	0.723344	1.36823	0.0848765	0.469782	0.426319	29	tags=67%, list=10%, signal=60%	ENSG00000125538/ENSG00000136244
GO:0002724	regulation of T cell cytokine production	3	0.723344	1.36823	0.0848765	0.469782	0.426319	29	tags=67%, list=10%, signal=60%	ENSG00000125538/ENSG00000136244
GO:0032743	positive regulation of interleukin-2 production	3	0.723482	1.36849	0.0848765	0.469782	0.426319	27	tags=67%, list=10%, signal=61%	ENSG00000125538/ENSG00000115008
GO:0033079	immature T cell proliferation	3	0.723482	1.36849	0.0848765	0.469782	0.426319	27	tags=67%, list=10%, signal=61%	ENSG00000125538/ENSG00000115008
GO:0033083	regulation of immature T cell proliferation	3	0.723482	1.36849	0.0848765	0.469782	0.426319	27	tags=67%, list=10%, signal=61%	ENSG00000125538/ENSG00000115008
GO:0033091	positive regulation of immature T cell proliferation	3	0.723482	1.36849	0.0848765	0.469782	0.426319	27	tags=67%, list=10%, signal=61%	ENSG00000125538/ENSG00000115008
GO:0060341	regulation of cellular localization	19	0.426429	1.43337	0.0849673	0.469788	0.426324	26	tags=26%, list=9%, signal=26%	ENSG00000232810/ENSG00000006210/ENSG00000169245/ENSG00000125538/ENSG00000169248
GO:0010628	positive regulation of gene expression	70	0.324213	1.35758	0.0855131	0.471511	0.427888	74	tags=36%, list=27%, signal=35%	ENSG00000227507/ENSG00000169429/ENSG00000232810/ENSG00000006210/ENSG00000108342/ENSG00000169245/ENSG00000125538/ENSG00000115008/ENSG00000136244/ENSG00000137462/ENSG00000028277/ENSG00000154451/ENSG00000151651/ENSG00000166523/ENSG00000168685/ENSG00000226979/ENSG00000168961/ENSG00000125730/ENSG00000104856/ENSG00000173432/ENSG00000163132/ENSG00000163874/ENSG00000138675/ENSG00000122641/ENSG00000077150
GO:0070838	divalent metal ion transport	13	0.470046	1.44011	0.0855491	0.471511	0.427888	26	tags=31%, list=9%, signal=29%	ENSG00000006210/ENSG00000108691/ENSG00000169245/ENSG00000169248
GO:0072511	divalent inorganic cation transport	13	0.470046	1.44011	0.0855491	0.471511	0.427888	26	tags=31%, list=9%, signal=29%	ENSG00000006210/ENSG00000108691/ENSG00000169245/ENSG00000169248
GO:0007204	positive regulation of cytosolic calcium ion concentration	8	0.544482	1.44926	0.0857503	0.471627	0.427993	26	tags=38%, list=9%, signal=35%	ENSG00000006210/ENSG00000169245/ENSG00000169248
GO:0051480	regulation of cytosolic calcium ion concentration	8	0.544482	1.44926	0.0857503	0.471627	0.427993	26	tags=38%, list=9%, signal=35%	ENSG00000006210/ENSG00000169245/ENSG00000169248
GO:0010035	response to inorganic substance	19	0.424161	1.42575	0.0860566	0.472815	0.429071	143	tags=84%, list=51%, signal=44%	ENSG00000232810/ENSG00000115008/ENSG00000136244/ENSG00000118503/ENSG00000112096/ENSG00000090339/ENSG00000163874/ENSG00000064651/ENSG00000112972/ENSG00000134954/ENSG00000175592/ENSG00000131979/ENSG00000137801/ENSG00000171223/ENSG00000104267/ENSG00000163347
GO:0007584	response to nutrient	6	0.596861	1.43438	0.0866667	0.475169	0.431208	91	tags=83%, list=33%, signal=57%	ENSG00000169245/ENSG00000101670/ENSG00000226979/ENSG00000113739/ENSG00000112972
GO:0033619	membrane protein proteolysis	6	0.596537	1.4336	0.0866667	0.475169	0.431208	43	tags=50%, list=15%, signal=43%	ENSG00000232810/ENSG00000125538/ENSG00000151651
GO:0051495	positive regulation of cytoskeleton organization	7	0.571744	1.45603	0.0874036	0.478708	0.43442	60	tags=57%, list=22%, signal=46%	ENSG00000006210/ENSG00000108342/ENSG00000067798/ENSG00000090339
GO:1902105	regulation of leukocyte differentiation	21	0.418265	1.42924	0.0875676	0.479105	0.43478	120	tags=71%, list=43%, signal=44%	ENSG00000232810/ENSG00000125538/ENSG00000115008/ENSG00000151651/ENSG00000168685/ENSG00000168961/ENSG00000163874/ENSG00000173334/ENSG00000122641/ENSG00000184371/ENSG00000104312/ENSG00000144802/ENSG00000105639/ENSG00000110944/ENSG00000125347
GO:0031348	negative regulation of defense response	12	0.48725	1.43974	0.0876777	0.479207	0.434872	65	tags=50%, list=23%, signal=40%	ENSG00000123610/ENSG00000006210/ENSG00000118503/ENSG00000168961/ENSG00000173432/ENSG00000163874
GO:0090066	regulation of anatomical structure size	13	0.468454	1.43524	0.0878613	0.47971	0.435328	70	tags=54%, list=25%, signal=42%	ENSG00000108342/ENSG00000153993/ENSG00000168685/ENSG00000112096/ENSG00000075213/ENSG00000090339/ENSG00000064651
GO:0001822	kidney development	10	-0.369789	-1.4183	0.0879875	0.479889	0.435491	140	tags=90%, list=50%, signal=46%	ENSG00000104267/ENSG00000166923/ENSG00000164736/ENSG00000101384/ENSG00000167034/ENSG00000153094/ENSG00000115758/ENSG00000109906/ENSG00000137834
GO:0043269	regulation of ion transport	24	0.407804	1.42974	0.0880773	0.479889	0.435491	85	tags=50%, list=31%, signal=38%	ENSG00000006210/ENSG00000108691/ENSG00000169245/ENSG00000125538/ENSG00000135919/ENSG00000169248/ENSG00000163131/ENSG00000090339/ENSG00000064651/ENSG00000138411/ENSG00000113739/ENSG00000123700
GO:0044087	regulation of cellular component biogenesis	22	0.410404	1.41767	0.0885529	0.481978	0.437387	60	tags=36%, list=22%, signal=31%	ENSG00000232810/ENSG00000006210/ENSG00000108342/ENSG00000125538/ENSG00000137462/ENSG00000154451/ENSG00000067798/ENSG00000090339
GO:0032268	regulation of cellular protein metabolic process	75	0.320029	1.33962	0.0887992	0.482817	0.438148	72	tags=35%, list=26%, signal=35%	ENSG00000232810/ENSG00000006210/ENSG00000108691/ENSG00000115009/ENSG00000108342/ENSG00000169245/ENSG00000125538/ENSG00000162892/ENSG00000135919/ENSG00000136244/ENSG00000105825/ENSG00000211448/ENSG00000056558/ENSG00000151651/ENSG00000118503/ENSG00000075213/ENSG00000134070/ENSG00000168961/ENSG00000125730/ENSG00000090339/ENSG00000173432/ENSG00000120875/ENSG00000163874/ENSG00000173334/ENSG00000138675…
GO:0060249	anatomical structure homeostasis	9	0.524663	1.43593	0.0889724	0.483083	0.438389	84	tags=67%, list=30%, signal=48%	ENSG00000006210/ENSG00000136244/ENSG00000151651/ENSG00000118503/ENSG00000064651/ENSG00000184371
GO:0006986	response to unfolded protein	6	0.592776	1.42457	0.0893333	0.483083	0.438389	9	tags=33%, list=3%, signal=33%	ENSG00000169429/ENSG00000108691
GO:0035966	response to topologically incorrect protein	6	0.592776	1.42457	0.0893333	0.483083	0.438389	9	tags=33%, list=3%, signal=33%	ENSG00000169429/ENSG00000108691
GO:0006493	protein O-linked glycosylation	1	-0.956679	-1.28995	0.089613	0.483083	0.438389	14	tags=100%, list=5%, signal=95%
GO:0016266	O-glycan processing	1	-0.956679	-1.28995	0.089613	0.483083	0.438389	14	tags=100%, list=5%, signal=95%
GO:0046513	ceramide biosynthetic process	2	0.797623	1.30603	0.0896785	0.483083	0.438389	5	tags=50%, list=2%, signal=49%	ENSG00000232810
GO:0071605	monocyte chemotactic protein-1 production	2	0.800725	1.3111	0.0896785	0.483083	0.438389	57	tags=100%, list=21%, signal=80%	ENSG00000125538/ENSG00000168961
GO:0071637	regulation of monocyte chemotactic protein-1 production	2	0.800725	1.3111	0.0896785	0.483083	0.438389	57	tags=100%, list=21%, signal=80%	ENSG00000125538/ENSG00000168961
GO:0071639	positive regulation of monocyte chemotactic protein-1 production	2	0.800725	1.3111	0.0896785	0.483083	0.438389	57	tags=100%, list=21%, signal=80%	ENSG00000125538/ENSG00000168961
GO:0006812	cation transport	24	0.406371	1.42472	0.0902256	0.48553	0.44061	85	tags=50%, list=31%, signal=38%	ENSG00000006210/ENSG00000108691/ENSG00000169245/ENSG00000135919/ENSG00000166920/ENSG00000169248/ENSG00000163131/ENSG00000090339/ENSG00000064651/ENSG00000138411/ENSG00000113739/ENSG00000123700
GO:0002532	production of molecular mediator involved in inflammatory response	7	0.565098	1.4391	0.0912596	0.486195	0.441214	65	tags=57%, list=23%, signal=45%	ENSG00000232810/ENSG00000136244/ENSG00000154451/ENSG00000163874
GO:0042982	amyloid precursor protein metabolic process	2	0.794331	1.30064	0.0913706	0.486195	0.441214	5	tags=50%, list=2%, signal=49%	ENSG00000232810
GO:0042987	amyloid precursor protein catabolic process	2	0.794331	1.30064	0.0913706	0.486195	0.441214	5	tags=50%, list=2%, signal=49%	ENSG00000232810
GO:0045917	positive regulation of complement activation	2	0.797101	1.30517	0.0913706	0.486195	0.441214	58	tags=100%, list=21%, signal=80%	ENSG00000125538/ENSG00000125730
GO:0060693	regulation of branching involved in salivary gland morphogenesis	2	0.79492	1.3016	0.0913706	0.486195	0.441214	5	tags=50%, list=2%, signal=49%	ENSG00000232810
GO:0098883	synapse pruning	2	0.797101	1.30517	0.0913706	0.486195	0.441214	58	tags=100%, list=21%, signal=80%	ENSG00000006210/ENSG00000125730
GO:0150146	cell junction disassembly	2	0.797101	1.30517	0.0913706	0.486195	0.441214	58	tags=100%, list=21%, signal=80%	ENSG00000006210/ENSG00000125730
GO:1902991	regulation of amyloid precursor protein catabolic process	2	0.794331	1.30064	0.0913706	0.486195	0.441214	5	tags=50%, list=2%, signal=49%	ENSG00000232810
GO:1902993	positive regulation of amyloid precursor protein catabolic process	2	0.794331	1.30064	0.0913706	0.486195	0.441214	5	tags=50%, list=2%, signal=49%	ENSG00000232810
GO:2000425	regulation of apoptotic cell clearance	2	0.797101	1.30517	0.0913706	0.486195	0.441214	58	tags=100%, list=21%, signal=80%	ENSG00000108691/ENSG00000125730
GO:2000427	positive regulation of apoptotic cell clearance	2	0.797101	1.30517	0.0913706	0.486195	0.441214	58	tags=100%, list=21%, signal=80%	ENSG00000108691/ENSG00000125730
GO:0009896	positive regulation of catabolic process	17	0.438364	1.43178	0.0920177	0.489142	0.443888	71	tags=47%, list=26%, signal=37%	ENSG00000232810/ENSG00000125538/ENSG00000136244/ENSG00000151651/ENSG00000118503/ENSG00000163874/ENSG00000173334/ENSG00000138411
GO:1905331	negative regulation of morphogenesis of an epithelium	2	0.790037	1.2936	0.0930626	0.494195	0.448473	5	tags=50%, list=2%, signal=49%	ENSG00000232810
GO:0002688	regulation of leukocyte chemotaxis	12	0.484104	1.43044	0.0936019	0.49564	0.449784	29	tags=33%, list=10%, signal=31%	ENSG00000169429/ENSG00000108691/ENSG00000169245/ENSG00000136244
GO:0032770	positive regulation of monooxygenase activity	4	0.675359	1.40381	0.0943396	0.49564	0.449784	20	tags=50%, list=7%, signal=47%	ENSG00000232810/ENSG00000125538
GO:0051353	positive regulation of oxidoreductase activity	4	0.675359	1.40381	0.0943396	0.49564	0.449784	20	tags=50%, list=7%, signal=47%	ENSG00000232810/ENSG00000125538
GO:0061028	establishment of endothelial barrier	4	0.677425	1.40811	0.0943396	0.49564	0.449784	60	tags=75%, list=22%, signal=60%	ENSG00000232810/ENSG00000125538/ENSG00000090339
GO:0032259	methylation	2	-0.800725	-1.41547	0.094431	0.49564	0.449784	58	tags=100%, list=21%, signal=80%	ENSG00000185432
GO:0002291	T cell activation via T cell receptor contact with antigen bound to MHC molecule on antigen presenting cell	2	0.789855	1.29331	0.0947547	0.49564	0.449784	60	tags=100%, list=22%, signal=79%	ENSG00000168961/ENSG00000090339
GO:0002438	acute inflammatory response to antigenic stimulus	2	0.789855	1.29331	0.0947547	0.49564	0.449784	60	tags=100%, list=22%, signal=79%	ENSG00000125730/ENSG00000090339
GO:0008064	regulation of actin polymerization or depolymerization	2	0.789855	1.29331	0.0947547	0.49564	0.449784	60	tags=100%, list=22%, signal=79%	ENSG00000108342/ENSG00000090339
GO:0022406	membrane docking	2	0.789855	1.29331	0.0947547	0.49564	0.449784	60	tags=100%, list=22%, signal=79%	ENSG00000162692/ENSG00000090339
GO:0022614	membrane to membrane docking	2	0.789855	1.29331	0.0947547	0.49564	0.449784	60	tags=100%, list=22%, signal=79%	ENSG00000162692/ENSG00000090339
GO:0030832	regulation of actin filament length	2	0.789855	1.29331	0.0947547	0.49564	0.449784	60	tags=100%, list=22%, signal=79%	ENSG00000108342/ENSG00000090339
GO:0030833	regulation of actin filament polymerization	2	0.789855	1.29331	0.0947547	0.49564	0.449784	60	tags=100%, list=22%, signal=79%	ENSG00000108342/ENSG00000090339
GO:0030838	positive regulation of actin filament polymerization	2	0.789855	1.29331	0.0947547	0.49564	0.449784	60	tags=100%, list=22%, signal=79%	ENSG00000108342/ENSG00000090339
GO:0060664	epithelial cell proliferation involved in salivary gland morphogenesis	2	0.789207	1.29225	0.0947547	0.49564	0.449784	5	tags=50%, list=2%, signal=49%	ENSG00000232810
GO:0072683	T cell extravasation	2	0.789855	1.29331	0.0947547	0.49564	0.449784	60	tags=100%, list=22%, signal=79%	ENSG00000108691/ENSG00000090339
GO:0030183	B cell differentiation	7	0.559311	1.42436	0.0951157	0.497032	0.451048	110	tags=86%, list=40%, signal=53%	ENSG00000162692/ENSG00000136244/ENSG00000028277/ENSG00000122641/ENSG00000048052/ENSG00000105639
GO:0042176	regulation of protein catabolic process	14	0.455473	1.41976	0.0954023	0.498032	0.451956	71	tags=50%, list=26%, signal=39%	ENSG00000232810/ENSG00000125538/ENSG00000135919/ENSG00000151651/ENSG00000118503/ENSG00000173334/ENSG00000138411

## Sheet: GO Molecular function
ID	Description	setSize	enrichmentScore	NES	pvalue	p.adjust	qvalues	rank	leading_edge	core_enrichment
GO:0005126	cytokine receptor binding	29	0.744944	2.77043	1.19215e-10	8.91726e-08	8.80934e-08	44	tags=69%, list=16%, signal=65%	ENSG00000227507/ENSG00000169429/ENSG00000232810/ENSG00000006210/ENSG00000124875/ENSG00000108691/ENSG00000115009/ENSG00000136689/ENSG00000163739/ENSG00000108342/ENSG00000169245/ENSG00000163735/ENSG00000125538/ENSG00000169248/ENSG00000115008/ENSG00000136244/ENSG00000163734/ENSG00000056558/ENSG00000081041/ENSG00000102524
GO:0005125	cytokine activity	31	0.721153	2.70791	2.5466e-10	9.52427e-08	9.409e-08	44	tags=65%, list=16%, signal=61%	ENSG00000227507/ENSG00000169429/ENSG00000232810/ENSG00000006210/ENSG00000124875/ENSG00000108691/ENSG00000115009/ENSG00000136689/ENSG00000163739/ENSG00000108342/ENSG00000169245/ENSG00000163735/ENSG00000125538/ENSG00000162892/ENSG00000169248/ENSG00000115008/ENSG00000136244/ENSG00000163734/ENSG00000081041/ENSG00000102524
GO:0030545	receptor regulator activity	43	0.647054	2.541	4.99151e-09	1.24455e-06	1.22949e-06	52	tags=56%, list=19%, signal=54%	ENSG00000227507/ENSG00000169429/ENSG00000232810/ENSG00000006210/ENSG00000124875/ENSG00000108691/ENSG00000134363/ENSG00000115009/ENSG00000136689/ENSG00000163739/ENSG00000108342/ENSG00000169245/ENSG00000163735/ENSG00000125538/ENSG00000162892/ENSG00000169248/ENSG00000115008/ENSG00000136244/ENSG00000153993/ENSG00000163734/ENSG00000081041/ENSG00000102524/ENSG00000075213/ENSG00000226979
GO:0008009	chemokine activity	12	0.854818	2.56303	9.21333e-09	1.37831e-06	1.36163e-06	42	tags=92%, list=15%, signal=81%	ENSG00000169429/ENSG00000006210/ENSG00000124875/ENSG00000108691/ENSG00000115009/ENSG00000163739/ENSG00000169245/ENSG00000163735/ENSG00000169248/ENSG00000163734/ENSG00000081041
GO:0042379	chemokine receptor binding	12	0.854818	2.56303	9.21333e-09	1.37831e-06	1.36163e-06	42	tags=92%, list=15%, signal=81%	ENSG00000169429/ENSG00000006210/ENSG00000124875/ENSG00000108691/ENSG00000115009/ENSG00000163739/ENSG00000169245/ENSG00000163735/ENSG00000169248/ENSG00000163734/ENSG00000081041
GO:0030546	signaling receptor activator activity	41	0.642916	2.50552	4.24422e-08	4.53525e-06	4.48037e-06	52	tags=56%, list=19%, signal=53%	ENSG00000227507/ENSG00000169429/ENSG00000232810/ENSG00000006210/ENSG00000124875/ENSG00000108691/ENSG00000115009/ENSG00000136689/ENSG00000163739/ENSG00000108342/ENSG00000169245/ENSG00000163735/ENSG00000125538/ENSG00000162892/ENSG00000169248/ENSG00000115008/ENSG00000136244/ENSG00000153993/ENSG00000163734/ENSG00000081041/ENSG00000102524/ENSG00000075213/ENSG00000226979
GO:0048018	receptor ligand activity	41	0.642916	2.50552	4.24422e-08	4.53525e-06	4.48037e-06	52	tags=56%, list=19%, signal=53%	ENSG00000227507/ENSG00000169429/ENSG00000232810/ENSG00000006210/ENSG00000124875/ENSG00000108691/ENSG00000115009/ENSG00000136689/ENSG00000163739/ENSG00000108342/ENSG00000169245/ENSG00000163735/ENSG00000125538/ENSG00000162892/ENSG00000169248/ENSG00000115008/ENSG00000136244/ENSG00000153993/ENSG00000163734/ENSG00000081041/ENSG00000102524/ENSG00000075213/ENSG00000226979
GO:0045236	CXCR chemokine receptor binding	9	0.877323	2.37576	9.45404e-08	8.83953e-06	8.73255e-06	42	tags=100%, list=15%, signal=88%	ENSG00000169429/ENSG00000006210/ENSG00000124875/ENSG00000163739/ENSG00000169245/ENSG00000163735/ENSG00000169248/ENSG00000163734/ENSG00000081041
GO:0005102	signaling receptor binding	77	0.512931	2.12088	1.37004e-06	0.000113865	0.000112487	84	tags=52%, list=30%, signal=50%	ENSG00000227507/ENSG00000169429/ENSG00000232810/ENSG00000006210/ENSG00000124875/ENSG00000162692/ENSG00000108691/ENSG00000134363/ENSG00000115009/ENSG00000136689/ENSG00000163739/ENSG00000108342/ENSG00000169245/ENSG00000163735/ENSG00000125538/ENSG00000162892/ENSG00000135919/ENSG00000169248/ENSG00000115008/ENSG00000136244/ENSG00000153993/ENSG00000137462/ENSG00000058085/ENSG00000163734/ENSG00000056558…
GO:0001664	G protein-coupled receptor binding	18	0.691156	2.28463	1.05972e-05	0.000792672	0.000783079	61	tags=72%, list=22%, signal=60%	ENSG00000169429/ENSG00000006210/ENSG00000124875/ENSG00000108691/ENSG00000115009/ENSG00000163739/ENSG00000169245/ENSG00000163735/ENSG00000169248/ENSG00000163734/ENSG00000081041/ENSG00000125730/ENSG00000173432
GO:0005153	interleukin-8 receptor binding	2	0.985507	1.63017	0.00044359	0.0301641	0.0297991	6	tags=100%, list=2%, signal=99%	ENSG00000169429/ENSG00000006210
GO:0048020	CCR chemokine receptor binding	4	0.874063	1.81549	0.000672182	0.0418994	0.0413923	13	tags=75%, list=5%, signal=73%	ENSG00000006210/ENSG00000108691/ENSG00000115009
GO:0098772	molecular function regulator	92	0.410795	1.73118	0.000868113	0.0499499	0.0493454	84	tags=43%, list=30%, signal=45%	ENSG00000227507/ENSG00000169429/ENSG00000232810/ENSG00000006210/ENSG00000124875/ENSG00000108691/ENSG00000134363/ENSG00000115009/ENSG00000136689/ENSG00000163739/ENSG00000108342/ENSG00000169245/ENSG00000163735/ENSG00000125538/ENSG00000162892/ENSG00000135919/ENSG00000169248/ENSG00000115008/ENSG00000136244/ENSG00000153993/ENSG00000105825/ENSG00000028277/ENSG00000163734/ENSG00000081041/ENSG00000102524…
GO:0005149	interleukin-1 receptor binding	3	0.912727	1.71448	0.00105841	0.0565495	0.0558651	27	tags=100%, list=10%, signal=91%	ENSG00000136689/ENSG00000125538/ENSG00000115008
GO:0005539	glycosaminoglycan binding	13	0.637175	1.9429	0.00141163	0.0701653	0.0693161	61	tags=69%, list=22%, signal=57%	ENSG00000123610/ENSG00000124875/ENSG00000169245/ENSG00000135919/ENSG00000169248/ENSG00000137462/ENSG00000058085/ENSG00000101670/ENSG00000173432
GO:1901681	sulfur compound binding	11	0.664104	1.92786	0.00150086	0.0701653	0.0693161	61	tags=73%, list=22%, signal=59%	ENSG00000124875/ENSG00000134363/ENSG00000169245/ENSG00000135919/ENSG00000169248/ENSG00000058085/ENSG00000101670/ENSG00000173432
GO:0008201	heparin binding	9	0.678477	1.8373	0.00347349	0.152834	0.150984	61	tags=78%, list=22%, signal=63%	ENSG00000124875/ENSG00000169245/ENSG00000135919/ENSG00000169248/ENSG00000058085/ENSG00000101670/ENSG00000173432
GO:0005164	tumor necrosis factor receptor binding	6	0.740379	1.77635	0.00439026	0.172838	0.170746	52	tags=83%, list=19%, signal=69%	ENSG00000227507/ENSG00000232810/ENSG00000056558/ENSG00000102524/ENSG00000226979
GO:0032813	tumor necrosis factor receptor superfamily binding	6	0.740379	1.77635	0.00439026	0.172838	0.170746	52	tags=83%, list=19%, signal=69%	ENSG00000227507/ENSG00000232810/ENSG00000056558/ENSG00000102524/ENSG00000226979
GO:0005308	creatine transmembrane transporter activity	1	-1	-1.33578	0.00729915	0.251029	0.247991	2	tags=100%, list=1%, signal=100%
GO:0072349	modified amino acid transmembrane transporter activity	1	-1	-1.33578	0.00729915	0.251029	0.247991	2	tags=100%, list=1%, signal=100%
GO:0033691	sialic acid binding	1	1	1.34419	0.00771881	0.251029	0.247991	1	tags=100%, list=0%, signal=100%	ENSG00000007908
GO:0043274	phospholipase binding	1	1	1.34419	0.00771881	0.251029	0.247991	1	tags=100%, list=0%, signal=100%	ENSG00000007908
GO:0048248	CXCR3 chemokine receptor binding	2	0.913043	1.5103	0.0135189	0.421338	0.416239	26	tags=100%, list=9%, signal=91%	ENSG00000169245/ENSG00000169248
GO:0031406	carboxylic acid binding	4	0.772193	1.6039	0.0143685	0.429906	0.424703	3	tags=50%, list=1%, signal=50%	ENSG00000007908/ENSG00000123610
GO:0042056	chemoattractant activity	3	0.815691	1.53221	0.0153658	0.439383	0.434066	17	tags=67%, list=6%, signal=63%	ENSG00000006210/ENSG00000169245
GO:0070851	growth factor receptor binding	11	0.585783	1.7005	0.0160992	0.439383	0.434066	29	tags=45%, list=10%, signal=42%	ENSG00000136689/ENSG00000108342/ENSG00000125538/ENSG00000115008/ENSG00000136244
GO:0016491	oxidoreductase activity	9	0.614106	1.66298	0.0164475	0.439383	0.434066	50	tags=56%, list=18%, signal=47%	ENSG00000162692/ENSG00000104951/ENSG00000166920/ENSG00000211448/ENSG00000112096

## Sheet: GO Cellular componenet
ID	Description	setSize	enrichmentScore	NES	pvalue	p.adjust	qvalues	rank	leading_edge	core_enrichment
GO:0005615	extracellular space	94	0.574439	2.47565	3.72894e-10	1.58107e-07	1.58107e-07	84	tags=55%, list=30%, signal=58%	ENSG00000007908/ENSG00000227507/ENSG00000123610/ENSG00000169429/ENSG00000232810/ENSG00000006210/ENSG00000124875/ENSG00000162692/ENSG00000108691/ENSG00000134363/ENSG00000115009/ENSG00000136689/ENSG00000163739/ENSG00000108342/ENSG00000169245/ENSG00000163735/ENSG00000125538/ENSG00000162892/ENSG00000135919/ENSG00000169248/ENSG00000115008/ENSG00000136244/ENSG00000153993/ENSG00000105825/ENSG00000058085…
GO:0005576	extracellular region	110	0.535005	2.30545	5.44112e-09	1.15352e-06	1.15352e-06	84	tags=50%, list=30%, signal=58%	ENSG00000007908/ENSG00000227507/ENSG00000123610/ENSG00000169429/ENSG00000232810/ENSG00000006210/ENSG00000124875/ENSG00000162692/ENSG00000108691/ENSG00000134363/ENSG00000115009/ENSG00000136689/ENSG00000163739/ENSG00000108342/ENSG00000169245/ENSG00000163735/ENSG00000125538/ENSG00000162892/ENSG00000135919/ENSG00000104951/ENSG00000169248/ENSG00000115008/ENSG00000136244/ENSG00000153993/ENSG00000105825…
GO:0031981	nuclear lumen	65	-0.233823	-1.93653	0.000441135	0.062347	0.062347	221	tags=98%, list=79%, signal=26%	ENSG00000104856/ENSG00000163132/ENSG00000120875/ENSG00000163874/ENSG00000161940/ENSG00000077150/ENSG00000168062/ENSG00000139289/ENSG00000184371/ENSG00000172183/ENSG00000023445/ENSG00000048052/ENSG00000136237/ENSG00000144802/ENSG00000105499/ENSG00000134954/ENSG00000111817/ENSG00000125347/ENSG00000175592/ENSG00000153071/ENSG00000131979/ENSG00000171223/ENSG00000145901/ENSG00000263528/ENSG00000134107…
GO:0005654	nucleoplasm	59	-0.223365	-1.9152	0.000820562	0.0869796	0.0869796	221	tags=98%, list=79%, signal=26%	ENSG00000104856/ENSG00000163132/ENSG00000120875/ENSG00000163874/ENSG00000161940/ENSG00000077150/ENSG00000139289/ENSG00000184371/ENSG00000172183/ENSG00000023445/ENSG00000048052/ENSG00000136237/ENSG00000144802/ENSG00000105499/ENSG00000134954/ENSG00000111817/ENSG00000125347/ENSG00000175592/ENSG00000131979/ENSG00000171223/ENSG00000145901/ENSG00000263528/ENSG00000134107/ENSG00000010030/ENSG00000167191…
GO:0030863	cortical cytoskeleton	1	1	1.34245	0.00367445	0.188562	0.188562	1	tags=100%, list=0%, signal=100%	ENSG00000007908
GO:0001725	stress fiber	3	-0.887273	-1.89337	0.0040025	0.188562	0.188562	35	tags=100%, list=13%, signal=88%	ENSG00000173210/ENSG00000185483
GO:0032432	actin filament bundle	3	-0.887273	-1.89337	0.0040025	0.188562	0.188562	35	tags=100%, list=13%, signal=88%	ENSG00000173210/ENSG00000185483
GO:0042641	actomyosin	3	-0.887273	-1.89337	0.0040025	0.188562	0.188562	35	tags=100%, list=13%, signal=88%	ENSG00000173210/ENSG00000185483
GO:0097517	contractile actin filament bundle	3	-0.887273	-1.89337	0.0040025	0.188562	0.188562	35	tags=100%, list=13%, signal=88%	ENSG00000173210/ENSG00000185483
