# Supplementary material for: Development of a bioinformatics platform for analysis of quantitative transcriptomics and proteomics data: the OMnalysis
Source: PeerJ. 2021 Nov 9;9:e12415. doi: 10.7717/peerj.12415 (PMC8588854; doi:10.7717/peerj.12415)
Supplement: Supplemental Information 11 [file peerj-09-12415-s011.xlsx]

## Sheet: GO Biological process
ID	Description	GeneRatio	BgRatio	pvalue	p.adjust	qvalue	geneID	Count
GO:0035376	sterol import	2016-03-01	4535-09-01	2.98925e-06	0.00124203	0.000718992	APOA1/APOC3/CD36	3
GO:0070508	cholesterol import	2016-03-01	4535-09-01	2.98925e-06	0.00124203	0.000718992	APOA1/APOC3/CD36	3
GO:0006952	defense response	2016-08-01	338/4535	6.64601e-06	0.00184095	0.00106569	APOA1/CATHL3/CATHL1/SERPINF2/CATHL4/VIM/CFB/PGLYRP1	8
GO:0032488	Cdc42 protein signal transduction	2016-02-01	4535-02-01	1.16722e-05	0.00193592	0.00112068	APOA1/APOC3	2
GO:0032489	regulation of Cdc42 protein signal transduction	2016-02-01	4535-02-01	1.16722e-05	0.00193592	0.00112068	APOA1/APOC3	2
GO:0051707	response to other organism	2016-07-01	279/4535	2.18903e-05	0.00193592	0.00112068	CATHL3/CATHL1/CD36/CATHL4/VIM/CFB/PGLYRP1	7
GO:0043207	response to external biotic stimulus	2016-07-01	280/4535	2.24107e-05	0.00193592	0.00112068	CATHL3/CATHL1/CD36/CATHL4/VIM/CFB/PGLYRP1	7
GO:0051492	regulation of stress fiber assembly	2016-03-01	17/4535	2.37852e-05	0.00193592	0.00112068	APOA1/SERPINF2/ACTG1	3
GO:0009607	response to biotic stimulus	2016-07-01	288/4535	2.69573e-05	0.00193592	0.00112068	CATHL3/CATHL1/CD36/CATHL4/VIM/CFB/PGLYRP1	7
GO:0030038	contractile actin filament bundle assembly	2016-03-01	18/4535	2.84808e-05	0.00193592	0.00112068	APOA1/SERPINF2/ACTG1	3
GO:0043149	stress fiber assembly	2016-03-01	18/4535	2.84808e-05	0.00193592	0.00112068	APOA1/SERPINF2/ACTG1	3
GO:0032231	regulation of actin filament bundle assembly	2016-03-01	19/4535	3.37481e-05	0.00193592	0.00112068	APOA1/SERPINF2/ACTG1	3
GO:0110020	regulation of actomyosin structure organization	2016-03-01	19/4535	3.37481e-05	0.00193592	0.00112068	APOA1/SERPINF2/ACTG1	3
GO:0010901	regulation of very-low-density lipoprotein particle remodeling	2016-02-01	4535-03-01	3.49445e-05	0.00193592	0.00112068	APOA1/APOC3	2
GO:0010903	negative regulation of very-low-density lipoprotein particle remodeling	2016-02-01	4535-03-01	3.49445e-05	0.00193592	0.00112068	APOA1/APOC3	2
GO:0051241	negative regulation of multicellular organismal process	2016-06-01	210/4535	4.97785e-05	0.00258537	0.00149663	APOA1/APOC3/SERPINF2/VIM/MMP9/PGLYRP1	6
GO:0098542	defense response to other organism	2016-06-01	220/4535	6.47444e-05	0.00299158	0.00173178	CATHL3/CATHL1/CATHL4/VIM/CFB/PGLYRP1	6
GO:0015918	sterol transport	2016-03-01	24/4535	6.9736e-05	0.00299158	0.00173178	APOA1/APOC3/CD36	3
GO:0030301	cholesterol transport	2016-03-01	24/4535	6.9736e-05	0.00299158	0.00173178	APOA1/APOC3/CD36	3
GO:0044419	interspecies interaction between organisms	2016-07-01	335/4535	7.19995e-05	0.00299158	0.00173178	CATHL3/CATHL1/CD36/CATHL4/VIM/CFB/PGLYRP1	7
GO:0097435	supramolecular fiber organization	2016-05-01	142/4535	9.27451e-05	0.00361774	0.00209425	APOA1/CD36/SERPINF2/VIM/ACTG1	5
GO:0051017	actin filament bundle assembly	2016-03-01	27/4535	0.00010013	0.00361774	0.00209425	APOA1/SERPINF2/ACTG1	3
GO:0061572	actin filament bundle organization	2016-03-01	27/4535	0.00010013	0.00361774	0.00209425	APOA1/SERPINF2/ACTG1	3
GO:0034370	triglyceride-rich lipoprotein particle remodeling	2016-02-01	4535-05-01	0.000116002	0.00370762	0.00214628	APOA1/APOC3	2
GO:0034372	very-low-density lipoprotein particle remodeling	2016-02-01	4535-05-01	0.000116002	0.00370762	0.00214628	APOA1/APOC3	2
GO:0034375	high-density lipoprotein particle remodeling	2016-02-01	4535-05-01	0.000116002	0.00370762	0.00214628	APOA1/APOC3	2
GO:0010714	positive regulation of collagen metabolic process	2016-02-01	4535-06-01	0.000173646	0.00497584	0.00288044	SERPINF2/VIM	2
GO:0032967	positive regulation of collagen biosynthetic process	2016-02-01	4535-06-01	0.000173646	0.00497584	0.00288044	SERPINF2/VIM	2
GO:0033700	phospholipid efflux	2016-02-01	4535-06-01	0.000173646	0.00497584	0.00288044	APOA1/APOC3	2
GO:0031032	actomyosin structure organization	2016-03-01	36/4535	0.000239724	0.0057601	0.00333443	APOA1/SERPINF2/ACTG1	3
GO:0051128	regulation of cellular component organization	2016-07-01	405/4535	0.000241362	0.0057601	0.00333443	APOA1/APOC3/CD36/SERPINF2/VIM/MMP9/ACTG1	7
GO:0032965	regulation of collagen biosynthetic process	2016-02-01	4535-07-01	0.000242603	0.0057601	0.00333443	SERPINF2/VIM	2
GO:0034367	protein-containing complex remodeling	2016-02-01	4535-07-01	0.000242603	0.0057601	0.00333443	APOA1/APOC3	2
GO:0034368	protein-lipid complex remodeling	2016-02-01	4535-07-01	0.000242603	0.0057601	0.00333443	APOA1/APOC3	2
GO:0034369	plasma lipoprotein particle remodeling	2016-02-01	4535-07-01	0.000242603	0.0057601	0.00333443	APOA1/APOC3	2
GO:0009617	response to bacterium	2016-04-01	111/4535	0.000493007	0.0112986	0.00654057	CATHL3/CATHL1/CD36/VIM	4
GO:0010712	regulation of collagen metabolic process	2016-02-01	4535-10-01	0.000516662	0.0112986	0.00654057	SERPINF2/VIM	2
GO:0031640	killing of cells of other organism	2016-02-01	4535-10-01	0.000516662	0.0112986	0.00654057	CATHL4/PGLYRP1	2
GO:0015850	organic hydroxy compound transport	2016-03-01	47/4535	0.000531655	0.0113283	0.00655779	APOA1/APOC3/CD36	3
GO:0032964	collagen biosynthetic process	2016-02-01	4535-11-01	0.000630176	0.0120589	0.0069807	SERPINF2/VIM	2
GO:0048661	positive regulation of smooth muscle cell proliferation	2016-02-01	4535-11-01	0.000630176	0.0120589	0.0069807	SERPINF2/MMP9	2
GO:0071825	protein-lipid complex subunit organization	2016-02-01	4535-11-01	0.000630176	0.0120589	0.0069807	APOA1/APOC3	2
GO:0071827	plasma lipoprotein particle organization	2016-02-01	4535-11-01	0.000630176	0.0120589	0.0069807	APOA1/APOC3	2
GO:0110053	regulation of actin filament organization	2016-03-01	50/4535	0.000638497	0.0120589	0.0069807	APOA1/SERPINF2/ACTG1	3
GO:0030036	actin cytoskeleton organization	2016-04-01	123/4535	0.000728368	0.0134505	0.0077863	PFN1/APOA1/SERPINF2/ACTG1	4
GO:0051496	positive regulation of stress fiber assembly	2016-02-01	4535-12-01	0.000754656	0.013633	0.00789194	APOA1/SERPINF2	2
GO:0032233	positive regulation of actin filament bundle assembly	2016-02-01	13/4535	0.000890031	0.0150942	0.00873779	APOA1/SERPINF2	2
GO:0033344	cholesterol efflux	2016-02-01	13/4535	0.000890031	0.0150942	0.00873779	APOA1/APOC3	2
GO:0050832	defense response to fungus	2016-02-01	13/4535	0.000890031	0.0150942	0.00873779	CATHL4/PGLYRP1	2
GO:0030029	actin filament-based process	2016-04-01	135/4535	0.00103467	0.0162474	0.00940534	PFN1/APOA1/SERPINF2/ACTG1	4
GO:0009620	response to fungus	2016-02-01	14/4535	0.00103623	0.0162474	0.00940534	CATHL4/PGLYRP1	2
GO:0032371	regulation of sterol transport	2016-02-01	14/4535	0.00103623	0.0162474	0.00940534	APOA1/APOC3	2
GO:0032374	regulation of cholesterol transport	2016-02-01	14/4535	0.00103623	0.0162474	0.00940534	APOA1/APOC3	2
GO:0090303	positive regulation of wound healing	2016-02-01	15/4535	0.0011932	0.018362	0.0106294	SERPINF2/ACTG1	2
GO:0032956	regulation of actin cytoskeleton organization	2016-03-01	63/4535	0.00125787	0.0188438	0.0109084	APOA1/SERPINF2/ACTG1	3
GO:0007010	cytoskeleton organization	2016-05-01	249/4535	0.00126986	0.0188438	0.0109084	PFN1/APOA1/SERPINF2/VIM/ACTG1	5
GO:1903036	positive regulation of response to wounding	2016-02-01	17/4535	0.00153912	0.0224388	0.0129895	SERPINF2/ACTG1	2
GO:0032970	regulation of actin filament-based process	2016-03-01	69/4535	0.00163827	0.0234724	0.0135878	APOA1/SERPINF2/ACTG1	3
GO:0032368	regulation of lipid transport	2016-02-01	18/4535	0.00172795	0.0235398	0.0136268	APOA1/APOC3	2
GO:0035023	regulation of Rho protein signal transduction	2016-02-01	18/4535	0.00172795	0.0235398	0.0136268	APOA1/APOC3	2
GO:0097006	regulation of plasma lipoprotein particle levels	2016-02-01	18/4535	0.00172795	0.0235398	0.0136268	APOA1/APOC3	2
GO:0048584	positive regulation of response to stimulus	2016-06-01	406/4535	0.00182472	0.0244572	0.0141579	APOA1/CD36/SERPINF2/MMP9/ACTG1/CFB	6
GO:0007015	actin filament organization	2016-03-01	73/4535	0.00192804	0.0254318	0.0147221	APOA1/SERPINF2/ACTG1	3
GO:0006869	lipid transport	2016-03-01	74/4535	0.00200518	0.0256354	0.0148399	APOA1/APOC3/CD36	3
GO:1902903	regulation of supramolecular fiber organization	2016-03-01	74/4535	0.00200518	0.0256354	0.0148399	APOA1/SERPINF2/ACTG1	3
GO:0045595	regulation of cell differentiation	2016-05-01	278/4535	0.00208189	0.0262129	0.0151742	APOA1/SERPINF2/VIM/MMP9/PGLYRP1	5
GO:0032102	negative regulation of response to external stimulus	2016-03-01	78/4535	0.00233301	0.0288052	0.0166749	APOA1/SERPINF2/PGLYRP1	3
GO:0015914	phospholipid transport	2016-02-01	21/4535	0.0023571	0.0288052	0.0166749	APOA1/APOC3	2
GO:0044087	regulation of cellular component biogenesis	2016-04-01	172/4535	0.00254247	0.0302845	0.0175312	APOA1/CD36/SERPINF2/ACTG1	4
GO:0048659	smooth muscle cell proliferation	2016-02-01	22/4535	0.00258749	0.0302845	0.0175312	SERPINF2/MMP9	2
GO:0048660	regulation of smooth muscle cell proliferation	2016-02-01	22/4535	0.00258749	0.0302845	0.0175312	SERPINF2/MMP9	2
GO:0007266	Rho protein signal transduction	2016-02-01	24/4535	0.00307885	0.0322183	0.0186506	APOA1/APOC3	2
GO:0032963	collagen metabolic process	2016-02-01	24/4535	0.00307885	0.0322183	0.0186506	SERPINF2/VIM	2
GO:1902531	regulation of intracellular signal transduction	2016-05-01	309/4535	0.00332142	0.0322183	0.0186506	APOA1/APOC3/CD36/SERPINF2/MMP9	5
GO:0045861	negative regulation of proteolysis	2016-03-01	89/4535	0.00340093	0.0322183	0.0186506	PEBP1/SERPINF2/MMP9	3
GO:0010876	lipid localization	2016-03-01	90/4535	0.00351062	0.0322183	0.0186506	APOA1/APOC3/CD36	3
GO:0000270	peptidoglycan metabolic process	2016-01-01	4535-01-01	0.00352811	0.0322183	0.0186506	PGLYRP1	1
GO:0002325	natural killer cell differentiation involved in immune response	2016-01-01	4535-01-01	0.00352811	0.0322183	0.0186506	PGLYRP1	1
GO:0009253	peptidoglycan catabolic process	2016-01-01	4535-01-01	0.00352811	0.0322183	0.0186506	PGLYRP1	1
GO:0032815	negative regulation of natural killer cell activation	2016-01-01	4535-01-01	0.00352811	0.0322183	0.0186506	PGLYRP1	1
GO:0032824	negative regulation of natural killer cell differentiation	2016-01-01	4535-01-01	0.00352811	0.0322183	0.0186506	PGLYRP1	1
GO:0032826	regulation of natural killer cell differentiation involved in immune response	2016-01-01	4535-01-01	0.00352811	0.0322183	0.0186506	PGLYRP1	1
GO:0032827	negative regulation of natural killer cell differentiation involved in immune response	2016-01-01	4535-01-01	0.00352811	0.0322183	0.0186506	PGLYRP1	1
GO:0044110	growth involved in symbiotic interaction	2016-01-01	4535-01-01	0.00352811	0.0322183	0.0186506	PGLYRP1	1
GO:0044117	growth of symbiont in host	2016-01-01	4535-01-01	0.00352811	0.0322183	0.0186506	PGLYRP1	1
GO:0051918	negative regulation of fibrinolysis	2016-01-01	4535-01-01	0.00352811	0.0322183	0.0186506	SERPINF2	1
GO:0060354	negative regulation of cell adhesion molecule production	2016-01-01	4535-01-01	0.00352811	0.0322183	0.0186506	APOA1	1
GO:0070543	response to linoleic acid	2016-01-01	4535-01-01	0.00352811	0.0322183	0.0186506	CD36	1
GO:1902396	protein localization to bicellular tight junction	2016-01-01	4535-01-01	0.00352811	0.0322183	0.0186506	ACTG1	1
GO:1902994	regulation of phospholipid efflux	2016-01-01	4535-01-01	0.00352811	0.0322183	0.0186506	APOA1	1
GO:1902995	positive regulation of phospholipid efflux	2016-01-01	4535-01-01	0.00352811	0.0322183	0.0186506	APOA1	1
GO:0001906	cell killing	2016-02-01	27/4535	0.00389141	0.0351496	0.0203475	CATHL4/PGLYRP1	2
GO:0051130	positive regulation of cellular component organization	2016-04-01	195/4535	0.00401387	0.0358658	0.0207622	APOA1/CD36/SERPINF2/MMP9	4
GO:0051346	negative regulation of hydrolase activity	2016-03-01	97/4535	0.00433982	0.0383659	0.0222094	PEBP1/APOA1/MMP9	3
GO:0007369	gastrulation	2016-02-01	29/4535	0.0044827	0.0384034	0.0222311	APOA1/MMP9	2
GO:0010810	regulation of cell-substrate adhesion	2016-02-01	29/4535	0.0044827	0.0384034	0.0222311	APOA1/ACTG1	2
GO:1905952	regulation of lipid localization	2016-02-01	29/4535	0.0044827	0.0384034	0.0222311	APOA1/APOC3	2
GO:0015711	organic anion transport	2016-03-01	99/4535	0.00459688	0.0389796	0.0225647	APOA1/APOC3/CD36	3
GO:0044089	positive regulation of cellular component biogenesis	2016-03-01	101/4535	0.00486308	0.0408204	0.0236303	APOA1/CD36/SERPINF2	3
GO:0033002	muscle cell proliferation	2016-02-01	31/4535	0.00511307	0.0416564	0.0241142	SERPINF2/MMP9	2
GO:0042157	lipoprotein metabolic process	2016-02-01	31/4535	0.00511307	0.0416564	0.0241142	APOA1/APOC3	2
GO:0070374	positive regulation of ERK1 and ERK2 cascade	2016-02-01	31/4535	0.00511307	0.0416564	0.0241142	CD36/SERPINF2	2
GO:0051493	regulation of cytoskeleton organization	2016-03-01	105/4535	0.0054233	0.0437549	0.025329	APOA1/SERPINF2/ACTG1	3
GO:0045596	negative regulation of cell differentiation	2016-03-01	106/4535	0.00556922	0.0445002	0.0257605	VIM/MMP9/PGLYRP1	3
GO:0046578	regulation of Ras protein signal transduction	2016-02-01	33/4535	0.00578199	0.0453801	0.0262698	APOA1/APOC3	2
GO:0051056	regulation of small GTPase mediated signal transduction	2016-02-01	34/4535	0.00613075	0.0453801	0.0262698	APOA1/APOC3	2
GO:0061041	regulation of wound healing	2016-02-01	34/4535	0.00613075	0.0453801	0.0262698	SERPINF2/ACTG1	2
GO:0050728	negative regulation of inflammatory response	2016-02-01	35/4535	0.00648896	0.0453801	0.0262698	APOA1/PGLYRP1	2
GO:1903034	regulation of response to wounding	2016-02-01	36/4535	0.00685657	0.0453801	0.0262698	SERPINF2/ACTG1	2
GO:0010638	positive regulation of organelle organization	2016-03-01	115/4535	0.00699046	0.0453801	0.0262698	APOA1/SERPINF2/MMP9	3
GO:0002034	regulation of blood vessel diameter by renin-angiotensin	2016-01-01	4535-02-01	0.00704456	0.0453801	0.0262698	SERPINF2	1
GO:0003072	renal control of peripheral vascular resistance involved in regulation of systemic arterial blood pressure	2016-01-01	4535-02-01	0.00704456	0.0453801	0.0262698	SERPINF2	1
GO:0010757	negative regulation of plasminogen activation	2016-01-01	4535-02-01	0.00704456	0.0453801	0.0262698	SERPINF2	1
GO:0032372	negative regulation of sterol transport	2016-01-01	4535-02-01	0.00704456	0.0453801	0.0262698	APOC3	1
GO:0032375	negative regulation of cholesterol transport	2016-01-01	4535-02-01	0.00704456	0.0453801	0.0262698	APOC3	1
GO:0032823	regulation of natural killer cell differentiation	2016-01-01	4535-02-01	0.00704456	0.0453801	0.0262698	PGLYRP1	1
GO:0034382	chylomicron remnant clearance	2016-01-01	4535-02-01	0.00704456	0.0453801	0.0262698	APOC3	1
GO:0051546	keratinocyte migration	2016-01-01	4535-02-01	0.00704456	0.0453801	0.0262698	MMP9	1
GO:0051547	regulation of keratinocyte migration	2016-01-01	4535-02-01	0.00704456	0.0453801	0.0262698	MMP9	1
GO:0051549	positive regulation of keratinocyte migration	2016-01-01	4535-02-01	0.00704456	0.0453801	0.0262698	MMP9	1
GO:0051917	regulation of fibrinolysis	2016-01-01	4535-02-01	0.00704456	0.0453801	0.0262698	SERPINF2	1
GO:0055091	phospholipid homeostasis	2016-01-01	4535-02-01	0.00704456	0.0453801	0.0262698	APOA1	1
GO:0060621	negative regulation of cholesterol import	2016-01-01	4535-02-01	0.00704456	0.0453801	0.0262698	APOC3	1
GO:0070327	thyroid hormone transport	2016-01-01	4535-02-01	0.00704456	0.0453801	0.0262698	TTR	1
GO:0071830	triglyceride-rich lipoprotein particle clearance	2016-01-01	4535-02-01	0.00704456	0.0453801	0.0262698	APOC3	1
GO:1904707	positive regulation of vascular associated smooth muscle cell proliferation	2016-01-01	4535-02-01	0.00704456	0.0453801	0.0262698	MMP9	1
GO:2000910	negative regulation of sterol import	2016-01-01	4535-02-01	0.00704456	0.0453801	0.0262698	APOC3	1
GO:2001138	regulation of phospholipid transport	2016-01-01	4535-02-01	0.00704456	0.0453801	0.0262698	APOA1	1
GO:2001140	positive regulation of phospholipid transport	2016-01-01	4535-02-01	0.00704456	0.0453801	0.0262698	APOA1	1
GO:0033043	regulation of organelle organization	2016-04-01	230/4535	0.00723696	0.0462609	0.0267797	APOA1/SERPINF2/MMP9/ACTG1	4
GO:0051129	negative regulation of cellular component organization	2016-03-01	119/4535	0.00768578	0.0487548	0.0282234	APOA1/APOC3/VIM	3
GO:0006959	humoral immune response	2016-02-01	41/4535	0.00883324	0.0556093	0.0321913	CFB/PGLYRP1	2
GO:0031589	cell-substrate adhesion	2016-02-01	42/4535	0.00925588	0.056708	0.0328274	APOA1/ACTG1	2
GO:0042742	defense response to bacterium	2016-02-01	42/4535	0.00925588	0.056708	0.0328274	CATHL3/CATHL1	2
GO:0006820	anion transport	2016-03-01	131/4535	0.0100143	0.056708	0.0328274	APOA1/APOC3/CD36	3
GO:0015748	organophosphate ester transport	2016-02-01	44/4535	0.010128	0.056708	0.0328274	APOA1/APOC3	2
GO:0002323	natural killer cell activation involved in immune response	2016-01-01	4535-03-01	0.0105494	0.056708	0.0328274	PGLYRP1	1
GO:0010804	negative regulation of tumor necrosis factor-mediated signaling pathway	2016-01-01	4535-03-01	0.0105494	0.056708	0.0328274	APOA1	1
GO:0010955	negative regulation of protein processing	2016-01-01	4535-03-01	0.0105494	0.056708	0.0328274	SERPINF2	1
GO:0018206	peptidyl-methionine modification	2016-01-01	4535-03-01	0.0105494	0.056708	0.0328274	APOA1	1
GO:0032928	regulation of superoxide anion generation	2016-01-01	4535-03-01	0.0105494	0.056708	0.0328274	VIM	1
GO:0032930	positive regulation of superoxide anion generation	2016-01-01	4535-03-01	0.0105494	0.056708	0.0328274	VIM	1
GO:0034115	negative regulation of heterotypic cell-cell adhesion	2016-01-01	4535-03-01	0.0105494	0.056708	0.0328274	APOA1	1
GO:0034196	acylglycerol transport	2016-01-01	4535-03-01	0.0105494	0.056708	0.0328274	CD36	1
GO:0034197	triglyceride transport	2016-01-01	4535-03-01	0.0105494	0.056708	0.0328274	CD36	1
GO:0048261	negative regulation of receptor-mediated endocytosis	2016-01-01	4535-03-01	0.0105494	0.056708	0.0328274	APOC3	1
GO:0060020	Bergmann glial cell differentiation	2016-01-01	4535-03-01	0.0105494	0.056708	0.0328274	VIM	1
GO:0070587	regulation of cell-cell adhesion involved in gastrulation	2016-01-01	4535-03-01	0.0105494	0.056708	0.0328274	APOA1	1
GO:0071636	positive regulation of transforming growth factor beta production	2016-01-01	4535-03-01	0.0105494	0.056708	0.0328274	SERPINF2	1
GO:0150105	protein localization to cell-cell junction	2016-01-01	4535-03-01	0.0105494	0.056708	0.0328274	ACTG1	1
GO:1900122	positive regulation of receptor binding	2016-01-01	4535-03-01	0.0105494	0.056708	0.0328274	MMP9	1
GO:1900227	positive regulation of NLRP3 inflammasome complex assembly	2016-01-01	4535-03-01	0.0105494	0.056708	0.0328274	CD36	1
GO:1903318	negative regulation of protein maturation	2016-01-01	4535-03-01	0.0105494	0.056708	0.0328274	SERPINF2	1
GO:2000697	negative regulation of epithelial cell differentiation involved in kidney development	2016-01-01	4535-03-01	0.0105494	0.056708	0.0328274	MMP9	1
GO:0071219	cellular response to molecule of bacterial origin	2016-02-01	45/4535	0.0105773	0.056708	0.0328274	CD36/VIM	2
GO:0070372	regulation of ERK1 and ERK2 cascade	2016-02-01	46/4535	0.0110354	0.0584104	0.0338129	CD36/SERPINF2	2
GO:1902905	positive regulation of supramolecular fiber organization	2016-02-01	46/4535	0.0110354	0.0584104	0.0338129	APOA1/SERPINF2	2
GO:0006898	receptor-mediated endocytosis	2016-02-01	48/4535	0.0119777	0.0604631	0.0350011	APOC3/CD36	2
GO:0070371	ERK1 and ERK2 cascade	2016-02-01	48/4535	0.0119777	0.0604631	0.0350011	CD36/SERPINF2	2
GO:0031348	negative regulation of defense response	2016-02-01	49/4535	0.0124618	0.0604631	0.0350011	APOA1/PGLYRP1	2
GO:0080134	regulation of response to stress	2016-04-01	269/4535	0.0124916	0.0604631	0.0350011	APOA1/SERPINF2/ACTG1/PGLYRP1	4
GO:0001932	regulation of protein phosphorylation	2016-04-01	270/4535	0.0126519	0.0604631	0.0350011	APOA1/CD36/SERPINF2/MMP9	4
GO:0009967	positive regulation of signal transduction	2016-04-01	274/4535	0.0133069	0.0604631	0.0350011	APOA1/CD36/SERPINF2/MMP9	4
GO:0051495	positive regulation of cytoskeleton organization	2016-02-01	51/4535	0.0134556	0.0604631	0.0350011	APOA1/SERPINF2	2
GO:0071216	cellular response to biotic stimulus	2016-02-01	52/4535	0.0139652	0.0604631	0.0350011	CD36/VIM	2
GO:0001706	endoderm formation	2016-01-01	4535-04-01	0.0140426	0.0604631	0.0350011	MMP9	1
GO:0010755	regulation of plasminogen activation	2016-01-01	4535-04-01	0.0140426	0.0604631	0.0350011	SERPINF2	1
GO:0030299	intestinal cholesterol absorption	2016-01-01	4535-04-01	0.0140426	0.0604631	0.0350011	CD36	1
GO:0032369	negative regulation of lipid transport	2016-01-01	4535-04-01	0.0140426	0.0604631	0.0350011	APOC3	1
GO:0032493	response to bacterial lipoprotein	2016-01-01	4535-04-01	0.0140426	0.0604631	0.0350011	CD36	1
GO:0032495	response to muramyl dipeptide	2016-01-01	4535-04-01	0.0140426	0.0604631	0.0350011	VIM	1
GO:0032689	negative regulation of interferon-gamma production	2016-01-01	4535-04-01	0.0140426	0.0604631	0.0350011	PGLYRP1	1
GO:0034114	regulation of heterotypic cell-cell adhesion	2016-01-01	4535-04-01	0.0140426	0.0604631	0.0350011	APOA1	1
GO:0035987	endodermal cell differentiation	2016-01-01	4535-04-01	0.0140426	0.0604631	0.0350011	MMP9	1
GO:0044539	long-chain fatty acid import into cell	2016-01-01	4535-04-01	0.0140426	0.0604631	0.0350011	CD36	1
GO:0045742	positive regulation of epidermal growth factor receptor signaling pathway	2016-01-01	4535-04-01	0.0140426	0.0604631	0.0350011	MMP9	1
GO:0050919	negative chemotaxis	2016-01-01	4535-04-01	0.0140426	0.0604631	0.0350011	APOA1	1
GO:0060620	regulation of cholesterol import	2016-01-01	4535-04-01	0.0140426	0.0604631	0.0350011	APOC3	1
GO:0070339	response to bacterial lipopeptide	2016-01-01	4535-04-01	0.0140426	0.0604631	0.0350011	CD36	1
GO:0070586	cell-cell adhesion involved in gastrulation	2016-01-01	4535-04-01	0.0140426	0.0604631	0.0350011	APOA1	1
GO:0071220	cellular response to bacterial lipoprotein	2016-01-01	4535-04-01	0.0140426	0.0604631	0.0350011	CD36	1
GO:0071221	cellular response to bacterial lipopeptide	2016-01-01	4535-04-01	0.0140426	0.0604631	0.0350011	CD36	1
GO:0071225	cellular response to muramyl dipeptide	2016-01-01	4535-04-01	0.0140426	0.0604631	0.0350011	VIM	1
GO:0071724	response to diacyl bacterial lipopeptide	2016-01-01	4535-04-01	0.0140426	0.0604631	0.0350011	CD36	1
GO:0071726	cellular response to diacyl bacterial lipopeptide	2016-01-01	4535-04-01	0.0140426	0.0604631	0.0350011	CD36	1
GO:0090322	regulation of superoxide metabolic process	2016-01-01	4535-04-01	0.0140426	0.0604631	0.0350011	VIM	1
GO:0098856	intestinal lipid absorption	2016-01-01	4535-04-01	0.0140426	0.0604631	0.0350011	CD36	1
GO:0098974	postsynaptic actin cytoskeleton organization	2016-01-01	4535-04-01	0.0140426	0.0604631	0.0350011	ACTG1	1
GO:0140354	lipid import into cell	2016-01-01	4535-04-01	0.0140426	0.0604631	0.0350011	CD36	1
GO:1900225	regulation of NLRP3 inflammasome complex assembly	2016-01-01	4535-04-01	0.0140426	0.0604631	0.0350011	CD36	1
GO:1901186	positive regulation of ERBB signaling pathway	2016-01-01	4535-04-01	0.0140426	0.0604631	0.0350011	MMP9	1
GO:1903793	positive regulation of anion transport	2016-01-01	4535-04-01	0.0140426	0.0604631	0.0350011	APOA1	1
GO:2000909	regulation of sterol import	2016-01-01	4535-04-01	0.0140426	0.0604631	0.0350011	APOC3	1
GO:0001816	cytokine production	2016-03-01	151/4535	0.0147334	0.0627871	0.0363464	CD36/SERPINF2/PGLYRP1	3
GO:0045087	innate immune response	2016-03-01	151/4535	0.0147334	0.0627871	0.0363464	VIM/CFB/PGLYRP1	3
GO:0006955	immune response	2016-04-01	285/4535	0.0152212	0.064535	0.0373583	CD36/VIM/CFB/PGLYRP1	4
GO:0030162	regulation of proteolysis	2016-03-01	155/4535	0.0158066	0.0665563	0.0385284	PEBP1/SERPINF2/MMP9	3
GO:0050793	regulation of developmental process	2016-05-01	447/4535	0.0158582	0.0665563	0.0385284	APOA1/SERPINF2/VIM/MMP9/PGLYRP1	5
GO:0051093	negative regulation of developmental process	2016-03-01	156/4535	0.0160818	0.0668393	0.0386922	VIM/MMP9/PGLYRP1	3
GO:0007265	Ras protein signal transduction	2016-02-01	56/4535	0.0160865	0.0668393	0.0386922	APOA1/APOC3	2
GO:0032270	positive regulation of cellular protein metabolic process	2016-04-01	292/4535	0.0165279	0.0671088	0.0388482	CD36/SERPINF2/VIM/MMP9	4
GO:0002237	response to molecule of bacterial origin	2016-02-01	58/4535	0.0171962	0.0671088	0.0388482	CD36/VIM	2
GO:0048585	negative regulation of response to stimulus	2016-04-01	297/4535	0.0175042	0.0671088	0.0388482	APOA1/SERPINF2/MMP9/PGLYRP1	4
GO:0003081	regulation of systemic arterial blood pressure by renin-angiotensin	2016-01-01	4535-05-01	0.0175242	0.0671088	0.0388482	SERPINF2	1
GO:0006027	glycosaminoglycan catabolic process	2016-01-01	4535-05-01	0.0175242	0.0671088	0.0388482	PGLYRP1	1
GO:0006656	phosphatidylcholine biosynthetic process	2016-01-01	4535-05-01	0.0175242	0.0671088	0.0388482	APOA1	1
GO:0010803	regulation of tumor necrosis factor-mediated signaling pathway	2016-01-01	4535-05-01	0.0175242	0.0671088	0.0388482	APOA1	1
GO:0030325	adrenal gland development	2016-01-01	4535-05-01	0.0175242	0.0671088	0.0388482	APOA1	1
GO:0042554	superoxide anion generation	2016-01-01	4535-05-01	0.0175242	0.0671088	0.0388482	VIM	1
GO:0044241	lipid digestion	2016-01-01	4535-05-01	0.0175242	0.0671088	0.0388482	CD36	1
GO:0044546	NLRP3 inflammasome complex assembly	2016-01-01	4535-05-01	0.0175242	0.0671088	0.0388482	CD36	1
GO:0045806	negative regulation of endocytosis	2016-01-01	4535-05-01	0.0175242	0.0671088	0.0388482	APOC3	1
GO:0060353	regulation of cell adhesion molecule production	2016-01-01	4535-05-01	0.0175242	0.0671088	0.0388482	APOA1	1
GO:0099188	postsynaptic cytoskeleton organization	2016-01-01	4535-05-01	0.0175242	0.0671088	0.0388482	ACTG1	1
GO:1904645	response to amyloid-beta	2016-01-01	4535-05-01	0.0175242	0.0671088	0.0388482	MMP9	1
GO:2000696	regulation of epithelial cell differentiation involved in kidney development	2016-01-01	4535-05-01	0.0175242	0.0671088	0.0388482	MMP9	1
GO:2001268	negative regulation of cysteine-type endopeptidase activity involved in apoptotic signaling pathway	2016-01-01	4535-05-01	0.0175242	0.0671088	0.0388482	MMP9	1
GO:0010951	negative regulation of endopeptidase activity	2016-02-01	59/4535	0.0177631	0.0675062	0.0390783	PEBP1/MMP9	2
GO:0009790	embryo development	2016-03-01	162/4535	0.0177904	0.0675062	0.0390783	APOA1/VIM/MMP9	3
GO:0042325	regulation of phosphorylation	2016-04-01	302/4535	0.018517	0.0697738	0.0403909	APOA1/CD36/SERPINF2/MMP9	4
GO:0010243	response to organonitrogen compound	2016-03-01	165/4535	0.0186821	0.0697738	0.0403909	CD36/VIM/MMP9	3
GO:0010647	positive regulation of cell communication	2016-04-01	303/4535	0.0187239	0.0697738	0.0403909	APOA1/CD36/SERPINF2/MMP9	4
GO:0051247	positive regulation of protein metabolic process	2016-04-01	303/4535	0.0187239	0.0697738	0.0403909	CD36/SERPINF2/VIM/MMP9	4
GO:0035556	intracellular signal transduction	2016-05-01	467/4535	0.0189285	0.0699234	0.0404775	APOA1/APOC3/CD36/SERPINF2/MMP9	5
GO:0023056	positive regulation of signaling	2016-04-01	304/4535	0.0189323	0.0699234	0.0404775	APOA1/CD36/SERPINF2/MMP9	4
GO:0006954	inflammatory response	2016-03-01	167/4535	0.0192904	0.0706182	0.0408798	APOA1/SERPINF2/PGLYRP1	3
GO:0043086	negative regulation of catalytic activity	2016-03-01	167/4535	0.0192904	0.0706182	0.0408798	PEBP1/APOA1/MMP9	3
GO:0010466	negative regulation of peptidase activity	2016-02-01	63/4535	0.02011	0.0706327	0.0408882	PEBP1/MMP9	2
GO:0010605	negative regulation of macromolecule metabolic process	2016-05-01	476/4535	0.0204343	0.0706327	0.0408882	PEBP1/SERPINF2/VIM/MMP9/PGLYRP1	5
GO:0001779	natural killer cell differentiation	2016-01-01	4535-06-01	0.0209943	0.0706327	0.0408882	PGLYRP1	1
GO:0003071	renal system process involved in regulation of systemic arterial blood pressure	2016-01-01	4535-06-01	0.0209943	0.0706327	0.0408882	SERPINF2	1
GO:0006026	aminoglycan catabolic process	2016-01-01	4535-06-01	0.0209943	0.0706327	0.0408882	PGLYRP1	1
GO:0007492	endoderm development	2016-01-01	4535-06-01	0.0209943	0.0706327	0.0408882	MMP9	1
GO:0008211	glucocorticoid metabolic process	2016-01-01	4535-06-01	0.0209943	0.0706327	0.0408882	APOA1	1
GO:0010875	positive regulation of cholesterol efflux	2016-01-01	4535-06-01	0.0209943	0.0706327	0.0408882	APOA1	1
GO:0034113	heterotypic cell-cell adhesion	2016-01-01	4535-06-01	0.0209943	0.0706327	0.0408882	APOA1	1
GO:0035025	positive regulation of Rho protein signal transduction	2016-01-01	4535-06-01	0.0209943	0.0706327	0.0408882	APOA1	1
GO:0046686	response to cadmium ion	2016-01-01	4535-06-01	0.0209943	0.0706327	0.0408882	MMP9	1
GO:0050909	sensory perception of taste	2016-01-01	4535-06-01	0.0209943	0.0706327	0.0408882	CD36	1
GO:0060352	cell adhesion molecule production	2016-01-01	4535-06-01	0.0209943	0.0706327	0.0408882	APOA1	1
GO:0070307	lens fiber cell development	2016-01-01	4535-06-01	0.0209943	0.0706327	0.0408882	VIM	1
GO:0071276	cellular response to cadmium ion	2016-01-01	4535-06-01	0.0209943	0.0706327	0.0408882	MMP9	1
GO:1900120	regulation of receptor binding	2016-01-01	4535-06-01	0.0209943	0.0706327	0.0408882	MMP9	1
GO:1904705	regulation of vascular associated smooth muscle cell proliferation	2016-01-01	4535-06-01	0.0209943	0.0706327	0.0408882	MMP9	1
GO:1990000	amyloid fibril formation	2016-01-01	4535-06-01	0.0209943	0.0706327	0.0408882	CD36	1
GO:1990874	vascular associated smooth muscle cell proliferation	2016-01-01	4535-06-01	0.0209943	0.0706327	0.0408882	MMP9	1
GO:2001267	regulation of cysteine-type endopeptidase activity involved in apoptotic signaling pathway	2016-01-01	4535-06-01	0.0209943	0.0706327	0.0408882	MMP9	1
GO:0001934	positive regulation of protein phosphorylation	2016-03-01	176/4535	0.0221659	0.0742736	0.0429958	CD36/SERPINF2/MMP9	3
GO:2000026	regulation of multicellular organismal development	2016-04-01	323/4535	0.0231775	0.0767247	0.0444147	APOA1/VIM/MMP9/PGLYRP1	4
GO:0010631	epithelial cell migration	2016-02-01	68/4535	0.0232176	0.0767247	0.0444147	APOA1/MMP9	2
GO:0090132	epithelium migration	2016-02-01	68/4535	0.0232176	0.0767247	0.0444147	APOA1/MMP9	2
GO:0001990	regulation of systemic arterial blood pressure by hormone	2016-01-01	4535-07-01	0.0244529	0.0767247	0.0444147	SERPINF2	1
GO:0006957	complement activation, alternative pathway	2016-01-01	4535-07-01	0.0244529	0.0767247	0.0444147	CFB	1
GO:0010470	regulation of gastrulation	2016-01-01	4535-07-01	0.0244529	0.0767247	0.0444147	APOA1	1
GO:0019433	triglyceride catabolic process	2016-01-01	4535-07-01	0.0244529	0.0767247	0.0444147	APOC3	1
GO:0030194	positive regulation of blood coagulation	2016-01-01	4535-07-01	0.0244529	0.0767247	0.0444147	SERPINF2	1
GO:0031639	plasminogen activation	2016-01-01	4535-07-01	0.0244529	0.0767247	0.0444147	SERPINF2	1
GO:0042730	fibrinolysis	2016-01-01	4535-07-01	0.0244529	0.0767247	0.0444147	SERPINF2	1
GO:0045717	negative regulation of fatty acid biosynthetic process	2016-01-01	4535-07-01	0.0244529	0.0767247	0.0444147	APOC3	1
GO:0061844	antimicrobial humoral immune response mediated by antimicrobial peptide	2016-01-01	4535-07-01	0.0244529	0.0767247	0.0444147	PGLYRP1	1
GO:0090185	negative regulation of kidney development	2016-01-01	4535-07-01	0.0244529	0.0767247	0.0444147	MMP9	1
GO:1900026	positive regulation of substrate adhesion-dependent cell spreading	2016-01-01	4535-07-01	0.0244529	0.0767247	0.0444147	APOA1	1
GO:1900048	positive regulation of hemostasis	2016-01-01	4535-07-01	0.0244529	0.0767247	0.0444147	SERPINF2	1
GO:1905953	negative regulation of lipid localization	2016-01-01	4535-07-01	0.0244529	0.0767247	0.0444147	APOC3	1
GO:0007264	small GTPase mediated signal transduction	2016-02-01	70/4535	0.0245133	0.0767247	0.0444147	APOA1/APOC3	2
GO:0042327	positive regulation of phosphorylation	2016-03-01	183/4535	0.0245593	0.0767247	0.0444147	CD36/SERPINF2/MMP9	3
GO:1902533	positive regulation of intracellular signal transduction	2016-03-01	184/4535	0.0249124	0.0775365	0.0448846	APOA1/CD36/SERPINF2	3
GO:0090130	tissue migration	2016-02-01	72/4535	0.0258385	0.0798208	0.046207	APOA1/MMP9	2
GO:1901652	response to peptide	2016-02-01	72/4535	0.0258385	0.0798208	0.046207	VIM/MMP9	2
GO:0060429	epithelium development	2016-03-01	188/4535	0.0263532	0.0811093	0.0469529	VIM/MMP9/ACTG1	3
GO:1901698	response to nitrogen compound	2016-03-01	192/4535	0.027839	0.0827411	0.0478975	CD36/VIM/MMP9	3
GO:0003044	regulation of systemic arterial blood pressure mediated by a chemical signal	2016-01-01	4535-08-01	0.0279001	0.0827411	0.0478975	SERPINF2	1
GO:0010874	regulation of cholesterol efflux	2016-01-01	4535-08-01	0.0279001	0.0827411	0.0478975	APOA1	1
GO:0032814	regulation of natural killer cell activation	2016-01-01	4535-08-01	0.0279001	0.0827411	0.0478975	PGLYRP1	1
GO:0050766	positive regulation of phagocytosis	2016-01-01	4535-08-01	0.0279001	0.0827411	0.0478975	APOA1	1
GO:0050820	positive regulation of coagulation	2016-01-01	4535-08-01	0.0279001	0.0827411	0.0478975	SERPINF2	1
GO:0071634	regulation of transforming growth factor beta production	2016-01-01	4535-08-01	0.0279001	0.0827411	0.0478975	SERPINF2	1
GO:1900024	regulation of substrate adhesion-dependent cell spreading	2016-01-01	4535-08-01	0.0279001	0.0827411	0.0478975	APOA1	1
GO:2001258	negative regulation of cation channel activity	2016-01-01	4535-08-01	0.0279001	0.0827411	0.0478975	MMP9	1
GO:0019220	regulation of phosphate metabolic process	2016-04-01	342/4535	0.0279786	0.0827411	0.0478975	APOA1/CD36/SERPINF2/MMP9	4
GO:0051174	regulation of phosphorus metabolic process	2016-04-01	342/4535	0.0279786	0.0827411	0.0478975	APOA1/CD36/SERPINF2/MMP9	4
GO:0031399	regulation of protein modification process	2016-04-01	348/4535	0.0296133	0.0861876	0.0498926	APOA1/CD36/SERPINF2/MMP9	4
GO:0010562	positive regulation of phosphorus metabolic process	2016-03-01	198/4535	0.0301523	0.0861876	0.0498926	CD36/SERPINF2/MMP9	3
GO:0032101	regulation of response to external stimulus	2016-03-01	198/4535	0.0301523	0.0861876	0.0498926	APOA1/SERPINF2/PGLYRP1	3
GO:0045937	positive regulation of phosphate metabolic process	2016-03-01	198/4535	0.0301523	0.0861876	0.0498926	CD36/SERPINF2/MMP9	3
GO:0001738	morphogenesis of a polarized epithelium	2016-01-01	4535-09-01	0.0313358	0.0861876	0.0498926	ACTG1	1
GO:0007566	embryo implantation	2016-01-01	4535-09-01	0.0313358	0.0861876	0.0498926	MMP9	1
GO:0018158	protein oxidation	2016-01-01	4535-09-01	0.0313358	0.0861876	0.0498926	APOA1	1
GO:0032373	positive regulation of sterol transport	2016-01-01	4535-09-01	0.0313358	0.0861876	0.0498926	APOA1	1
GO:0032376	positive regulation of cholesterol transport	2016-01-01	4535-09-01	0.0313358	0.0861876	0.0498926	APOA1	1
GO:0045922	negative regulation of fatty acid metabolic process	2016-01-01	4535-09-01	0.0313358	0.0861876	0.0498926	APOC3	1
GO:0046579	positive regulation of Ras protein signal transduction	2016-01-01	4535-09-01	0.0313358	0.0861876	0.0498926	APOA1	1
GO:0050892	intestinal absorption	2016-01-01	4535-09-01	0.0313358	0.0861876	0.0498926	CD36	1
GO:0051057	positive regulation of small GTPase mediated signal transduction	2016-01-01	4535-09-01	0.0313358	0.0861876	0.0498926	APOA1	1
GO:0055081	anion homeostasis	2016-01-01	4535-09-01	0.0313358	0.0861876	0.0498926	APOA1	1
GO:0055094	response to lipoprotein particle	2016-01-01	4535-09-01	0.0313358	0.0861876	0.0498926	CD36	1
GO:0071402	cellular response to lipoprotein particle stimulus	2016-01-01	4535-09-01	0.0313358	0.0861876	0.0498926	CD36	1
GO:0071404	cellular response to low-density lipoprotein particle stimulus	2016-01-01	4535-09-01	0.0313358	0.0861876	0.0498926	CD36	1
GO:0071604	transforming growth factor beta production	2016-01-01	4535-09-01	0.0313358	0.0861876	0.0498926	SERPINF2	1
GO:0090200	positive regulation of release of cytochrome c from mitochondria	2016-01-01	4535-09-01	0.0313358	0.0861876	0.0498926	MMP9	1
GO:0097009	energy homeostasis	2016-01-01	4535-09-01	0.0313358	0.0861876	0.0498926	CD36	1
GO:0120192	tight junction assembly	2016-01-01	4535-09-01	0.0313358	0.0861876	0.0498926	ACTG1	1
GO:0042060	wound healing	2016-02-01	80/4535	0.0314258	0.0861876	0.0498926	SERPINF2/ACTG1	2
GO:0006468	protein phosphorylation	2016-04-01	356/4535	0.0318828	0.0871533	0.0504517	APOA1/CD36/SERPINF2/MMP9	4
GO:0001667	ameboidal-type cell migration	2016-02-01	81/4535	0.0321556	0.0876108	0.0507165	APOA1/MMP9	2
GO:0048598	embryonic morphogenesis	2016-02-01	82/4535	0.0328922	0.0893248	0.0517087	APOA1/MMP9	2
GO:0050727	regulation of inflammatory response	2016-02-01	84/4535	0.0343855	0.0911222	0.0527492	APOA1/PGLYRP1	2
GO:0051051	negative regulation of transport	2016-02-01	84/4535	0.0343855	0.0911222	0.0527492	APOC3/MMP9	2
GO:0030857	negative regulation of epithelial cell differentiation	2016-01-01	4535-10-01	0.0347602	0.0911222	0.0527492	MMP9	1
GO:0033209	tumor necrosis factor-mediated signaling pathway	2016-01-01	4535-10-01	0.0347602	0.0911222	0.0527492	APOA1	1
GO:0035850	epithelial cell differentiation involved in kidney development	2016-01-01	4535-10-01	0.0347602	0.0911222	0.0527492	MMP9	1
GO:0045620	negative regulation of lymphocyte differentiation	2016-01-01	4535-10-01	0.0347602	0.0911222	0.0527492	PGLYRP1	1
GO:0051055	negative regulation of lipid biosynthetic process	2016-01-01	4535-10-01	0.0347602	0.0911222	0.0527492	APOC3	1
GO:0070306	lens fiber cell differentiation	2016-01-01	4535-10-01	0.0347602	0.0911222	0.0527492	VIM	1
GO:0090183	regulation of kidney development	2016-01-01	4535-10-01	0.0347602	0.0911222	0.0527492	MMP9	1
GO:0120009	intermembrane lipid transfer	2016-01-01	4535-10-01	0.0347602	0.0911222	0.0527492	APOA1	1
GO:0120193	tight junction organization	2016-01-01	4535-10-01	0.0347602	0.0911222	0.0527492	ACTG1	1
GO:0031401	positive regulation of protein modification process	2016-03-01	211/4535	0.0355122	0.0928007	0.0537208	CD36/SERPINF2/MMP9	3
GO:0006811	ion transport	2016-04-01	372/4535	0.036734	0.0956925	0.0553949	APOA1/APOC3/CD36/MMP9	4
GO:0001960	negative regulation of cytokine-mediated signaling pathway	2016-01-01	4535-11-01	0.0381732	0.0967132	0.0559857	APOA1	1
GO:0007606	sensory perception of chemical stimulus	2016-01-01	4535-11-01	0.0381732	0.0967132	0.0559857	CD36	1
GO:0014002	astrocyte development	2016-01-01	4535-11-01	0.0381732	0.0967132	0.0559857	VIM	1
GO:0015909	long-chain fatty acid transport	2016-01-01	4535-11-01	0.0381732	0.0967132	0.0559857	CD36	1
GO:0034381	plasma lipoprotein particle clearance	2016-01-01	4535-11-01	0.0381732	0.0967132	0.0559857	APOC3	1
GO:0044070	regulation of anion transport	2016-01-01	4535-11-01	0.0381732	0.0967132	0.0559857	APOA1	1
GO:0048041	focal adhesion assembly	2016-01-01	4535-11-01	0.0381732	0.0967132	0.0559857	ACTG1	1
GO:0051893	regulation of focal adhesion assembly	2016-01-01	4535-11-01	0.0381732	0.0967132	0.0559857	ACTG1	1
GO:0090109	regulation of cell-substrate junction assembly	2016-01-01	4535-11-01	0.0381732	0.0967132	0.0559857	ACTG1	1
GO:0006508	proteolysis	2016-04-01	378/4535	0.0386616	0.0976528	0.0565296	PEBP1/SERPINF2/MMP9/CFB	4
GO:0052548	regulation of endopeptidase activity	2016-02-01	90/4535	0.0390236	0.0977332	0.0565762	PEBP1/MMP9	2
GO:0060627	regulation of vesicle-mediated transport	2016-02-01	90/4535	0.0390236	0.0977332	0.0565762	APOA1/APOC3	2
GO:0044092	negative regulation of molecular function	2016-03-01	219/4535	0.0390462	0.0977332	0.0565762	PEBP1/APOA1/MMP9	3
GO:0043410	positive regulation of MAPK cascade	2016-02-01	93/4535	0.041429	0.099278	0.0574704	CD36/SERPINF2	2
GO:0006801	superoxide metabolic process	2016-01-01	4535-12-01	0.0415749	0.099278	0.0574704	VIM	1
GO:0007044	cell-substrate junction assembly	2016-01-01	4535-12-01	0.0415749	0.099278	0.0574704	ACTG1	1
GO:0019730	antimicrobial humoral response	2016-01-01	4535-12-01	0.0415749	0.099278	0.0574704	PGLYRP1	1
GO:0030195	negative regulation of blood coagulation	2016-01-01	4535-12-01	0.0415749	0.099278	0.0574704	SERPINF2	1
GO:0032370	positive regulation of lipid transport	2016-01-01	4535-12-01	0.0415749	0.099278	0.0574704	APOA1	1
GO:0032413	negative regulation of ion transmembrane transporter activity	2016-01-01	4535-12-01	0.0415749	0.099278	0.0574704	MMP9	1
GO:0042058	regulation of epidermal growth factor receptor signaling pathway	2016-01-01	4535-12-01	0.0415749	0.099278	0.0574704	MMP9	1
GO:0045109	intermediate filament organization	2016-01-01	4535-12-01	0.0415749	0.099278	0.0574704	VIM	1
GO:0046461	neutral lipid catabolic process	2016-01-01	4535-12-01	0.0415749	0.099278	0.0574704	APOC3	1
GO:0046464	acylglycerol catabolic process	2016-01-01	4535-12-01	0.0415749	0.099278	0.0574704	APOC3	1
GO:0050829	defense response to Gram-negative bacterium	2016-01-01	4535-12-01	0.0415749	0.099278	0.0574704	CATHL1	1
GO:0060761	negative regulation of response to cytokine stimulus	2016-01-01	4535-12-01	0.0415749	0.099278	0.0574704	APOA1	1
GO:0070613	regulation of protein processing	2016-01-01	4535-12-01	0.0415749	0.099278	0.0574704	SERPINF2	1
GO:0150116	regulation of cell-substrate junction organization	2016-01-01	4535-12-01	0.0415749	0.099278	0.0574704	ACTG1	1
GO:1903317	regulation of protein maturation	2016-01-01	4535-12-01	0.0415749	0.099278	0.0574704	SERPINF2	1
GO:0009611	response to wounding	2016-02-01	96/4535	0.0438904	0.104084	0.0602526	SERPINF2/ACTG1	2
GO:0032269	negative regulation of cellular protein metabolic process	2016-03-01	231/4535	0.0446816	0.104084	0.0602526	PEBP1/SERPINF2/MMP9	3
GO:0001704	formation of primary germ layer	2016-01-01	13/4535	0.0449653	0.104084	0.0602526	MMP9	1
GO:0051180	vitamin transport	2016-01-01	13/4535	0.0449653	0.104084	0.0602526	APOA1	1
GO:0060395	SMAD protein signal transduction	2016-01-01	13/4535	0.0449653	0.104084	0.0602526	VIM	1
GO:0061005	cell differentiation involved in kidney development	2016-01-01	13/4535	0.0449653	0.104084	0.0602526	MMP9	1
GO:0070542	response to fatty acid	2016-01-01	13/4535	0.0449653	0.104084	0.0602526	CD36	1
GO:0150115	cell-substrate junction organization	2016-01-01	13/4535	0.0449653	0.104084	0.0602526	ACTG1	1
GO:1900047	negative regulation of hemostasis	2016-01-01	13/4535	0.0449653	0.104084	0.0602526	SERPINF2	1
GO:1901184	regulation of ERBB signaling pathway	2016-01-01	13/4535	0.0449653	0.104084	0.0602526	MMP9	1
GO:1904063	negative regulation of cation transmembrane transport	2016-01-01	13/4535	0.0449653	0.104084	0.0602526	MMP9	1
GO:0030335	positive regulation of cell migration	2016-02-01	99/4535	0.0464063	0.107121	0.0620108	MMP9/ACTG1	2
GO:0006897	endocytosis	2016-02-01	100/4535	0.0472569	0.107706	0.0623491	APOC3/CD36	2
GO:0052547	regulation of peptidase activity	2016-02-01	101/4535	0.0481133	0.107706	0.0623491	PEBP1/MMP9	2
GO:0006953	acute-phase response	2016-01-01	14/4535	0.0483445	0.107706	0.0623491	SERPINF2	1
GO:0007173	epidermal growth factor receptor signaling pathway	2016-01-01	14/4535	0.0483445	0.107706	0.0623491	MMP9	1
GO:0010770	positive regulation of cell morphogenesis involved in differentiation	2016-01-01	14/4535	0.0483445	0.107706	0.0623491	APOA1	1
GO:0010977	negative regulation of neuron projection development	2016-01-01	14/4535	0.0483445	0.107706	0.0623491	VIM	1
GO:0032410	negative regulation of transporter activity	2016-01-01	14/4535	0.0483445	0.107706	0.0623491	MMP9	1
GO:0034766	negative regulation of ion transmembrane transport	2016-01-01	14/4535	0.0483445	0.107706	0.0623491	MMP9	1
GO:0050819	negative regulation of coagulation	2016-01-01	14/4535	0.0483445	0.107706	0.0623491	SERPINF2	1
GO:0061045	negative regulation of wound healing	2016-01-01	14/4535	0.0483445	0.107706	0.0623491	SERPINF2	1
GO:0071346	cellular response to interferon-gamma	2016-01-01	14/4535	0.0483445	0.107706	0.0623491	VIM	1
GO:0090199	regulation of release of cytochrome c from mitochondria	2016-01-01	14/4535	0.0483445	0.107706	0.0623491	MMP9	1
GO:1903035	negative regulation of response to wounding	2016-01-01	14/4535	0.0483445	0.107706	0.0623491	SERPINF2	1
GO:0046486	glycerolipid metabolic process	2016-02-01	102/4535	0.0489756	0.10882	0.0629942	APOA1/APOC3	2
GO:0051248	negative regulation of protein metabolic process	2016-03-01	242/4535	0.0501961	0.111235	0.0643919	PEBP1/SERPINF2/MMP9	3
GO:2000147	positive regulation of cell motility	2016-02-01	104/4535	0.0507174	0.111618	0.064614	MMP9/ACTG1	2
GO:0003073	regulation of systemic arterial blood pressure	2016-01-01	15/4535	0.0517124	0.111618	0.064614	SERPINF2	1
GO:0015908	fatty acid transport	2016-01-01	15/4535	0.0517124	0.111618	0.064614	CD36	1
GO:0019835	cytolysis	2016-01-01	15/4535	0.0517124	0.111618	0.064614	CATHL1	1
GO:0030101	natural killer cell activation	2016-01-01	15/4535	0.0517124	0.111618	0.064614	PGLYRP1	1
GO:0030199	collagen fibril organization	2016-01-01	15/4535	0.0517124	0.111618	0.064614	SERPINF2	1
GO:0034446	substrate adhesion-dependent cell spreading	2016-01-01	15/4535	0.0517124	0.111618	0.064614	APOA1	1
GO:0035270	endocrine system development	2016-01-01	15/4535	0.0517124	0.111618	0.064614	APOA1	1
GO:0042304	regulation of fatty acid biosynthetic process	2016-01-01	15/4535	0.0517124	0.111618	0.064614	APOC3	1
GO:0046330	positive regulation of JNK cascade	2016-01-01	15/4535	0.0517124	0.111618	0.064614	SERPINF2	1
GO:0043269	regulation of ion transport	2016-02-01	106/4535	0.0524821	0.112694	0.0652368	APOA1/MMP9	2
GO:0051272	positive regulation of cellular component movement	2016-02-01	106/4535	0.0524821	0.112694	0.0652368	MMP9/ACTG1	2
GO:0002088	lens development in camera-type eye	2016-01-01	16/4535	0.0550692	0.116148	0.0672365	VIM	1
GO:0032611	interleukin-1 beta production	2016-01-01	16/4535	0.0550692	0.116148	0.0672365	CD36	1
GO:0043388	positive regulation of DNA binding	2016-01-01	16/4535	0.0550692	0.116148	0.0672365	MMP9	1
GO:0048708	astrocyte differentiation	2016-01-01	16/4535	0.0550692	0.116148	0.0672365	VIM	1
GO:0050764	regulation of phagocytosis	2016-01-01	16/4535	0.0550692	0.116148	0.0672365	APOA1	1
GO:0050886	endocrine process	2016-01-01	16/4535	0.0550692	0.116148	0.0672365	SERPINF2	1
GO:1902414	protein localization to cell junction	2016-01-01	16/4535	0.0550692	0.116148	0.0672365	ACTG1	1
GO:0007155	cell adhesion	2016-03-01	252/4535	0.0554949	0.11675	0.0675847	APOA1/CD36/ACTG1	3
GO:0016477	cell migration	2016-03-01	253/4535	0.0560396	0.116795	0.0676105	APOA1/MMP9/ACTG1	3
GO:0051336	regulation of hydrolase activity	2016-03-01	253/4535	0.0560396	0.116795	0.0676105	PEBP1/APOA1/MMP9	3
GO:0030855	epithelial cell differentiation	2016-02-01	110/4535	0.0560783	0.116795	0.0676105	VIM/MMP9	2
GO:0040017	positive regulation of locomotion	2016-02-01	110/4535	0.0560783	0.116795	0.0676105	MMP9/ACTG1	2
GO:0007166	cell surface receptor signaling pathway	2016-04-01	429/4535	0.0574734	0.118686	0.0687056	APOA1/CD36/VIM/MMP9	4
GO:0022610	biological adhesion	2016-03-01	256/4535	0.0576896	0.118686	0.0687056	APOA1/CD36/ACTG1	3
GO:0032649	regulation of interferon-gamma production	2016-01-01	17/4535	0.0584148	0.118686	0.0687056	PGLYRP1	1
GO:0034341	response to interferon-gamma	2016-01-01	17/4535	0.0584148	0.118686	0.0687056	VIM	1
GO:0034763	negative regulation of transmembrane transport	2016-01-01	17/4535	0.0584148	0.118686	0.0687056	MMP9	1
GO:0038127	ERBB signaling pathway	2016-01-01	17/4535	0.0584148	0.118686	0.0687056	MMP9	1
GO:0042572	retinol metabolic process	2016-01-01	17/4535	0.0584148	0.118686	0.0687056	TTR	1
GO:0043488	regulation of mRNA stability	2016-01-01	17/4535	0.0584148	0.118686	0.0687056	VIM	1
GO:0051250	negative regulation of lymphocyte activation	2016-01-01	17/4535	0.0584148	0.118686	0.0687056	PGLYRP1	1
GO:2000379	positive regulation of reactive oxygen species metabolic process	2016-01-01	17/4535	0.0584148	0.118686	0.0687056	VIM	1
GO:0031324	negative regulation of cellular metabolic process	2016-04-01	437/4535	0.0608211	0.122175	0.0707254	PEBP1/APOC3/SERPINF2/MMP9	4
GO:0001836	release of cytochrome c from mitochondria	2016-01-01	18/4535	0.0617493	0.122175	0.0707254	MMP9	1
GO:0001952	regulation of cell-matrix adhesion	2016-01-01	18/4535	0.0617493	0.122175	0.0707254	ACTG1	1
GO:0010811	positive regulation of cell-substrate adhesion	2016-01-01	18/4535	0.0617493	0.122175	0.0707254	APOA1	1
GO:0031638	zymogen activation	2016-01-01	18/4535	0.0617493	0.122175	0.0707254	SERPINF2	1
GO:0032612	interleukin-1 production	2016-01-01	18/4535	0.0617493	0.122175	0.0707254	CD36	1
GO:0043271	negative regulation of ion transport	2016-01-01	18/4535	0.0617493	0.122175	0.0707254	MMP9	1
GO:0045103	intermediate filament-based process	2016-01-01	18/4535	0.0617493	0.122175	0.0707254	VIM	1
GO:0045104	intermediate filament cytoskeleton organization	2016-01-01	18/4535	0.0617493	0.122175	0.0707254	VIM	1
GO:0046503	glycerolipid catabolic process	2016-01-01	18/4535	0.0617493	0.122175	0.0707254	APOC3	1
GO:0050830	defense response to Gram-positive bacterium	2016-01-01	18/4535	0.0617493	0.122175	0.0707254	CATHL1	1
GO:0060284	regulation of cell development	2016-02-01	117/4535	0.0625789	0.123523	0.0715053	APOA1/VIM	2
GO:0007043	cell-cell junction assembly	2016-01-01	19/4535	0.0650728	0.126345	0.0731388	ACTG1	1
GO:0007229	integrin-mediated signaling pathway	2016-01-01	19/4535	0.0650728	0.126345	0.0731388	APOA1	1
GO:0009308	amine metabolic process	2016-01-01	19/4535	0.0650728	0.126345	0.0731388	SAO	1
GO:0022600	digestive system process	2016-01-01	19/4535	0.0650728	0.126345	0.0731388	CD36	1
GO:0045665	negative regulation of neuron differentiation	2016-01-01	19/4535	0.0650728	0.126345	0.0731388	VIM	1
GO:0046470	phosphatidylcholine metabolic process	2016-01-01	19/4535	0.0650728	0.126345	0.0731388	APOA1	1
GO:0048259	regulation of receptor-mediated endocytosis	2016-01-01	19/4535	0.0650728	0.126345	0.0731388	APOC3	1
GO:0044255	cellular lipid metabolic process	2016-03-01	270/4535	0.0657042	0.127273	0.0736764	TTR/APOA1/APOC3	3
GO:0031347	regulation of defense response	2016-02-01	121/4535	0.0664072	0.128336	0.0742915	APOA1/PGLYRP1	2
GO:0010822	positive regulation of mitochondrion organization	2016-01-01	20/4535	0.0683852	0.13094	0.0757992	MMP9	1
GO:0043487	regulation of RNA stability	2016-01-01	20/4535	0.0683852	0.13094	0.0757992	VIM	1
GO:0045833	negative regulation of lipid metabolic process	2016-01-01	20/4535	0.0683852	0.13094	0.0757992	APOC3	1
GO:1905954	positive regulation of lipid localization	2016-01-01	20/4535	0.0683852	0.13094	0.0757992	APOA1	1
GO:0001817	regulation of cytokine production	2016-02-01	125/4535	0.0703147	0.133969	0.0775526	SERPINF2/PGLYRP1	2
GO:0002695	negative regulation of leukocyte activation	2016-01-01	21/4535	0.0716866	0.133969	0.0775526	PGLYRP1	1
GO:0002698	negative regulation of immune effector process	2016-01-01	21/4535	0.0716866	0.133969	0.0775526	PGLYRP1	1
GO:0019915	lipid storage	2016-01-01	21/4535	0.0716866	0.133969	0.0775526	APOA1	1
GO:0046328	regulation of JNK cascade	2016-01-01	21/4535	0.0716866	0.133969	0.0775526	SERPINF2	1
GO:0061013	regulation of mRNA catabolic process	2016-01-01	21/4535	0.0716866	0.133969	0.0775526	VIM	1
GO:1902106	negative regulation of leukocyte differentiation	2016-01-01	21/4535	0.0716866	0.133969	0.0775526	PGLYRP1	1
GO:2001243	negative regulation of intrinsic apoptotic signaling pathway	2016-01-01	21/4535	0.0716866	0.133969	0.0775526	MMP9	1
GO:2001257	regulation of cation channel activity	2016-01-01	21/4535	0.0716866	0.133969	0.0775526	MMP9	1
GO:0048870	cell motility	2016-03-01	280/4535	0.0717404	0.133969	0.0775526	APOA1/MMP9/ACTG1	3
GO:0051674	localization of cell	2016-03-01	280/4535	0.0717404	0.133969	0.0775526	APOA1/MMP9/ACTG1	3
GO:0009653	anatomical structure morphogenesis	2016-04-01	462/4535	0.0719752	0.134106	0.077632	APOA1/SERPINF2/MMP9/ACTG1	4
GO:0050776	regulation of immune response	2016-02-01	127/4535	0.0722974	0.134405	0.077805	CFB/PGLYRP1	2
GO:1901700	response to oxygen-containing compound	2016-03-01	283/4535	0.0736009	0.136523	0.0790311	CD36/VIM/MMP9	3
GO:0006956	complement activation	2016-01-01	22/4535	0.074977	0.137845	0.0797962	CFB	1
GO:0019217	regulation of fatty acid metabolic process	2016-01-01	22/4535	0.074977	0.137845	0.0797962	APOC3	1
GO:0031345	negative regulation of cell projection organization	2016-01-01	22/4535	0.074977	0.137845	0.0797962	VIM	1
GO:0032609	interferon-gamma production	2016-01-01	22/4535	0.074977	0.137845	0.0797962	PGLYRP1	1
GO:0030155	regulation of cell adhesion	2016-02-01	131/4535	0.0763189	0.139387	0.0806888	APOA1/ACTG1	2
GO:0043408	regulation of MAPK cascade	2016-02-01	131/4535	0.0763189	0.139387	0.0806888	CD36/SERPINF2	2
GO:0048514	blood vessel morphogenesis	2016-02-01	131/4535	0.0763189	0.139387	0.0806888	SERPINF2/ACTG1	2
GO:0001523	retinoid metabolic process	2016-01-01	23/4535	0.0782565	0.140456	0.0813078	TTR	1
GO:0007254	JNK cascade	2016-01-01	23/4535	0.0782565	0.140456	0.0813078	SERPINF2	1
GO:0016101	diterpenoid metabolic process	2016-01-01	23/4535	0.0782565	0.140456	0.0813078	TTR	1
GO:0022408	negative regulation of cell-cell adhesion	2016-01-01	23/4535	0.0782565	0.140456	0.0813078	APOA1	1
GO:0030193	regulation of blood coagulation	2016-01-01	23/4535	0.0782565	0.140456	0.0813078	SERPINF2	1
GO:0030856	regulation of epithelial cell differentiation	2016-01-01	23/4535	0.0782565	0.140456	0.0813078	MMP9	1
GO:0032092	positive regulation of protein binding	2016-01-01	23/4535	0.0782565	0.140456	0.0813078	MMP9	1
GO:0050777	negative regulation of immune response	2016-01-01	23/4535	0.0782565	0.140456	0.0813078	PGLYRP1	1
GO:0010629	negative regulation of gene expression	2016-03-01	294/4535	0.0806151	0.143837	0.0832651	SERPINF2/VIM/PGLYRP1	3
GO:0033993	response to lipid	2016-02-01	136/4535	0.0814476	0.143837	0.0832651	CD36/VIM	2
GO:0015718	monocarboxylic acid transport	2016-01-01	24/4535	0.0815251	0.143837	0.0832651	CD36	1
GO:0030100	regulation of endocytosis	2016-01-01	24/4535	0.0815251	0.143837	0.0832651	APOC3	1
GO:0030203	glycosaminoglycan metabolic process	2016-01-01	24/4535	0.0815251	0.143837	0.0832651	PGLYRP1	1
GO:0032874	positive regulation of stress-activated MAPK cascade	2016-01-01	24/4535	0.0815251	0.143837	0.0832651	SERPINF2	1
GO:0045995	regulation of embryonic development	2016-01-01	24/4535	0.0815251	0.143837	0.0832651	APOA1	1
GO:1900046	regulation of hemostasis	2016-01-01	24/4535	0.0815251	0.143837	0.0832651	SERPINF2	1
GO:0016310	phosphorylation	2016-04-01	484/4535	0.0826514	0.145516	0.0842366	APOA1/CD36/SERPINF2/MMP9	4
GO:0006022	aminoglycan metabolic process	2016-01-01	25/4535	0.0847828	0.14678	0.0849688	PGLYRP1	1
GO:0006641	triglyceride metabolic process	2016-01-01	25/4535	0.0847828	0.14678	0.0849688	APOC3	1
GO:0021782	glial cell development	2016-01-01	25/4535	0.0847828	0.14678	0.0849688	VIM	1
GO:0043154	negative regulation of cysteine-type endopeptidase activity involved in apoptotic process	2016-01-01	25/4535	0.0847828	0.14678	0.0849688	MMP9	1
GO:0050866	negative regulation of cell activation	2016-01-01	25/4535	0.0847828	0.14678	0.0849688	PGLYRP1	1
GO:0051101	regulation of DNA binding	2016-01-01	25/4535	0.0847828	0.14678	0.0849688	MMP9	1
GO:0070304	positive regulation of stress-activated protein kinase signaling cascade	2016-01-01	25/4535	0.0847828	0.14678	0.0849688	SERPINF2	1
GO:0098657	import into cell	2016-01-01	25/4535	0.0847828	0.14678	0.0849688	CD36	1
GO:0016192	vesicle-mediated transport	2016-03-01	302/4535	0.0859027	0.148383	0.0858964	APOA1/APOC3/CD36	3
GO:0050801	ion homeostasis	2016-02-01	141/4535	0.0866851	0.148383	0.0858964	APOA1/CD36	2
GO:0001959	regulation of cytokine-mediated signaling pathway	2016-01-01	26/4535	0.0880297	0.148383	0.0858964	APOA1	1
GO:0002526	acute inflammatory response	2016-01-01	26/4535	0.0880297	0.148383	0.0858964	SERPINF2	1
GO:0003014	renal system process	2016-01-01	26/4535	0.0880297	0.148383	0.0858964	SERPINF2	1
GO:0006721	terpenoid metabolic process	2016-01-01	26/4535	0.0880297	0.148383	0.0858964	TTR	1
GO:0007160	cell-matrix adhesion	2016-01-01	26/4535	0.0880297	0.148383	0.0858964	ACTG1	1
GO:0034308	primary alcohol metabolic process	2016-01-01	26/4535	0.0880297	0.148383	0.0858964	TTR	1
GO:0043534	blood vessel endothelial cell migration	2016-01-01	26/4535	0.0880297	0.148383	0.0858964	APOA1	1
GO:0045216	cell-cell junction organization	2016-01-01	26/4535	0.0880297	0.148383	0.0858964	ACTG1	1
GO:0050818	regulation of coagulation	2016-01-01	26/4535	0.0880297	0.148383	0.0858964	SERPINF2	1
GO:0062014	negative regulation of small molecule metabolic process	2016-01-01	26/4535	0.0880297	0.148383	0.0858964	APOC3	1
GO:0099173	postsynapse organization	2016-01-01	26/4535	0.0880297	0.148383	0.0858964	ACTG1	1
GO:0007167	enzyme linked receptor protein signaling pathway	2016-02-01	145/4535	0.0909501	0.152907	0.0885154	VIM/MMP9	2
GO:0007565	female pregnancy	2016-01-01	27/4535	0.0912658	0.152907	0.0885154	MMP9	1
GO:0042158	lipoprotein biosynthetic process	2016-01-01	27/4535	0.0912658	0.152907	0.0885154	APOA1	1
GO:0071345	cellular response to cytokine stimulus	2016-02-01	146/4535	0.0920264	0.153871	0.0890735	APOA1/VIM	2
GO:0010565	regulation of cellular ketone metabolic process	2016-01-01	28/4535	0.0944911	0.157044	0.0909104	APOC3	1
GO:0031623	receptor internalization	2016-01-01	28/4535	0.0944911	0.157044	0.0909104	CD36	1
GO:2000117	negative regulation of cysteine-type endopeptidase activity	2016-01-01	28/4535	0.0944911	0.157044	0.0909104	MMP9	1
GO:0000165	MAPK cascade	2016-02-01	149/4535	0.0952791	0.157409	0.0911218	CD36/SERPINF2	2
GO:0008284	positive regulation of cell population proliferation	2016-02-01	149/4535	0.0952791	0.157409	0.0911218	SERPINF2/MMP9	2
GO:0023014	signal transduction by protein phosphorylation	2016-02-01	149/4535	0.0952791	0.157409	0.0911218	CD36/SERPINF2	2
GO:0010769	regulation of cell morphogenesis involved in differentiation	2016-01-01	29/4535	0.0977057	0.15983	0.0925228	APOA1	1
GO:0034614	cellular response to reactive oxygen species	2016-01-01	29/4535	0.0977057	0.15983	0.0925228	MMP9	1
GO:0055088	lipid homeostasis	2016-01-01	29/4535	0.0977057	0.15983	0.0925228	APOA1	1
GO:0060759	regulation of response to cytokine stimulus	2016-01-01	29/4535	0.0977057	0.15983	0.0925228	APOA1	1
GO:0071356	cellular response to tumor necrosis factor	2016-01-01	29/4535	0.0977057	0.15983	0.0925228	APOA1	1
GO:0040011	locomotion	2016-03-01	320/4535	0.0983543	0.160575	0.092954	APOA1/MMP9/ACTG1	3
GO:0001568	blood vessel development	2016-02-01	152/4535	0.0985665	0.160605	0.0929719	SERPINF2/ACTG1	2
GO:1901888	regulation of cell junction assembly	2016-01-01	30/4535	0.10091	0.164102	0.0949958	ACTG1	1
GO:0051049	regulation of transport	2016-03-01	324/4535	0.101223	0.164289	0.0951043	APOA1/APOC3/MMP9	3
GO:0034612	response to tumor necrosis factor	2016-01-01	31/4535	0.104103	0.167979	0.0972406	APOA1	1
GO:0044706	multi-multicellular organism process	2016-01-01	31/4535	0.104103	0.167979	0.0972406	MMP9	1
GO:1903707	negative regulation of hemopoiesis	2016-01-01	31/4535	0.104103	0.167979	0.0972406	PGLYRP1	1
GO:0001944	vasculature development	2016-02-01	158/4535	0.105241	0.169488	0.0981137	SERPINF2/ACTG1	2
GO:0001818	negative regulation of cytokine production	2016-01-01	32/4535	0.107285	0.17145	0.0992499	PGLYRP1	1
GO:0010634	positive regulation of epithelial cell migration	2016-01-01	32/4535	0.107285	0.17145	0.0992499	MMP9	1
GO:0046474	glycerophospholipid biosynthetic process	2016-01-01	32/4535	0.107285	0.17145	0.0992499	APOA1	1
GO:0050768	negative regulation of neurogenesis	2016-01-01	32/4535	0.107285	0.17145	0.0992499	VIM	1
GO:0034097	response to cytokine	2016-02-01	160/4535	0.107495	0.171456	0.099253	APOA1/VIM	2
GO:0006928	movement of cell or subcellular component	2016-03-01	334/4535	0.108549	0.172804	0.100034	APOA1/MMP9/ACTG1	3
GO:0045597	positive regulation of cell differentiation	2016-02-01	162/4535	0.109763	0.174403	0.100959	APOA1/SERPINF2	2
GO:0007586	digestion	2016-01-01	33/4535	0.110457	0.174506	0.101019	CD36	1
GO:0034754	cellular hormone metabolic process	2016-01-01	33/4535	0.110457	0.174506	0.101019	TTR	1
GO:0045727	positive regulation of translation	2016-01-01	33/4535	0.110457	0.174506	0.101019	VIM	1
GO:0007186	G protein-coupled receptor signaling pathway	2016-02-01	163/4535	0.110901	0.174875	0.101232	APOA1/APOC3	2
GO:0035239	tube morphogenesis	2016-02-01	164/4535	0.112044	0.175824	0.101781	SERPINF2/ACTG1	2
GO:0009888	tissue development	2016-03-01	339/4535	0.112293	0.175824	0.101781	VIM/MMP9/ACTG1	3
GO:0008283	cell population proliferation	2016-03-01	340/4535	0.113049	0.175824	0.101781	APOA1/SERPINF2/MMP9	3
GO:0001935	endothelial cell proliferation	2016-01-01	34/4535	0.113619	0.175824	0.101781	APOA1	1
GO:0006720	isoprenoid metabolic process	2016-01-01	34/4535	0.113619	0.175824	0.101781	TTR	1
GO:0032872	regulation of stress-activated MAPK cascade	2016-01-01	34/4535	0.113619	0.175824	0.101781	SERPINF2	1
GO:0035150	regulation of tube size	2016-01-01	34/4535	0.113619	0.175824	0.101781	SERPINF2	1
GO:0035296	regulation of tube diameter	2016-01-01	34/4535	0.113619	0.175824	0.101781	SERPINF2	1
GO:0097746	regulation of blood vessel diameter	2016-01-01	34/4535	0.113619	0.175824	0.101781	SERPINF2	1
GO:0098742	cell-cell adhesion via plasma-membrane adhesion molecules	2016-01-01	34/4535	0.113619	0.175824	0.101781	APOA1	1
GO:0008610	lipid biosynthetic process	2016-02-01	167/4535	0.11549	0.178387	0.103265	APOA1/APOC3	2
GO:0008637	apoptotic mitochondrial changes	2016-01-01	35/4535	0.11677	0.179032	0.103639	MMP9	1
GO:0032412	regulation of ion transmembrane transporter activity	2016-01-01	35/4535	0.11677	0.179032	0.103639	MMP9	1
GO:0045619	regulation of lymphocyte differentiation	2016-01-01	35/4535	0.11677	0.179032	0.103639	PGLYRP1	1
GO:0070302	regulation of stress-activated protein kinase signaling cascade	2016-01-01	35/4535	0.11677	0.179032	0.103639	SERPINF2	1
GO:0006639	acylglycerol metabolic process	2016-01-01	36/4535	0.11991	0.1825	0.105647	APOC3	1
GO:0034250	positive regulation of cellular amide metabolic process	2016-01-01	36/4535	0.11991	0.1825	0.105647	VIM	1
GO:2000377	regulation of reactive oxygen species metabolic process	2016-01-01	36/4535	0.11991	0.1825	0.105647	VIM	1
GO:2001235	positive regulation of apoptotic signaling pathway	2016-01-01	36/4535	0.11991	0.1825	0.105647	MMP9	1
GO:0030334	regulation of cell migration	2016-02-01	173/4535	0.122469	0.185902	0.107616	MMP9/ACTG1	2
GO:0006638	neutral lipid metabolic process	2016-01-01	37/4535	0.12304	0.185902	0.107616	APOC3	1
GO:0051961	negative regulation of nervous system development	2016-01-01	37/4535	0.12304	0.185902	0.107616	VIM	1
GO:0071248	cellular response to metal ion	2016-01-01	37/4535	0.12304	0.185902	0.107616	MMP9	1
GO:0010821	regulation of mitochondrion organization	2016-01-01	38/4535	0.126159	0.189581	0.109746	MMP9	1
GO:0051403	stress-activated MAPK cascade	2016-01-01	38/4535	0.126159	0.189581	0.109746	SERPINF2	1
GO:1901136	carbohydrate derivative catabolic process	2016-01-01	38/4535	0.126159	0.189581	0.109746	PGLYRP1	1
GO:0002064	epithelial cell development	2016-01-01	39/4535	0.129268	0.192688	0.111544	VIM	1
GO:0007162	negative regulation of cell adhesion	2016-01-01	39/4535	0.129268	0.192688	0.111544	APOA1	1
GO:0022898	regulation of transmembrane transporter activity	2016-01-01	39/4535	0.129268	0.192688	0.111544	MMP9	1
GO:0031098	stress-activated protein kinase signaling cascade	2016-01-01	39/4535	0.129268	0.192688	0.111544	SERPINF2	1
GO:0006629	lipid metabolic process	2016-03-01	361/4535	0.129386	0.192688	0.111544	TTR/APOA1/APOC3	3
GO:0002252	immune effector process	2016-02-01	180/4535	0.130749	0.194369	0.112517	CFB/PGLYRP1	2
GO:0002285	lymphocyte activation involved in immune response	2016-01-01	40/4535	0.132367	0.194685	0.1127	PGLYRP1	1
GO:0003018	vascular process in circulatory system	2016-01-01	40/4535	0.132367	0.194685	0.1127	SERPINF2	1
GO:0007204	positive regulation of cytosolic calcium ion concentration	2016-01-01	40/4535	0.132367	0.194685	0.1127	CD36	1
GO:0008217	regulation of blood pressure	2016-01-01	40/4535	0.132367	0.194685	0.1127	SERPINF2	1
GO:0043112	receptor metabolic process	2016-01-01	40/4535	0.132367	0.194685	0.1127	CD36	1
GO:2001242	regulation of intrinsic apoptotic signaling pathway	2016-01-01	40/4535	0.132367	0.194685	0.1127	MMP9	1
GO:2000145	regulation of cell motility	2016-02-01	182/4535	0.13314	0.195476	0.113158	MMP9/ACTG1	2
GO:0000302	response to reactive oxygen species	2016-01-01	41/4535	0.135456	0.196789	0.113918	MMP9	1
GO:0010721	negative regulation of cell development	2016-01-01	41/4535	0.135456	0.196789	0.113918	VIM	1
GO:0030198	extracellular matrix organization	2016-01-01	41/4535	0.135456	0.196789	0.113918	SERPINF2	1
GO:0032409	regulation of transporter activity	2016-01-01	41/4535	0.135456	0.196789	0.113918	MMP9	1
GO:0043270	positive regulation of ion transport	2016-01-01	41/4535	0.135456	0.196789	0.113918	APOA1	1
GO:0071222	cellular response to lipopolysaccharide	2016-01-01	41/4535	0.135456	0.196789	0.113918	VIM	1
GO:0043062	extracellular structure organization	2016-01-01	42/4535	0.138534	0.200211	0.115899	SERPINF2	1
GO:0046890	regulation of lipid biosynthetic process	2016-01-01	42/4535	0.138534	0.200211	0.115899	APOC3	1
GO:0071241	cellular response to inorganic substance	2016-01-01	42/4535	0.138534	0.200211	0.115899	MMP9	1
GO:0051270	regulation of cellular component movement	2016-02-01	189/4535	0.141595	0.20428	0.118254	MMP9/ACTG1	2
GO:0040012	regulation of locomotion	2016-02-01	191/4535	0.144033	0.206904	0.119774	MMP9/ACTG1	2
GO:0010628	positive regulation of gene expression	2016-03-01	379/4535	0.144076	0.206904	0.119774	SERPINF2/VIM/ACTG1	3
GO:0008654	phospholipid biosynthetic process	2016-01-01	44/4535	0.144659	0.206904	0.119774	APOA1	1
GO:0010001	glial cell differentiation	2016-01-01	44/4535	0.144659	0.206904	0.119774	VIM	1
GO:0051480	regulation of cytosolic calcium ion concentration	2016-01-01	44/4535	0.144659	0.206904	0.119774	CD36	1
GO:0010975	regulation of neuron projection development	2016-01-01	45/4535	0.147706	0.210178	0.121669	VIM	1
GO:0050821	protein stabilization	2016-01-01	45/4535	0.147706	0.210178	0.121669	APOA1	1
GO:0051099	positive regulation of binding	2016-01-01	45/4535	0.147706	0.210178	0.121669	MMP9	1
GO:0043281	regulation of cysteine-type endopeptidase activity involved in apoptotic process	2016-01-01	46/4535	0.150743	0.214133	0.123958	MMP9	1
GO:0006402	mRNA catabolic process	2016-01-01	47/4535	0.15377	0.216949	0.125588	VIM	1
GO:0006909	phagocytosis	2016-01-01	47/4535	0.15377	0.216949	0.125588	APOA1	1
GO:0016485	protein processing	2016-01-01	47/4535	0.15377	0.216949	0.125588	SERPINF2	1
GO:0043393	regulation of protein binding	2016-01-01	47/4535	0.15377	0.216949	0.125588	MMP9	1
GO:0048646	anatomical structure formation involved in morphogenesis	2016-02-01	201/4535	0.156371	0.220244	0.127496	MMP9/ACTG1	2
GO:0001822	kidney development	2016-01-01	48/4535	0.156787	0.220457	0.127619	MMP9	1
GO:0007596	blood coagulation	2016-01-01	49/4535	0.159794	0.22355	0.12941	SERPINF2	1
GO:0007599	hemostasis	2016-01-01	49/4535	0.159794	0.22355	0.12941	SERPINF2	1
GO:0045017	glycerolipid biosynthetic process	2016-01-01	49/4535	0.159794	0.22355	0.12941	APOA1	1
GO:0035295	tube development	2016-02-01	204/4535	0.160116	0.223624	0.129452	SERPINF2/ACTG1	2
GO:0042180	cellular ketone metabolic process	2016-01-01	50/4535	0.162791	0.225465	0.130518	APOC3	1
GO:0042445	hormone metabolic process	2016-01-01	50/4535	0.162791	0.225465	0.130518	TTR	1
GO:0043010	camera-type eye development	2016-01-01	50/4535	0.162791	0.225465	0.130518	VIM	1
GO:0050817	coagulation	2016-01-01	50/4535	0.162791	0.225465	0.130518	SERPINF2	1
GO:0072001	renal system development	2016-01-01	50/4535	0.162791	0.225465	0.130518	MMP9	1
GO:0043933	protein-containing complex subunit organization	2016-03-01	402/4535	0.163687	0.22633	0.131019	APOA1/APOC3/CD36	3
GO:0051172	negative regulation of nitrogen compound metabolic process	2016-03-01	403/4535	0.16456	0.227158	0.131498	PEBP1/SERPINF2/MMP9	3
GO:0002253	activation of immune response	2016-01-01	51/4535	0.165777	0.227328	0.131597	CFB	1
GO:0031334	positive regulation of protein-containing complex assembly	2016-01-01	51/4535	0.165777	0.227328	0.131597	CD36	1
GO:0043542	endothelial cell migration	2016-01-01	51/4535	0.165777	0.227328	0.131597	APOA1	1
GO:2001234	negative regulation of apoptotic signaling pathway	2016-01-01	51/4535	0.165777	0.227328	0.131597	MMP9	1
GO:0072359	circulatory system development	2016-02-01	210/4535	0.167662	0.229533	0.132873	SERPINF2/ACTG1	2
GO:0032496	response to lipopolysaccharide	2016-01-01	52/4535	0.168754	0.229893	0.133081	VIM	1
GO:0044242	cellular lipid catabolic process	2016-01-01	52/4535	0.168754	0.229893	0.133081	APOC3	1
GO:0046942	carboxylic acid transport	2016-01-01	52/4535	0.168754	0.229893	0.133081	CD36	1
GO:0048878	chemical homeostasis	2016-02-01	213/4535	0.171461	0.23128	0.133884	APOA1/CD36	2
GO:0009914	hormone transport	2016-01-01	53/4535	0.171721	0.23128	0.133884	TTR	1
GO:0010038	response to metal ion	2016-01-01	53/4535	0.171721	0.23128	0.133884	MMP9	1
GO:0015849	organic acid transport	2016-01-01	53/4535	0.171721	0.23128	0.133884	CD36	1
GO:0042063	gliogenesis	2016-01-01	53/4535	0.171721	0.23128	0.133884	VIM	1
GO:1903311	regulation of mRNA metabolic process	2016-01-01	53/4535	0.171721	0.23128	0.133884	VIM	1
GO:2000116	regulation of cysteine-type endopeptidase activity	2016-01-01	53/4535	0.171721	0.23128	0.133884	MMP9	1
GO:0001655	urogenital system development	2016-01-01	54/4535	0.174678	0.234882	0.135969	MMP9	1
GO:1901701	cellular response to oxygen-containing compound	2016-02-01	216/4535	0.175277	0.235308	0.136216	VIM/MMP9	2
GO:0034329	cell junction assembly	2016-01-01	55/4535	0.177625	0.238074	0.137817	ACTG1	1
GO:0006401	RNA catabolic process	2016-01-01	56/4535	0.180562	0.240845	0.139422	VIM	1
GO:0010632	regulation of epithelial cell migration	2016-01-01	56/4535	0.180562	0.240845	0.139422	MMP9	1
GO:0050808	synapse organization	2016-01-01	56/4535	0.180562	0.240845	0.139422	ACTG1	1
GO:0009968	negative regulation of signal transduction	2016-02-01	221/4535	0.181673	0.241939	0.140055	APOA1/MMP9	2
GO:0006633	fatty acid biosynthetic process	2016-01-01	57/4535	0.183489	0.243188	0.140778	APOC3	1
GO:0045664	regulation of neuron differentiation	2016-01-01	57/4535	0.183489	0.243188	0.140778	VIM	1
GO:1901653	cellular response to peptide	2016-01-01	57/4535	0.183489	0.243188	0.140778	VIM	1
GO:0002366	leukocyte activation involved in immune response	2016-01-01	58/4535	0.186406	0.245879	0.142335	PGLYRP1	1
GO:0072593	reactive oxygen species metabolic process	2016-01-01	58/4535	0.186406	0.245879	0.142335	VIM	1
GO:1902105	regulation of leukocyte differentiation	2016-01-01	58/4535	0.186406	0.245879	0.142335	PGLYRP1	1
GO:0002263	cell activation involved in immune response	2016-01-01	59/4535	0.189314	0.247748	0.143417	PGLYRP1	1
GO:0007178	transmembrane receptor protein serine/threonine kinase signaling pathway	2016-01-01	59/4535	0.189314	0.247748	0.143417	VIM	1
GO:0034599	cellular response to oxidative stress	2016-01-01	59/4535	0.189314	0.247748	0.143417	MMP9	1
GO:0051604	protein maturation	2016-01-01	59/4535	0.189314	0.247748	0.143417	SERPINF2	1
GO:1904062	regulation of cation transmembrane transport	2016-01-01	59/4535	0.189314	0.247748	0.143417	MMP9	1
GO:0001654	eye development	2016-01-01	61/4535	0.1951	0.254918	0.147568	VIM	1
GO:0150063	visual system development	2016-01-01	63/4535	0.200847	0.262016	0.151677	VIM	1
GO:0010720	positive regulation of cell development	2016-01-01	64/4535	0.203706	0.263677	0.152638	APOA1	1
GO:0048880	sensory system development	2016-01-01	64/4535	0.203706	0.263677	0.152638	VIM	1
GO:0097193	intrinsic apoptotic signaling pathway	2016-01-01	64/4535	0.203706	0.263677	0.152638	MMP9	1
GO:0010648	negative regulation of cell communication	2016-02-01	238/4535	0.203707	0.263677	0.152638	APOA1/MMP9	2
GO:0023057	negative regulation of signaling	2016-02-01	238/4535	0.203707	0.263677	0.152638	APOA1/MMP9	2
GO:0051094	positive regulation of developmental process	2016-02-01	242/4535	0.208948	0.27004	0.156322	APOA1/SERPINF2	2
GO:0048732	gland development	2016-01-01	66/4535	0.209396	0.270199	0.156414	APOA1	1
GO:0030098	lymphocyte differentiation	2016-01-01	68/4535	0.215048	0.276205	0.159891	PGLYRP1	1
GO:0051235	maintenance of location	2016-01-01	68/4535	0.215048	0.276205	0.159891	APOA1	1
GO:0062197	cellular response to chemical stress	2016-01-01	68/4535	0.215048	0.276205	0.159891	MMP9	1
GO:0072330	monocarboxylic acid biosynthetic process	2016-01-01	69/4535	0.217859	0.279384	0.161731	APOC3	1
GO:0050790	regulation of catalytic activity	2016-03-01	462/4535	0.21857	0.279864	0.162009	PEBP1/APOA1/MMP9	3
GO:0006874	cellular calcium ion homeostasis	2016-01-01	70/4535	0.220661	0.282107	0.163307	CD36	1
GO:0031647	regulation of protein stability	2016-01-01	71/4535	0.223454	0.285239	0.16512	APOA1	1
GO:0009057	macromolecule catabolic process	2016-02-01	254/4535	0.224775	0.286485	0.165842	VIM/PGLYRP1	2
GO:1901575	organic substance catabolic process	2016-03-01	469/4535	0.225264	0.286668	0.165947	APOC3/VIM/PGLYRP1	3
GO:0001701	in utero embryonic development	2016-01-01	72/4535	0.226237	0.287028	0.166156	VIM	1
GO:0055074	calcium ion homeostasis	2016-01-01	72/4535	0.226237	0.287028	0.166156	CD36	1
GO:0002697	regulation of immune effector process	2016-01-01	73/4535	0.229011	0.288784	0.167172	PGLYRP1	1
GO:0008202	steroid metabolic process	2016-01-01	73/4535	0.229011	0.288784	0.167172	APOA1	1
GO:0051098	regulation of binding	2016-01-01	73/4535	0.229011	0.288784	0.167172	MMP9	1
GO:0072503	cellular divalent inorganic cation homeostasis	2016-01-01	73/4535	0.229011	0.288784	0.167172	CD36	1
GO:0002682	regulation of immune system process	2016-02-01	259/4535	0.23141	0.290945	0.168424	CFB/PGLYRP1	2
GO:0022604	regulation of cell morphogenesis	2016-01-01	74/4535	0.231776	0.290945	0.168424	APOA1	1
GO:0062012	regulation of small molecule metabolic process	2016-01-01	74/4535	0.231776	0.290945	0.168424	APOC3	1
GO:0019221	cytokine-mediated signaling pathway	2016-01-01	75/4535	0.234531	0.293517	0.169913	APOA1	1
GO:0072507	divalent inorganic cation homeostasis	2016-01-01	75/4535	0.234531	0.293517	0.169913	CD36	1
GO:0002009	morphogenesis of an epithelium	2016-01-01	76/4535	0.237277	0.296062	0.171386	ACTG1	1
GO:0034655	nucleobase-containing compound catabolic process	2016-01-01	76/4535	0.237277	0.296062	0.171386	VIM	1
GO:0006650	glycerophospholipid metabolic process	2016-01-01	77/4535	0.240014	0.299028	0.173103	APOA1	1
GO:0002683	negative regulation of immune system process	2016-01-01	78/4535	0.242742	0.301522	0.174547	PGLYRP1	1
GO:0034765	regulation of ion transmembrane transport	2016-01-01	78/4535	0.242742	0.301522	0.174547	MMP9	1
GO:0009719	response to endogenous stimulus	2016-02-01	270/4535	0.246071	0.305201	0.176676	CD36/VIM	2
GO:0042127	regulation of cell population proliferation	2016-02-01	271/4535	0.247407	0.306402	0.177371	SERPINF2/MMP9	2
GO:0051249	regulation of lymphocyte activation	2016-01-01	82/4535	0.253561	0.313555	0.181512	PGLYRP1	1
GO:0022407	regulation of cell-cell adhesion	2016-01-01	83/4535	0.256243	0.315932	0.182888	APOA1	1
GO:2001233	regulation of apoptotic signaling pathway	2016-01-01	83/4535	0.256243	0.315932	0.182888	MMP9	1
GO:0001501	skeletal system development	2016-01-01	84/4535	0.258916	0.318283	0.184249	MMP9	1
GO:0050767	regulation of neurogenesis	2016-01-01	84/4535	0.258916	0.318283	0.184249	VIM	1
GO:0007169	transmembrane receptor protein tyrosine kinase signaling pathway	2016-01-01	85/4535	0.26158	0.319666	0.18505	MMP9	1
GO:0010035	response to inorganic substance	2016-01-01	85/4535	0.26158	0.319666	0.18505	MMP9	1
GO:0019216	regulation of lipid metabolic process	2016-01-01	85/4535	0.26158	0.319666	0.18505	APOC3	1
GO:0045785	positive regulation of cell adhesion	2016-01-01	85/4535	0.26158	0.319666	0.18505	APOA1	1
GO:0044403	symbiotic process	2016-01-01	86/4535	0.264235	0.322436	0.186653	PGLYRP1	1
GO:0001819	positive regulation of cytokine production	2016-01-01	87/4535	0.266881	0.323764	0.187422	SERPINF2	1
GO:0032103	positive regulation of response to external stimulus	2016-01-01	87/4535	0.266881	0.323764	0.187422	SERPINF2	1
GO:0043254	regulation of protein-containing complex assembly	2016-01-01	87/4535	0.266881	0.323764	0.187422	CD36	1
GO:1903706	regulation of hemopoiesis	2016-01-01	87/4535	0.266881	0.323764	0.187422	PGLYRP1	1
GO:0048871	multicellular organismal homeostasis	2016-01-01	88/4535	0.269518	0.326486	0.188998	CD36	1
GO:0006066	alcohol metabolic process	2016-01-01	89/4535	0.272146	0.327284	0.18946	TTR	1
GO:0007423	sensory organ development	2016-01-01	89/4535	0.272146	0.327284	0.18946	VIM	1
GO:0044270	cellular nitrogen compound catabolic process	2016-01-01	89/4535	0.272146	0.327284	0.18946	VIM	1
GO:0050878	regulation of body fluid levels	2016-01-01	89/4535	0.272146	0.327284	0.18946	SERPINF2	1
GO:0120035	regulation of plasma membrane bounded cell projection organization	2016-01-01	89/4535	0.272146	0.327284	0.18946	VIM	1
GO:0006875	cellular metal ion homeostasis	2016-01-01	90/4535	0.274766	0.329006	0.190456	CD36	1
GO:0046700	heterocycle catabolic process	2016-01-01	90/4535	0.274766	0.329006	0.190456	VIM	1
GO:0050673	epithelial cell proliferation	2016-01-01	90/4535	0.274766	0.329006	0.190456	APOA1	1
GO:0016042	lipid catabolic process	2016-01-01	91/4535	0.277376	0.331178	0.191713	APOC3	1
GO:0031344	regulation of cell projection organization	2016-01-01	91/4535	0.277376	0.331178	0.191713	VIM	1
GO:0000904	cell morphogenesis involved in differentiation	2016-01-01	92/4535	0.279978	0.332849	0.192681	APOA1	1
GO:0006417	regulation of translation	2016-01-01	92/4535	0.279978	0.332849	0.192681	VIM	1
GO:0034762	regulation of transmembrane transport	2016-01-01	92/4535	0.279978	0.332849	0.192681	MMP9	1
GO:0090066	regulation of anatomical structure size	2016-01-01	93/4535	0.282571	0.335452	0.194188	SERPINF2	1
GO:0002694	regulation of leukocyte activation	2016-01-01	94/4535	0.285155	0.337555	0.195405	PGLYRP1	1
GO:0050778	positive regulation of immune response	2016-01-01	94/4535	0.285155	0.337555	0.195405	CFB	1
GO:0006979	response to oxidative stress	2016-01-01	95/4535	0.28773	0.339636	0.19661	MMP9	1
GO:0034330	cell junction organization	2016-01-01	95/4535	0.28773	0.339636	0.19661	ACTG1	1
GO:0051240	positive regulation of multicellular organismal process	2016-02-01	302/4535	0.289023	0.340678	0.197213	SERPINF2/MMP9	2
GO:0048729	tissue morphogenesis	2016-01-01	97/4535	0.292855	0.344706	0.199545	ACTG1	1
GO:0019439	aromatic compound catabolic process	2016-01-01	98/4535	0.295405	0.347215	0.200997	VIM	1
GO:0071396	cellular response to lipid	2016-01-01	100/4535	0.300478	0.352679	0.20416	VIM	1
GO:0008015	blood circulation	2016-01-01	101/4535	0.303001	0.35464	0.205295	SERPINF2	1
GO:0051960	regulation of nervous system development	2016-01-01	101/4535	0.303001	0.35464	0.205295	VIM	1
GO:0003013	circulatory system process	2016-01-01	102/4535	0.305516	0.355083	0.205552	SERPINF2	1
GO:0006631	fatty acid metabolic process	2016-01-01	102/4535	0.305516	0.355083	0.205552	APOC3	1
GO:0010817	regulation of hormone levels	2016-01-01	102/4535	0.305516	0.355083	0.205552	TTR	1
GO:0034248	regulation of cellular amide metabolic process	2016-01-01	102/4535	0.305516	0.355083	0.205552	VIM	1
GO:0043009	chordate embryonic development	2016-01-01	102/4535	0.305516	0.355083	0.205552	VIM	1
GO:0010557	positive regulation of macromolecule biosynthetic process	2016-02-01	316/4535	0.307848	0.3565	0.206372	SERPINF2/VIM	2
GO:0046394	carboxylic acid biosynthetic process	2016-01-01	103/4535	0.308023	0.3565	0.206372	APOC3	1
GO:1902532	negative regulation of intracellular signal transduction	2016-01-01	103/4535	0.308023	0.3565	0.206372	MMP9	1
GO:0002521	leukocyte differentiation	2016-01-01	104/4535	0.310521	0.3574	0.206893	PGLYRP1	1
GO:0016053	organic acid biosynthetic process	2016-01-01	104/4535	0.310521	0.3574	0.206893	APOC3	1
GO:0050865	regulation of cell activation	2016-01-01	104/4535	0.310521	0.3574	0.206893	PGLYRP1	1
GO:1901361	organic cyclic compound catabolic process	2016-01-01	104/4535	0.310521	0.3574	0.206893	VIM	1
GO:0009792	embryo development ending in birth or egg hatching	2016-01-01	105/4535	0.313011	0.358775	0.207689	VIM	1
GO:0030003	cellular cation homeostasis	2016-01-01	105/4535	0.313011	0.358775	0.207689	CD36	1
GO:0055065	metal ion homeostasis	2016-01-01	105/4535	0.313011	0.358775	0.207689	CD36	1
GO:0006935	chemotaxis	2016-01-01	106/4535	0.315492	0.361121	0.209047	APOA1	1
GO:0006644	phospholipid metabolic process	2016-01-01	107/4535	0.317965	0.362952	0.210107	APOA1	1
GO:0042330	taxis	2016-01-01	107/4535	0.317965	0.362952	0.210107	APOA1	1
GO:0006873	cellular ion homeostasis	2016-01-01	108/4535	0.320429	0.365263	0.211445	CD36	1
GO:0003008	system process	2016-02-01	327/4535	0.322614	0.367056	0.212483	CD36/SERPINF2	2
GO:0071417	cellular response to organonitrogen compound	2016-01-01	109/4535	0.322885	0.367056	0.212483	VIM	1
GO:0048468	cell development	2016-02-01	328/4535	0.323954	0.367768	0.212895	APOA1/VIM	2
GO:0031328	positive regulation of cellular biosynthetic process	2016-02-01	333/4535	0.33065	0.374857	0.216999	SERPINF2/VIM	2
GO:0043065	positive regulation of apoptotic process	2016-01-01	113/4535	0.332627	0.376072	0.217702	MMP9	1
GO:0043068	positive regulation of programmed cell death	2016-01-01	113/4535	0.332627	0.376072	0.217702	MMP9	1
GO:0001525	angiogenesis	2016-01-01	115/4535	0.337448	0.381004	0.220557	ACTG1	1
GO:0031175	neuron projection development	2016-01-01	116/4535	0.339846	0.383192	0.221824	VIM	1
GO:0009891	positive regulation of biosynthetic process	2016-02-01	345/4535	0.346673	0.389831	0.225667	SERPINF2/VIM	2
GO:0042592	homeostatic process	2016-02-01	345/4535	0.346673	0.389831	0.225667	APOA1/CD36	2
GO:0007600	sensory perception	2016-01-01	120/4535	0.349359	0.391791	0.226802	CD36	1
GO:0010608	posttranscriptional regulation of gene expression	2016-01-01	120/4535	0.349359	0.391791	0.226802	VIM	1
GO:0010942	positive regulation of cell death	2016-01-01	121/4535	0.351717	0.393374	0.227718	MMP9	1
GO:0055080	cation homeostasis	2016-01-01	121/4535	0.351717	0.393374	0.227718	CD36	1
GO:0098771	inorganic ion homeostasis	2016-01-01	123/4535	0.356409	0.398085	0.230445	CD36	1
GO:0007417	central nervous system development	2016-01-01	125/4535	0.361069	0.402209	0.232832	VIM	1
GO:0090407	organophosphate biosynthetic process	2016-01-01	125/4535	0.361069	0.402209	0.232832	APOA1	1
GO:0097190	apoptotic signaling pathway	2016-01-01	126/4535	0.363387	0.404249	0.234014	MMP9	1
GO:0046649	lymphocyte activation	2016-01-01	127/4535	0.365697	0.406276	0.235186	PGLYRP1	1
GO:0031329	regulation of cellular catabolic process	2016-01-01	128/4535	0.367999	0.408288	0.236351	VIM	1
GO:0080135	regulation of cellular response to stress	2016-01-01	131/4535	0.374859	0.414791	0.240116	SERPINF2	1
GO:1901699	cellular response to nitrogen compound	2016-01-01	131/4535	0.374859	0.414791	0.240116	VIM	1
GO:0055082	cellular chemical homeostasis	2016-01-01	132/4535	0.377131	0.416196	0.240929	CD36	1
GO:1901615	organic hydroxy compound metabolic process	2016-01-01	132/4535	0.377131	0.416196	0.240929	TTR	1
GO:0098609	cell-cell adhesion	2016-01-01	135/4535	0.383898	0.423102	0.244927	APOA1	1
GO:0061024	membrane organization	2016-01-01	137/4535	0.388371	0.427465	0.247453	APOA1	1
GO:0048666	neuron development	2016-01-01	143/4535	0.401608	0.44145	0.255549	VIM	1
GO:0033554	cellular response to stress	2016-02-01	394/4535	0.411012	0.451191	0.261187	SERPINF2/MMP9	2
GO:0000902	cell morphogenesis	2016-01-01	152/4535	0.420962	0.460895	0.266805	APOA1	1
GO:0007005	mitochondrion organization	2016-01-01	152/4535	0.420962	0.460895	0.266805	MMP9	1
GO:0055114	oxidation-reduction process	2016-02-01	409/4535	0.430236	0.470429	0.272324	APOA1/SAO	2
GO:0045321	leukocyte activation	2016-01-01	157/4535	0.431458	0.471146	0.272739	PGLYRP1	1
GO:0032787	monocarboxylic acid metabolic process	2016-01-01	159/4535	0.435607	0.475051	0.275	APOC3	1
GO:0045944	positive regulation of transcription by RNA polymerase II	2016-01-01	160/4535	0.43767	0.476676	0.27594	SERPINF2	1
GO:0009894	regulation of catabolic process	2016-01-01	161/4535	0.439727	0.478289	0.276874	VIM	1
GO:0019725	cellular homeostasis	2016-01-01	162/4535	0.441776	0.47989	0.277801	CD36	1
GO:0071310	cellular response to organic substance	2016-02-01	420/4535	0.444162	0.481852	0.278936	APOA1/VIM	2
GO:0051050	positive regulation of transport	2016-01-01	165/4535	0.447883	0.485255	0.280906	APOA1	1
GO:0030097	hemopoiesis	2016-01-01	166/4535	0.449904	0.48681	0.281807	PGLYRP1	1
GO:0030182	neuron differentiation	2016-01-01	167/4535	0.451919	0.488354	0.2827	VIM	1
GO:0002684	positive regulation of immune system process	2016-01-01	170/4535	0.457921	0.494198	0.286083	CFB	1
GO:0016071	mRNA metabolic process	2016-01-01	174/4535	0.465828	0.501429	0.290269	VIM	1
GO:0048534	hematopoietic or lymphoid organ development	2016-01-01	174/4535	0.465828	0.501429	0.290269	PGLYRP1	1
GO:0040007	growth	2016-01-01	175/4535	0.467788	0.502887	0.291113	PGLYRP1	1
GO:0043066	negative regulation of apoptotic process	2016-01-01	176/4535	0.469741	0.503683	0.291574	MMP9	1
GO:0050877	nervous system process	2016-01-01	176/4535	0.469741	0.503683	0.291574	CD36	1
GO:0098655	cation transmembrane transport	2016-01-01	177/4535	0.471687	0.505119	0.292405	MMP9	1
GO:0044248	cellular catabolic process	2016-02-01	444/4535	0.473992	0.506933	0.293456	APOC3/VIM	2
GO:0002520	immune system development	2016-01-01	180/4535	0.477486	0.510014	0.295239	PGLYRP1	1
GO:0043069	negative regulation of programmed cell death	2016-01-01	181/4535	0.479406	0.511407	0.296045	MMP9	1
GO:0044283	small molecule biosynthetic process	2016-01-01	183/4535	0.483225	0.514821	0.298022	APOC3	1
GO:0022603	regulation of anatomical structure morphogenesis	2016-01-01	184/4535	0.485125	0.516183	0.29881	APOA1	1
GO:0001775	cell activation	2016-01-01	185/4535	0.487019	0.517535	0.299593	PGLYRP1	1
GO:0060548	negative regulation of cell death	2016-01-01	192/4535	0.500091	0.530747	0.307241	MMP9	1
GO:0048699	generation of neurons	2016-01-01	199/4535	0.51285	0.543594	0.314678	VIM	1
GO:1901566	organonitrogen compound biosynthetic process	2016-02-01	496/4535	0.535695	0.567086	0.328277	APOA1/VIM	2
GO:0031327	negative regulation of cellular biosynthetic process	2016-01-01	213/4535	0.537457	0.567506	0.32852	APOC3	1
GO:0044703	multi-organism reproductive process	2016-01-01	213/4535	0.537457	0.567506	0.32852	MMP9	1
GO:0051704	multi-organism process	2016-01-01	216/4535	0.542576	0.571459	0.330808	MMP9	1
GO:0120036	plasma membrane bounded cell projection organization	2016-01-01	216/4535	0.542576	0.571459	0.330808	VIM	1
GO:0044265	cellular macromolecule catabolic process	2016-01-01	218/4535	0.54596	0.574294	0.33245	VIM	1
GO:0009890	negative regulation of biosynthetic process	2016-01-01	223/4535	0.554315	0.582346	0.337111	APOC3	1
GO:0022008	neurogenesis	2016-01-01	227/4535	0.560896	0.587774	0.340253	VIM	1
GO:0030030	cell projection organization	2016-01-01	227/4535	0.560896	0.587774	0.340253	VIM	1
GO:0045893	positive regulation of transcription, DNA-templated	2016-01-01	229/4535	0.564152	0.590441	0.341797	SERPINF2	1
GO:0071495	cellular response to endogenous stimulus	2016-01-01	233/4535	0.570596	0.596434	0.345266	VIM	1
GO:0034220	ion transmembrane transport	2016-01-01	234/4535	0.572193	0.597352	0.345798	MMP9	1
GO:0034622	cellular protein-containing complex assembly	2016-01-01	236/4535	0.575371	0.599916	0.347282	CD36	1
GO:0006412	translation	2016-01-01	238/4535	0.578526	0.60245	0.348749	VIM	1
GO:0006812	cation transport	2016-01-01	242/4535	0.58477	0.608191	0.352072	MMP9	1
GO:0043043	peptide biosynthetic process	2016-01-01	243/4535	0.586318	0.609038	0.352562	VIM	1
GO:1901135	carbohydrate derivative metabolic process	2016-01-01	247/4535	0.592454	0.614644	0.355807	PGLYRP1	1
GO:0019637	organophosphate metabolic process	2016-01-01	249/4535	0.59549	0.617023	0.357185	APOA1	1
GO:0018193	peptidyl-amino acid modification	2016-01-01	250/4535	0.597	0.617817	0.357645	APOA1	1
GO:1902680	positive regulation of RNA biosynthetic process	2016-01-01	257/4535	0.607424	0.627043	0.362985	SERPINF2	1
GO:1903508	positive regulation of nucleic acid-templated transcription	2016-01-01	257/4535	0.607424	0.627043	0.362985	SERPINF2	1
GO:0043604	amide biosynthetic process	2016-01-01	270/4535	0.626114	0.645535	0.37369	VIM	1
GO:0006357	regulation of transcription by RNA polymerase II	2016-01-01	274/4535	0.631695	0.650482	0.376554	SERPINF2	1
GO:0006518	peptide metabolic process	2016-01-01	275/4535	0.633078	0.651099	0.376911	VIM	1
GO:0019752	carboxylic acid metabolic process	2016-01-01	277/4535	0.63583	0.652314	0.377614	APOC3	1
GO:0051254	positive regulation of RNA metabolic process	2016-01-01	277/4535	0.63583	0.652314	0.377614	SERPINF2	1
GO:1901565	organonitrogen compound catabolic process	2016-01-01	283/4535	0.643968	0.659849	0.381976	PGLYRP1	1
GO:0042981	regulation of apoptotic process	2016-01-01	284/4535	0.645308	0.660148	0.382149	MMP9	1
GO:0000003	reproduction	2016-01-01	285/4535	0.646643	0.660148	0.382149	MMP9	1
GO:0022414	reproductive process	2016-01-01	285/4535	0.646643	0.660148	0.382149	MMP9	1
GO:0043436	oxoacid metabolic process	2016-01-01	286/4535	0.647973	0.660694	0.382465	APOC3	1
GO:0043067	regulation of programmed cell death	2016-01-01	290/4535	0.653248	0.665256	0.385106	MMP9	1
GO:0006082	organic acid metabolic process	2016-01-01	292/4535	0.655857	0.667096	0.386171	APOC3	1
GO:0006366	transcription by RNA polymerase II	2016-01-01	301/4535	0.667373	0.677979	0.392471	SERPINF2	1
GO:0010941	regulation of cell death	2016-01-01	308/4535	0.676078	0.685984	0.397105	MMP9	1
GO:0045935	positive regulation of nucleobase-containing compound metabolic process	2016-01-01	315/4535	0.68457	0.693753	0.401603	SERPINF2	1
GO:0044093	positive regulation of molecular function	2016-01-01	317/4535	0.686958	0.695325	0.402513	MMP9	1
GO:0007399	nervous system development	2016-01-01	331/4535	0.703203	0.710902	0.41153	VIM	1
GO:0043603	cellular amide metabolic process	2016-01-01	340/4535	0.713225	0.720158	0.416888	VIM	1
GO:0055085	transmembrane transport	2016-01-01	346/4535	0.719729	0.725844	0.420179	MMP9	1
GO:0065003	protein-containing complex assembly	2016-01-01	352/4535	0.726095	0.731376	0.423382	CD36	1
GO:0006915	apoptotic process	2016-01-01	409/4535	0.780169	0.784892	0.454361	MMP9	1
GO:0012501	programmed cell death	2016-01-01	419/4535	0.788555	0.792369	0.45869	MMP9	1
GO:0008219	cell death	2016-01-01	441/4535	0.805962	0.808882	0.468249	MMP9	1
GO:0006355	regulation of transcription, DNA-templated	2016-01-01	465/4535	0.823413	0.8254	0.477811	SERPINF2	1
GO:1903506	regulation of nucleic acid-templated transcription	2016-01-01	492/4535	0.841284	0.841284	0.487006	SERPINF2	1
GO:2001141	regulation of RNA biosynthetic process	2016-01-01	492/4535	0.841284	0.841284	0.487006	SERPINF2	1

## Sheet: GO Molecular function
ID	Description	GeneRatio	BgRatio	pvalue	p.adjust	qvalue	geneID	Count
GO:0042802	identical protein binding	2013-07-01	372/3922	6.76691e-05	0.00588721	0.0034903	PAEP/APOA1/SERPINF2/VIM/MMP9/ACTG1/GLYCAM1	7
GO:0005522	profilin binding	2013-01-01	3922-01-01	0.00331464	0.0523513	0.0310371	ACTG1	1
GO:0008745	N-acetylmuramoyl-L-alanine amidase activity	2013-01-01	3922-01-01	0.00331464	0.0523513	0.0310371	PGLYRP1	1
GO:0008035	high-density lipoprotein particle binding	2013-01-01	3922-02-01	0.00661913	0.0523513	0.0310371	APOA1	1
GO:0042834	peptidoglycan binding	2013-01-01	3922-02-01	0.00661913	0.0523513	0.0310371	PGLYRP1	1
GO:0045499	chemorepellent activity	2013-01-01	3922-02-01	0.00661913	0.0523513	0.0310371	APOA1	1
GO:0052593	tryptamine:oxygen oxidoreductase (deaminating) activity	2013-01-01	3922-02-01	0.00661913	0.0523513	0.0310371	SAO	1
GO:0052594	aminoacetone:oxygen oxidoreductase(deaminating) activity	2013-01-01	3922-02-01	0.00661913	0.0523513	0.0310371	SAO	1
GO:0052595	aliphatic-amine oxidase activity	2013-01-01	3922-02-01	0.00661913	0.0523513	0.0310371	SAO	1
GO:0052596	phenethylamine:oxygen oxidoreductase (deaminating) activity	2013-01-01	3922-02-01	0.00661913	0.0523513	0.0310371	SAO	1
GO:1990254	keratin filament binding	2013-01-01	3922-02-01	0.00661913	0.0523513	0.0310371	VIM	1
GO:0008131	primary amine oxidase activity	2013-01-01	3922-03-01	0.0099135	0.0574983	0.0340885	SAO	1
GO:0019215	intermediate filament binding	2013-01-01	3922-03-01	0.0099135	0.0574983	0.0340885	VIM	1
GO:0034190	apolipoprotein receptor binding	2013-01-01	3922-03-01	0.0099135	0.0574983	0.0340885	APOA1	1
GO:0034191	apolipoprotein A-I receptor binding	2013-01-01	3922-03-01	0.0099135	0.0574983	0.0340885	APOA1	1
GO:0015248	sterol transporter activity	2013-01-01	3922-04-01	0.0131978	0.0637893	0.0378182	APOA1	1
GO:0120015	sterol transfer activity	2013-01-01	3922-04-01	0.0131978	0.0637893	0.0378182	APOA1	1
GO:0120020	cholesterol transfer activity	2013-01-01	3922-04-01	0.0131978	0.0637893	0.0378182	APOA1	1
GO:0008289	lipid binding	2013-03-01	178/3922	0.0187761	0.0780478	0.0462715	PAEP/FABP3/PEBP1	3
GO:0005200	structural constituent of cytoskeleton	2013-01-01	3922-06-01	0.0197362	0.0780478	0.0462715	VIM	1
GO:0071813	lipoprotein particle binding	2013-01-01	3922-06-01	0.0197362	0.0780478	0.0462715	APOA1	1
GO:0071814	protein-lipid complex binding	2013-01-01	3922-06-01	0.0197362	0.0780478	0.0462715	APOA1	1
GO:0016641	oxidoreductase activity, acting on the CH-NH2 group of donors, oxygen as acceptor	2013-01-01	3922-07-01	0.0229904	0.0787039	0.0466605	SAO	1
GO:0036041	long-chain fatty acid binding	2013-01-01	3922-07-01	0.0229904	0.0787039	0.0466605	PAEP	1
GO:0097110	scaffold protein binding	2013-01-01	3922-07-01	0.0229904	0.0787039	0.0466605	VIM	1
GO:0016638	oxidoreductase activity, acting on the CH-NH2 group of donors	2013-01-01	3922-08-01	0.0262346	0.0787039	0.0466605	SAO	1
GO:0019841	retinol binding	2013-01-01	3922-08-01	0.0262346	0.0787039	0.0466605	PAEP	1
GO:0048038	quinone binding	2013-01-01	3922-08-01	0.0262346	0.0787039	0.0466605	SAO	1
GO:0120013	lipid transfer activity	2013-01-01	3922-08-01	0.0262346	0.0787039	0.0466605	APOA1	1
GO:0005212	structural constituent of eye lens	2013-01-01	3922-09-01	0.0294689	0.0854598	0.0506658	VIM	1
GO:0001540	amyloid-beta binding	2013-01-01	3922-12-01	0.0391123	0.109767	0.0650765	APOA1	1
GO:0061783	peptidoglycan muralytic activity	2013-01-01	13/3922	0.0423071	0.111422	0.066058	PGLYRP1	1
GO:0003725	double-stranded RNA binding	2013-01-01	14/3922	0.0454921	0.111422	0.066058	VIM	1
GO:0004175	endopeptidase activity	2013-02-01	108/3922	0.048087	0.111422	0.066058	MMP9/CFB	2
GO:0004222	metalloendopeptidase activity	2013-01-01	15/3922	0.0486672	0.111422	0.066058	MMP9	1
GO:0005501	retinoid binding	2013-01-01	15/3922	0.0486672	0.111422	0.066058	PAEP	1
GO:0016811	hydrolase activity, acting on carbon-nitrogen (but not peptide) bonds, in linear amides	2013-01-01	15/3922	0.0486672	0.111422	0.066058	PGLYRP1	1
GO:0019840	isoprenoid binding	2013-01-01	15/3922	0.0486672	0.111422	0.066058	PAEP	1
GO:0005504	fatty acid binding	2013-01-01	16/3922	0.0518327	0.115627	0.0685506	PAEP	1
GO:0004867	serine-type endopeptidase inhibitor activity	2013-01-01	18/3922	0.0581344	0.123358	0.0731344	PEBP1	1
GO:0005319	lipid transporter activity	2013-01-01	18/3922	0.0581344	0.123358	0.0731344	APOA1	1
GO:0043178	alcohol binding	2013-01-01	19/3922	0.0612707	0.126918	0.0752447	PAEP	1
GO:0016810	hydrolase activity, acting on carbon-nitrogen (but not peptide) bonds	2013-01-01	20/3922	0.0643974	0.1289	0.0764199	PGLYRP1	1
GO:0046914	transition metal ion binding	2013-03-01	289/3922	0.0651908	0.1289	0.0764199	MMP9/SAO/PGLYRP1	3
GO:0002020	protease binding	2013-01-01	22/3922	0.070622	0.132517	0.0785644	SERPINF2	1
GO:0048018	receptor ligand activity	2013-02-01	134/3922	0.0706604	0.132517	0.0785644	TTR/APOA1	2
GO:0030546	signaling receptor activator activity	2013-02-01	135/3922	0.0715898	0.132517	0.0785644	TTR/APOA1	2
GO:0030545	receptor regulator activity	2013-02-01	137/3922	0.0734612	0.133148	0.0789386	TTR/APOA1	2
GO:0031072	heat shock protein binding	2013-01-01	24/3922	0.0768083	0.133646	0.0792338	APOA1	1
GO:0033293	monocarboxylic acid binding	2013-01-01	24/3922	0.0768083	0.133646	0.0792338	PAEP	1
GO:0005507	copper ion binding	2013-01-01	25/3922	0.0798872	0.136278	0.080794	SAO	1
GO:0008233	peptidase activity	2013-02-01	164/3922	0.100247	0.166827	0.0989052	MMP9/CFB	2
GO:0019899	enzyme binding	2013-03-01	348/3922	0.10163	0.166827	0.0989052	APOA1/SERPINF2/ACTG1	3
GO:0008237	metallopeptidase activity	2013-01-01	34/3922	0.107174	0.172669	0.102369	MMP9	1
GO:0004866	endopeptidase inhibitor activity	2013-01-01	38/3922	0.11906	0.187405	0.111105	PEBP1	1
GO:0061135	endopeptidase regulator activity	2013-01-01	39/3922	0.122008	0.187405	0.111105	PEBP1	1
GO:0044877	protein-containing complex binding	2013-02-01	185/3922	0.122782	0.187405	0.111105	APOA1/VIM	2
GO:0030414	peptidase inhibitor activity	2013-01-01	40/3922	0.124948	0.187421	0.111115	PEBP1	1
GO:0004252	serine-type endopeptidase activity	2013-01-01	43/3922	0.133712	0.193882	0.114945	CFB	1
GO:0042277	peptide binding	2013-01-01	43/3922	0.133712	0.193882	0.114945	APOA1	1
GO:0008270	zinc ion binding	2013-02-01	204/3922	0.144217	0.197477	0.117077	MMP9/PGLYRP1	2
GO:0008236	serine-type peptidase activity	2013-01-01	47/3922	0.145271	0.197477	0.117077	CFB	1
GO:0031625	ubiquitin protein ligase binding	2013-01-01	47/3922	0.145271	0.197477	0.117077	ACTG1	1
GO:0061134	peptidase regulator activity	2013-01-01	47/3922	0.145271	0.197477	0.117077	PEBP1	1
GO:0017171	serine hydrolase activity	2013-01-01	48/3922	0.148138	0.198277	0.117551	CFB	1
GO:0044389	ubiquitin-like protein ligase binding	2013-01-01	50/3922	0.153847	0.202798	0.120231	ACTG1	1
GO:0031406	carboxylic acid binding	2013-01-01	52/3922	0.15952	0.204091	0.120998	PAEP	1
GO:0043177	organic acid binding	2013-01-01	52/3922	0.15952	0.204091	0.120998	PAEP	1
GO:0005179	hormone activity	2013-01-01	54/3922	0.165158	0.205267	0.121695	TTR	1
GO:0005539	glycosaminoglycan binding	2013-01-01	54/3922	0.165158	0.205267	0.121695	PGLYRP1	1
GO:0033218	amide binding	2013-01-01	63/3922	0.190099	0.232938	0.1381	APOA1	1
GO:0019842	vitamin binding	2013-01-01	64/3922	0.192827	0.232999	0.138136	PAEP	1
GO:0004857	enzyme inhibitor activity	2013-01-01	78/3922	0.230144	0.274281	0.162611	PEBP1	1
GO:0005102	signaling receptor binding	2013-02-01	290/3922	0.249169	0.292942	0.173674	TTR/APOA1	2
GO:0019904	protein domain specific binding	2013-01-01	108/3922	0.304807	0.353576	0.209622	VIM	1
GO:0005524	ATP binding	2013-02-01	385/3922	0.369762	0.42328	0.250946	PEBP1/ACTG1	2
GO:0032559	adenyl ribonucleotide binding	2013-02-01	399/3922	0.387263	0.433336	0.256908	PEBP1/ACTG1	2
GO:0030554	adenyl nucleotide binding	2013-02-01	400/3922	0.388508	0.433336	0.256908	PEBP1/ACTG1	2
GO:0005198	structural molecule activity	2013-01-01	151/3922	0.400223	0.440752	0.261305	VIM	1
GO:0042803	protein homodimerization activity	2013-01-01	172/3922	0.442287	0.480987	0.285159	SERPINF2	1
GO:0140096	catalytic activity, acting on a protein	2013-02-01	457/3922	0.45793	0.49185	0.291599	MMP9/CFB	2
GO:0030234	enzyme regulator activity	2013-01-01	188/3922	0.472489	0.501299	0.297201	PEBP1	1
GO:0035639	purine ribonucleoside triphosphate binding	2013-02-01	499/3922	0.506719	0.531139	0.314892	PEBP1/ACTG1	2
GO:0005215	transporter activity	2013-01-01	241/3922	0.562085	0.582159	0.34514	APOA1	1
GO:0046983	protein dimerization activity	2013-01-01	259/3922	0.589163	0.601885	0.356835	SERPINF2	1
GO:0003723	RNA binding	2013-01-01	263/3922	0.594967	0.601885	0.356835	VIM	1
GO:0016491	oxidoreductase activity	2013-01-01	288/3922	0.629559	0.629559	0.373241	SAO	1

## Sheet: GO Cellular componenet
ID	Description	GeneRatio	BgRatio	pvalue	p.adjust	qvalue	geneID	Count
GO:0005615	extracellular space	2019-05-01	245/4788	0.00216699	0.110902	0.0938083	APOA1/SERPINF2/MMP9/ACTG1/SAO	5
GO:0005581	collagen trimer	2019-02-01	29/4788	0.00568311	0.110902	0.0938083	MGC137014/MGC137211	2
GO:0030139	endocytic vesicle	2019-02-01	33/4788	0.00732137	0.110902	0.0938083	APOA1/VIM	2
GO:0034366	spherical high-density lipoprotein particle	2019-01-01	4788-02-01	0.00792159	0.110902	0.0938083	APOA1	1
GO:0005577	fibrinogen complex	2019-01-01	4788-03-01	0.0118601	0.122532	0.103645	SERPINF2	1
GO:0030014	CCR4-NOT complex	2019-01-01	4788-04-01	0.0157837	0.122532	0.103645	CNOT10	1
GO:0097433	dense body	2019-01-01	4788-04-01	0.0157837	0.122532	0.103645	ACTG1	1
GO:0034361	very-low-density lipoprotein particle	2019-01-01	4788-05-01	0.0196926	0.122532	0.103645	APOA1	1
GO:0034385	triglyceride-rich plasma lipoprotein particle	2019-01-01	4788-05-01	0.0196926	0.122532	0.103645	APOA1	1
GO:0031526	brush border membrane	2019-01-01	4788-07-01	0.0274663	0.153811	0.130103	CD36	1
GO:0034364	high-density lipoprotein particle	2019-01-01	4788-09-01	0.0351815	0.179106	0.151499	APOA1	1
GO:0032994	protein-lipid complex	2019-01-01	13/4788	0.0504385	0.201754	0.170656	APOA1	1
GO:0034358	plasma lipoprotein particle	2019-01-01	13/4788	0.0504385	0.201754	0.170656	APOA1	1
GO:1990777	lipoprotein particle	2019-01-01	13/4788	0.0504385	0.201754	0.170656	APOA1	1
GO:0005903	brush border	2019-01-01	17/4788	0.0654666	0.244409	0.206737	CD36	1
GO:0070062	extracellular exosome	2019-01-01	19/4788	0.0728959	0.246495	0.208502	ACTG1	1
GO:0045335	phagocytic vesicle	2019-01-01	21/4788	0.0802693	0.246495	0.208502	VIM	1
GO:1903561	extracellular vesicle	2019-01-01	21/4788	0.0802693	0.246495	0.208502	ACTG1	1
GO:0016363	nuclear matrix	2019-01-01	24/4788	0.0912252	0.246495	0.208502	VIM	1
GO:0043230	extracellular organelle	2019-01-01	24/4788	0.0912252	0.246495	0.208502	ACTG1	1
GO:0005844	polysome	2019-01-01	25/4788	0.0948496	0.246495	0.208502	VIM	1
GO:0098862	cluster of actin-based cell projections	2019-01-01	26/4788	0.0984603	0.246495	0.208502	CD36	1
GO:0043296	apical junction complex	2019-01-01	27/4788	0.102057	0.246495	0.208502	ACTG1	1
GO:0034399	nuclear periphery	2019-01-01	28/4788	0.105641	0.246495	0.208502	VIM	1
GO:0005925	focal adhesion	2019-01-01	37/4788	0.137288	0.288351	0.243906	ACTG1	1
GO:0030055	cell-substrate junction	2019-01-01	38/4788	0.140738	0.288351	0.243906	ACTG1	1
GO:0005777	peroxisome	2019-01-01	39/4788	0.144175	0.288351	0.243906	VIM	1
GO:0042579	microbody	2019-01-01	39/4788	0.144175	0.288351	0.243906	VIM	1
GO:0005882	intermediate filament	2019-01-01	44/4788	0.161166	0.311217	0.263248	VIM	1
GO:0045111	intermediate filament cytoskeleton	2019-01-01	50/4788	0.181133	0.338115	0.286	VIM	1
GO:0031012	extracellular matrix	2019-01-01	67/4788	0.23529	0.410727	0.34742	MMP9	1
GO:0031253	cell projection membrane	2019-01-01	69/4788	0.241434	0.410727	0.34742	CD36	1
GO:0016324	apical plasma membrane	2019-01-01	70/4788	0.244488	0.410727	0.34742	CD36	1
GO:0045121	membrane raft	2019-01-01	80/4788	0.274396	0.410727	0.34742	CD36	1
GO:0098857	membrane microdomain	2019-01-01	80/4788	0.274396	0.410727	0.34742	CD36	1
GO:0005911	cell-cell junction	2019-01-01	81/4788	0.277324	0.410727	0.34742	ACTG1	1
GO:0031252	cell leading edge	2019-01-01	81/4788	0.277324	0.410727	0.34742	VIM	1
GO:0045177	apical part of cell	2019-01-01	83/4788	0.283147	0.410727	0.34742	CD36	1
GO:0098589	membrane region	2019-01-01	84/4788	0.286042	0.410727	0.34742	CD36	1
GO:0009986	cell surface	2019-01-01	93/4788	0.311602	0.436243	0.369002	SERPINF2	1
GO:0070161	anchoring junction	2019-01-01	112/4788	0.362743	0.495454	0.419087	ACTG1	1
GO:0099513	polymeric cytoskeletal fiber	2019-01-01	152/4788	0.458889	0.611852	0.517544	VIM	1
GO:0120025	plasma membrane bounded cell projection	2019-02-01	436/4788	0.527171	0.675022	0.570978	CD36/VIM	2
GO:0005759	mitochondrial matrix	2019-01-01	191/4788	0.539276	0.675022	0.570978	FABP3	1
GO:0099512	supramolecular fiber	2019-01-01	202/4788	0.559817	0.675022	0.570978	VIM	1
GO:0099081	supramolecular polymer	2019-01-01	204/4788	0.563457	0.675022	0.570978	VIM	1
GO:0042995	cell projection	2019-02-01	472/4788	0.572052	0.675022	0.570978	CD36/VIM	2
GO:1990904	ribonucleoprotein complex	2019-01-01	214/4788	0.581235	0.675022	0.570978	VIM	1
GO:0031410	cytoplasmic vesicle	2019-02-01	499/4788	0.603847	0.675022	0.570978	APOA1/VIM	2
GO:0097708	intracellular vesicle	2019-02-01	499/4788	0.603847	0.675022	0.570978	APOA1/VIM	2
GO:0043005	neuron projection	2019-01-01	234/4788	0.614753	0.675022	0.570978	VIM	1
GO:0098590	plasma membrane region	2019-01-01	264/4788	0.660302	0.711094	0.60149	CD36	1
GO:0099080	supramolecular complex	2019-01-01	291/4788	0.69689	0.736337	0.622841	VIM	1
GO:0005794	Golgi apparatus	2019-01-01	344/4788	0.758134	0.786213	0.66503	CD36	1
GO:0030054	cell junction	2019-01-01	370/4788	0.7837	0.797949	0.674957	ACTG1	1
GO:0098805	whole membrane	2019-01-01	388/4788	0.799875	0.799875	0.676586	CD36	1
