# Supplementary material for: Development of a bioinformatics platform for analysis of quantitative transcriptomics and proteomics data: the OMnalysis
Source: PeerJ. 2021 Nov 9;9:e12415. doi: 10.7717/peerj.12415 (PMC8588854; doi:10.7717/peerj.12415)
Supplement: Supplemental Information 12 [file peerj-09-12415-s012.xlsx]

## Sheet: GO Biological process
ID	Description	setSize	enrichmentScore	NES	pvalue	p.adjust	qvalues	rank	leading_edge	core_enrichment
GO:0098542	defense response to other organism	9	0.693176	1.83857	0.0037085	0.495017	0.490508	14	tags=67%, list=19%, signal=62%	Q8SPP7/P22226/Q2TBU0/P33046/Q0VCG9/Q28085
GO:0009607	response to biotic stimulus	10	0.618834	1.69753	0.0127811	0.495017	0.490508	14	tags=60%, list=19%, signal=56%	Q8SPP7/P22226/Q2TBU0/P33046/Q0VCG9/Q28085
GO:0043207	response to external biotic stimulus	10	0.618834	1.69753	0.0127811	0.495017	0.490508	14	tags=60%, list=19%, signal=56%	Q8SPP7/P22226/Q2TBU0/P33046/Q0VCG9/Q28085
GO:0044419	interspecies interaction between organisms	10	0.618834	1.69753	0.0127811	0.495017	0.490508	14	tags=60%, list=19%, signal=56%	Q8SPP7/P22226/Q2TBU0/P33046/Q0VCG9/Q28085
GO:0051707	response to other organism	10	0.618834	1.69753	0.0127811	0.495017	0.490508	14	tags=60%, list=19%, signal=56%	Q8SPP7/P22226/Q2TBU0/P33046/Q0VCG9/Q28085
GO:0006952	defense response	12	0.592339	1.69853	0.0146031	0.495017	0.490508	14	tags=50%, list=19%, signal=48%	Q8SPP7/P22226/Q2TBU0/P33046/Q0VCG9/Q28085
GO:0006950	response to stress	17	0.523888	1.65017	0.0182057	0.495017	0.490508	14	tags=41%, list=19%, signal=43%	Q8SPP7/P22226/Q2TBU0/P52176/P33046/Q0VCG9/Q28085
GO:0009605	response to external stimulus	13	0.553686	1.62142	0.0199542	0.495017	0.490508	14	tags=46%, list=19%, signal=45%	Q8SPP7/P22226/Q2TBU0/P33046/Q0VCG9/Q28085
GO:0044093	positive regulation of molecular function	2	0.902778	1.45711	0.0225312	0.495017	0.490508	9	tags=100%, list=12%, signal=90%	Q9TU03/P52176
GO:0002683	negative regulation of immune system process	2	0.899801	1.4523	0.0251062	0.495017	0.490508	1	tags=50%, list=1%, signal=51%	Q8SPP7
GO:0002697	regulation of immune effector process	2	0.899801	1.4523	0.0251062	0.495017	0.490508	1	tags=50%, list=1%, signal=51%	Q8SPP7
GO:0002698	negative regulation of immune effector process	2	0.899801	1.4523	0.0251062	0.495017	0.490508	1	tags=50%, list=1%, signal=51%	Q8SPP7
GO:0050777	negative regulation of immune response	2	0.899801	1.4523	0.0251062	0.495017	0.490508	1	tags=50%, list=1%, signal=51%	Q8SPP7
GO:0001906	cell killing	2	0.888889	1.43469	0.0287238	0.495017	0.490508	10	tags=100%, list=14%, signal=89%	Q8SPP7/P33046
GO:0009620	response to fungus	2	0.888889	1.43469	0.0287238	0.495017	0.490508	10	tags=100%, list=14%, signal=89%	Q8SPP7/P33046
GO:0031640	killing of cells of other organism	2	0.888889	1.43469	0.0287238	0.495017	0.490508	10	tags=100%, list=14%, signal=89%	Q8SPP7/P33046
GO:0050832	defense response to fungus	2	0.888889	1.43469	0.0287238	0.495017	0.490508	10	tags=100%, list=14%, signal=89%	Q8SPP7/P33046
GO:0000270	peptidoglycan metabolic process	1	1	1.32547	0.0290346	0.495017	0.490508	1	tags=100%, list=1%, signal=100%	Q8SPP7
GO:0001779	natural killer cell differentiation	1	1	1.32547	0.0290346	0.495017	0.490508	1	tags=100%, list=1%, signal=100%	Q8SPP7
GO:0001818	negative regulation of cytokine production	1	1	1.32547	0.0290346	0.495017	0.490508	1	tags=100%, list=1%, signal=100%	Q8SPP7
GO:0002285	lymphocyte activation involved in immune response	1	1	1.32547	0.0290346	0.495017	0.490508	1	tags=100%, list=1%, signal=100%	Q8SPP7
GO:0002323	natural killer cell activation involved in immune response	1	1	1.32547	0.0290346	0.495017	0.490508	1	tags=100%, list=1%, signal=100%	Q8SPP7
GO:0002325	natural killer cell differentiation involved in immune response	1	1	1.32547	0.0290346	0.495017	0.490508	1	tags=100%, list=1%, signal=100%	Q8SPP7
GO:0002520	immune system development	1	1	1.32547	0.0290346	0.495017	0.490508	1	tags=100%, list=1%, signal=100%	Q8SPP7
GO:0002521	leukocyte differentiation	1	1	1.32547	0.0290346	0.495017	0.490508	1	tags=100%, list=1%, signal=100%	Q8SPP7
GO:0002694	regulation of leukocyte activation	1	1	1.32547	0.0290346	0.495017	0.490508	1	tags=100%, list=1%, signal=100%	Q8SPP7
GO:0002695	negative regulation of leukocyte activation	1	1	1.32547	0.0290346	0.495017	0.490508	1	tags=100%, list=1%, signal=100%	Q8SPP7
GO:0006026	aminoglycan catabolic process	1	1	1.32547	0.0290346	0.495017	0.490508	1	tags=100%, list=1%, signal=100%	Q8SPP7
GO:0006027	glycosaminoglycan catabolic process	1	1	1.32547	0.0290346	0.495017	0.490508	1	tags=100%, list=1%, signal=100%	Q8SPP7
GO:0009253	peptidoglycan catabolic process	1	1	1.32547	0.0290346	0.495017	0.490508	1	tags=100%, list=1%, signal=100%	Q8SPP7
GO:0019730	antimicrobial humoral response	1	1	1.32547	0.0290346	0.495017	0.490508	1	tags=100%, list=1%, signal=100%	Q8SPP7
GO:0030097	hemopoiesis	1	1	1.32547	0.0290346	0.495017	0.490508	1	tags=100%, list=1%, signal=100%	Q8SPP7
GO:0030098	lymphocyte differentiation	1	1	1.32547	0.0290346	0.495017	0.490508	1	tags=100%, list=1%, signal=100%	Q8SPP7
GO:0030101	natural killer cell activation	1	1	1.32547	0.0290346	0.495017	0.490508	1	tags=100%, list=1%, signal=100%	Q8SPP7
GO:0032609	interferon-gamma production	1	1	1.32547	0.0290346	0.495017	0.490508	1	tags=100%, list=1%, signal=100%	Q8SPP7
GO:0032649	regulation of interferon-gamma production	1	1	1.32547	0.0290346	0.495017	0.490508	1	tags=100%, list=1%, signal=100%	Q8SPP7
GO:0032689	negative regulation of interferon-gamma production	1	1	1.32547	0.0290346	0.495017	0.490508	1	tags=100%, list=1%, signal=100%	Q8SPP7
GO:0032814	regulation of natural killer cell activation	1	1	1.32547	0.0290346	0.495017	0.490508	1	tags=100%, list=1%, signal=100%	Q8SPP7
GO:0032815	negative regulation of natural killer cell activation	1	1	1.32547	0.0290346	0.495017	0.490508	1	tags=100%, list=1%, signal=100%	Q8SPP7
GO:0032823	regulation of natural killer cell differentiation	1	1	1.32547	0.0290346	0.495017	0.490508	1	tags=100%, list=1%, signal=100%	Q8SPP7
GO:0032824	negative regulation of natural killer cell differentiation	1	1	1.32547	0.0290346	0.495017	0.490508	1	tags=100%, list=1%, signal=100%	Q8SPP7
GO:0032826	regulation of natural killer cell differentiation involved in immune response	1	1	1.32547	0.0290346	0.495017	0.490508	1	tags=100%, list=1%, signal=100%	Q8SPP7
GO:0032827	negative regulation of natural killer cell differentiation involved in immune response	1	1	1.32547	0.0290346	0.495017	0.490508	1	tags=100%, list=1%, signal=100%	Q8SPP7
GO:0040007	growth	1	1	1.32547	0.0290346	0.495017	0.490508	1	tags=100%, list=1%, signal=100%	Q8SPP7
GO:0044110	growth involved in symbiotic interaction	1	1	1.32547	0.0290346	0.495017	0.490508	1	tags=100%, list=1%, signal=100%	Q8SPP7
GO:0044117	growth of symbiont in host	1	1	1.32547	0.0290346	0.495017	0.490508	1	tags=100%, list=1%, signal=100%	Q8SPP7
GO:0044403	symbiotic process	1	1	1.32547	0.0290346	0.495017	0.490508	1	tags=100%, list=1%, signal=100%	Q8SPP7
GO:0045619	regulation of lymphocyte differentiation	1	1	1.32547	0.0290346	0.495017	0.490508	1	tags=100%, list=1%, signal=100%	Q8SPP7
GO:0045620	negative regulation of lymphocyte differentiation	1	1	1.32547	0.0290346	0.495017	0.490508	1	tags=100%, list=1%, signal=100%	Q8SPP7
GO:0046649	lymphocyte activation	1	1	1.32547	0.0290346	0.495017	0.490508	1	tags=100%, list=1%, signal=100%	Q8SPP7
GO:0048534	hematopoietic or lymphoid organ development	1	1	1.32547	0.0290346	0.495017	0.490508	1	tags=100%, list=1%, signal=100%	Q8SPP7
GO:0050865	regulation of cell activation	1	1	1.32547	0.0290346	0.495017	0.490508	1	tags=100%, list=1%, signal=100%	Q8SPP7
GO:0050866	negative regulation of cell activation	1	1	1.32547	0.0290346	0.495017	0.490508	1	tags=100%, list=1%, signal=100%	Q8SPP7
GO:0051249	regulation of lymphocyte activation	1	1	1.32547	0.0290346	0.495017	0.490508	1	tags=100%, list=1%, signal=100%	Q8SPP7
GO:0051250	negative regulation of lymphocyte activation	1	1	1.32547	0.0290346	0.495017	0.490508	1	tags=100%, list=1%, signal=100%	Q8SPP7
GO:0061844	antimicrobial humoral immune response mediated by antimicrobial peptide	1	1	1.32547	0.0290346	0.495017	0.490508	1	tags=100%, list=1%, signal=100%	Q8SPP7
GO:1901136	carbohydrate derivative catabolic process	1	1	1.32547	0.0290346	0.495017	0.490508	1	tags=100%, list=1%, signal=100%	Q8SPP7
GO:1902105	regulation of leukocyte differentiation	1	1	1.32547	0.0290346	0.495017	0.490508	1	tags=100%, list=1%, signal=100%	Q8SPP7
GO:1902106	negative regulation of leukocyte differentiation	1	1	1.32547	0.0290346	0.495017	0.490508	1	tags=100%, list=1%, signal=100%	Q8SPP7
GO:1903706	regulation of hemopoiesis	1	1	1.32547	0.0290346	0.495017	0.490508	1	tags=100%, list=1%, signal=100%	Q8SPP7
GO:1903707	negative regulation of hemopoiesis	1	1	1.32547	0.0290346	0.495017	0.490508	1	tags=100%, list=1%, signal=100%	Q8SPP7
GO:0008150	biological_process	32	0.424176	1.49257	0.0533175	0.894359	0.886212	16	tags=34%, list=22%, signal=47%	Q8SPP7/P22226/Q2TBU0/Q9TU03/P52176/P33046/Q0VCG9/Q58CQ9/Q28085/Q3SZV7/Q29437
GO:0050896	response to stimulus	23	0.445087	1.49954	0.0558252	0.910949	0.902651	14	tags=35%, list=19%, signal=41%	Q8SPP7/P22226/Q2TBU0/Q9TU03/P52176/P33046/Q0VCG9/Q28085
GO:0022607	cellular component assembly	6	-0.558824	-1.55682	0.0583365	0.910949	0.902651	37	tags=100%, list=50%, signal=54%	P15497/P28800/Q3SX14/Q03247/P26201
GO:0044085	cellular component biogenesis	6	-0.558824	-1.55682	0.0583365	0.910949	0.902651	37	tags=100%, list=50%, signal=54%	P15497/P28800/Q3SX14/Q03247/P26201
GO:0042742	defense response to bacterium	3	0.763803	1.40353	0.0757825	0.910949	0.902651	5	tags=67%, list=7%, signal=65%	P22226/Q2TBU0
GO:0048585	negative regulation of response to stimulus	5	0.655219	1.41873	0.0761035	0.910949	0.902651	9	tags=40%, list=12%, signal=38%	Q8SPP7/P52176
GO:0019835	cytolysis	1	0.958904	1.271	0.0783939	0.910949	0.902651	4	tags=100%, list=5%, signal=96%	P22226
GO:0050830	defense response to Gram-positive bacterium	1	0.958904	1.271	0.0783939	0.910949	0.902651	4	tags=100%, list=5%, signal=96%	P22226
GO:0044087	regulation of cellular component biogenesis	5	-0.550725	-1.42585	0.0809249	0.910949	0.902651	37	tags=100%, list=50%, signal=54%	P15497/P28800/Q3SX14/P26201
GO:1902903	regulation of supramolecular fiber organization	5	-0.550725	-1.42585	0.0809249	0.910949	0.902651	37	tags=100%, list=50%, signal=54%	P15497/P28800/Q3SX14/Q03247
GO:0002682	regulation of immune system process	4	0.692298	1.39862	0.08125	0.910949	0.902651	14	tags=50%, list=19%, signal=43%	Q8SPP7/Q28085
GO:0006959	humoral immune response	4	0.692298	1.39862	0.08125	0.910949	0.902651	14	tags=50%, list=19%, signal=43%	Q8SPP7/Q28085
GO:0050776	regulation of immune response	4	0.692298	1.39862	0.08125	0.910949	0.902651	14	tags=50%, list=19%, signal=43%	Q8SPP7/Q28085
GO:0031347	regulation of defense response	2	0.815014	1.31545	0.110155	0.910949	0.902651	1	tags=50%, list=1%, signal=51%	Q8SPP7
GO:0031348	negative regulation of defense response	2	0.815014	1.31545	0.110155	0.910949	0.902651	1	tags=50%, list=1%, signal=51%	Q8SPP7
GO:0050727	regulation of inflammatory response	2	0.815014	1.31545	0.110155	0.910949	0.902651	1	tags=50%, list=1%, signal=51%	Q8SPP7
GO:0050728	negative regulation of inflammatory response	2	0.815014	1.31545	0.110155	0.910949	0.902651	1	tags=50%, list=1%, signal=51%	Q8SPP7
GO:1901565	organonitrogen compound catabolic process	2	0.81538	1.31604	0.110155	0.910949	0.902651	1	tags=50%, list=1%, signal=51%	Q8SPP7
GO:0009636	response to toxic substance	1	0.945205	1.25284	0.114723	0.910949	0.902651	5	tags=100%, list=7%, signal=95%	Q2TBU0
GO:0097237	cellular response to toxic substance	1	0.945205	1.25284	0.114723	0.910949	0.902651	5	tags=100%, list=7%, signal=95%	Q2TBU0
GO:0098754	detoxification	1	0.945205	1.25284	0.114723	0.910949	0.902651	5	tags=100%, list=7%, signal=95%	Q2TBU0
GO:0098869	cellular oxidant detoxification	1	0.945205	1.25284	0.114723	0.910949	0.902651	5	tags=100%, list=7%, signal=95%	Q2TBU0
GO:1990748	cellular detoxification	1	0.945205	1.25284	0.114723	0.910949	0.902651	5	tags=100%, list=7%, signal=95%	Q2TBU0
GO:0006874	cellular calcium ion homeostasis	1	-0.945205	-1.26426	0.121086	0.910949	0.902651	6	tags=100%, list=8%, signal=93%
GO:0007204	positive regulation of cytosolic calcium ion concentration	1	-0.945205	-1.26426	0.121086	0.910949	0.902651	6	tags=100%, list=8%, signal=93%
GO:0007586	digestion	1	-0.945205	-1.26426	0.121086	0.910949	0.902651	6	tags=100%, list=8%, signal=93%
GO:0007600	sensory perception	1	-0.945205	-1.26426	0.121086	0.910949	0.902651	6	tags=100%, list=8%, signal=93%
GO:0007606	sensory perception of chemical stimulus	1	-0.945205	-1.26426	0.121086	0.910949	0.902651	6	tags=100%, list=8%, signal=93%
GO:0015718	monocarboxylic acid transport	1	-0.945205	-1.26426	0.121086	0.910949	0.902651	6	tags=100%, list=8%, signal=93%
GO:0015849	organic acid transport	1	-0.945205	-1.26426	0.121086	0.910949	0.902651	6	tags=100%, list=8%, signal=93%
GO:0015908	fatty acid transport	1	-0.945205	-1.26426	0.121086	0.910949	0.902651	6	tags=100%, list=8%, signal=93%
GO:0015909	long-chain fatty acid transport	1	-0.945205	-1.26426	0.121086	0.910949	0.902651	6	tags=100%, list=8%, signal=93%
GO:0022600	digestive system process	1	-0.945205	-1.26426	0.121086	0.910949	0.902651	6	tags=100%, list=8%, signal=93%
GO:0030299	intestinal cholesterol absorption	1	-0.945205	-1.26426	0.121086	0.910949	0.902651	6	tags=100%, list=8%, signal=93%
GO:0031623	receptor internalization	1	-0.945205	-1.26426	0.121086	0.910949	0.902651	6	tags=100%, list=8%, signal=93%
GO:0032493	response to bacterial lipoprotein	1	-0.945205	-1.26426	0.121086	0.910949	0.902651	6	tags=100%, list=8%, signal=93%
GO:0032611	interleukin-1 beta production	1	-0.945205	-1.26426	0.121086	0.910949	0.902651	6	tags=100%, list=8%, signal=93%
GO:0032612	interleukin-1 production	1	-0.945205	-1.26426	0.121086	0.910949	0.902651	6	tags=100%, list=8%, signal=93%
GO:0034196	acylglycerol transport	1	-0.945205	-1.26426	0.121086	0.910949	0.902651	6	tags=100%, list=8%, signal=93%
GO:0034197	triglyceride transport	1	-0.945205	-1.26426	0.121086	0.910949	0.902651	6	tags=100%, list=8%, signal=93%
GO:0043112	receptor metabolic process	1	-0.945205	-1.26426	0.121086	0.910949	0.902651	6	tags=100%, list=8%, signal=93%
GO:0044241	lipid digestion	1	-0.945205	-1.26426	0.121086	0.910949	0.902651	6	tags=100%, list=8%, signal=93%
GO:0044539	long-chain fatty acid import into cell	1	-0.945205	-1.26426	0.121086	0.910949	0.902651	6	tags=100%, list=8%, signal=93%
GO:0044546	NLRP3 inflammasome complex assembly	1	-0.945205	-1.26426	0.121086	0.910949	0.902651	6	tags=100%, list=8%, signal=93%
GO:0046942	carboxylic acid transport	1	-0.945205	-1.26426	0.121086	0.910949	0.902651	6	tags=100%, list=8%, signal=93%
GO:0048871	multicellular organismal homeostasis	1	-0.945205	-1.26426	0.121086	0.910949	0.902651	6	tags=100%, list=8%, signal=93%
GO:0050877	nervous system process	1	-0.945205	-1.26426	0.121086	0.910949	0.902651	6	tags=100%, list=8%, signal=93%
GO:0050892	intestinal absorption	1	-0.945205	-1.26426	0.121086	0.910949	0.902651	6	tags=100%, list=8%, signal=93%
GO:0050909	sensory perception of taste	1	-0.945205	-1.26426	0.121086	0.910949	0.902651	6	tags=100%, list=8%, signal=93%
GO:0051480	regulation of cytosolic calcium ion concentration	1	-0.945205	-1.26426	0.121086	0.910949	0.902651	6	tags=100%, list=8%, signal=93%
GO:0055074	calcium ion homeostasis	1	-0.945205	-1.26426	0.121086	0.910949	0.902651	6	tags=100%, list=8%, signal=93%
GO:0055094	response to lipoprotein particle	1	-0.945205	-1.26426	0.121086	0.910949	0.902651	6	tags=100%, list=8%, signal=93%
GO:0070339	response to bacterial lipopeptide	1	-0.945205	-1.26426	0.121086	0.910949	0.902651	6	tags=100%, list=8%, signal=93%
GO:0070542	response to fatty acid	1	-0.945205	-1.26426	0.121086	0.910949	0.902651	6	tags=100%, list=8%, signal=93%
GO:0070543	response to linoleic acid	1	-0.945205	-1.26426	0.121086	0.910949	0.902651	6	tags=100%, list=8%, signal=93%
GO:0071220	cellular response to bacterial lipoprotein	1	-0.945205	-1.26426	0.121086	0.910949	0.902651	6	tags=100%, list=8%, signal=93%
GO:0071221	cellular response to bacterial lipopeptide	1	-0.945205	-1.26426	0.121086	0.910949	0.902651	6	tags=100%, list=8%, signal=93%
GO:0071402	cellular response to lipoprotein particle stimulus	1	-0.945205	-1.26426	0.121086	0.910949	0.902651	6	tags=100%, list=8%, signal=93%
GO:0071404	cellular response to low-density lipoprotein particle stimulus	1	-0.945205	-1.26426	0.121086	0.910949	0.902651	6	tags=100%, list=8%, signal=93%
GO:0071724	response to diacyl bacterial lipopeptide	1	-0.945205	-1.26426	0.121086	0.910949	0.902651	6	tags=100%, list=8%, signal=93%
GO:0071726	cellular response to diacyl bacterial lipopeptide	1	-0.945205	-1.26426	0.121086	0.910949	0.902651	6	tags=100%, list=8%, signal=93%
GO:0072503	cellular divalent inorganic cation homeostasis	1	-0.945205	-1.26426	0.121086	0.910949	0.902651	6	tags=100%, list=8%, signal=93%
GO:0072507	divalent inorganic cation homeostasis	1	-0.945205	-1.26426	0.121086	0.910949	0.902651	6	tags=100%, list=8%, signal=93%
GO:0097009	energy homeostasis	1	-0.945205	-1.26426	0.121086	0.910949	0.902651	6	tags=100%, list=8%, signal=93%
GO:0098657	import into cell	1	-0.945205	-1.26426	0.121086	0.910949	0.902651	6	tags=100%, list=8%, signal=93%
GO:0098856	intestinal lipid absorption	1	-0.945205	-1.26426	0.121086	0.910949	0.902651	6	tags=100%, list=8%, signal=93%
GO:0140354	lipid import into cell	1	-0.945205	-1.26426	0.121086	0.910949	0.902651	6	tags=100%, list=8%, signal=93%
GO:1900225	regulation of NLRP3 inflammasome complex assembly	1	-0.945205	-1.26426	0.121086	0.910949	0.902651	6	tags=100%, list=8%, signal=93%
GO:1900227	positive regulation of NLRP3 inflammasome complex assembly	1	-0.945205	-1.26426	0.121086	0.910949	0.902651	6	tags=100%, list=8%, signal=93%
GO:0006954	inflammatory response	6	0.571603	1.32289	0.131387	0.910949	0.902651	5	tags=33%, list=7%, signal=34%	Q8SPP7/Q2TBU0
GO:0032101	regulation of response to external stimulus	4	0.651256	1.31571	0.146875	0.910949	0.902651	1	tags=25%, list=1%, signal=26%	Q8SPP7
GO:0032102	negative regulation of response to external stimulus	4	0.651256	1.31571	0.146875	0.910949	0.902651	1	tags=25%, list=1%, signal=26%	Q8SPP7
GO:0065003	protein-containing complex assembly	3	-0.676056	-1.36665	0.150754	0.910949	0.902651	27	tags=100%, list=36%, signal=66%	Q03247/P26201
GO:0002376	immune system process	9	0.492165	1.30541	0.153226	0.910949	0.902651	14	tags=44%, list=19%, signal=41%	Q8SPP7/Q2TBU0/Q0VCG9/Q28085
GO:0044089	positive regulation of cellular component biogenesis	4	-0.571429	-1.34907	0.164384	0.910949	0.902651	35	tags=100%, list=47%, signal=56%	P28800/Q3SX14/P26201
GO:0006812	cation transport	3	0.692872	1.27319	0.174629	0.910949	0.902651	15	tags=67%, list=20%, signal=55%	P52176/Q3SZV7
GO:0031532	actin cytoskeleton reorganization	1	0.90411	1.19837	0.17782	0.910949	0.902651	8	tags=100%, list=11%, signal=90%	Q9TU03
GO:0043085	positive regulation of catalytic activity	1	0.90411	1.19837	0.17782	0.910949	0.902651	8	tags=100%, list=11%, signal=90%	Q9TU03
GO:0043087	regulation of GTPase activity	1	0.90411	1.19837	0.17782	0.910949	0.902651	8	tags=100%, list=11%, signal=90%	Q9TU03
GO:0043547	positive regulation of GTPase activity	1	0.90411	1.19837	0.17782	0.910949	0.902651	8	tags=100%, list=11%, signal=90%	Q9TU03
GO:0051345	positive regulation of hydrolase activity	1	0.90411	1.19837	0.17782	0.910949	0.902651	8	tags=100%, list=11%, signal=90%	Q9TU03
GO:2000249	regulation of actin cytoskeleton reorganization	1	0.90411	1.19837	0.17782	0.910949	0.902651	8	tags=100%, list=11%, signal=90%	Q9TU03
GO:0006022	aminoglycan metabolic process	2	0.757074	1.22194	0.185886	0.910949	0.902651	1	tags=50%, list=1%, signal=51%	Q8SPP7
GO:0030203	glycosaminoglycan metabolic process	2	0.757074	1.22194	0.185886	0.910949	0.902651	1	tags=50%, list=1%, signal=51%	Q8SPP7
GO:1901135	carbohydrate derivative metabolic process	2	0.757074	1.22194	0.185886	0.910949	0.902651	1	tags=50%, list=1%, signal=51%	Q8SPP7
GO:0007015	actin filament organization	4	-0.542857	-1.28161	0.194521	0.910949	0.902651	37	tags=100%, list=50%, signal=53%	P15497/P28800/Q3SX14
GO:0110053	regulation of actin filament organization	4	-0.542857	-1.28161	0.194521	0.910949	0.902651	37	tags=100%, list=50%, signal=53%	P15497/P28800/Q3SX14
GO:0045596	negative regulation of cell differentiation	3	0.674877	1.24012	0.197694	0.910949	0.902651	9	tags=67%, list=12%, signal=61%	Q8SPP7/P52176
GO:0051093	negative regulation of developmental process	3	0.674877	1.24012	0.197694	0.910949	0.902651	9	tags=67%, list=12%, signal=61%	Q8SPP7/P52176
GO:0045087	innate immune response	6	0.530414	1.22756	0.20438	0.910949	0.902651	34	tags=83%, list=46%, signal=49%	Q8SPP7/Q0VCG9/Q28085/P48616/Q2TBI0
GO:0097435	supramolecular fiber organization	7	-0.41791	-1.23008	0.211604	0.910949	0.902651	47	tags=100%, list=64%, signal=40%	P63258/P15497/P28800/Q3SX14/Q03247/P26201
GO:0031334	positive regulation of protein-containing complex assembly	2	-0.743158	-1.26286	0.21831	0.910949	0.902651	6	tags=100%, list=8%, signal=94%	P26201
GO:0034622	cellular protein-containing complex assembly	2	-0.743158	-1.26286	0.21831	0.910949	0.902651	6	tags=100%, list=8%, signal=94%	P26201
GO:0043254	regulation of protein-containing complex assembly	2	-0.743158	-1.26286	0.21831	0.910949	0.902651	6	tags=100%, list=8%, signal=94%	P26201
GO:1990000	amyloid fibril formation	2	-0.740351	-1.25809	0.21831	0.910949	0.902651	6	tags=100%, list=8%, signal=94%	P26201
GO:0048583	regulation of response to stimulus	11	0.434482	1.21104	0.231076	0.910949	0.902651	14	tags=36%, list=19%, signal=35%	Q8SPP7/Q9TU03/P52176/Q28085
GO:0000003	reproduction	1	0.890411	1.18021	0.231358	0.910949	0.902651	9	tags=100%, list=12%, signal=89%	P52176
GO:0000302	response to reactive oxygen species	1	0.890411	1.18021	0.231358	0.910949	0.902651	9	tags=100%, list=12%, signal=89%	P52176
GO:0001501	skeletal system development	1	0.890411	1.18021	0.231358	0.910949	0.902651	9	tags=100%, list=12%, signal=89%	P52176
GO:0001655	urogenital system development	1	0.890411	1.18021	0.231358	0.910949	0.902651	9	tags=100%, list=12%, signal=89%	P52176
GO:0001704	formation of primary germ layer	1	0.890411	1.18021	0.231358	0.910949	0.902651	9	tags=100%, list=12%, signal=89%	P52176
GO:0001706	endoderm formation	1	0.890411	1.18021	0.231358	0.910949	0.902651	9	tags=100%, list=12%, signal=89%	P52176
GO:0001822	kidney development	1	0.890411	1.18021	0.231358	0.910949	0.902651	9	tags=100%, list=12%, signal=89%	P52176
GO:0001836	release of cytochrome c from mitochondria	1	0.890411	1.18021	0.231358	0.910949	0.902651	9	tags=100%, list=12%, signal=89%	P52176
GO:0006915	apoptotic process	1	0.890411	1.18021	0.231358	0.910949	0.902651	9	tags=100%, list=12%, signal=89%	P52176
GO:0007005	mitochondrion organization	1	0.890411	1.18021	0.231358	0.910949	0.902651	9	tags=100%, list=12%, signal=89%	P52176
GO:0007169	transmembrane receptor protein tyrosine kinase signaling pathway	1	0.890411	1.18021	0.231358	0.910949	0.902651	9	tags=100%, list=12%, signal=89%	P52176
GO:0007173	epidermal growth factor receptor signaling pathway	1	0.890411	1.18021	0.231358	0.910949	0.902651	9	tags=100%, list=12%, signal=89%	P52176
GO:0007492	endoderm development	1	0.890411	1.18021	0.231358	0.910949	0.902651	9	tags=100%, list=12%, signal=89%	P52176
GO:0007565	female pregnancy	1	0.890411	1.18021	0.231358	0.910949	0.902651	9	tags=100%, list=12%, signal=89%	P52176
GO:0007566	embryo implantation	1	0.890411	1.18021	0.231358	0.910949	0.902651	9	tags=100%, list=12%, signal=89%	P52176
GO:0008219	cell death	1	0.890411	1.18021	0.231358	0.910949	0.902651	9	tags=100%, list=12%, signal=89%	P52176
GO:0008637	apoptotic mitochondrial changes	1	0.890411	1.18021	0.231358	0.910949	0.902651	9	tags=100%, list=12%, signal=89%	P52176
GO:0010035	response to inorganic substance	1	0.890411	1.18021	0.231358	0.910949	0.902651	9	tags=100%, list=12%, signal=89%	P52176
GO:0010038	response to metal ion	1	0.890411	1.18021	0.231358	0.910949	0.902651	9	tags=100%, list=12%, signal=89%	P52176
GO:0010632	regulation of epithelial cell migration	1	0.890411	1.18021	0.231358	0.910949	0.902651	9	tags=100%, list=12%, signal=89%	P52176
GO:0010634	positive regulation of epithelial cell migration	1	0.890411	1.18021	0.231358	0.910949	0.902651	9	tags=100%, list=12%, signal=89%	P52176
GO:0010821	regulation of mitochondrion organization	1	0.890411	1.18021	0.231358	0.910949	0.902651	9	tags=100%, list=12%, signal=89%	P52176
GO:0010822	positive regulation of mitochondrion organization	1	0.890411	1.18021	0.231358	0.910949	0.902651	9	tags=100%, list=12%, signal=89%	P52176
GO:0010941	regulation of cell death	1	0.890411	1.18021	0.231358	0.910949	0.902651	9	tags=100%, list=12%, signal=89%	P52176
GO:0010942	positive regulation of cell death	1	0.890411	1.18021	0.231358	0.910949	0.902651	9	tags=100%, list=12%, signal=89%	P52176
GO:0012501	programmed cell death	1	0.890411	1.18021	0.231358	0.910949	0.902651	9	tags=100%, list=12%, signal=89%	P52176
GO:0022414	reproductive process	1	0.890411	1.18021	0.231358	0.910949	0.902651	9	tags=100%, list=12%, signal=89%	P52176
GO:0022898	regulation of transmembrane transporter activity	1	0.890411	1.18021	0.231358	0.910949	0.902651	9	tags=100%, list=12%, signal=89%	P52176
GO:0030856	regulation of epithelial cell differentiation	1	0.890411	1.18021	0.231358	0.910949	0.902651	9	tags=100%, list=12%, signal=89%	P52176
GO:0030857	negative regulation of epithelial cell differentiation	1	0.890411	1.18021	0.231358	0.910949	0.902651	9	tags=100%, list=12%, signal=89%	P52176
GO:0032092	positive regulation of protein binding	1	0.890411	1.18021	0.231358	0.910949	0.902651	9	tags=100%, list=12%, signal=89%	P52176
GO:0032409	regulation of transporter activity	1	0.890411	1.18021	0.231358	0.910949	0.902651	9	tags=100%, list=12%, signal=89%	P52176
GO:0032410	negative regulation of transporter activity	1	0.890411	1.18021	0.231358	0.910949	0.902651	9	tags=100%, list=12%, signal=89%	P52176
GO:0032412	regulation of ion transmembrane transporter activity	1	0.890411	1.18021	0.231358	0.910949	0.902651	9	tags=100%, list=12%, signal=89%	P52176
GO:0032413	negative regulation of ion transmembrane transporter activity	1	0.890411	1.18021	0.231358	0.910949	0.902651	9	tags=100%, list=12%, signal=89%	P52176
GO:0034220	ion transmembrane transport	1	0.890411	1.18021	0.231358	0.910949	0.902651	9	tags=100%, list=12%, signal=89%	P52176
GO:0034599	cellular response to oxidative stress	1	0.890411	1.18021	0.231358	0.910949	0.902651	9	tags=100%, list=12%, signal=89%	P52176
GO:0034614	cellular response to reactive oxygen species	1	0.890411	1.18021	0.231358	0.910949	0.902651	9	tags=100%, list=12%, signal=89%	P52176
GO:0034762	regulation of transmembrane transport	1	0.890411	1.18021	0.231358	0.910949	0.902651	9	tags=100%, list=12%, signal=89%	P52176
GO:0034763	negative regulation of transmembrane transport	1	0.890411	1.18021	0.231358	0.910949	0.902651	9	tags=100%, list=12%, signal=89%	P52176
GO:0034765	regulation of ion transmembrane transport	1	0.890411	1.18021	0.231358	0.910949	0.902651	9	tags=100%, list=12%, signal=89%	P52176
GO:0034766	negative regulation of ion transmembrane transport	1	0.890411	1.18021	0.231358	0.910949	0.902651	9	tags=100%, list=12%, signal=89%	P52176
GO:0035850	epithelial cell differentiation involved in kidney development	1	0.890411	1.18021	0.231358	0.910949	0.902651	9	tags=100%, list=12%, signal=89%	P52176
GO:0035987	endodermal cell differentiation	1	0.890411	1.18021	0.231358	0.910949	0.902651	9	tags=100%, list=12%, signal=89%	P52176
GO:0038127	ERBB signaling pathway	1	0.890411	1.18021	0.231358	0.910949	0.902651	9	tags=100%, list=12%, signal=89%	P52176
GO:0042058	regulation of epidermal growth factor receptor signaling pathway	1	0.890411	1.18021	0.231358	0.910949	0.902651	9	tags=100%, list=12%, signal=89%	P52176
GO:0042981	regulation of apoptotic process	1	0.890411	1.18021	0.231358	0.910949	0.902651	9	tags=100%, list=12%, signal=89%	P52176
GO:0043065	positive regulation of apoptotic process	1	0.890411	1.18021	0.231358	0.910949	0.902651	9	tags=100%, list=12%, signal=89%	P52176
GO:0043066	negative regulation of apoptotic process	1	0.890411	1.18021	0.231358	0.910949	0.902651	9	tags=100%, list=12%, signal=89%	P52176
GO:0043067	regulation of programmed cell death	1	0.890411	1.18021	0.231358	0.910949	0.902651	9	tags=100%, list=12%, signal=89%	P52176
GO:0043068	positive regulation of programmed cell death	1	0.890411	1.18021	0.231358	0.910949	0.902651	9	tags=100%, list=12%, signal=89%	P52176
GO:0043069	negative regulation of programmed cell death	1	0.890411	1.18021	0.231358	0.910949	0.902651	9	tags=100%, list=12%, signal=89%	P52176
GO:0043154	negative regulation of cysteine-type endopeptidase activity involved in apoptotic process	1	0.890411	1.18021	0.231358	0.910949	0.902651	9	tags=100%, list=12%, signal=89%	P52176
GO:0043271	negative regulation of ion transport	1	0.890411	1.18021	0.231358	0.910949	0.902651	9	tags=100%, list=12%, signal=89%	P52176
GO:0043281	regulation of cysteine-type endopeptidase activity involved in apoptotic process	1	0.890411	1.18021	0.231358	0.910949	0.902651	9	tags=100%, list=12%, signal=89%	P52176
GO:0043388	positive regulation of DNA binding	1	0.890411	1.18021	0.231358	0.910949	0.902651	9	tags=100%, list=12%, signal=89%	P52176
GO:0043393	regulation of protein binding	1	0.890411	1.18021	0.231358	0.910949	0.902651	9	tags=100%, list=12%, signal=89%	P52176
GO:0044703	multi-organism reproductive process	1	0.890411	1.18021	0.231358	0.910949	0.902651	9	tags=100%, list=12%, signal=89%	P52176
GO:0044706	multi-multicellular organism process	1	0.890411	1.18021	0.231358	0.910949	0.902651	9	tags=100%, list=12%, signal=89%	P52176
GO:0045742	positive regulation of epidermal growth factor receptor signaling pathway	1	0.890411	1.18021	0.231358	0.910949	0.902651	9	tags=100%, list=12%, signal=89%	P52176
GO:0046686	response to cadmium ion	1	0.890411	1.18021	0.231358	0.910949	0.902651	9	tags=100%, list=12%, signal=89%	P52176
GO:0051098	regulation of binding	1	0.890411	1.18021	0.231358	0.910949	0.902651	9	tags=100%, list=12%, signal=89%	P52176
GO:0051099	positive regulation of binding	1	0.890411	1.18021	0.231358	0.910949	0.902651	9	tags=100%, list=12%, signal=89%	P52176
GO:0051101	regulation of DNA binding	1	0.890411	1.18021	0.231358	0.910949	0.902651	9	tags=100%, list=12%, signal=89%	P52176
GO:0051546	keratinocyte migration	1	0.890411	1.18021	0.231358	0.910949	0.902651	9	tags=100%, list=12%, signal=89%	P52176
GO:0051547	regulation of keratinocyte migration	1	0.890411	1.18021	0.231358	0.910949	0.902651	9	tags=100%, list=12%, signal=89%	P52176
GO:0051549	positive regulation of keratinocyte migration	1	0.890411	1.18021	0.231358	0.910949	0.902651	9	tags=100%, list=12%, signal=89%	P52176
GO:0051704	multi-organism process	1	0.890411	1.18021	0.231358	0.910949	0.902651	9	tags=100%, list=12%, signal=89%	P52176
GO:0055085	transmembrane transport	1	0.890411	1.18021	0.231358	0.910949	0.902651	9	tags=100%, list=12%, signal=89%	P52176
GO:0060548	negative regulation of cell death	1	0.890411	1.18021	0.231358	0.910949	0.902651	9	tags=100%, list=12%, signal=89%	P52176
GO:0061005	cell differentiation involved in kidney development	1	0.890411	1.18021	0.231358	0.910949	0.902651	9	tags=100%, list=12%, signal=89%	P52176
GO:0062197	cellular response to chemical stress	1	0.890411	1.18021	0.231358	0.910949	0.902651	9	tags=100%, list=12%, signal=89%	P52176
GO:0071241	cellular response to inorganic substance	1	0.890411	1.18021	0.231358	0.910949	0.902651	9	tags=100%, list=12%, signal=89%	P52176
GO:0071248	cellular response to metal ion	1	0.890411	1.18021	0.231358	0.910949	0.902651	9	tags=100%, list=12%, signal=89%	P52176
GO:0071276	cellular response to cadmium ion	1	0.890411	1.18021	0.231358	0.910949	0.902651	9	tags=100%, list=12%, signal=89%	P52176
GO:0072001	renal system development	1	0.890411	1.18021	0.231358	0.910949	0.902651	9	tags=100%, list=12%, signal=89%	P52176
GO:0090183	regulation of kidney development	1	0.890411	1.18021	0.231358	0.910949	0.902651	9	tags=100%, list=12%, signal=89%	P52176
GO:0090185	negative regulation of kidney development	1	0.890411	1.18021	0.231358	0.910949	0.902651	9	tags=100%, list=12%, signal=89%	P52176
GO:0090199	regulation of release of cytochrome c from mitochondria	1	0.890411	1.18021	0.231358	0.910949	0.902651	9	tags=100%, list=12%, signal=89%	P52176
GO:0090200	positive regulation of release of cytochrome c from mitochondria	1	0.890411	1.18021	0.231358	0.910949	0.902651	9	tags=100%, list=12%, signal=89%	P52176
GO:0097190	apoptotic signaling pathway	1	0.890411	1.18021	0.231358	0.910949	0.902651	9	tags=100%, list=12%, signal=89%	P52176
GO:0097193	intrinsic apoptotic signaling pathway	1	0.890411	1.18021	0.231358	0.910949	0.902651	9	tags=100%, list=12%, signal=89%	P52176
GO:0098655	cation transmembrane transport	1	0.890411	1.18021	0.231358	0.910949	0.902651	9	tags=100%, list=12%, signal=89%	P52176
GO:1900120	regulation of receptor binding	1	0.890411	1.18021	0.231358	0.910949	0.902651	9	tags=100%, list=12%, signal=89%	P52176
GO:1900122	positive regulation of receptor binding	1	0.890411	1.18021	0.231358	0.910949	0.902651	9	tags=100%, list=12%, signal=89%	P52176
GO:1901184	regulation of ERBB signaling pathway	1	0.890411	1.18021	0.231358	0.910949	0.902651	9	tags=100%, list=12%, signal=89%	P52176
GO:1901186	positive regulation of ERBB signaling pathway	1	0.890411	1.18021	0.231358	0.910949	0.902651	9	tags=100%, list=12%, signal=89%	P52176
GO:1902532	negative regulation of intracellular signal transduction	1	0.890411	1.18021	0.231358	0.910949	0.902651	9	tags=100%, list=12%, signal=89%	P52176
GO:1904062	regulation of cation transmembrane transport	1	0.890411	1.18021	0.231358	0.910949	0.902651	9	tags=100%, list=12%, signal=89%	P52176
GO:1904063	negative regulation of cation transmembrane transport	1	0.890411	1.18021	0.231358	0.910949	0.902651	9	tags=100%, list=12%, signal=89%	P52176
GO:1904645	response to amyloid-beta	1	0.890411	1.18021	0.231358	0.910949	0.902651	9	tags=100%, list=12%, signal=89%	P52176
GO:1904705	regulation of vascular associated smooth muscle cell proliferation	1	0.890411	1.18021	0.231358	0.910949	0.902651	9	tags=100%, list=12%, signal=89%	P52176
GO:1904707	positive regulation of vascular associated smooth muscle cell proliferation	1	0.890411	1.18021	0.231358	0.910949	0.902651	9	tags=100%, list=12%, signal=89%	P52176
GO:1990874	vascular associated smooth muscle cell proliferation	1	0.890411	1.18021	0.231358	0.910949	0.902651	9	tags=100%, list=12%, signal=89%	P52176
GO:2000116	regulation of cysteine-type endopeptidase activity	1	0.890411	1.18021	0.231358	0.910949	0.902651	9	tags=100%, list=12%, signal=89%	P52176
GO:2000117	negative regulation of cysteine-type endopeptidase activity	1	0.890411	1.18021	0.231358	0.910949	0.902651	9	tags=100%, list=12%, signal=89%	P52176
GO:2000696	regulation of epithelial cell differentiation involved in kidney development	1	0.890411	1.18021	0.231358	0.910949	0.902651	9	tags=100%, list=12%, signal=89%	P52176
GO:2000697	negative regulation of epithelial cell differentiation involved in kidney development	1	0.890411	1.18021	0.231358	0.910949	0.902651	9	tags=100%, list=12%, signal=89%	P52176
GO:2001233	regulation of apoptotic signaling pathway	1	0.890411	1.18021	0.231358	0.910949	0.902651	9	tags=100%, list=12%, signal=89%	P52176
GO:2001234	negative regulation of apoptotic signaling pathway	1	0.890411	1.18021	0.231358	0.910949	0.902651	9	tags=100%, list=12%, signal=89%	P52176
GO:2001235	positive regulation of apoptotic signaling pathway	1	0.890411	1.18021	0.231358	0.910949	0.902651	9	tags=100%, list=12%, signal=89%	P52176
GO:2001242	regulation of intrinsic apoptotic signaling pathway	1	0.890411	1.18021	0.231358	0.910949	0.902651	9	tags=100%, list=12%, signal=89%	P52176
GO:2001243	negative regulation of intrinsic apoptotic signaling pathway	1	0.890411	1.18021	0.231358	0.910949	0.902651	9	tags=100%, list=12%, signal=89%	P52176
GO:2001257	regulation of cation channel activity	1	0.890411	1.18021	0.231358	0.910949	0.902651	9	tags=100%, list=12%, signal=89%	P52176
GO:2001258	negative regulation of cation channel activity	1	0.890411	1.18021	0.231358	0.910949	0.902651	9	tags=100%, list=12%, signal=89%	P52176
GO:2001267	regulation of cysteine-type endopeptidase activity involved in apoptotic signaling pathway	1	0.890411	1.18021	0.231358	0.910949	0.902651	9	tags=100%, list=12%, signal=89%	P52176
GO:2001268	negative regulation of cysteine-type endopeptidase activity involved in apoptotic signaling pathway	1	0.890411	1.18021	0.231358	0.910949	0.902651	9	tags=100%, list=12%, signal=89%	P52176
GO:0033043	regulation of organelle organization	6	0.516277	1.19485	0.232117	0.910949	0.902651	9	tags=33%, list=12%, signal=32%	Q9TU03/P52176
GO:0048513	animal organ development	4	0.599701	1.21155	0.2375	0.925094	0.916667	9	tags=50%, list=12%, signal=46%	Q8SPP7/P52176
GO:2000026	regulation of multicellular organismal development	4	0.599701	1.21155	0.2375	0.925094	0.916667	9	tags=50%, list=12%, signal=46%	Q8SPP7/P52176
GO:0080134	regulation of response to stress	5	0.550224	1.19139	0.240487	0.933233	0.924732	1	tags=20%, list=1%, signal=21%	Q8SPP7
GO:0001775	cell activation	2	0.708767	1.14397	0.247849	0.947656	0.939024	1	tags=50%, list=1%, signal=51%	Q8SPP7
GO:0002263	cell activation involved in immune response	2	0.708767	1.14397	0.247849	0.947656	0.939024	1	tags=50%, list=1%, signal=51%	Q8SPP7
GO:0002366	leukocyte activation involved in immune response	2	0.708767	1.14397	0.247849	0.947656	0.939024	1	tags=50%, list=1%, signal=51%	Q8SPP7
GO:0045321	leukocyte activation	2	0.708767	1.14397	0.247849	0.947656	0.939024	1	tags=50%, list=1%, signal=51%	Q8SPP7
GO:0030154	cell differentiation	5	0.544718	1.17947	0.254186	0.957801	0.949076	9	tags=40%, list=12%, signal=38%	Q8SPP7/P52176
GO:0045595	regulation of cell differentiation	5	0.544718	1.17947	0.254186	0.957801	0.949076	9	tags=40%, list=12%, signal=38%	Q8SPP7/P52176
GO:0048869	cellular developmental process	5	0.544718	1.17947	0.254186	0.957801	0.949076	9	tags=40%, list=12%, signal=38%	Q8SPP7/P52176
GO:0050793	regulation of developmental process	5	0.544718	1.17947	0.254186	0.957801	0.949076	9	tags=40%, list=12%, signal=38%	Q8SPP7/P52176
GO:0005975	carbohydrate metabolic process	1	-0.876712	-1.17265	0.273486	0.977409	0.968505	11	tags=100%, list=15%, signal=86%
GO:0006081	cellular aldehyde metabolic process	1	-0.876712	-1.17265	0.273486	0.977409	0.968505	11	tags=100%, list=15%, signal=86%
GO:0006091	generation of precursor metabolites and energy	1	-0.876712	-1.17265	0.273486	0.977409	0.968505	11	tags=100%, list=15%, signal=86%
GO:0006097	glyoxylate cycle	1	-0.876712	-1.17265	0.273486	0.977409	0.968505	11	tags=100%, list=15%, signal=86%
GO:0006099	tricarboxylic acid cycle	1	-0.876712	-1.17265	0.273486	0.977409	0.968505	11	tags=100%, list=15%, signal=86%
GO:0006102	isocitrate metabolic process	1	-0.876712	-1.17265	0.273486	0.977409	0.968505	11	tags=100%, list=15%, signal=86%
GO:0006103	2-oxoglutarate metabolic process	1	-0.876712	-1.17265	0.273486	0.977409	0.968505	11	tags=100%, list=15%, signal=86%
GO:0009060	aerobic respiration	1	-0.876712	-1.17265	0.273486	0.977409	0.968505	11	tags=100%, list=15%, signal=86%
GO:0015980	energy derivation by oxidation of organic compounds	1	-0.876712	-1.17265	0.273486	0.977409	0.968505	11	tags=100%, list=15%, signal=86%
GO:0043648	dicarboxylic acid metabolic process	1	-0.876712	-1.17265	0.273486	0.977409	0.968505	11	tags=100%, list=15%, signal=86%
GO:0044262	cellular carbohydrate metabolic process	1	-0.876712	-1.17265	0.273486	0.977409	0.968505	11	tags=100%, list=15%, signal=86%
GO:0045333	cellular respiration	1	-0.876712	-1.17265	0.273486	0.977409	0.968505	11	tags=100%, list=15%, signal=86%
GO:0046487	glyoxylate metabolic process	1	-0.876712	-1.17265	0.273486	0.977409	0.968505	11	tags=100%, list=15%, signal=86%
GO:0072350	tricarboxylic acid metabolic process	1	-0.876712	-1.17265	0.273486	0.977409	0.968505	11	tags=100%, list=15%, signal=86%
GO:1902652	secondary alcohol metabolic process	1	-0.876712	-1.17265	0.273486	0.977409	0.968505	11	tags=100%, list=15%, signal=86%
GO:0001817	regulation of cytokine production	3	0.621865	1.14271	0.275124	0.979892	0.970966	1	tags=33%, list=1%, signal=34%	Q8SPP7
GO:0009987	cellular process	27	0.33682	1.15438	0.278114	0.987161	0.978169	15	tags=30%, list=20%, signal=37%	Q8SPP7/P22226/Q2TBU0/Q9TU03/P52176/P33046/Q58CQ9/Q3SZV7
GO:0051495	positive regulation of cytoskeleton organization	3	-0.56338	-1.13887	0.288945	0.997814	0.988724	35	tags=100%, list=47%, signal=55%	P28800/Q3SX14
GO:1902533	positive regulation of intracellular signal transduction	3	-0.56338	-1.13887	0.288945	0.997814	0.988724	35	tags=100%, list=47%, signal=55%	P28800/P26201
GO:1902905	positive regulation of supramolecular fiber organization	3	-0.56338	-1.13887	0.288945	0.997814	0.988724	35	tags=100%, list=47%, signal=55%	P28800/Q3SX14
GO:0006066	alcohol metabolic process	2	-0.708333	-1.20368	0.293427	0.997814	0.988724	24	tags=100%, list=32%, signal=69%	Q9XSG3
GO:1901615	organic hydroxy compound metabolic process	2	-0.708333	-1.20368	0.293427	0.997814	0.988724	24	tags=100%, list=32%, signal=69%	Q9XSG3
GO:0002252	immune effector process	5	0.533564	1.15531	0.29376	0.997814	0.988724	14	tags=40%, list=19%, signal=35%	Q8SPP7/Q28085
GO:0006575	cellular modified amino acid metabolic process	1	0.849315	1.12574	0.298279	0.997814	0.988724	12	tags=100%, list=16%, signal=85%	Q58CQ9
GO:0006766	vitamin metabolic process	1	0.849315	1.12574	0.298279	0.997814	0.988724	12	tags=100%, list=16%, signal=85%	Q58CQ9
GO:0006767	water-soluble vitamin metabolic process	1	0.849315	1.12574	0.298279	0.997814	0.988724	12	tags=100%, list=16%, signal=85%	Q58CQ9
GO:0015939	pantothenate metabolic process	1	0.849315	1.12574	0.298279	0.997814	0.988724	12	tags=100%, list=16%, signal=85%	Q58CQ9
GO:0051241	negative regulation of multicellular organismal process	7	0.460645	1.11267	0.325811	0.997814	0.988724	29	tags=57%, list=39%, signal=38%	Q8SPP7/P52176/P19035/P48616
GO:0000165	MAPK cascade	2	-0.681076	-1.15736	0.326291	0.997814	0.988724	6	tags=100%, list=8%, signal=94%	P26201
GO:0003008	system process	2	-0.681076	-1.15736	0.326291	0.997814	0.988724	6	tags=100%, list=8%, signal=94%	P26201
GO:0023014	signal transduction by protein phosphorylation	2	-0.681076	-1.15736	0.326291	0.997814	0.988724	6	tags=100%, list=8%, signal=94%	P26201
GO:0043408	regulation of MAPK cascade	2	-0.681076	-1.15736	0.326291	0.997814	0.988724	6	tags=100%, list=8%, signal=94%	P26201
GO:0043410	positive regulation of MAPK cascade	2	-0.681076	-1.15736	0.326291	0.997814	0.988724	6	tags=100%, list=8%, signal=94%	P26201
GO:0070371	ERK1 and ERK2 cascade	2	-0.681076	-1.15736	0.326291	0.997814	0.988724	6	tags=100%, list=8%, signal=94%	P26201
GO:0070372	regulation of ERK1 and ERK2 cascade	2	-0.681076	-1.15736	0.326291	0.997814	0.988724	6	tags=100%, list=8%, signal=94%	P26201
GO:0070374	positive regulation of ERK1 and ERK2 cascade	2	-0.681076	-1.15736	0.326291	0.997814	0.988724	6	tags=100%, list=8%, signal=94%	P26201
GO:0010629	negative regulation of gene expression	3	0.593521	1.09063	0.327842	0.997814	0.988724	1	tags=33%, list=1%, signal=34%	Q8SPP7
GO:0051051	negative regulation of transport	2	0.680556	1.09843	0.330465	0.997814	0.988724	25	tags=100%, list=34%, signal=68%	P52176/P19035
GO:0007155	cell adhesion	3	-0.535211	-1.08193	0.334171	0.997814	0.988724	37	tags=100%, list=50%, signal=52%	P15497/P26201
GO:0009611	response to wounding	3	-0.535211	-1.08193	0.334171	0.997814	0.988724	37	tags=100%, list=50%, signal=52%	P28800/P50448
GO:0022610	biological adhesion	3	-0.535211	-1.08193	0.334171	0.997814	0.988724	37	tags=100%, list=50%, signal=52%	P15497/P26201
GO:0030038	contractile actin filament bundle assembly	3	-0.535211	-1.08193	0.334171	0.997814	0.988724	37	tags=100%, list=50%, signal=52%	P15497/P28800
GO:0031032	actomyosin structure organization	3	-0.535211	-1.08193	0.334171	0.997814	0.988724	37	tags=100%, list=50%, signal=52%	P15497/P28800
GO:0032231	regulation of actin filament bundle assembly	3	-0.535211	-1.08193	0.334171	0.997814	0.988724	37	tags=100%, list=50%, signal=52%	P15497/P28800
GO:0042060	wound healing	3	-0.535211	-1.08193	0.334171	0.997814	0.988724	37	tags=100%, list=50%, signal=52%	P28800/P50448
GO:0043149	stress fiber assembly	3	-0.535211	-1.08193	0.334171	0.997814	0.988724	37	tags=100%, list=50%, signal=52%	P15497/P28800
GO:0051017	actin filament bundle assembly	3	-0.535211	-1.08193	0.334171	0.997814	0.988724	37	tags=100%, list=50%, signal=52%	P15497/P28800
GO:0051492	regulation of stress fiber assembly	3	-0.535211	-1.08193	0.334171	0.997814	0.988724	37	tags=100%, list=50%, signal=52%	P15497/P28800
GO:0061041	regulation of wound healing	3	-0.535211	-1.08193	0.334171	0.997814	0.988724	37	tags=100%, list=50%, signal=52%	P28800/P50448
GO:0061572	actin filament bundle organization	3	-0.535211	-1.08193	0.334171	0.997814	0.988724	37	tags=100%, list=50%, signal=52%	P15497/P28800
GO:0110020	regulation of actomyosin structure organization	3	-0.535211	-1.08193	0.334171	0.997814	0.988724	37	tags=100%, list=50%, signal=52%	P15497/P28800
GO:1903034	regulation of response to wounding	3	-0.535211	-1.08193	0.334171	0.997814	0.988724	37	tags=100%, list=50%, signal=52%	P28800/P50448
GO:0007275	multicellular organism development	6	0.479502	1.10973	0.337226	0.997814	0.988724	9	tags=33%, list=12%, signal=32%	Q8SPP7/P52176
GO:0032502	developmental process	6	0.479502	1.10973	0.337226	0.997814	0.988724	9	tags=33%, list=12%, signal=32%	Q8SPP7/P52176
GO:0048731	system development	6	0.479502	1.10973	0.337226	0.997814	0.988724	9	tags=33%, list=12%, signal=32%	Q8SPP7/P52176
GO:0048856	anatomical structure development	6	0.479502	1.10973	0.337226	0.997814	0.988724	9	tags=33%, list=12%, signal=32%	Q8SPP7/P52176
GO:0009057	macromolecule catabolic process	3	0.583391	1.07201	0.357496	0.997814	0.988724	1	tags=33%, list=1%, signal=34%	Q8SPP7
GO:0033036	macromolecule localization	7	-0.358209	-1.05435	0.372014	0.997814	0.988724	51	tags=100%, list=69%, signal=34%	Q2TBI0/P63258/P15497/Q03247/Q3MHX6/P26201
GO:0008284	positive regulation of cell population proliferation	2	0.660252	1.06566	0.375215	0.997814	0.988724	9	tags=50%, list=12%, signal=45%	P52176
GO:0033002	muscle cell proliferation	2	0.660252	1.06566	0.375215	0.997814	0.988724	9	tags=50%, list=12%, signal=45%	P52176
GO:0042127	regulation of cell population proliferation	2	0.660252	1.06566	0.375215	0.997814	0.988724	9	tags=50%, list=12%, signal=45%	P52176
GO:0048659	smooth muscle cell proliferation	2	0.660252	1.06566	0.375215	0.997814	0.988724	9	tags=50%, list=12%, signal=45%	P52176
GO:0048660	regulation of smooth muscle cell proliferation	2	0.660252	1.06566	0.375215	0.997814	0.988724	9	tags=50%, list=12%, signal=45%	P52176
GO:0048661	positive regulation of smooth muscle cell proliferation	2	0.660252	1.06566	0.375215	0.997814	0.988724	9	tags=50%, list=12%, signal=45%	P52176
GO:0009617	response to bacterium	5	0.497326	1.07685	0.375951	0.997814	0.988724	5	tags=40%, list=7%, signal=40%	P22226/Q2TBU0
GO:0009056	catabolic process	4	0.52782	1.06633	0.382812	0.997814	0.988724	29	tags=75%, list=39%, signal=48%	Q8SPP7/P19035/P48616
GO:1901575	organic substance catabolic process	4	0.52782	1.06633	0.382812	0.997814	0.988724	29	tags=75%, list=39%, signal=48%	Q8SPP7/P19035/P48616
GO:0006511	ubiquitin-dependent protein catabolic process	1	-0.821918	-1.09936	0.386221	0.997814	0.988724	15	tags=100%, list=20%, signal=81%
GO:0006621	protein retention in ER lumen	1	-0.821918	-1.09936	0.386221	0.997814	0.988724	15	tags=100%, list=20%, signal=81%
GO:0010498	proteasomal protein catabolic process	1	-0.821918	-1.09936	0.386221	0.997814	0.988724	15	tags=100%, list=20%, signal=81%
GO:0019941	modification-dependent protein catabolic process	1	-0.821918	-1.09936	0.386221	0.997814	0.988724	15	tags=100%, list=20%, signal=81%
GO:0030163	protein catabolic process	1	-0.821918	-1.09936	0.386221	0.997814	0.988724	15	tags=100%, list=20%, signal=81%
GO:0030433	ubiquitin-dependent ERAD pathway	1	-0.821918	-1.09936	0.386221	0.997814	0.988724	15	tags=100%, list=20%, signal=81%
GO:0032507	maintenance of protein location in cell	1	-0.821918	-1.09936	0.386221	0.997814	0.988724	15	tags=100%, list=20%, signal=81%
GO:0033365	protein localization to organelle	1	-0.821918	-1.09936	0.386221	0.997814	0.988724	15	tags=100%, list=20%, signal=81%
GO:0034613	cellular protein localization	1	-0.821918	-1.09936	0.386221	0.997814	0.988724	15	tags=100%, list=20%, signal=81%
GO:0034976	response to endoplasmic reticulum stress	1	-0.821918	-1.09936	0.386221	0.997814	0.988724	15	tags=100%, list=20%, signal=81%
GO:0035437	maintenance of protein localization in endoplasmic reticulum	1	-0.821918	-1.09936	0.386221	0.997814	0.988724	15	tags=100%, list=20%, signal=81%
GO:0036503	ERAD pathway	1	-0.821918	-1.09936	0.386221	0.997814	0.988724	15	tags=100%, list=20%, signal=81%
GO:0043161	proteasome-mediated ubiquitin-dependent protein catabolic process	1	-0.821918	-1.09936	0.386221	0.997814	0.988724	15	tags=100%, list=20%, signal=81%
GO:0043632	modification-dependent macromolecule catabolic process	1	-0.821918	-1.09936	0.386221	0.997814	0.988724	15	tags=100%, list=20%, signal=81%
GO:0044257	cellular protein catabolic process	1	-0.821918	-1.09936	0.386221	0.997814	0.988724	15	tags=100%, list=20%, signal=81%
GO:0045185	maintenance of protein location	1	-0.821918	-1.09936	0.386221	0.997814	0.988724	15	tags=100%, list=20%, signal=81%
GO:0051603	proteolysis involved in cellular protein catabolic process	1	-0.821918	-1.09936	0.386221	0.997814	0.988724	15	tags=100%, list=20%, signal=81%
GO:0051641	cellular localization	1	-0.821918	-1.09936	0.386221	0.997814	0.988724	15	tags=100%, list=20%, signal=81%
GO:0051651	maintenance of location in cell	1	-0.821918	-1.09936	0.386221	0.997814	0.988724	15	tags=100%, list=20%, signal=81%
GO:0070727	cellular macromolecule localization	1	-0.821918	-1.09936	0.386221	0.997814	0.988724	15	tags=100%, list=20%, signal=81%
GO:0070972	protein localization to endoplasmic reticulum	1	-0.821918	-1.09936	0.386221	0.997814	0.988724	15	tags=100%, list=20%, signal=81%
GO:0072595	maintenance of protein localization in organelle	1	-0.821918	-1.09936	0.386221	0.997814	0.988724	15	tags=100%, list=20%, signal=81%
GO:0009308	amine metabolic process	1	0.794521	1.05311	0.414914	0.997814	0.988724	16	tags=100%, list=22%, signal=79%	Q29437
GO:0015886	heme transport	1	0.808219	1.07127	0.414914	0.997814	0.988724	15	tags=100%, list=20%, signal=81%	Q3SZV7
GO:0071705	nitrogen compound transport	1	0.808219	1.07127	0.414914	0.997814	0.988724	15	tags=100%, list=20%, signal=81%	Q3SZV7
GO:1901678	iron coordination entity transport	1	0.808219	1.07127	0.414914	0.997814	0.988724	15	tags=100%, list=20%, signal=81%	Q3SZV7
GO:1901701	cellular response to oxygen-containing compound	3	0.56338	1.03524	0.415157	0.997814	0.988724	34	tags=100%, list=46%, signal=56%	P52176/P48616/Q2TBI0
GO:0070887	cellular response to chemical stimulus	5	0.479335	1.03789	0.427702	0.997814	0.988724	34	tags=80%, list=46%, signal=46%	Q2TBU0/P52176/P48616/Q2TBI0
GO:0006996	organelle organization	8	0.411212	1.03693	0.431507	0.997814	0.988724	43	tags=88%, list=58%, signal=41%	Q9TU03/P52176/P02584/P48616/P63258/P15497/P28800
GO:0001667	ameboidal-type cell migration	2	0.63448	1.02407	0.44062	0.997814	0.988724	9	tags=50%, list=12%, signal=45%	P52176
GO:0007369	gastrulation	2	0.63448	1.02407	0.44062	0.997814	0.988724	9	tags=50%, list=12%, signal=45%	P52176
GO:0009968	negative regulation of signal transduction	2	0.63448	1.02407	0.44062	0.997814	0.988724	9	tags=50%, list=12%, signal=45%	P52176
GO:0010631	epithelial cell migration	2	0.63448	1.02407	0.44062	0.997814	0.988724	9	tags=50%, list=12%, signal=45%	P52176
GO:0010648	negative regulation of cell communication	2	0.63448	1.02407	0.44062	0.997814	0.988724	9	tags=50%, list=12%, signal=45%	P52176
GO:0023057	negative regulation of signaling	2	0.63448	1.02407	0.44062	0.997814	0.988724	9	tags=50%, list=12%, signal=45%	P52176
GO:0043269	regulation of ion transport	2	0.63448	1.02407	0.44062	0.997814	0.988724	9	tags=50%, list=12%, signal=45%	P52176
GO:0048598	embryonic morphogenesis	2	0.63448	1.02407	0.44062	0.997814	0.988724	9	tags=50%, list=12%, signal=45%	P52176
GO:0090130	tissue migration	2	0.63448	1.02407	0.44062	0.997814	0.988724	9	tags=50%, list=12%, signal=45%	P52176
GO:0090132	epithelium migration	2	0.63448	1.02407	0.44062	0.997814	0.988724	9	tags=50%, list=12%, signal=45%	P52176
GO:0006955	immune response	8	0.403184	1.01669	0.445205	0.997814	0.988724	14	tags=38%, list=19%, signal=34%	Q8SPP7/Q0VCG9/Q28085
GO:0006957	complement activation, alternative pathway	2	0.629655	1.01628	0.449225	0.997814	0.988724	14	tags=50%, list=19%, signal=42%	Q28085
GO:0050829	defense response to Gram-negative bacterium	2	0.633915	1.02315	0.449225	0.997814	0.988724	4	tags=50%, list=5%, signal=49%	P22226
GO:0007596	blood coagulation	2	-0.583333	-0.991264	0.464789	0.997814	0.988724	33	tags=100%, list=45%, signal=57%	P50448
GO:0007599	hemostasis	2	-0.583333	-0.991264	0.464789	0.997814	0.988724	33	tags=100%, list=45%, signal=57%	P50448
GO:0030193	regulation of blood coagulation	2	-0.583333	-0.991264	0.464789	0.997814	0.988724	33	tags=100%, list=45%, signal=57%	P50448
GO:0030195	negative regulation of blood coagulation	2	-0.583333	-0.991264	0.464789	0.997814	0.988724	33	tags=100%, list=45%, signal=57%	P50448
GO:0042730	fibrinolysis	2	-0.583333	-0.991264	0.464789	0.997814	0.988724	33	tags=100%, list=45%, signal=57%	P50448
GO:0050817	coagulation	2	-0.583333	-0.991264	0.464789	0.997814	0.988724	33	tags=100%, list=45%, signal=57%	P50448
GO:0050818	regulation of coagulation	2	-0.583333	-0.991264	0.464789	0.997814	0.988724	33	tags=100%, list=45%, signal=57%	P50448
GO:0050819	negative regulation of coagulation	2	-0.583333	-0.991264	0.464789	0.997814	0.988724	33	tags=100%, list=45%, signal=57%	P50448
GO:0050878	regulation of body fluid levels	2	-0.583333	-0.991264	0.464789	0.997814	0.988724	33	tags=100%, list=45%, signal=57%	P50448
GO:0061045	negative regulation of wound healing	2	-0.583333	-0.991264	0.464789	0.997814	0.988724	33	tags=100%, list=45%, signal=57%	P50448
GO:0090066	regulation of anatomical structure size	2	-0.583333	-0.991264	0.464789	0.997814	0.988724	33	tags=100%, list=45%, signal=57%	Q3SX14
GO:1900046	regulation of hemostasis	2	-0.583333	-0.991264	0.464789	0.997814	0.988724	33	tags=100%, list=45%, signal=57%	P50448
GO:1900047	negative regulation of hemostasis	2	-0.583333	-0.991264	0.464789	0.997814	0.988724	33	tags=100%, list=45%, signal=57%	P50448
GO:1903035	negative regulation of response to wounding	2	-0.583333	-0.991264	0.464789	0.997814	0.988724	33	tags=100%, list=45%, signal=57%	P50448
GO:0007167	enzyme linked receptor protein signaling pathway	2	0.625	1.00877	0.471601	0.997814	0.988724	29	tags=100%, list=39%, signal=62%	P52176/P48616
GO:0030855	epithelial cell differentiation	2	0.625	1.00877	0.471601	0.997814	0.988724	29	tags=100%, list=39%, signal=62%	P52176/P48616
GO:0043603	cellular amide metabolic process	2	0.625	1.00877	0.471601	0.997814	0.988724	29	tags=100%, list=39%, signal=62%	Q58CQ9/P48616
GO:1901652	response to peptide	2	0.625	1.00877	0.471601	0.997814	0.988724	29	tags=100%, list=39%, signal=62%	P52176/P48616
GO:0009059	macromolecule biosynthetic process	4	-0.4	-0.944347	0.487671	0.997814	0.988724	47	tags=100%, list=64%, signal=39%	P15497/P28800/Q03247
GO:0034645	cellular macromolecule biosynthetic process	4	-0.4	-0.944347	0.487671	0.997814	0.988724	47	tags=100%, list=64%, signal=39%	P15497/P28800/Q03247
GO:0051239	regulation of multicellular organismal process	9	0.379176	1.00572	0.495968	0.997814	0.988724	43	tags=78%, list=58%, signal=37%	Q8SPP7/P52176/P19035/P48616/Q2TBI0/P15497/P28800
GO:0009892	negative regulation of metabolic process	9	0.373336	0.990229	0.508065	0.997814	0.988724	29	tags=56%, list=39%, signal=38%	Q8SPP7/P52176/P19035/Q7SIH1/P48616
GO:0010468	regulation of gene expression	5	0.449275	0.972806	0.520548	0.997814	0.988724	43	tags=100%, list=58%, signal=45%	Q8SPP7/P48616/Q2TBI0/P63258/P28800
GO:0032233	positive regulation of actin filament bundle assembly	2	-0.555556	-0.944061	0.525822	0.997814	0.988724	35	tags=100%, list=47%, signal=54%	P28800
GO:0042158	lipoprotein biosynthetic process	2	-0.555556	-0.944061	0.525822	0.997814	0.988724	35	tags=100%, list=47%, signal=54%	Q03247
GO:0045597	positive regulation of cell differentiation	2	-0.555556	-0.944061	0.525822	0.997814	0.988724	35	tags=100%, list=47%, signal=54%	P28800
GO:0051094	positive regulation of developmental process	2	-0.555556	-0.944061	0.525822	0.997814	0.988724	35	tags=100%, list=47%, signal=54%	P28800
GO:0051235	maintenance of location	2	-0.555556	-0.944061	0.525822	0.997814	0.988724	35	tags=100%, list=47%, signal=54%	Q3MHX6
GO:0051496	positive regulation of stress fiber assembly	2	-0.555556	-0.944061	0.525822	0.997814	0.988724	35	tags=100%, list=47%, signal=54%	P28800
GO:0002253	activation of immune response	3	0.522264	0.959688	0.527183	0.997814	0.988724	14	tags=33%, list=19%, signal=28%	Q28085
GO:0002684	positive regulation of immune system process	3	0.522264	0.959688	0.527183	0.997814	0.988724	14	tags=33%, list=19%, signal=28%	Q28085
GO:0006956	complement activation	3	0.522264	0.959688	0.527183	0.997814	0.988724	14	tags=33%, list=19%, signal=28%	Q28085
GO:0007265	Ras protein signal transduction	3	0.521573	0.958419	0.527183	0.997814	0.988724	25	tags=67%, list=34%, signal=46%	Q9TU03/P19035
GO:0007266	Rho protein signal transduction	3	0.521573	0.958419	0.527183	0.997814	0.988724	25	tags=67%, list=34%, signal=46%	Q9TU03/P19035
GO:0035023	regulation of Rho protein signal transduction	3	0.521573	0.958419	0.527183	0.997814	0.988724	25	tags=67%, list=34%, signal=46%	Q9TU03/P19035
GO:0046578	regulation of Ras protein signal transduction	3	0.521573	0.958419	0.527183	0.997814	0.988724	25	tags=67%, list=34%, signal=46%	Q9TU03/P19035
GO:0050778	positive regulation of immune response	3	0.522264	0.959688	0.527183	0.997814	0.988724	14	tags=33%, list=19%, signal=28%	Q28085
GO:0051056	regulation of small GTPase mediated signal transduction	3	0.521573	0.958419	0.527183	0.997814	0.988724	25	tags=67%, list=34%, signal=46%	Q9TU03/P19035
GO:0044238	primary metabolic process	14	-0.251854	-0.957831	0.528634	0.997814	0.988724	51	tags=93%, list=69%, signal=36%	P19035/Q7SIH1/P48616/Q3T052/P15497/P28800/P81187/O46375/Q03247/Q3MHX6/P13696/Q9XSG3/P26201
GO:0030334	regulation of cell migration	2	0.591203	0.954217	0.549053	0.997814	0.988724	9	tags=50%, list=12%, signal=45%	P52176
GO:0030335	positive regulation of cell migration	2	0.591203	0.954217	0.549053	0.997814	0.988724	9	tags=50%, list=12%, signal=45%	P52176
GO:0040012	regulation of locomotion	2	0.591203	0.954217	0.549053	0.997814	0.988724	9	tags=50%, list=12%, signal=45%	P52176
GO:0040017	positive regulation of locomotion	2	0.591203	0.954217	0.549053	0.997814	0.988724	9	tags=50%, list=12%, signal=45%	P52176
GO:0048646	anatomical structure formation involved in morphogenesis	2	0.591203	0.954217	0.549053	0.997814	0.988724	9	tags=50%, list=12%, signal=45%	P52176
GO:0051270	regulation of cellular component movement	2	0.591203	0.954217	0.549053	0.997814	0.988724	9	tags=50%, list=12%, signal=45%	P52176
GO:0051272	positive regulation of cellular component movement	2	0.591203	0.954217	0.549053	0.997814	0.988724	9	tags=50%, list=12%, signal=45%	P52176
GO:2000145	regulation of cell motility	2	0.591203	0.954217	0.549053	0.997814	0.988724	9	tags=50%, list=12%, signal=45%	P52176
GO:2000147	positive regulation of cell motility	2	0.591203	0.954217	0.549053	0.997814	0.988724	9	tags=50%, list=12%, signal=45%	P52176
GO:0051049	regulation of transport	3	0.51682	0.949685	0.555189	0.997814	0.988724	25	tags=67%, list=34%, signal=46%	P52176/P19035
GO:0034377	plasma lipoprotein particle assembly	1	-0.726027	-0.971098	0.555324	0.997814	0.988724	22	tags=100%, list=30%, signal=71%
GO:0034380	high-density lipoprotein particle assembly	1	-0.726027	-0.971098	0.555324	0.997814	0.988724	22	tags=100%, list=30%, signal=71%
GO:0034447	very-low-density lipoprotein particle clearance	1	-0.726027	-0.971098	0.555324	0.997814	0.988724	22	tags=100%, list=30%, signal=71%
GO:0065005	protein-lipid complex assembly	1	-0.726027	-0.971098	0.555324	0.997814	0.988724	22	tags=100%, list=30%, signal=71%
GO:0071831	intermediate-density lipoprotein particle clearance	1	-0.726027	-0.971098	0.555324	0.997814	0.988724	22	tags=100%, list=30%, signal=71%
GO:0097242	amyloid-beta clearance	1	-0.726027	-0.971098	0.555324	0.997814	0.988724	22	tags=100%, list=30%, signal=71%
GO:1900221	regulation of amyloid-beta clearance	1	-0.726027	-0.971098	0.555324	0.997814	0.988724	22	tags=100%, list=30%, signal=71%
GO:1900223	positive regulation of amyloid-beta clearance	1	-0.726027	-0.971098	0.555324	0.997814	0.988724	22	tags=100%, list=30%, signal=71%
GO:1902904	negative regulation of supramolecular fiber organization	1	-0.726027	-0.971098	0.555324	0.997814	0.988724	22	tags=100%, list=30%, signal=71%
GO:1905906	regulation of amyloid fibril formation	1	-0.726027	-0.971098	0.555324	0.997814	0.988724	22	tags=100%, list=30%, signal=71%
GO:1905907	negative regulation of amyloid fibril formation	1	-0.726027	-0.971098	0.555324	0.997814	0.988724	22	tags=100%, list=30%, signal=71%
GO:0032879	regulation of localization	4	0.471429	0.952409	0.55625	0.997814	0.988724	41	tags=100%, list=55%, signal=47%	P52176/P19035/P63258/P15497
GO:0007010	cytoskeleton organization	7	0.393088	0.94949	0.557123	0.997814	0.988724	43	tags=86%, list=58%, signal=40%	Q9TU03/P02584/P48616/P63258/P15497/P28800
GO:0002920	regulation of humoral immune response	1	-0.712329	-0.952775	0.584551	0.997814	0.988724	23	tags=100%, list=31%, signal=70%
GO:0002921	negative regulation of humoral immune response	1	-0.712329	-0.952775	0.584551	0.997814	0.988724	23	tags=100%, list=31%, signal=70%
GO:0030449	regulation of complement activation	1	-0.712329	-0.952775	0.584551	0.997814	0.988724	23	tags=100%, list=31%, signal=70%
GO:0045916	negative regulation of complement activation	1	-0.712329	-0.952775	0.584551	0.997814	0.988724	23	tags=100%, list=31%, signal=70%
GO:0000041	transition metal ion transport	2	0.575885	0.929494	0.585198	0.997814	0.988724	15	tags=50%, list=20%, signal=41%	Q3SZV7
GO:0006826	iron ion transport	2	0.575885	0.929494	0.585198	0.997814	0.988724	15	tags=50%, list=20%, signal=41%	Q3SZV7
GO:0006879	cellular iron ion homeostasis	2	0.575885	0.929494	0.585198	0.997814	0.988724	15	tags=50%, list=20%, signal=41%	Q3SZV7
GO:0030001	metal ion transport	2	0.575885	0.929494	0.585198	0.997814	0.988724	15	tags=50%, list=20%, signal=41%	Q3SZV7
GO:0046916	cellular transition metal ion homeostasis	2	0.575885	0.929494	0.585198	0.997814	0.988724	15	tags=50%, list=20%, signal=41%	Q3SZV7
GO:0055072	iron ion homeostasis	2	0.575885	0.929494	0.585198	0.997814	0.988724	15	tags=50%, list=20%, signal=41%	Q3SZV7
GO:0055076	transition metal ion homeostasis	2	0.575885	0.929494	0.585198	0.997814	0.988724	15	tags=50%, list=20%, signal=41%	Q3SZV7
GO:0006869	lipid transport	5	-0.347826	-0.900534	0.586705	0.997814	0.988724	51	tags=100%, list=69%, signal=33%	Q2TBI0/P15497/Q03247/P26201
GO:0009058	biosynthetic process	5	-0.347826	-0.900534	0.586705	0.997814	0.988724	51	tags=100%, list=69%, signal=33%	P48616/P15497/P28800/Q03247
GO:0010876	lipid localization	5	-0.347826	-0.900534	0.586705	0.997814	0.988724	51	tags=100%, list=69%, signal=33%	Q2TBI0/P15497/Q03247/P26201
GO:0043933	protein-containing complex subunit organization	5	-0.347826	-0.900534	0.586705	0.997814	0.988724	51	tags=60%, list=69%, signal=20%	Q3SX14/Q03247/P26201
GO:0044249	cellular biosynthetic process	5	-0.347826	-0.900534	0.586705	0.997814	0.988724	51	tags=100%, list=69%, signal=33%	P48616/P15497/P28800/Q03247
GO:1901576	organic substance biosynthetic process	5	-0.347826	-0.900534	0.586705	0.997814	0.988724	51	tags=100%, list=69%, signal=33%	P48616/P15497/P28800/Q03247
GO:0001568	blood vessel development	2	-0.527778	-0.896858	0.586854	0.997814	0.988724	37	tags=100%, list=50%, signal=51%	P28800
GO:0001944	vasculature development	2	-0.527778	-0.896858	0.586854	0.997814	0.988724	37	tags=100%, list=50%, signal=51%	P28800
GO:0008104	protein localization	2	-0.527778	-0.896858	0.586854	0.997814	0.988724	37	tags=100%, list=50%, signal=51%	Q3MHX6
GO:0010810	regulation of cell-substrate adhesion	2	-0.527778	-0.896858	0.586854	0.997814	0.988724	37	tags=100%, list=50%, signal=51%	P15497
GO:0030155	regulation of cell adhesion	2	-0.527778	-0.896858	0.586854	0.997814	0.988724	37	tags=100%, list=50%, signal=51%	P15497
GO:0031589	cell-substrate adhesion	2	-0.527778	-0.896858	0.586854	0.997814	0.988724	37	tags=100%, list=50%, signal=51%	P15497
GO:0035239	tube morphogenesis	2	-0.527778	-0.896858	0.586854	0.997814	0.988724	37	tags=100%, list=50%, signal=51%	P28800
GO:0035295	tube development	2	-0.527778	-0.896858	0.586854	0.997814	0.988724	37	tags=100%, list=50%, signal=51%	P28800
GO:0048514	blood vessel morphogenesis	2	-0.527778	-0.896858	0.586854	0.997814	0.988724	37	tags=100%, list=50%, signal=51%	P28800
GO:0072359	circulatory system development	2	-0.527778	-0.896858	0.586854	0.997814	0.988724	37	tags=100%, list=50%, signal=51%	P28800
GO:0090303	positive regulation of wound healing	2	-0.527778	-0.896858	0.586854	0.997814	0.988724	37	tags=100%, list=50%, signal=51%	P28800
GO:1903036	positive regulation of response to wounding	2	-0.527778	-0.896858	0.586854	0.997814	0.988724	37	tags=100%, list=50%, signal=51%	P28800
GO:0001816	cytokine production	4	0.463064	0.935509	0.589063	0.997814	0.988724	1	tags=25%, list=1%, signal=26%	Q8SPP7
GO:0001523	retinoid metabolic process	1	-0.69863	-0.934453	0.601253	0.997814	0.988724	24	tags=100%, list=32%, signal=68%
GO:0006720	isoprenoid metabolic process	1	-0.69863	-0.934453	0.601253	0.997814	0.988724	24	tags=100%, list=32%, signal=68%
GO:0006721	terpenoid metabolic process	1	-0.69863	-0.934453	0.601253	0.997814	0.988724	24	tags=100%, list=32%, signal=68%
GO:0009914	hormone transport	1	-0.69863	-0.934453	0.601253	0.997814	0.988724	24	tags=100%, list=32%, signal=68%
GO:0010817	regulation of hormone levels	1	-0.69863	-0.934453	0.601253	0.997814	0.988724	24	tags=100%, list=32%, signal=68%
GO:0016101	diterpenoid metabolic process	1	-0.69863	-0.934453	0.601253	0.997814	0.988724	24	tags=100%, list=32%, signal=68%
GO:0034308	primary alcohol metabolic process	1	-0.69863	-0.934453	0.601253	0.997814	0.988724	24	tags=100%, list=32%, signal=68%
GO:0034754	cellular hormone metabolic process	1	-0.69863	-0.934453	0.601253	0.997814	0.988724	24	tags=100%, list=32%, signal=68%
GO:0042445	hormone metabolic process	1	-0.69863	-0.934453	0.601253	0.997814	0.988724	24	tags=100%, list=32%, signal=68%
GO:0042572	retinol metabolic process	1	-0.69863	-0.934453	0.601253	0.997814	0.988724	24	tags=100%, list=32%, signal=68%
GO:0070327	thyroid hormone transport	1	-0.69863	-0.934453	0.601253	0.997814	0.988724	24	tags=100%, list=32%, signal=68%
GO:0006807	nitrogen compound metabolic process	15	0.290393	0.88774	0.603316	0.997814	0.988724	29	tags=47%, list=39%, signal=36%	Q8SPP7/P52176/Q58CQ9/Q29437/P19035/Q7SIH1/P48616
GO:1901564	organonitrogen compound metabolic process	15	0.290393	0.88774	0.603316	0.997814	0.988724	29	tags=47%, list=39%, signal=36%	Q8SPP7/P52176/Q58CQ9/Q29437/P19035/Q7SIH1/P48616
GO:0033554	cellular response to stress	3	0.498273	0.915603	0.604613	0.997814	0.988724	9	tags=33%, list=12%, signal=31%	P52176
GO:0051716	cellular response to stimulus	13	0.303024	0.887378	0.605782	0.997814	0.988724	9	tags=23%, list=12%, signal=25%	Q2TBU0/Q9TU03/P52176
GO:0048523	negative regulation of cellular process	10	0.330491	0.906575	0.606623	0.997814	0.988724	29	tags=50%, list=39%, signal=35%	Q8SPP7/P52176/P19035/Q7SIH1/P48616
GO:0008283	cell population proliferation	3	0.497964	0.915036	0.607908	0.997814	0.988724	9	tags=33%, list=12%, signal=31%	P52176
GO:0009888	tissue development	3	0.492958	0.905837	0.62603	0.997814	0.988724	39	tags=100%, list=53%, signal=49%	P52176/P48616/P63258
GO:0060429	epithelium development	3	0.492958	0.905837	0.62603	0.997814	0.988724	39	tags=100%, list=53%, signal=49%	P52176/P48616/P63258
GO:0002526	acute inflammatory response	4	0.442857	0.894687	0.645312	0.997814	0.988724	43	tags=100%, list=58%, signal=44%	Q2TBU0/Q2TBI0/Q3T052/P28800
GO:0006953	acute-phase response	4	0.442857	0.894687	0.645312	0.997814	0.988724	43	tags=100%, list=58%, signal=44%	Q2TBU0/Q2TBI0/Q3T052/P28800
GO:0009653	anatomical structure morphogenesis	4	0.442857	0.894687	0.645312	0.997814	0.988724	43	tags=100%, list=58%, signal=44%	P52176/P63258/P15497/P28800
GO:0010628	positive regulation of gene expression	4	0.442857	0.894687	0.645312	0.997814	0.988724	43	tags=100%, list=58%, signal=44%	P48616/Q2TBI0/P63258/P28800
GO:0009966	regulation of signal transduction	6	0.373714	0.864905	0.652555	0.997814	0.988724	9	tags=33%, list=12%, signal=32%	Q9TU03/P52176
GO:0010646	regulation of cell communication	6	0.373714	0.864905	0.652555	0.997814	0.988724	9	tags=33%, list=12%, signal=32%	Q9TU03/P52176
GO:0023051	regulation of signaling	6	0.373714	0.864905	0.652555	0.997814	0.988724	9	tags=33%, list=12%, signal=32%	Q9TU03/P52176
GO:0030029	actin filament-based process	6	0.373523	0.864462	0.652555	0.997814	0.988724	43	tags=83%, list=58%, signal=38%	Q9TU03/P02584/P63258/P15497/P28800
GO:0030036	actin cytoskeleton organization	6	0.373523	0.864462	0.652555	0.997814	0.988724	43	tags=83%, list=58%, signal=38%	Q9TU03/P02584/P63258/P15497/P28800
GO:1902531	regulation of intracellular signal transduction	6	0.373714	0.864905	0.652555	0.997814	0.988724	9	tags=33%, list=12%, signal=32%	Q9TU03/P52176
GO:0050790	regulation of catalytic activity	6	0.371661	0.860152	0.658394	0.997814	0.988724	9	tags=33%, list=12%, signal=32%	Q9TU03/P52176
GO:0051336	regulation of hydrolase activity	6	0.371661	0.860152	0.658394	0.997814	0.988724	9	tags=33%, list=12%, signal=32%	Q9TU03/P52176
GO:0065009	regulation of molecular function	6	0.371661	0.860152	0.658394	0.997814	0.988724	9	tags=33%, list=12%, signal=32%	Q9TU03/P52176
GO:0007264	small GTPase mediated signal transduction	4	0.435654	0.880134	0.660937	0.997814	0.988724	25	tags=50%, list=34%, signal=35%	Q9TU03/P19035
GO:0032496	response to lipopolysaccharide	2	0.555556	0.896681	0.666093	0.997814	0.988724	34	tags=100%, list=46%, signal=56%	P48616/Q2TBI0
GO:0071222	cellular response to lipopolysaccharide	2	0.555556	0.896681	0.666093	0.997814	0.988724	34	tags=100%, list=46%, signal=56%	P48616/Q2TBI0
GO:0071396	cellular response to lipid	2	0.555556	0.896681	0.666093	0.997814	0.988724	34	tags=100%, list=46%, signal=56%	P48616/Q2TBI0
GO:0008064	regulation of actin polymerization or depolymerization	1	-0.657534	-0.879485	0.670146	0.997814	0.988724	27	tags=100%, list=36%, signal=64%
GO:0008154	actin polymerization or depolymerization	1	-0.657534	-0.879485	0.670146	0.997814	0.988724	27	tags=100%, list=36%, signal=64%
GO:0030031	cell projection assembly	1	-0.657534	-0.879485	0.670146	0.997814	0.988724	27	tags=100%, list=36%, signal=64%
GO:0030041	actin filament polymerization	1	-0.657534	-0.879485	0.670146	0.997814	0.988724	27	tags=100%, list=36%, signal=64%
GO:0030832	regulation of actin filament length	1	-0.657534	-0.879485	0.670146	0.997814	0.988724	27	tags=100%, list=36%, signal=64%
GO:0030833	regulation of actin filament polymerization	1	-0.657534	-0.879485	0.670146	0.997814	0.988724	27	tags=100%, list=36%, signal=64%
GO:0030838	positive regulation of actin filament polymerization	1	-0.657534	-0.879485	0.670146	0.997814	0.988724	27	tags=100%, list=36%, signal=64%
GO:0032271	regulation of protein polymerization	1	-0.657534	-0.879485	0.670146	0.997814	0.988724	27	tags=100%, list=36%, signal=64%
GO:0032273	positive regulation of protein polymerization	1	-0.657534	-0.879485	0.670146	0.997814	0.988724	27	tags=100%, list=36%, signal=64%
GO:0032535	regulation of cellular component size	1	-0.657534	-0.879485	0.670146	0.997814	0.988724	27	tags=100%, list=36%, signal=64%
GO:0044782	cilium organization	1	-0.657534	-0.879485	0.670146	0.997814	0.988724	27	tags=100%, list=36%, signal=64%
GO:0045010	actin nucleation	1	-0.657534	-0.879485	0.670146	0.997814	0.988724	27	tags=100%, list=36%, signal=64%
GO:0051258	protein polymerization	1	-0.657534	-0.879485	0.670146	0.997814	0.988724	27	tags=100%, list=36%, signal=64%
GO:0060271	cilium assembly	1	-0.657534	-0.879485	0.670146	0.997814	0.988724	27	tags=100%, list=36%, signal=64%
GO:0070925	organelle assembly	1	-0.657534	-0.879485	0.670146	0.997814	0.988724	27	tags=100%, list=36%, signal=64%
GO:0120031	plasma membrane bounded cell projection assembly	1	-0.657534	-0.879485	0.670146	0.997814	0.988724	27	tags=100%, list=36%, signal=64%
GO:0048519	negative regulation of biological process	11	0.307671	0.857577	0.677291	0.997814	0.988724	29	tags=45%, list=39%, signal=32%	Q8SPP7/P52176/P19035/Q7SIH1/P48616
GO:0010638	positive regulation of organelle organization	4	0.427263	0.863183	0.678125	0.997814	0.988724	9	tags=25%, list=12%, signal=23%	P52176
GO:0034641	cellular nitrogen compound metabolic process	3	0.471638	0.866661	0.678748	0.997814	0.988724	29	tags=67%, list=39%, signal=42%	Q58CQ9/P48616
GO:0015850	organic hydroxy compound transport	4	-0.342857	-0.80944	0.693151	0.997814	0.988724	51	tags=50%, list=69%, signal=16%	Q03247/P26201
GO:0015918	sterol transport	4	-0.342857	-0.80944	0.693151	0.997814	0.988724	51	tags=50%, list=69%, signal=16%	Q03247/P26201
GO:0030301	cholesterol transport	4	-0.342857	-0.80944	0.693151	0.997814	0.988724	51	tags=50%, list=69%, signal=16%	Q03247/P26201
GO:0006631	fatty acid metabolic process	1	0.671233	0.889701	0.694073	0.997814	0.988724	25	tags=100%, list=34%, signal=67%	P19035
GO:0006633	fatty acid biosynthetic process	1	0.671233	0.889701	0.694073	0.997814	0.988724	25	tags=100%, list=34%, signal=67%	P19035
GO:0006638	neutral lipid metabolic process	1	0.671233	0.889701	0.694073	0.997814	0.988724	25	tags=100%, list=34%, signal=67%	P19035
GO:0006639	acylglycerol metabolic process	1	0.671233	0.889701	0.694073	0.997814	0.988724	25	tags=100%, list=34%, signal=67%	P19035
GO:0006641	triglyceride metabolic process	1	0.671233	0.889701	0.694073	0.997814	0.988724	25	tags=100%, list=34%, signal=67%	P19035
GO:0009890	negative regulation of biosynthetic process	1	0.671233	0.889701	0.694073	0.997814	0.988724	25	tags=100%, list=34%, signal=67%	P19035
GO:0010565	regulation of cellular ketone metabolic process	1	0.671233	0.889701	0.694073	0.997814	0.988724	25	tags=100%, list=34%, signal=67%	P19035
GO:0016042	lipid catabolic process	1	0.671233	0.889701	0.694073	0.997814	0.988724	25	tags=100%, list=34%, signal=67%	P19035
GO:0016053	organic acid biosynthetic process	1	0.671233	0.889701	0.694073	0.997814	0.988724	25	tags=100%, list=34%, signal=67%	P19035
GO:0019216	regulation of lipid metabolic process	1	0.671233	0.889701	0.694073	0.997814	0.988724	25	tags=100%, list=34%, signal=67%	P19035
GO:0019217	regulation of fatty acid metabolic process	1	0.671233	0.889701	0.694073	0.997814	0.988724	25	tags=100%, list=34%, signal=67%	P19035
GO:0019433	triglyceride catabolic process	1	0.671233	0.889701	0.694073	0.997814	0.988724	25	tags=100%, list=34%, signal=67%	P19035
GO:0030100	regulation of endocytosis	1	0.671233	0.889701	0.694073	0.997814	0.988724	25	tags=100%, list=34%, signal=67%	P19035
GO:0031327	negative regulation of cellular biosynthetic process	1	0.671233	0.889701	0.694073	0.997814	0.988724	25	tags=100%, list=34%, signal=67%	P19035
GO:0032369	negative regulation of lipid transport	1	0.671233	0.889701	0.694073	0.997814	0.988724	25	tags=100%, list=34%, signal=67%	P19035
GO:0032372	negative regulation of sterol transport	1	0.671233	0.889701	0.694073	0.997814	0.988724	25	tags=100%, list=34%, signal=67%	P19035
GO:0032375	negative regulation of cholesterol transport	1	0.671233	0.889701	0.694073	0.997814	0.988724	25	tags=100%, list=34%, signal=67%	P19035
GO:0042180	cellular ketone metabolic process	1	0.671233	0.889701	0.694073	0.997814	0.988724	25	tags=100%, list=34%, signal=67%	P19035
GO:0042304	regulation of fatty acid biosynthetic process	1	0.671233	0.889701	0.694073	0.997814	0.988724	25	tags=100%, list=34%, signal=67%	P19035
GO:0044242	cellular lipid catabolic process	1	0.671233	0.889701	0.694073	0.997814	0.988724	25	tags=100%, list=34%, signal=67%	P19035
GO:0044283	small molecule biosynthetic process	1	0.671233	0.889701	0.694073	0.997814	0.988724	25	tags=100%, list=34%, signal=67%	P19035
GO:0045717	negative regulation of fatty acid biosynthetic process	1	0.671233	0.889701	0.694073	0.997814	0.988724	25	tags=100%, list=34%, signal=67%	P19035
GO:0045806	negative regulation of endocytosis	1	0.671233	0.889701	0.694073	0.997814	0.988724	25	tags=100%, list=34%, signal=67%	P19035
GO:0045833	negative regulation of lipid metabolic process	1	0.671233	0.889701	0.694073	0.997814	0.988724	25	tags=100%, list=34%, signal=67%	P19035
GO:0045922	negative regulation of fatty acid metabolic process	1	0.671233	0.889701	0.694073	0.997814	0.988724	25	tags=100%, list=34%, signal=67%	P19035
GO:0046394	carboxylic acid biosynthetic process	1	0.671233	0.889701	0.694073	0.997814	0.988724	25	tags=100%, list=34%, signal=67%	P19035
GO:0046461	neutral lipid catabolic process	1	0.671233	0.889701	0.694073	0.997814	0.988724	25	tags=100%, list=34%, signal=67%	P19035
GO:0046464	acylglycerol catabolic process	1	0.671233	0.889701	0.694073	0.997814	0.988724	25	tags=100%, list=34%, signal=67%	P19035
GO:0046503	glycerolipid catabolic process	1	0.671233	0.889701	0.694073	0.997814	0.988724	25	tags=100%, list=34%, signal=67%	P19035
GO:0046890	regulation of lipid biosynthetic process	1	0.671233	0.889701	0.694073	0.997814	0.988724	25	tags=100%, list=34%, signal=67%	P19035
GO:0048259	regulation of receptor-mediated endocytosis	1	0.671233	0.889701	0.694073	0.997814	0.988724	25	tags=100%, list=34%, signal=67%	P19035
GO:0048261	negative regulation of receptor-mediated endocytosis	1	0.671233	0.889701	0.694073	0.997814	0.988724	25	tags=100%, list=34%, signal=67%	P19035
GO:0051055	negative regulation of lipid biosynthetic process	1	0.671233	0.889701	0.694073	0.997814	0.988724	25	tags=100%, list=34%, signal=67%	P19035
GO:0060620	regulation of cholesterol import	1	0.671233	0.889701	0.694073	0.997814	0.988724	25	tags=100%, list=34%, signal=67%	P19035
GO:0060621	negative regulation of cholesterol import	1	0.671233	0.889701	0.694073	0.997814	0.988724	25	tags=100%, list=34%, signal=67%	P19035
GO:0062012	regulation of small molecule metabolic process	1	0.671233	0.889701	0.694073	0.997814	0.988724	25	tags=100%, list=34%, signal=67%	P19035
GO:0062014	negative regulation of small molecule metabolic process	1	0.671233	0.889701	0.694073	0.997814	0.988724	25	tags=100%, list=34%, signal=67%	P19035
GO:0072330	monocarboxylic acid biosynthetic process	1	0.671233	0.889701	0.694073	0.997814	0.988724	25	tags=100%, list=34%, signal=67%	P19035
GO:1905953	negative regulation of lipid localization	1	0.671233	0.889701	0.694073	0.997814	0.988724	25	tags=100%, list=34%, signal=67%	P19035
GO:2000909	regulation of sterol import	1	0.671233	0.889701	0.694073	0.997814	0.988724	25	tags=100%, list=34%, signal=67%	P19035
GO:2000910	negative regulation of sterol import	1	0.671233	0.889701	0.694073	0.997814	0.988724	25	tags=100%, list=34%, signal=67%	P19035
GO:0006928	movement of cell or subcellular component	3	0.464789	0.854075	0.700165	0.997814	0.988724	41	tags=100%, list=55%, signal=46%	P52176/P63258/P15497
GO:0009790	embryo development	3	0.464789	0.854075	0.700165	0.997814	0.988724	41	tags=100%, list=55%, signal=46%	P52176/P48616/P15497
GO:0016477	cell migration	3	0.464789	0.854075	0.700165	0.997814	0.988724	41	tags=100%, list=55%, signal=46%	P52176/P63258/P15497
GO:0040011	locomotion	3	0.464789	0.854075	0.700165	0.997814	0.988724	41	tags=100%, list=55%, signal=46%	P52176/P63258/P15497
GO:0048870	cell motility	3	0.464789	0.854075	0.700165	0.997814	0.988724	41	tags=100%, list=55%, signal=46%	P52176/P63258/P15497
GO:0051674	localization of cell	3	0.464789	0.854075	0.700165	0.997814	0.988724	41	tags=100%, list=55%, signal=46%	P52176/P63258/P15497
GO:0071310	cellular response to organic substance	3	0.464789	0.854075	0.700165	0.997814	0.988724	41	tags=100%, list=55%, signal=46%	P48616/Q2TBI0/P15497
GO:0035556	intracellular signal transduction	7	0.347668	0.83978	0.703808	0.997814	0.988724	9	tags=29%, list=12%, signal=28%	Q9TU03/P52176
GO:0010605	negative regulation of macromolecule metabolic process	8	0.333791	0.841703	0.705479	0.997814	0.988724	9	tags=25%, list=12%, signal=25%	Q8SPP7/P52176
GO:0009889	regulation of biosynthetic process	3	0.457854	0.841331	0.716639	0.997814	0.988724	29	tags=67%, list=39%, signal=42%	P19035/P48616
GO:0031326	regulation of cellular biosynthetic process	3	0.457854	0.841331	0.716639	0.997814	0.988724	29	tags=67%, list=39%, signal=42%	P19035/P48616
GO:0002237	response to molecule of bacterial origin	3	-0.394366	-0.797211	0.726131	0.997814	0.988724	47	tags=100%, list=64%, signal=38%	Q2TBI0/P26201
GO:0033993	response to lipid	3	-0.394366	-0.797211	0.726131	0.997814	0.988724	47	tags=100%, list=64%, signal=38%	Q2TBI0/P26201
GO:0071216	cellular response to biotic stimulus	3	-0.394366	-0.797211	0.726131	0.997814	0.988724	47	tags=100%, list=64%, signal=38%	Q2TBI0/P26201
GO:0071219	cellular response to molecule of bacterial origin	3	-0.394366	-0.797211	0.726131	0.997814	0.988724	47	tags=100%, list=64%, signal=38%	Q2TBI0/P26201
GO:1901566	organonitrogen compound biosynthetic process	3	-0.394366	-0.797211	0.726131	0.997814	0.988724	47	tags=100%, list=64%, signal=38%	P15497/Q03247
GO:0009719	response to endogenous stimulus	2	-0.475128	-0.807389	0.7277	0.997814	0.988724	6	tags=50%, list=8%, signal=47%	P26201
GO:0042221	response to chemical	7	0.339075	0.819025	0.733427	0.997814	0.988724	9	tags=29%, list=12%, signal=28%	Q2TBU0/P52176
GO:0019538	protein metabolic process	12	-0.222026	-0.80164	0.751004	0.997814	0.988724	51	tags=92%, list=69%, signal=34%	P19035/Q7SIH1/P48616/Q3T052/P15497/P28800/P81187/Q03247/Q3MHX6/P13696/P26201
GO:0044248	cellular catabolic process	3	0.438195	0.805206	0.76112	0.997814	0.988724	29	tags=67%, list=39%, signal=42%	P19035/P48616
GO:0010467	gene expression	6	0.341393	0.790103	0.762044	0.997814	0.988724	1	tags=17%, list=1%, signal=18%	Q8SPP7
GO:0001819	positive regulation of cytokine production	2	-0.458333	-0.77885	0.7723	0.997814	0.988724	42	tags=100%, list=57%, signal=44%	P28800
GO:0050794	regulation of cellular process	17	0.238139	0.750102	0.776797	0.997814	0.988724	9	tags=18%, list=12%, signal=20%	Q8SPP7/Q9TU03/P52176
GO:0032956	regulation of actin cytoskeleton organization	5	0.362319	0.784521	0.777778	0.997814	0.988724	49	tags=100%, list=66%, signal=36%	Q9TU03/P63258/P15497/P28800/Q3SX14
GO:0032970	regulation of actin filament-based process	5	0.362319	0.784521	0.777778	0.997814	0.988724	49	tags=100%, list=66%, signal=36%	Q9TU03/P63258/P15497/P28800/Q3SX14
GO:0051493	regulation of cytoskeleton organization	5	0.362319	0.784521	0.777778	0.997814	0.988724	49	tags=100%, list=66%, signal=36%	Q9TU03/P63258/P15497/P28800/Q3SX14
GO:0001654	eye development	1	0.616438	0.817072	0.778203	0.997814	0.988724	29	tags=100%, list=39%, signal=62%	P48616
GO:0001701	in utero embryonic development	1	0.616438	0.817072	0.778203	0.997814	0.988724	29	tags=100%, list=39%, signal=62%	P48616
GO:0002064	epithelial cell development	1	0.616438	0.817072	0.778203	0.997814	0.988724	29	tags=100%, list=39%, signal=62%	P48616
GO:0002088	lens development in camera-type eye	1	0.616438	0.817072	0.778203	0.997814	0.988724	29	tags=100%, list=39%, signal=62%	P48616
GO:0006401	RNA catabolic process	1	0.616438	0.817072	0.778203	0.997814	0.988724	29	tags=100%, list=39%, signal=62%	P48616
GO:0006402	mRNA catabolic process	1	0.616438	0.817072	0.778203	0.997814	0.988724	29	tags=100%, list=39%, signal=62%	P48616
GO:0006412	translation	1	0.616438	0.817072	0.778203	0.997814	0.988724	29	tags=100%, list=39%, signal=62%	P48616
GO:0006417	regulation of translation	1	0.616438	0.817072	0.778203	0.997814	0.988724	29	tags=100%, list=39%, signal=62%	P48616
GO:0006518	peptide metabolic process	1	0.616438	0.817072	0.778203	0.997814	0.988724	29	tags=100%, list=39%, signal=62%	P48616
GO:0006801	superoxide metabolic process	1	0.616438	0.817072	0.778203	0.997814	0.988724	29	tags=100%, list=39%, signal=62%	P48616
GO:0007178	transmembrane receptor protein serine/threonine kinase signaling pathway	1	0.616438	0.817072	0.778203	0.997814	0.988724	29	tags=100%, list=39%, signal=62%	P48616
GO:0007399	nervous system development	1	0.616438	0.817072	0.778203	0.997814	0.988724	29	tags=100%, list=39%, signal=62%	P48616
GO:0007417	central nervous system development	1	0.616438	0.817072	0.778203	0.997814	0.988724	29	tags=100%, list=39%, signal=62%	P48616
GO:0007423	sensory organ development	1	0.616438	0.817072	0.778203	0.997814	0.988724	29	tags=100%, list=39%, signal=62%	P48616
GO:0009792	embryo development ending in birth or egg hatching	1	0.616438	0.817072	0.778203	0.997814	0.988724	29	tags=100%, list=39%, signal=62%	P48616
GO:0009894	regulation of catabolic process	1	0.616438	0.817072	0.778203	0.997814	0.988724	29	tags=100%, list=39%, signal=62%	P48616
GO:0010001	glial cell differentiation	1	0.616438	0.817072	0.778203	0.997814	0.988724	29	tags=100%, list=39%, signal=62%	P48616
GO:0010608	posttranscriptional regulation of gene expression	1	0.616438	0.817072	0.778203	0.997814	0.988724	29	tags=100%, list=39%, signal=62%	P48616
GO:0010721	negative regulation of cell development	1	0.616438	0.817072	0.778203	0.997814	0.988724	29	tags=100%, list=39%, signal=62%	P48616
GO:0010975	regulation of neuron projection development	1	0.616438	0.817072	0.778203	0.997814	0.988724	29	tags=100%, list=39%, signal=62%	P48616
GO:0010977	negative regulation of neuron projection development	1	0.616438	0.817072	0.778203	0.997814	0.988724	29	tags=100%, list=39%, signal=62%	P48616
GO:0014002	astrocyte development	1	0.616438	0.817072	0.778203	0.997814	0.988724	29	tags=100%, list=39%, signal=62%	P48616
GO:0016071	mRNA metabolic process	1	0.616438	0.817072	0.778203	0.997814	0.988724	29	tags=100%, list=39%, signal=62%	P48616
GO:0019439	aromatic compound catabolic process	1	0.616438	0.817072	0.778203	0.997814	0.988724	29	tags=100%, list=39%, signal=62%	P48616
GO:0021782	glial cell development	1	0.616438	0.817072	0.778203	0.997814	0.988724	29	tags=100%, list=39%, signal=62%	P48616
GO:0022008	neurogenesis	1	0.616438	0.817072	0.778203	0.997814	0.988724	29	tags=100%, list=39%, signal=62%	P48616
GO:0030182	neuron differentiation	1	0.616438	0.817072	0.778203	0.997814	0.988724	29	tags=100%, list=39%, signal=62%	P48616
GO:0031175	neuron projection development	1	0.616438	0.817072	0.778203	0.997814	0.988724	29	tags=100%, list=39%, signal=62%	P48616
GO:0031329	regulation of cellular catabolic process	1	0.616438	0.817072	0.778203	0.997814	0.988724	29	tags=100%, list=39%, signal=62%	P48616
GO:0031344	regulation of cell projection organization	1	0.616438	0.817072	0.778203	0.997814	0.988724	29	tags=100%, list=39%, signal=62%	P48616
GO:0031345	negative regulation of cell projection organization	1	0.616438	0.817072	0.778203	0.997814	0.988724	29	tags=100%, list=39%, signal=62%	P48616
GO:0032495	response to muramyl dipeptide	1	0.616438	0.817072	0.778203	0.997814	0.988724	29	tags=100%, list=39%, signal=62%	P48616
GO:0032928	regulation of superoxide anion generation	1	0.616438	0.817072	0.778203	0.997814	0.988724	29	tags=100%, list=39%, signal=62%	P48616
GO:0032930	positive regulation of superoxide anion generation	1	0.616438	0.817072	0.778203	0.997814	0.988724	29	tags=100%, list=39%, signal=62%	P48616
GO:0034248	regulation of cellular amide metabolic process	1	0.616438	0.817072	0.778203	0.997814	0.988724	29	tags=100%, list=39%, signal=62%	P48616
GO:0034250	positive regulation of cellular amide metabolic process	1	0.616438	0.817072	0.778203	0.997814	0.988724	29	tags=100%, list=39%, signal=62%	P48616
GO:0034341	response to interferon-gamma	1	0.616438	0.817072	0.778203	0.997814	0.988724	29	tags=100%, list=39%, signal=62%	P48616
GO:0034655	nucleobase-containing compound catabolic process	1	0.616438	0.817072	0.778203	0.997814	0.988724	29	tags=100%, list=39%, signal=62%	P48616
GO:0042063	gliogenesis	1	0.616438	0.817072	0.778203	0.997814	0.988724	29	tags=100%, list=39%, signal=62%	P48616
GO:0042554	superoxide anion generation	1	0.616438	0.817072	0.778203	0.997814	0.988724	29	tags=100%, list=39%, signal=62%	P48616
GO:0043009	chordate embryonic development	1	0.616438	0.817072	0.778203	0.997814	0.988724	29	tags=100%, list=39%, signal=62%	P48616
GO:0043010	camera-type eye development	1	0.616438	0.817072	0.778203	0.997814	0.988724	29	tags=100%, list=39%, signal=62%	P48616
GO:0043043	peptide biosynthetic process	1	0.616438	0.817072	0.778203	0.997814	0.988724	29	tags=100%, list=39%, signal=62%	P48616
GO:0043487	regulation of RNA stability	1	0.616438	0.817072	0.778203	0.997814	0.988724	29	tags=100%, list=39%, signal=62%	P48616
GO:0043488	regulation of mRNA stability	1	0.616438	0.817072	0.778203	0.997814	0.988724	29	tags=100%, list=39%, signal=62%	P48616
GO:0043604	amide biosynthetic process	1	0.616438	0.817072	0.778203	0.997814	0.988724	29	tags=100%, list=39%, signal=62%	P48616
GO:0044270	cellular nitrogen compound catabolic process	1	0.616438	0.817072	0.778203	0.997814	0.988724	29	tags=100%, list=39%, signal=62%	P48616
GO:0045103	intermediate filament-based process	1	0.616438	0.817072	0.778203	0.997814	0.988724	29	tags=100%, list=39%, signal=62%	P48616
GO:0045104	intermediate filament cytoskeleton organization	1	0.616438	0.817072	0.778203	0.997814	0.988724	29	tags=100%, list=39%, signal=62%	P48616
GO:0045109	intermediate filament organization	1	0.616438	0.817072	0.778203	0.997814	0.988724	29	tags=100%, list=39%, signal=62%	P48616
GO:0045664	regulation of neuron differentiation	1	0.616438	0.817072	0.778203	0.997814	0.988724	29	tags=100%, list=39%, signal=62%	P48616
GO:0045665	negative regulation of neuron differentiation	1	0.616438	0.817072	0.778203	0.997814	0.988724	29	tags=100%, list=39%, signal=62%	P48616
GO:0045727	positive regulation of translation	1	0.616438	0.817072	0.778203	0.997814	0.988724	29	tags=100%, list=39%, signal=62%	P48616
GO:0046700	heterocycle catabolic process	1	0.616438	0.817072	0.778203	0.997814	0.988724	29	tags=100%, list=39%, signal=62%	P48616
GO:0048666	neuron development	1	0.616438	0.817072	0.778203	0.997814	0.988724	29	tags=100%, list=39%, signal=62%	P48616
GO:0048699	generation of neurons	1	0.616438	0.817072	0.778203	0.997814	0.988724	29	tags=100%, list=39%, signal=62%	P48616
GO:0048708	astrocyte differentiation	1	0.616438	0.817072	0.778203	0.997814	0.988724	29	tags=100%, list=39%, signal=62%	P48616
GO:0048880	sensory system development	1	0.616438	0.817072	0.778203	0.997814	0.988724	29	tags=100%, list=39%, signal=62%	P48616
GO:0050767	regulation of neurogenesis	1	0.616438	0.817072	0.778203	0.997814	0.988724	29	tags=100%, list=39%, signal=62%	P48616
GO:0050768	negative regulation of neurogenesis	1	0.616438	0.817072	0.778203	0.997814	0.988724	29	tags=100%, list=39%, signal=62%	P48616
GO:0051960	regulation of nervous system development	1	0.616438	0.817072	0.778203	0.997814	0.988724	29	tags=100%, list=39%, signal=62%	P48616
GO:0051961	negative regulation of nervous system development	1	0.616438	0.817072	0.778203	0.997814	0.988724	29	tags=100%, list=39%, signal=62%	P48616
GO:0060020	Bergmann glial cell differentiation	1	0.616438	0.817072	0.778203	0.997814	0.988724	29	tags=100%, list=39%, signal=62%	P48616
GO:0060395	SMAD protein signal transduction	1	0.616438	0.817072	0.778203	0.997814	0.988724	29	tags=100%, list=39%, signal=62%	P48616
GO:0061013	regulation of mRNA catabolic process	1	0.616438	0.817072	0.778203	0.997814	0.988724	29	tags=100%, list=39%, signal=62%	P48616
GO:0070306	lens fiber cell differentiation	1	0.616438	0.817072	0.778203	0.997814	0.988724	29	tags=100%, list=39%, signal=62%	P48616
GO:0070307	lens fiber cell development	1	0.616438	0.817072	0.778203	0.997814	0.988724	29	tags=100%, list=39%, signal=62%	P48616
GO:0071225	cellular response to muramyl dipeptide	1	0.616438	0.817072	0.778203	0.997814	0.988724	29	tags=100%, list=39%, signal=62%	P48616
GO:0071346	cellular response to interferon-gamma	1	0.616438	0.817072	0.778203	0.997814	0.988724	29	tags=100%, list=39%, signal=62%	P48616
GO:0071417	cellular response to organonitrogen compound	1	0.616438	0.817072	0.778203	0.997814	0.988724	29	tags=100%, list=39%, signal=62%	P48616
GO:0071495	cellular response to endogenous stimulus	1	0.616438	0.817072	0.778203	0.997814	0.988724	29	tags=100%, list=39%, signal=62%	P48616
GO:0072593	reactive oxygen species metabolic process	1	0.616438	0.817072	0.778203	0.997814	0.988724	29	tags=100%, list=39%, signal=62%	P48616
GO:0090322	regulation of superoxide metabolic process	1	0.616438	0.817072	0.778203	0.997814	0.988724	29	tags=100%, list=39%, signal=62%	P48616
GO:0120035	regulation of plasma membrane bounded cell projection organization	1	0.616438	0.817072	0.778203	0.997814	0.988724	29	tags=100%, list=39%, signal=62%	P48616
GO:0150063	visual system development	1	0.616438	0.817072	0.778203	0.997814	0.988724	29	tags=100%, list=39%, signal=62%	P48616
GO:1901361	organic cyclic compound catabolic process	1	0.616438	0.817072	0.778203	0.997814	0.988724	29	tags=100%, list=39%, signal=62%	P48616
GO:1901653	cellular response to peptide	1	0.616438	0.817072	0.778203	0.997814	0.988724	29	tags=100%, list=39%, signal=62%	P48616
GO:1901699	cellular response to nitrogen compound	1	0.616438	0.817072	0.778203	0.997814	0.988724	29	tags=100%, list=39%, signal=62%	P48616
GO:1903311	regulation of mRNA metabolic process	1	0.616438	0.817072	0.778203	0.997814	0.988724	29	tags=100%, list=39%, signal=62%	P48616
GO:2000377	regulation of reactive oxygen species metabolic process	1	0.616438	0.817072	0.778203	0.997814	0.988724	29	tags=100%, list=39%, signal=62%	P48616
GO:2000379	positive regulation of reactive oxygen species metabolic process	1	0.616438	0.817072	0.778203	0.997814	0.988724	29	tags=100%, list=39%, signal=62%	P48616
GO:1901360	organic cyclic compound metabolic process	3	0.43662	0.802313	0.779242	0.997814	0.988724	43	tags=100%, list=58%, signal=44%	P48616/P15497/P28800
GO:0016043	cellular component organization	11	0.272135	0.758528	0.780876	0.997814	0.988724	29	tags=45%, list=39%, signal=32%	Q9TU03/P52176/P19035/P02584/P48616
GO:0071840	cellular component organization or biogenesis	11	0.272135	0.758528	0.780876	0.997814	0.988724	29	tags=45%, list=39%, signal=32%	Q9TU03/P52176/P19035/P02584/P48616
GO:0006897	endocytosis	2	-0.452851	-0.769534	0.78169	0.997814	0.988724	6	tags=50%, list=8%, signal=47%	P26201
GO:0006898	receptor-mediated endocytosis	2	-0.452851	-0.769534	0.78169	0.997814	0.988724	6	tags=50%, list=8%, signal=47%	P26201
GO:0019222	regulation of metabolic process	13	0.261223	0.764966	0.781866	0.997814	0.988724	43	tags=77%, list=58%, signal=39%	Q8SPP7/P52176/P19035/Q7SIH1/P48616/Q2TBI0/Q3T052/P63258/P15497/P28800
GO:0032501	multicellular organismal process	11	0.269889	0.752268	0.784861	0.997814	0.988724	43	tags=73%, list=58%, signal=36%	Q8SPP7/P52176/P19035/P48616/Q2TBI0/P63258/P15497/P28800
GO:0006811	ion transport	6	0.329166	0.761804	0.80146	0.997814	0.988724	25	tags=50%, list=34%, signal=36%	P52176/Q3SZV7/P19035
GO:0006820	anion transport	3	-0.364093	-0.736014	0.821608	0.997814	0.988724	6	tags=67%, list=8%, signal=64%	P15497/P26201
GO:0015711	organic anion transport	3	-0.364093	-0.736014	0.821608	0.997814	0.988724	6	tags=67%, list=8%, signal=64%	P15497/P26201
GO:0016192	vesicle-mediated transport	3	-0.364093	-0.736014	0.821608	0.997814	0.988724	6	tags=67%, list=8%, signal=64%	P15497/P26201
GO:0035376	sterol import	3	-0.364093	-0.736014	0.821608	0.997814	0.988724	6	tags=67%, list=8%, signal=64%	P15497/P26201
GO:0070508	cholesterol import	3	-0.364093	-0.736014	0.821608	0.997814	0.988724	6	tags=67%, list=8%, signal=64%	P15497/P26201
GO:0050789	regulation of biological process	21	0.213629	0.707169	0.82503	0.997814	0.988724	43	tags=62%, list=58%, signal=36%	Q8SPP7/Q9TU03/P52176/Q28085/P19035/Q7SIH1/P48616/O77482/Q2TBI0/Q3T052/P63258/P15497/P28800
GO:0006873	cellular ion homeostasis	3	-0.35754	-0.722766	0.829146	0.997814	0.988724	6	tags=67%, list=8%, signal=64%	Q29443/P26201
GO:0006875	cellular metal ion homeostasis	3	-0.35754	-0.722766	0.829146	0.997814	0.988724	6	tags=67%, list=8%, signal=64%	Q29443/P26201
GO:0019725	cellular homeostasis	3	-0.35754	-0.722766	0.829146	0.997814	0.988724	6	tags=67%, list=8%, signal=64%	Q29443/P26201
GO:0030003	cellular cation homeostasis	3	-0.35754	-0.722766	0.829146	0.997814	0.988724	6	tags=67%, list=8%, signal=64%	Q29443/P26201
GO:0055065	metal ion homeostasis	3	-0.35754	-0.722766	0.829146	0.997814	0.988724	6	tags=67%, list=8%, signal=64%	Q29443/P26201
GO:0055080	cation homeostasis	3	-0.35754	-0.722766	0.829146	0.997814	0.988724	6	tags=67%, list=8%, signal=64%	Q29443/P26201
GO:0055082	cellular chemical homeostasis	3	-0.35754	-0.722766	0.829146	0.997814	0.988724	6	tags=67%, list=8%, signal=64%	Q29443/P26201
GO:0098771	inorganic ion homeostasis	3	-0.35754	-0.722766	0.829146	0.997814	0.988724	6	tags=67%, list=8%, signal=64%	Q29443/P26201
GO:0051240	positive regulation of multicellular organismal process	4	0.355921	0.719053	0.83125	0.997814	0.988724	9	tags=25%, list=12%, signal=23%	P52176
GO:0051129	negative regulation of cellular component organization	4	0.355357	0.717914	0.832812	0.997814	0.988724	41	tags=75%, list=55%, signal=35%	P19035/P48616/P15497
GO:0007154	cell communication	10	0.25655	0.703747	0.839735	0.997814	0.988724	33	tags=50%, list=45%, signal=32%	Q9TU03/P52176/P19035/P48616/O77482
GO:0007165	signal transduction	10	0.25655	0.703747	0.839735	0.997814	0.988724	33	tags=50%, list=45%, signal=32%	Q9TU03/P52176/P19035/P48616/O77482
GO:0023052	signaling	10	0.25655	0.703747	0.839735	0.997814	0.988724	33	tags=50%, list=45%, signal=32%	Q9TU03/P52176/P19035/P48616/O77482
GO:0001990	regulation of systemic arterial blood pressure by hormone	1	-0.575342	-0.769549	0.841336	0.997814	0.988724	33	tags=100%, list=45%, signal=56%
GO:0002034	regulation of blood vessel diameter by renin-angiotensin	1	-0.575342	-0.769549	0.841336	0.997814	0.988724	33	tags=100%, list=45%, signal=56%
GO:0003013	circulatory system process	1	-0.575342	-0.769549	0.841336	0.997814	0.988724	33	tags=100%, list=45%, signal=56%
GO:0003014	renal system process	1	-0.575342	-0.769549	0.841336	0.997814	0.988724	33	tags=100%, list=45%, signal=56%
GO:0003018	vascular process in circulatory system	1	-0.575342	-0.769549	0.841336	0.997814	0.988724	33	tags=100%, list=45%, signal=56%
GO:0003044	regulation of systemic arterial blood pressure mediated by a chemical signal	1	-0.575342	-0.769549	0.841336	0.997814	0.988724	33	tags=100%, list=45%, signal=56%
GO:0003071	renal system process involved in regulation of systemic arterial blood pressure	1	-0.575342	-0.769549	0.841336	0.997814	0.988724	33	tags=100%, list=45%, signal=56%
GO:0003072	renal control of peripheral vascular resistance involved in regulation of systemic arterial blood pressure	1	-0.575342	-0.769549	0.841336	0.997814	0.988724	33	tags=100%, list=45%, signal=56%
GO:0003073	regulation of systemic arterial blood pressure	1	-0.575342	-0.769549	0.841336	0.997814	0.988724	33	tags=100%, list=45%, signal=56%
GO:0003081	regulation of systemic arterial blood pressure by renin-angiotensin	1	-0.575342	-0.769549	0.841336	0.997814	0.988724	33	tags=100%, list=45%, signal=56%
GO:0006351	transcription, DNA-templated	1	-0.575342	-0.769549	0.841336	0.997814	0.988724	33	tags=100%, list=45%, signal=56%
GO:0006355	regulation of transcription, DNA-templated	1	-0.575342	-0.769549	0.841336	0.997814	0.988724	33	tags=100%, list=45%, signal=56%
GO:0006357	regulation of transcription by RNA polymerase II	1	-0.575342	-0.769549	0.841336	0.997814	0.988724	33	tags=100%, list=45%, signal=56%
GO:0006366	transcription by RNA polymerase II	1	-0.575342	-0.769549	0.841336	0.997814	0.988724	33	tags=100%, list=45%, signal=56%
GO:0007254	JNK cascade	1	-0.575342	-0.769549	0.841336	0.997814	0.988724	33	tags=100%, list=45%, signal=56%
GO:0008015	blood circulation	1	-0.575342	-0.769549	0.841336	0.997814	0.988724	33	tags=100%, list=45%, signal=56%
GO:0008217	regulation of blood pressure	1	-0.575342	-0.769549	0.841336	0.997814	0.988724	33	tags=100%, list=45%, signal=56%
GO:0010755	regulation of plasminogen activation	1	-0.575342	-0.769549	0.841336	0.997814	0.988724	33	tags=100%, list=45%, signal=56%
GO:0010757	negative regulation of plasminogen activation	1	-0.575342	-0.769549	0.841336	0.997814	0.988724	33	tags=100%, list=45%, signal=56%
GO:0010955	negative regulation of protein processing	1	-0.575342	-0.769549	0.841336	0.997814	0.988724	33	tags=100%, list=45%, signal=56%
GO:0016485	protein processing	1	-0.575342	-0.769549	0.841336	0.997814	0.988724	33	tags=100%, list=45%, signal=56%
GO:0018130	heterocycle biosynthetic process	1	-0.575342	-0.769549	0.841336	0.997814	0.988724	33	tags=100%, list=45%, signal=56%
GO:0019438	aromatic compound biosynthetic process	1	-0.575342	-0.769549	0.841336	0.997814	0.988724	33	tags=100%, list=45%, signal=56%
GO:0030194	positive regulation of blood coagulation	1	-0.575342	-0.769549	0.841336	0.997814	0.988724	33	tags=100%, list=45%, signal=56%
GO:0030198	extracellular matrix organization	1	-0.575342	-0.769549	0.841336	0.997814	0.988724	33	tags=100%, list=45%, signal=56%
GO:0030199	collagen fibril organization	1	-0.575342	-0.769549	0.841336	0.997814	0.988724	33	tags=100%, list=45%, signal=56%
GO:0031098	stress-activated protein kinase signaling cascade	1	-0.575342	-0.769549	0.841336	0.997814	0.988724	33	tags=100%, list=45%, signal=56%
GO:0031638	zymogen activation	1	-0.575342	-0.769549	0.841336	0.997814	0.988724	33	tags=100%, list=45%, signal=56%
GO:0031639	plasminogen activation	1	-0.575342	-0.769549	0.841336	0.997814	0.988724	33	tags=100%, list=45%, signal=56%
GO:0032103	positive regulation of response to external stimulus	1	-0.575342	-0.769549	0.841336	0.997814	0.988724	33	tags=100%, list=45%, signal=56%
GO:0032774	RNA biosynthetic process	1	-0.575342	-0.769549	0.841336	0.997814	0.988724	33	tags=100%, list=45%, signal=56%
GO:0032872	regulation of stress-activated MAPK cascade	1	-0.575342	-0.769549	0.841336	0.997814	0.988724	33	tags=100%, list=45%, signal=56%
GO:0032874	positive regulation of stress-activated MAPK cascade	1	-0.575342	-0.769549	0.841336	0.997814	0.988724	33	tags=100%, list=45%, signal=56%
GO:0034654	nucleobase-containing compound biosynthetic process	1	-0.575342	-0.769549	0.841336	0.997814	0.988724	33	tags=100%, list=45%, signal=56%
GO:0035150	regulation of tube size	1	-0.575342	-0.769549	0.841336	0.997814	0.988724	33	tags=100%, list=45%, signal=56%
GO:0035296	regulation of tube diameter	1	-0.575342	-0.769549	0.841336	0.997814	0.988724	33	tags=100%, list=45%, signal=56%
GO:0043062	extracellular structure organization	1	-0.575342	-0.769549	0.841336	0.997814	0.988724	33	tags=100%, list=45%, signal=56%
GO:0045893	positive regulation of transcription, DNA-templated	1	-0.575342	-0.769549	0.841336	0.997814	0.988724	33	tags=100%, list=45%, signal=56%
GO:0045935	positive regulation of nucleobase-containing compound metabolic process	1	-0.575342	-0.769549	0.841336	0.997814	0.988724	33	tags=100%, list=45%, signal=56%
GO:0045944	positive regulation of transcription by RNA polymerase II	1	-0.575342	-0.769549	0.841336	0.997814	0.988724	33	tags=100%, list=45%, signal=56%
GO:0046328	regulation of JNK cascade	1	-0.575342	-0.769549	0.841336	0.997814	0.988724	33	tags=100%, list=45%, signal=56%
GO:0046330	positive regulation of JNK cascade	1	-0.575342	-0.769549	0.841336	0.997814	0.988724	33	tags=100%, list=45%, signal=56%
GO:0050820	positive regulation of coagulation	1	-0.575342	-0.769549	0.841336	0.997814	0.988724	33	tags=100%, list=45%, signal=56%
GO:0050886	endocrine process	1	-0.575342	-0.769549	0.841336	0.997814	0.988724	33	tags=100%, list=45%, signal=56%
GO:0051254	positive regulation of RNA metabolic process	1	-0.575342	-0.769549	0.841336	0.997814	0.988724	33	tags=100%, list=45%, signal=56%
GO:0051403	stress-activated MAPK cascade	1	-0.575342	-0.769549	0.841336	0.997814	0.988724	33	tags=100%, list=45%, signal=56%
GO:0051604	protein maturation	1	-0.575342	-0.769549	0.841336	0.997814	0.988724	33	tags=100%, list=45%, signal=56%
GO:0051917	regulation of fibrinolysis	1	-0.575342	-0.769549	0.841336	0.997814	0.988724	33	tags=100%, list=45%, signal=56%
GO:0051918	negative regulation of fibrinolysis	1	-0.575342	-0.769549	0.841336	0.997814	0.988724	33	tags=100%, list=45%, signal=56%
GO:0070302	regulation of stress-activated protein kinase signaling cascade	1	-0.575342	-0.769549	0.841336	0.997814	0.988724	33	tags=100%, list=45%, signal=56%
GO:0070304	positive regulation of stress-activated protein kinase signaling cascade	1	-0.575342	-0.769549	0.841336	0.997814	0.988724	33	tags=100%, list=45%, signal=56%
GO:0070613	regulation of protein processing	1	-0.575342	-0.769549	0.841336	0.997814	0.988724	33	tags=100%, list=45%, signal=56%
GO:0071604	transforming growth factor beta production	1	-0.575342	-0.769549	0.841336	0.997814	0.988724	33	tags=100%, list=45%, signal=56%
GO:0071634	regulation of transforming growth factor beta production	1	-0.575342	-0.769549	0.841336	0.997814	0.988724	33	tags=100%, list=45%, signal=56%
GO:0071636	positive regulation of transforming growth factor beta production	1	-0.575342	-0.769549	0.841336	0.997814	0.988724	33	tags=100%, list=45%, signal=56%
GO:0080135	regulation of cellular response to stress	1	-0.575342	-0.769549	0.841336	0.997814	0.988724	33	tags=100%, list=45%, signal=56%
GO:0097659	nucleic acid-templated transcription	1	-0.575342	-0.769549	0.841336	0.997814	0.988724	33	tags=100%, list=45%, signal=56%
GO:0097746	regulation of blood vessel diameter	1	-0.575342	-0.769549	0.841336	0.997814	0.988724	33	tags=100%, list=45%, signal=56%
GO:1900048	positive regulation of hemostasis	1	-0.575342	-0.769549	0.841336	0.997814	0.988724	33	tags=100%, list=45%, signal=56%
GO:1901362	organic cyclic compound biosynthetic process	1	-0.575342	-0.769549	0.841336	0.997814	0.988724	33	tags=100%, list=45%, signal=56%
GO:1902680	positive regulation of RNA biosynthetic process	1	-0.575342	-0.769549	0.841336	0.997814	0.988724	33	tags=100%, list=45%, signal=56%
GO:1903317	regulation of protein maturation	1	-0.575342	-0.769549	0.841336	0.997814	0.988724	33	tags=100%, list=45%, signal=56%
GO:1903318	negative regulation of protein maturation	1	-0.575342	-0.769549	0.841336	0.997814	0.988724	33	tags=100%, list=45%, signal=56%
GO:1903506	regulation of nucleic acid-templated transcription	1	-0.575342	-0.769549	0.841336	0.997814	0.988724	33	tags=100%, list=45%, signal=56%
GO:1903508	positive regulation of nucleic acid-templated transcription	1	-0.575342	-0.769549	0.841336	0.997814	0.988724	33	tags=100%, list=45%, signal=56%
GO:2001141	regulation of RNA biosynthetic process	1	-0.575342	-0.769549	0.841336	0.997814	0.988724	33	tags=100%, list=45%, signal=56%
GO:0042592	homeostatic process	4	-0.296494	-0.699984	0.843836	0.997814	0.988724	6	tags=75%, list=8%, signal=73%	P15497/Q29443/P26201
GO:0048878	chemical homeostasis	4	-0.296494	-0.699984	0.843836	0.997814	0.988724	6	tags=75%, list=8%, signal=73%	P15497/Q29443/P26201
GO:0050801	ion homeostasis	4	-0.296494	-0.699984	0.843836	0.997814	0.988724	6	tags=75%, list=8%, signal=73%	P15497/Q29443/P26201
GO:0065008	regulation of biological quality	10	-0.21875	-0.728983	0.850806	0.997814	0.988724	61	tags=80%, list=82%, signal=16%	P15497/P28800/Q29443/Q3SX14/O46375/P50448/Q3MHX6/P26201
GO:0031324	negative regulation of cellular metabolic process	6	0.300991	0.696598	0.855474	0.997814	0.988724	26	tags=50%, list=35%, signal=35%	P52176/P19035/Q7SIH1
GO:0032787	monocarboxylic acid metabolic process	3	0.385259	0.707935	0.864909	0.997814	0.988724	25	tags=67%, list=34%, signal=46%	Q58CQ9/P19035
GO:0048584	positive regulation of response to stimulus	8	0.275259	0.694105	0.875342	0.997814	0.988724	14	tags=25%, list=19%, signal=23%	P52176/Q28085
GO:0006979	response to oxidative stress	2	0.467834	0.755096	0.877797	0.997814	0.988724	9	tags=50%, list=12%, signal=45%	P52176
GO:0060255	regulation of macromolecule metabolic process	12	0.233757	0.670299	0.87915	0.997814	0.988724	43	tags=75%, list=58%, signal=38%	Q8SPP7/P52176/Q7SIH1/P48616/Q2TBI0/Q3T052/P63258/P15497/P28800
GO:0007186	G protein-coupled receptor signaling pathway	2	0.458333	0.739762	0.886403	0.997814	0.988724	41	tags=100%, list=55%, signal=46%	P19035/P15497
GO:0008610	lipid biosynthetic process	2	0.458333	0.739762	0.886403	0.997814	0.988724	41	tags=100%, list=55%, signal=46%	P19035/P15497
GO:0010901	regulation of very-low-density lipoprotein particle remodeling	2	0.458333	0.739762	0.886403	0.997814	0.988724	41	tags=100%, list=55%, signal=46%	P19035/P15497
GO:0010903	negative regulation of very-low-density lipoprotein particle remodeling	2	0.458333	0.739762	0.886403	0.997814	0.988724	41	tags=100%, list=55%, signal=46%	P19035/P15497
GO:0015748	organophosphate ester transport	2	0.458333	0.739762	0.886403	0.997814	0.988724	41	tags=100%, list=55%, signal=46%	P19035/P15497
GO:0015914	phospholipid transport	2	0.458333	0.739762	0.886403	0.997814	0.988724	41	tags=100%, list=55%, signal=46%	P19035/P15497
GO:0032368	regulation of lipid transport	2	0.458333	0.739762	0.886403	0.997814	0.988724	41	tags=100%, list=55%, signal=46%	P19035/P15497
GO:0032371	regulation of sterol transport	2	0.458333	0.739762	0.886403	0.997814	0.988724	41	tags=100%, list=55%, signal=46%	P19035/P15497
GO:0032374	regulation of cholesterol transport	2	0.458333	0.739762	0.886403	0.997814	0.988724	41	tags=100%, list=55%, signal=46%	P19035/P15497
GO:0032488	Cdc42 protein signal transduction	2	0.458333	0.739762	0.886403	0.997814	0.988724	41	tags=100%, list=55%, signal=46%	P19035/P15497
GO:0032489	regulation of Cdc42 protein signal transduction	2	0.458333	0.739762	0.886403	0.997814	0.988724	41	tags=100%, list=55%, signal=46%	P19035/P15497
GO:0033700	phospholipid efflux	2	0.458333	0.739762	0.886403	0.997814	0.988724	41	tags=100%, list=55%, signal=46%	P19035/P15497
GO:0034097	response to cytokine	2	0.458333	0.739762	0.886403	0.997814	0.988724	41	tags=100%, list=55%, signal=46%	P48616/P15497
GO:0034367	protein-containing complex remodeling	2	0.458333	0.739762	0.886403	0.997814	0.988724	41	tags=100%, list=55%, signal=46%	P19035/P15497
GO:0034368	protein-lipid complex remodeling	2	0.458333	0.739762	0.886403	0.997814	0.988724	41	tags=100%, list=55%, signal=46%	P19035/P15497
GO:0034369	plasma lipoprotein particle remodeling	2	0.458333	0.739762	0.886403	0.997814	0.988724	41	tags=100%, list=55%, signal=46%	P19035/P15497
GO:0034370	triglyceride-rich lipoprotein particle remodeling	2	0.458333	0.739762	0.886403	0.997814	0.988724	41	tags=100%, list=55%, signal=46%	P19035/P15497
GO:0034372	very-low-density lipoprotein particle remodeling	2	0.458333	0.739762	0.886403	0.997814	0.988724	41	tags=100%, list=55%, signal=46%	P19035/P15497
GO:0034375	high-density lipoprotein particle remodeling	2	0.458333	0.739762	0.886403	0.997814	0.988724	41	tags=100%, list=55%, signal=46%	P19035/P15497
GO:0046486	glycerolipid metabolic process	2	0.458333	0.739762	0.886403	0.997814	0.988724	41	tags=100%, list=55%, signal=46%	P19035/P15497
GO:0048468	cell development	2	0.458333	0.739762	0.886403	0.997814	0.988724	41	tags=100%, list=55%, signal=46%	P48616/P15497
GO:0060284	regulation of cell development	2	0.458333	0.739762	0.886403	0.997814	0.988724	41	tags=100%, list=55%, signal=46%	P48616/P15497
GO:0060627	regulation of vesicle-mediated transport	2	0.458333	0.739762	0.886403	0.997814	0.988724	41	tags=100%, list=55%, signal=46%	P19035/P15497
GO:0071345	cellular response to cytokine stimulus	2	0.458333	0.739762	0.886403	0.997814	0.988724	41	tags=100%, list=55%, signal=46%	P48616/P15497
GO:1905952	regulation of lipid localization	2	0.458333	0.739762	0.886403	0.997814	0.988724	41	tags=100%, list=55%, signal=46%	P19035/P15497
GO:0065007	biological regulation	24	0.199181	0.671801	0.887117	0.997814	0.988724	44	tags=62%, list=59%, signal=37%	Q8SPP7/Q9TU03/P52176/Q28085/Q3SZV7/P19035/Q7SIH1/P48616/O77482/Q2TBI0/Q3T052/P63258/P15497/P28800/Q29443
GO:0051128	regulation of cellular component organization	10	0.240026	0.658418	0.887417	0.997814	0.988724	9	tags=20%, list=12%, signal=20%	Q9TU03/P52176
GO:0006629	lipid metabolic process	3	-0.338028	-0.683324	0.89196	0.997814	0.988724	51	tags=100%, list=69%, signal=32%	P15497/O46375
GO:0033344	cholesterol efflux	3	-0.338028	-0.683324	0.89196	0.997814	0.988724	51	tags=100%, list=69%, signal=32%	P15497/Q03247
GO:0042157	lipoprotein metabolic process	3	-0.338028	-0.683324	0.89196	0.997814	0.988724	51	tags=100%, list=69%, signal=32%	P15497/Q03247
GO:0044255	cellular lipid metabolic process	3	-0.338028	-0.683324	0.89196	0.997814	0.988724	51	tags=100%, list=69%, signal=32%	P15497/O46375
GO:0071825	protein-lipid complex subunit organization	3	-0.338028	-0.683324	0.89196	0.997814	0.988724	51	tags=100%, list=69%, signal=32%	P15497/Q03247
GO:0071827	plasma lipoprotein particle organization	3	-0.338028	-0.683324	0.89196	0.997814	0.988724	51	tags=100%, list=69%, signal=32%	P15497/Q03247
GO:0097006	regulation of plasma lipoprotein particle levels	3	-0.338028	-0.683324	0.89196	0.997814	0.988724	51	tags=100%, list=69%, signal=32%	P15497/Q03247
GO:0034381	plasma lipoprotein particle clearance	2	0.457056	0.7377	0.895009	0.997814	0.988724	25	tags=50%, list=34%, signal=34%	P19035
GO:0034382	chylomicron remnant clearance	2	0.457056	0.7377	0.895009	0.997814	0.988724	25	tags=50%, list=34%, signal=34%	P19035
GO:0071830	triglyceride-rich lipoprotein particle clearance	2	0.457056	0.7377	0.895009	0.997814	0.988724	25	tags=50%, list=34%, signal=34%	P19035
GO:0000902	cell morphogenesis	1	-0.547945	-0.732904	0.897704	0.997814	0.988724	35	tags=100%, list=47%, signal=53%
GO:0000904	cell morphogenesis involved in differentiation	1	-0.547945	-0.732904	0.897704	0.997814	0.988724	35	tags=100%, list=47%, signal=53%
GO:0001935	endothelial cell proliferation	1	-0.547945	-0.732904	0.897704	0.997814	0.988724	35	tags=100%, list=47%, signal=53%
GO:0001959	regulation of cytokine-mediated signaling pathway	1	-0.547945	-0.732904	0.897704	0.997814	0.988724	35	tags=100%, list=47%, signal=53%
GO:0001960	negative regulation of cytokine-mediated signaling pathway	1	-0.547945	-0.732904	0.897704	0.997814	0.988724	35	tags=100%, list=47%, signal=53%
GO:0006644	phospholipid metabolic process	1	-0.547945	-0.732904	0.897704	0.997814	0.988724	35	tags=100%, list=47%, signal=53%
GO:0006650	glycerophospholipid metabolic process	1	-0.547945	-0.732904	0.897704	0.997814	0.988724	35	tags=100%, list=47%, signal=53%
GO:0006656	phosphatidylcholine biosynthetic process	1	-0.547945	-0.732904	0.897704	0.997814	0.988724	35	tags=100%, list=47%, signal=53%
GO:0006909	phagocytosis	1	-0.547945	-0.732904	0.897704	0.997814	0.988724	35	tags=100%, list=47%, signal=53%
GO:0006935	chemotaxis	1	-0.547945	-0.732904	0.897704	0.997814	0.988724	35	tags=100%, list=47%, signal=53%
GO:0007162	negative regulation of cell adhesion	1	-0.547945	-0.732904	0.897704	0.997814	0.988724	35	tags=100%, list=47%, signal=53%
GO:0007229	integrin-mediated signaling pathway	1	-0.547945	-0.732904	0.897704	0.997814	0.988724	35	tags=100%, list=47%, signal=53%
GO:0008202	steroid metabolic process	1	-0.547945	-0.732904	0.897704	0.997814	0.988724	35	tags=100%, list=47%, signal=53%
GO:0008211	glucocorticoid metabolic process	1	-0.547945	-0.732904	0.897704	0.997814	0.988724	35	tags=100%, list=47%, signal=53%
GO:0008654	phospholipid biosynthetic process	1	-0.547945	-0.732904	0.897704	0.997814	0.988724	35	tags=100%, list=47%, signal=53%
GO:0010470	regulation of gastrulation	1	-0.547945	-0.732904	0.897704	0.997814	0.988724	35	tags=100%, list=47%, signal=53%
GO:0010720	positive regulation of cell development	1	-0.547945	-0.732904	0.897704	0.997814	0.988724	35	tags=100%, list=47%, signal=53%
GO:0010769	regulation of cell morphogenesis involved in differentiation	1	-0.547945	-0.732904	0.897704	0.997814	0.988724	35	tags=100%, list=47%, signal=53%
GO:0010770	positive regulation of cell morphogenesis involved in differentiation	1	-0.547945	-0.732904	0.897704	0.997814	0.988724	35	tags=100%, list=47%, signal=53%
GO:0010803	regulation of tumor necrosis factor-mediated signaling pathway	1	-0.547945	-0.732904	0.897704	0.997814	0.988724	35	tags=100%, list=47%, signal=53%
GO:0010804	negative regulation of tumor necrosis factor-mediated signaling pathway	1	-0.547945	-0.732904	0.897704	0.997814	0.988724	35	tags=100%, list=47%, signal=53%
GO:0010811	positive regulation of cell-substrate adhesion	1	-0.547945	-0.732904	0.897704	0.997814	0.988724	35	tags=100%, list=47%, signal=53%
GO:0010874	regulation of cholesterol efflux	1	-0.547945	-0.732904	0.897704	0.997814	0.988724	35	tags=100%, list=47%, signal=53%
GO:0010875	positive regulation of cholesterol efflux	1	-0.547945	-0.732904	0.897704	0.997814	0.988724	35	tags=100%, list=47%, signal=53%
GO:0018158	protein oxidation	1	-0.547945	-0.732904	0.897704	0.997814	0.988724	35	tags=100%, list=47%, signal=53%
GO:0018193	peptidyl-amino acid modification	1	-0.547945	-0.732904	0.897704	0.997814	0.988724	35	tags=100%, list=47%, signal=53%
GO:0018206	peptidyl-methionine modification	1	-0.547945	-0.732904	0.897704	0.997814	0.988724	35	tags=100%, list=47%, signal=53%
GO:0019221	cytokine-mediated signaling pathway	1	-0.547945	-0.732904	0.897704	0.997814	0.988724	35	tags=100%, list=47%, signal=53%
GO:0019637	organophosphate metabolic process	1	-0.547945	-0.732904	0.897704	0.997814	0.988724	35	tags=100%, list=47%, signal=53%
GO:0019915	lipid storage	1	-0.547945	-0.732904	0.897704	0.997814	0.988724	35	tags=100%, list=47%, signal=53%
GO:0022407	regulation of cell-cell adhesion	1	-0.547945	-0.732904	0.897704	0.997814	0.988724	35	tags=100%, list=47%, signal=53%
GO:0022408	negative regulation of cell-cell adhesion	1	-0.547945	-0.732904	0.897704	0.997814	0.988724	35	tags=100%, list=47%, signal=53%
GO:0022603	regulation of anatomical structure morphogenesis	1	-0.547945	-0.732904	0.897704	0.997814	0.988724	35	tags=100%, list=47%, signal=53%
GO:0022604	regulation of cell morphogenesis	1	-0.547945	-0.732904	0.897704	0.997814	0.988724	35	tags=100%, list=47%, signal=53%
GO:0030325	adrenal gland development	1	-0.547945	-0.732904	0.897704	0.997814	0.988724	35	tags=100%, list=47%, signal=53%
GO:0031647	regulation of protein stability	1	-0.547945	-0.732904	0.897704	0.997814	0.988724	35	tags=100%, list=47%, signal=53%
GO:0032370	positive regulation of lipid transport	1	-0.547945	-0.732904	0.897704	0.997814	0.988724	35	tags=100%, list=47%, signal=53%
GO:0032373	positive regulation of sterol transport	1	-0.547945	-0.732904	0.897704	0.997814	0.988724	35	tags=100%, list=47%, signal=53%
GO:0032376	positive regulation of cholesterol transport	1	-0.547945	-0.732904	0.897704	0.997814	0.988724	35	tags=100%, list=47%, signal=53%
GO:0033209	tumor necrosis factor-mediated signaling pathway	1	-0.547945	-0.732904	0.897704	0.997814	0.988724	35	tags=100%, list=47%, signal=53%
GO:0034113	heterotypic cell-cell adhesion	1	-0.547945	-0.732904	0.897704	0.997814	0.988724	35	tags=100%, list=47%, signal=53%
GO:0034114	regulation of heterotypic cell-cell adhesion	1	-0.547945	-0.732904	0.897704	0.997814	0.988724	35	tags=100%, list=47%, signal=53%
GO:0034115	negative regulation of heterotypic cell-cell adhesion	1	-0.547945	-0.732904	0.897704	0.997814	0.988724	35	tags=100%, list=47%, signal=53%
GO:0034446	substrate adhesion-dependent cell spreading	1	-0.547945	-0.732904	0.897704	0.997814	0.988724	35	tags=100%, list=47%, signal=53%
GO:0034612	response to tumor necrosis factor	1	-0.547945	-0.732904	0.897704	0.997814	0.988724	35	tags=100%, list=47%, signal=53%
GO:0035025	positive regulation of Rho protein signal transduction	1	-0.547945	-0.732904	0.897704	0.997814	0.988724	35	tags=100%, list=47%, signal=53%
GO:0035270	endocrine system development	1	-0.547945	-0.732904	0.897704	0.997814	0.988724	35	tags=100%, list=47%, signal=53%
GO:0042330	taxis	1	-0.547945	-0.732904	0.897704	0.997814	0.988724	35	tags=100%, list=47%, signal=53%
GO:0043270	positive regulation of ion transport	1	-0.547945	-0.732904	0.897704	0.997814	0.988724	35	tags=100%, list=47%, signal=53%
GO:0043534	blood vessel endothelial cell migration	1	-0.547945	-0.732904	0.897704	0.997814	0.988724	35	tags=100%, list=47%, signal=53%
GO:0043542	endothelial cell migration	1	-0.547945	-0.732904	0.897704	0.997814	0.988724	35	tags=100%, list=47%, signal=53%
GO:0044070	regulation of anion transport	1	-0.547945	-0.732904	0.897704	0.997814	0.988724	35	tags=100%, list=47%, signal=53%
GO:0045017	glycerolipid biosynthetic process	1	-0.547945	-0.732904	0.897704	0.997814	0.988724	35	tags=100%, list=47%, signal=53%
GO:0045785	positive regulation of cell adhesion	1	-0.547945	-0.732904	0.897704	0.997814	0.988724	35	tags=100%, list=47%, signal=53%
GO:0045995	regulation of embryonic development	1	-0.547945	-0.732904	0.897704	0.997814	0.988724	35	tags=100%, list=47%, signal=53%
GO:0046470	phosphatidylcholine metabolic process	1	-0.547945	-0.732904	0.897704	0.997814	0.988724	35	tags=100%, list=47%, signal=53%
GO:0046474	glycerophospholipid biosynthetic process	1	-0.547945	-0.732904	0.897704	0.997814	0.988724	35	tags=100%, list=47%, signal=53%
GO:0046579	positive regulation of Ras protein signal transduction	1	-0.547945	-0.732904	0.897704	0.997814	0.988724	35	tags=100%, list=47%, signal=53%
GO:0048732	gland development	1	-0.547945	-0.732904	0.897704	0.997814	0.988724	35	tags=100%, list=47%, signal=53%
GO:0050673	epithelial cell proliferation	1	-0.547945	-0.732904	0.897704	0.997814	0.988724	35	tags=100%, list=47%, signal=53%
GO:0050764	regulation of phagocytosis	1	-0.547945	-0.732904	0.897704	0.997814	0.988724	35	tags=100%, list=47%, signal=53%
GO:0050766	positive regulation of phagocytosis	1	-0.547945	-0.732904	0.897704	0.997814	0.988724	35	tags=100%, list=47%, signal=53%
GO:0050821	protein stabilization	1	-0.547945	-0.732904	0.897704	0.997814	0.988724	35	tags=100%, list=47%, signal=53%
GO:0050919	negative chemotaxis	1	-0.547945	-0.732904	0.897704	0.997814	0.988724	35	tags=100%, list=47%, signal=53%
GO:0051050	positive regulation of transport	1	-0.547945	-0.732904	0.897704	0.997814	0.988724	35	tags=100%, list=47%, signal=53%
GO:0051057	positive regulation of small GTPase mediated signal transduction	1	-0.547945	-0.732904	0.897704	0.997814	0.988724	35	tags=100%, list=47%, signal=53%
GO:0051180	vitamin transport	1	-0.547945	-0.732904	0.897704	0.997814	0.988724	35	tags=100%, list=47%, signal=53%
GO:0055081	anion homeostasis	1	-0.547945	-0.732904	0.897704	0.997814	0.988724	35	tags=100%, list=47%, signal=53%
GO:0055088	lipid homeostasis	1	-0.547945	-0.732904	0.897704	0.997814	0.988724	35	tags=100%, list=47%, signal=53%
GO:0055091	phospholipid homeostasis	1	-0.547945	-0.732904	0.897704	0.997814	0.988724	35	tags=100%, list=47%, signal=53%
GO:0060352	cell adhesion molecule production	1	-0.547945	-0.732904	0.897704	0.997814	0.988724	35	tags=100%, list=47%, signal=53%
GO:0060353	regulation of cell adhesion molecule production	1	-0.547945	-0.732904	0.897704	0.997814	0.988724	35	tags=100%, list=47%, signal=53%
GO:0060354	negative regulation of cell adhesion molecule production	1	-0.547945	-0.732904	0.897704	0.997814	0.988724	35	tags=100%, list=47%, signal=53%
GO:0060759	regulation of response to cytokine stimulus	1	-0.547945	-0.732904	0.897704	0.997814	0.988724	35	tags=100%, list=47%, signal=53%
GO:0060761	negative regulation of response to cytokine stimulus	1	-0.547945	-0.732904	0.897704	0.997814	0.988724	35	tags=100%, list=47%, signal=53%
GO:0061024	membrane organization	1	-0.547945	-0.732904	0.897704	0.997814	0.988724	35	tags=100%, list=47%, signal=53%
GO:0070586	cell-cell adhesion involved in gastrulation	1	-0.547945	-0.732904	0.897704	0.997814	0.988724	35	tags=100%, list=47%, signal=53%
GO:0070587	regulation of cell-cell adhesion involved in gastrulation	1	-0.547945	-0.732904	0.897704	0.997814	0.988724	35	tags=100%, list=47%, signal=53%
GO:0071356	cellular response to tumor necrosis factor	1	-0.547945	-0.732904	0.897704	0.997814	0.988724	35	tags=100%, list=47%, signal=53%
GO:0090407	organophosphate biosynthetic process	1	-0.547945	-0.732904	0.897704	0.997814	0.988724	35	tags=100%, list=47%, signal=53%
GO:0098609	cell-cell adhesion	1	-0.547945	-0.732904	0.897704	0.997814	0.988724	35	tags=100%, list=47%, signal=53%
GO:0098742	cell-cell adhesion via plasma-membrane adhesion molecules	1	-0.547945	-0.732904	0.897704	0.997814	0.988724	35	tags=100%, list=47%, signal=53%
GO:0120009	intermembrane lipid transfer	1	-0.547945	-0.732904	0.897704	0.997814	0.988724	35	tags=100%, list=47%, signal=53%
GO:1900024	regulation of substrate adhesion-dependent cell spreading	1	-0.547945	-0.732904	0.897704	0.997814	0.988724	35	tags=100%, list=47%, signal=53%
GO:1900026	positive regulation of substrate adhesion-dependent cell spreading	1	-0.547945	-0.732904	0.897704	0.997814	0.988724	35	tags=100%, list=47%, signal=53%
GO:1902994	regulation of phospholipid efflux	1	-0.547945	-0.732904	0.897704	0.997814	0.988724	35	tags=100%, list=47%, signal=53%
GO:1902995	positive regulation of phospholipid efflux	1	-0.547945	-0.732904	0.897704	0.997814	0.988724	35	tags=100%, list=47%, signal=53%
GO:1903793	positive regulation of anion transport	1	-0.547945	-0.732904	0.897704	0.997814	0.988724	35	tags=100%, list=47%, signal=53%
GO:1905954	positive regulation of lipid localization	1	-0.547945	-0.732904	0.897704	0.997814	0.988724	35	tags=100%, list=47%, signal=53%
GO:2001138	regulation of phospholipid transport	1	-0.547945	-0.732904	0.897704	0.997814	0.988724	35	tags=100%, list=47%, signal=53%
GO:2001140	positive regulation of phospholipid transport	1	-0.547945	-0.732904	0.897704	0.997814	0.988724	35	tags=100%, list=47%, signal=53%
GO:0044260	cellular macromolecule metabolic process	10	-0.19952	-0.664899	0.907258	0.997814	0.988724	50	tags=30%, list=68%, signal=11%	Q3MHX6/P13696/P26201
GO:0002274	myeloid leukocyte activation	1	0.547945	0.726286	0.910134	0.997814	0.988724	34	tags=100%, list=46%, signal=55%	Q2TBI0
GO:0002275	myeloid cell activation involved in immune response	1	0.547945	0.726286	0.910134	0.997814	0.988724	34	tags=100%, list=46%, signal=55%	Q2TBI0
GO:0002281	macrophage activation involved in immune response	1	0.547945	0.726286	0.910134	0.997814	0.988724	34	tags=100%, list=46%, signal=55%	Q2TBI0
GO:0032640	tumor necrosis factor production	1	0.547945	0.726286	0.910134	0.997814	0.988724	34	tags=100%, list=46%, signal=55%	Q2TBI0
GO:0032680	regulation of tumor necrosis factor production	1	0.547945	0.726286	0.910134	0.997814	0.988724	34	tags=100%, list=46%, signal=55%	Q2TBI0
GO:0032760	positive regulation of tumor necrosis factor production	1	0.547945	0.726286	0.910134	0.997814	0.988724	34	tags=100%, list=46%, signal=55%	Q2TBI0
GO:0042116	macrophage activation	1	0.547945	0.726286	0.910134	0.997814	0.988724	34	tags=100%, list=46%, signal=55%	Q2TBI0
GO:0071706	tumor necrosis factor superfamily cytokine production	1	0.547945	0.726286	0.910134	0.997814	0.988724	34	tags=100%, list=46%, signal=55%	Q2TBI0
GO:1903555	regulation of tumor necrosis factor superfamily cytokine production	1	0.547945	0.726286	0.910134	0.997814	0.988724	34	tags=100%, list=46%, signal=55%	Q2TBI0
GO:1903557	positive regulation of tumor necrosis factor superfamily cytokine production	1	0.547945	0.726286	0.910134	0.997814	0.988724	34	tags=100%, list=46%, signal=55%	Q2TBI0
GO:0080090	regulation of primary metabolic process	10	-0.197034	-0.656615	0.91129	0.997814	0.988724	51	tags=90%, list=69%, signal=32%	P19035/Q7SIH1/P48616/Q3T052/P15497/P28800/Q03247/P13696/P26201
GO:0001934	positive regulation of protein phosphorylation	3	0.357813	0.657501	0.924217	0.997814	0.988724	9	tags=33%, list=12%, signal=31%	P52176
GO:0010562	positive regulation of phosphorus metabolic process	3	0.357813	0.657501	0.924217	0.997814	0.988724	9	tags=33%, list=12%, signal=31%	P52176
GO:0031401	positive regulation of protein modification process	3	0.357813	0.657501	0.924217	0.997814	0.988724	9	tags=33%, list=12%, signal=31%	P52176
GO:0042327	positive regulation of phosphorylation	3	0.357813	0.657501	0.924217	0.997814	0.988724	9	tags=33%, list=12%, signal=31%	P52176
GO:0045937	positive regulation of phosphate metabolic process	3	0.357813	0.657501	0.924217	0.997814	0.988724	9	tags=33%, list=12%, signal=31%	P52176
GO:0044265	cellular macromolecule catabolic process	2	-0.388889	-0.660843	0.924883	0.997814	0.988724	47	tags=50%, list=64%, signal=19%	Q3MHX6
GO:0001932	regulation of protein phosphorylation	4	0.29112	0.588138	0.934375	0.997814	0.988724	9	tags=25%, list=12%, signal=23%	P52176
GO:0006464	cellular protein modification process	4	0.29112	0.588138	0.934375	0.997814	0.988724	9	tags=25%, list=12%, signal=23%	P52176
GO:0006468	protein phosphorylation	4	0.29112	0.588138	0.934375	0.997814	0.988724	9	tags=25%, list=12%, signal=23%	P52176
GO:0006793	phosphorus metabolic process	4	0.29112	0.588138	0.934375	0.997814	0.988724	9	tags=25%, list=12%, signal=23%	P52176
GO:0006796	phosphate-containing compound metabolic process	4	0.29112	0.588138	0.934375	0.997814	0.988724	9	tags=25%, list=12%, signal=23%	P52176
GO:0009967	positive regulation of signal transduction	4	0.29112	0.588138	0.934375	0.997814	0.988724	9	tags=25%, list=12%, signal=23%	P52176
GO:0010647	positive regulation of cell communication	4	0.29112	0.588138	0.934375	0.997814	0.988724	9	tags=25%, list=12%, signal=23%	P52176
GO:0016310	phosphorylation	4	0.29112	0.588138	0.934375	0.997814	0.988724	9	tags=25%, list=12%, signal=23%	P52176
GO:0019220	regulation of phosphate metabolic process	4	0.29112	0.588138	0.934375	0.997814	0.988724	9	tags=25%, list=12%, signal=23%	P52176
GO:0023056	positive regulation of signaling	4	0.29112	0.588138	0.934375	0.997814	0.988724	9	tags=25%, list=12%, signal=23%	P52176
GO:0031399	regulation of protein modification process	4	0.29112	0.588138	0.934375	0.997814	0.988724	9	tags=25%, list=12%, signal=23%	P52176
GO:0036211	protein modification process	4	0.29112	0.588138	0.934375	0.997814	0.988724	9	tags=25%, list=12%, signal=23%	P52176
GO:0042325	regulation of phosphorylation	4	0.29112	0.588138	0.934375	0.997814	0.988724	9	tags=25%, list=12%, signal=23%	P52176
GO:0043412	macromolecule modification	4	0.29112	0.588138	0.934375	0.997814	0.988724	9	tags=25%, list=12%, signal=23%	P52176
GO:0051174	regulation of phosphorus metabolic process	4	0.29112	0.588138	0.934375	0.997814	0.988724	9	tags=25%, list=12%, signal=23%	P52176
GO:1901700	response to oxygen-containing compound	4	0.296433	0.598873	0.934375	0.997814	0.988724	34	tags=75%, list=46%, signal=43%	P52176/P48616/Q2TBI0
GO:0006139	nucleobase-containing compound metabolic process	2	0.430556	0.694928	0.938038	0.997814	0.988724	43	tags=100%, list=58%, signal=43%	P48616/P28800
GO:0006725	cellular aromatic compound metabolic process	2	0.430556	0.694928	0.938038	0.997814	0.988724	43	tags=100%, list=58%, signal=43%	P48616/P28800
GO:0009891	positive regulation of biosynthetic process	2	0.430556	0.694928	0.938038	0.997814	0.988724	43	tags=100%, list=58%, signal=43%	P48616/P28800
GO:0010556	regulation of macromolecule biosynthetic process	2	0.430556	0.694928	0.938038	0.997814	0.988724	43	tags=100%, list=58%, signal=43%	P48616/P28800
GO:0010557	positive regulation of macromolecule biosynthetic process	2	0.430556	0.694928	0.938038	0.997814	0.988724	43	tags=100%, list=58%, signal=43%	P48616/P28800
GO:0010712	regulation of collagen metabolic process	2	0.430556	0.694928	0.938038	0.997814	0.988724	43	tags=100%, list=58%, signal=43%	P48616/P28800
GO:0010714	positive regulation of collagen metabolic process	2	0.430556	0.694928	0.938038	0.997814	0.988724	43	tags=100%, list=58%, signal=43%	P48616/P28800
GO:0016070	RNA metabolic process	2	0.430556	0.694928	0.938038	0.997814	0.988724	43	tags=100%, list=58%, signal=43%	P48616/P28800
GO:0019219	regulation of nucleobase-containing compound metabolic process	2	0.430556	0.694928	0.938038	0.997814	0.988724	43	tags=100%, list=58%, signal=43%	P48616/P28800
GO:0031328	positive regulation of cellular biosynthetic process	2	0.430556	0.694928	0.938038	0.997814	0.988724	43	tags=100%, list=58%, signal=43%	P48616/P28800
GO:0032963	collagen metabolic process	2	0.430556	0.694928	0.938038	0.997814	0.988724	43	tags=100%, list=58%, signal=43%	P48616/P28800
GO:0032964	collagen biosynthetic process	2	0.430556	0.694928	0.938038	0.997814	0.988724	43	tags=100%, list=58%, signal=43%	P48616/P28800
GO:0032965	regulation of collagen biosynthetic process	2	0.430556	0.694928	0.938038	0.997814	0.988724	43	tags=100%, list=58%, signal=43%	P48616/P28800
GO:0032967	positive regulation of collagen biosynthetic process	2	0.430556	0.694928	0.938038	0.997814	0.988724	43	tags=100%, list=58%, signal=43%	P48616/P28800
GO:0044271	cellular nitrogen compound biosynthetic process	2	0.430556	0.694928	0.938038	0.997814	0.988724	43	tags=100%, list=58%, signal=43%	P48616/P28800
GO:0046483	heterocycle metabolic process	2	0.430556	0.694928	0.938038	0.997814	0.988724	43	tags=100%, list=58%, signal=43%	P48616/P28800
GO:0051252	regulation of RNA metabolic process	2	0.430556	0.694928	0.938038	0.997814	0.988724	43	tags=100%, list=58%, signal=43%	P48616/P28800
GO:0090304	nucleic acid metabolic process	2	0.430556	0.694928	0.938038	0.997814	0.988724	43	tags=100%, list=58%, signal=43%	P48616/P28800
GO:2000112	regulation of cellular macromolecule biosynthetic process	2	0.430556	0.694928	0.938038	0.997814	0.988724	43	tags=100%, list=58%, signal=43%	P48616/P28800
GO:0043170	macromolecule metabolic process	15	0.194873	0.595733	0.940051	0.997814	0.988724	43	tags=67%, list=58%, signal=35%	Q8SPP7/P52176/P19035/Q7SIH1/P48616/Q2TBI0/Q3T052/P63258/P15497/P28800
GO:0008152	metabolic process	19	0.172798	0.559679	0.943419	0.997814	0.988724	43	tags=63%, list=58%, signal=36%	Q8SPP7/P52176/Q58CQ9/Q29437/P19035/Q7SIH1/P48616/Q2TBI0/Q3T052/P63258/P15497/P28800
GO:0071704	organic substance metabolic process	19	0.172798	0.559679	0.943419	0.997814	0.988724	43	tags=63%, list=58%, signal=36%	Q8SPP7/P52176/Q58CQ9/Q29437/P19035/Q7SIH1/P48616/Q2TBI0/Q3T052/P63258/P15497/P28800
GO:0001525	angiogenesis	1	-0.520548	-0.696259	0.958246	0.997814	0.988724	37	tags=100%, list=50%, signal=51%
GO:0001738	morphogenesis of a polarized epithelium	1	-0.520548	-0.696259	0.958246	0.997814	0.988724	37	tags=100%, list=50%, signal=51%
GO:0001952	regulation of cell-matrix adhesion	1	-0.520548	-0.696259	0.958246	0.997814	0.988724	37	tags=100%, list=50%, signal=51%
GO:0002009	morphogenesis of an epithelium	1	-0.520548	-0.696259	0.958246	0.997814	0.988724	37	tags=100%, list=50%, signal=51%
GO:0007043	cell-cell junction assembly	1	-0.520548	-0.696259	0.958246	0.997814	0.988724	37	tags=100%, list=50%, signal=51%
GO:0007044	cell-substrate junction assembly	1	-0.520548	-0.696259	0.958246	0.997814	0.988724	37	tags=100%, list=50%, signal=51%
GO:0007160	cell-matrix adhesion	1	-0.520548	-0.696259	0.958246	0.997814	0.988724	37	tags=100%, list=50%, signal=51%
GO:0034329	cell junction assembly	1	-0.520548	-0.696259	0.958246	0.997814	0.988724	37	tags=100%, list=50%, signal=51%
GO:0034330	cell junction organization	1	-0.520548	-0.696259	0.958246	0.997814	0.988724	37	tags=100%, list=50%, signal=51%
GO:0045216	cell-cell junction organization	1	-0.520548	-0.696259	0.958246	0.997814	0.988724	37	tags=100%, list=50%, signal=51%
GO:0048041	focal adhesion assembly	1	-0.520548	-0.696259	0.958246	0.997814	0.988724	37	tags=100%, list=50%, signal=51%
GO:0048729	tissue morphogenesis	1	-0.520548	-0.696259	0.958246	0.997814	0.988724	37	tags=100%, list=50%, signal=51%
GO:0050808	synapse organization	1	-0.520548	-0.696259	0.958246	0.997814	0.988724	37	tags=100%, list=50%, signal=51%
GO:0051893	regulation of focal adhesion assembly	1	-0.520548	-0.696259	0.958246	0.997814	0.988724	37	tags=100%, list=50%, signal=51%
GO:0090109	regulation of cell-substrate junction assembly	1	-0.520548	-0.696259	0.958246	0.997814	0.988724	37	tags=100%, list=50%, signal=51%
GO:0098974	postsynaptic actin cytoskeleton organization	1	-0.520548	-0.696259	0.958246	0.997814	0.988724	37	tags=100%, list=50%, signal=51%
GO:0099173	postsynapse organization	1	-0.520548	-0.696259	0.958246	0.997814	0.988724	37	tags=100%, list=50%, signal=51%
GO:0099188	postsynaptic cytoskeleton organization	1	-0.520548	-0.696259	0.958246	0.997814	0.988724	37	tags=100%, list=50%, signal=51%
GO:0120192	tight junction assembly	1	-0.520548	-0.696259	0.958246	0.997814	0.988724	37	tags=100%, list=50%, signal=51%
GO:0120193	tight junction organization	1	-0.520548	-0.696259	0.958246	0.997814	0.988724	37	tags=100%, list=50%, signal=51%
GO:0150105	protein localization to cell-cell junction	1	-0.520548	-0.696259	0.958246	0.997814	0.988724	37	tags=100%, list=50%, signal=51%
GO:0150115	cell-substrate junction organization	1	-0.520548	-0.696259	0.958246	0.997814	0.988724	37	tags=100%, list=50%, signal=51%
GO:0150116	regulation of cell-substrate junction organization	1	-0.520548	-0.696259	0.958246	0.997814	0.988724	37	tags=100%, list=50%, signal=51%
GO:1901888	regulation of cell junction assembly	1	-0.520548	-0.696259	0.958246	0.997814	0.988724	37	tags=100%, list=50%, signal=51%
GO:1902396	protein localization to bicellular tight junction	1	-0.520548	-0.696259	0.958246	0.997814	0.988724	37	tags=100%, list=50%, signal=51%
GO:1902414	protein localization to cell junction	1	-0.520548	-0.696259	0.958246	0.997814	0.988724	37	tags=100%, list=50%, signal=51%
GO:0044267	cellular protein metabolic process	9	-0.18695	-0.595453	0.96124	0.997814	0.988724	50	tags=33%, list=68%, signal=12%	Q3MHX6/P13696/P26201
GO:0071702	organic substance transport	6	-0.205882	-0.573563	0.962145	0.997814	0.988724	61	tags=100%, list=82%, signal=19%	P19035/Q2TBI0/P15497/Q03247/P26201
GO:0010466	negative regulation of peptidase activity	4	0.269123	0.543698	0.967187	0.997814	0.988724	38	tags=75%, list=51%, signal=39%	P52176/Q7SIH1/Q3T052
GO:0010951	negative regulation of endopeptidase activity	4	0.269123	0.543698	0.967187	0.997814	0.988724	38	tags=75%, list=51%, signal=39%	P52176/Q7SIH1/Q3T052
GO:0052547	regulation of peptidase activity	4	0.269123	0.543698	0.967187	0.997814	0.988724	38	tags=75%, list=51%, signal=39%	P52176/Q7SIH1/Q3T052
GO:0052548	regulation of endopeptidase activity	4	0.269123	0.543698	0.967187	0.997814	0.988724	38	tags=75%, list=51%, signal=39%	P52176/Q7SIH1/Q3T052
GO:0043086	negative regulation of catalytic activity	5	0.256858	0.556168	0.969559	0.997814	0.988724	41	tags=80%, list=55%, signal=38%	P52176/Q7SIH1/Q3T052/P15497
GO:0044092	negative regulation of molecular function	5	0.256858	0.556168	0.969559	0.997814	0.988724	41	tags=80%, list=55%, signal=38%	P52176/Q7SIH1/Q3T052/P15497
GO:0051130	positive regulation of cellular component organization	5	0.257807	0.558223	0.969559	0.997814	0.988724	9	tags=20%, list=12%, signal=19%	P52176
GO:0051346	negative regulation of hydrolase activity	5	0.256858	0.556168	0.969559	0.997814	0.988724	41	tags=80%, list=55%, signal=38%	P52176/Q7SIH1/Q3T052/P15497
GO:0010243	response to organonitrogen compound	4	-0.231462	-0.546451	0.969863	0.997814	0.988724	15	tags=50%, list=20%, signal=42%	Q3MHX6/P26201
GO:1901698	response to nitrogen compound	4	-0.231462	-0.546451	0.969863	0.997814	0.988724	15	tags=50%, list=20%, signal=42%	Q3MHX6/P26201
GO:0006082	organic acid metabolic process	4	0.26596	0.537308	0.970313	0.997814	0.988724	25	tags=50%, list=34%, signal=35%	Q58CQ9/P19035
GO:0019752	carboxylic acid metabolic process	4	0.26596	0.537308	0.970313	0.997814	0.988724	25	tags=50%, list=34%, signal=35%	Q58CQ9/P19035
GO:0043436	oxoacid metabolic process	4	0.26596	0.537308	0.970313	0.997814	0.988724	25	tags=50%, list=34%, signal=35%	Q58CQ9/P19035
GO:0030030	cell projection organization	2	0.389342	0.628408	0.972461	0.997814	0.988724	29	tags=50%, list=39%, signal=31%	P48616
GO:0120036	plasma membrane bounded cell projection organization	2	0.389342	0.628408	0.972461	0.997814	0.988724	29	tags=50%, list=39%, signal=31%	P48616
GO:0051171	regulation of nitrogen compound metabolic process	9	-0.182603	-0.581606	0.972868	0.997814	0.988724	50	tags=89%, list=68%, signal=33%	Q7SIH1/P48616/Q3T052/P15497/P28800/Q03247/P13696/P26201
GO:0051246	regulation of protein metabolic process	9	-0.182603	-0.581606	0.972868	0.997814	0.988724	50	tags=89%, list=68%, signal=33%	Q7SIH1/P48616/Q3T052/P15497/P28800/Q03247/P13696/P26201
GO:0031323	regulation of cellular metabolic process	9	0.192397	0.510311	0.977151	0.998383	0.989289	43	tags=78%, list=58%, signal=37%	P52176/P19035/Q7SIH1/P48616/Q3T052/P15497/P28800
GO:0006810	transport	9	0.187931	0.498464	0.981183	0.998383	0.989289	25	tags=33%, list=34%, signal=25%	P52176/Q3SZV7/P19035
GO:0051234	establishment of localization	9	0.187931	0.498464	0.981183	0.998383	0.989289	25	tags=33%, list=34%, signal=25%	P52176/Q3SZV7/P19035
GO:0009893	positive regulation of metabolic process	6	0.228614	0.529091	0.982482	0.998383	0.989289	43	tags=83%, list=58%, signal=38%	P52176/P48616/Q2TBI0/P63258/P28800
GO:0010604	positive regulation of macromolecule metabolic process	6	0.228614	0.529091	0.982482	0.998383	0.989289	43	tags=83%, list=58%, signal=38%	P52176/P48616/Q2TBI0/P63258/P28800
GO:0048518	positive regulation of biological process	12	0.167271	0.479651	0.985392	0.998383	0.989289	54	tags=92%, list=73%, signal=30%	P52176/Q28085/P48616/Q2TBI0/P63258/P15497/P28800/P81187/Q3SX14/P50448/Q03247
GO:0044281	small molecule metabolic process	5	0.230135	0.498306	0.986301	0.998383	0.989289	25	tags=40%, list=34%, signal=28%	Q58CQ9/P19035
GO:0044237	cellular metabolic process	14	-0.141416	-0.537822	0.986784	0.998383	0.989289	15	tags=29%, list=20%, signal=28%	Q3MHX6/P13696/Q9XSG3/P26201
GO:0031325	positive regulation of cellular metabolic process	4	0.235533	0.475839	0.9875	0.998383	0.989289	9	tags=25%, list=12%, signal=23%	P52176
GO:0032270	positive regulation of cellular protein metabolic process	4	0.235533	0.475839	0.9875	0.998383	0.989289	9	tags=25%, list=12%, signal=23%	P52176
GO:0051173	positive regulation of nitrogen compound metabolic process	4	0.235533	0.475839	0.9875	0.998383	0.989289	9	tags=25%, list=12%, signal=23%	P52176
GO:0051247	positive regulation of protein metabolic process	4	0.235533	0.475839	0.9875	0.998383	0.989289	9	tags=25%, list=12%, signal=23%	P52176
GO:0030162	regulation of proteolysis	5	0.225012	0.487214	0.987823	0.998383	0.989289	43	tags=80%, list=58%, signal=36%	P52176/Q7SIH1/Q3T052/P28800
GO:0032269	negative regulation of cellular protein metabolic process	5	0.225012	0.487214	0.987823	0.998383	0.989289	43	tags=80%, list=58%, signal=36%	P52176/Q7SIH1/Q3T052/P28800
GO:0045861	negative regulation of proteolysis	5	0.225012	0.487214	0.987823	0.998383	0.989289	43	tags=80%, list=58%, signal=36%	P52176/Q7SIH1/Q3T052/P28800
GO:0007166	cell surface receptor signaling pathway	4	0.230134	0.464931	0.989062	0.998665	0.989568	9	tags=25%, list=12%, signal=23%	P52176
GO:0055114	oxidation-reduction process	3	0.244731	0.449706	0.99341	1	0.990891	16	tags=33%, list=22%, signal=27%	Q29437
GO:0051179	localization	11	0.150803	0.420337	0.996016	1	0.990891	44	tags=64%, list=59%, signal=30%	P52176/Q3SZV7/P19035/Q2TBI0/P63258/P15497/Q29443
GO:0032268	regulation of cellular protein metabolic process	8	-0.169298	-0.516603	0.996324	1	0.990891	50	tags=25%, list=68%, signal=9%	P13696/P26201
GO:0048522	positive regulation of cellular process	7	0.162012	0.391333	0.997179	1	0.990891	43	tags=71%, list=58%, signal=33%	P52176/P48616/P63258/P15497/P28800
GO:0006508	proteolysis	7	0.149254	0.360517	0.99859	1	0.990891	64	tags=100%, list=86%, signal=15%	P52176/Q7SIH1/Q3T052/P28800/P81187/Q3MHX6/P13696
GO:0010033	response to organic substance	6	-0.155868	-0.434228	1	1	0.990891	6	tags=33%, list=8%, signal=33%	Q3MHX6/P26201
GO:0030212	hyaluronan metabolic process	1	-0.506849	-0.677936	1	1	0.990891	38	tags=100%, list=51%, signal=49%
GO:0051172	negative regulation of nitrogen compound metabolic process	6	0.171803	0.397613	1	1	0.990891	9	tags=17%, list=12%, signal=16%	P52176
GO:0051248	negative regulation of protein metabolic process	6	0.171803	0.397613	1	1	0.990891	9	tags=17%, list=12%, signal=16%	P52176
GO:1903510	mucopolysaccharide metabolic process	1	-0.506849	-0.677936	1	1	0.990891	38	tags=100%, list=51%, signal=49%

## Sheet: GO Molecular function
ID	Description	setSize	enrichmentScore	NES	pvalue	p.adjust	qvalues	rank	leading_edge	core_enrichment
GO:0016787	hydrolase activity	4	0.813489	1.66497	0.019826	0.871345	0.871345	12	tags=75%, list=16%, signal=66%	Q8SPP7/P52176/Q58CQ9
GO:0008270	zinc ion binding	2	0.902778	1.46547	0.0298057	0.871345	0.871345	9	tags=100%, list=12%, signal=90%	Q8SPP7/P52176
GO:0008745	N-acetylmuramoyl-L-alanine amidase activity	1	1	1.32932	0.029892	0.871345	0.871345	1	tags=100%, list=1%, signal=100%	Q8SPP7
GO:0042834	peptidoglycan binding	1	1	1.32932	0.029892	0.871345	0.871345	1	tags=100%, list=1%, signal=100%	Q8SPP7
GO:0061783	peptidoglycan muralytic activity	1	1	1.32932	0.029892	0.871345	0.871345	1	tags=100%, list=1%, signal=100%	Q8SPP7
GO:0005539	glycosaminoglycan binding	2	0.876108	1.42218	0.0424662	0.871345	0.871345	1	tags=50%, list=1%, signal=51%	Q8SPP7
GO:0003824	catalytic activity	6	0.646382	1.53354	0.0501452	0.871345	0.871345	16	tags=67%, list=22%, signal=57%	Q8SPP7/P52176/Q58CQ9/Q29437
GO:0016810	hydrolase activity, acting on carbon-nitrogen (but not peptide) bonds	2	0.861111	1.39783	0.0526316	0.871345	0.871345	12	tags=100%, list=16%, signal=86%	Q8SPP7/Q58CQ9
GO:0016811	hydrolase activity, acting on carbon-nitrogen (but not peptide) bonds, in linear amides	2	0.861111	1.39783	0.0526316	0.871345	0.871345	12	tags=100%, list=16%, signal=86%	Q8SPP7/Q58CQ9
GO:0046914	transition metal ion binding	4	0.740785	1.51616	0.0614184	0.891148	0.891148	16	tags=75%, list=22%, signal=62%	Q8SPP7/P52176/Q29437
GO:0016209	antioxidant activity	1	0.945205	1.25648	0.135827	0.891148	0.891148	5	tags=100%, list=7%, signal=95%	Q2TBU0
GO:0030492	hemoglobin binding	1	0.945205	1.25648	0.135827	0.891148	0.891148	5	tags=100%, list=7%, signal=95%	Q2TBU0
GO:0043236	laminin binding	1	-0.931507	-1.22862	0.161943	0.891148	0.891148	7	tags=100%, list=9%, signal=92%
GO:0050840	extracellular matrix binding	1	-0.931507	-1.22862	0.161943	0.891148	0.891148	7	tags=100%, list=9%, signal=92%
GO:0043169	cation binding	8	0.499527	1.29254	0.169492	0.891148	0.891148	16	tags=50%, list=22%, signal=44%	Q8SPP7/P52176/Q3SZV7/Q29437
GO:0046872	metal ion binding	8	0.499527	1.29254	0.169492	0.891148	0.891148	16	tags=50%, list=22%, signal=44%	Q8SPP7/P52176/Q3SZV7/Q29437
GO:0000166	nucleotide binding	3	-0.64178	-1.27618	0.179426	0.891148	0.891148	12	tags=100%, list=16%, signal=87%	P13696/Q9XSG3
GO:1901265	nucleoside phosphate binding	3	-0.64178	-1.27618	0.179426	0.891148	0.891148	12	tags=100%, list=16%, signal=87%	P13696/Q9XSG3
GO:0036094	small molecule binding	4	-0.5554	-1.26995	0.198966	0.891148	0.891148	12	tags=75%, list=16%, signal=66%	P02754/P13696/Q9XSG3
GO:0005092	GDP-dissociation inhibitor activity	1	0.90411	1.20185	0.200787	0.891148	0.891148	8	tags=100%, list=11%, signal=90%	Q9TU03
GO:0005094	Rho GDP-dissociation inhibitor activity	1	0.90411	1.20185	0.200787	0.891148	0.891148	8	tags=100%, list=11%, signal=90%	Q9TU03
GO:0005096	GTPase activator activity	1	0.90411	1.20185	0.200787	0.891148	0.891148	8	tags=100%, list=11%, signal=90%	Q9TU03
GO:0008047	enzyme activator activity	1	0.90411	1.20185	0.200787	0.891148	0.891148	8	tags=100%, list=11%, signal=90%	Q9TU03
GO:0017016	Ras GTPase binding	1	0.90411	1.20185	0.200787	0.891148	0.891148	8	tags=100%, list=11%, signal=90%	Q9TU03
GO:0017048	Rho GTPase binding	1	0.90411	1.20185	0.200787	0.891148	0.891148	8	tags=100%, list=11%, signal=90%	Q9TU03
GO:0030695	GTPase regulator activity	1	0.90411	1.20185	0.200787	0.891148	0.891148	8	tags=100%, list=11%, signal=90%	Q9TU03
GO:0031267	small GTPase binding	1	0.90411	1.20185	0.200787	0.891148	0.891148	8	tags=100%, list=11%, signal=90%	Q9TU03
GO:0048365	Rac GTPase binding	1	0.90411	1.20185	0.200787	0.891148	0.891148	8	tags=100%, list=11%, signal=90%	Q9TU03
GO:0060589	nucleoside-triphosphatase regulator activity	1	0.90411	1.20185	0.200787	0.891148	0.891148	8	tags=100%, list=11%, signal=90%	Q9TU03
GO:0043168	anion binding	4	-0.542857	-1.24127	0.217054	0.891148	0.891148	37	tags=75%, list=50%, signal=40%	Q03247/P02754/P13696
GO:0008289	lipid binding	5	-0.478261	-1.21716	0.221893	0.891148	0.891148	42	tags=80%, list=57%, signal=37%	Q03247/P02754/P10790/P13696
GO:0005509	calcium ion binding	2	-0.724857	-1.22898	0.245413	0.891148	0.891148	7	tags=100%, list=9%, signal=93%	O18738
GO:0000287	magnesium ion binding	1	-0.876712	-1.15634	0.255061	0.891148	0.891148	11	tags=100%, list=15%, signal=86%
GO:0004448	isocitrate dehydrogenase activity	1	-0.876712	-1.15634	0.255061	0.891148	0.891148	11	tags=100%, list=15%, signal=86%
GO:0004450	isocitrate dehydrogenase (NADP+) activity	1	-0.876712	-1.15634	0.255061	0.891148	0.891148	11	tags=100%, list=15%, signal=86%
GO:0016614	oxidoreductase activity, acting on CH-OH group of donors	1	-0.876712	-1.15634	0.255061	0.891148	0.891148	11	tags=100%, list=15%, signal=86%
GO:0016616	oxidoreductase activity, acting on the CH-OH group of donors, NAD or NADP as acceptor	1	-0.876712	-1.15634	0.255061	0.891148	0.891148	11	tags=100%, list=15%, signal=86%
GO:0051287	NAD binding	1	-0.876712	-1.15634	0.255061	0.891148	0.891148	11	tags=100%, list=15%, signal=86%
GO:0051020	GTPase binding	2	0.722169	1.17229	0.25614	0.891148	0.891148	8	tags=50%, list=11%, signal=46%	Q9TU03
GO:0004222	metalloendopeptidase activity	1	0.890411	1.18364	0.259843	0.891148	0.891148	9	tags=100%, list=12%, signal=89%	P52176
GO:0008237	metallopeptidase activity	1	0.890411	1.18364	0.259843	0.891148	0.891148	9	tags=100%, list=12%, signal=89%	P52176
GO:0004175	endopeptidase activity	2	0.712783	1.15705	0.263158	0.891148	0.891148	9	tags=50%, list=12%, signal=45%	P52176
GO:0008233	peptidase activity	2	0.712783	1.15705	0.263158	0.891148	0.891148	9	tags=50%, list=12%, signal=45%	P52176
GO:0140096	catalytic activity, acting on a protein	2	0.712783	1.15705	0.263158	0.891148	0.891148	9	tags=50%, list=12%, signal=45%	P52176
GO:0017159	pantetheine hydrolase activity	1	0.849315	1.12901	0.307087	0.958816	0.958816	12	tags=100%, list=16%, signal=85%	Q58CQ9
GO:0030246	carbohydrate binding	1	-0.821918	-1.08407	0.378543	0.958816	0.958816	15	tags=100%, list=20%, signal=81%
GO:0097159	organic cyclic compound binding	5	-0.405797	-1.03274	0.381657	0.958816	0.958816	47	tags=60%, list=64%, signal=23%	Q0P569/P13696/Q9XSG3
GO:1901363	heterocyclic compound binding	5	-0.405797	-1.03274	0.381657	0.958816	0.958816	47	tags=60%, list=64%, signal=23%	Q0P569/P13696/Q9XSG3
GO:0005102	signaling receptor binding	4	-0.457143	-1.04528	0.382429	0.958816	0.958816	43	tags=100%, list=58%, signal=44%	P15497/O46375/Q03247
GO:0005507	copper ion binding	1	0.794521	1.05617	0.40748	0.958816	0.958816	16	tags=100%, list=22%, signal=79%	Q29437
GO:0008131	primary amine oxidase activity	1	0.794521	1.05617	0.40748	0.958816	0.958816	16	tags=100%, list=22%, signal=79%	Q29437
GO:0015232	heme transmembrane transporter activity	1	0.808219	1.07438	0.40748	0.958816	0.958816	15	tags=100%, list=20%, signal=81%	Q3SZV7
GO:0016638	oxidoreductase activity, acting on the CH-NH2 group of donors	1	0.794521	1.05617	0.40748	0.958816	0.958816	16	tags=100%, list=22%, signal=79%	Q29437
GO:0016641	oxidoreductase activity, acting on the CH-NH2 group of donors, oxygen as acceptor	1	0.794521	1.05617	0.40748	0.958816	0.958816	16	tags=100%, list=22%, signal=79%	Q29437
GO:0022857	transmembrane transporter activity	1	0.808219	1.07438	0.40748	0.958816	0.958816	15	tags=100%, list=20%, signal=81%	Q3SZV7
GO:0048038	quinone binding	1	0.794521	1.05617	0.40748	0.958816	0.958816	16	tags=100%, list=22%, signal=79%	Q29437
GO:0052593	tryptamine:oxygen oxidoreductase (deaminating) activity	1	0.794521	1.05617	0.40748	0.958816	0.958816	16	tags=100%, list=22%, signal=79%	Q29437
GO:0052594	aminoacetone:oxygen oxidoreductase(deaminating) activity	1	0.794521	1.05617	0.40748	0.958816	0.958816	16	tags=100%, list=22%, signal=79%	Q29437
GO:0052595	aliphatic-amine oxidase activity	1	0.794521	1.05617	0.40748	0.958816	0.958816	16	tags=100%, list=22%, signal=79%	Q29437
GO:0052596	phenethylamine:oxygen oxidoreductase (deaminating) activity	1	0.794521	1.05617	0.40748	0.958816	0.958816	16	tags=100%, list=22%, signal=79%	Q29437
GO:0043167	ion binding	12	0.354025	1.01944	0.44021	0.958816	0.958816	16	tags=33%, list=22%, signal=31%	Q8SPP7/P52176/Q3SZV7/Q29437
GO:0097367	carbohydrate derivative binding	5	0.437317	0.977414	0.490964	0.958816	0.958816	1	tags=20%, list=1%, signal=21%	Q8SPP7
GO:0001540	amyloid-beta binding	2	-0.555556	-0.941932	0.516055	0.958816	0.958816	35	tags=100%, list=47%, signal=54%	Q03247
GO:0033218	amide binding	2	-0.555556	-0.941932	0.516055	0.958816	0.958816	35	tags=100%, list=47%, signal=54%	Q03247
GO:0042277	peptide binding	2	-0.555556	-0.941932	0.516055	0.958816	0.958816	35	tags=100%, list=47%, signal=54%	Q03247
GO:0001965	G-protein alpha-subunit binding	1	-0.767123	-1.0118	0.516194	0.958816	0.958816	19	tags=100%, list=26%, signal=75%
GO:0003677	DNA binding	1	-0.767123	-1.0118	0.516194	0.958816	0.958816	19	tags=100%, list=26%, signal=75%
GO:0005085	guanyl-nucleotide exchange factor activity	1	-0.767123	-1.0118	0.516194	0.958816	0.958816	19	tags=100%, list=26%, signal=75%
GO:0030545	receptor regulator activity	3	-0.450704	-0.896228	0.555024	0.958816	0.958816	43	tags=100%, list=58%, signal=44%	P15497/O46375
GO:0030546	signaling receptor activator activity	3	-0.450704	-0.896228	0.555024	0.958816	0.958816	43	tags=100%, list=58%, signal=44%	P15497/O46375
GO:0048018	receptor ligand activity	3	-0.450704	-0.896228	0.555024	0.958816	0.958816	43	tags=100%, list=58%, signal=44%	P15497/O46375
GO:0005524	ATP binding	2	-0.527778	-0.894835	0.571101	0.958816	0.958816	37	tags=100%, list=50%, signal=51%	P13696
GO:0017076	purine nucleotide binding	2	-0.527778	-0.894835	0.571101	0.958816	0.958816	37	tags=100%, list=50%, signal=51%	P13696
GO:0030554	adenyl nucleotide binding	2	-0.527778	-0.894835	0.571101	0.958816	0.958816	37	tags=100%, list=50%, signal=51%	P13696
GO:0032553	ribonucleotide binding	2	-0.527778	-0.894835	0.571101	0.958816	0.958816	37	tags=100%, list=50%, signal=51%	P13696
GO:0032555	purine ribonucleotide binding	2	-0.527778	-0.894835	0.571101	0.958816	0.958816	37	tags=100%, list=50%, signal=51%	P13696
GO:0032559	adenyl ribonucleotide binding	2	-0.527778	-0.894835	0.571101	0.958816	0.958816	37	tags=100%, list=50%, signal=51%	P13696
GO:0035639	purine ribonucleoside triphosphate binding	2	-0.527778	-0.894835	0.571101	0.958816	0.958816	37	tags=100%, list=50%, signal=51%	P13696
GO:0005501	retinoid binding	1	-0.739726	-0.975665	0.587045	0.958816	0.958816	21	tags=100%, list=28%, signal=73%
GO:0005504	fatty acid binding	1	-0.739726	-0.975665	0.587045	0.958816	0.958816	21	tags=100%, list=28%, signal=73%
GO:0019840	isoprenoid binding	1	-0.739726	-0.975665	0.587045	0.958816	0.958816	21	tags=100%, list=28%, signal=73%
GO:0019841	retinol binding	1	-0.739726	-0.975665	0.587045	0.958816	0.958816	21	tags=100%, list=28%, signal=73%
GO:0019842	vitamin binding	1	-0.739726	-0.975665	0.587045	0.958816	0.958816	21	tags=100%, list=28%, signal=73%
GO:0031406	carboxylic acid binding	1	-0.739726	-0.975665	0.587045	0.958816	0.958816	21	tags=100%, list=28%, signal=73%
GO:0033293	monocarboxylic acid binding	1	-0.739726	-0.975665	0.587045	0.958816	0.958816	21	tags=100%, list=28%, signal=73%
GO:0036041	long-chain fatty acid binding	1	-0.739726	-0.975665	0.587045	0.958816	0.958816	21	tags=100%, list=28%, signal=73%
GO:0043177	organic acid binding	1	-0.739726	-0.975665	0.587045	0.958816	0.958816	21	tags=100%, list=28%, signal=73%
GO:0043178	alcohol binding	1	-0.739726	-0.975665	0.587045	0.958816	0.958816	21	tags=100%, list=28%, signal=73%
GO:0008201	heparin binding	1	-0.726027	-0.957597	0.605263	0.958816	0.958816	22	tags=100%, list=30%, signal=71%
GO:0043394	proteoglycan binding	1	-0.726027	-0.957597	0.605263	0.958816	0.958816	22	tags=100%, list=30%, signal=71%
GO:0043395	heparan sulfate proteoglycan binding	1	-0.726027	-0.957597	0.605263	0.958816	0.958816	22	tags=100%, list=30%, signal=71%
GO:0050750	low-density lipoprotein particle receptor binding	1	-0.726027	-0.957597	0.605263	0.958816	0.958816	22	tags=100%, list=30%, signal=71%
GO:0070325	lipoprotein particle receptor binding	1	-0.726027	-0.957597	0.605263	0.958816	0.958816	22	tags=100%, list=30%, signal=71%
GO:1901681	sulfur compound binding	1	-0.726027	-0.957597	0.605263	0.958816	0.958816	22	tags=100%, list=30%, signal=71%
GO:0003674	molecular_function	29	0.253625	0.874607	0.644279	0.958816	0.958816	16	tags=24%, list=22%, signal=31%	Q8SPP7/Q2TBU0/Q9TU03/P52176/Q58CQ9/Q3SZV7/Q29437
GO:0019899	enzyme binding	6	0.366487	0.869491	0.645022	0.958816	0.958816	43	tags=83%, list=58%, signal=38%	Q9TU03/Q7SIH1/P63258/P15497/P28800
GO:0005179	hormone activity	1	-0.69863	-0.921462	0.651822	0.958816	0.958816	24	tags=100%, list=32%, signal=68%
GO:0004857	enzyme inhibitor activity	4	-0.357143	-0.816624	0.664083	0.958816	0.958816	50	tags=50%, list=68%, signal=17%	G8JKW7/P13696
GO:0004866	endopeptidase inhibitor activity	4	-0.357143	-0.816624	0.664083	0.958816	0.958816	50	tags=50%, list=68%, signal=17%	G8JKW7/P13696
GO:0004867	serine-type endopeptidase inhibitor activity	4	-0.357143	-0.816624	0.664083	0.958816	0.958816	50	tags=50%, list=68%, signal=17%	G8JKW7/P13696
GO:0030414	peptidase inhibitor activity	4	-0.357143	-0.816624	0.664083	0.958816	0.958816	50	tags=50%, list=68%, signal=17%	G8JKW7/P13696
GO:0061134	peptidase regulator activity	4	-0.357143	-0.816624	0.664083	0.958816	0.958816	50	tags=50%, list=68%, signal=17%	G8JKW7/P13696
GO:0061135	endopeptidase regulator activity	4	-0.357143	-0.816624	0.664083	0.958816	0.958816	50	tags=50%, list=68%, signal=17%	G8JKW7/P13696
GO:0005515	protein binding	16	0.277266	0.847019	0.669241	0.958816	0.958816	9	tags=19%, list=12%, signal=21%	Q2TBU0/Q9TU03/P52176
GO:0005215	transporter activity	2	0.531624	0.862981	0.696491	0.969405	0.969405	15	tags=50%, list=20%, signal=41%	Q3SZV7
GO:0005488	binding	25	0.24081	0.816095	0.725153	0.969405	0.969405	16	tags=24%, list=22%, signal=28%	Q8SPP7/Q2TBU0/Q9TU03/P52176/Q3SZV7/Q29437
GO:0004252	serine-type endopeptidase activity	1	-0.643836	-0.84919	0.755061	0.969405	0.969405	28	tags=100%, list=38%, signal=63%
GO:0008236	serine-type peptidase activity	1	-0.643836	-0.84919	0.755061	0.969405	0.969405	28	tags=100%, list=38%, signal=63%
GO:0017171	serine hydrolase activity	1	-0.643836	-0.84919	0.755061	0.969405	0.969405	28	tags=100%, list=38%, signal=63%
GO:0003723	RNA binding	1	0.616438	0.819445	0.767717	0.969405	0.969405	29	tags=100%, list=39%, signal=62%	P48616
GO:0003725	double-stranded RNA binding	1	0.616438	0.819445	0.767717	0.969405	0.969405	29	tags=100%, list=39%, signal=62%	P48616
GO:0005198	structural molecule activity	1	0.616438	0.819445	0.767717	0.969405	0.969405	29	tags=100%, list=39%, signal=62%	P48616
GO:0005200	structural constituent of cytoskeleton	1	0.616438	0.819445	0.767717	0.969405	0.969405	29	tags=100%, list=39%, signal=62%	P48616
GO:0005212	structural constituent of eye lens	1	0.616438	0.819445	0.767717	0.969405	0.969405	29	tags=100%, list=39%, signal=62%	P48616
GO:0019215	intermediate filament binding	1	0.616438	0.819445	0.767717	0.969405	0.969405	29	tags=100%, list=39%, signal=62%	P48616
GO:0019904	protein domain specific binding	1	0.616438	0.819445	0.767717	0.969405	0.969405	29	tags=100%, list=39%, signal=62%	P48616
GO:0097110	scaffold protein binding	1	0.616438	0.819445	0.767717	0.969405	0.969405	29	tags=100%, list=39%, signal=62%	P48616
GO:1990254	keratin filament binding	1	0.616438	0.819445	0.767717	0.969405	0.969405	29	tags=100%, list=39%, signal=62%	P48616
GO:0005506	iron ion binding	1	-0.589041	-0.776919	0.84413	0.969877	0.969877	32	tags=100%, list=43%, signal=58%
GO:0008199	ferric iron binding	1	-0.589041	-0.776919	0.84413	0.969877	0.969877	32	tags=100%, list=43%, signal=58%
GO:0042803	protein homodimerization activity	1	-0.575342	-0.758851	0.860324	0.969877	0.969877	33	tags=100%, list=45%, signal=56%
GO:0046983	protein dimerization activity	1	-0.575342	-0.758851	0.860324	0.969877	0.969877	33	tags=100%, list=45%, signal=56%
GO:0044877	protein-containing complex binding	2	0.458333	0.744009	0.873684	0.969877	0.969877	41	tags=100%, list=55%, signal=46%	P48616/P15497
GO:0005125	cytokine activity	1	0.561644	0.746606	0.883858	0.969877	0.969877	33	tags=100%, list=45%, signal=56%	O77482
GO:0005126	cytokine receptor binding	1	0.561644	0.746606	0.883858	0.969877	0.969877	33	tags=100%, list=45%, signal=56%	O77482
GO:0005149	interleukin-1 receptor binding	1	0.561644	0.746606	0.883858	0.969877	0.969877	33	tags=100%, list=45%, signal=56%	O77482
GO:0070851	growth factor receptor binding	1	0.561644	0.746606	0.883858	0.969877	0.969877	33	tags=100%, list=45%, signal=56%	O77482
GO:0001530	lipopolysaccharide binding	1	0.547945	0.728396	0.909449	0.969877	0.969877	34	tags=100%, list=46%, signal=55%	Q2TBI0
GO:0002020	protease binding	2	0.430556	0.698917	0.915789	0.969877	0.969877	43	tags=100%, list=58%, signal=43%	Q7SIH1/P28800
GO:0005319	lipid transporter activity	1	-0.547945	-0.722715	0.919028	0.969877	0.969877	35	tags=100%, list=47%, signal=53%
GO:0008035	high-density lipoprotein particle binding	1	-0.547945	-0.722715	0.919028	0.969877	0.969877	35	tags=100%, list=47%, signal=53%
GO:0015248	sterol transporter activity	1	-0.547945	-0.722715	0.919028	0.969877	0.969877	35	tags=100%, list=47%, signal=53%
GO:0031072	heat shock protein binding	1	-0.547945	-0.722715	0.919028	0.969877	0.969877	35	tags=100%, list=47%, signal=53%
GO:0034190	apolipoprotein receptor binding	1	-0.547945	-0.722715	0.919028	0.969877	0.969877	35	tags=100%, list=47%, signal=53%
GO:0034191	apolipoprotein A-I receptor binding	1	-0.547945	-0.722715	0.919028	0.969877	0.969877	35	tags=100%, list=47%, signal=53%
GO:0045499	chemorepellent activity	1	-0.547945	-0.722715	0.919028	0.969877	0.969877	35	tags=100%, list=47%, signal=53%
GO:0071813	lipoprotein particle binding	1	-0.547945	-0.722715	0.919028	0.969877	0.969877	35	tags=100%, list=47%, signal=53%
GO:0071814	protein-lipid complex binding	1	-0.547945	-0.722715	0.919028	0.969877	0.969877	35	tags=100%, list=47%, signal=53%
GO:0120013	lipid transfer activity	1	-0.547945	-0.722715	0.919028	0.969877	0.969877	35	tags=100%, list=47%, signal=53%
GO:0120015	sterol transfer activity	1	-0.547945	-0.722715	0.919028	0.969877	0.969877	35	tags=100%, list=47%, signal=53%
GO:0120020	cholesterol transfer activity	1	-0.547945	-0.722715	0.919028	0.969877	0.969877	35	tags=100%, list=47%, signal=53%
GO:0003676	nucleic acid binding	2	-0.388889	-0.659352	0.924312	0.969877	0.969877	47	tags=50%, list=64%, signal=19%	Q0P569
GO:0042802	identical protein binding	8	0.227273	0.588073	0.939266	0.978675	0.978675	59	tags=100%, list=80%, signal=23%	P52176/P48616/P63258/P15497/P28800/Q03247/P02754/P80195
GO:0005522	profilin binding	1	-0.520548	-0.686579	0.977733	0.992234	0.992234	37	tags=100%, list=50%, signal=51%
GO:0031625	ubiquitin protein ligase binding	1	-0.520548	-0.686579	0.977733	0.992234	0.992234	37	tags=100%, list=50%, signal=51%
GO:0044389	ubiquitin-like protein ligase binding	1	-0.520548	-0.686579	0.977733	0.992234	0.992234	37	tags=100%, list=50%, signal=51%
GO:0030234	enzyme regulator activity	5	0.23179	0.518056	0.978916	0.992234	0.992234	8	tags=20%, list=11%, signal=19%	Q9TU03
GO:0016491	oxidoreductase activity	2	0.343538	0.557663	0.991228	0.997222	0.997222	16	tags=50%, list=22%, signal=40%	Q29437
GO:0098772	molecular function regulator	9	0.169136	0.451665	0.997222	0.997222	0.997222	41	tags=56%, list=55%, signal=28%	Q9TU03/Q7SIH1/O77482/Q3T052/P15497

## Sheet: GO Cellular componenet
ID	Description	setSize	enrichmentScore	NES	pvalue	p.adjust	qvalues	rank	leading_edge	core_enrichment
GO:0016021	integral component of membrane	4	-0.842857	-1.8716	0.00555532	0.339121	0.324186	16	tags=100%, list=22%, signal=83%	Q8WML4/O18738/P26201
GO:0005737	cytoplasm	13	-0.481304	-1.73565	0.00842405	0.339121	0.324186	15	tags=54%, list=20%, signal=52%	Q3MHX6/P10790/Q8WML4/P13696/Q9XSG3/O18738/P26201
GO:0005622	intracellular	16	-0.434223	-1.70491	0.0145159	0.339121	0.324186	15	tags=50%, list=20%, signal=51%	Q3MHX6/P10790/Q8WML4/P13696/Q9XSG3/Q9TUM6/O18738/P26201
GO:0098590	plasma membrane region	2	-0.944444	-1.56612	0.0165511	0.339121	0.324186	7	tags=100%, list=9%, signal=93%	P26201
GO:0043231	intracellular membrane-bounded organelle	7	-0.636077	-1.81247	0.0173021	0.339121	0.324186	19	tags=86%, list=26%, signal=70%	Q0P569/Q3MHX6/P10790/Q8WML4/O18738/P26201
GO:0043227	membrane-bounded organelle	10	-0.469912	-1.524	0.0328193	0.363236	0.347239	19	tags=60%, list=26%, signal=52%	Q0P569/Q3MHX6/P10790/Q8WML4/O18738/P26201
GO:0043226	organelle	12	-0.455655	-1.58999	0.0332119	0.363236	0.347239	15	tags=58%, list=20%, signal=56%	Q0P569/Q3MHX6/P10790/Q8WML4/Q9TUM6/O18738/P26201
GO:0043229	intracellular organelle	12	-0.455655	-1.58999	0.0332119	0.363236	0.347239	15	tags=58%, list=20%, signal=56%	Q0P569/Q3MHX6/P10790/Q8WML4/Q9TUM6/O18738/P26201
GO:0012505	endomembrane system	4	-0.714286	-1.5861	0.0333584	0.363236	0.347239	25	tags=100%, list=34%, signal=70%	Q0P569/Q3MHX6/P26201
GO:0031224	intrinsic component of membrane	5	-0.571572	-1.39482	0.104478	0.708845	0.677629	16	tags=80%, list=22%, signal=67%	P81265/Q8WML4/O18738/P26201
GO:0016020	membrane	11	-0.411361	-1.38898	0.112314	0.708845	0.677629	19	tags=64%, list=26%, signal=56%	Q0P569/P80195/P81265/Q8WML4/Q9TUM6/O18738/P26201
GO:0005903	brush border	1	-0.945205	-1.2355	0.172131	0.708845	0.677629	6	tags=100%, list=8%, signal=93%
GO:0016324	apical plasma membrane	1	-0.945205	-1.2355	0.172131	0.708845	0.677629	6	tags=100%, list=8%, signal=93%
GO:0031253	cell projection membrane	1	-0.945205	-1.2355	0.172131	0.708845	0.677629	6	tags=100%, list=8%, signal=93%
GO:0031526	brush border membrane	1	-0.945205	-1.2355	0.172131	0.708845	0.677629	6	tags=100%, list=8%, signal=93%
GO:0045121	membrane raft	1	-0.945205	-1.2355	0.172131	0.708845	0.677629	6	tags=100%, list=8%, signal=93%
GO:0045177	apical part of cell	1	-0.945205	-1.2355	0.172131	0.708845	0.677629	6	tags=100%, list=8%, signal=93%
GO:0098589	membrane region	1	-0.945205	-1.2355	0.172131	0.708845	0.677629	6	tags=100%, list=8%, signal=93%
GO:0098805	whole membrane	1	-0.945205	-1.2355	0.172131	0.708845	0.677629	6	tags=100%, list=8%, signal=93%
GO:0098857	membrane microdomain	1	-0.945205	-1.2355	0.172131	0.708845	0.677629	6	tags=100%, list=8%, signal=93%
GO:0098862	cluster of actin-based cell projections	1	-0.945205	-1.2355	0.172131	0.708845	0.677629	6	tags=100%, list=8%, signal=93%
GO:0005654	nucleoplasm	1	-0.931507	-1.21759	0.192623	0.708845	0.677629	7	tags=100%, list=9%, signal=92%
GO:0045202	synapse	1	-0.931507	-1.21759	0.192623	0.708845	0.677629	7	tags=100%, list=9%, signal=92%
GO:0045211	postsynaptic membrane	1	-0.931507	-1.21759	0.192623	0.708845	0.677629	7	tags=100%, list=9%, signal=92%
GO:0097060	synaptic membrane	1	-0.931507	-1.21759	0.192623	0.708845	0.677629	7	tags=100%, list=9%, signal=92%
GO:0098794	postsynapse	1	-0.931507	-1.21759	0.192623	0.708845	0.677629	7	tags=100%, list=9%, signal=92%
GO:0005794	Golgi apparatus	2	-0.777778	-1.28975	0.195294	0.708845	0.677629	19	tags=100%, list=26%, signal=76%	P26201
GO:0032991	protein-containing complex	7	-0.41791	-1.19082	0.240803	0.842809	0.805693	47	tags=100%, list=64%, signal=40%	A4IFB6/P15497/P28800/Q2KIT0/Q2KIU3/Q03247
GO:0031012	extracellular matrix	2	0.71357	1.13009	0.261618	0.874857	0.836329	9	tags=50%, list=12%, signal=45%	P52176
GO:0005811	lipid droplet	1	-0.890411	-1.16387	0.286885	0.874857	0.836329	10	tags=100%, list=14%, signal=88%
GO:0031974	membrane-enclosed lumen	4	-0.51412	-1.14162	0.294595	0.874857	0.836329	15	tags=75%, list=20%, signal=63%	Q3MHX6/P10790/O18738
GO:0043233	organelle lumen	4	-0.51412	-1.14162	0.294595	0.874857	0.836329	15	tags=75%, list=20%, signal=63%	Q3MHX6/P10790/O18738
GO:0070013	intracellular organelle lumen	4	-0.51412	-1.14162	0.294595	0.874857	0.836329	15	tags=75%, list=20%, signal=63%	Q3MHX6/P10790/O18738
GO:0031225	anchored component of membrane	1	0.849315	1.11667	0.319066	0.919661	0.879161	12	tags=100%, list=16%, signal=85%	Q58CQ9
GO:0005576	extracellular region	20	0.337565	1.08307	0.380299	0.960457	0.91816	16	tags=25%, list=22%, signal=27%	Q8SPP7/P52176/Q0VCG9/Q28085/Q29437
GO:0005739	mitochondrion	1	-0.835616	-1.09225	0.381148	0.960457	0.91816	14	tags=100%, list=19%, signal=82%
GO:0005759	mitochondrial matrix	1	-0.835616	-1.09225	0.381148	0.960457	0.91816	14	tags=100%, list=19%, signal=82%
GO:0005634	nucleus	3	-0.527803	-1.04304	0.381313	0.960457	0.91816	13	tags=67%, list=18%, signal=57%	Q8WML4/O18738
GO:0005783	endoplasmic reticulum	1	-0.821918	-1.07434	0.413934	0.960457	0.91816	15	tags=100%, list=20%, signal=81%
GO:0005788	endoplasmic reticulum lumen	1	-0.821918	-1.07434	0.413934	0.960457	0.91816	15	tags=100%, list=20%, signal=81%
GO:0005581	collagen trimer	2	-0.625	-1.03641	0.449412	0.960457	0.91816	30	tags=100%, list=41%, signal=61%	Q2KIU3
GO:0030054	cell junction	2	-0.58613	-0.97195	0.489412	0.960457	0.91816	7	tags=100%, list=9%, signal=93%	O18738
GO:0043228	non-membrane-bounded organelle	5	-0.391304	-0.954909	0.501493	0.960457	0.91816	48	tags=100%, list=65%, signal=38%	P48616/P63258/Q9TUM6/O18738
GO:0043232	intracellular non-membrane-bounded organelle	5	-0.391304	-0.954909	0.501493	0.960457	0.91816	48	tags=100%, list=65%, signal=38%	P48616/P63258/Q9TUM6/O18738
GO:0005886	plasma membrane	6	-0.34036	-0.912383	0.52439	0.960457	0.91816	7	tags=50%, list=9%, signal=49%	P81265/O18738/P26201
GO:0071944	cell periphery	6	-0.34036	-0.912383	0.52439	0.960457	0.91816	7	tags=50%, list=9%, signal=49%	P81265/O18738/P26201
GO:0032994	protein-lipid complex	2	-0.555556	-0.92125	0.548235	0.960457	0.91816	35	tags=100%, list=47%, signal=54%	Q03247
GO:0034358	plasma lipoprotein particle	2	-0.555556	-0.92125	0.548235	0.960457	0.91816	35	tags=100%, list=47%, signal=54%	Q03247
GO:0034361	very-low-density lipoprotein particle	2	-0.555556	-0.92125	0.548235	0.960457	0.91816	35	tags=100%, list=47%, signal=54%	Q03247
GO:0034364	high-density lipoprotein particle	2	-0.555556	-0.92125	0.548235	0.960457	0.91816	35	tags=100%, list=47%, signal=54%	Q03247
GO:0034385	triglyceride-rich plasma lipoprotein particle	2	-0.555556	-0.92125	0.548235	0.960457	0.91816	35	tags=100%, list=47%, signal=54%	Q03247
GO:1990777	lipoprotein particle	2	-0.555556	-0.92125	0.548235	0.960457	0.91816	35	tags=100%, list=47%, signal=54%	Q03247
GO:0031982	vesicle	4	-0.4	-0.888217	0.594595	0.960457	0.91816	47	tags=100%, list=64%, signal=39%	P63258/P15497/G8JKW7
GO:0034362	low-density lipoprotein particle	1	-0.726027	-0.949004	0.604508	0.960457	0.91816	22	tags=100%, list=30%, signal=71%
GO:0034363	intermediate-density lipoprotein particle	1	-0.726027	-0.949004	0.604508	0.960457	0.91816	22	tags=100%, list=30%, signal=71%
GO:0042627	chylomicron	1	-0.726027	-0.949004	0.604508	0.960457	0.91816	22	tags=100%, list=30%, signal=71%
GO:0005856	cytoskeleton	4	-0.385714	-0.856495	0.62973	0.960457	0.91816	48	tags=100%, list=65%, signal=37%	P48616/P63258/O18738
GO:0005615	extracellular space	9	0.336631	0.88024	0.646492	0.960457	0.91816	44	tags=78%, list=59%, signal=36%	P52176/Q29437/Q2TBI0/P63258/P15497/P28800/Q29443
GO:0030141	secretory granule	1	-0.684932	-0.895286	0.684426	0.960457	0.91816	25	tags=100%, list=34%, signal=67%
GO:0042583	chromaffin granule	1	-0.684932	-0.895286	0.684426	0.960457	0.91816	25	tags=100%, list=34%, signal=67%
GO:0099503	secretory vesicle	1	-0.684932	-0.895286	0.684426	0.960457	0.91816	25	tags=100%, list=34%, signal=67%
GO:0042995	cell projection	2	-0.475128	-0.78788	0.745882	0.960457	0.91816	6	tags=50%, list=8%, signal=47%	P26201
GO:0120025	plasma membrane bounded cell projection	2	-0.475128	-0.78788	0.745882	0.960457	0.91816	6	tags=50%, list=8%, signal=47%	P26201
GO:0031410	cytoplasmic vesicle	3	-0.394366	-0.77934	0.765152	0.960457	0.91816	47	tags=100%, list=64%, signal=38%	P15497/G8JKW7
GO:0097708	intracellular vesicle	3	-0.394366	-0.77934	0.765152	0.960457	0.91816	47	tags=100%, list=64%, signal=38%	P15497/G8JKW7
GO:0005777	peroxisome	1	0.616438	0.810483	0.784047	0.960457	0.91816	29	tags=100%, list=39%, signal=62%	P48616
GO:0005844	polysome	1	0.616438	0.810483	0.784047	0.960457	0.91816	29	tags=100%, list=39%, signal=62%	P48616
GO:0005882	intermediate filament	1	0.616438	0.810483	0.784047	0.960457	0.91816	29	tags=100%, list=39%, signal=62%	P48616
GO:0016363	nuclear matrix	1	0.616438	0.810483	0.784047	0.960457	0.91816	29	tags=100%, list=39%, signal=62%	P48616
GO:0031252	cell leading edge	1	0.616438	0.810483	0.784047	0.960457	0.91816	29	tags=100%, list=39%, signal=62%	P48616
GO:0034399	nuclear periphery	1	0.616438	0.810483	0.784047	0.960457	0.91816	29	tags=100%, list=39%, signal=62%	P48616
GO:0042579	microbody	1	0.616438	0.810483	0.784047	0.960457	0.91816	29	tags=100%, list=39%, signal=62%	P48616
GO:0043005	neuron projection	1	0.616438	0.810483	0.784047	0.960457	0.91816	29	tags=100%, list=39%, signal=62%	P48616
GO:0045111	intermediate filament cytoskeleton	1	0.616438	0.810483	0.784047	0.960457	0.91816	29	tags=100%, list=39%, signal=62%	P48616
GO:0045335	phagocytic vesicle	1	0.616438	0.810483	0.784047	0.960457	0.91816	29	tags=100%, list=39%, signal=62%	P48616
GO:0099080	supramolecular complex	1	0.616438	0.810483	0.784047	0.960457	0.91816	29	tags=100%, list=39%, signal=62%	P48616
GO:0099081	supramolecular polymer	1	0.616438	0.810483	0.784047	0.960457	0.91816	29	tags=100%, list=39%, signal=62%	P48616
GO:0099512	supramolecular fiber	1	0.616438	0.810483	0.784047	0.960457	0.91816	29	tags=100%, list=39%, signal=62%	P48616
GO:0099513	polymeric cytoskeletal fiber	1	0.616438	0.810483	0.784047	0.960457	0.91816	29	tags=100%, list=39%, signal=62%	P48616
GO:1990904	ribonucleoprotein complex	1	0.616438	0.810483	0.784047	0.960457	0.91816	29	tags=100%, list=39%, signal=62%	P48616
GO:0031981	nuclear lumen	2	-0.454454	-0.753598	0.816471	0.983607	0.94029	7	tags=50%, list=9%, signal=47%	O18738
GO:0030014	CCR4-NOT complex	1	0.575342	0.756451	0.846304	0.983607	0.94029	32	tags=100%, list=43%, signal=58%	A4IFB6
GO:0005577	fibrinogen complex	1	-0.575342	-0.752041	0.870902	0.983607	0.94029	33	tags=100%, list=45%, signal=56%
GO:0009986	cell surface	1	-0.575342	-0.752041	0.870902	0.983607	0.94029	33	tags=100%, list=45%, signal=56%
GO:0030139	endocytic vesicle	2	0.458333	0.72587	0.89673	0.983607	0.94029	41	tags=100%, list=55%, signal=46%	P48616/P15497
GO:0034366	spherical high-density lipoprotein particle	1	-0.547945	-0.716229	0.911885	0.983607	0.94029	35	tags=100%, list=47%, signal=53%
GO:0110165	cellular anatomical entity	33	0.172052	0.596202	0.930506	0.983607	0.94029	16	tags=21%, list=22%, signal=30%	Q8SPP7/Q9TU03/P52176/Q0VCG9/Q58CQ9/Q28085/Q29437
GO:0005829	cytosol	3	0.331844	0.605186	0.960461	0.983607	0.94029	29	tags=67%, list=39%, signal=42%	Q9TU03/P48616
GO:0005575	cellular_component	34	0.15231	0.531847	0.969519	0.983607	0.94029	16	tags=21%, list=22%, signal=30%	Q8SPP7/Q9TU03/P52176/Q0VCG9/Q58CQ9/Q28085/Q29437
GO:0005911	cell-cell junction	1	-0.520548	-0.680418	0.983607	0.983607	0.94029	37	tags=100%, list=50%, signal=51%
GO:0005925	focal adhesion	1	-0.520548	-0.680418	0.983607	0.983607	0.94029	37	tags=100%, list=50%, signal=51%
GO:0030055	cell-substrate junction	1	-0.520548	-0.680418	0.983607	0.983607	0.94029	37	tags=100%, list=50%, signal=51%
GO:0043230	extracellular organelle	1	-0.520548	-0.680418	0.983607	0.983607	0.94029	37	tags=100%, list=50%, signal=51%
GO:0043296	apical junction complex	1	-0.520548	-0.680418	0.983607	0.983607	0.94029	37	tags=100%, list=50%, signal=51%
GO:0070062	extracellular exosome	1	-0.520548	-0.680418	0.983607	0.983607	0.94029	37	tags=100%, list=50%, signal=51%
GO:0070161	anchoring junction	1	-0.520548	-0.680418	0.983607	0.983607	0.94029	37	tags=100%, list=50%, signal=51%
GO:0097433	dense body	1	-0.520548	-0.680418	0.983607	0.983607	0.94029	37	tags=100%, list=50%, signal=51%
GO:1903561	extracellular vesicle	1	-0.520548	-0.680418	0.983607	0.983607	0.94029	37	tags=100%, list=50%, signal=51%
