# Supplementary material for: Development of a bioinformatics platform for analysis of quantitative transcriptomics and proteomics data: the OMnalysis
Source: PeerJ. 2021 Nov 9;9:e12415. doi: 10.7717/peerj.12415 (PMC8588854; doi:10.7717/peerj.12415)
Supplement: Supplemental Information 13 [file peerj-09-12415-s013.xlsx]

## Sheet: ORA pathway treatment 1
ID	Description	GeneRatio	BgRatio	pvalue	p.adjust	qvalue	geneID	Count
hsa04668	TNF signaling pathway	26/159	112/8111	2.42724e-21	5.87392e-19	4.34348e-19	6376/6401/330/7185/2920/3383/4792/182/6347/4790/6364/7128/6372/3659/3553/3569/7412/2921/6374/2919/3627/3726/1435/4049/7124/6352	26
hsa04064	NF-kappa B signaling pathway	22/159	104/8111	3.04296e-17	3.68198e-15	2.72265e-15	330/7185/4791/2920/1540/3383/4792/10673/5971/23586/4790/7128/5328/3553/7412/2921/2919/3576/4049/4050/7124/4067	22
hsa05323	Rheumatoid arthritis	19/159	93/8111	1.0035e-14	8.09494e-13	5.98582e-13	2920/3383/10673/6347/51561/3552/6364/6372/3553/3569/7097/2921/6374/2919/3576/1435/4050/7124/6352	19
hsa04060	Cytokine-cytokine receptor interaction	30/159	295/8111	5.19193e-14	3.14112e-12	2.32271e-12	6376/9235/2920/10673/1440/6347/51561/3552/6364/8743/3624/6372/3553/9518/3569/3557/27242/11009/2921/6374/2919/3575/3627/6373/3576/1435/4049/4050/7124/6352	30
hsa04657	IL-17 signaling pathway	18/159	94/8111	1.73666e-13	8.40544e-12	6.21542e-12	2920/4792/1440/6347/4790/6364/7128/6372/3553/3569/2921/6374/2919/3627/3576/8061/7124/9641	18
hsa04061	Viral protein interaction with cytokine and cytokine receptor	18/159	100/8111	5.34739e-13	2.15678e-11	1.59483e-11	6376/2920/6347/6364/8743/6372/3569/11009/2921/6374/2919/3627/6373/3576/1435/4049/7124/6352	18
hsa04621	NOD-like receptor signaling pathway	22/159	181/8111	4.86464e-12	1.68178e-10	1.24359e-10	330/2920/5027/4792/8767/10135/6347/4790/2635/2633/7128/3553/3569/115362/2634/115361/2921/2919/3576/7124/9641/6352	22
hsa05417	Lipid and atherosclerosis	22/159	215/8111	1.51931e-10	4.59592e-09	3.39846e-09	6401/5452/2920/3383/4792/6347/4790/6648/8743/3553/3949/3569/7097/7412/2921/2919/3576/2081/7124/4067/9641/6352	22
hsa05134	Legionellosis	12/159	57/8111	7.01367e-10	1.8859e-08	1.39453e-08	4791/2920/4792/4790/3553/718/3569/7097/2921/2919/3576/7124	12
hsa05133	Pertussis	13/159	76/8111	2.02838e-09	4.90868e-08	3.62974e-08	4790/51561/3552/6372/3659/3553/718/3569/715/6374/3576/716/7124	13
hsa05144	Malaria	11/159	50/8111	2.24463e-09	4.93819e-08	3.65156e-08	6401/3383/1440/6347/3553/3569/7097/7057/7412/3576/7124	11
hsa05169	Epstein-Barr virus infection	19/159	202/8111	1.22573e-08	2.47188e-07	1.82784e-07	1870/960/4791/3383/4792/5971/3718/23586/4790/7128/3569/7097/4794/10018/3627/3134/7124/4067/9641	19
hsa05164	Influenza A	16/159	172/8111	2.18511e-07	4.06767e-06	3.00785e-06	3383/4792/23586/6347/4790/3552/64135/8743/3553/3569/3627/3576/4600/7124/9641/6352	16
hsa04625	C-type lectin receptor signaling pathway	12/159	104/8111	7.746e-07	1.33895e-05	9.90091e-06	4791/1540/4792/5971/4790/51561/3659/3553/3569/26253/7124/9641	12
hsa04622	RIG-I-like receptor signaling pathway	10/159	70/8111	9.11511e-07	1.47057e-05	1.08742e-05	1540/4792/23586/79132/4790/64135/3627/3576/7124/9641	10
hsa04062	Chemokine signaling pathway	16/159	192/8111	9.78483e-07	1.47995e-05	1.09436e-05	6376/2920/4792/3718/6347/4790/6364/6372/2921/6374/2919/3627/6373/3576/4067/6352	16
hsa05171	Coronavirus disease - COVID-19	17/159	232/8111	2.65111e-06	3.77394e-05	2.79065e-05	4792/23586/1440/6347/4790/64135/3553/718/3569/7097/715/3627/3576/716/4600/7124/9641	17
hsa05146	Amoebiasis	11/159	102/8111	4.45212e-06	5.98563e-05	4.42609e-05	3918/2920/4790/3553/3569/7097/2921/2919/3576/3914/7124	11
hsa04620	Toll-like receptor signaling pathway	11/159	104/8111	5.3892e-06	6.86414e-05	5.0757e-05	4792/4790/3553/3569/7097/3627/6373/3576/7124/9641/6352	11
hsa05162	Measles	12/159	139/8111	1.65318e-05	0.000200034	0.000147916	4792/3718/23586/4790/3552/64135/7128/3553/3569/7097/4600/9641	12
hsa04640	Hematopoietic cell lineage	10/159	99/8111	2.19878e-05	0.000252775	0.000186915	960/4254/1440/3552/3553/3569/3673/3575/1435/7124	10
hsa05167	Kaposi sarcoma-associated herpesvirus infection	14/159	193/8111	2.3741e-05	0.000252775	0.000186915	1870/2920/3383/285/4792/4790/718/3569/2921/2919/3576/3134/4067/9641	14
hsa04933	AGE-RAGE signaling pathway in diabetic complications	10/159	100/8111	2.40241e-05	0.000252775	0.000186915	6401/3383/6347/4790/3552/3553/3569/7412/3576/7124	10
hsa04623	Cytosolic DNA-sensing pathway	8/159	63/8111	2.83561e-05	0.000276715	0.000204618	4792/23586/4790/3553/3569/3627/9641/6352	8
hsa05142	Chagas disease	10/159	102/8111	2.85863e-05	0.000276715	0.000204618	4792/6347/4790/3553/718/3569/7097/3576/7124/6352	10
hsa04380	Osteoclast differentiation	11/159	128/8111	3.92409e-05	0.000365242	0.000270079	4791/1540/4792/5971/4790/3552/3553/3726/8061/1435/7124	11
hsa05120	Epithelial cell signaling in Helicobacter pylori infection	8/159	70/8111	6.15427e-05	0.000551605	0.000407885	2920/4792/4790/2921/2919/3576/4067/6352	8
hsa05143	African trypanosomiasis	6/159	37/8111	7.25887e-05	0.000627374	0.000463913	6401/3383/3553/3569/7412/7124	6
hsa05166	Human T-cell leukemia virus 1 infection	14/159	219/8111	9.51207e-05	0.000793766	0.000586952	1870/4791/3383/4792/5971/3718/4790/2113/3569/4487/8061/3134/4049/7124	14
hsa04151	PI3K-Akt signaling pathway	18/159	354/8111	0.000185197	0.00149392	0.00110468	4254/3918/285/3718/1440/4790/3791/3569/7097/7057/2250/56034/10018/3673/3575/3667/1435/3914	18
hsa04010	MAPK signaling pathway	16/159	294/8111	0.000199597	0.00155815	0.00115217	4254/4791/285/5971/8605/4790/5924/3552/1846/3553/3791/2250/773/56034/1435/7124	16
hsa05152	Tuberculosis	12/159	180/8111	0.000206228	0.0015596	0.00115325	8767/4790/51561/3552/3553/718/3656/3569/7097/1520/26253/7124	12
hsa05160	Hepatitis C	11/159	157/8111	0.000247568	0.0018155	0.00134247	1870/4792/23586/4790/3949/23562/9076/3627/4600/7124/9641	11
hsa05321	Inflammatory bowel disease	7/159	65/8111	0.000261337	0.0018601	0.00137546	4790/51561/3552/3553/3569/7097/7124	7
hsa05161	Hepatitis B	11/159	162/8111	0.000324995	0.00224711	0.00166163	1870/4792/3718/23586/4790/64135/3569/7097/3576/7124/9641	11
hsa05418	Fluid shear stress and atherosclerosis	10/159	139/8111	0.000384491	0.00258464	0.00191121	6401/3383/5327/6347/4790/3552/3553/3791/7412/7124	10
hsa05222	Small cell lung cancer	8/159	92/8111	0.000421625	0.00275766	0.00203915	1870/330/7185/3918/4792/4790/3673/3914	8
hsa00330	Arginine and proline metabolism	6/159	51/8111	0.00044851	0.0028563	0.0021121	51056/54498/4953/6303/55748/4128	6
hsa04014	Ras signaling pathway	13/159	232/8111	0.000611381	0.0037937	0.00280526	5898/4254/285/8605/4790/5924/3791/2113/9771/2250/51365/56034/1435	13
hsa05140	Leishmaniasis	7/159	77/8111	0.000741886	0.00448841	0.00331896	4792/4790/3552/3553/718/7097/7124	7
hsa05332	Graft-versus-host disease	5/159	42/8111	0.00128718	0.00759752	0.005618	3552/3553/3569/3134/7124	5
hsa05202	Transcriptional misregulation in cancer	11/159	192/8111	0.00134526	0.00768798	0.00568489	51513/330/7185/5327/4790/7704/5328/3569/64332/8091/3576	11
hsa04210	Apoptosis	9/159	136/8111	0.00136605	0.00768798	0.00568489	330/7185/4792/4790/8743/10018/1520/2081/7124	9
hsa04940	Type I diabetes mellitus	5/159	43/8111	0.00143382	0.00788601	0.00583132	3552/3553/3134/4049/7124	5
hsa05145	Toxoplasmosis	8/159	112/8111	0.00154868	0.00832848	0.00615851	330/3918/4792/4790/3949/7097/3914/7124	8
hsa04350	TGF-beta signaling pathway	7/159	94/8111	0.00239367	0.0125928	0.00931175	3624/3397/10468/7057/4091/26585/7124	7
hsa04015	Rap1 signaling pathway	11/159	210/8111	0.00273515	0.0140831	0.0104138	5898/4254/285/3397/3791/9732/9771/7057/2250/56034/1435	11
hsa05215	Prostate cancer	7/159	97/8111	0.00286111	0.0144248	0.0106664	1870/4792/5327/4790/5328/56034/4824	7
hsa01523	Antifolate resistance	4/159	31/8111	0.00296162	0.0146268	0.0108158	4790/3553/3569/7124	4
hsa04932	Non-alcoholic fatty liver disease	9/159	155/8111	0.00334591	0.0161942	0.0119748	4790/3552/3553/3569/10018/3667/3576/2081/7124	9
hsa04217	Necroptosis	9/159	159/8111	0.00396274	0.0188036	0.0139044	330/1540/8605/3718/3552/7128/8743/3553/7124	9
hsa05163	Human cytomegalovirus infection	11/159	225/8111	0.00462848	0.0215402	0.015928	6376/1870/4792/6347/4790/3553/3569/3576/3134/7124/6352	11
hsa04659	Th17 cell differentiation	7/159	107/8111	0.00493759	0.0225452	0.0166711	4792/3718/4790/51561/3553/3569/4794	7
hsa05130	Pathogenic Escherichia coli infection	10/159	197/8111	0.00527522	0.0236408	0.0174812	4792/4790/8743/3553/4430/3569/23562/9076/3576/7124	10
hsa04610	Complement and coagulation cascades	6/159	85/8111	0.00631455	0.027784	0.020545	5329/5327/5328/718/715/716	6
hsa04512	ECM-receptor interaction	6/159	88/8111	0.00745921	0.0322345	0.0238358	960/3918/7057/3673/961/3914	6
hsa05219	Bladder cancer	4/159	41/8111	0.00819375	0.0347875	0.0257237	1870/1890/7057/3576	4
hsa05132	Salmonella infection	11/159	249/8111	0.00968659	0.0404165	0.029886	5898/330/4792/8767/4790/8743/3553/3569/7097/3576/7124	11
hsa04920	Adipocytokine signaling pathway	5/159	69/8111	0.0111487	0.0457288	0.0338142	4792/4790/4794/3667/7124	5
hsa05135	Yersinia infection	7/159	137/8111	0.0179454	0.0723799	0.0535215	4792/6347/4790/3553/3569/3576/7124	7
hsa05203	Viral carcinogenesis	9/159	204/8111	0.0187308	0.0743093	0.0549481	9734/7185/4791/4792/3718/4790/718/3134/4067	9
hsa05131	Shigellosis	10/159	246/8111	0.0226342	0.0883464	0.0653279	960/4792/8767/4790/3553/718/10318/3576/7124/6352	10
hsa05165	Human papillomavirus infection	12/159	331/8111	0.0291139	0.110424	0.0816531	3918/182/4790/3659/8638/7057/3673/4600/3914/3134/7124/9641	12
hsa04722	Neurotrophin signaling pathway	6/159	119/8111	0.0292365	0.110424	0.0816531	4792/8767/4790/3656/4794/3667	6
hsa04145	Phagosome	7/159	152/8111	0.0296593	0.110424	0.0816531	718/7097/7057/715/1520/3673/3134	7
hsa05235	PD-L1 expression and PD-1 checkpoint pathway in cancer	5/159	89/8111	0.0302243	0.110822	0.0819478	4792/4790/7097/4794/116071	5
hsa04218	Cellular senescence	7/159	156/8111	0.0334927	0.120974	0.0894542	1870/4790/3552/2113/3569/3576/3134	7
hsa04658	Th1 and Th2 cell differentiation	5/159	92/8111	0.0341955	0.121079	0.0895318	4792/182/3718/4790/4794	5
hsa05168	Herpes simplex virus 1 infection	16/159	498/8111	0.0345224	0.121079	0.0895318	330/5452/4792/23586/6347/4790/64135/3553/718/3569/7097/3134/4049/7124/9641/6352	16
hsa00360	Phenylalanine metabolism	2/159	17/8111	0.0428349	0.148087	0.109503	259307/4128	2
hsa04068	FoxO signaling pathway	6/159	131/8111	0.0436151	0.14866	0.109927	6648/8743/3569/10018/3575/3667	6
hsa05205	Proteoglycans in cancer	8/159	205/8111	0.04821	0.162039	0.11982	5329/960/5328/3791/7097/7057/3673/7124	8
hsa04931	Insulin resistance	5/159	108/8111	0.0606927	0.198898	0.147075	4792/4790/3569/3667/7124	5
hsa04930	Type II diabetes mellitus	3/159	46/8111	0.0608199	0.198898	0.147075	773/3667/7124	3
hsa00340	Histidine metabolism	2/159	22/8111	0.0683005	0.219903	0.162608	55748/4128	2
hsa01521	EGFR tyrosine kinase inhibitor resistance	4/159	79/8111	0.0690605	0.219903	0.162608	3791/3569/56034/10018	4
hsa04072	Phospholipase D signaling pathway	6/159	148/8111	0.0705185	0.22163	0.163884	5898/4254/8605/56034/8613/3576	6
hsa04514	Cell adhesion molecules	6/159	149/8111	0.072345	0.224455	0.165974	6401/3383/23562/7412/9076/3134	6
hsa04662	B cell receptor signaling pathway	4/159	82/8111	0.0769353	0.235675	0.17427	4792/4790/4794/4067	4
hsa04630	JAK-STAT signaling pathway	6/159	162/8111	0.0985346	0.298067	0.220406	3718/1440/51561/3569/11009/3575	6
hsa04510	Focal adhesion	7/159	201/8111	0.0998421	0.298294	0.220574	330/3918/3791/7057/56034/3673/3914	7
hsa00400	Phenylalanine, tyrosine and tryptophan biosynthesis	1/159	8111-06-01	0.112035	0.329362	0.243548	259307	1
hsa04730	Long-term depression	3/159	60/8111	0.112963	0.329362	0.243548	8605/773/4067	3
hsa00410	beta-Alanine metabolism	2/159	30/8111	0.116377	0.335277	0.247922	54498/55748	2
hsa05150	Staphylococcus aureus infection	4/159	96/8111	0.119184	0.339324	0.250914	3383/718/715/716	4
hsa04710	Circadian rhythm	2/159	31/8111	0.12287	0.34575	0.255665	8553/5187	2
hsa04215	Apoptosis - multiple species	2/159	32/8111	0.129448	0.360075	0.266258	330/10018	2
hsa04660	T cell receptor signaling pathway	4/159	104/8111	0.146994	0.398785	0.294882	4792/4790/4794/7124	4
hsa04360	Axon guidance	6/159	182/8111	0.147276	0.398785	0.294882	59277/10371/10512/10500/223117/22885	6
hsa04664	Fc epsilon RI signaling pathway	3/159	68/8111	0.148309	0.398785	0.294882	8605/7124/4067	3
hsa05206	MicroRNAs in cancer	9/159	310/8111	0.154738	0.4115	0.304285	1870/960/90427/4790/5328/7057/8091/10018/3667	9
hsa00350	Tyrosine metabolism	2/159	36/8111	0.15651	0.411689	0.304424	259307/4128	2
hsa05218	Melanoma	3/159	72/8111	0.167172	0.434109	0.321003	1870/2250/56034	3
hsa05330	Allograft rejection	2/159	38/8111	0.170415	0.434109	0.321003	3134/7124	2
hsa05340	Primary immunodeficiency	2/159	38/8111	0.170415	0.434109	0.321003	3718/3575	2
hsa00072	Synthesis and degradation of ketone bodies	1/159	8111-10-01	0.179702	0.453	0.334971	3157	1
hsa04670	Leukocyte transendothelial migration	4/159	114/8111	0.184881	0.456362	0.337458	3383/23562/7412/9076	4
hsa05212	Pancreatic cancer	3/159	76/8111	0.186694	0.456362	0.337458	5898/1870/4790	3
hsa05220	Chronic myeloid leukemia	3/159	76/8111	0.186694	0.456362	0.337458	1870/4792/4790	3
hsa04612	Antigen processing and presentation	3/159	78/8111	0.196671	0.475943	0.351937	1520/3134/7124	3
hsa00380	Tryptophan metabolism	2/159	42/8111	0.19878	0.476284	0.352189	259307/4128	2
hsa00514	Other types of O-glycan biosynthesis	2/159	47/8111	0.234928	0.555484	0.410754	2683/117248	2
hsa05170	Human immunodeficiency virus 1 infection	6/159	212/8111	0.236425	0.555484	0.410754	4792/4790/7097/3134/7124/60489	6
hsa00280	Valine, leucine and isoleucine degradation	2/159	48/8111	0.242213	0.558312	0.412845	259307/3157	2
hsa00533	Glycosaminoglycan biosynthesis - keratan sulfate	1/159	14/8111	0.242243	0.558312	0.412845	2683	1
hsa00565	Ether lipid metabolism	2/159	49/8111	0.249507	0.55908	0.413413	8605/8613	2
hsa04672	Intestinal immune network for IgA production	2/159	49/8111	0.249507	0.55908	0.413413	10673/3569	2
hsa05030	Cocaine addiction	2/159	49/8111	0.249507	0.55908	0.413413	4790/4128	2
hsa04211	Longevity regulating pathway	3/159	89/8111	0.253516	0.562852	0.416202	4790/6648/3667	3
hsa04979	Cholesterol metabolism	2/159	50/8111	0.256808	0.564251	0.417236	9388/3949	2
hsa05410	Hypertrophic cardiomyopathy	3/159	90/8111	0.258809	0.564251	0.417236	3569/3673/7124	3
hsa04913	Ovarian steroidogenesis	2/159	51/8111	0.264113	0.570673	0.421985	8605/3949	2
hsa05322	Systemic lupus erythematosus	4/159	136/8111	0.277021	0.593266	0.438691	718/715/716/7124	4
hsa00910	Nitrogen metabolism	1/159	17/8111	0.286017	0.60716	0.448965	760	1
hsa04666	Fc gamma R-mediated phagocytosis	3/159	97/8111	0.296211	0.623331	0.460923	8605/8613/4067	3
hsa00564	Glycerophospholipid metabolism	3/159	98/8111	0.301589	0.6238	0.46127	8605/51365/8613	3
hsa05231	Choline metabolism in cancer	3/159	98/8111	0.301589	0.6238	0.46127	8605/56034/8613	3
hsa00480	Glutathione metabolism	2/159	57/8111	0.307868	0.631391	0.466883	51056/4953	2
hsa04370	VEGF signaling pathway	2/159	59/8111	0.322364	0.648451	0.479499	8605/3791	2
hsa05224	Breast cancer	4/159	147/8111	0.325709	0.648451	0.479499	1870/4791/182/2250	4
hsa00100	Steroid biosynthesis	1/159	20/8111	0.327278	0.648451	0.479499	6713	1
hsa00532	Glycosaminoglycan biosynthesis - chondroitin sulfate / dermatan sulfate	1/159	20/8111	0.327278	0.648451	0.479499	29940	1
hsa05416	Viral myocarditis	2/159	60/8111	0.329585	0.648451	0.479499	3383/3134	2
hsa00561	Glycerolipid metabolism	2/159	61/8111	0.336785	0.657273	0.486022	9388/8613	2
hsa04213	Longevity regulating pathway - multiple species	2/159	62/8111	0.343962	0.66591	0.492409	6648/3667	2
hsa00900	Terpenoid backbone biosynthesis	1/159	22/8111	0.35346	0.678867	0.50199	3157	1
hsa04066	HIF-1 signaling pathway	3/159	109/8111	0.360847	0.68692	0.507945	285/4790/3569	3
hsa00515	Mannose type O-glycan biosynthesis	1/159	23/8111	0.366168	0.68692	0.507945	2683	1
hsa04964	Proximal tubule bicarbonate reclamation	1/159	23/8111	0.366168	0.68692	0.507945	760	1
hsa05221	Acute myeloid leukemia	2/159	67/8111	0.379444	0.706349	0.522311	4790/7704	2
hsa00592	alpha-Linolenic acid metabolism	1/159	25/8111	0.390846	0.720383	0.532688	8605	1
hsa04726	Serotonergic synapse	3/159	115/8111	0.392936	0.720383	0.532688	8605/773/4128	3
hsa04917	Prolactin signaling pathway	2/159	70/8111	0.400352	0.722099	0.533957	4790/3659	2
hsa05207	Chemical carcinogenesis - receptor activation	5/159	212/8111	0.402221	0.722099	0.533957	182/4790/2250/773/9641	5
hsa00790	Folate biosynthesis	1/159	26/8111	0.402824	0.722099	0.533957	2643	1
hsa05223	Non-small cell lung cancer	2/159	72/8111	0.414109	0.726996	0.537578	1870/3718	2
hsa00601	Glycosphingolipid biosynthesis - lacto and neolacto series	1/159	27/8111	0.414568	0.726996	0.537578	2683	1
hsa04966	Collecting duct acid secretion	1/159	27/8111	0.414568	0.726996	0.537578	760	1
hsa00650	Butanoate metabolism	1/159	28/8111	0.426082	0.741813	0.548535	3157	1
hsa05010	Alzheimer disease	8/159	369/8111	0.437106	0.74655	0.552038	4790/3552/3553/3569/3667/2081/1435/7124	8
hsa00591	Linoleic acid metabolism	1/159	29/8111	0.437372	0.74655	0.552038	8605	1
hsa04611	Platelet activation	3/159	124/8111	0.440247	0.74655	0.552038	8605/3673/4067	3
hsa04971	Gastric acid secretion	2/159	76/8111	0.441143	0.74655	0.552038	760/3759	2
hsa05412	Arrhythmogenic right ventricular cardiomyopathy	2/159	77/8111	0.447796	0.752546	0.556471	1832/3673	2
hsa00052	Galactose metabolism	1/159	31/8111	0.459293	0.761294	0.56294	2683	1
hsa05310	Asthma	1/159	31/8111	0.459293	0.761294	0.56294	7124	1
hsa04650	Natural killer cell mediated cytotoxicity	3/159	131/8111	0.476068	0.783731	0.579531	3383/8743/7124	3
hsa00760	Nicotinate and nicotinamide metabolism	1/159	35/8111	0.500621	0.812015	0.600446	10135	1
hsa05210	Colorectal cancer	2/159	86/8111	0.505592	0.812015	0.600446	5898/10018	2
hsa04371	Apelin signaling pathway	3/159	137/8111	0.505923	0.812015	0.600446	182/5327/8862	3
hsa04020	Calcium signaling pathway	5/159	240/8111	0.509475	0.812015	0.600446	5027/3791/2250/773/56034	5
hsa00512	Mucin type O-glycan biosynthesis	1/159	36/8111	0.510453	0.812015	0.600446	117248	1
hsa04613	Neutrophil extracellular trap formation	4/159	190/8111	0.514208	0.812015	0.600446	9734/4790/718/7097	4
hsa00250	Alanine, aspartate and glutamate metabolism	1/159	37/8111	0.520092	0.812015	0.600446	259307	1
hsa04960	Aldosterone-regulated sodium reabsorption	1/159	37/8111	0.520092	0.812015	0.600446	3667	1
hsa04976	Bile secretion	2/159	89/8111	0.523978	0.812838	0.601054	760/3949	2
hsa04550	Signaling pathways regulating pluripotency of stem cells	3/159	143/8111	0.534888	0.824477	0.609661	3718/3624/3397	3
hsa00513	Various types of N-glycan biosynthesis	1/159	39/8111	0.538809	0.825264	0.610243	2683	1
hsa00260	Glycine, serine and threonine metabolism	1/159	40/8111	0.547893	0.828689	0.612775	4128	1
hsa05033	Nicotine addiction	1/159	40/8111	0.547893	0.828689	0.612775	773	1
hsa04216	Ferroptosis	1/159	41/8111	0.5568	0.836929	0.618869	6303	1
hsa05414	Dilated cardiomyopathy	2/159	96/8111	0.565071	0.840205	0.621291	3673/7124	2
hsa04975	Fat digestion and absorption	1/159	43/8111	0.574093	0.840205	0.621291	8613	1
hsa01522	Endocrine resistance	2/159	98/8111	0.576339	0.840205	0.621291	1870/182	2
hsa04750	Inflammatory mediator regulation of TRP channels	2/159	98/8111	0.576339	0.840205	0.621291	8605/3553	2
hsa04925	Aldosterone synthesis and secretion	2/159	98/8111	0.576339	0.840205	0.621291	3949/4929	2
hsa02010	ABC transporters	1/159	45/8111	0.590716	0.856008	0.632976	21	1
hsa04972	Pancreatic secretion	2/159	102/8111	0.598235	0.861743	0.637217	6558/760	2
hsa00600	Sphingolipid metabolism	1/159	49/8111	0.622052	0.88058	0.651147	8613	1
hsa05020	Prion disease	5/159	273/8111	0.624804	0.88058	0.651147	3552/3553/3569/7124/6352	5
hsa00270	Cysteine and methionine metabolism	1/159	50/8111	0.629506	0.88058	0.651147	259307	1
hsa00510	N-Glycan biosynthesis	1/159	50/8111	0.629506	0.88058	0.651147	2683	1
hsa05110	Vibrio cholerae infection	1/159	50/8111	0.629506	0.88058	0.651147	6558	1
hsa04310	Wnt signaling pathway	3/159	166/8111	0.636445	0.88517	0.654541	64321/8061/4919	3
hsa05320	Autoimmune thyroid disease	1/159	53/8111	0.651002	0.899328	0.665009	3134	1
hsa04725	Cholinergic synapse	2/159	113/8111	0.654056	0.899328	0.665009	3759/773	2
hsa04724	Glutamatergic synapse	2/159	114/8111	0.658814	0.900752	0.666063	8605/773	2
hsa00240	Pyrimidine metabolism	1/159	56/8111	0.671259	0.906604	0.67039	1890	1
hsa04340	Hedgehog signaling pathway	1/159	56/8111	0.671259	0.906604	0.67039	64399	1
hsa04923	Regulation of lipolysis in adipocytes	1/159	57/8111	0.677748	0.906604	0.67039	3667	1
hsa04071	Sphingolipid signaling pathway	2/159	119/8111	0.681826	0.906604	0.67039	4790/7124	2
hsa04935	Growth hormone synthesis, secretion and action	2/159	119/8111	0.681826	0.906604	0.67039	3667/3726	2
hsa04330	Notch signaling pathway	1/159	59/8111	0.690347	0.912918	0.675059	182	1
hsa04978	Mineral absorption	1/159	60/8111	0.696461	0.915998	0.677337	4502	1
hsa00590	Arachidonic acid metabolism	1/159	61/8111	0.702456	0.918889	0.679474	8605	1
hsa05217	Basal cell carcinoma	1/159	63/8111	0.714095	0.928666	0.686704	64399	1
hsa04142	Lysosome	2/159	128/8111	0.720058	0.928666	0.686704	27074/1520	2
hsa04926	Relaxin signaling pathway	2/159	129/8111	0.72406	0.928666	0.686704	4792/4790	2
hsa04927	Cortisol synthesis and secretion	1/159	65/8111	0.725281	0.928666	0.686704	3949	1
hsa00970	Aminoacyl-tRNA biosynthesis	1/159	66/8111	0.73071	0.930693	0.688203	7453	1
hsa04728	Dopaminergic synapse	2/159	132/8111	0.735779	0.930911	0.688364	773/4128	2
hsa04924	Renin secretion	1/159	69/8111	0.746365	0.930911	0.688364	3759	1
hsa05031	Amphetamine addiction	1/159	69/8111	0.746365	0.930911	0.688364	4128	1
hsa05211	Renal cell carcinoma	1/159	69/8111	0.746365	0.930911	0.688364	2113	1
hsa04140	Autophagy - animal	2/159	137/8111	0.754374	0.930911	0.688364	3667/2081	2
hsa04520	Adherens junction	1/159	71/8111	0.756295	0.930911	0.688364	5787	1
hsa00982	Drug metabolism - cytochrome P450	1/159	72/8111	0.761115	0.930911	0.688364	4128	1
hsa01524	Platinum drug resistance	1/159	73/8111	0.76584	0.930911	0.688364	330	1
hsa04115	p53 signaling pathway	1/159	73/8111	0.76584	0.930911	0.688364	7057	1
hsa05214	Glioma	1/159	75/8111	0.775013	0.930911	0.688364	1870	1
hsa05017	Spinocerebellar ataxia	2/159	143/8111	0.775199	0.930911	0.688364	773/2081	2
hsa03320	PPAR signaling pathway	1/159	76/8111	0.779464	0.930911	0.688364	3157	1
hsa04721	Synaptic vesicle cycle	1/159	78/8111	0.788106	0.930911	0.688364	773	1
hsa05226	Gastric cancer	2/159	149/8111	0.794474	0.930911	0.688364	1870/2250	2
hsa00983	Drug metabolism - other enzymes	1/159	80/8111	0.796412	0.930911	0.688364	1890	1
hsa04146	Peroxisome	1/159	82/8111	0.804394	0.930911	0.688364	6648	1
hsa04810	Regulation of actin cytoskeleton	3/159	218/8111	0.806052	0.930911	0.688364	2250/56034/3673	3
hsa04024	cAMP signaling pathway	3/159	219/8111	0.808538	0.930911	0.688364	4792/4790/64399	3
hsa04921	Oxytocin signaling pathway	2/159	154/8111	0.809415	0.930911	0.688364	8605/3759	2
hsa04150	mTOR signaling pathway	2/159	155/8111	0.812285	0.930911	0.688364	3667/7124	2
hsa04934	Cushing syndrome	2/159	155/8111	0.812285	0.930911	0.688364	1870/3949	2
hsa04390	Hippo signaling pathway	2/159	157/8111	0.817911	0.930911	0.688364	330/3397	2
hsa04742	Taste transduction	1/159	86/8111	0.819437	0.930911	0.688364	773	1
hsa04540	Gap junction	1/159	88/8111	0.826522	0.930911	0.688364	56034	1
hsa04727	GABAergic synapse	1/159	89/8111	0.82996	0.930911	0.688364	773	1
hsa05022	Pathways of neurodegeneration - multiple diseases	7/159	475/8111	0.830896	0.930911	0.688364	4790/3552/3553/3569/2081/1435/7124	7
hsa05032	Morphine addiction	1/159	91/8111	0.836634	0.931587	0.688864	773	1
hsa04912	GnRH signaling pathway	1/159	93/8111	0.843048	0.931587	0.688864	8605	1
hsa04970	Salivary secretion	1/159	93/8111	0.843048	0.931587	0.688864	6558	1
hsa04530	Tight junction	2/159	169/8111	0.848615	0.933477	0.690261	23562/9076	2
hsa04713	Circadian entrainment	1/159	97/8111	0.855134	0.936391	0.692416	5187	1
hsa04916	Melanogenesis	1/159	101/8111	0.866295	0.94434	0.698294	4254	1
hsa04144	Endocytosis	3/159	252/8111	0.87671	0.94969	0.70225	3949/1601/3134	3
hsa04928	Parathyroid hormone synthesis, secretion and action	1/159	106/8111	0.879052	0.94969	0.70225	4929	1
hsa05034	Alcoholism	2/159	187/8111	0.885954	0.952893	0.704619	9734/4128	2
hsa04152	AMPK signaling pathway	1/159	120/8111	0.908691	0.967731	0.71559	3667	1
hsa04919	Thyroid hormone signaling pathway	1/159	121/8111	0.910507	0.967731	0.71559	1734	1
hsa05415	Diabetic cardiomyopathy	2/159	203/8111	0.911829	0.967731	0.71559	4790/3667	2
hsa04110	Cell cycle	1/159	124/8111	0.915745	0.967731	0.71559	1870	1
hsa00230	Purine metabolism	1/159	130/8111	0.925324	0.973602	0.719932	2766	1
hsa04270	Vascular smooth muscle contraction	1/159	133/8111	0.929699	0.973971	0.720205	8605	1
hsa04910	Insulin signaling pathway	1/159	137/8111	0.935139	0.975211	0.721122	3667	1
hsa04120	Ubiquitin mediated proteolysis	1/159	140/8111	0.938943	0.975211	0.721122	330	1
hsa04723	Retrograde endocannabinoid signaling	1/159	148/8111	0.948036	0.975406	0.721266	773	1
hsa01240	Biosynthesis of cofactors	1/159	156/8111	0.955783	0.975406	0.721266	2643	1
hsa05012	Parkinson disease	2/159	249/8111	0.958938	0.975406	0.721266	2081/4128	2
hsa04022	cGMP-PKG signaling pathway	1/159	167/8111	0.964594	0.975406	0.721266	3667	1
hsa05225	Hepatocellular carcinoma	1/159	168/8111	0.965302	0.975406	0.721266	1870	1
hsa04080	Neuroactive ligand-receptor interaction	3/159	341/8111	0.966424	0.975406	0.721266	5027/718/8862	3
hsa04141	Protein processing in endoplasmic reticulum	1/159	171/8111	0.967345	0.975406	0.721266	2081	1
hsa05016	Huntington disease	2/159	306/8111	0.984697	0.988783	0.731158	6648/2081	2
hsa05014	Amyotrophic lateral sclerosis	2/159	364/8111	0.99459	0.99459	0.735451	2081/7124	2

## Sheet: ORA pathway treatment 2
ID	Description	GeneRatio	BgRatio	pvalue	p.adjust	qvalue	geneID	Count
hsa04668	TNF signaling pathway	30/294	112/8111	1.52417e-18	4.2067e-16	3.22482e-16	8837/6376/6401/330/7185/602/2920/3383/4792/182/8717/6347/4790/6364/7128/6372/3659/3553/3569/7412/2921/6374/2919/197259/3627/3726/1435/4049/7124/6352	30
hsa04064	NF-kappa B signaling pathway	27/294	104/8111	2.05479e-16	2.83561e-14	2.17375e-14	8837/330/7185/4791/2920/1540/3383/4616/4792/958/10673/8717/5971/23586/4790/7128/5328/3553/7412/2921/2919/3576/4615/4049/4050/7124/4067	27
hsa05169	Epstein-Barr virus infection	36/294	202/8111	7.63221e-16	7.02163e-14	5.38271e-14	1870/864/960/4791/4938/3383/4616/4792/958/8717/5971/3718/23586/4790/4940/4939/6772/7128/3569/7097/6502/4794/10018/3455/6890/3627/6773/4615/9636/6891/3134/3105/7124/3106/4067/9641	36
hsa04621	NOD-like receptor signaling pathway	30/294	181/8111	1.64984e-12	1.13839e-10	8.72676e-11	330/2920/5027/4938/4792/8767/10135/6347/4790/24145/4940/4939/6772/2635/2633/7128/3553/3569/115362/3455/2634/115361/2921/2919/3576/6773/4615/7124/9641/6352	30
hsa05164	Influenza A	29/294	172/8111	2.54446e-12	1.40454e-10	1.07671e-10	4938/3383/3717/4792/8717/23586/6347/4790/4940/4939/3552/64135/6772/8743/3553/91543/3569/5371/4599/3455/7098/3627/3576/6773/4615/4600/7124/9641/6352	29
hsa05323	Rheumatoid arthritis	20/294	93/8111	7.84563e-11	3.60899e-09	2.76662e-09	2920/3383/10673/6347/51561/3552/6364/6372/3553/3569/7097/2921/6374/2919/3576/155066/1435/4050/7124/6352	20
hsa04657	IL-17 signaling pathway	19/294	94/8111	7.31027e-10	2.88234e-08	2.20957e-08	2920/4792/8717/1440/6347/4790/6364/7128/6372/3553/3569/2921/6374/2919/3627/3576/8061/7124/9641	19
hsa05144	Malaria	14/294	50/8111	1.43791e-09	4.96081e-08	3.80291e-08	6401/3383/958/1440/6347/6382/3553/3569/7097/7057/7412/3576/4615/7124	14
hsa05417	Lipid and atherosclerosis	28/294	215/8111	3.07791e-09	9.43894e-08	7.2358e-08	6401/5452/2920/3383/3717/4792/958/6347/4790/6648/8743/3553/3949/3569/7097/5530/7436/7412/2921/2919/19/3576/4615/2081/7124/4067/9641/6352	28
hsa05171	Coronavirus disease - COVID-19	29/294	232/8111	4.14769e-09	1.08045e-07	8.28265e-08	4938/4792/23586/1440/6347/4790/4940/4939/1839/64135/6772/3553/718/3569/7097/6868/4599/3455/715/7098/3627/3576/6773/4615/716/4600/9636/7124/9641	29
hsa05162	Measles	22/294	139/8111	4.30615e-09	1.08045e-07	8.28265e-08	4938/4792/8717/27113/3718/23586/4790/4940/4939/3552/64135/6772/7128/3553/3569/7097/4599/3455/6773/4615/4600/9641	22
hsa04060	Cytokine-cytokine receptor interaction	33/294	295/8111	5.81316e-09	1.33703e-07	1.02495e-07	6376/9235/2920/958/10673/1440/6347/51561/3977/3552/6364/8743/3624/6372/3553/3601/3569/3557/27242/3455/11009/2921/6374/2919/3575/3627/6373/3576/1435/4049/4050/7124/6352	33
hsa05160	Hepatitis C	23/294	157/8111	8.79715e-09	1.8677e-07	1.43176e-07	8837/1870/4938/4792/8717/23586/4790/4940/4939/6772/3949/91543/4599/3455/23562/9076/7098/3627/6773/4600/3434/7124/9641	23
hsa04061	Viral protein interaction with cytokine and cytokine receptor	18/294	100/8111	1.44812e-08	2.85487e-07	2.18852e-07	6376/2920/6347/6364/8743/6372/3569/11009/2921/6374/2919/3627/6373/3576/1435/4049/7124/6352	18
hsa05167	Kaposi sarcoma-associated herpesvirus infection	25/294	193/8111	2.51214e-08	4.62234e-07	3.54344e-07	1870/2920/3383/285/3717/3091/4792/8717/4790/6772/718/3569/2247/5530/3455/2921/2919/7098/3576/6773/3134/3105/3106/4067/9641	25
hsa05134	Legionellosis	13/294	57/8111	8.3514e-08	1.44062e-06	1.10436e-06	4791/2920/4792/4790/3553/718/3569/7097/2921/2919/3576/4615/7124	13
hsa05133	Pertussis	14/294	76/8111	4.49963e-07	7.30529e-06	5.60016e-06	4790/51561/3552/6372/3659/3553/718/3569/715/6374/3576/4615/716/7124	14
hsa04620	Toll-like receptor signaling pathway	16/294	104/8111	8.77535e-07	1.27474e-05	9.772e-06	4792/958/4790/6772/3553/3569/7097/3455/7098/3627/6373/3576/4615/7124/9641/6352	16
hsa04625	C-type lectin receptor signaling pathway	16/294	104/8111	8.77535e-07	1.27474e-05	9.772e-06	602/4791/1540/4792/5971/4790/51561/6772/3659/3553/3569/5530/26253/6773/7124/9641	16
hsa04622	RIG-I-like receptor signaling pathway	12/294	70/8111	6.64425e-06	8.73244e-05	6.6942e-05	1540/4792/8717/23586/79132/4790/64135/3627/3576/9636/7124/9641	12
hsa05120	Epithelial cell signaling in Helicobacter pylori infection	12/294	70/8111	6.64425e-06	8.73244e-05	6.6942e-05	2920/4792/4790/1839/6868/50848/2921/2919/3576/155066/4067/6352	12
hsa04380	Osteoclast differentiation	16/294	128/8111	1.40566e-05	0.000176347	0.000135186	4791/1540/4792/5971/4790/3552/6772/3553/5530/3455/8878/6773/3726/8061/1435/7124	16
hsa04217	Necroptosis	18/294	159/8111	1.64827e-05	0.000197792	0.000151626	8837/330/1540/3717/8717/8605/3718/3552/6772/7128/8743/3553/3455/8878/7098/197259/6773/7124	18
hsa04062	Chemokine signaling pathway	20/294	192/8111	1.94517e-05	0.000223695	0.000171482	6376/2920/3717/4792/3718/6347/4790/6364/6772/6372/409/2921/6374/2919/3627/6373/3576/6773/4067/6352	20
hsa04010	MAPK signaling pathway	26/294	294/8111	2.15513e-05	0.000237926	0.000182392	6196/4791/285/4616/8717/5971/8605/4790/80824/5924/3552/1846/3553/1847/2250/2247/5530/1848/409/773/56034/1942/3643/4615/1435/7124	26
hsa05143	African trypanosomiasis	8/294	37/8111	4.17807e-05	0.000430668	0.000330146	6401/3383/8542/3553/3569/7412/4615/7124	8
hsa05166	Human T-cell leukemia virus 1 infection	21/294	219/8111	4.21306e-05	0.000430668	0.000330146	1870/4791/3383/4792/958/5971/3718/4790/3601/2113/3569/5530/2114/4487/4088/8061/3134/3105/4049/7124/3106	21
hsa04933	AGE-RAGE signaling pathway in diabetic complications	13/294	100/8111	5.97792e-05	0.000589252	0.000451715	6401/3383/3717/6347/4790/3552/6772/3553/3569/7412/4088/3576/7124	13
hsa05161	Hepatitis B	17/294	162/8111	7.50534e-05	0.000714301	0.000547576	1870/3717/4792/3718/23586/4790/64135/6772/3569/7097/7098/4088/3576/6773/4615/7124/9641	17
hsa05152	Tuberculosis	18/294	180/8111	8.70863e-05	0.000801194	0.000614188	3717/8717/8767/4790/51561/3552/6772/3553/718/3656/3569/7097/5530/22925/1520/26253/4615/7124	18
hsa04210	Apoptosis	15/294	136/8111	0.000113238	0.00100818	0.000772864	8837/330/7185/4616/4792/8717/27113/4790/1075/8743/5366/10018/1520/2081/7124	15
hsa05142	Chagas disease	12/294	102/8111	0.000299448	0.00258274	0.0019799	8837/4792/6347/4790/3553/718/3569/7097/3576/4615/7124/6352	12
hsa05235	PD-L1 expression and PD-1 checkpoint pathway in cancer	11/294	89/8111	0.000345963	0.00289351	0.00221814	3717/3091/4792/4790/6772/55509/7097/5530/4794/116071/4615	11
hsa05165	Human papillomavirus infection	25/294	331/8111	0.000386695	0.00313905	0.00240637	3918/182/8717/4790/6772/3659/3691/8638/7057/55502/9223/4599/3455/3673/7098/6773/155066/4600/9636/3914/3134/3105/7124/3106/9641	25
hsa05140	Leishmaniasis	10/294	77/8111	0.000428397	0.00337822	0.00258971	3717/4792/4790/3552/6772/3553/718/7097/4615/7124	10
hsa04659	Th17 cell differentiation	12/294	107/8111	0.000467569	0.0035847	0.002748	3717/3091/4792/3718/4790/51561/6772/3553/3569/5530/4794/4088	12
hsa05321	Inflammatory bowel disease	9/294	65/8111	0.000512281	0.00373157	0.00286059	4790/51561/3552/6772/3553/3569/7097/4088/7124	9
hsa04218	Cellular senescence	15/294	156/8111	0.000513768	0.00373157	0.00286059	1870/4616/4683/4790/3552/2113/3569/5530/8878/4088/3576/677/3134/3105/3106	15
hsa05332	Graft-versus-host disease	7/294	42/8111	0.000693274	0.0048931	0.003751	3552/3553/3569/3134/3105/7124/3106	7
hsa05145	Toxoplasmosis	12/294	112/8111	0.000709145	0.0048931	0.003751	330/3918/3717/4792/958/4790/6772/3949/7097/4615/3914/7124	12
hsa04940	Type I diabetes mellitus	7/294	43/8111	0.000802824	0.00540438	0.00414294	3552/3553/3134/3105/4049/7124/3106	7
hsa05146	Amoebiasis	11/294	102/8111	0.00111231	0.00730943	0.00560334	3918/2920/4790/3553/3569/7097/2921/2919/3576/3914/7124	11
hsa04145	Phagosome	14/294	152/8111	0.00119794	0.00768907	0.00589437	7037/718/7097/7057/22925/715/1520/3673/6890/155066/6891/3134/3105/3106	14
hsa05202	Transcriptional misregulation in cancer	16/294	192/8111	0.00159628	0.010013	0.0076759	51513/330/7185/4616/958/4790/7704/604/5328/3569/1848/5371/64332/8091/3576/26471	16
hsa05222	Small cell lung cancer	10/294	92/8111	0.00174632	0.0107108	0.00821078	1870/330/7185/3918/4616/4792/4790/6502/3673/3914	10
hsa04623	Cytosolic DNA-sensing pathway	8/294	63/8111	0.00185207	0.0111124	0.00851869	4792/23586/4790/3553/3569/3627/9641/6352	8
hsa05168	Herpes simplex virus 1 infection	31/294	498/8111	0.00211112	0.0123972	0.0095036	330/5452/4938/3717/4792/8717/23586/6347/4790/4940/4939/64135/6772/3553/718/3569/7097/5371/3455/7098/6890/6773/4615/6891/3134/3105/4049/7124/3106/9641/6352	31
hsa04640	Hematopoietic cell lineage	10/294	99/8111	0.00302131	0.0173726	0.0133176	960/7037/1440/3552/3553/3569/3673/3575/1435/7124	10
hsa05163	Human cytomegalovirus infection	17/294	225/8111	0.00327553	0.0184499	0.0141435	6376/1870/4792/8717/6347/4790/3553/3569/5530/6890/3576/6891/3134/3105/7124/3106/6352	17
hsa01523	Antifolate resistance	5/294	31/8111	0.00473414	0.0261324	0.0200329	4790/3553/3569/6573/7124	5
hsa04658	Th1 and Th2 cell differentiation	9/294	92/8111	0.00594449	0.0321702	0.0246613	864/3717/4792/182/3718/4790/6772/5530/4794	9
hsa04612	Antigen processing and presentation	8/294	78/8111	0.00702984	0.0373122	0.0286032	5641/1520/6890/6891/3134/3105/7124/3106	8
hsa04514	Cell adhesion molecules	12/294	149/8111	0.00777194	0.0404727	0.031026	6401/3383/958/6382/50848/23562/7412/9076/80380/3134/3105/3106	12
hsa04151	PI3K-Akt signaling pathway	22/294	354/8111	0.00933511	0.0477128	0.0365762	3918/285/3717/3718/1440/4790/3691/3569/7097/7057/2250/2247/56034/9223/10018/3455/3673/3575/1942/3643/1435/3914	22
hsa05170	Human immunodeficiency virus 1 infection	15/294	212/8111	0.0100478	0.049672	0.0380781	4792/8717/4790/200316/7097/5530/6890/4615/6891/3134/3105/7124/3106/60489/140564	15
hsa04014	Ras signaling pathway	16/294	232/8111	0.0100784	0.049672	0.0380781	5898/5337/285/8605/4790/5924/2113/9771/2250/2247/51365/56034/2114/1942/3643/1435	16
hsa05330	Allograft rejection	5/294	38/8111	0.0113839	0.0541715	0.0415273	958/3134/3105/7124/3106	5
hsa05340	Primary immunodeficiency	5/294	38/8111	0.0113839	0.0541715	0.0415273	958/3718/6890/3575/6891	5
hsa05130	Pathogenic Escherichia coli infection	14/294	197/8111	0.0122217	0.0571726	0.0438279	4792/8717/4790/8743/3553/4430/3569/4651/23562/9076/3576/4615/10458/7124	14
hsa04512	ECM-receptor interaction	8/294	88/8111	0.0141446	0.0650653	0.0498785	960/3918/6382/3691/7057/3673/961/3914	8
hsa04630	JAK-STAT signaling pathway	12/294	162/8111	0.0145476	0.065822	0.0504585	3717/3718/1440/51561/3977/6772/3601/3569/3455/11009/3575/6773	12
hsa05219	Bladder cancer	5/294	41/8111	0.015568	0.0693028	0.0531268	1870/1890/1839/7057/3576	5
hsa05203	Viral carcinogenesis	14/294	204/8111	0.0161829	0.0708964	0.0543485	9734/7185/4791/4792/8717/3718/4790/718/5366/6502/3134/3105/3106/4067	14
hsa05132	Salmonella infection	16/294	249/8111	0.0187174	0.0807188	0.0618783	5898/330/4792/10398/8717/8767/4790/8743/3553/3569/7097/6993/197259/3576/4615/7124	16
hsa05212	Pancreatic cancer	7/294	76/8111	0.019798	0.084025	0.0644127	5898/1870/5337/4616/4790/6772/4088	7
hsa04015	Rap1 signaling pathway	14/294	210/8111	0.0203041	0.084025	0.0644127	5898/285/25865/3397/9732/9771/7057/2250/2247/56034/9223/1942/3643/1435	14
hsa04068	FoxO signaling pathway	10/294	131/8111	0.0203974	0.084025	0.0644127	4616/6648/604/8743/3569/6502/10018/4088/3575/3643	10
hsa05135	Yersinia infection	10/294	137/8111	0.0268783	0.109094	0.0836306	6196/4792/6347/4790/3553/3569/3576/4615/10458/7124	10
hsa04215	Apoptosis - multiple species	4/294	32/8111	0.0273566	0.109427	0.0838853	330/27113/5366/10018	4
hsa05418	Fluid shear stress and atherosclerosis	10/294	139/8111	0.0293338	0.115659	0.0886631	6401/3383/6347/4790/3552/6382/3553/8878/7412/7124	10
hsa05131	Shigellosis	15/294	246/8111	0.0336813	0.129883	0.0995673	960/4792/10398/8717/8767/4790/3553/718/92610/10318/8878/3576/4615/7124/6352	15
hsa04979	Cholesterol metabolism	5/294	50/8111	0.0338826	0.129883	0.0995673	9388/3949/57552/26119/19	5
hsa00330	Arginine and proline metabolism	5/294	51/8111	0.0364949	0.137981	0.105775	51056/54498/6303/55748/4128	5
hsa04920	Adipocytokine signaling pathway	6/294	69/8111	0.0383368	0.142986	0.109612	3717/4792/8717/4790/4794/7124	6
hsa00230	Purine metabolism	9/294	130/8111	0.0462499	0.1702	0.130473	5141/22978/3614/10846/51251/4907/2766/7498/5142	9
hsa00240	Pyrimidine metabolism	5/294	56/8111	0.0513821	0.186598	0.143044	1890/22978/51251/129607/4907	5
hsa04350	TGF-beta signaling pathway	7/294	94/8111	0.05387	0.193093	0.148023	3624/3397/10468/7057/4091/4088/7124	7
hsa05416	Viral myocarditis	5/294	60/8111	0.0655071	0.231794	0.177691	3383/958/3134/3105/3106	5
hsa00601	Glycosphingolipid biosynthesis - lacto and neolacto series	3/294	27/8111	0.072666	0.250698	0.192182	2683/53947/84002	3
hsa04966	Collecting duct acid secretion	3/294	27/8111	0.072666	0.250698	0.192182	760/10723/155066	3
hsa04144	Endocytosis	14/294	252/8111	0.0738048	0.251483	0.192784	7037/5337/3949/5371/409/112936/1601/26119/116987/4088/10193/3134/3105/3106	14
hsa02010	ABC transporters	4/294	45/8111	0.079007	0.265926	0.203856	19/21/6890/6891	4
hsa05210	Colorectal cancer	6/294	86/8111	0.0913051	0.303617	0.23275	5898/4616/27113/5366/10018/4088	6
hsa04672	Intestinal immune network for IgA production	4/294	49/8111	0.100688	0.330831	0.253611	958/10673/3601/3569	4
hsa04932	Non-alcoholic fatty liver disease	9/294	155/8111	0.109931	0.356953	0.273637	4790/3552/3553/3569/10018/3576/3643/2081/7124	9
hsa05218	Melanoma	5/294	72/8111	0.119376	0.383114	0.293691	1870/4616/2250/2247/56034	5
hsa00360	Phenylalanine metabolism	2/294	17/8111	0.124677	0.383613	0.294074	259307/4128	2
hsa00910	Nitrogen metabolism	2/294	17/8111	0.124677	0.383613	0.294074	771/760	2
hsa05320	Autoimmune thyroid disease	4/294	53/8111	0.124799	0.383613	0.294074	958/3134/3105/3106	4
hsa05205	Proteoglycans in cancer	11/294	205/8111	0.125091	0.383613	0.294074	5329/960/3091/1839/6382/5328/7097/7057/2247/3673/7124	11
hsa00760	Nicotinate and nicotinamide metabolism	3/294	35/8111	0.132236	0.401066	0.307453	22978/10135/4907	3
hsa04666	Fc gamma R-mediated phagocytosis	6/294	97/8111	0.139601	0.409276	0.313747	5337/8605/4651/8613/4067/4082	6
hsa05215	Prostate cancer	6/294	97/8111	0.139601	0.409276	0.313747	1870/4792/4790/5328/56034/4824	6
hsa00512	Mucin type O-glycan biosynthesis	3/294	36/8111	0.140614	0.409276	0.313747	117248/9334/55568	3
hsa05220	Chronic myeloid leukemia	5/294	76/8111	0.140874	0.409276	0.313747	1870/4616/4792/4790/4088	5
hsa05207	Chemical carcinogenesis - receptor activation	11/294	212/8111	0.147304	0.419897	0.321889	6196/3717/182/4790/604/9314/2250/2247/409/773/9641	11
hsa04550	Signaling pathways regulating pluripotency of stem cells	8/294	143/8111	0.147572	0.419897	0.321889	3717/3718/3977/3624/3397/9314/2247/4088	8
hsa01521	EGFR tyrosine kinase inhibitor resistance	5/294	79/8111	0.158025	0.445051	0.341172	3717/3569/2247/56034/10018	5
hsa04146	Peroxisome	5/294	82/8111	0.175984	0.485715	0.372345	11264/6648/55825/7498/3418	5
hsa04662	B cell receptor signaling pathway	5/294	82/8111	0.175984	0.485715	0.372345	4792/4790/5530/4794/4067	5
hsa04142	Lysosome	7/294	128/8111	0.182339	0.494208	0.378855	27074/5641/1075/4891/950/1520/9516	7
hsa04216	Ferroptosis	3/294	41/8111	0.184898	0.494208	0.378855	7037/4891/6303	3
hsa04928	Parathyroid hormone synthesis, secretion and action	6/294	106/8111	0.186286	0.494208	0.378855	5141/5337/1839/409/4929/5142	6
hsa00340	Histidine metabolism	2/294	22/8111	0.18876	0.494208	0.378855	55748/4128	2
hsa00900	Terpenoid backbone biosynthesis	2/294	22/8111	0.18876	0.494208	0.378855	3157/51449	2
hsa00380	Tryptophan metabolism	3/294	42/8111	0.194162	0.494208	0.378855	259307/883/4128	3
hsa04610	Complement and coagulation cascades	5/294	85/8111	0.194676	0.494208	0.378855	5329/5328/718/715/716	5
hsa04650	Natural killer cell mediated cytotoxicity	7/294	131/8111	0.19733	0.494208	0.378855	3383/8743/5530/3455/3105/7124/3106	7
hsa04931	Insulin resistance	6/294	108/8111	0.197412	0.494208	0.378855	6196/4792/4790/3569/3643/7124	6
hsa00232	Caffeine metabolism	1/294	8111-06-01	0.198757	0.494208	0.378855	7498	1
hsa00400	Phenylalanine, tyrosine and tryptophan biosynthesis	1/294	8111-06-01	0.198757	0.494208	0.378855	259307	1
hsa00515	Mannose type O-glycan biosynthesis	2/294	23/8111	0.202085	0.495986	0.380218	2683/11041	2
hsa04066	HIF-1 signaling pathway	6/294	109/8111	0.203067	0.495986	0.380218	7037/285/3091/4790/3569/3643	6
hsa04360	Axon guidance	9/294	182/8111	0.214877	0.520228	0.398802	10371/10512/1947/10398/5530/10500/223117/1942/27289	9
hsa05221	Acute myeloid leukemia	4/294	67/8111	0.224458	0.538102	0.412504	4790/7704/1848/5371	4
hsa04670	Leukocyte transendothelial migration	6/294	114/8111	0.232179	0.538102	0.412504	3383/10398/50848/23562/7412/9076	6
hsa03050	Proteasome	3/294	46/8111	0.232246	0.538102	0.412504	5685/5696/5698	3
hsa04930	Type II diabetes mellitus	3/294	46/8111	0.232246	0.538102	0.412504	773/3643/7124	3
hsa04137	Mitophagy - animal	4/294	68/8111	0.232263	0.538102	0.412504	3091/10133/9958/8878	4
hsa05032	Morphine addiction	5/294	91/8111	0.233957	0.538102	0.412504	5141/10846/409/773/5142	5
hsa00514	Other types of O-glycan biosynthesis	3/294	47/8111	0.241977	0.551946	0.423117	2683/117248/55568	3
hsa04917	Prolactin signaling pathway	4/294	70/8111	0.248066	0.561199	0.43021	3717/4790/6772/3659	4
hsa04520	Adherens junction	4/294	71/8111	0.256055	0.574561	0.440453	10580/4088/3643/10458	4
hsa00565	Ether lipid metabolism	3/294	49/8111	0.261626	0.579617	0.444329	5337/8605/8613	3
hsa04722	Neurotrophin signaling pathway	6/294	119/8111	0.262508	0.579617	0.444329	6196/4792/8767/4790/3656/4794	6
hsa04115	p53 signaling pathway	4/294	73/8111	0.272181	0.596207	0.457046	4616/27113/7057/5366	4
hsa04913	Ovarian steroidogenesis	3/294	51/8111	0.28147	0.603919	0.462958	8605/3949/3643	3
hsa00564	Glycerophospholipid metabolism	5/294	98/8111	0.282266	0.603919	0.462958	5337/8605/51365/23171/8613	5
hsa05231	Choline metabolism in cancer	5/294	98/8111	0.282266	0.603919	0.462958	5337/3091/8605/56034/8613	5
hsa04072	Phospholipase D signaling pathway	7/294	148/8111	0.289994	0.61568	0.471974	5898/5337/8605/56034/8613/3576/3643	7
hsa00410	beta-Alanine metabolism	2/294	30/8111	0.296953	0.62098	0.476038	54498/55748	2
hsa05412	Arrhythmogenic right ventricular cardiomyopathy	4/294	77/8111	0.304907	0.62098	0.476038	1832/3691/2697/3673	4
hsa04510	Focal adhesion	9/294	201/8111	0.305722	0.62098	0.476038	330/3918/4638/10398/3691/7057/56034/3673/3914	9
hsa00072	Synthesis and degradation of ketone bodies	1/294	8111-10-01	0.308859	0.62098	0.476038	3157	1
hsa00920	Sulfur metabolism	1/294	8111-10-01	0.308859	0.62098	0.476038	58472	1
hsa00052	Galactose metabolism	2/294	31/8111	0.31049	0.62098	0.476038	2683/2595	2
hsa04710	Circadian rhythm	2/294	31/8111	0.31049	0.62098	0.476038	79365/8553	2
hsa05310	Asthma	2/294	31/8111	0.31049	0.62098	0.476038	958/7124	2
hsa04660	T cell receptor signaling pathway	5/294	104/8111	0.325072	0.645467	0.494809	4792/4790/5530/4794/7124	5
hsa00480	Glutathione metabolism	3/294	57/8111	0.341535	0.673312	0.516155	51056/493869/3418	3
hsa04330	Notch signaling pathway	3/294	59/8111	0.361543	0.707701	0.542517	7089/182/6868	3
hsa05322	Systemic lupus erythematosus	6/294	136/8111	0.371273	0.712071	0.545867	958/718/6737/715/716/7124	6
hsa04730	Long-term depression	3/294	60/8111	0.371515	0.712071	0.545867	8605/773/4067	3
hsa04978	Mineral absorption	3/294	60/8111	0.371515	0.712071	0.545867	4891/4502/4493	3
hsa00350	Tyrosine metabolism	2/294	36/8111	0.377103	0.717795	0.550255	259307/4128	2
hsa00590	Arachidonic acid metabolism	3/294	61/8111	0.381458	0.721113	0.552798	8605/9536/493869	3
hsa00533	Glycosaminoglycan biosynthesis - keratan sulfate	1/294	14/8111	0.403876	0.758298	0.581304	2683	1
hsa05410	Hypertrophic cardiomyopathy	4/294	90/8111	0.412649	0.769534	0.589917	3691/3569/3673/7124	4
hsa00603	Glycosphingolipid biosynthesis - globo and isoglobo series	1/294	15/8111	0.425521	0.788214	0.604237	53947	1
hsa05224	Breast cancer	6/294	147/8111	0.442963	0.815052	0.624811	1870/4791/4616/182/2250/2247	6
hsa04664	Fc epsilon RI signaling pathway	3/294	68/8111	0.449811	0.822172	0.630269	8605/7124/4067	3
hsa05150	Staphylococcus aureus infection	4/294	96/8111	0.461478	0.83564	0.640594	3383/718/715/716	4
hsa04975	Fat digestion and absorption	2/294	43/8111	0.465445	0.83564	0.640594	8613/19	2
hsa00450	Selenocompound metabolism	1/294	17/8111	0.46649	0.83564	0.640594	883	1
hsa04110	Cell cycle	5/294	124/8111	0.469291	0.83564	0.640594	1870/4175/4616/6502/4088	5
hsa05223	Non-small cell lung cancer	3/294	72/8111	0.487497	0.862494	0.66118	1870/4616/3718	3
hsa01524	Platinum drug resistance	3/294	73/8111	0.496725	0.873223	0.669404	330/27113/5366	3
hsa01210	2-Oxocarboxylic acid metabolism	1/294	19/8111	0.504546	0.881358	0.675641	3418	1
hsa00100	Steroid biosynthesis	1/294	20/8111	0.522547	0.887088	0.680033	4047	1
hsa00532	Glycosaminoglycan biosynthesis - chondroitin sulfate / dermatan sulfate	1/294	20/8111	0.522547	0.887088	0.680033	29940	1
hsa00670	One carbon pool by folate	1/294	20/8111	0.522547	0.887088	0.680033	441024	1
hsa00280	Valine, leucine and isoleucine degradation	2/294	48/8111	0.523855	0.887088	0.680033	259307/3157	2
hsa03320	PPAR signaling pathway	3/294	76/8111	0.523896	0.887088	0.680033	10580/3157/79966	3
hsa05030	Cocaine addiction	2/294	49/8111	0.535013	0.896987	0.687621	4790/4128	2
hsa04810	Regulation of actin cytoskeleton	8/294	218/8111	0.537314	0.896987	0.687621	4638/10398/3691/2250/2247/56034/3673/10458	8
hsa04024	cAMP signaling pathway	8/294	219/8111	0.542579	0.896987	0.687621	5141/5337/4792/10398/4790/10846/64399/5142	8
hsa00270	Cysteine and methionine metabolism	2/294	50/8111	0.545992	0.896987	0.687621	259307/883	2
hsa05110	Vibrio cholerae infection	2/294	50/8111	0.545992	0.896987	0.687621	6558/155066	2
hsa03018	RNA degradation	3/294	79/8111	0.550248	0.898629	0.68888	54464/694/87178	3
hsa00983	Drug metabolism - other enzymes	3/294	80/8111	0.558839	0.906634	0.695017	1890/3614/7498	3
hsa04310	Wnt signaling pathway	6/294	166/8111	0.561719	0.906634	0.695017	7089/5530/64321/4088/8061/4919	6
hsa04964	Proximal tubule bicarbonate reclamation	1/294	23/8111	0.572731	0.919034	0.704523	760	1
hsa04120	Ubiquitin mediated proteolysis	5/294	140/8111	0.577522	0.919068	0.704549	330/5371/6502/9246/7324	5
hsa04530	Tight junction	6/294	169/8111	0.579413	0.919068	0.704549	10398/9223/50848/23562/9076/51762	6
hsa04977	Vitamin digestion and absorption	1/294	24/8111	0.588263	0.927774	0.711223	6573	1
hsa04724	Glutamatergic synapse	4/294	114/8111	0.597357	0.936764	0.718114	5337/8605/5530/773	4
hsa00592	alpha-Linolenic acid metabolism	1/294	25/8111	0.603231	0.940632	0.721079	8605	1
hsa04340	Hedgehog signaling pathway	2/294	56/8111	0.608013	0.941476	0.721726	409/64399	2
hsa00790	Folate biosynthesis	1/294	26/8111	0.617657	0.941476	0.721726	2643	1
hsa04071	Sphingolipid signaling pathway	4/294	119/8111	0.631318	0.941476	0.721726	5337/8717/4790/7124	4
hsa04211	Longevity regulating pathway	3/294	89/8111	0.631554	0.941476	0.721726	4790/6648/3643	3
hsa04976	Bile secretion	3/294	89/8111	0.631554	0.941476	0.721726	760/3949/57552	3
hsa01040	Biosynthesis of unsaturated fatty acids	1/294	27/8111	0.631561	0.941476	0.721726	79966	1
hsa05226	Gastric cancer	5/294	149/8111	0.633024	0.941476	0.721726	1870/4616/2250/2247/4088	5
hsa04370	VEGF signaling pathway	2/294	59/8111	0.63653	0.941476	0.721726	8605/5530	2
hsa00650	Butanoate metabolism	1/294	28/8111	0.64496	0.941476	0.721726	3157	1
hsa04020	Calcium signaling pathway	8/294	240/8111	0.646826	0.941476	0.721726	4638/5027/5025/2250/2247/5530/773/56034	8
hsa00561	Glycerolipid metabolism	2/294	61/8111	0.654625	0.941476	0.721726	9388/8613	2
hsa00591	Linoleic acid metabolism	1/294	29/8111	0.657874	0.941476	0.721726	8605	1
hsa04392	Hippo signaling pathway - multiple species	1/294	29/8111	0.657874	0.941476	0.721726	122786	1
hsa04912	GnRH signaling pathway	3/294	93/8111	0.661095	0.941476	0.721726	5337/8605/1839	3
hsa04921	Oxytocin signaling pathway	5/294	154/8111	0.661871	0.941476	0.721726	4638/10398/29904/8605/5530	5
hsa04611	Platelet activation	4/294	124/8111	0.663395	0.941476	0.721726	4638/8605/3673/4067	4
hsa04213	Longevity regulating pathway - multiple species	2/294	62/8111	0.6634	0.941476	0.721726	6648/3643	2
hsa04150	mTOR signaling pathway	5/294	155/8111	0.667461	0.941476	0.721726	6196/2887/6502/3643/7124	5
hsa00020	Citrate cycle (TCA cycle)	1/294	30/8111	0.67032	0.941476	0.721726	3418	1
hsa05217	Basal cell carcinoma	2/294	63/8111	0.671995	0.941476	0.721726	4616/64399	2
hsa04390	Hippo signaling pathway	5/294	157/8111	0.678462	0.9457	0.724965	330/27113/3397/122786/4088	5
hsa05414	Dilated cardiomyopathy	3/294	96/8111	0.682107	0.9457	0.724965	3691/3673/7124	3
hsa04927	Cortisol synthesis and secretion	2/294	65/8111	0.688653	0.9457	0.724965	3949/57552	2
hsa05206	MicroRNAs in cancer	10/294	310/8111	0.693418	0.9457	0.724965	1870/960/90427/4790/5328/7057/8091/10018/1942/4082	10
hsa01522	Endocrine resistance	3/294	98/8111	0.695569	0.9457	0.724965	1870/182/1839	3
hsa04925	Aldosterone synthesis and secretion	3/294	98/8111	0.695569	0.9457	0.724965	25865/3949/4929	3
hsa04720	Long-term potentiation	2/294	67/8111	0.704611	0.949189	0.727639	6196/5530	2
hsa03410	Base excision repair	1/294	33/8111	0.705013	0.949189	0.727639	4913	1
hsa04728	Dopaminergic synapse	4/294	132/8111	0.710671	0.950661	0.728767	5530/409/773/4128	4
hsa04270	Vascular smooth muscle contraction	4/294	133/8111	0.716227	0.950661	0.728767	4638/10398/8605/133	4
hsa05031	Amphetamine addiction	2/294	69/8111	0.719884	0.950661	0.728767	5530/4128	2
hsa05211	Renal cell carcinoma	2/294	69/8111	0.719884	0.950661	0.728767	3091/2113	2
hsa05230	Central carbon metabolism in cancer	2/294	70/8111	0.727269	0.952809	0.730414	3091/3418	2
hsa00500	Starch and sucrose metabolism	1/294	36/8111	0.736067	0.952809	0.730414	2595	1
hsa03030	DNA replication	1/294	36/8111	0.736067	0.952809	0.730414	4175	1
hsa04140	Autophagy - animal	4/294	137/8111	0.73767	0.952809	0.730414	8837/3091/8878/2081	4
hsa00250	Alanine, aspartate and glutamate metabolism	1/294	37/8111	0.745677	0.952809	0.730414	259307	1
hsa04960	Aldosterone-regulated sodium reabsorption	1/294	37/8111	0.745677	0.952809	0.730414	3643	1
hsa05216	Thyroid cancer	1/294	37/8111	0.745677	0.952809	0.730414	4616	1
hsa05214	Glioma	2/294	75/8111	0.761763	0.960359	0.736202	1870/4616	2
hsa00513	Various types of N-glycan biosynthesis	1/294	39/8111	0.763862	0.960359	0.736202	2683	1
hsa05017	Spinocerebellar ataxia	4/294	143/8111	0.767514	0.960359	0.736202	5685/773/7436/2081	4
hsa04971	Gastric acid secretion	2/294	76/8111	0.768191	0.960359	0.736202	4638/760	2
hsa00260	Glycine, serine and threonine metabolism	1/294	40/8111	0.772463	0.960359	0.736202	4128	1
hsa05033	Nicotine addiction	1/294	40/8111	0.772463	0.960359	0.736202	773	1
hsa04721	Synaptic vesicle cycle	2/294	78/8111	0.780599	0.961997	0.737458	773/155066	2
hsa03440	Homologous recombination	1/294	41/8111	0.780751	0.961997	0.737458	4683	1
hsa05010	Alzheimer disease	11/294	369/8111	0.790153	0.968403	0.742368	5685/4790/3552/3553/3569/5530/6868/3643/2081/1435/7124	11
hsa04726	Serotonergic synapse	3/294	115/8111	0.792967	0.968403	0.742368	8605/773/4128	3
hsa04935	Growth hormone synthesis, secretion and action	3/294	119/8111	0.811714	0.98693	0.756571	3717/6772/3726	3
hsa04152	AMPK signaling pathway	3/294	120/8111	0.816171	0.987997	0.757389	29904/79966/3643	3
hsa04919	Thyroid hormone signaling pathway	3/294	121/8111	0.820539	0.988946	0.758117	3091/6772/1734	3
hsa00520	Amino sugar and nucleotide sugar metabolism	1/294	48/8111	0.830927	0.993754	0.761802	80146	1
hsa04540	Gap junction	2/294	88/8111	0.83427	0.993754	0.761802	56034/2697	2
hsa00600	Sphingolipid metabolism	1/294	49/8111	0.837092	0.993754	0.761802	8613	1
hsa04727	GABAergic synapse	2/294	89/8111	0.83893	0.993754	0.761802	92745/773	2
hsa00510	N-Glycan biosynthesis	1/294	50/8111	0.843033	0.994028	0.762012	2683	1
hsa04926	Relaxin signaling pathway	3/294	129/8111	0.852401	0.994028	0.762012	4792/4790/409	3
hsa04022	cGMP-PKG signaling pathway	4/294	167/8111	0.861058	0.994028	0.762012	4638/10398/5530/3643	4
hsa05020	Prion disease	7/294	273/8111	0.87212	0.994028	0.762012	5685/3552/3553/3569/5530/7124/6352	7
hsa04141	Protein processing in endoplasmic reticulum	4/294	171/8111	0.873049	0.994028	0.762012	3301/23645/573/2081	4
hsa04750	Inflammatory mediator regulation of TRP channels	2/294	98/8111	0.875822	0.994028	0.762012	8605/3553	2
hsa01212	Fatty acid metabolism	1/294	57/8111	0.878991	0.994028	0.762012	79966	1
hsa04923	Regulation of lipolysis in adipocytes	1/294	57/8111	0.878991	0.994028	0.762012	3643	1
hsa04371	Apelin signaling pathway	3/294	137/8111	0.87923	0.994028	0.762012	4638/182/4088	3
hsa04910	Insulin signaling pathway	3/294	137/8111	0.87923	0.994028	0.762012	10580/5576/3643	3
hsa04914	Progesterone-mediated oocyte maturation	2/294	100/8111	0.882889	0.994028	0.762012	6196/6793	2
hsa05213	Endometrial cancer	1/294	58/8111	0.883409	0.994028	0.762012	4616	1
hsa05022	Pathways of neurodegeneration - multiple diseases	13/294	475/8111	0.887334	0.994028	0.762012	5685/4790/3552/10133/3553/3569/5530/9246/8878/493869/2081/1435/7124	13
hsa04972	Pancreatic secretion	2/294	102/8111	0.889583	0.994028	0.762012	6558/760	2
hsa04929	GnRH secretion	1/294	64/8111	0.906734	1	0.76659	409	1
hsa00970	Aminoacyl-tRNA biosynthesis	1/294	66/8111	0.913425	1	0.76659	7453	1
hsa04613	Neutrophil extracellular trap formation	4/294	190/8111	0.918566	1	0.76659	9734/4790/718/7097	4
hsa04725	Cholinergic synapse	2/294	113/8111	0.920476	1	0.76659	3717/773	2
hsa04924	Renin secretion	1/294	69/8111	0.922575	1	0.76659	5530	1
hsa04934	Cushing syndrome	3/294	155/8111	0.924376	1	0.76659	1870/3949/57552	3
hsa01240	Biosynthesis of cofactors	3/294	156/8111	0.926363	1	0.76659	2643/129607/441024	3
hsa00982	Drug metabolism - cytochrome P450	1/294	72/8111	0.930761	1	0.76659	4128	1
hsa01230	Biosynthesis of amino acids	1/294	75/8111	0.938084	1	0.76659	3418	1
hsa04918	Thyroid hormone synthesis	1/294	75/8111	0.938084	1	0.76659	493869	1
hsa05415	Diabetic cardiomyopathy	4/294	203/8111	0.940693	1	0.76659	5166/4790/4088/3643	4
hsa05225	Hepatocellular carcinoma	3/294	168/8111	0.946749	1	0.76659	1870/4616/4088	3
hsa04114	Oocyte meiosis	2/294	129/8111	0.951246	1	0.76659	6196/5530	2
hsa04012	ErbB signaling pathway	1/294	85/8111	0.957357	1	0.76659	1839	1
hsa04742	Taste transduction	1/294	86/8111	0.958919	1	0.76659	773	1
hsa04970	Salivary secretion	1/294	93/8111	0.968368	1	0.76659	6558	1
hsa05014	Amyotrophic lateral sclerosis	7/294	364/8111	0.980727	1	0.76659	5685/10133/5530/8878/493869/2081/7124	7
hsa04922	Glucagon signaling pathway	1/294	107/8111	0.981258	1	0.76659	5530	1
hsa05012	Parkinson disease	4/294	249/8111	0.982026	1	0.76659	5685/9246/2081/4128	4
hsa03008	Ribosome biogenesis in eukaryotes	1/294	110/8111	0.983249	1	0.76659	54464	1
hsa01200	Carbon metabolism	1/294	115/8111	0.986109	1	0.76659	3418	1
hsa05016	Huntington disease	5/294	306/8111	0.988206	1	0.76659	5685/27113/6648/493869/2081	5
hsa05034	Alcoholism	2/294	187/8111	0.992413	1	0.76659	9734/4128	2
hsa00190	Oxidative phosphorylation	1/294	133/8111	0.992928	1	0.76659	155066	1
hsa04915	Estrogen signaling pathway	1/294	138/8111	0.994138	1	0.76659	1839	1
hsa04723	Retrograde endocannabinoid signaling	1/294	148/8111	0.995975	1	0.76659	773	1
hsa04080	Neuroactive ligand-receptor interaction	4/294	341/8111	0.998714	1	0.76659	5027/718/5025/133	4
hsa04714	Thermogenesis	1/294	232/8111	0.999832	1	0.76659	6196	1
hsa04740	Olfactory transduction	1/294	443/8111	1	1	0.76659	409	1

## Sheet: ORA pathway treatment 3
ID	Description	GeneRatio	BgRatio	pvalue	p.adjust	qvalue	geneID	Count
hsa04668	TNF signaling pathway	18/41	112/8111	1.25576e-23	1.44413e-21	8.1955e-22	6376/6401/602/2920/3383/4792/6347/6364/8809/7128/6372/3569/7412/2921/6374/2919/1435/9021	18
hsa05323	Rheumatoid arthritis	15/41	93/8111	1.19812e-19	6.88921e-18	3.90967e-18	2920/3383/6387/6347/3552/6364/6372/3569/7097/2921/6374/2919/3576/1435/4050	15
hsa04061	Viral protein interaction with cytokine and cytokine receptor	14/41	100/8111	1.96628e-17	7.5374e-16	4.27752e-16	6376/2920/6387/6347/6364/8809/6372/3569/11009/2921/6374/2919/3576/1435	14
hsa04060	Cytokine-cytokine receptor interaction	18/41	295/8111	7.04811e-16	2.02633e-14	1.14996e-14	6376/2920/6387/1440/6347/3552/6364/9173/8809/6372/3569/11009/2921/6374/2919/3576/1435/4050	18
hsa04657	IL-17 signaling pathway	1941-12-01	94/8111	1.71076e-14	3.93474e-13	2.23299e-13	2920/4792/1440/6347/6364/7128/6372/3569/2921/6374/2919/3576	12
hsa04064	NF-kappa B signaling pathway	1941-10-01	104/8111	6.23605e-11	1.19524e-09	6.78307e-10	2920/3383/4792/6387/7128/7412/2921/2919/3576/4050	10
hsa05144	Malaria	1941-08-01	50/8111	9.51227e-11	1.56273e-09	8.86858e-10	6401/3383/1440/6347/3569/7097/7412/3576	8
hsa05134	Legionellosis	1941-08-01	57/8111	2.8541e-10	4.10277e-09	2.32834e-09	2920/4792/718/3569/7097/2921/2919/3576	8
hsa05417	Lipid and atherosclerosis	1941-12-01	215/8111	3.55635e-10	4.54423e-09	2.57888e-09	6401/2920/3383/4792/6347/6648/3569/7097/7412/2921/2919/3576	12
hsa04062	Chemokine signaling pathway	1941-11-01	192/8111	1.67037e-09	1.92093e-08	1.09014e-08	6376/2920/4792/6387/6347/6364/6372/2921/6374/2919/3576	11
hsa04621	NOD-like receptor signaling pathway	1941-09-01	181/8111	2.13001e-07	2.22683e-06	1.26374e-06	2920/4792/10135/6347/7128/3569/2921/2919/3576	9
hsa04933	AGE-RAGE signaling pathway in diabetic complications	1941-07-01	100/8111	5.58869e-07	5.35583e-06	3.03946e-06	6401/3383/6347/3552/3569/7412/3576	7
hsa05146	Amoebiasis	1941-07-01	102/8111	6.39987e-07	5.66142e-06	3.21289e-06	2920/3569/7097/2921/2919/3576/3914	7
hsa05133	Pertussis	1941-06-01	76/8111	1.92041e-06	1.57748e-05	8.9523e-06	3552/6372/718/3569/6374/3576	6
hsa05167	Kaposi sarcoma-associated herpesvirus infection	1941-08-01	193/8111	4.33168e-06	3.32096e-05	1.88466e-05	2920/3383/4792/718/3569/2921/2919/3576	8
hsa05142	Chagas disease	1941-06-01	102/8111	1.07389e-05	7.71862e-05	4.38036e-05	4792/6347/718/3569/7097/3576	6
hsa05164	Influenza A	1941-07-01	172/8111	2.08852e-05	0.000141282	8.01785e-05	3383/4792/6347/3552/3569/3576/9021	7
hsa05120	Epithelial cell signaling in Helicobacter pylori infection	1941-05-01	70/8111	2.43945e-05	0.000155854	8.84479e-05	2920/4792/2921/2919/3576	5
hsa05152	Tuberculosis	1941-07-01	180/8111	2.80275e-05	0.00016964	9.62718e-05	3552/718/3656/3569/7097/1520/26253	7
hsa05143	African trypanosomiasis	1941-04-01	37/8111	3.28985e-05	0.000189166	0.000107353	6401/3383/3569/7412	4
hsa05171	Coronavirus disease - COVID-19	1941-07-01	232/8111	0.000140244	0.000768001	0.000435845	4792/1440/6347/718/3569/7097/3576	7
hsa05321	Inflammatory bowel disease	1941-04-01	65/8111	0.000304497	0.00159169	0.000903291	3552/8809/3569/7097	4
hsa05140	Leishmaniasis	1941-04-01	77/8111	0.000582589	0.00288685	0.00163831	4792/3552/718/7097	4
hsa05162	Measles	1941-05-01	139/8111	0.000627577	0.00288685	0.00163831	4792/3552/7128/3569/7097	5
hsa05418	Fluid shear stress and atherosclerosis	1941-05-01	139/8111	0.000627577	0.00288685	0.00163831	6401/3383/6347/3552/7412	5
hsa05163	Human cytomegalovirus infection	1941-06-01	225/8111	0.000850112	0.00376011	0.00213388	6376/4792/6387/6347/3569/3576	6
hsa04640	Hematopoietic cell lineage	1941-04-01	99/8111	0.00149585	0.00637123	0.00361571	1440/3552/3569/1435	4
hsa04620	Toll-like receptor signaling pathway	1941-04-01	104/8111	0.00179424	0.00711507	0.00403784	4792/3569/7097/3576	4
hsa04625	C-type lectin receptor signaling pathway	1941-04-01	104/8111	0.00179424	0.00711507	0.00403784	602/4792/3569/26253	4
hsa04670	Leukocyte transendothelial migration	1941-04-01	114/8111	0.00251087	0.00962502	0.00546225	3383/6387/23562/7412	4
hsa05169	Epstein-Barr virus infection	1941-05-01	202/8111	0.00329615	0.0122277	0.00693927	3383/4792/7128/3569/7097	5
hsa04380	Osteoclast differentiation	1941-04-01	128/8111	0.00381516	0.0137107	0.00778091	4792/3552/1435/9021	4
hsa05135	Yersinia infection	1941-04-01	137/8111	0.00486108	0.0169401	0.00961361	4792/6347/3569/3576	4
hsa04514	Cell adhesion molecules	1941-04-01	149/8111	0.00653516	0.0221042	0.0125443	6401/3383/23562/7412	4
hsa04932	Non-alcoholic fatty liver disease	1941-04-01	155/8111	0.00750039	0.0246441	0.0139857	3552/3569/3576/9021	4
hsa04630	JAK-STAT signaling pathway	1941-04-01	162/8111	0.00874067	0.0271669	0.0154174	1440/3569/11009/9021	4
hsa05161	Hepatitis B	1941-04-01	162/8111	0.00874067	0.0271669	0.0154174	4792/3569/7097/3576	4
hsa05202	Transcriptional misregulation in cancer	1941-04-01	192/8111	0.0155642	0.0471021	0.0267307	604/3569/64332/3576	4
hsa05130	Pathogenic Escherichia coli infection	1941-04-01	197/8111	0.0169549	0.0487639	0.0276738	4792/3569/23562/3576	4
hsa04931	Insulin resistance	1941-03-01	108/8111	0.0169614	0.0487639	0.0276738	4792/3569/9021	3
hsa05145	Toxoplasmosis	1941-03-01	112/8111	0.0186751	0.0517315	0.0293579	4792/7097/3914	3
hsa05332	Graft-versus-host disease	1941-02-01	42/8111	0.0188932	0.0517315	0.0293579	3552/3569	2
hsa04672	Intestinal immune network for IgA production	1941-02-01	49/8111	0.0252395	0.0675011	0.0383072	6387/3569	2
hsa04068	FoxO signaling pathway	1941-03-01	131/8111	0.0280934	0.073426	0.0416697	6648/604/3569	3
hsa04151	PI3K-Akt signaling pathway	1941-05-01	354/8111	0.031775	0.0812027	0.046083	1440/3569/7097/1435/3914	5
hsa05132	Salmonella infection	1941-04-01	249/8111	0.0361159	0.0902898	0.05124	4792/3569/7097/3576	4
hsa05168	Herpes simplex virus 1 infection	1941-06-01	498/8111	0.0374964	0.0917466	0.0520667	4792/6347/718/3569/7097/9021	6
hsa04623	Cytosolic DNA-sensing pathway	1941-02-01	63/8111	0.0401038	0.096082	0.0545271	4792/3569	2
hsa04145	Phagosome	1941-03-01	152/8111	0.0409536	0.0961157	0.0545462	718/7097/1520	3
hsa04218	Cellular senescence	1941-03-01	156/8111	0.0436905	0.100092	0.056803	3552/3569/3576	3
hsa05160	Hepatitis C	1941-03-01	157/8111	0.0443888	0.100092	0.056803	4792/23562/9021	3
hsa04920	Adipocytokine signaling pathway	1941-02-01	69/8111	0.0472732	0.104546	0.0593307	4792/9021	2
hsa04622	RIG-I-like receptor signaling pathway	1941-02-01	70/8111	0.0485109	0.10526	0.0597354	4792/3576	2
hsa04610	Complement and coagulation cascades	1941-02-01	85/8111	0.0684196	0.145708	0.0826904	7035/718	2
hsa05235	PD-L1 expression and PD-1 checkpoint pathway in cancer	1941-02-01	89/8111	0.0741192	0.154976	0.08795	4792/7097	2
hsa05222	Small cell lung cancer	1941-02-01	92/8111	0.0784917	0.161188	0.0914753	4792/3914	2
hsa05150	Staphylococcus aureus infection	1941-02-01	96/8111	0.0844459	0.170373	0.0966878	3383/718	2
hsa05166	Human T-cell leukemia virus 1 infection	1941-03-01	219/8111	0.0980237	0.194357	0.110299	3383/4792/3569	3
hsa04659	Th17 cell differentiation	1941-02-01	107/8111	0.101492	0.197824	0.112266	4792/3569	2
hsa04722	Neurotrophin signaling pathway	1941-02-01	119/8111	0.121074	0.232059	0.131695	4792/3656	2
hsa05131	Shigellosis	1941-03-01	246/8111	0.126994	0.239415	0.135869	4792/718/3576	3
hsa01523	Antifolate resistance	1941-01-01	31/8111	0.145629	0.270119	0.153294	3569	1
hsa04210	Apoptosis	1941-02-01	136/8111	0.150238	0.274244	0.155635	4792/1520	2
hsa00760	Nicotinate and nicotinamide metabolism	1941-01-01	35/8111	0.162842	0.292607	0.166056	10135	1
hsa05219	Bladder cancer	1941-01-01	41/8111	0.188029	0.332666	0.18879	3576	1
hsa04217	Necroptosis	1941-02-01	159/8111	0.19163	0.333901	0.189491	3552/7128	2
hsa04940	Type I diabetes mellitus	1941-01-01	43/8111	0.196259	0.336862	0.191171	3552	1
hsa04930	Type II diabetes mellitus	1941-01-01	46/8111	0.208452	0.352528	0.200062	9021	1
hsa04979	Cholesterol metabolism	1941-01-01	50/8111	0.224428	0.374047	0.212274	9388	1
hsa04613	Neutrophil extracellular trap formation	1941-02-01	190/8111	0.249434	0.409785	0.232555	718/7097	2
hsa05416	Viral myocarditis	1941-01-01	60/8111	0.263006	0.425995	0.241755	3383	1
hsa00561	Glycerolipid metabolism	1941-01-01	61/8111	0.266759	0.426073	0.241799	9388	1
hsa04213	Longevity regulating pathway - multiple species	1941-01-01	62/8111	0.270493	0.42612	0.241825	6648	1
hsa05203	Viral carcinogenesis	1941-02-01	204/8111	0.275847	0.428681	0.243279	4792/718	2
hsa05010	Alzheimer disease	1941-03-01	369/8111	0.285873	0.438338	0.248759	3552/3569/1435	3
hsa05170	Human immunodeficiency virus 1 infection	1941-02-01	212/8111	0.290944	0.440244	0.249841	4792/7097	2
hsa04917	Prolactin signaling pathway	1941-01-01	70/8111	0.299709	0.447617	0.254025	9021	1
hsa05220	Chronic myeloid leukemia	1941-01-01	76/8111	0.320868	0.473075	0.268473	4792	1
hsa04612	Antigen processing and presentation	1941-01-01	78/8111	0.327782	0.476118	0.2702	1520	1
hsa01521	EGFR tyrosine kinase inhibitor resistance	1941-01-01	79/8111	0.331213	0.476118	0.2702	3569	1
hsa04146	Peroxisome	1941-01-01	82/8111	0.341404	0.478798	0.27172	6648	1
hsa04662	B cell receptor signaling pathway	1941-01-01	82/8111	0.341404	0.478798	0.27172	4792	1
hsa04512	ECM-receptor interaction	1941-01-01	88/8111	0.361332	0.497671	0.282431	3914	1
hsa04211	Longevity regulating pathway	1941-01-01	89/8111	0.364596	0.497671	0.282431	6648	1
hsa05410	Hypertrophic cardiomyopathy	1941-01-01	90/8111	0.367844	0.497671	0.282431	3569	1
hsa04658	Th1 and Th2 cell differentiation	1941-01-01	92/8111	0.37429	0.500504	0.284039	4792	1
hsa05215	Prostate cancer	1941-01-01	97/8111	0.390127	0.515686	0.292654	4792	1
hsa05020	Prion disease	1941-02-01	273/8111	0.403795	0.525989	0.298502	3552/3569	2
hsa04974	Protein digestion and absorption	1941-01-01	103/8111	0.408616	0.525989	0.298502	1303	1
hsa04660	T cell receptor signaling pathway	1941-01-01	104/8111	0.411644	0.525989	0.298502	4792	1
hsa04066	HIF-1 signaling pathway	1941-01-01	109/8111	0.426557	0.539056	0.305917	3569	1
hsa05022	Pathways of neurodegeneration - multiple diseases	1941-03-01	475/8111	0.43394	0.542425	0.307829	3552/3569/1435	3
hsa04010	MAPK signaling pathway	1941-02-01	294/8111	0.440925	0.54523	0.309421	3552/1435	2
hsa04935	Growth hormone synthesis, secretion and action	1941-01-01	119/8111	0.455287	0.557	0.3161	9021	1
hsa04142	Lysosome	1941-01-01	128/8111	0.479939	0.578126	0.32809	1520	1
hsa04926	Relaxin signaling pathway	1941-01-01	129/8111	0.48261	0.578126	0.32809	4792	1
hsa04650	Natural killer cell mediated cytotoxicity	1941-01-01	131/8111	0.487912	0.578452	0.328275	3383	1
hsa04270	Vascular smooth muscle contraction	1941-01-01	133/8111	0.493161	0.578709	0.328421	10203	1
hsa05322	Systemic lupus erythematosus	1941-01-01	136/8111	0.500936	0.579026	0.328601	718	1
hsa04910	Insulin signaling pathway	1941-01-01	137/8111	0.503501	0.579026	0.328601	9021	1
hsa04120	Ubiquitin mediated proteolysis	1941-01-01	140/8111	0.511121	0.58197	0.330271	9021	1
hsa04080	Neuroactive ligand-receptor interaction	1941-02-01	341/8111	0.519406	0.585605	0.332334	10203/718	2
hsa04072	Phospholipase D signaling pathway	1941-01-01	148/8111	0.530888	0.59274	0.336383	3576	1
hsa04530	Tight junction	1941-01-01	169/8111	0.57914	0.640396	0.363428	23562	1
hsa04360	Axon guidance	1941-01-01	182/8111	0.606546	0.664313	0.377001	6387	1
hsa04510	Focal adhesion	1941-01-01	201/8111	0.643495	0.698131	0.396193	3914	1
hsa05205	Proteoglycans in cancer	1941-01-01	205/8111	0.65083	0.699491	0.396965	7097	1
hsa04015	Rap1 signaling pathway	1941-01-01	210/8111	0.659793	0.699701	0.397084	1435	1
hsa05207	Chemical carcinogenesis - receptor activation	1941-01-01	212/8111	0.663315	0.699701	0.397084	604	1
hsa04810	Regulation of actin cytoskeleton	1941-01-01	218/8111	0.673669	0.699701	0.397084	6387	1
hsa04024	cAMP signaling pathway	1941-01-01	219/8111	0.675364	0.699701	0.397084	4792	1
hsa04014	Ras signaling pathway	1941-01-01	232/8111	0.696634	0.715293	0.405933	1435	1
hsa04144	Endocytosis	1941-01-01	252/8111	0.726728	0.73959	0.419722	80223	1
hsa05016	Huntington disease	1941-01-01	306/8111	0.794169	0.801135	0.454649	6648	1
hsa05165	Human papillomavirus infection	1941-01-01	331/8111	0.819599	0.819599	0.465127	3914	1

## Sheet: ORA pathway treatment 4
ID	Description	GeneRatio	BgRatio	pvalue	p.adjust	qvalue	geneID	Count
hsa04668	TNF signaling pathway	39/372	112/8111	9.33196e-25	2.67827e-22	1.9548e-22	8837/6376/6401/330/355/7133/5291/7185/7132/602/2920/3383/4792/208/6347/4790/329/6364/8809/7128/3659/3553/3569/7412/2921/6374/2919/197259/3627/2353/3726/3725/1435/9021/6300/4217/4049/7124/6352	39
hsa04064	NF-kappa B signaling pathway	27/372	104/8111	7.31014e-14	1.049e-11	7.65641e-12	8837/330/7185/7132/4791/2920/1540/3383/4616/4792/10673/5971/4790/329/1647/7128/3553/148022/7099/8915/7412/2921/2919/3576/4049/4050/7124	27
hsa04621	NOD-like receptor signaling pathway	33/372	181/8111	5.5886e-12	5.34642e-10	3.90221e-10	330/2920/57506/4938/4792/8767/4793/6347/4790/24145/329/2635/2633/7128/3553/148022/3569/10010/7099/3708/115362/2634/115361/3428/2921/2919/3576/3725/29110/6300/7124/10628/6352	33
hsa05417	Lipid and atherosclerosis	34/372	215/8111	1.56236e-10	1.121e-08	8.18185e-09	6401/355/5291/7132/2920/3383/4792/208/6347/4790/6648/4780/3553/148022/3569/10010/7099/7097/5451/3708/7412/2921/2919/3576/2353/1649/3725/2081/29110/6256/6300/4217/7124/6352	34
hsa05323	Rheumatoid arthritis	21/372	93/8111	7.88255e-10	3.26266e-08	2.38133e-08	2920/3383/10673/6347/51561/3552/6364/3553/3569/7099/7097/2921/6374/2919/3576/2353/3725/1435/4050/7124/6352	21
hsa05142	Chagas disease	22/372	102/8111	7.88652e-10	3.26266e-08	2.38133e-08	8837/355/5291/7132/4792/208/6347/4790/3553/148022/3569/7099/7097/5519/9630/3460/3576/2353/3725/6300/7124/6352	22
hsa05164	Influenza A	29/372	172/8111	7.95771e-10	3.26266e-08	2.38133e-08	355/5291/7132/57506/4938/3383/4792/8480/55916/4793/208/6347/4790/3552/64135/3553/148022/91543/3569/7099/3460/10482/3627/3576/29110/71/9021/7124/6352	29
hsa04210	Apoptosis	25/372	136/8111	1.9249e-09	6.90558e-08	5.0402e-08	8837/330/355/5291/7185/7132/4616/4792/208/27113/4790/329/1647/5366/3708/10018/1520/2353/1649/3725/2081/71/4217/1616/7124	25
hsa04657	IL-17 signaling pathway	20/372	94/8111	6.08193e-09	1.93946e-07	1.41556e-07	2920/4792/1440/6347/4790/6364/7128/3553/3569/2921/6374/2919/3627/3576/2353/8061/3725/29110/6300/7124	20
hsa04061	Viral protein interaction with cytokine and cytokine receptor	20/372	100/8111	1.87156e-08	5.37139e-07	3.92043e-07	6376/7133/7132/2920/6347/6364/8809/3569/3570/2921/6374/2919/3627/6373/3576/8793/1435/4049/7124/6352	20
hsa04932	Non-alcoholic fatty liver disease	25/372	155/8111	3.07206e-08	8.01528e-07	5.85014e-07	355/5291/7132/208/4790/3552/3553/3569/10018/3570/3576/2353/3643/1649/22877/3725/2081/9021/6256/6300/4217/4513/4519/4512/7124	25
hsa05169	Epstein-Barr virus infection	28/372	202/8111	1.30372e-07	3.06664e-06	2.23826e-06	864/355/5291/4791/57506/4938/3383/4616/4792/4793/5971/898/208/4790/3280/1647/7128/1026/3569/7097/4794/10018/6890/3627/3725/29110/6300/7124	28
hsa05222	Small cell lung cancer	18/372	92/8111	1.38907e-07	3.06664e-06	2.23826e-06	330/5291/3909/7185/3918/4616/4792/898/208/4790/329/1647/1026/3911/1030/6256/3908/3914	18
hsa04380	Osteoclast differentiation	21/372	128/8111	2.981e-07	6.11104e-06	4.46029e-06	9846/5291/7132/2355/4791/1540/4792/5971/208/4790/3552/3553/3460/2353/3726/8061/3725/1435/9021/6300/7124	21
hsa04933	AGE-RAGE signaling pathway in diabetic complications	18/372	100/8111	5.17308e-07	9.89783e-06	7.22417e-06	6401/5291/3383/208/6347/4790/3552/1958/3553/3569/2308/7412/3576/5581/3725/7056/6300/7124	18
hsa04620	Toll-like receptor signaling pathway	18/372	104/8111	9.4607e-07	1.59719e-05	1.16575e-05	5291/4792/208/4790/3553/148022/3569/7099/7097/3627/6373/3576/2353/3725/29110/6300/7124/6352	18
hsa04625	C-type lectin receptor signaling pathway	18/372	104/8111	9.4607e-07	1.59719e-05	1.16575e-05	5291/602/4791/1540/4792/5971/208/4790/51561/3659/3553/3569/8915/3708/26253/3725/6300/7124	18
hsa05418	Fluid shear stress and atherosclerosis	21/372	139/8111	1.22184e-06	1.89698e-05	1.38456e-05	6401/5291/7132/4208/3383/5155/208/6347/4790/3552/4780/6385/3553/7412/2353/3725/7056/71/6300/4217/7124	21
hsa05134	Legionellosis	13/372	57/8111	1.25584e-06	1.89698e-05	1.38456e-05	1195/4791/2920/4792/4790/3553/3569/7099/7097/2921/2919/3576/7124	13
hsa05133	Pertussis	15/372	76/8111	1.38312e-06	1.98477e-05	1.44863e-05	4790/51561/3552/3659/3553/148022/3569/7099/6374/3576/2353/3725/716/6300/7124	15
hsa04010	MAPK signaling pathway	33/372	294/8111	1.47363e-06	2.01396e-05	1.46993e-05	355/7132/4791/4208/285/4616/5155/994/5971/208/8605/8649/4790/80824/3552/1647/3553/1848/773/59283/1969/9064/1942/2353/3643/1649/3725/1435/1850/6300/4217/1616/7124	33
hsa05235	PD-L1 expression and PD-1 checkpoint pathway in cancer	16/372	89/8111	2.27519e-06	2.96809e-05	2.16633e-05	5291/4792/4793/208/4790/29126/55509/148022/7099/7097/4794/3460/116071/2353/3725/6300	16
hsa05160	Hepatitis C	22/372	157/8111	2.49281e-06	3.11059e-05	2.27033e-05	8837/5010/355/5291/7132/57506/4938/4792/208/24146/4790/1026/148022/91543/5519/23562/9076/3627/29110/9021/6256/7124	22
hsa04622	RIG-I-like receptor signaling pathway	14/372	70/8111	2.64167e-06	3.159e-05	2.30567e-05	1540/57506/4792/4793/79132/4790/64135/10010/64343/3627/3576/29110/6300/7124	14
hsa05146	Amoebiasis	17/372	102/8111	3.26473e-06	3.74792e-05	2.7355e-05	5291/3909/3918/2920/4790/3553/3911/3569/7099/7097/9630/2921/2919/3576/3908/3914/7124	17
hsa05135	Yersinia infection	20/372	137/8111	3.78893e-06	4.18239e-05	3.05262e-05	5291/4792/208/6347/4790/3553/148022/3569/7099/8394/3576/2353/147179/10458/3725/29110/71/23396/6300/7124	20
hsa05162	Measles	20/372	139/8111	4.75627e-06	5.05574e-05	3.69005e-05	355/5291/57506/4938/4792/4793/898/208/27113/4790/3552/64135/7128/3553/3569/7099/7097/2353/3725/29110	20
hsa05202	Transcriptional misregulation in cancer	24/372	192/8111	6.7448e-06	6.91342e-05	5.04592e-05	330/7185/4208/905/4616/4790/7704/329/604/1647/1026/3569/1848/5546/64332/7403/2308/2313/2078/5966/3576/4086/1649/6256	24
hsa05145	Toxoplasmosis	17/372	112/8111	1.20001e-05	0.000112326	8.19835e-05	330/3909/3918/7132/4792/4793/208/4790/329/3911/7099/7097/3460/6300/3908/3914/7124	17
hsa05144	Malaria	11/372	50/8111	1.21051e-05	0.000112326	8.19835e-05	6401/3383/1440/6347/3553/3569/7099/7097/7412/3576/7124	11
hsa04060	Cytokine-cytokine receptor interaction	31/372	295/8111	1.21327e-05	0.000112326	8.19835e-05	6376/355/7133/7132/2920/10673/1440/6347/51561/3552/6364/8809/3553/8200/3569/3557/3460/3570/2921/6374/2919/3575/3627/6373/3576/8793/1435/4049/4050/7124/6352	31
hsa05171	Coronavirus disease - COVID-19	26/372	232/8111	2.04206e-05	0.000183147	0.000133674	51121/5291/7132/57506/4938/4792/4793/1440/6347/4790/1839/64135/3553/3569/7099/7097/3570/115004/3627/3576/2353/3725/716/29110/6300/7124	26
hsa04931	Insulin resistance	16/372	108/8111	2.95227e-05	0.000256758	0.000187401	5291/7132/4792/57761/208/4790/1374/9882/3569/2308/3643/5581/22877/9021/5770/7124	16
hsa05130	Pathogenic Escherichia coli infection	23/372	197/8111	3.21811e-05	0.000271646	0.000198267	9265/5010/355/7132/25/4792/4793/24146/4790/10802/3553/3569/7099/23562/9076/3576/2353/147179/10458/3725/71/6300/7124	23
hsa05167	Kaposi sarcoma-associated herpesvirus infection	22/372	193/8111	6.88311e-05	0.000564415	0.000411951	355/5291/7132/2920/3383/285/5155/4792/208/4790/1026/148022/3569/3708/1827/2921/2919/3576/2353/3725/29110/6300	22
hsa05161	Hepatitis B	19/372	162/8111	0.000147056	0.00117236	0.000855677	355/5291/57506/4792/898/208/4790/64135/1026/148022/3569/7099/7097/3576/2353/3725/29110/6300/7124	19
hsa05321	Inflammatory bowel disease	11/372	65/8111	0.000156207	0.00121166	0.000884361	4790/51561/3552/8809/3553/3569/7099/7097/3460/3725/7124	11
hsa05140	Leishmaniasis	12/372	77/8111	0.000178902	0.00135118	0.000986188	4792/4793/4790/3552/3553/7099/7097/3460/2353/3725/6300/7124	12
hsa04218	Cellular senescence	18/372	156/8111	0.00026881	0.0019372	0.00141391	5291/4616/4683/898/208/4790/3552/1647/1026/2113/3569/1030/1029/2308/3708/3576/677/6300	18
hsa04920	Adipocytokine signaling pathway	11/372	69/8111	0.000269993	0.0019372	0.00141391	7133/7132/4792/4793/208/4790/1374/4794/9021/6256/7124	11
hsa05166	Human T-cell leukemia virus 1 infection	22/372	219/8111	0.000431176	0.00298313	0.0021773	5291/7132/4791/3383/4792/5971/898/208/4790/1958/1026/2113/3569/1030/1029/2114/4487/2353/8061/3725/4049/7124	22
hsa05132	Salmonella infection	24/372	249/8111	0.000441465	0.00298313	0.0021773	9265/330/5291/7132/4792/57617/8767/8677/208/4790/329/3553/3569/7099/7097/197259/3576/2353/257364/3725/71/113146/6300/7124	24
hsa04115	p53 signaling pathway	11/372	73/8111	0.000446949	0.00298313	0.0021773	355/4616/898/27113/1647/92344/1026/83667/5366/1029/6241	11
hsa04215	Apoptosis - multiple species	7/372	32/8111	0.000501653	0.00327215	0.00238825	330/7132/27113/329/5366/10018/666	7
hsa04623	Cytosolic DNA-sensing pathway	10/372	63/8111	0.00052873	0.00337212	0.00246122	57506/4792/4793/4790/3553/3569/115004/3627/29110/6352	10
hsa05152	Tuberculosis	19/372	180/8111	0.000571969	0.00356859	0.00260462	7132/8767/208/4790/51561/7421/3552/3553/3656/3569/7099/7097/8915/1054/3460/1520/26253/6300/7124	19
hsa05131	Shigellosis	23/372	246/8111	0.000883305	0.0053938	0.00393679	9265/5291/7132/4792/8767/4793/208/4790/3553/7099/8915/92610/2308/3708/115004/3576/5581/3725/29110/71/6300/7124/6352	23
hsa04217	Necroptosis	17/372	159/8111	0.000954209	0.00570538	0.0041642	8837/330/355/7132/1540/51510/128866/8605/329/3552/7128/3553/148022/7099/3460/197259/7124	17
hsa04659	Th17 cell differentiation	13/372	107/8111	0.00116206	0.00680633	0.00496776	4792/4793/4790/51561/3553/3569/4794/3460/3570/2353/3725/6256/6300	13
hsa05120	Epithelial cell signaling in Helicobacter pylori infection	10/372	70/8111	0.00123402	0.00708325	0.00516988	2920/4792/4790/1839/2921/2919/3576/3725/6300/6352	10
hsa05143	African trypanosomiasis	7/372	37/8111	0.00125926	0.0070864	0.00517217	6401/355/3383/3553/3569/7412/7124	7
hsa04066	HIF-1 signaling pathway	13/372	109/8111	0.00138099	0.00762198	0.00556308	5291/285/208/2027/4790/1026/54583/3569/7099/3460/3570/3643/112398	13
hsa05163	Human cytomegalovirus infection	21/372	225/8111	0.00149704	0.00810661	0.0059168	6376/355/5291/7132/4792/208/6347/4790/1026/3553/3569/1029/3708/3570/115004/6890/3576/29110/6300/7124/6352	21
hsa01524	Platinum drug resistance	10/372	73/8111	0.00171085	0.00909287	0.00663664	330/355/5291/208/27113/329/1026/5366/1029/4217	10
hsa05168	Herpes simplex virus 1 infection	37/372	498/8111	0.00231922	0.0119257	0.00870428	330/355/5291/7132/57506/4938/4792/79744/208/6347/4790/329/64135/7755/3553/148022/57693/3569/7097/5451/7553/374928/3460/10482/115004/6890/285268/253639/29110/9021/10308/51710/1616/4049/7124/6352/93474	37
hsa05220	Chronic myeloid leukemia	10/372	76/8111	0.00232697	0.0119257	0.00870428	9846/5291/25/4616/4792/208/4790/1647/1026/1029	10
hsa04068	FoxO signaling pathway	14/372	131/8111	0.00263642	0.0132746	0.00968879	5291/4616/208/6648/604/1647/1026/3569/1030/2308/10018/3575/3643/6300	14
hsa04062	Chemokine signaling pathway	18/372	192/8111	0.00304031	0.0148533	0.0108411	6376/5291/2920/4792/4793/208/6347/4790/6364/2868/2921/6374/2919/3627/6373/3576/2869/6352	18
hsa04722	Neurotrophin signaling pathway	13/372	119/8111	0.00305347	0.0148533	0.0108411	5291/25/4792/8767/4793/208/4790/3656/4794/10782/3725/6300/4217	13
hsa05170	Human immunodeficiency virus 1 infection	19/372	212/8111	0.00389975	0.0186538	0.0136149	355/7133/5291/7132/4792/208/4790/7099/7097/8451/3708/130340/115004/6890/2353/3725/29110/6300/7124	19
hsa05211	Renal cell carcinoma	9/372	69/8111	0.0040342	0.0189806	0.0138534	5291/5155/208/1026/2113/54583/5546/3725/112398	9
hsa05215	Prostate cancer	11/372	97/8111	0.0046829	0.0216773	0.0158217	5291/5155/4792/898/208/4790/1026/2308/2078/4824/367	11
hsa05210	Colorectal cancer	10/372	86/8111	0.00575885	0.0262347	0.019148	5291/4616/208/27113/1647/1026/5366/10018/2353/3725	10
hsa04660	T cell receptor signaling pathway	11/372	104/8111	0.00790099	0.035431	0.0258601	5291/4792/4793/208/4790/8915/4794/2353/3725/6300/7124	11
hsa04928	Parathyroid hormone synthesis, secretion and action	11/372	106/8111	0.00908023	0.0400927	0.0292626	4040/4208/5143/7421/1839/1958/1026/3708/4929/2353/6256	11
hsa00532	Glycosaminoglycan biosynthesis - chondroitin sulfate / dermatan sulfate	4/372	20/8111	0.0117608	0.0511415	0.0373268	64132/29940/55501/55454	4
hsa04662	B cell receptor signaling pathway	9/372	82/8111	0.0124046	0.053136	0.0387826	5291/4792/4793/208/4790/8915/4794/2353/3725	9
hsa05231	Choline metabolism in cancer	10/372	98/8111	0.0140515	0.0593055	0.0432855	5291/5155/208/8605/56261/8394/1609/2353/3725/23396	10
hsa04930	Type II diabetes mellitus	6/372	46/8111	0.0177444	0.0738062	0.0538692	5291/773/3643/5581/9021/7124	6
hsa04151	PI3K-Akt signaling pathway	25/372	354/8111	0.020532	0.0841813	0.0614417	5291/3909/3918/285/5155/898/208/1440/4790/1026/3911/3569/7099/7097/5519/1969/10018/3570/3575/1942/3643/1435/6256/3908/3914	25
hsa05212	Pancreatic cancer	8/372	76/8111	0.0225438	0.0911277	0.0665117	5291/4616/208/4790/1647/1026/675/1029	8
hsa04530	Tight junction	14/372	169/8111	0.0230594	0.0919172	0.0670879	5010/58538/4637/24146/57826/93643/5519/123720/23562/9076/5581/3725/71/4217	14
hsa04658	Th1 and Th2 cell differentiation	9/372	92/8111	0.0247227	0.0971973	0.0709418	864/4792/4793/4790/4794/3460/2353/3725/6300	9
hsa04350	TGF-beta signaling pathway	9/372	94/8111	0.0279676	0.108469	0.0791687	8200/3397/10468/5519/4091/1030/4086/7050/7124	9
hsa05010	Alzheimer disease	25/372	369/8111	0.0320177	0.122521	0.089425	355/5291/7132/4040/208/22943/4790/3552/3553/7482/3569/3708/516/3643/1649/2081/1435/4217/4513/4519/4536/4540/4512/4535/7124	25
hsa04670	Leukocyte transendothelial migration	10/372	114/8111	0.0360331	0.136072	0.0993157	5010/5291/3383/24146/23562/2909/7412/9076/71/6300	10
hsa05224	Breast cancer	12/372	147/8111	0.0373018	0.139034	0.101477	5291/4040/4791/4616/208/3280/1647/1026/7482/675/2353/3725	12
hsa05219	Bladder cancer	5/372	41/8111	0.0381636	0.140423	0.102491	1890/1839/1026/1029/3576	5
hsa04072	Phospholipase D signaling pathway	12/372	148/8111	0.0389901	0.141647	0.103385	9265/9846/5291/5155/208/8605/8394/1609/56894/3576/3643/23396	12
hsa04917	Prolactin signaling pathway	7/372	70/8111	0.0405648	0.145526	0.106216	5291/208/4790/3659/2353/9021/6300	7
hsa05332	Graft-versus-host disease	5/372	42/8111	0.0417564	0.147402	0.107585	355/3552/3553/3569/7124	5
hsa00240	Pyrimidine metabolism	6/372	56/8111	0.0421149	0.147402	0.107585	1890/7372/51251/124583/6241/9583	6
hsa04510	Focal adhesion	15/372	201/8111	0.0428674	0.148228	0.108188	330/5291/3909/3918/5155/208/329/3911/8394/2909/3725/71/23396/3908/3914	15
hsa04940	Type I diabetes mellitus	5/372	43/8111	0.0455468	0.152371	0.111211	355/3552/3553/4049/7124	5
hsa05218	Melanoma	7/372	72/8111	0.0461695	0.152371	0.111211	5291/4616/5155/208/1647/1026/1029	7
hsa05223	Non-small cell lung cancer	7/372	72/8111	0.0461695	0.152371	0.111211	5291/4616/208/1647/1026/1029/6256	7
hsa04071	Sphingolipid signaling pathway	10/372	119/8111	0.0461891	0.152371	0.111211	9846/5291/7132/208/4790/5519/5581/6300/4217/7124	10
hsa05205	Proteoglycans in cancer	15/372	205/8111	0.0494612	0.161311	0.117737	5329/355/5291/208/1839/6385/1026/7482/7099/7097/3708/71/6300/7124/117581	15
hsa01523	Antifolate resistance	4/372	31/8111	0.0515629	0.166276	0.12136	4790/3553/3569/7124	4
hsa05214	Glioma	7/372	75/8111	0.0554666	0.176877	0.129098	5291/4616/5155/208/1647/1026/1029	7
hsa04110	Cell cycle	10/372	124/8111	0.0581233	0.183312	0.133794	25/4616/994/898/51343/1647/1026/1030/1029/5001	10
hsa04014	Ras signaling pathway	16/372	232/8111	0.0670717	0.209235	0.152715	9846/5291/285/25/5155/208/8605/4790/2113/1969/2114/5966/1942/3643/29110/1435	16
hsa04630	JAK-STAT signaling pathway	12/372	162/8111	0.0684802	0.211332	0.154245	5291/5155/208/1440/51561/1026/3569/3460/3570/3575/5771/9021	12
hsa01522	Endocrine resistance	8/372	98/8111	0.080063	0.241874	0.176538	5291/208/1839/1026/1029/2353/3725/6300	8
hsa03015	mRNA surveillance pathway	8/372	98/8111	0.080063	0.241874	0.176538	8731/55916/5519/81608/10482/80335/51585/1479	8
hsa05165	Human papillomavirus infection	21/372	331/8111	0.0813794	0.243291	0.177571	355/5291/3909/3918/7132/898/208/4790/3280/1026/3659/148022/3911/7482/8638/5519/2308/29110/3908/3914/7124	21
hsa04640	Hematopoietic cell lineage	8/372	99/8111	0.0838166	0.247993	0.181004	1440/3552/3553/3569/3570/3575/1435/7124	8
hsa05203	Viral carcinogenesis	14/372	204/8111	0.0855431	0.250519	0.182847	9734/5291/7185/4791/4792/898/4790/1026/2959/5366/1030/1029/5966/3725	14
hsa05216	Thyroid cancer	4/372	37/8111	0.0876566	0.254116	0.185472	4616/1647/1026/6256	4
hsa04664	Fc epsilon RI signaling pathway	6/372	68/8111	0.0906569	0.260185	0.189902	9846/5291/208/8605/6300/7124	6
hsa04921	Oxytocin signaling pathway	11/372	154/8111	0.0959634	0.272688	0.199028	4208/4637/29904/8605/1026/59283/3708/1827/2353/3725/71	11
hsa04390	Hippo signaling pathway	11/372	157/8111	0.106167	0.298724	0.218031	330/27113/329/1490/8200/3397/7482/5519/122786/4086/71	11
hsa05014	Amyotrophic lateral sclerosis	22/372	364/8111	0.111645	0.311088	0.227055	7133/7132/8480/55916/9972/10010/516/10482/1649/2081/29110/71/6300/4217/4513/4519/4536/4540/4512/4535/1616/7124	22
hsa04211	Longevity regulating pathway	7/372	89/8111	0.113288	0.31263	0.228181	5291/208/4790/6648/83667/2308/3643	7
hsa04550	Signaling pathways regulating pluripotency of stem cells	10/372	143/8111	0.1207	0.329914	0.240796	3720/5291/208/84759/3397/7482/6498/9314/4086/6300	10
hsa05020	Prion disease	17/372	273/8111	0.122967	0.332939	0.243004	5291/3552/1958/3553/3569/3708/516/1649/6300/4513/4519/4536/4540/4512/4535/7124/6352	17
hsa05213	Endometrial cancer	5/372	58/8111	0.125831	0.337511	0.24634	5291/4616/208/1647/1026	5
hsa00780	Biotin metabolism	1/372	8111-03-01	0.131392	0.349163	0.254845	54995	1
hsa05415	Diabetic cardiomyopathy	13/372	203/8111	0.140082	0.368839	0.269206	5291/208/4790/9882/516/3643/6300/4513/4519/4536/4540/4512/4535	13
hsa05022	Pathways of neurodegeneration - multiple diseases	27/372	475/8111	0.143789	0.374689	0.273476	355/7133/7132/4040/22943/4790/3552/3553/7482/3569/10010/3708/516/1649/2081/29110/1435/6300/4217/4513/4519/4536/4540/4512/4535/1616/7124	27
hsa05226	Gastric cancer	10/372	149/8111	0.146113	0.374689	0.273476	5291/4040/4616/898/208/1647/1026/7482/1030/6256	10
hsa05225	Hepatocellular carcinoma	11/372	168/8111	0.14873	0.374689	0.273476	5291/4040/4616/208/4780/1647/1026/7482/1029/71/7296	11
hsa00603	Glycosphingolipid biosynthesis - globo and isoglobo series	2/372	15/8111	0.148857	0.374689	0.273476	6482/53947	2
hsa03022	Basal transcription factors	4/372	45/8111	0.149898	0.374689	0.273476	6882/2959/6879/6884	4
hsa03040	Spliceosome	10/372	150/8111	0.150598	0.374689	0.273476	9984/3183/8896/9343/6434/10262/29896/22827/23450/494115	10
hsa01521	EGFR tyrosine kinase inhibitor resistance	6/372	79/8111	0.153566	0.374689	0.273476	5291/5155/208/3569/10018/3570	6
hsa03018	RNA degradation	6/372	79/8111	0.153566	0.374689	0.273476	2027/5393/9924/10950/219988/55802	6
hsa04213	Longevity regulating pathway - multiple species	5/372	62/8111	0.154053	0.374689	0.273476	5291/208/6648/2308/3643	5
hsa04666	Fc gamma R-mediated phagocytosis	7/372	97/8111	0.156581	0.377636	0.275627	9846/5291/208/8605/8394/5581/23396	7
hsa04146	Peroxisome	6/372	82/8111	0.173418	0.413971	0.302146	11264/5264/6648/5825/7498/8800	6
hsa04914	Progesterone-mediated oocyte maturation	7/372	100/8111	0.174531	0.413971	0.302146	5291/994/208/51343/22849/132864/6300	7
hsa04140	Autophagy - animal	9/372	137/8111	0.177054	0.416512	0.304001	8837/5291/208/10010/3708/2081/29110/7405/79065	9
hsa04144	Endocytosis	15/372	252/8111	0.181378	0.420931	0.307226	9265/30846/51510/55738/128866/2868/8394/9922/80223/26119/147179/10193/23396/89853/2869	15
hsa00450	Selenocompound metabolism	2/372	17/8111	0.181866	0.420931	0.307226	51091/7296	2
hsa05221	Acute myeloid leukemia	5/372	67/8111	0.192603	0.442216	0.322761	5291/208/4790/7704/1848	5
hsa04012	ErbB signaling pathway	6/372	85/8111	0.194263	0.442488	0.32296	5291/25/208/1839/1026/3725	6
hsa00061	Fatty acid biosynthesis	2/372	18/8111	0.198748	0.44914	0.327816	51102/54995	2
hsa04512	ECM-receptor interaction	6/372	88/8111	0.215999	0.48431	0.353485	3909/3918/6385/3911/3908/3914	6
hsa05410	Hypertrophic cardiomyopathy	6/372	90/8111	0.230932	0.513778	0.374993	3569/59283/7273/71/3908/7124	6
hsa03460	Fanconi anemia pathway	4/372	54/8111	0.234338	0.517347	0.377598	79728/3280/675/2176	4
hsa04114	Oocyte meiosis	8/372	129/8111	0.239825	0.525418	0.383489	898/22849/26271/132864/5519/3708/367/6300	8
hsa04514	Cell adhesion molecules	9/372	149/8111	0.244499	0.529895	0.386756	6401/5010/3383/24146/29126/6385/23562/7412/9076	9
hsa00232	Caffeine metabolism	1/372	8111-06-01	0.245561	0.529895	0.386756	7498	1
hsa04912	GnRH signaling pathway	6/372	93/8111	0.253912	0.543827	0.396925	8605/1839/1958/3708/3725/6300	6
hsa05412	Arrhythmogenic right ventricular cardiomyopathy	5/372	77/8111	0.27789	0.590773	0.43119	1832/59283/2697/71/3908	5
hsa04150	mTOR signaling pathway	9/372	155/8111	0.281156	0.593323	0.433051	5291/7132/4040/208/8649/83667/7482/3643/7124	9
hsa03060	Protein export	2/372	23/8111	0.284834	0.593455	0.433147	60559/196294	2
hsa04370	VEGF signaling pathway	4/372	59/8111	0.285354	0.593455	0.433147	5291/208/8605/6300	4
hsa03440	Homologous recombination	3/372	41/8111	0.290059	0.597776	0.436301	79728/4683/675	3
hsa04750	Inflammatory mediator regulation of TRP channels	6/372	98/8111	0.293483	0.597776	0.436301	5291/8605/3553/3708/5581/6300	6
hsa04730	Long-term depression	4/372	60/8111	0.295764	0.597776	0.436301	8605/5519/773/3708	4
hsa05416	Viral myocarditis	4/372	60/8111	0.295764	0.597776	0.436301	3383/25/71/3908	4
hsa00534	Glycosaminoglycan biosynthesis - heparan sulfate / heparin	2/372	24/8111	0.302082	0.606276	0.442505	64132/3340	2
hsa04935	Growth hormone synthesis, secretion and action	7/372	119/8111	0.304597	0.607079	0.443091	5291/208/3708/2353/3726/9021/6300	7
hsa04152	AMPK signaling pathway	7/372	120/8111	0.311998	0.617541	0.450727	5291/29904/208/1374/5519/2308/3643	7
hsa04919	Thyroid hormone signaling pathway	7/372	121/8111	0.319433	0.627926	0.458307	5291/208/9882/2308/1827/71/6256	7
hsa04360	Axon guidance	10/372	182/8111	0.32421	0.632982	0.461997	5291/1947/25/1948/1969/7220/223117/1942/27289/2050	10
hsa05217	Basal cell carcinoma	4/372	63/8111	0.327238	0.634575	0.46316	4616/1647/1026/7482	4
hsa05017	Spinocerebellar ataxia	8/372	143/8111	0.33359	0.642553	0.468982	5291/208/2959/773/3708/115209/2081/4217	8
hsa04929	GnRH secretion	4/372	64/8111	0.337782	0.64629	0.47171	5291/208/7220/3708	4
hsa04611	Platelet activation	7/372	124/8111	0.341908	0.649851	0.474309	5291/208/8605/3708/2909/71/6300	7
hsa04310	Wnt signaling pathway	9/372	166/8111	0.351719	0.662164	0.483296	4040/6907/22943/7482/81839/8061/3725/84133/4919	9
hsa00601	Glycosphingolipid biosynthesis - lacto and neolacto series	2/372	27/8111	0.35327	0.662164	0.483296	53947/84002	2
hsa05012	Parkinson disease	13/372	249/8111	0.355307	0.662164	0.483296	4780/3708/516/1649/2081/4217/4513/4519/4536/4540/4512/4535/1616	13
hsa04015	Rap1 signaling pathway	11/372	210/8111	0.369133	0.683491	0.498862	5291/285/5155/208/3397/1969/1942/3643/71/1435/6300	11
hsa04714	Thermogenesis	12/372	232/8111	0.376123	0.69197	0.50505	1374/516/65260/71/6300/4217/4513/4519/4536/4540/4512/4535	12
hsa04926	Relaxin signaling pathway	7/372	129/8111	0.37975	0.692002	0.505074	5291/4792/208/4790/2353/3725/6300	7
hsa05207	Chemical carcinogenesis - receptor activation	11/372	212/8111	0.380963	0.692002	0.505074	5291/208/4790/7421/604/9314/773/367/2353/3725/6256	11
hsa00565	Ether lipid metabolism	3/372	49/8111	0.391635	0.706913	0.515957	8605/79888/5049	3
hsa00410	beta-Alanine metabolism	2/372	30/8111	0.40309	0.71602	0.522604	54498/219	2
hsa00130	Ubiquinone and other terpenoid-quinone biosynthesis	1/372	8111-11-01	0.403551	0.71602	0.522604	154807	1
hsa04979	Cholesterol metabolism	3/372	50/8111	0.404164	0.71602	0.522604	29116/3988/26119	3
hsa00190	Oxidative phosphorylation	7/372	133/8111	0.410155	0.720151	0.525619	516/4513/4519/4536/4540/4512/4535	7
hsa04520	Adherens junction	4/372	71/8111	0.411515	0.720151	0.525619	3643/10458/71/5770	4
hsa00330	Arginine and proline metabolism	3/372	51/8111	0.416618	0.724664	0.528913	54498/4953/219	3
hsa04710	Circadian rhythm	2/372	31/8111	0.419298	0.72493	0.529107	79365/8553	2
hsa05414	Dilated cardiomyopathy	5/372	96/8111	0.451592	0.776089	0.566447	59283/7273/71/3908/7124	5
hsa03450	Non-homologous end-joining	1/372	13/8111	0.457081	0.780847	0.56992	3981	1
hsa04070	Phosphatidylinositol signaling system	5/372	97/8111	0.460621	0.782238	0.570934	5291/8394/1609/3708/23396	5
hsa00564	Glycerophospholipid metabolism	5/372	98/8111	0.469607	0.792807	0.578648	8605/56261/1609/79888/56894	5
hsa00533	Glycosaminoglycan biosynthesis - keratan sulfate	1/372	14/8111	0.482021	0.806992	0.589002	6482	1
hsa00480	Glutathione metabolism	3/372	57/8111	0.489257	0.806992	0.589002	2730/4953/6241	3
hsa01212	Fatty acid metabolism	3/372	57/8111	0.489257	0.806992	0.589002	1374/51102/54995	3
hsa04923	Regulation of lipolysis in adipocytes	3/372	57/8111	0.489257	0.806992	0.589002	5291/208/3643	3
hsa00512	Mucin type O-glycan biosynthesis	2/372	36/8111	0.496692	0.814575	0.594537	6482/2650	2
hsa00983	Drug metabolism - other enzymes	4/372	80/8111	0.503339	0.82017	0.59862	1890/7372/7498/6241	4
hsa00604	Glycosphingolipid biosynthesis - ganglio series	1/372	15/8111	0.505819	0.82017	0.59862	6482	1
hsa04960	Aldosterone-regulated sodium reabsorption	2/372	37/8111	0.511372	0.824515	0.601792	5291/3643	2
hsa05330	Allograft rejection	2/372	38/8111	0.525768	0.838307	0.611858	355/7124	2
hsa05340	Primary immunodeficiency	2/372	38/8111	0.525768	0.838307	0.611858	6890/3575	2
hsa04141	Protein processing in endoplasmic reticulum	8/372	171/8111	0.528928	0.838687	0.612135	3301/23645/80331/10802/4780/1649/2081/4217	8
hsa00561	Glycerolipid metabolism	3/372	61/8111	0.535159	0.843386	0.615565	219/1609/56894	3
hsa04142	Lysosome	6/372	128/8111	0.537768	0.843386	0.615565	27074/3988/4126/130340/1520/9583	6
hsa00230	Purine metabolism	6/372	130/8111	0.553128	0.862759	0.629705	5143/51251/7498/124583/6241/9583	6
hsa04650	Natural killer cell mediated cytotoxicity	6/372	131/8111	0.56072	0.869874	0.634898	355/5291/6452/3383/3460/7124	6
hsa04728	Dopaminergic synapse	6/372	132/8111	0.568252	0.871481	0.636071	208/5519/773/3708/2353/6300	6
hsa04260	Cardiac muscle contraction	4/372	87/8111	0.570183	0.871481	0.636071	59283/4513/4519/4512	4
hsa00511	Other glycan degradation	1/372	18/8111	0.570865	0.871481	0.636071	4126	1
hsa00071	Fatty acid degradation	2/372	43/8111	0.593355	0.891698	0.650827	1374/219	2
hsa04725	Cholinergic synapse	5/372	113/8111	0.597014	0.891698	0.650827	5291/208/773/3708/2353	5
hsa04724	Glutamatergic synapse	5/372	114/8111	0.604895	0.891698	0.650827	8605/54407/773/7220/3708	5
hsa04371	Apelin signaling pathway	6/372	137/8111	0.604939	0.891698	0.650827	4208/208/1490/1958/3708/5581	6
hsa04910	Insulin signaling pathway	6/372	137/8111	0.604939	0.891698	0.650827	5291/208/2308/3643/9021/5770	6
hsa05032	Morphine addiction	4/372	91/8111	0.606052	0.891698	0.650827	5143/2868/773/2869	4
hsa00100	Steroid biosynthesis	1/372	20/8111	0.609412	0.891698	0.650827	3988	1
hsa04137	Mitophagy - animal	3/372	68/8111	0.609524	0.891698	0.650827	3725/29110/79065	3
hsa04915	Estrogen signaling pathway	6/372	138/8111	0.612072	0.891698	0.650827	5291/208/1839/3708/2353/3725	6
hsa02010	ABC transporters	2/372	45/8111	0.618305	0.89623	0.654135	5825/6890	2
hsa00770	Pantothenate and CoA biosynthesis	1/372	21/8111	0.62737	0.902986	0.659065	219	1
hsa05230	Central carbon metabolism in cancer	3/372	70/8111	0.629258	0.902986	0.659065	5291/208/9123	3
hsa04973	Carbohydrate digestion and absorption	2/372	47/8111	0.642063	0.912691	0.666149	5291/208	2
hsa00340	Histidine metabolism	1/372	22/8111	0.644504	0.912691	0.666149	219	1
hsa04613	Neutrophil extracellular trap formation	8/372	190/8111	0.649107	0.912691	0.666149	9734/5291/208/4790/7099/7097/71/6300	8
hsa00280	Valine, leucine and isoleucine degradation	2/372	48/8111	0.653499	0.912691	0.666149	3712/219	2
hsa00562	Inositol phosphate metabolism	3/372	73/8111	0.657551	0.912691	0.666149	5291/8394/23396	3
hsa00515	Mannose type O-glycan biosynthesis	1/372	23/8111	0.660853	0.912691	0.666149	11041	1
hsa04925	Aldosterone synthesis and secretion	4/372	98/8111	0.664253	0.912691	0.666149	490/3708/4929/5581	4
hsa04672	Intestinal immune network for IgA production	2/372	49/8111	0.664642	0.912691	0.666149	10673/3569	2
hsa05030	Cocaine addiction	2/372	49/8111	0.664642	0.912691	0.666149	4790/3725	2
hsa05206	MicroRNAs in cancer	13/372	310/8111	0.671733	0.917294	0.669509	5291/25/5155/994/898/2146/4790/1026/1029/10018/1942/23414/5581	13
hsa00510	N-Glycan biosynthesis	2/372	50/8111	0.675496	0.917294	0.669509	22845/10195	2
hsa04723	Retrograde endocannabinoid signaling	6/372	148/8111	0.679283	0.917294	0.669509	773/3708/6300/4536/4540/4535	6
hsa04913	Ovarian steroidogenesis	2/372	51/8111	0.686062	0.917294	0.669509	8605/3643	2
hsa00592	alpha-Linolenic acid metabolism	1/372	25/8111	0.691335	0.917294	0.669509	8605	1
hsa04261	Adrenergic signaling in cardiomyocytes	6/372	150/8111	0.691784	0.917294	0.669509	490/1390/208/5519/59283/6300	6
hsa04972	Pancreatic secretion	4/372	102/8111	0.694773	0.917294	0.669509	490/7220/3708/219931	4
hsa04612	Antigen processing and presentation	3/372	78/8111	0.701187	0.917294	0.669509	1520/6890/7124	3
hsa00563	Glycosylphosphatidylinositol (GPI)-anchor biosynthesis	1/372	26/8111	0.705535	0.917294	0.669509	93183	1
hsa00790	Folate biosynthesis	1/372	26/8111	0.705535	0.917294	0.669509	2643	1
hsa04950	Maturity onset diabetes of the young	1/372	26/8111	0.705535	0.917294	0.669509	3280	1
hsa04961	Endocrine and other factor-regulated calcium reabsorption	2/372	53/8111	0.706348	0.917294	0.669509	490/7421	2
hsa00062	Fatty acid elongation	1/372	27/8111	0.719084	0.928708	0.677839	51102	1
hsa04934	Cushing syndrome	6/372	155/8111	0.721609	0.928708	0.677839	898/1026/7482/1030/1029/3708	6
hsa01240	Biosynthesis of cofactors	6/372	156/8111	0.727328	0.929589	0.678482	2730/7372/2643/219/54995/154807	6
hsa04922	Glucagon signaling pathway	4/372	107/8111	0.730074	0.929589	0.678482	208/1374/2308/3708	4
hsa00650	Butanoate metabolism	1/372	28/8111	0.732011	0.929589	0.678482	79944	1
hsa00591	Linoleic acid metabolism	1/372	29/8111	0.744344	0.935751	0.68298	8605	1
hsa04392	Hippo signaling pathway - multiple species	1/372	29/8111	0.744344	0.935751	0.68298	122786	1
hsa05016	Huntington disease	12/372	306/8111	0.753691	0.935751	0.68298	27113/6648/3708/516/2081/4217/4513/4519/4536/4540/4512/4535	12
hsa04610	Complement and coagulation cascades	3/372	85/8111	0.754995	0.935751	0.68298	5329/7056/716	3
hsa00053	Ascorbate and aldarate metabolism	1/372	30/8111	0.756112	0.935751	0.68298	219	1
hsa03013	RNA transport	7/372	186/8111	0.756426	0.935751	0.68298	9984/8480/55916/10289/9972/10482/50628	7
hsa03020	RNA polymerase	1/372	31/8111	0.767339	0.936732	0.683696	25885	1
hsa05310	Asthma	1/372	31/8111	0.767339	0.936732	0.683696	7124	1
hsa04978	Mineral absorption	2/372	60/8111	0.768896	0.936732	0.683696	490/7421	2
hsa04540	Gap junction	3/372	88/8111	0.77555	0.936732	0.683696	5155/3708/2697	3
hsa04120	Ubiquitin mediated proteolysis	5/372	140/8111	0.776287	0.936732	0.683696	330/51343/329/8451/9021	5
hsa04136	Autophagy - other	1/372	32/8111	0.77805	0.936732	0.683696	79065	1
hsa04726	Serotonergic synapse	4/372	115/8111	0.780066	0.936732	0.683696	8605/773/7220/3708	4
hsa04022	cGMP-PKG signaling pathway	6/372	167/8111	0.784811	0.938503	0.684988	490/4208/208/3708/3643/5581	6
hsa00310	Lysine degradation	2/372	63/8111	0.791956	0.941338	0.687057	2146/219	2
hsa04024	cAMP signaling pathway	8/372	219/8111	0.793741	0.941338	0.687057	5291/490/4792/208/5143/4790/2353/3725	8
hsa00010	Glycolysis / Gluconeogenesis	2/372	67/8111	0.819536	0.96793	0.706466	2027/219	2
hsa00250	Alanine, aspartate and glutamate metabolism	1/372	37/8111	0.824666	0.969996	0.707974	57494	1
hsa05031	Amphetamine addiction	2/372	69/8111	0.832062	0.972217	0.709596	2353/3725	2
hsa04145	Phagosome	5/372	152/8111	0.833329	0.972217	0.709596	7099/7097/1520/6890/71	5
hsa00513	Various types of N-glycan biosynthesis	1/372	39/8111	0.840451	0.976556	0.712763	10195	1
hsa05033	Nicotine addiction	1/372	40/8111	0.847804	0.979352	0.714803	773	1
hsa04216	Ferroptosis	1/372	41/8111	0.854819	0.979352	0.714803	2730	1
hsa00380	Tryptophan metabolism	1/372	42/8111	0.861511	0.979352	0.714803	219	1
hsa04270	Vascular smooth muscle contraction	4/372	133/8111	0.86573	0.979352	0.714803	4637/8605/3708/5581	4
hsa00860	Porphyrin and chlorophyll metabolism	1/372	43/8111	0.867896	0.979352	0.714803	3052	1
hsa03320	PPAR signaling pathway	2/372	76/8111	0.869957	0.979352	0.714803	1374/6256	2
hsa04971	Gastric acid secretion	2/372	76/8111	0.869957	0.979352	0.714803	3708/71	2
hsa05100	Bacterial invasion of epithelial cells	2/372	77/8111	0.874681	0.979352	0.714803	5291/71	2
hsa04810	Regulation of actin cytoskeleton	7/372	218/8111	0.878973	0.979352	0.714803	5291/5155/8394/2909/10458/71/23396	7
hsa03050	Proteasome	1/372	46/8111	0.885341	0.979352	0.714803	5696	1
hsa03008	Ribosome biogenesis in eukaryotes	3/372	110/8111	0.886531	0.979352	0.714803	55916/10436/10482	3
hsa00514	Other types of O-glycan biosynthesis	1/372	47/8111	0.89063	0.979352	0.714803	283464	1
hsa00620	Pyruvate metabolism	1/372	47/8111	0.89063	0.979352	0.714803	219	1
hsa03420	Nucleotide excision repair	1/372	47/8111	0.89063	0.979352	0.714803	8451	1
hsa00270	Cysteine and methionine metabolism	1/372	50/8111	0.90508	0.987673	0.720876	2730	1
hsa05110	Vibrio cholerae infection	1/372	50/8111	0.90508	0.987673	0.720876	71	1
hsa05320	Autoimmune thyroid disease	1/372	53/8111	0.917626	0.996658	0.727434	355	1
hsa04727	GABAergic synapse	2/372	89/8111	0.920259	0.996658	0.727434	54407/773	2
hsa04340	Hedgehog signaling pathway	1/372	56/8111	0.928517	0.998585	0.728841	1954	1
hsa04970	Salivary secretion	2/372	93/8111	0.931619	0.998585	0.728841	490/3708	2
hsa04330	Notch signaling pathway	1/372	59/8111	0.937972	0.998585	0.728841	3280	1
hsa05150	Staphylococcus aureus infection	2/372	96/8111	0.939116	0.998585	0.728841	3383/716	2
hsa04713	Circadian entrainment	2/372	97/8111	0.941438	0.998585	0.728841	3708/2353	2
hsa00590	Arachidonic acid metabolism	1/372	61/8111	0.943571	0.998585	0.728841	8605	1
hsa05322	Systemic lupus erythematosus	3/372	136/8111	0.952809	0.998585	0.728841	6737/716/7124	3
hsa04927	Cortisol synthesis and secretion	1/372	65/8111	0.953302	0.998585	0.728841	3708	1
hsa00970	Aminoacyl-tRNA biosynthesis	1/372	66/8111	0.955461	0.998585	0.728841	51091	1
hsa04720	Long-term potentiation	1/372	67/8111	0.957521	0.998585	0.728841	3708	1
hsa04924	Renin secretion	1/372	69/8111	0.961359	0.998585	0.728841	3708	1
hsa04020	Calcium signaling pathway	6/372	240/8111	0.967579	0.998585	0.728841	490/5155/773/3708/9630/219931	6
hsa01230	Biosynthesis of amino acids	1/372	75/8111	0.97092	0.998585	0.728841	2027	1
hsa04918	Thyroid hormone synthesis	1/372	75/8111	0.97092	0.998585	0.728841	3708	1
hsa04721	Synaptic vesicle cycle	1/372	78/8111	0.974775	0.998585	0.728841	773	1
hsa03010	Ribosome	3/372	158/8111	0.97853	0.998585	0.728841	51121/10573/51264	3
hsa04742	Taste transduction	1/372	86/8111	0.982741	0.998585	0.728841	773	1
hsa04976	Bile secretion	1/372	89/8111	0.985032	0.998585	0.728841	6256	1
hsa04916	Melanogenesis	1/372	101/8111	0.991537	0.998585	0.728841	7482	1
hsa04974	Protein digestion and absorption	1/372	103/8111	0.992304	0.998585	0.728841	54407	1
hsa01200	Carbon metabolism	1/372	115/8111	0.995653	0.998585	0.728841	2027	1
hsa05034	Alcoholism	2/372	187/8111	0.998585	0.998585	0.728841	9734/2030	2
