# Supplementary material for: Development of a bioinformatics platform for analysis of quantitative transcriptomics and proteomics data: the OMnalysis
Source: PeerJ. 2021 Nov 9;9:e12415. doi: 10.7717/peerj.12415 (PMC8588854; doi:10.7717/peerj.12415)
Supplement: Supplemental Information 14 [file peerj-09-12415-s014.xlsx]

## Sheet: GSEA pathway treatment 1
ID	Description	setSize	enrichmentScore	NES	pvalue	p.adjust	qvalues	rank	leading_edge	core_enrichment
hsa04060	Cytokine-cytokine receptor interaction	30	0.747898	2.74614	1.85922e-11	1.56174e-09	8.2197e-10	52	tags=73%, list=19%, signal=67%	4050/3576/7124/6376/6372/6347/6364/3557/2919/1440/3627/6374/3553/11009/6373/3552/3569/2921/2920/10673/3575/4049
hsa05323	Rheumatoid arthritis	19	0.78532	2.58555	1.66173e-09	6.97928e-08	3.67331e-08	44	tags=79%, list=16%, signal=71%	4050/3576/7124/6372/6347/6364/2919/6374/3553/3552/3569/7097/2921/2920/10673
hsa04657	IL-17 signaling pathway	18	0.784299	2.559	9.34895e-09	2.41985e-07	1.2736e-07	48	tags=78%, list=17%, signal=69%	3576/7124/6372/6347/6364/2919/1440/3627/6374/3553/3569/2921/2920/7128
hsa04061	Viral protein interaction with cytokine and cytokine receptor	18	0.782226	2.55224	1.15231e-08	2.41985e-07	1.2736e-07	52	tags=83%, list=19%, signal=72%	3576/7124/6376/6372/6347/6364/2919/3627/6374/11009/6373/3569/2921/2920/4049
hsa04668	TNF signaling pathway	26	0.694884	2.4567	7.77364e-08	1.30597e-06	6.87354e-07	52	tags=65%, list=19%, signal=59%	6401/7124/6376/6372/7412/6347/6364/2919/3627/6374/3553/3569/2921/7185/2920/7128/4049
hsa04062	Chemokine signaling pathway	16	0.759193	2.41035	2.63821e-07	3.69349e-06	1.94394e-06	42	tags=69%, list=15%, signal=62%	3576/6376/6372/6347/6364/2919/3627/6374/6373/2921/2920
hsa05146	Amoebiasis	11	0.831117	2.36076	3.24422e-07	3.89307e-06	2.04898e-06	47	tags=91%, list=17%, signal=79%	3576/7124/2919/3553/3569/7097/3918/2921/2920/3914
hsa05144	Malaria	11	0.824536	2.34206	5.49366e-07	5.26768e-06	2.77246e-06	33	tags=82%, list=12%, signal=75%	6401/3576/7124/7412/6347/1440/3553/3569/7097
hsa04933	AGE-RAGE signaling pathway in diabetic complications	10	0.835044	2.31593	5.64394e-07	5.26768e-06	2.77246e-06	29	tags=80%, list=10%, signal=74%	6401/3576/7124/7412/6347/3553/3552/3569
hsa05417	Lipid and atherosclerosis	22	0.658529	2.23816	1.09759e-05	9.21972e-05	4.85248e-05	50	tags=59%, list=18%, signal=53%	6401/3576/7124/7412/6347/2919/3553/3569/7097/5452/2921/2920/6648
hsa04064	NF-kappa B signaling pathway	22	0.644017	2.18884	2.97733e-05	0.00022736	0.000119663	60	tags=64%, list=22%, signal=54%	4050/3576/7124/7412/2919/3553/2921/7185/2920/10673/7128/4049/5971/3383
hsa04620	Toll-like receptor signaling pathway	11	0.753055	2.13902	5.92281e-05	0.000414597	0.000218209	33	tags=64%, list=12%, signal=58%	3576/7124/3627/3553/6373/3569/7097
hsa05135	Yersinia infection	7	0.820801	2.07755	8.62378e-05	0.000557229	0.000293278	29	tags=71%, list=10%, signal=66%	3576/7124/6347/3553/3569
hsa05418	Fluid shear stress and atherosclerosis	10	0.74698	2.07169	9.53573e-05	0.000572144	0.000301128	27	tags=60%, list=10%, signal=56%	6401/7124/7412/6347/3553/3552
hsa05134	Legionellosis	12	0.706158	2.05941	0.000144035	0.000806594	0.000424523	58	tags=75%, list=21%, signal=62%	3576/7124/2919/3553/3569/7097/2921/2920/718
hsa05143	African trypanosomiasis	6	0.822612	1.96755	0.000236093	0.00123949	0.000652362	29	tags=83%, list=10%, signal=76%	6401/7124/7412/3553/3569
hsa05163	Human cytomegalovirus infection	11	0.721014	2.04801	0.00027207	0.00134435	0.000707551	29	tags=55%, list=10%, signal=51%	3576/7124/6376/6347/3553/3569
hsa05152	Tuberculosis	12	0.68612	2.00097	0.000300314	0.00140146	0.000737612	58	tags=75%, list=21%, signal=62%	7124/3553/3552/3569/7097/1520/26253/3656/718
hsa05133	Pertussis	13	0.67079	2.01581	0.000326961	0.00144551	0.000760796	29	tags=54%, list=10%, signal=51%	3576/7124/6372/6374/3553/3552/3569
hsa05142	Chagas disease	10	0.711228	1.97253	0.00044063	0.00177423	0.000933806	33	tags=60%, list=12%, signal=55%	3576/7124/6347/3553/3569/7097
hsa04932	Non-alcoholic fatty liver disease	9	0.718203	1.93488	0.000443558	0.00177423	0.000933806	29	tags=56%, list=10%, signal=51%	3576/7124/3553/3552/3569
hsa05321	Inflammatory bowel disease	7	0.770065	1.94913	0.000532967	0.00202176	0.00106409	33	tags=71%, list=12%, signal=65%	7124/3553/3552/3569/7097
hsa05020	Prion disease	5	0.83115	1.88111	0.000553578	0.00202176	0.00106409	29	tags=80%, list=10%, signal=73%	7124/3553/3552/3569
hsa05171	Coronavirus disease - COVID-19	17	0.622204	1.99879	0.00067701	0.00236953	0.00124712	33	tags=47%, list=12%, signal=44%	3576/7124/6347/1440/3627/3553/3569/7097
hsa05164	Influenza A	16	0.607746	1.92953	0.000894824	0.00300661	0.00158243	29	tags=44%, list=10%, signal=42%	3576/7124/6347/3627/3553/3552/3569
hsa05332	Graft-versus-host disease	5	0.817246	1.84964	0.000934606	0.0030195	0.00158921	29	tags=80%, list=10%, signal=73%	7124/3553/3552/3569
hsa05130	Pathogenic Escherichia coli infection	10	0.670221	1.8588	0.0019143	0.00595562	0.00313453	29	tags=50%, list=10%, signal=46%	3576/7124/3553/23562/3569
hsa04621	NOD-like receptor signaling pathway	22	0.555604	1.88834	0.0021461	0.00643829	0.00338857	48	tags=45%, list=17%, signal=41%	3576/7124/6347/2919/3553/3569/2921/115362/2920/7128
hsa04640	Hematopoietic cell lineage	10	0.630293	1.74807	0.00700948	0.0197266	0.0103824	49	tags=60%, list=18%, signal=51%	7124/1440/3553/3552/3569/3575
hsa05140	Leishmaniasis	7	0.69651	1.76295	0.00704521	0.0197266	0.0103824	58	tags=71%, list=21%, signal=58%	7124/3553/3552/7097/718
hsa05022	Pathways of neurodegeneration - multiple diseases	7	0.691253	1.74964	0.00830847	0.0225133	0.0118491	29	tags=57%, list=10%, signal=53%	7124/3553/3552/3569
hsa05168	Herpes simplex virus 1 infection	16	0.531026	1.68595	0.00947862	0.0248814	0.0130955	58	tags=50%, list=21%, signal=42%	7124/6347/3553/3569/7097/5452/4049/718
hsa05132	Salmonella infection	11	0.604362	1.71667	0.0110854	0.0279395	0.014705	33	tags=45%, list=12%, signal=42%	3576/7124/3553/3569/7097
hsa04940	Type I diabetes mellitus	5	0.728792	1.64945	0.0113088	0.0279395	0.014705	52	tags=80%, list=19%, signal=66%	7124/3553/3552/4049
hsa00330	Arginine and proline metabolism	6	-0.608059	-1.74396	0.0131346	0.0315229	0.016591	114	tags=100%, list=41%, signal=60%	55748/54498/6303/4953/4128
hsa05010	Alzheimer disease	8	0.645015	1.69446	0.0163364	0.0381183	0.0200623	29	tags=50%, list=10%, signal=46%	7124/3553/3552/3569

## Sheet: GSEA pathway treatment 2
ID	Description	setSize	enrichmentScore	NES	pvalue	p.adjust	qvalues	rank	leading_edge	core_enrichment
hsa04060	Cytokine-cytokine receptor interaction	33	0.807625	3.0595	1.99427e-16	1.86682e-14	1.13849e-14	98	tags=85%, list=17%, signal=75%	6376/3627/4050/3576/7124/6372/6373/3557/6347/6364/3553/2919/6374/1440/3552/2921/10673/3575/3569/2920/4049/6352/11009/8743/3624/51561/1435/9235
hsa04061	Viral protein interaction with cytokine and cytokine receptor	18	0.90156	3.00918	2.9632e-16	1.86682e-14	1.13849e-14	57	tags=94%, list=10%, signal=88%	6376/3627/3576/7124/6372/6373/6347/6364/2919/6374/2921/3569/2920/4049/6352/11009/8743
hsa05323	Rheumatoid arthritis	20	0.850169	2.90226	5.92083e-14	2.48675e-12	1.51656e-12	92	tags=95%, list=16%, signal=83%	4050/3576/7124/6372/6347/6364/3553/2919/6374/3552/2921/10673/3569/7097/2920/6352/3383/51561/1435
hsa04668	TNF signaling pathway	30	0.777994	2.88604	2.31763e-13	7.30052e-12	4.45228e-12	74	tags=70%, list=13%, signal=64%	6376/6401/3627/7124/6372/7412/6347/6364/3553/2919/6374/2921/7185/7128/3569/2920/4049/6352/3383/330/3659
hsa04657	IL-17 signaling pathway	19	0.840172	2.84617	3.57173e-12	9.00075e-11	5.48918e-11	43	tags=74%, list=7%, signal=71%	3627/3576/7124/6372/6347/6364/3553/2919/6374/1440/2921/7128/3569/2920
hsa05146	Amoebiasis	11	0.903158	2.6401	1.47534e-10	3.09822e-09	1.88948e-09	47	tags=91%, list=8%, signal=85%	3576/7124/3553/2919/2921/3918/3569/7097/2920/3914
hsa04062	Chemokine signaling pathway	20	0.774988	2.64562	1.16585e-09	2.09854e-08	1.27981e-08	55	tags=60%, list=9%, signal=56%	6376/3627/3576/6372/6373/6347/6364/2919/6374/2921/2920/6352
hsa05417	Lipid and atherosclerosis	28	0.697998	2.56509	2.15142e-08	3.38849e-07	2.0665e-07	68	tags=57%, list=12%, signal=53%	6401/3576/7124/7412/6347/3553/2919/2921/3569/7097/5452/2920/6648/6352/8743/3383
hsa04064	NF-kappa B signaling pathway	27	0.68493	2.49228	1.80022e-07	2.52031e-06	1.53703e-06	79	tags=59%, list=14%, signal=54%	4050/3576/7124/7412/3553/2919/2921/7185/10673/7128/2920/4049/3383/5971/330/4791
hsa05144	Malaria	14	0.78798	2.44555	3.23642e-07	4.07789e-06	2.48694e-06	68	tags=71%, list=12%, signal=65%	6401/3576/7124/7412/6347/3553/1440/3569/7097/3383
hsa04621	NOD-like receptor signaling pathway	30	0.642909	2.38493	4.60719e-07	5.27733e-06	3.21842e-06	119	tags=63%, list=21%, signal=53%	3576/7124/6347/3553/2919/2921/115362/7128/3569/2920/6352/2635/330/115361/2633/8767/2634/9641/5027
hsa04933	AGE-RAGE signaling pathway in diabetic complications	13	0.797031	2.42159	8.15903e-07	8.56698e-06	5.22464e-06	68	tags=69%, list=12%, signal=63%	6401/3576/7124/7412/6347/3553/3552/3569/3383
hsa05133	Pertussis	14	0.756724	2.34855	3.20701e-06	3.10833e-05	1.89564e-05	96	tags=79%, list=17%, signal=67%	3576/7124/6372/3553/6374/3552/3569/3659/718/51561/716
hsa05134	Legionellosis	13	0.775142	2.35508	4.21961e-06	3.79765e-05	2.31603e-05	80	tags=77%, list=14%, signal=68%	3576/7124/3553/2919/2921/3569/7097/2920/4791/718
hsa05152	Tuberculosis	18	0.692732	2.31216	9.2132e-06	7.73909e-05	4.71975e-05	85	tags=61%, list=15%, signal=54%	7124/3553/3552/26253/1520/3569/7097/3656/718/8767/51561
hsa05418	Fluid shear stress and atherosclerosis	10	0.798989	2.27336	1.12647e-05	8.87094e-05	5.41002e-05	23	tags=60%, list=4%, signal=59%	6401/7124/7412/6347/3553/3552
hsa05142	Chagas disease	12	0.722781	2.15756	5.22544e-05	0.000378652	0.000230924	80	tags=67%, list=14%, signal=59%	3576/7124/6347/3553/3569/7097/6352/718
hsa05143	African trypanosomiasis	8	0.800625	2.11227	5.40931e-05	0.000378652	0.000230924	68	tags=75%, list=12%, signal=67%	6401/7124/7412/3553/3569/3383
hsa04620	Toll-like receptor signaling pathway	16	0.672519	2.17872	7.44455e-05	0.000493691	0.000301081	55	tags=50%, list=9%, signal=47%	3627/3576/7124/6373/3553/3569/7097/6352
hsa05020	Prion disease	7	0.82943	2.07718	9.53924e-05	0.000574837	0.000350569	55	tags=71%, list=9%, signal=65%	7124/3553/3552/3569/6352
hsa04932	Non-alcoholic fatty liver disease	9	0.762466	2.09579	9.58061e-05	0.000574837	0.000350569	38	tags=56%, list=7%, signal=53%	3576/7124/3553/3552/3569
hsa04640	Hematopoietic cell lineage	10	0.748082	2.12851	0.000154874	0.000887005	0.000540947	38	tags=60%, list=7%, signal=57%	7124/3553/1440/3552/3575/3569
hsa05321	Inflammatory bowel disease	9	0.738555	2.03006	0.000242535	0.00132867	0.000810299	85	tags=67%, list=15%, signal=58%	7124/3553/3552/3569/7097/51561
hsa05163	Human cytomegalovirus infection	17	0.642848	2.11941	0.000265083	0.00139169	0.000848732	55	tags=41%, list=9%, signal=38%	6376/3576/7124/6347/3553/3569/6352
hsa05135	Yersinia infection	10	0.726799	2.06795	0.000398549	0.00200869	0.00122501	38	tags=50%, list=7%, signal=48%	3576/7124/6347/3553/3569
hsa05164	Influenza A	29	0.517618	1.91265	0.000935612	0.00453412	0.00276517	130	tags=48%, list=22%, signal=39%	3627/3576/7124/6347/3553/3552/3569/6352/8743/3383/64135/9641/23586/91543
hsa05132	Salmonella infection	16	0.61303	1.986	0.000978848	0.00456796	0.00278581	82	tags=50%, list=14%, signal=44%	3576/7124/3553/3569/7097/8743/330/8767
hsa05332	Graft-versus-host disease	7	0.769309	1.92661	0.00111452	0.00501533	0.00305864	38	tags=57%, list=7%, signal=54%	7124/3553/3552/3569
hsa05171	Coronavirus disease - COVID-19	29	0.506833	1.8728	0.0012636	0.00549012	0.0033482	106	tags=41%, list=18%, signal=36%	3627/3576/7124/6347/3553/1440/3569/7097/718/716/64135/9641
hsa04940	Type I diabetes mellitus	7	0.754236	1.88887	0.00183507	0.00770729	0.00470035	45	tags=57%, list=8%, signal=53%	7124/3553/3552/4049
hsa04625	C-type lectin receptor signaling pathway	16	0.597804	1.93667	0.00207487	0.00843334	0.00514314	106	tags=56%, list=18%, signal=47%	7124/3553/26253/3569/5971/3659/4791/51561/9641
hsa04110	Cell cycle	5	-0.747826	-2.02152	0.00369106	0.0145335	0.00886339	151	tags=100%, list=26%, signal=75%	4616/4175/1870/6502
hsa05130	Pathogenic Escherichia coli infection	14	0.60586	1.88033	0.00402846	0.0153814	0.00938047	57	tags=43%, list=10%, signal=40%	3576/7124/3553/23562/3569/8743
hsa04144	Endocytosis	14	-0.434754	-1.93717	0.00461097	0.0170877	0.0104211	183	tags=79%, list=32%, signal=55%	3106/3105/3949/5337/4088/7037/409/26119/112936/10193/116987
hsa05166	Human T-cell leukemia virus 1 infection	21	0.530325	1.83372	0.00496522	0.0178748	0.0109011	175	tags=67%, list=30%, signal=48%	7124/3569/4049/4487/3383/5971/4791/958/8061/3134/3601/4792/2113/3718
hsa05120	Epithelial cell signaling in Helicobacter pylori infection	12	0.60172	1.79618	0.0061798	0.0216293	0.0131908	55	tags=42%, list=9%, signal=39%	3576/2919/2921/2920/6352
hsa01523	Antifolate resistance	5	0.761212	1.69921	0.00694084	0.0236364	0.0144148	38	tags=60%, list=7%, signal=57%	7124/3553/3569
hsa04623	Cytosolic DNA-sensing pathway	8	0.670084	1.76787	0.0078588	0.0260581	0.0158917	123	tags=75%, list=21%, signal=60%	3627/3553/3569/6352/9641/23586
hsa05010	Alzheimer disease	11	0.595324	1.74024	0.0114428	0.0369692	0.022546	38	tags=36%, list=7%, signal=35%	7124/3553/3552/3569
hsa05131	Shigellosis	15	0.529871	1.67667	0.0137214	0.0424517	0.0258895	131	tags=53%, list=23%, signal=42%	3576/7124/3553/6352/718/8767/10318/960
hsa05168	Herpes simplex virus 1 infection	31	0.454367	1.69648	0.0138136	0.0424517	0.0258895	106	tags=39%, list=18%, signal=33%	7124/6347/3553/3569/7097/5452/4049/6352/330/718/64135/9641
hsa05140	Leishmaniasis	10	0.616503	1.75413	0.0142165	0.0426496	0.0260102	80	tags=50%, list=14%, signal=44%	7124/3553/3552/7097/718

## Sheet: GSEA pathway treatment 3
ID	Description	setSize	enrichmentScore	NES	pvalue	p.adjust	qvalues	rank	leading_edge	core_enrichment
hsa04062	Chemokine signaling pathway	11	0.754638	2.22551	0.000107705	0.00290805	0.00215411	18	tags=82%, list=26%, signal=72%	6372/6364/3576/6347/2919/6374/6376/2920/2921
hsa04060	Cytokine-cytokine receptor interaction	18	0.646479	2.20495	0.00034237	0.00410534	0.00304099	31	tags=89%, list=45%, signal=66%	4050/6372/6364/3576/6347/2919/6374/1440/6376/2920/2921/9173/11009/3552/8809/3569
hsa04657	IL-17 signaling pathway	12	0.688604	2.07889	0.000456149	0.00410534	0.00304099	18	tags=75%, list=26%, signal=67%	6372/6364/3576/6347/2919/6374/1440/2920/2921
hsa05323	Rheumatoid arthritis	15	0.580203	1.87728	0.0029499	0.0199118	0.0147495	21	tags=67%, list=30%, signal=59%	4050/6372/6364/3576/6347/2919/6374/2920/2921/7097
hsa04061	Viral protein interaction with cytokine and cytokine receptor	14	0.583163	1.85023	0.00746982	0.040337	0.0298793	18	tags=64%, list=26%, signal=60%	6372/6364/3576/6347/2919/6374/6376/2920/2921

## Sheet: GSEA pathway treatment 4
ID	Description	setSize	enrichmentScore	NES	pvalue	p.adjust	qvalues	rank	leading_edge	core_enrichment
hsa04060	Cytokine-cytokine receptor interaction	31	0.752579	2.94566	3.71662e-12	6.28109e-10	4.42083e-10	113	tags=71%, list=13%, signal=64%	7124/6364/4049/3552/2921/3576/51561/2920/3557/6373/3627/2919/1440/6376/3569/4050/3553/6352/6347/3575/6374/1435
hsa04657	IL-17 signaling pathway	20	0.808035	2.79642	2.67624e-11	1.59214e-09	1.12059e-09	118	tags=80%, list=13%, signal=71%	7124/6364/2921/3576/7128/2920/3627/2919/2353/1440/3569/3553/4790/6347/6374/3725
hsa05323	Rheumatoid arthritis	21	0.804105	2.81981	2.82628e-11	1.59214e-09	1.12059e-09	118	tags=81%, list=13%, signal=72%	7124/6364/3552/2921/3576/51561/2920/2919/2353/3569/4050/3553/6352/6347/6374/1435/3725
hsa04061	Viral protein interaction with cytokine and cytokine receptor	20	0.779491	2.69764	6.36256e-10	2.68818e-08	1.89202e-08	113	tags=75%, list=13%, signal=67%	7124/6364/4049/2921/3576/2920/6373/3627/2919/6376/3569/6352/6347/6374/1435
hsa04668	TNF signaling pathway	39	0.642648	2.63576	5.43071e-09	1.83558e-07	1.29194e-07	147	tags=59%, list=16%, signal=52%	7124/6364/4049/6401/2921/7128/2920/3627/2919/2353/6376/3569/3553/4790/6352/3726/6347/6374/330/1435/3725/355/7412
hsa04062	Chemokine signaling pathway	18	0.764404	2.57985	4.90218e-08	1.38078e-06	9.71835e-07	94	tags=67%, list=11%, signal=61%	6364/2921/3576/2920/6373/3627/2919/6376/4790/6352/6347/6374
hsa05146	Amoebiasis	17	0.74269	2.46145	2.2056e-07	5.32494e-06	3.74786e-06	73	tags=59%, list=8%, signal=55%	7124/3908/2921/3576/2920/2919/3569/3553/4790/3918
hsa04064	NF-kappa B signaling pathway	27	0.647725	2.44248	7.55978e-07	1.597e-05	1.12402e-05	174	tags=67%, list=19%, signal=55%	7124/4049/2921/3576/7128/2920/2919/4050/3553/4790/330/5971/148022/1540/7412/1647/7185/10673
hsa04621	NOD-like receptor signaling pathway	33	0.61147	2.42807	1.11344e-06	2.0908e-05	1.47157e-05	127	tags=52%, list=14%, signal=46%	7124/2921/3576/7128/2920/115362/2919/3569/3553/2635/4790/6352/8767/6347/330/3725/148022
hsa05134	Legionellosis	13	0.767766	2.35929	2.72598e-06	4.6069e-05	3.24248e-05	65	tags=62%, list=7%, signal=58%	7124/2921/3576/2920/2919/3569/3553/4790
hsa05133	Pertussis	15	0.744832	2.39854	5.63431e-06	8.65635e-05	6.09261e-05	127	tags=73%, list=14%, signal=64%	7124/3552/3576/51561/2353/3569/3553/4790/6374/3725/148022
hsa05417	Lipid and atherosclerosis	34	0.56817	2.26217	2.05175e-05	0.00027004	0.000190063	153	tags=50%, list=17%, signal=43%	7124/6401/2921/3576/2920/2919/2353/3569/3553/4790/6352/6347/3725/148022/355/7412/2081
hsa04933	AGE-RAGE signaling pathway in diabetic complications	18	0.676092	2.2818	2.09566e-05	0.00027004	0.000190063	147	tags=61%, list=16%, signal=52%	7124/6401/3552/3576/1958/3569/3553/4790/6347/3725/7412
hsa04640	Hematopoietic cell lineage	8	0.836412	2.19054	2.23702e-05	0.00027004	0.000190063	113	tags=88%, list=13%, signal=77%	7124/3552/1440/3569/3553/3575/1435
hsa04620	Toll-like receptor signaling pathway	18	0.672553	2.26985	2.7557e-05	0.000310476	0.000218522	127	tags=61%, list=14%, signal=54%	7124/3576/6373/3627/2353/3569/3553/4790/6352/3725/148022
hsa05144	Malaria	11	0.745849	2.16808	6.76065e-05	0.000714094	0.000502601	84	tags=64%, list=9%, signal=58%	7124/6401/3576/1440/3569/3553/6347
hsa05152	Tuberculosis	19	0.647469	2.22026	9.69576e-05	0.000963873	0.000678403	81	tags=47%, list=9%, signal=44%	7124/26253/3552/51561/3656/3569/3553/4790/8767
hsa05321	Inflammatory bowel disease	11	0.715288	2.07924	0.000319952	0.003004	0.0021143	118	tags=64%, list=13%, signal=56%	7124/3552/51561/3569/3553/4790/3725
hsa05120	Epithelial cell signaling in Helicobacter pylori infection	10	0.72916	2.03201	0.00060435	0.00537554	0.00378347	167	tags=80%, list=19%, signal=66%	2921/3576/2920/2919/4790/6352/3725/1839
hsa04217	Necroptosis	17	0.606739	2.01087	0.00064078	0.00541459	0.00381095	136	tags=53%, list=15%, signal=46%	7124/3552/7128/3553/8605/330/148022/1540/355
hsa04144	Endocytosis	15	-0.514773	-2.28236	0.000741212	0.00596499	0.00419834	443	tags=100%, list=49%, signal=51%	8394/2868/51510/147179/9265/30846/2869/26119/89853/23396/55738/10193/80223/9922
hsa05143	African trypanosomiasis	7	0.784353	1.97636	0.00078202	0.00600733	0.00422814	147	tags=86%, list=16%, signal=72%	7124/6401/3569/3553/355/7412
hsa05142	Chagas disease	22	0.563415	1.98797	0.00100141	0.0073582	0.00517893	136	tags=50%, list=15%, signal=43%	7124/3576/2353/3569/3553/4790/6352/6347/3725/148022/355
hsa04940	Type I diabetes mellitus	5	0.852809	1.92641	0.00115454	0.0078047	0.00549319	136	tags=100%, list=15%, signal=85%	7124/4049/3552/3553/355
hsa05332	Graft-versus-host disease	5	0.852809	1.92641	0.00115454	0.0078047	0.00549319	136	tags=100%, list=15%, signal=85%	7124/3552/3569/3553/355
hsa04380	Osteoclast differentiation	21	0.561291	1.96832	0.001212	0.00787801	0.00554479	128	tags=48%, list=14%, signal=42%	7124/3552/2353/3553/4790/3726/5971/1435/3725/1540
hsa04625	C-type lectin receptor signaling pathway	18	0.584611	1.97305	0.00127268	0.00796605	0.00560675	128	tags=50%, list=14%, signal=44%	7124/26253/51561/3569/3553/4790/5971/3725/1540
hsa05162	Measles	20	0.558911	1.93426	0.00160936	0.00971363	0.00683675	145	tags=50%, list=16%, signal=43%	3552/7128/2353/27113/3569/3553/4790/3725/355/64135
hsa05135	Yersinia infection	20	0.557606	1.92975	0.00167416	0.00975634	0.00686681	127	tags=45%, list=14%, signal=39%	7124/3576/2353/3569/3553/4790/6347/3725/148022
hsa04622	RIG-I-like receptor signaling pathway	14	0.617913	1.94707	0.00181116	0.0102029	0.0071811	148	tags=57%, list=17%, signal=48%	7124/3576/3627/4790/79132/1540/64135/64343
hsa05171	Coronavirus disease - COVID-19	26	0.505398	1.8852	0.00240898	0.0127989	0.00900824	167	tags=46%, list=19%, signal=39%	7124/3576/3627/2353/1440/3569/3553/4790/6347/3725/64135/1839
hsa05164	Influenza A	29	0.494852	1.89837	0.00242346	0.0127989	0.00900824	145	tags=41%, list=16%, signal=36%	7124/3552/3576/3627/3569/3553/4790/6352/6347/148022/355/64135
hsa04010	MAPK signaling pathway	33	0.470028	1.86643	0.00277765	0.0142249	0.0100119	184	tags=48%, list=21%, signal=40%	7124/3552/2353/3553/4790/773/8605/1848/5971/1435/3725/355/80824/1647/1850/1942
hsa05166	Human T-cell leukemia virus 1 infection	22	0.532211	1.87787	0.00322328	0.0160216	0.0112765	118	tags=41%, list=13%, signal=36%	7124/4049/2353/1958/3569/4790/4487/5971/3725
hsa05418	Fluid shear stress and atherosclerosis	21	0.529388	1.85644	0.00342759	0.0165503	0.0116486	147	tags=43%, list=16%, signal=37%	7124/6401/3552/2353/3553/4790/6347/3725/7412
hsa04152	AMPK signaling pathway	7	-0.671171	-2.12755	0.00370502	0.0170289	0.0119855	300	tags=100%, list=34%, signal=67%	5519/2308/29904/5291/3643/208
hsa05020	Prion disease	17	0.563793	1.86854	0.00373891	0.0170289	0.0119855	68	tags=35%, list=8%, signal=33%	7124/3552/1958/3569/3553/6352
hsa05167	Kaposi sarcoma-associated herpesvirus infection	22	0.527562	1.86146	0.00382898	0.0170289	0.0119855	136	tags=45%, list=15%, signal=40%	2921/3576/2920/2919/2353/3569/4790/3725/148022/355
hsa05163	Human cytomegalovirus infection	21	0.523416	1.8355	0.00398807	0.0172816	0.0121633	84	tags=38%, list=9%, signal=35%	7124/3576/6376/3569/3553/4790/6352/6347
hsa05132	Salmonella infection	24	0.486211	1.787	0.00452028	0.0188167	0.0132438	118	tags=38%, list=13%, signal=33%	7124/3576/2353/3569/3553/4790/8767/330/3725
hsa05140	Leishmaniasis	12	0.626904	1.87582	0.00456501	0.0188167	0.0132438	118	tags=50%, list=13%, signal=44%	7124/3552/2353/3553/4790/3725
hsa05161	Hepatitis B	19	0.54052	1.85352	0.00647839	0.0260678	0.0183473	145	tags=47%, list=16%, signal=41%	7124/3576/2353/3569/4790/3725/148022/355/64135
hsa05130	Pathogenic Escherichia coli infection	23	0.497767	1.7872	0.00728835	0.0286449	0.0201612	136	tags=39%, list=15%, signal=34%	7124/3576/2353/3569/3553/4790/23562/3725/355
hsa04932	Non-alcoholic fatty liver disease	25	0.490446	1.82015	0.00779766	0.0299501	0.0210798	153	tags=40%, list=17%, signal=34%	7124/3552/3576/2353/3569/3553/4790/3725/355/2081
hsa04659	Th17 cell differentiation	13	0.582664	1.79049	0.0109128	0.0409837	0.0288456	140	tags=54%, list=16%, signal=46%	51561/2353/3569/3553/4790/3725/4794
hsa05200	Pathways in cancer	47	0.395695	1.69256	0.011959	0.0438456	0.0308599	182	tags=38%, list=20%, signal=32%	3908/3576/51561/2353/27113/3569/4824/4790/5366/3918/3575/330/3725/7482/355/1647/7185/2113
hsa05410	Hypertrophic cardiomyopathy	6	0.72991	1.74946	0.0122683	0.0438456	0.0308599	138	tags=67%, list=15%, signal=57%	7124/3908/3569/7273
hsa04210	Apoptosis	25	0.468217	1.73765	0.0124532	0.0438456	0.0308599	180	tags=48%, list=20%, signal=39%	7124/2353/27113/4790/5366/330/3725/355/2081/1647/7185/1520
