# Supplementary material for: Development of a bioinformatics platform for analysis of quantitative transcriptomics and proteomics data: the OMnalysis
Source: PeerJ. 2021 Nov 9;9:e12415. doi: 10.7717/peerj.12415 (PMC8588854; doi:10.7717/peerj.12415)
Supplement: Supplemental Information 15 [file peerj-09-12415-s015.xlsx]

## Sheet: NTA_biocarta
Name	pSize	NDE	pNDE	tA	pPERT	pG	pGFdr	pGFWER	Status
nfkb activation by nontypeable hemophilus influenzae	19	4	0.00118443	-19.6181	5e-06	1.18114e-07	5.07892e-06	5.07892e-06	Inhibited
visceral fat deposits and the metabolic syndrome	4	1	0.0981697	6.69903	0.004	0.00347227	0.0746538	0.149308	Activated
nf-kb signaling pathway	19	4	0.00118443	3.51818	0.612	0.00596532	0.085503	0.256509	Activated
fibrinolysis pathway	6	2	0.00907977	5.05479	0.705	0.0387356	0.300133	1	Activated
pertussis toxin-insensitive ccr5 signaling in macrophage	7	1	0.16544	6.03031	0.039	0.0389927	0.300133	1	Activated
ucalpain and friends in cell spread	21	2	0.0990663	15.037	0.088	0.0500612	0.300133	1	Activated
alternative complement pathway	2	1	0.0503479	3.11622	0.226	0.0623096	0.300133	1	Activated
mets affect on macrophage differentiation	13	2	0.0419855	4.31643	0.277	0.0634319	0.300133	1	Activated
mcalpain and friends in cell motility	35	2	0.224132	66.9637	0.057	0.0684798	0.300133	1	Activated
hiv-1 nef: negative effector of fas and tnf	25	3	0.0249181	-5.00962	0.527	0.0700284	0.300133	1	Inhibited
erythropoietin mediated neuroprotection through nf-kb	11	1	0.24742	3.60295	0.06	0.0773447	0.300133	1	Activated
platelet amyloid precursor protein pathway	8	2	0.0163869	0	1	0.0837579	0.300133	1	Inhibited
stress induction of hsp regulation	10	2	0.0254665	2.57784	0.743	0.0939923	0.301783	1	Activated
tnfr2 signaling pathway	9	2	0.0207178	0	1	0.101036	0.301783	1	Inhibited
cadmium induces dna synthesis and proliferation in macrophages	12	2	0.036123	2.25913	0.604	0.105273	0.301783	1	Activated
growth hormone signaling pathway	11	1	0.24742	-4.8731	0.111	0.126192	0.339142	1	Inhibited
il-2 receptor beta chain in t cell activation	30	2	0.177418	-7.75807	0.22	0.165627	0.406333	1	Inhibited
keratinocyte differentiation	32	3	0.0472152	-1.15225	0.856	0.170093	0.406333	1	Inhibited
insulin signaling pathway	9	1	0.207486	-4.5347	0.236	0.19668	0.445118	1	Inhibited
tnfr1 signaling pathway	17	2	0.0685116	0	1	0.252174	0.542175	1	Inhibited
b cell survival pathway	20	2	0.0911099	-1.51282	0.903	0.287765	0.589234	1	Inhibited
acetylation and deacetylation of rela in nucleus	5	1	0.121173	0.517657	0.843	0.335183	0.655131	1	Activated
il 2 signaling pathway	6	1	0.143592	-1.63523	0.853	0.379672	0.709822	1	Inhibited
melanocyte development and pigmentation pathway	11	1	0.24742	-5.86983	0.562	0.413385	0.719782	1	Inhibited
sumoylation by ranbp2 regulates transcriptional repression	14	1	0.303593	59.7952	0.494	0.434521	0.719782	1	Activated
bone remodeling	10	1	0.22771	0.520156	0.707	0.455026	0.719782	1	Activated
il 6 signaling pathway	9	1	0.207486	-1.5946	0.835	0.476962	0.719782	1	Inhibited
the igf-1 receptor and longevity	11	1	0.24742	-1.75065	0.766	0.504748	0.719782	1	Inhibited
erk and pi-3 kinase are necessary for collagen binding in corneal epithelia	32	2	0.195943	0	1	0.515317	0.719782	1	Inhibited
il 4 signaling pathway	9	1	0.207486	0	1	0.533797	0.719782	1	Inhibited
gata3 participate in activating the th2 cytokine genes expression	9	1	0.207486	0	1	0.533797	0.719782	1	Inhibited
integrin signaling pathway	35	2	0.224132	-1.66172	0.931	0.535652	0.719782	1	Inhibited
fc epsilon receptor i signaling in mast cells	21	1	0.418946	-4.26029	0.533	0.558078	0.727192	1	Inhibited
phosphoinositides and their downstream targets	15	1	0.321373	-1.63275	0.874	0.63755	0.755418	1	Inhibited
mtor signaling pathway	21	1	0.418946	-3.90345	0.705	0.655566	0.755418	1	Inhibited
igf-1 signaling pathway	19	1	0.388084	-1.77429	0.763	0.65648	0.755418	1	Inhibited
bcr signaling pathway	20	1	0.403714	-2.11565	0.801	0.688447	0.755418	1	Inhibited
ras signaling pathway	17	1	0.355588	-0.313848	0.928	0.695843	0.755418	1	Inhibited
role of erbb2 in signal transduction and oncology	19	1	0.388084	-1.80024	0.852	0.696576	0.755418	1	Inhibited
regulation of bad phosphorylation	16	1	0.338701	0	1	0.705392	0.755418	1	Inhibited
fas signaling pathway (cd95)	17	1	0.355588	0	1	0.72326	0.755418	1	Inhibited
tnf/stress related signaling	18	1	0.372045	0	1	0.739901	0.755418	1	Inhibited
regulation of eif-4e and p70s6 kinase	19	1	0.388084	0	1	0.755418	0.755418	1	Inhibited

## Sheet: NTA_panther
Name	pSize	NDE	pNDE	tA	pPERT	pG	pGFdr	pGFWER	Status
Plasminogen activating cascade	4	3	6.43617e-05	0	NA	6.43617e-05	0.000579255	0.000579255	Inhibited
Gastrin_CCK2R_240212	44	2	0.309617	6.82934	0.045	0.0734746	0.260496	0.661271	Activated
Integrin signalling pathway	81	6	0.0171387	0	1	0.086832	0.260496	0.781488	Inhibited
Notch signaling pathway	9	1	0.207486	1.66172	0.327	0.250392	0.563381	1	Activated
Toll receptor signaling pathway	12	1	0.266629	0	1	0.619085	0.919169	1	Inhibited
B cell activation	22	1	0.433791	0	1	0.79609	0.919169	1	Inhibited
PI3 kinase pathway	22	1	0.433791	0	1	0.79609	0.919169	1	Inhibited
Alzheimer disease-presenilin pathway	35	1	0.595641	0	1	0.904253	0.919169	1	Inhibited
Huntington disease	38	1	0.625888	0	1	0.919169	0.919169	1	Inhibited

## Sheet: NTA_nci
Name	pSize	NDE	pNDE	tA	pPERT	pG	pGFdr	pGFWER	Status
IL23-mediated signaling events	23	9	2.38894e-09	1615.63	5e-06	3.94874e-13	3.00104e-11	3.00104e-11	Activated
Validated transcriptional targets of AP1 family members Fra1 and Fra2	29	7	6.26096e-06	23.3383	5e-06	7.88481e-10	2.99623e-08	5.99246e-08	Activated
amb2 Integrin signaling	14	7	1.91232e-08	17.3811	0.199	7.75823e-08	1.96542e-06	5.89625e-06	Activated
AP-1 transcription factor network	52	9	5.62308e-06	6.14828	0.203	1.67606e-05	0.000318452	0.00127381	Activated
Calcineurin-regulated NFAT-dependent transcription in lymphocytes	25	5	0.000363155	12.4234	0.014	6.70571e-05	0.00101927	0.00509634	Activated
Canonical NF-kappaB pathway	22	6	1.37628e-05	4.9682	0.584	0.000102329	0.00129616	0.00777697	Activated
CD40/CD40L signaling	29	6	7.54003e-05	-629.727	0.352	0.000306198	0.00332443	0.023271	Inhibited
ATF-2 transcription factor network	43	7	9.5252e-05	15.3075	0.447	0.000471087	0.00447532	0.0358026	Activated
IL12-mediated signaling events	28	5	0.00063105	954.083	0.109	0.000728052	0.00599845	0.0553319	Activated
TNF receptor signaling pathway	33	6	0.000161378	47.1369	0.466	0.00078927	0.00599845	0.0599845	Activated
Alternative NF-kappaB pathway	6	3	0.000309769	4.18665	0.277	0.000889243	0.00614386	0.0675825	Activated
HIV-1 Nef: Negative effector of Fas and TNF-alpha	29	5	0.000746811	-67.0947	0.216	0.00156991	0.00994275	0.119313	Inhibited
Signaling events mediated by HDAC Class I	46	3	0.111998	44.8887	0.006	0.00558105	0.0326277	0.42416	Activated
Glucocorticoid receptor regulatory network	51	6	0.00178836	-0.562525	0.939	0.0124088	0.0673619	0.943067	Inhibited
Validated transcriptional targets of deltaNp63 isoforms	38	3	0.0719493	18.4643	0.039	0.0192942	0.0884846	1	Activated
Validated nuclear estrogen receptor alpha network	49	2	0.356478	-3.59128	0.008	0.0195629	0.0884846	1	Inhibited
Osteopontin-mediated events	26	4	0.00397124	2.75879	0.728	0.0197926	0.0884846	1	Activated
IL1-mediated signaling events	27	4	0.00456984	-3.46909	0.956	0.0281055	0.114145	1	Inhibited
Endogenous TLR signaling	17	3	0.0085542	17.3793	0.52	0.0285363	0.114145	1	Activated
Alpha9 beta1 integrin signaling events	14	3	0.00484487	0	1	0.0306673	0.116536	1	Inhibited
BCR signaling pathway	51	5	0.00937601	15.4089	0.611	0.035302	0.12776	1	Activated
Angiopoietin receptor Tie2-mediated signaling	41	4	0.0199841	-23.573	0.412	0.0477504	0.164956	1	Inhibited
Validated nuclear estrogen receptor beta network	11	1	0.24742	-1.03874	0.038	0.0532794	0.176054	1	Inhibited
IL4-mediated signaling events	35	4	0.0116311	0.198246	0.962	0.0614596	0.194622	1	Activated
a6b1 and a6b4 Integrin signaling	27	3	0.0305354	-15.1336	0.651	0.0977649	0.292423	1	Inhibited
Downstream signaling in naïve CD8+ T cells	26	3	0.0276503	3.40105	0.74	0.100039	0.292423	1	Activated
HIF-2-alpha transcription factor network	24	3	0.0223393	0.199403	0.962	0.104017	0.292788	1	Activated
Atypical NF-kappaB pathway	12	2	0.036123	1.62221	0.629	0.108709	0.295068	1	Activated
IL2 signaling events mediated by STAT5	19	2	0.0833546	3.56237	0.301	0.117553	0.308069	1	Activated
Signaling events mediated by TCPTP	34	3	0.0549088	16.5575	0.504	0.126948	0.321602	1	Activated
Integrins in angiogenesis	45	3	0.106598	-15.9172	0.451	0.193984	0.448732	1	Inhibited
Calcium signaling in the CD4+ TCR pathway	14	2	0.0481756	0	1	0.194287	0.448732	1	Inhibited
Insulin Pathway	40	1	0.64479	-83.8825	0.075	0.194844	0.448732	1	Inhibited
Direct p53 effectors	101	2	0.733231	5.6047	0.073	0.210228	0.464263	1	Activated
IL6-mediated signaling events	38	3	0.0719493	1.26817	0.813	0.224551	0.464263	1	Activated
Plexin-D1 Signaling	18	2	0.0758163	-12.1364	0.787	0.227868	0.464263	1	Inhibited
mTOR signaling pathway	39	1	0.635461	-41.4277	0.096	0.231622	0.464263	1	Inhibited
Urokinase-type plasminogen activator (uPA) and uPAR-mediated signaling	22	2	0.107209	10.3036	0.58	0.234902	0.464263	1	Activated
EPO signaling pathway	25	2	0.132609	3.22922	0.478	0.23824	0.464263	1	Activated
Coregulation of Androgen receptor activity	54	1	0.752968	2.45431	0.104	0.277769	0.52776	1	Activated
FOXA2 and FOXA3 transcription factor networks	14	1	0.303593	4.71619	0.297	0.307118	0.541483	1	Activated
BMP receptor signaling	20	2	0.0911099	0	1	0.309381	0.541483	1	Inhibited
Validated targets of C-MYC transcriptional repression	49	2	0.356478	1.01628	0.264	0.316519	0.541483	1	Activated
Caspase Cascade in Apoptosis	45	3	0.106598	-1.68492	0.891	0.318568	0.541483	1	Inhibited
Regulation of nuclear beta catenin signaling and target gene transcription	44	1	0.679786	11.3822	0.141	0.320615	0.541483	1	Activated
Syndecan-4-mediated signaling events	21	2	0.0990663	0	1	0.328104	0.542085	1	Inhibited
Syndecan-2-mediated signaling events	26	2	0.141356	-43.5348	0.746	0.342664	0.554096	1	Inhibited
Signaling events mediated by PTP1B	34	2	0.214694	2.9301	0.55	0.370349	0.586386	1	Activated
FoxO family signaling	28	2	0.159194	1.3598	0.879	0.415121	0.643862	1	Activated
Arf6 downstream pathway	11	1	0.24742	2.73698	0.614	0.438191	0.66605	1	Activated
IL12 signaling mediated by STAT4	13	1	0.285349	2.1186	0.58	0.463203	0.690264	1	Activated
Notch-mediated HES/HEY network	30	1	0.539719	-0.901599	0.336	0.490966	0.695714	1	Inhibited
Circadian rhythm pathway	8	1	0.186734	0	1	0.500086	0.695714	1	Inhibited
RXR and RAR heterodimerization with other nuclear receptor	8	1	0.186734	0	1	0.500086	0.695714	1	Inhibited
IFN-gamma pathway	32	2	0.195943	0.407921	0.964	0.503691	0.695714	1	Activated
S1P1 pathway	14	1	0.303593	-4.03303	0.64	0.512631	0.695714	1	Inhibited
Notch signaling pathway	37	2	0.243093	-1.13368	0.878	0.54307	0.717004	1	Inhibited
Validated transcriptional targets of TAp63 isoforms	44	2	0.309617	2.51682	0.698	0.547187	0.717004	1	Activated
Signaling events mediated by the Hedgehog family	10	1	0.22771	0	1	0.564649	0.723274	1	Inhibited
FOXA1 transcription factor network	20	1	0.403714	2.18161	0.578	0.57292	0.723274	1	Activated
Alpha-synuclein signaling	18	1	0.372045	1.5834	0.647	0.583525	0.723274	1	Activated
HIF-1-alpha transcription factor network	53	2	0.393138	2.09018	0.624	0.590039	0.723274	1	Activated
Thromboxane A2 receptor signaling	23	1	0.448258	-0.974401	0.648	0.649566	0.783604	1	Inhibited
PDGFR-beta signaling pathway	86	2	0.648604	-34.7588	0.496	0.68656	0.808483	1	Inhibited
p73 transcription factor network	63	2	0.480204	3.12429	0.679	0.691465	0.808483	1	Activated
Syndecan-1-mediated signaling events	20	1	0.403714	0	1	0.769902	0.886554	1	Inhibited
Regulation of Ras family activation	22	1	0.433791	0	1	0.79609	0.888507	1	Inhibited
Posttranslational regulation of adherens junction stability and dissassembly	33	1	0.574134	-18.6924	0.798	0.81577	0.888507	1	Inhibited
TRAIL signaling pathway	24	1	0.462356	0	1	0.819027	0.888507	1	Inhibited
Validated targets of C-MYC transcriptional activation	67	2	0.512847	0.521402	0.925	0.82815	0.888507	1	Activated
Signaling events mediated by focal adhesion kinase	50	1	0.725943	37.5117	0.657	0.830053	0.888507	1	Activated
CXCR4-mediated signaling events	44	1	0.679786	7.08639	0.812	0.879994	0.928883	1	Activated
Signaling events regulated by Ret tyrosine kinase	34	1	0.585026	0	1	0.898658	0.935589	1	Inhibited
Signaling events mediated by Hepatocyte Growth Factor Receptor (c-Met)	64	1	0.809472	2.9243	0.778	0.920976	0.940114	1	Activated
Integrin-linked kinase signaling	40	1	0.64479	0	1	0.927744	0.940114	1	Inhibited
TGF-beta receptor signaling	44	1	0.679786	0	1	0.942168	0.942168	1	Inhibited

## Sheet: NTA_PharmGKB
Name	pSize	NDE	pNDE	tA	pPERT	pG	pGFdr	pGFWER	Status
Tacrolimus/Cyclosporine Pathway, Pharmacodynamics	31	7	1.00973e-05	-2.59302	0.829	0.00010623	0.000956071	0.000956071	Inhibited
Anti-diabetic Drug Potassium Channel Inhibitors Pathway, Pharmacodynamics	11	2	0.0306093	-1.43039	0.57	0.0880839	0.396377	0.792755	Inhibited
Vemurafenib Pathway, Pharmacodynamics	22	2	0.107209	4.04506	0.665	0.259577	0.736558	1	Activated
EGFR Inhibitor Pathway, Pharmacodynamics	44	2	0.309617	3.44351	0.52	0.455044	0.736558	1	Activated
Metformin Pathway, Pharmacodynamic	28	1	0.51525	1.69517	0.466	0.58266	0.736558	1	Activated
Sorafenib Pharmacodynamics	20	1	0.403714	-2.14435	0.6	0.585678	0.736558	1	Inhibited
VEGF Signaling Pathway	46	1	0.695974	-3.9475	0.42	0.651833	0.736558	1	Inhibited
Peginterferon alpha-2a/Peginterferon alpha-2b Pathway (Hepatocyte), Pharmacodynamics	15	1	0.321373	0	1	0.686181	0.736558	1	Inhibited
Platelet Aggregation Inhibitor Pathway, Pharmacodynamics	19	1	0.388084	0.0924944	0.95	0.736558	0.736558	1	Activated
