# Supplementary material for: Development of a bioinformatics platform for analysis of quantitative transcriptomics and proteomics data: the OMnalysis
Source: PeerJ. 2021 Nov 9;9:e12415. doi: 10.7717/peerj.12415 (PMC8588854; doi:10.7717/peerj.12415)
Supplement: Supplemental Information 16 [file peerj-09-12415-s016.xlsx]

## Sheet: Reactome_treatment1
ID	Description	GeneRatio	BgRatio	pvalue	p.adjust	qvalue	geneID	Count
R-HSA-6783783	Interleukin-10 signaling	15/196	47/10704	2.28991e-15	1.40371e-12	1.18834e-12	2920/3383/1440/6347/3552/6364/3553/3569/3557/2919/3627/3576/1435/7124/6352	15
R-HSA-449147	Signaling by Interleukins	36/196	461/10704	8.86552e-14	2.71728e-11	2.30037e-11	5898/9235/4791/2920/3383/4792/8767/3718/1440/6347/4790/51561/6648/3552/6364/1846/3553/3656/3569/3557/10068/7412/11009/2919/3575/3965/3667/3627/3576/3726/6288/1435/4128/7124/4067/6352	36
R-HSA-380108	Chemokine receptors bind chemokines	12/196	59/10704	5.34901e-10	1.09298e-07	9.25284e-08	6376/2920/6347/6364/6372/2921/6374/2919/3627/6373/3576/6352	12
R-HSA-913531	Interferon Signaling	19/196	199/10704	3.7135e-09	5.69094e-07	4.81778e-07	960/3430/3383/23586/2635/2633/3437/3433/4502/3659/10346/8638/115362/2634/115361/7412/3669/4600/3134	19
R-HSA-877300	Interferon gamma signaling	13/196	91/10704	9.58764e-09	1.17544e-06	9.95096e-07	960/3383/2635/2633/4502/3659/10346/8638/115362/2634/115361/7412/3134	13
R-HSA-6785807	Interleukin-4 and Interleukin-13 signaling	13/196	108/10704	7.84319e-08	8.01313e-06	6.78367e-06	3383/3718/6347/51561/3552/3553/3569/7412/3576/3726/6288/4128/7124	13
R-HSA-168928	DDX58/IFIH1-mediated induction of interferon-alpha/beta	10/196	78/10704	1.43736e-06	0.000125872	0.000106559	4791/1540/4792/23586/79132/4790/64135/7128/6288/9641	10
R-HSA-933542	TRAF6 mediated NF-kB activation	6/196	24/10704	3.57012e-06	0.000218848	0.00018527	4791/4792/23586/4790/64135/6288	6
R-HSA-9660826	Purinergic signaling in leishmaniasis infection	6/196	24/10704	3.57012e-06	0.000218848	0.00018527	4791/5027/4790/3552/3553/718	6
R-HSA-9664424	Cell recruitment (pro-inflammatory response)	6/196	24/10704	3.57012e-06	0.000218848	0.00018527	4791/5027/4790/3552/3553/718	6
R-HSA-375276	Peptide ligand-binding receptors	15/196	201/10704	4.07954e-06	0.000227341	0.00019246	6376/2920/6347/6364/6372/718/2921/6374/2919/3627/6373/3576/8862/6288/6352	15
R-HSA-909733	Interferon alpha/beta signaling	9/196	70/10704	4.77452e-06	0.000243898	0.000206477	3430/3437/3433/3659/8638/2634/3669/4600/3134	9
R-HSA-448706	Interleukin-1 processing	4/196	8/10704	7.20624e-06	0.000320948	0.000271705	4791/4790/3552/3553	4
R-HSA-168643	Nucleotide-binding domain, leucine rich repeat containing receptor (NLR) signaling pathways	8/196	56/10704	7.32998e-06	0.000320948	0.000271705	330/4791/1540/5027/8767/4790/7128/3656	8
R-HSA-445989	TAK1 activates NFkB by phosphorylation and activation of IKKs complex	6/196	33/10704	2.56092e-05	0.00104656	0.000885988	4791/4792/8767/4790/3656/6288	6
R-HSA-168164	Toll Like Receptor 3 (TLR3) Cascade	9/196	94/10704	5.35072e-05	0.00195515	0.00165517	330/4791/4792/8767/4790/1846/3656/6288/9641	9
R-HSA-73887	Death Receptor Signalling	11/196	141/10704	5.42212e-05	0.00195515	0.00165517	330/7185/1540/4792/8767/4790/5924/7128/8743/10018/7124	11
R-HSA-75205	Dissolution of Fibrin Clot	4/196	13/10704	6.8489e-05	0.00233243	0.00197456	5329/5327/5328/5270	4
R-HSA-166166	MyD88-independent TLR4 cascade	9/196	99/10704	8.04931e-05	0.00246711	0.00208858	330/4791/4792/8767/4790/1846/3656/6288/9641	9
R-HSA-937061	TRIF(TICAM1)-mediated TLR4 signaling	9/196	99/10704	8.04931e-05	0.00246711	0.00208858	330/4791/4792/8767/4790/1846/3656/6288/9641	9
R-HSA-9020702	Interleukin-1 signaling	9/196	103/10704	0.000109591	0.00319901	0.00270818	4791/4792/8767/4790/3552/3553/3656/3557/6288	9
R-HSA-166016	Toll Like Receptor 4 (TLR4) Cascade	10/196	129/10704	0.000125237	0.00340134	0.00287947	330/4791/4792/8767/4790/1846/3656/7097/6288/9641	10
R-HSA-168898	Toll-like Receptor Cascades	11/196	155/10704	0.00012762	0.00340134	0.00287947	330/4791/4792/8767/4790/1846/3656/7097/1520/6288/9641	11
R-HSA-5357956	TNFR1-induced NFkappaB signaling pathway	5/196	30/10704	0.00019206	0.00490554	0.00415288	330/7185/1540/7128/7124	5
R-HSA-5603029	IkBA variant leads to EDA-ID	3/196	7/10704	0.000200454	0.00491514	0.00416101	4791/4792/4790	3
R-HSA-446652	Interleukin-1 family signaling	10/196	140/10704	0.000245564	0.00578964	0.00490133	4791/4792/8767/4790/3552/3553/3656/3557/10068/6288	10
R-HSA-5676594	TNF receptor superfamily (TNFSF) members mediating non-canonical NF-kB pathway	4/196	18/10704	0.000272789	0.00619331	0.00524307	330/10673/4049/4050	4
R-HSA-166058	MyD88:MAL(TIRAP) cascade initiated on plasma membrane	8/196	95/10704	0.000341309	0.00721456	0.00610763	4791/4792/8767/4790/1846/3656/7097/6288	8
R-HSA-168188	Toll Like Receptor TLR6:TLR2 Cascade	8/196	95/10704	0.000341309	0.00721456	0.00610763	4791/4792/8767/4790/1846/3656/7097/6288	8
R-HSA-936440	Negative regulators of DDX58/IFIH1 signaling	5/196	34/10704	0.000353402	0.00722118	0.00611323	1540/23586/64135/7128/9641	5
R-HSA-5357905	Regulation of TNFR1 signaling	5/196	35/10704	0.000406235	0.00783411	0.00663212	330/7185/1540/7128/7124	5
R-HSA-168179	Toll Like Receptor TLR1:TLR2 Cascade	8/196	98/10704	0.000421738	0.00783411	0.00663212	4791/4792/8767/4790/1846/3656/7097/6288	8
R-HSA-181438	Toll Like Receptor 2 (TLR2) Cascade	8/196	98/10704	0.000421738	0.00783411	0.00663212	4791/4792/8767/4790/1846/3656/7097/6288	8
R-HSA-168638	NOD1/2 Signaling Pathway	5/196	37/10704	0.000529542	0.00954733	0.00808248	330/1540/8767/7128/3656	5
R-HSA-5689896	Ovarian tumor domain proteases	5/196	38/10704	0.000600813	0.0105228	0.00890829	8767/23586/64135/7128/10318	5
R-HSA-9031628	NGF-stimulated transcription	5/196	39/10704	0.000679042	0.0115626	0.00978853	3397/6236/3726/10221/8061	5
R-HSA-198725	Nuclear Events (kinase and transcription factor activation)	6/196	61/10704	0.000839418	0.0127694	0.0108102	1846/3397/6236/3726/10221/8061	6
R-HSA-5260271	Diseases of Immune System	4/196	24/10704	0.000869239	0.0127694	0.0108102	4791/4792/4790/7097	4
R-HSA-5602358	Diseases associated with the TLR signaling cascade	4/196	24/10704	0.000869239	0.0127694	0.0108102	4791/4792/4790/7097	4
R-HSA-4755510	SUMOylation of immune response proteins	3/196	11/10704	0.000895124	0.0127694	0.0108102	4791/4792/9641	3
R-HSA-168142	Toll Like Receptor 10 (TLR10) Cascade	7/196	85/10704	0.000916565	0.0127694	0.0108102	4791/4792/8767/4790/1846/3656/6288	7
R-HSA-168176	Toll Like Receptor 5 (TLR5) Cascade	7/196	85/10704	0.000916565	0.0127694	0.0108102	4791/4792/8767/4790/1846/3656/6288	7
R-HSA-216083	Integrin cell surface interactions	7/196	85/10704	0.000916565	0.0127694	0.0108102	960/3383/3791/7057/7412/3673/961	7
R-HSA-975871	MyD88 cascade initiated on plasma membrane	7/196	85/10704	0.000916565	0.0127694	0.0108102	4791/4792/8767/4790/1846/3656/6288	7
R-HSA-351200	Interconversion of polyamines	2/196	3/10704	0.000988735	0.0134688	0.0114023	54498/6303	2
R-HSA-75893	TNF signaling	5/196	44/10704	0.00118957	0.0158523	0.0134201	330/7185/1540/7128/7124	5
R-HSA-187037	Signaling by NTRK1 (TRKA)	8/196	115/10704	0.00121755	0.01588	0.0134435	5898/1846/3397/6236/3667/3726/10221/8061	8
R-HSA-373076	Class A/1 (Rhodopsin-like receptors)	15/196	335/10704	0.00126029	0.0159836	0.0135313	6376/2920/6347/6364/6372/718/2921/6374/2919/3627/6373/3576/8862/6288/6352	15
R-HSA-6798695	Neutrophil degranulation	19/196	480/10704	0.00127765	0.0159836	0.0135313	5329/960/634/2683/1832/4790/5328/7130/718/22918/5787/7097/101/1520/5806/2919/116844/25840/961	19
R-HSA-975138	TRAF6 mediated induction of NFkB and MAP kinases upon TLR7/8 or 9 activation	7/196	91/10704	0.00137095	0.0168079	0.014229	4791/4792/8767/4790/1846/3656/6288	7
R-HSA-975155	MyD88 dependent cascade initiated on endosome	7/196	92/10704	0.0014613	0.0175642	0.0148694	4791/4792/8767/4790/1846/3656/6288	7
R-HSA-5357786	TNFR1-induced proapoptotic signaling	3/196	13/10704	0.00151016	0.0178024	0.015071	1540/7128/7124	3
R-HSA-168181	Toll Like Receptor 7/8 (TLR7/8) Cascade	7/196	93/10704	0.00155623	0.0179994	0.0152378	4791/4792/8767/4790/1846/3656/6288	7
R-HSA-168138	Toll Like Receptor 9 (TLR9) Cascade	7/196	96/10704	0.0018701	0.0210098	0.0177863	4791/4792/8767/4790/1846/3656/6288	7
R-HSA-918233	TRAF3-dependent IRF activation pathway	3/196	14/10704	0.00189624	0.0210098	0.0177863	23586/64135/9641	3
R-HSA-140179	Amine Oxidase reactions	2/196	4/10704	0.00195361	0.0210098	0.0177863	54498/4128	2
R-HSA-2473224	Antagonism of Activin by Follistatin	2/196	4/10704	0.00195361	0.0210098	0.0177863	3624/10468	2
R-HSA-844456	The NLRP3 inflammasome	3/196	15/10704	0.00233854	0.024716	0.0209238	4791/5027/4790	3
R-HSA-5668541	TNFR2 non-canonical NF-kB pathway	7/196	102/10704	0.00264351	0.0274656	0.0232515	330/4791/10673/5971/4049/4050/7124	7
R-HSA-193639	p75NTR signals via NF-kB	3/196	16/10704	0.00283967	0.029012	0.0245607	4792/8767/4790	3
R-HSA-166520	Signaling by NTRKs	8/196	134/10704	0.003197	0.0321272	0.0271979	5898/1846/3397/6236/3667/3726/10221/8061	8
R-HSA-1810476	RIP-mediated NFkB activation via ZBP1	3/196	17/10704	0.00340205	0.0336364	0.0284756	4791/4792/4790	3
R-HSA-1474244	Extracellular matrix organization	13/196	301/10704	0.0035946	0.0349761	0.0296097	960/3918/59277/634/3383/3791/7057/101/7412/1520/3673/961/3914	13
R-HSA-3000171	Non-integrin membrane-ECM interactions	5/196	59/10704	0.00439731	0.042118	0.0356559	3918/59277/7057/3673/3914	5
R-HSA-173623	Classical antibody-mediated complement activation	2/196	6/10704	0.00476711	0.0442764	0.037483	715/716	2
R-HSA-5660668	CLEC7A/inflammasome pathway	2/196	6/10704	0.00476711	0.0442764	0.037483	4790/3553	2
R-HSA-622312	Inflammasomes	3/196	20/10704	0.00547802	0.0501198	0.0424299	4791/5027/4790	3
R-HSA-1606322	ZBP1(DAI) mediated induction of type I IFNs	3/196	21/10704	0.00630584	0.0560215	0.0474261	4791/4792/4790	3
R-HSA-5621575	CD209 (DC-SIGN) signaling	3/196	21/10704	0.00630584	0.0560215	0.0474261	5971/4790/4067	3
R-HSA-3134963	DEx/H-box helicases activate type I IFN and inflammatory cytokines production	2/196	7/10704	0.00659377	0.0577426	0.0488832	4791/4790	2
R-HSA-418594	G alpha (i) signalling events	15/196	405/10704	0.0075062	0.0648071	0.0548637	6376/2920/6364/6372/718/3949/2921/6374/2919/3627/6373/3576/8862/6288/6352	15
R-HSA-166663	Initial triggering of complement	3/196	23/10704	0.0081747	0.0695985	0.05892	718/715/716	3
R-HSA-449836	Other interleukin signaling	3/196	24/10704	0.00921833	0.0774087	0.0655319	9235/1440/1435	3
R-HSA-111453	BH3-only proteins associate with and inactivate anti-apoptotic BCL-2 members	2/196	9/10704	0.0110342	0.0889998	0.0753446	90427/10018	2
R-HSA-8983711	OAS antiviral response	2/196	9/10704	0.0110342	0.0889998	0.0753446	23586/8638	2
R-HSA-9662834	CD163 mediating an anti-inflammatory response	2/196	9/10704	0.0110342	0.0889998	0.0753446	79651/3569	2
R-HSA-5621481	C-type lectin receptors (CLRs)	7/196	142/10704	0.0154963	0.122349	0.103577	4791/4792/5971/4790/3553/26253/4067	7
R-HSA-933541	TRAF6 mediated IRF7 activation	3/196	29/10704	0.0155681	0.122349	0.103577	23586/64135/9641	3
R-HSA-1236977	Endosomal/Vacuolar pathway	2/196	11/10704	0.0164573	0.126104	0.106756	1520/3134	2
R-HSA-446107	Type I hemidesmosome assembly	2/196	11/10704	0.0164573	0.126104	0.106756	3918/3914	2
R-HSA-3000157	Laminin interactions	3/196	30/10704	0.0170692	0.127552	0.107982	3918/3673/3914	3
R-HSA-8874081	MET activates PTK2 signaling	3/196	30/10704	0.0170692	0.127552	0.107982	3918/3673/3914	3
R-HSA-9658195	Leishmania infection	10/196	252/10704	0.0175736	0.127552	0.107982	4791/5027/4790/3552/3553/718/79651/3569/11245/4067	10
R-HSA-3560792	Defective SLC26A2 causes chondrodysplasias	1/196	1/10704	0.0183109	0.127552	0.107982	1836	1
R-HSA-4793953	Defective B4GALT1 causes B4GALT1-CDG (CDG-2d)	1/196	1/10704	0.0183109	0.127552	0.107982	2683	1
R-HSA-5579012	Defective MAOA causes Brunner syndrome (BRUNS)	1/196	1/10704	0.0183109	0.127552	0.107982	4128	1
R-HSA-5683678	Defective ABCA3 causes SMDP3	1/196	1/10704	0.0183109	0.127552	0.107982	21	1
R-HSA-5688399	Defective ABCA3 causes SMDP3	1/196	1/10704	0.0183109	0.127552	0.107982	21	1
R-HSA-2122948	Activated NOTCH1 Transmits Signal to the Nucleus	3/196	31/10704	0.0186485	0.128444	0.108737	182/92737/54492	3
R-HSA-933543	NF-kB activation through FADD/RIP-1 pathway mediated by caspase-8 and -10	2/196	12/10704	0.0195133	0.132907	0.112515	23586/64135	2
R-HSA-2559585	Oncogene Induced Senescence	3/196	33/10704	0.0220424	0.148484	0.125702	1870/3397/2113	3
R-HSA-1502540	Signaling by Activin	2/196	13/10704	0.0227866	0.150195	0.127151	3624/10468	2
R-HSA-209560	NF-kB is activated and signals survival	2/196	13/10704	0.0227866	0.150195	0.127151	4792/4790	2
R-HSA-500792	GPCR ligand binding	15/196	467/10704	0.0245743	0.160256	0.135668	6376/2920/6347/6364/6372/718/2921/6374/2919/3627/6373/3576/8862/6288/6352	15
R-HSA-446728	Cell junction organization	5/196	91/10704	0.0256318	0.165393	0.140016	3918/55679/23562/9076/3914	5
R-HSA-166786	Creation of C4 and C2 activators	2/196	14/10704	0.0262683	0.167734	0.141999	715/716	2
R-HSA-1266695	Interleukin-7 signaling	3/196	36/10704	0.0277224	0.175194	0.148314	3718/3575/3667	3
R-HSA-2559583	Cellular Senescence	8/196	197/10704	0.028461	0.176531	0.149446	1870/4790/3552/3397/2113/3569/8091/3576	8
R-HSA-450294	MAP kinase activation	4/196	64/10704	0.0295368	0.176531	0.149446	8767/4790/1846/3656	4
R-HSA-5083635	Defective B3GALTL causes Peters-plus syndrome (PpS)	3/196	37/10704	0.0297723	0.176531	0.149446	11174/55901/7057	3
R-HSA-2214320	Anchoring fibril formation	2/196	15/10704	0.0299498	0.176531	0.149446	3918/3914	2
R-HSA-2691230	Signaling by NOTCH1 HD Domain Mutants in Cancer	2/196	15/10704	0.0299498	0.176531	0.149446	182/54492	2
R-HSA-2691232	Constitutive Signaling by NOTCH1 HD Domain Mutants	2/196	15/10704	0.0299498	0.176531	0.149446	182/54492	2
R-HSA-75892	Platelet Adhesion to exposed collagen	2/196	15/10704	0.0299498	0.176531	0.149446	3673/4067	2
R-HSA-1500931	Cell-Cell communication	6/196	129/10704	0.0311378	0.181785	0.153894	3918/55679/23562/9076/961/3914	6
R-HSA-5173214	O-glycosylation of TSR domain-containing proteins	3/196	38/10704	0.0319003	0.18448	0.156175	11174/55901/7057	3
R-HSA-193704	p75 NTR receptor-mediated signalling	5/196	97/10704	0.0325754	0.186624	0.15799	4792/8767/4790/5924/10018	5
R-HSA-1433559	Regulation of KIT signaling	2/196	16/10704	0.0338227	0.191975	0.16252	4254/4067	2
R-HSA-141333	Biogenic amines are oxidatively deaminated to aldehydes by MAOA and MAOB	1/196	2/10704	0.0362882	0.195129	0.16519	4128	1
R-HSA-141334	PAOs oxidise polyamines to amines	1/196	2/10704	0.0362882	0.195129	0.16519	54498	1
R-HSA-1483152	Hydrolysis of LPE	1/196	2/10704	0.0362882	0.195129	0.16519	8605	1
R-HSA-379398	Enzymatic degradation of Dopamine by monoamine oxidase	1/196	2/10704	0.0362882	0.195129	0.16519	4128	1
R-HSA-380612	Metabolism of serotonin	1/196	2/10704	0.0362882	0.195129	0.16519	4128	1
R-HSA-8854521	Interaction between PHLDA1 and AURKA	1/196	2/10704	0.0362882	0.195129	0.16519	22822	1
R-HSA-5607764	CLEC7A (Dectin-1) signaling	5/196	101/10704	0.0377983	0.201481	0.170568	4791/4792/5971/4790/3553	5
R-HSA-8875878	MET promotes cell motility	3/196	41/10704	0.0387477	0.204761	0.173345	3918/3673/3914	3
R-HSA-202733	Cell surface interactions at the vascular wall	6/196	137/10704	0.0399897	0.209519	0.177372	6401/960/634/285/961/4067	6
R-HSA-448424	Interleukin-17 signaling	4/196	72/10704	0.0427903	0.222292	0.188186	8767/4790/1846/3656	4
R-HSA-5576886	Phase 4 - resting membrane potential	2/196	19/10704	0.0465091	0.237791	0.201307	3759/60598	2
R-HSA-1980143	Signaling by NOTCH1	4/196	74/10704	0.0465497	0.237791	0.201307	9734/182/92737/54492	4
R-HSA-111446	Activation of BIM and translocation to mitochondria	1/196	3/10704	0.053938	0.262412	0.22215	10018	1
R-HSA-139910	Activation of BMF and translocation to mitochondria	1/196	3/10704	0.053938	0.262412	0.22215	90427	1
R-HSA-350864	Regulation of thyroid hormone activity	1/196	3/10704	0.053938	0.262412	0.22215	1734	1
R-HSA-379397	Enzymatic degradation of dopamine by COMT	1/196	3/10704	0.053938	0.262412	0.22215	4128	1
R-HSA-380615	Serotonin clearance from the synaptic cleft	1/196	3/10704	0.053938	0.262412	0.22215	4128	1
R-HSA-5653890	Lactose synthesis	1/196	3/10704	0.053938	0.262412	0.22215	2683	1
R-HSA-977606	Regulation of Complement cascade	3/196	47/10704	0.054478	0.262953	0.222608	718/715/716	3
R-HSA-2979096	NOTCH2 Activation and Transmission of Signal to the Nucleus	2/196	22/10704	0.0606374	0.285929	0.242059	182/54492	2
R-HSA-8862803	Deregulated CDK5 triggers multiple neurodegenerative pathways in Alzheimer's disease models	2/196	22/10704	0.0606374	0.285929	0.242059	6648/10018	2
R-HSA-8863678	Neurodegenerative Diseases	2/196	22/10704	0.0606374	0.285929	0.242059	6648/10018	2
R-HSA-112409	RAF-independent MAPK1/3 activation	2/196	23/10704	0.0656339	0.302508	0.256094	1846/3569	2
R-HSA-450321	JNK (c-Jun kinases) phosphorylation and activation mediated by activated human TAK1	2/196	23/10704	0.0656339	0.302508	0.256094	8767/3656	2
R-HSA-8956321	Nucleotide salvage	2/196	23/10704	0.0656339	0.302508	0.256094	1890/2766	2
R-HSA-450302	activated TAK1 mediates p38 MAPK activation	2/196	24/10704	0.0707626	0.316566	0.267995	8767/3656	2
R-HSA-982772	Growth hormone receptor signaling	2/196	24/10704	0.0707626	0.316566	0.267995	3667/4067	2
R-HSA-1296053	Classical Kir channels	1/196	4/10704	0.0712661	0.316566	0.267995	3759	1
R-HSA-194306	Neurophilin interactions with VEGF and VEGFR	1/196	4/10704	0.0712661	0.316566	0.267995	3791	1
R-HSA-379401	Dopamine clearance from the synaptic cleft	1/196	4/10704	0.0712661	0.316566	0.267995	4128	1
R-HSA-191273	Cholesterol biosynthesis	2/196	25/10704	0.076017	0.330485	0.279779	6713/3157	2
R-HSA-8854691	Interleukin-20 family signaling	2/196	25/10704	0.076017	0.330485	0.279779	3718/11009	2
R-HSA-9013507	NOTCH3 Activation and Transmission of Signal to the Nucleus	2/196	25/10704	0.076017	0.330485	0.279779	182/54492	2
R-HSA-1655829	Regulation of cholesterol biosynthesis by SREBP (SREBF)	3/196	55/10704	0.0794203	0.342099	0.289611	6713/3157/3638	3
R-HSA-447115	Interleukin-12 family signaling	3/196	57/10704	0.0863119	0.342099	0.289611	5898/51561/6648	3
R-HSA-1368108	BMAL1:CLOCK,NPAS2 activates circadian gene expression	2/196	27/10704	0.0868784	0.342099	0.289611	10135/8553	2
R-HSA-3000170	Syndecan interactions	2/196	27/10704	0.0868784	0.342099	0.289611	7057/3673	2
R-HSA-380994	ATF4 activates genes in response to endoplasmic reticulum stress	2/196	27/10704	0.0868784	0.342099	0.289611	6347/3576	2
R-HSA-5621480	Dectin-2 family	2/196	27/10704	0.0868784	0.342099	0.289611	26253/4067	2
R-HSA-173736	Alternative complement activation	1/196	5/10704	0.0882784	0.342099	0.289611	718	1
R-HSA-180689	APOBEC3G mediated resistance to HIV-1 infection	1/196	5/10704	0.0882784	0.342099	0.289611	60489	1
R-HSA-5690714	CD22 mediated BCR regulation	1/196	5/10704	0.0882784	0.342099	0.289611	4067	1
R-HSA-74713	IRS activation	1/196	5/10704	0.0882784	0.342099	0.289611	3667	1
R-HSA-8952158	RUNX3 regulates BCL2L11 (BIM) transcription	1/196	5/10704	0.0882784	0.342099	0.289611	10018	1
R-HSA-8964026	Chylomicron clearance	1/196	5/10704	0.0882784	0.342099	0.289611	3949	1
R-HSA-9673768	Signaling by membrane-tethered fusions of PDGFRA or PDGFRB	1/196	5/10704	0.0882784	0.342099	0.289611	3791	1
R-HSA-166658	Complement cascade	3/196	58/10704	0.0898499	0.342099	0.289611	718/715/716	3
R-HSA-186797	Signaling by PDGF	3/196	58/10704	0.0898499	0.342099	0.289611	5327/7057/56034	3
R-HSA-2644602	Signaling by NOTCH1 PEST Domain Mutants in Cancer	3/196	58/10704	0.0898499	0.342099	0.289611	9734/182/54492	3
R-HSA-2644603	Signaling by NOTCH1 in Cancer	3/196	58/10704	0.0898499	0.342099	0.289611	9734/182/54492	3
R-HSA-2644606	Constitutive Signaling by NOTCH1 PEST Domain Mutants	3/196	58/10704	0.0898499	0.342099	0.289611	9734/182/54492	3
R-HSA-2894858	Signaling by NOTCH1 HD+PEST Domain Mutants in Cancer	3/196	58/10704	0.0898499	0.342099	0.289611	9734/182/54492	3
R-HSA-2894862	Constitutive Signaling by NOTCH1 HD+PEST Domain Mutants	3/196	58/10704	0.0898499	0.342099	0.289611	9734/182/54492	3
R-HSA-351202	Metabolism of polyamines	3/196	59/10704	0.0934479	0.353602	0.299349	54498/4953/6303	3
R-HSA-420029	Tight junction interactions	2/196	29/10704	0.09817	0.358203	0.303244	23562/9076	2
R-HSA-5213460	RIPK1-mediated regulated necrosis	2/196	29/10704	0.09817	0.358203	0.303244	330/8743	2
R-HSA-5218859	Regulated Necrosis	2/196	29/10704	0.09817	0.358203	0.303244	330/8743	2
R-HSA-5669034	TNFs bind their physiological receptors	2/196	29/10704	0.09817	0.358203	0.303244	10673/4049	2
R-HSA-5675482	Regulation of necroptotic cell death	2/196	29/10704	0.09817	0.358203	0.303244	330/8743	2
R-HSA-9645723	Diseases of programmed cell death	2/196	29/10704	0.09817	0.358203	0.303244	6648/10018	2
R-HSA-2022090	Assembly of collagen fibrils and other multimeric structures	3/196	61/10704	0.100819	0.365643	0.309542	3918/1520/3914	3
R-HSA-114452	Activation of BH3-only proteins	2/196	30/10704	0.103963	0.365643	0.309542	90427/10018	2
R-HSA-1566977	Fibronectin matrix formation	1/196	6/10704	0.104981	0.365643	0.309542	634	1
R-HSA-174362	Transport and synthesis of PAPS	1/196	6/10704	0.104981	0.365643	0.309542	1836	1
R-HSA-3000471	Scavenging by Class B Receptors	1/196	6/10704	0.104981	0.365643	0.309542	6288	1
R-HSA-5626978	TNFR1-mediated ceramide production	1/196	6/10704	0.104981	0.365643	0.309542	7124	1
R-HSA-8964208	Phenylalanine metabolism	1/196	6/10704	0.104981	0.365643	0.309542	259307	1
R-HSA-9603381	Activated NTRK3 signals through PI3K	1/196	6/10704	0.104981	0.365643	0.309542	3667	1
R-HSA-1834949	Cytosolic sensors of pathogen-associated DNA	3/196	63/10704	0.108415	0.37547	0.317862	4791/4792/4790	3
R-HSA-1474228	Degradation of the extracellular matrix	5/196	140/10704	0.114293	0.391617	0.331531	960/3918/101/1520/3914	5
R-HSA-381042	PERK regulates gene expression	2/196	32/10704	0.115816	0.391617	0.331531	6347/3576	2
R-HSA-9006936	Signaling by TGFB family members	4/196	102/10704	0.117138	0.391617	0.331531	3624/10468/4091/3726	4
R-HSA-6811558	PI5P, PP2A and IER3 Regulate PI3K/AKT Signaling	4/196	103/10704	0.120231	0.391617	0.331531	4254/8870/2250/3667	4
R-HSA-112412	SOS-mediated signalling	1/196	7/10704	0.121378	0.391617	0.331531	3667	1
R-HSA-162791	Attachment of GPI anchor to uPAR	1/196	7/10704	0.121378	0.391617	0.331531	5329	1
R-HSA-2660825	Signaling by NOTCH1 t(7;9)(NOTCH1:M1580_K2555) Translocation Mutant	1/196	7/10704	0.121378	0.391617	0.331531	182	1
R-HSA-2660826	Constitutive Signaling by NOTCH1 t(7;9)(NOTCH1:M1580_K2555) Translocation Mutant	1/196	7/10704	0.121378	0.391617	0.331531	182	1
R-HSA-426117	Cation-coupled Chloride cotransporters	1/196	7/10704	0.121378	0.391617	0.331531	6558	1
R-HSA-9027277	Erythropoietin activates Phospholipase C gamma (PLCG)	1/196	7/10704	0.121378	0.391617	0.331531	4067	1
R-HSA-9027283	Erythropoietin activates STAT5	1/196	7/10704	0.121378	0.391617	0.331531	4067	1
R-HSA-9637628	Modulation by Mtb of host immune system	1/196	7/10704	0.121378	0.391617	0.331531	7097	1
R-HSA-1980145	Signaling by NOTCH2	2/196	33/10704	0.121866	0.391617	0.331531	182/54492	2
R-HSA-3781865	Diseases of glycosylation	5/196	143/10704	0.122021	0.391617	0.331531	11174/2683/55901/7057/1836	5
R-HSA-1169091	Activation of NF-kappaB in B cells	3/196	67/10704	0.124242	0.396667	0.335806	4792/4790/4794	3
R-HSA-3906995	Diseases associated with O-glycosylation of proteins	3/196	68/10704	0.128323	0.407575	0.345041	11174/55901/7057	3
R-HSA-8856825	Cargo recognition for clathrin-mediated endocytosis	4/196	106/10704	0.129718	0.409882	0.346993	84251/3949/1601/3575	4
R-HSA-8957275	Post-translational protein phosphorylation	4/196	108/10704	0.136211	0.413106	0.349723	8614/718/3569/1435	4
R-HSA-400253	Circadian Clock	3/196	70/10704	0.136627	0.413106	0.349723	10135/8553/5187	3
R-HSA-174577	Activation of C3 and C5	1/196	8/10704	0.137477	0.413106	0.349723	718	1
R-HSA-194313	VEGF ligand-receptor interactions	1/196	8/10704	0.137477	0.413106	0.349723	3791	1
R-HSA-195399	VEGF binds to VEGFR leading to receptor dimerization	1/196	8/10704	0.137477	0.413106	0.349723	3791	1
R-HSA-3656244	Defective B4GALT1 causes B4GALT1-CDG (CDG-2d)	1/196	8/10704	0.137477	0.413106	0.349723	2683	1
R-HSA-444473	Formyl peptide receptors bind formyl peptides and many other ligands	1/196	8/10704	0.137477	0.413106	0.349723	6288	1
R-HSA-5632681	Ligand-receptor interactions	1/196	8/10704	0.137477	0.413106	0.349723	64399	1
R-HSA-75158	TRAIL signaling	1/196	8/10704	0.137477	0.413106	0.349723	8743	1
R-HSA-9012546	Interleukin-18 signaling	1/196	8/10704	0.137477	0.413106	0.349723	10068	1
R-HSA-199418	Negative regulation of the PI3K/AKT network	4/196	110/10704	0.142833	0.427107	0.361576	4254/8870/2250/3667	4
R-HSA-5173105	O-linked glycosylation	4/196	111/10704	0.146192	0.433006	0.36657	11174/117248/55901/7057	4
R-HSA-2559582	Senescence-Associated Secretory Phenotype (SASP)	4/196	112/10704	0.149581	0.433006	0.36657	4790/3552/3569/3576	4
R-HSA-983705	Signaling by the B Cell Receptor (BCR)	4/196	112/10704	0.149581	0.433006	0.36657	4792/4790/4794/4067	4
R-HSA-8950505	Gene and protein expression by JAK-STAT signaling after Interleukin-12 stimulation	2/196	38/10704	0.153157	0.433006	0.36657	5898/6648	2
R-HSA-112411	MAPK1 (ERK2) activation	1/196	9/10704	0.153283	0.433006	0.36657	3569	1
R-HSA-1247673	Erythrocytes take up oxygen and release carbon dioxide	1/196	9/10704	0.153283	0.433006	0.36657	760	1
R-HSA-198203	PI3K/AKT activation	1/196	9/10704	0.153283	0.433006	0.36657	3667	1
R-HSA-427601	Multifunctional anion exchangers	1/196	9/10704	0.153283	0.433006	0.36657	1836	1
R-HSA-447041	CHL1 interactions	1/196	9/10704	0.153283	0.433006	0.36657	3673	1
R-HSA-5687613	Diseases associated with surfactant metabolism	1/196	9/10704	0.153283	0.433006	0.36657	21	1
R-HSA-8985947	Interleukin-9 signaling	1/196	9/10704	0.153283	0.433006	0.36657	3718	1
R-HSA-9020933	Interleukin-23 signaling	1/196	9/10704	0.153283	0.433006	0.36657	51561	1
R-HSA-2219530	Constitutive Signaling by Aberrant PI3K in Cancer	3/196	75/10704	0.158148	0.444701	0.376471	4254/2250/3667	3
R-HSA-8853884	Transcriptional Regulation by VENTX	2/196	39/10704	0.159592	0.445187	0.376882	4790/3569	2
R-HSA-5668914	Diseases of metabolism	7/196	245/10704	0.163109	0.445187	0.376882	11174/2683/55901/7057/1836/21/4128	7
R-HSA-110056	MAPK3 (ERK1) activation	1/196	10/10704	0.1688	0.445187	0.376882	3569	1
R-HSA-112311	Neurotransmitter clearance	1/196	10/10704	0.1688	0.445187	0.376882	4128	1
R-HSA-1483115	Hydrolysis of LPC	1/196	10/10704	0.1688	0.445187	0.376882	8605	1
R-HSA-209968	Thyroxine biosynthesis	1/196	10/10704	0.1688	0.445187	0.376882	1734	1
R-HSA-5602498	MyD88 deficiency (TLR2/4)	1/196	10/10704	0.1688	0.445187	0.376882	7097	1
R-HSA-74749	Signal attenuation	1/196	10/10704	0.1688	0.445187	0.376882	3667	1
R-HSA-8964058	HDL remodeling	1/196	10/10704	0.1688	0.445187	0.376882	9388	1
R-HSA-9020958	Interleukin-21 signaling	1/196	10/10704	0.1688	0.445187	0.376882	3718	1
R-HSA-937042	IRAK2 mediated activation of TAK1 complex	1/196	10/10704	0.1688	0.445187	0.376882	3656	1
R-HSA-3560782	Diseases associated with glycosaminoglycan metabolism	2/196	41/10704	0.172606	0.445187	0.376882	2683/1836	2
R-HSA-6806834	Signaling by MET	3/196	79/10704	0.176063	0.445187	0.376882	3918/3673/3914	3
R-HSA-5688426	Deubiquitination	8/196	297/10704	0.178482	0.445187	0.376882	330/1540/4792/8767/23586/64135/7128/10318	8
R-HSA-2426168	Activation of gene expression by SREBF (SREBP)	2/196	42/10704	0.179177	0.445187	0.376882	6713/3157	2
R-HSA-1169410	Antiviral mechanism by IFN-stimulated genes	3/196	80/10704	0.180628	0.445187	0.376882	23586/8638/4600	3
R-HSA-1059683	Interleukin-6 signaling	1/196	11/10704	0.184034	0.445187	0.376882	3569	1
R-HSA-1839122	Signaling by activated point mutants of FGFR1	1/196	11/10704	0.184034	0.445187	0.376882	2250	1
R-HSA-193692	Regulated proteolysis of p75NTR	1/196	11/10704	0.184034	0.445187	0.376882	4790	1
R-HSA-196025	Formation of annular gap junctions	1/196	11/10704	0.184034	0.445187	0.376882	1601	1
R-HSA-2022923	Dermatan sulfate biosynthesis	1/196	11/10704	0.184034	0.445187	0.376882	29940	1
R-HSA-2534343	Interaction With Cumulus Cells And The Zona Pellucida	1/196	11/10704	0.184034	0.445187	0.376882	2683	1
R-HSA-2586552	Signaling by Leptin	1/196	11/10704	0.184034	0.445187	0.376882	3667	1
R-HSA-3371378	Regulation by c-FLIP	1/196	11/10704	0.184034	0.445187	0.376882	8743	1
R-HSA-351906	Apoptotic cleavage of cell adhesion proteins	1/196	11/10704	0.184034	0.445187	0.376882	1832	1
R-HSA-5218900	CASP8 activity is inhibited	1/196	11/10704	0.184034	0.445187	0.376882	8743	1
R-HSA-5603041	IRAK4 deficiency (TLR2/4)	1/196	11/10704	0.184034	0.445187	0.376882	7097	1
R-HSA-5661231	Metallothioneins bind metals	1/196	11/10704	0.184034	0.445187	0.376882	4502	1
R-HSA-68689	CDC6 association with the ORC:origin complex	1/196	11/10704	0.184034	0.445187	0.376882	1870	1
R-HSA-69416	Dimerization of procaspase-8	1/196	11/10704	0.184034	0.445187	0.376882	8743	1
R-HSA-73614	Pyrimidine salvage	1/196	11/10704	0.184034	0.445187	0.376882	1890	1
R-HSA-8963691	Phenylalanine and tyrosine metabolism	1/196	11/10704	0.184034	0.445187	0.376882	259307	1
R-HSA-9013700	NOTCH4 Activation and Transmission of Signal to the Nucleus	1/196	11/10704	0.184034	0.445187	0.376882	182	1
R-HSA-1433557	Signaling by SCF-KIT	2/196	43/10704	0.185786	0.445187	0.376882	4254/4067	2
R-HSA-2871837	FCERI mediated NF-kB activation	3/196	82/10704	0.189853	0.445187	0.376882	4792/4790/4067	3
R-HSA-109704	PI3K Cascade	2/196	44/10704	0.192429	0.445187	0.376882	2250/3667	2
R-HSA-451927	Interleukin-2 family signaling	2/196	44/10704	0.192429	0.445187	0.376882	3718/3965	2
R-HSA-1630316	Glycosaminoglycan metabolism	4/196	124/10704	0.192436	0.445187	0.376882	960/2683/29940/1836	4
R-HSA-1168372	Downstream signaling events of B Cell Receptor (BCR)	3/196	83/10704	0.19451	0.445187	0.376882	4792/4790/4794	3
R-HSA-381426	Regulation of Insulin-like Growth Factor (IGF) transport and uptake by Insulin-like Growth Factor Binding Proteins (IGFBPs)	4/196	125/10704	0.196171	0.445187	0.376882	8614/718/3569/1435	4
R-HSA-112308	Presynaptic depolarization and calcium channel opening	1/196	12/10704	0.198991	0.445187	0.376882	773	1
R-HSA-1474151	Tetrahydrobiopterin (BH4) synthesis, recycling, salvage and regulation	1/196	12/10704	0.198991	0.445187	0.376882	2643	1
R-HSA-1475029	Reversible hydration of carbon dioxide	1/196	12/10704	0.198991	0.445187	0.376882	760	1
R-HSA-174403	Glutathione synthesis and recycling	1/196	12/10704	0.198991	0.445187	0.376882	55748	1
R-HSA-1839130	Signaling by activated point mutants of FGFR3	1/196	12/10704	0.198991	0.445187	0.376882	2250	1
R-HSA-190373	FGFR1c ligand binding and activation	1/196	12/10704	0.198991	0.445187	0.376882	2250	1
R-HSA-190873	Gap junction degradation	1/196	12/10704	0.198991	0.445187	0.376882	1601	1
R-HSA-2029481	FCGR activation	1/196	12/10704	0.198991	0.445187	0.376882	4067	1
R-HSA-2033514	FGFR3 mutant receptor activation	1/196	12/10704	0.198991	0.445187	0.376882	2250	1
R-HSA-209822	Glycoprotein hormones	1/196	12/10704	0.198991	0.445187	0.376882	3624	1
R-HSA-210990	PECAM1 interactions	1/196	12/10704	0.198991	0.445187	0.376882	4067	1
R-HSA-2160916	Hyaluronan uptake and degradation	1/196	12/10704	0.198991	0.445187	0.376882	960	1
R-HSA-73621	Pyrimidine catabolism	1/196	12/10704	0.198991	0.445187	0.376882	1890	1
R-HSA-9013973	TICAM1-dependent activation of IRF3/IRF7	1/196	12/10704	0.198991	0.445187	0.376882	9641	1
R-HSA-9020558	Interleukin-2 signaling	1/196	12/10704	0.198991	0.445187	0.376882	3718	1
R-HSA-9027276	Erythropoietin activates Phosphoinositide-3-kinase (PI3K)	1/196	12/10704	0.198991	0.445187	0.376882	4067	1
R-HSA-69231	Cyclin D associated events in G1	2/196	47/10704	0.21253	0.450111	0.381051	1870/4067	2
R-HSA-69236	G1 Phase	2/196	47/10704	0.21253	0.450111	0.381051	1870/4067	2
R-HSA-9020591	Interleukin-12 signaling	2/196	47/10704	0.21253	0.450111	0.381051	5898/6648	2
R-HSA-1237044	Erythrocytes take up carbon dioxide and release oxygen	1/196	13/10704	0.213674	0.450111	0.381051	760	1
R-HSA-1480926	O2/CO2 exchange in erythrocytes	1/196	13/10704	0.213674	0.450111	0.381051	760	1
R-HSA-1679131	Trafficking and processing of endosomal TLR	1/196	13/10704	0.213674	0.450111	0.381051	1520	1
R-HSA-171007	p38MAPK events	1/196	13/10704	0.213674	0.450111	0.381051	5898	1
R-HSA-190239	FGFR3 ligand binding and activation	1/196	13/10704	0.213674	0.450111	0.381051	2250	1
R-HSA-190372	FGFR3c ligand binding and activation	1/196	13/10704	0.213674	0.450111	0.381051	2250	1
R-HSA-190375	FGFR2c ligand binding and activation	1/196	13/10704	0.213674	0.450111	0.381051	2250	1
R-HSA-202670	ERKs are inactivated	1/196	13/10704	0.213674	0.450111	0.381051	1846	1
R-HSA-209543	p75NTR recruits signalling complexes	1/196	13/10704	0.213674	0.450111	0.381051	8767	1
R-HSA-5140745	WNT5A-dependent internalization of FZD2, FZD5 and ROR2	1/196	13/10704	0.213674	0.450111	0.381051	4919	1
R-HSA-5654227	Phospholipase C-mediated cascade; FGFR3	1/196	13/10704	0.213674	0.450111	0.381051	2250	1
R-HSA-5658623	FGFRL1 modulation of FGFR1 signaling	1/196	13/10704	0.213674	0.450111	0.381051	2250	1
R-HSA-74217	Purine salvage	1/196	13/10704	0.213674	0.450111	0.381051	2766	1
R-HSA-879415	Advanced glycosylation endproduct receptor signaling	1/196	13/10704	0.213674	0.450111	0.381051	6288	1
R-HSA-112399	IRS-mediated signalling	2/196	48/10704	0.219277	0.458761	0.388373	2250/3667	2
R-HSA-512988	Interleukin-3, Interleukin-5 and GM-CSF signaling	2/196	48/10704	0.219277	0.458761	0.388373	3718/4067	2
R-HSA-198933	Immunoregulatory interactions between a Lymphoid and a non-Lymphoid cell	4/196	132/10704	0.22291	0.459932	0.389364	3383/718/7412/3134	4
R-HSA-9012852	Signaling by NOTCH3	2/196	49/10704	0.226042	0.459932	0.389364	182/54492	2
R-HSA-1474290	Collagen formation	3/196	90/10704	0.227836	0.459932	0.389364	3918/1520/3914	3
R-HSA-162658	Golgi Cisternae Pericentriolar Stack Reorganization	1/196	14/10704	0.22809	0.459932	0.389364	8548	1
R-HSA-209952	Peptide hormone biosynthesis	1/196	14/10704	0.22809	0.459932	0.389364	3624	1
R-HSA-399955	SEMA3A-Plexin repulsion signaling by inhibiting Integrin adhesion	1/196	14/10704	0.22809	0.459932	0.389364	10371	1
R-HSA-418885	DCC mediated attractive signaling	1/196	14/10704	0.22809	0.459932	0.389364	22885	1
R-HSA-5660526	Response to metal ions	1/196	14/10704	0.22809	0.459932	0.389364	4502	1
R-HSA-8941856	RUNX3 regulates NOTCH signaling	1/196	14/10704	0.22809	0.459932	0.389364	182	1
R-HSA-8983432	Interleukin-15 signaling	1/196	14/10704	0.22809	0.459932	0.389364	3718	1
R-HSA-9027284	Erythropoietin activates RAS	1/196	14/10704	0.22809	0.459932	0.389364	4067	1
R-HSA-373752	Netrin-1 signaling	2/196	50/10704	0.232822	0.467934	0.396139	59277/22885	2
R-HSA-975577	N-Glycan antennae elongation	1/196	15/10704	0.242243	0.485278	0.410822	2683	1
R-HSA-2428928	IRS-related events triggered by IGF1R	2/196	52/10704	0.246417	0.489135	0.414087	2250/3667	2
R-HSA-381119	Unfolded Protein Response (UPR)	3/196	94/10704	0.247343	0.489135	0.414087	6347/3576/2081	3
R-HSA-109606	Intrinsic Pathway for Apoptosis	2/196	53/10704	0.253226	0.489135	0.414087	90427/10018	2
R-HSA-2428924	IGF1R signaling cascade	2/196	53/10704	0.253226	0.489135	0.414087	2250/3667	2
R-HSA-139853	Elevation of cytosolic Ca2+ levels	1/196	16/10704	0.256138	0.489135	0.414087	5027	1
R-HSA-190242	FGFR1 ligand binding and activation	1/196	16/10704	0.256138	0.489135	0.414087	2250	1
R-HSA-2559584	Formation of Senescence-Associated Heterochromatin Foci (SAHF)	1/196	16/10704	0.256138	0.489135	0.414087	8091	1
R-HSA-2730905	Role of LAT2/NTAL/LAB on calcium mobilization	1/196	16/10704	0.256138	0.489135	0.414087	4067	1
R-HSA-391160	Signal regulatory protein family interactions	1/196	16/10704	0.256138	0.489135	0.414087	961	1
R-HSA-399954	Sema3A PAK dependent Axon repulsion	1/196	16/10704	0.256138	0.489135	0.414087	10371	1
R-HSA-399956	CRMPs in Sema3A signaling	1/196	16/10704	0.256138	0.489135	0.414087	10371	1
R-HSA-5654219	Phospholipase C-mediated cascade: FGFR1	1/196	16/10704	0.256138	0.489135	0.414087	2250	1
R-HSA-5684264	MAP3K8 (TPL2)-dependent MAPK1/3 activation	1/196	16/10704	0.256138	0.489135	0.414087	4790	1
R-HSA-9614657	FOXO-mediated transcription of cell death genes	1/196	16/10704	0.256138	0.489135	0.414087	10018	1
R-HSA-975163	IRAK2 mediated activation of TAK1 complex upon TLR7/8 or 9 stimulation	1/196	16/10704	0.256138	0.489135	0.414087	3656	1
R-HSA-2404192	Signaling by Type 1 Insulin-like Growth Factor 1 Receptor (IGF1R)	2/196	54/10704	0.26004	0.49348	0.417765	2250/3667	2
R-HSA-74751	Insulin receptor signalling cascade	2/196	54/10704	0.26004	0.49348	0.417765	2250/3667	2
R-HSA-1236975	Antigen processing-Cross presentation	3/196	98/10704	0.267099	0.49348	0.417765	7097/1520/3134	3
R-HSA-202424	Downstream TCR signaling	3/196	98/10704	0.267099	0.49348	0.417765	4792/8767/4790	3
R-HSA-5357801	Programmed Cell Death	5/196	190/10704	0.268769	0.49348	0.417765	330/1832/90427/8743/10018	5
R-HSA-140534	Caspase activation via Death Receptors in the presence of ligand	1/196	17/10704	0.269779	0.49348	0.417765	8743	1
R-HSA-1482922	Acyl chain remodelling of PI	1/196	17/10704	0.269779	0.49348	0.417765	8605	1
R-HSA-2033519	Activated point mutants of FGFR2	1/196	17/10704	0.269779	0.49348	0.417765	2250	1
R-HSA-2142845	Hyaluronan metabolism	1/196	17/10704	0.269779	0.49348	0.417765	960	1
R-HSA-3781860	Diseases associated with N-glycosylation of proteins	1/196	17/10704	0.269779	0.49348	0.417765	2683	1
R-HSA-9034015	Signaling by NTRK3 (TRKC)	1/196	17/10704	0.269779	0.49348	0.417765	3667	1
R-HSA-937072	TRAF6-mediated induction of TAK1 complex within TLR4 complex	1/196	17/10704	0.269779	0.49348	0.417765	3656	1
R-HSA-9659787	Aberrant regulation of mitotic G1/S transition in cancer due to RB1 defects	1/196	17/10704	0.269779	0.49348	0.417765	1870	1
R-HSA-9661069	Defective binding of RB1 mutants to E2F1,(E2F2, E2F3)	1/196	17/10704	0.269779	0.49348	0.417765	1870	1
R-HSA-5684996	MAPK1/MAPK3 signaling	7/196	286/10704	0.270488	0.49348	0.417765	4254/3718/5924/1846/3569/2250/3667	7
R-HSA-5663202	Diseases of signal transduction by growth factor receptors and second messengers	9/196	387/10704	0.278793	0.497375	0.421063	9734/4254/182/3791/2250/10018/3667/54492/4067	9
R-HSA-8856828	Clathrin-mediated endocytosis	4/196	146/10704	0.278847	0.497375	0.421063	84251/3949/1601/3575	4
R-HSA-2219528	PI3K/AKT Signaling in Cancer	3/196	101/10704	0.282037	0.497375	0.421063	4254/2250/3667	3
R-HSA-1369062	ABC transporters in lipid homeostasis	1/196	18/10704	0.283171	0.497375	0.421063	21	1
R-HSA-181430	Norepinephrine Neurotransmitter Release Cycle	1/196	18/10704	0.283171	0.497375	0.421063	4128	1
R-HSA-1912420	Pre-NOTCH Processing in Golgi	1/196	18/10704	0.283171	0.497375	0.421063	2683	1
R-HSA-209776	Metabolism of amine-derived hormones	1/196	18/10704	0.283171	0.497375	0.421063	1734	1
R-HSA-210993	Tie2 Signaling	1/196	18/10704	0.283171	0.497375	0.421063	285	1
R-HSA-446353	Cell-extracellular matrix interactions	1/196	18/10704	0.283171	0.497375	0.421063	55679	1
R-HSA-5654221	Phospholipase C-mediated cascade; FGFR2	1/196	18/10704	0.283171	0.497375	0.421063	2250	1
R-HSA-5654704	SHC-mediated cascade:FGFR3	1/196	18/10704	0.283171	0.497375	0.421063	2250	1
R-HSA-5654710	PI-3K cascade:FGFR3	1/196	18/10704	0.283171	0.497375	0.421063	2250	1
R-HSA-936964	Activation of IRF3/IRF7 mediated by TBK1/IKK epsilon	1/196	18/10704	0.283171	0.497375	0.421063	9641	1
R-HSA-193648	NRAGE signals death through JNK	2/196	59/10704	0.294094	0.513118	0.43439	5924/10018	2
R-HSA-5676590	NIK-->noncanonical NF-kB signaling	2/196	59/10704	0.294094	0.513118	0.43439	4791/5971	2
R-HSA-197264	Nicotinamide salvaging	1/196	19/10704	0.296319	0.513118	0.43439	10135	1
R-HSA-5686938	Regulation of TLR by endogenous ligand	1/196	19/10704	0.296319	0.513118	0.43439	7097	1
R-HSA-8964038	LDL clearance	1/196	19/10704	0.296319	0.513118	0.43439	3949	1
R-HSA-5607761	Dectin-1 mediated noncanonical NF-kB signaling	2/196	60/10704	0.300887	0.519559	0.439843	4791/5971	2
R-HSA-167044	Signalling to RAS	1/196	20/10704	0.309227	0.522193	0.442073	5898	1
R-HSA-168927	TICAM1, RIP1-mediated IKK complex recruitment	1/196	20/10704	0.309227	0.522193	0.442073	330	1
R-HSA-190241	FGFR2 ligand binding and activation	1/196	20/10704	0.309227	0.522193	0.442073	2250	1
R-HSA-5654706	FRS-mediated FGFR3 signaling	1/196	20/10704	0.309227	0.522193	0.442073	2250	1
R-HSA-8978934	Metabolism of cofactors	1/196	20/10704	0.309227	0.522193	0.442073	2643	1
R-HSA-9669938	Signaling by KIT in disease	1/196	20/10704	0.309227	0.522193	0.442073	4067	1
R-HSA-9670439	Signaling by phosphorylated juxtamembrane, extracellular and kinase domain KIT mutants	1/196	20/10704	0.309227	0.522193	0.442073	4067	1
R-HSA-9671555	Signaling by PDGFR in disease	1/196	20/10704	0.309227	0.522193	0.442073	3791	1
R-HSA-425393	Transport of inorganic cations/anions and amino acids/oligopeptides	3/196	108/10704	0.317132	0.531872	0.450266	6542/6558/1836	3
R-HSA-189200	Cellular hexose transport	1/196	21/10704	0.321899	0.531872	0.450266	11182	1
R-HSA-389513	CTLA4 inhibitory signaling	1/196	21/10704	0.321899	0.531872	0.450266	4067	1
R-HSA-442982	Ras activation upon Ca2+ influx through NMDA receptor	1/196	21/10704	0.321899	0.531872	0.450266	5924	1
R-HSA-5218921	VEGFR2 mediated cell proliferation	1/196	21/10704	0.321899	0.531872	0.450266	3791	1
R-HSA-5654688	SHC-mediated cascade:FGFR1	1/196	21/10704	0.321899	0.531872	0.450266	2250	1
R-HSA-5654689	PI-3K cascade:FGFR1	1/196	21/10704	0.321899	0.531872	0.450266	2250	1
R-HSA-9008059	Interleukin-37 signaling	1/196	21/10704	0.321899	0.531872	0.450266	10068	1
R-HSA-421270	Cell-cell junction organization	2/196	64/10704	0.327932	0.540382	0.457471	23562/9076	2
R-HSA-140875	Common Pathway of Fibrin Clot Formation	1/196	22/10704	0.33434	0.542703	0.459436	5270	1
R-HSA-198753	ERK/MAPK targets	1/196	22/10704	0.33434	0.542703	0.459436	1846	1
R-HSA-5655332	Signaling by FGFR3 in disease	1/196	22/10704	0.33434	0.542703	0.459436	2250	1
R-HSA-8853338	Signaling by FGFR3 point mutants in cancer	1/196	22/10704	0.33434	0.542703	0.459436	2250	1
R-HSA-912631	Regulation of signaling by CBL	1/196	22/10704	0.33434	0.542703	0.459436	4067	1
R-HSA-9614085	FOXO-mediated transcription	2/196	65/10704	0.334652	0.542703	0.459436	6648/10018	2
R-HSA-140837	Intrinsic Pathway of Fibrin Clot Formation	1/196	23/10704	0.346554	0.553224	0.468342	5270	1
R-HSA-1482801	Acyl chain remodelling of PS	1/196	23/10704	0.346554	0.553224	0.468342	51365	1
R-HSA-5654693	FRS-mediated FGFR1 signaling	1/196	23/10704	0.346554	0.553224	0.468342	2250	1
R-HSA-5654695	PI-3K cascade:FGFR2	1/196	23/10704	0.346554	0.553224	0.468342	2250	1
R-HSA-5654699	SHC-mediated cascade:FGFR2	1/196	23/10704	0.346554	0.553224	0.468342	2250	1
R-HSA-73980	RNA Polymerase III Transcription Termination	1/196	23/10704	0.346554	0.553224	0.468342	4774	1
R-HSA-156584	Cytosolic sulfonation of small molecules	1/196	24/10704	0.358545	0.567928	0.480791	1836	1
R-HSA-379716	Cytosolic tRNA aminoacylation	1/196	24/10704	0.358545	0.567928	0.480791	7453	1
R-HSA-6783589	Interleukin-6 family signaling	1/196	24/10704	0.358545	0.567928	0.480791	3569	1
R-HSA-1989781	PPARA activates gene expression	3/196	117/10704	0.36233	0.572444	0.484614	3157/50486/27242	3
R-HSA-983169	Class I MHC mediated antigen processing & presentation	8/196	370/10704	0.366831	0.573244	0.485291	7704/7097/57520/55008/1520/84541/80176/3134	8
R-HSA-174824	Plasma lipoprotein assembly, remodeling, and clearance	2/196	70/10704	0.367935	0.573244	0.485291	9388/3949	2
R-HSA-1187000	Fertilization	1/196	25/10704	0.370317	0.573244	0.485291	2683	1
R-HSA-5654700	FRS-mediated FGFR2 signaling	1/196	25/10704	0.370317	0.573244	0.485291	2250	1
R-HSA-5654708	Downstream signaling of activated FGFR3	1/196	25/10704	0.370317	0.573244	0.485291	2250	1
R-HSA-9006335	Signaling by Erythropoietin	1/196	25/10704	0.370317	0.573244	0.485291	4067	1
R-HSA-937041	IKK complex recruitment mediated by RIP1	1/196	25/10704	0.370317	0.573244	0.485291	330	1
R-HSA-983170	Antigen Presentation: Folding, assembly and peptide loading of class I MHC	1/196	25/10704	0.370317	0.573244	0.485291	3134	1
R-HSA-400206	Regulation of lipid metabolism by PPARalpha	3/196	119/10704	0.372331	0.573947	0.485887	3157/50486/27242	3
R-HSA-9662851	Anti-inflammatory response favouring Leishmania parasite infection	4/196	169/10704	0.374263	0.573947	0.485887	79651/3569/11245/4067	4
R-HSA-9664433	Leishmania parasite growth and survival	4/196	169/10704	0.374263	0.573947	0.485887	79651/3569/11245/4067	4
R-HSA-3214841	PKMTs methylate histone lysines	2/196	71/10704	0.374517	0.573947	0.485887	4791/4790	2
R-HSA-5689880	Ub-specific processing proteases	5/196	220/10704	0.376771	0.575367	0.487088	330/1540/4792/23586/64135	5
R-HSA-202403	TCR signaling	3/196	120/10704	0.37732	0.575367	0.487088	4792/8767/4790	3
R-HSA-1169408	ISG15 antiviral mechanism	2/196	72/10704	0.381072	0.579428	0.490527	23586/4600	2
R-HSA-975576	N-glycan antennae elongation in the medial/trans-Golgi	1/196	26/10704	0.381874	0.579428	0.490527	2683	1
R-HSA-5683057	MAPK family signaling cascades	7/196	325/10704	0.385575	0.583599	0.494057	4254/3718/5924/1846/3569/2250/3667	7
R-HSA-5357769	Caspase activation via extrinsic apoptotic signalling pathway	1/196	27/10704	0.39322	0.590794	0.500149	8743	1
R-HSA-912526	Interleukin receptor SHC signaling	1/196	27/10704	0.39322	0.590794	0.500149	3718	1
R-HSA-9635486	Infection with Mycobacterium tuberculosis	1/196	27/10704	0.39322	0.590794	0.500149	7097	1
R-HSA-1482788	Acyl chain remodelling of PC	1/196	28/10704	0.404359	0.601632	0.509323	8605	1
R-HSA-201451	Signaling by BMP	1/196	28/10704	0.404359	0.601632	0.509323	4091	1
R-HSA-2022854	Keratan sulfate biosynthesis	1/196	28/10704	0.404359	0.601632	0.509323	2683	1
R-HSA-350054	Notch-HLH transcription pathway	1/196	28/10704	0.404359	0.601632	0.509323	9734	1
R-HSA-5673001	RAF/MAP kinase cascade	6/196	280/10704	0.40677	0.602619	0.510159	4254/3718/5924/1846/2250/3667	6
R-HSA-204998	Cell death signalling via NRAGE, NRIF and NADE	2/196	76/10704	0.406989	0.602619	0.510159	5924/10018	2
R-HSA-109581	Apoptosis	4/196	178/10704	0.411641	0.60326	0.510701	1832/90427/8743/10018	4
R-HSA-1296041	Activation of G protein gated Potassium channels	1/196	29/10704	0.415295	0.60326	0.510701	3759	1
R-HSA-1296059	G protein gated Potassium channels	1/196	29/10704	0.415295	0.60326	0.510701	3759	1
R-HSA-442742	CREB1 phosphorylation through NMDA receptor-mediated activation of RAS signaling	1/196	29/10704	0.415295	0.60326	0.510701	5924	1
R-HSA-5654732	Negative regulation of FGFR3 signaling	1/196	29/10704	0.415295	0.60326	0.510701	2250	1
R-HSA-5683826	Surfactant metabolism	1/196	29/10704	0.415295	0.60326	0.510701	21	1
R-HSA-9615017	FOXO-mediated transcription of oxidative stress, metabolic and neuronal genes	1/196	29/10704	0.415295	0.60326	0.510701	6648	1
R-HSA-997272	Inhibition of voltage gated Ca2+ channels via Gbeta/gamma subunits	1/196	29/10704	0.415295	0.60326	0.510701	3759	1
R-HSA-74752	Signaling by Insulin receptor	2/196	78/10704	0.419752	0.608293	0.514963	2250/3667	2
R-HSA-1482839	Acyl chain remodelling of PE	1/196	30/10704	0.42603	0.610179	0.516559	8605	1
R-HSA-3928663	EPHA-mediated growth cone collapse	1/196	30/10704	0.42603	0.610179	0.516559	4067	1
R-HSA-4090294	SUMOylation of intracellular receptors	1/196	30/10704	0.42603	0.610179	0.516559	4929	1
R-HSA-418360	Platelet calcium homeostasis	1/196	30/10704	0.42603	0.610179	0.516559	5027	1
R-HSA-5654696	Downstream signaling of activated FGFR2	1/196	30/10704	0.42603	0.610179	0.516559	2250	1
R-HSA-3108232	SUMO E3 ligases SUMOylate target proteins	4/196	182/10704	0.428121	0.611743	0.517883	4791/4792/4929/9641	4
R-HSA-157118	Signaling by NOTCH	5/196	236/10704	0.434915	0.615212	0.52082	9734/2683/182/92737/54492	5
R-HSA-1839124	FGFR1 mutant receptor activation	1/196	31/10704	0.43657	0.615212	0.52082	2250	1
R-HSA-196807	Nicotinate metabolism	1/196	31/10704	0.43657	0.615212	0.52082	10135	1
R-HSA-450282	MAPK targets/ Nuclear events mediated by MAP kinases	1/196	31/10704	0.43657	0.615212	0.52082	1846	1
R-HSA-5654687	Downstream signaling of activated FGFR1	1/196	31/10704	0.43657	0.615212	0.52082	2250	1
R-HSA-8963899	Plasma lipoprotein remodeling	1/196	31/10704	0.43657	0.615212	0.52082	9388	1
R-HSA-2454202	Fc epsilon receptor (FCERI) signaling	3/196	134/10704	0.446046	0.620019	0.524889	4792/4790/4067	3
R-HSA-1251985	Nuclear signaling by ERBB4	1/196	32/10704	0.446916	0.620019	0.524889	10608	1
R-HSA-2173796	SMAD2/SMAD3:SMAD4 heterotrimer regulates transcription	1/196	32/10704	0.446916	0.620019	0.524889	3726	1
R-HSA-2871796	FCERI mediated MAPK activation	1/196	32/10704	0.446916	0.620019	0.524889	4067	1
R-HSA-8941326	RUNX2 regulates bone development	1/196	32/10704	0.446916	0.620019	0.524889	4091	1
R-HSA-983695	Antigen activates B Cell Receptor (BCR) leading to generation of second messengers	1/196	32/10704	0.446916	0.620019	0.524889	4067	1
R-HSA-1236974	ER-Phagosome pathway	2/196	83/10704	0.451033	0.620019	0.524889	7097/3134	2
R-HSA-9607240	FLT3 Signaling	6/196	294/10704	0.452494	0.620019	0.524889	4254/3718/5924/1846/2250/3667	6
R-HSA-2990846	SUMOylation	4/196	188/10704	0.452611	0.620019	0.524889	4791/4792/4929/9641	4
R-HSA-1839126	FGFR2 mutant receptor activation	1/196	33/10704	0.457074	0.620019	0.524889	2250	1
R-HSA-2871809	FCERI mediated Ca+2 mobilization	1/196	33/10704	0.457074	0.620019	0.524889	4067	1
R-HSA-352230	Amino acid transport across the plasma membrane	1/196	33/10704	0.457074	0.620019	0.524889	6542	1
R-HSA-389356	CD28 co-stimulation	1/196	33/10704	0.457074	0.620019	0.524889	4067	1
R-HSA-5654726	Negative regulation of FGFR1 signaling	1/196	33/10704	0.457074	0.620019	0.524889	2250	1
R-HSA-8964043	Plasma lipoprotein clearance	1/196	33/10704	0.457074	0.620019	0.524889	3949	1
R-HSA-1483255	PI Metabolism	2/196	84/10704	0.457175	0.620019	0.524889	57664/25816	2
R-HSA-381340	Transcriptional regulation of white adipocyte differentiation	2/196	84/10704	0.457175	0.620019	0.524889	4790/7124	2
R-HSA-1638074	Keratan sulfate/keratin metabolism	1/196	34/10704	0.467047	0.62923	0.532687	2683	1
R-HSA-187687	Signalling to ERKs	1/196	34/10704	0.467047	0.62923	0.532687	5898	1
R-HSA-5654727	Negative regulation of FGFR2 signaling	1/196	34/10704	0.467047	0.62923	0.532687	2250	1
R-HSA-114604	GPVI-mediated activation cascade	1/196	35/10704	0.476836	0.639608	0.541473	4067	1
R-HSA-1296065	Inwardly rectifying K+ channels	1/196	35/10704	0.476836	0.639608	0.541473	3759	1
R-HSA-156590	Glutathione conjugation	1/196	36/10704	0.486447	0.646838	0.547594	55748	1
R-HSA-5579029	Metabolic disorders of biological oxidation enzymes	1/196	36/10704	0.486447	0.646838	0.547594	4128	1
R-HSA-9675126	Diseases of mitotic cell cycle	1/196	36/10704	0.486447	0.646838	0.547594	1870	1
R-HSA-9687139	Aberrant regulation of mitotic cell cycle due to RB1 defects	1/196	36/10704	0.486447	0.646838	0.547594	1870	1
R-HSA-3299685	Detoxification of Reactive Oxygen Species	1/196	37/10704	0.495883	0.656536	0.555804	6648	1
R-HSA-8956319	Nucleobase catabolism	1/196	37/10704	0.495883	0.656536	0.555804	1890	1
R-HSA-111465	Apoptotic cleavage of cellular proteins	1/196	38/10704	0.505146	0.665923	0.563751	1832	1
R-HSA-5655302	Signaling by FGFR1 in disease	1/196	38/10704	0.505146	0.665923	0.563751	2250	1
R-HSA-140877	Formation of Fibrin Clot (Clotting Cascade)	1/196	39/10704	0.514239	0.676456	0.572668	5270	1
R-HSA-1461957	Beta defensins	1/196	40/10704	0.523166	0.682343	0.577651	7097	1
R-HSA-445355	Smooth Muscle Contraction	1/196	40/10704	0.523166	0.682343	0.577651	8291	1
R-HSA-5654741	Signaling by FGFR3	1/196	40/10704	0.523166	0.682343	0.577651	2250	1
R-HSA-9664323	FCGR3A-mediated IL10 synthesis	1/196	40/10704	0.523166	0.682343	0.577651	4067	1
R-HSA-8957322	Metabolism of steroids	3/196	151/10704	0.525141	0.683464	0.5786	6713/3157/3638	3
R-HSA-8878159	Transcriptional regulation by RUNX3	2/196	96/10704	0.527647	0.68527	0.580129	182/10018	2
R-HSA-74158	RNA Polymerase III Transcription	1/196	41/10704	0.53193	0.687919	0.582371	4774	1
R-HSA-749476	RNA Polymerase III Abortive And Retractive Initiation	1/196	41/10704	0.53193	0.687919	0.582371	4774	1
R-HSA-2173782	Binding and Uptake of Ligands by Scavenger Receptors	1/196	42/10704	0.540534	0.693196	0.586839	6288	1
R-HSA-3769402	Deactivation of the beta-catenin transactivating complex	1/196	42/10704	0.540534	0.693196	0.586839	64321	1
R-HSA-379724	tRNA Aminoacylation	1/196	42/10704	0.540534	0.693196	0.586839	7453	1
R-HSA-3928662	EPHB-mediated forward signaling	1/196	42/10704	0.540534	0.693196	0.586839	4067	1
R-HSA-1483257	Phospholipid metabolism	4/196	212/10704	0.546519	0.6953	0.58862	8605/57664/51365/25816	4
R-HSA-1660661	Sphingolipid de novo biosynthesis	1/196	43/10704	0.548981	0.6953	0.58862	8613	1
R-HSA-5655253	Signaling by FGFR2 in disease	1/196	43/10704	0.548981	0.6953	0.58862	2250	1
R-HSA-5675221	Negative regulation of MAPK pathway	1/196	43/10704	0.548981	0.6953	0.58862	1846	1
R-HSA-977444	GABA B receptor activation	1/196	43/10704	0.548981	0.6953	0.58862	3759	1
R-HSA-991365	Activation of GABAB receptors	1/196	43/10704	0.548981	0.6953	0.58862	3759	1
R-HSA-15869	Metabolism of nucleotides	2/196	101/10704	0.555142	0.701454	0.59383	1890/2766	2
R-HSA-2173793	Transcriptional activity of SMAD2/SMAD3:SMAD4 heterotrimer	1/196	44/10704	0.557272	0.701454	0.59383	3726	1
R-HSA-975634	Retinoid metabolism and transport	1/196	44/10704	0.557272	0.701454	0.59383	3949	1
R-HSA-211859	Biological oxidations	4/196	220/10704	0.575958	0.723489	0.612484	54498/55748/1836/4128	4
R-HSA-190828	Gap junction trafficking	1/196	47/10704	0.581249	0.727458	0.615844	1601	1
R-HSA-211945	Phase I - Functionalization of compounds	2/196	106/10704	0.581492	0.727458	0.615844	54498/4128	2
R-HSA-156580	Phase II - Conjugation of compounds	2/196	107/10704	0.586623	0.732306	0.619948	55748/1836	2
R-HSA-2122947	NOTCH1 Intracellular Domain Regulates Transcription	1/196	48/10704	0.588951	0.732306	0.619948	9734	1
R-HSA-6806667	Metabolism of fat-soluble vitamins	1/196	48/10704	0.588951	0.732306	0.619948	3949	1
R-HSA-157858	Gap junction trafficking and regulation	1/196	49/10704	0.596511	0.740165	0.626601	1601	1
R-HSA-983231	Factors involved in megakaryocyte development and platelet production	3/196	168/10704	0.597686	0.740165	0.626601	3659/9732/23764	3
R-HSA-1461973	Defensins	1/196	50/10704	0.603933	0.743396	0.629337	7097	1
R-HSA-1793185	Chondroitin sulfate/dermatan sulfate metabolism	1/196	50/10704	0.603933	0.743396	0.629337	29940	1
R-HSA-5654736	Signaling by FGFR1	1/196	50/10704	0.603933	0.743396	0.629337	2250	1
R-HSA-112310	Neurotransmitter release cycle	1/196	51/10704	0.61122	0.74786	0.633116	4128	1
R-HSA-350562	Regulation of ornithine decarboxylase (ODC)	1/196	51/10704	0.61122	0.74786	0.633116	4953	1
R-HSA-3928665	EPH-ephrin mediated repulsion of cells	1/196	51/10704	0.61122	0.74786	0.633116	4067	1
R-HSA-381070	IRE1alpha activates chaperones	1/196	52/10704	0.618373	0.752108	0.636712	2081	1
R-HSA-383280	Nuclear Receptor transcription pathway	1/196	52/10704	0.618373	0.752108	0.636712	4929	1
R-HSA-75153	Apoptotic execution phase	1/196	52/10704	0.618373	0.752108	0.636712	1832	1
R-HSA-1660499	Synthesis of PIPs at the plasma membrane	1/196	53/10704	0.625395	0.759143	0.642667	57664	1
R-HSA-180585	Vif-mediated degradation of APOBEC3G	1/196	54/10704	0.632288	0.765994	0.648467	60489	1
R-HSA-2151201	Transcriptional activation of mitochondrial biogenesis	1/196	56/10704	0.645699	0.780697	0.660915	6648	1
R-HSA-1236394	Signaling by ERBB4	1/196	58/10704	0.658623	0.794756	0.672816	10608	1
R-HSA-9664407	Parasite infection	1/196	59/10704	0.664908	0.797629	0.675249	4067	1
R-HSA-9664417	Leishmania phagocytosis	1/196	59/10704	0.664908	0.797629	0.675249	4067	1
R-HSA-9664422	FCGR3A-mediated phagocytosis	1/196	59/10704	0.664908	0.797629	0.675249	4067	1
R-HSA-977443	GABA receptor activation	1/196	60/10704	0.671078	0.803458	0.680184	3759	1
R-HSA-983168	Antigen processing: Ubiquitination & Proteasome degradation	5/196	309/10704	0.672469	0.803555	0.680266	7704/57520/55008/84541/80176	5
R-HSA-425407	SLC-mediated transmembrane transport	4/196	251/10704	0.679136	0.809724	0.685488	6542/6558/1836/11182	4
R-HSA-196854	Metabolism of vitamins and cofactors	3/196	190/10704	0.680274	0.809724	0.685488	10135/3949/2643	3
R-HSA-1483206	Glycerophospholipid biosynthesis	2/196	129/10704	0.687842	0.813692	0.688847	8605/51365	2
R-HSA-5576891	Cardiac conduction	2/196	129/10704	0.687842	0.813692	0.688847	3759/60598	2
R-HSA-1226099	Signaling by FGFR in disease	1/196	63/10704	0.688917	0.813692	0.688847	2250	1
R-HSA-913709	O-linked glycosylation of mucins	1/196	63/10704	0.688917	0.813692	0.688847	117248	1
R-HSA-373755	Semaphorin interactions	1/196	65/10704	0.700272	0.823929	0.697513	10371	1
R-HSA-8873719	RAB geranylgeranylation	1/196	65/10704	0.700272	0.823929	0.697513	115273	1
R-HSA-397014	Muscle contraction	3/196	197/10704	0.703776	0.826464	0.69966	3759/60598/8291	3
R-HSA-9660821	ADORA2B mediated anti-inflammatory cytokines production	2/196	134/10704	0.70781	0.829613	0.702325	3569/11245	2
R-HSA-6802952	Signaling by BRAF and RAF fusions	1/196	67/10704	0.711215	0.832012	0.704357	10018	1
R-HSA-68867	Assembly of the pre-replicative complex	1/196	68/10704	0.716536	0.835428	0.707248	1870	1
R-HSA-1257604	PIP3 activates AKT signaling	4/196	264/10704	0.71686	0.835428	0.707248	4254/8870/2250/3667	4
R-HSA-388841	Costimulation by the CD28 family	1/196	69/10704	0.721759	0.839542	0.710731	4067	1
R-HSA-112315	Transmission across Chemical Synapses	4/196	270/10704	0.733143	0.851168	0.720573	5924/3759/773/4128	4
R-HSA-1445148	Translocation of SLC2A4 (GLUT4) to the plasma membrane	1/196	72/10704	0.736863	0.853869	0.72286	5898	1
R-HSA-170834	Signaling by TGF-beta Receptor Complex	1/196	73/10704	0.741714	0.856253	0.724878	3726	1
R-HSA-5654738	Signaling by FGFR2	1/196	73/10704	0.741714	0.856253	0.724878	2250	1
R-HSA-6807505	RNA polymerase II transcribes snRNA genes	1/196	74/10704	0.746476	0.860131	0.728161	5452	1
R-HSA-3000178	ECM proteoglycans	1/196	76/10704	0.755739	0.869171	0.735814	3673	1
R-HSA-5619084	ABC transporter disorders	1/196	77/10704	0.760244	0.872428	0.738572	21	1
R-HSA-453279	Mitotic G1 phase and G1/S transition	2/196	149/10704	0.761418	0.872428	0.738572	1870/4067	2
R-HSA-422356	Regulation of insulin secretion	1/196	78/10704	0.764666	0.874515	0.740338	773	1
R-HSA-2559586	DNA Damage/Telomere Stress Induced Senescence	1/196	80/10704	0.773268	0.87943	0.744499	8091	1
R-HSA-416482	G alpha (12/13) signalling events	1/196	80/10704	0.773268	0.87943	0.744499	5924	1
R-HSA-438064	Post NMDA receptor activation events	1/196	80/10704	0.773268	0.87943	0.744499	5924	1
R-HSA-9679191	Potential therapeutics for SARS	1/196	81/10704	0.777451	0.88255	0.747141	3718	1
R-HSA-9013694	Signaling by NOTCH4	1/196	82/10704	0.781557	0.885572	0.749698	182	1
R-HSA-6802957	Oncogenic MAPK signaling	1/196	84/10704	0.789544	0.892488	0.755554	10018	1
R-HSA-5632684	Hedgehog 'on' state	1/196	85/10704	0.793428	0.892488	0.755554	64399	1
R-HSA-69002	DNA Replication Pre-Initiation	1/196	85/10704	0.793428	0.892488	0.755554	1870	1
R-HSA-71387	Metabolism of carbohydrates	4/196	295/10704	0.793484	0.892488	0.755554	960/2683/29940/1836	4
R-HSA-2029480	Fcgamma receptor (FCGR) dependent phagocytosis	1/196	86/10704	0.797241	0.895071	0.75774	4067	1
R-HSA-190236	Signaling by FGFR	1/196	87/10704	0.800984	0.897629	0.759906	2250	1
R-HSA-418346	Platelet homeostasis	1/196	88/10704	0.804658	0.900101	0.761998	5027	1
R-HSA-8951664	Neddylation	3/196	234/10704	0.806556	0.90058	0.762404	7704/84541/80176	3
R-HSA-428157	Sphingolipid metabolism	1/196	89/10704	0.808264	0.900847	0.76263	8613	1
R-HSA-2980736	Peptide hormone metabolism	1/196	90/10704	0.811805	0.903151	0.764581	3624	1
R-HSA-9006925	Intracellular signaling by second messengers	4/196	306/10704	0.816356	0.904687	0.765881	4254/8870/2250/3667	4
R-HSA-2682334	EPH-Ephrin signaling	1/196	92/10704	0.818691	0.904687	0.765881	4067	1
R-HSA-4086400	PCP/CE pathway	1/196	92/10704	0.818691	0.904687	0.765881	4919	1
R-HSA-71291	Metabolism of amino acids and derivatives	5/196	374/10704	0.820151	0.904687	0.765881	54498/259307/4953/6303/1734	5
R-HSA-163125	Post-translational modification: synthesis of GPI-anchored proteins	1/196	93/10704	0.82204	0.904687	0.765881	5329	1
R-HSA-442755	Activation of NMDA receptors and postsynaptic events	1/196	93/10704	0.82204	0.904687	0.765881	5924	1
R-HSA-1592230	Mitochondrial biogenesis	1/196	95/10704	0.828554	0.908593	0.769188	6648	1
R-HSA-6803157	Antimicrobial peptides	1/196	95/10704	0.828554	0.908593	0.769188	7097	1
R-HSA-5619115	Disorders of transmembrane transporters	2/196	175/10704	0.83435	0.912213	0.772252	1836/21	2
R-HSA-8936459	RUNX1 regulates genes involved in megakaryocyte differentiation and platelet function	1/196	97/10704	0.834831	0.912213	0.772252	7057	1
R-HSA-5619102	SLC transporter disorders	1/196	98/10704	0.837883	0.913918	0.773696	1836	1
R-HSA-4420097	VEGFA-VEGFR2 Pathway	1/196	99/10704	0.840879	0.915557	0.775083	3791	1
R-HSA-1296071	Potassium Channels	1/196	103/10704	0.852322	0.924731	0.78285	3759	1
R-HSA-382556	ABC-family proteins mediated transport	1/196	103/10704	0.852322	0.924731	0.78285	21	1
R-HSA-2187338	Visual phototransduction	1/196	104/10704	0.855052	0.926055	0.78397	3949	1
R-HSA-163685	Integration of energy metabolism	1/196	108/10704	0.86548	0.933447	0.790228	773	1
R-HSA-194138	Signaling by VEGF	1/196	108/10704	0.86548	0.933447	0.790228	3791	1
R-HSA-1912422	Pre-NOTCH Expression and Processing	1/196	109/10704	0.867969	0.933447	0.790228	2683	1
R-HSA-2672351	Stimuli-sensing channels	1/196	109/10704	0.867969	0.933447	0.790228	1831	1
R-HSA-977225	Amyloid fiber formation	1/196	110/10704	0.870411	0.934434	0.791064	6288	1
R-HSA-373760	L1CAM interactions	1/196	119/10704	0.890466	0.954293	0.807876	3673	1
R-HSA-112314	Neurotransmitter receptors and postsynaptic signal transmission	2/196	205/10704	0.893149	0.95526	0.808695	5924/3759	2
R-HSA-8878166	Transcriptional regulation by RUNX2	1/196	121/10704	0.894485	0.95526	0.808695	4091	1
R-HSA-196849	Metabolism of water-soluble vitamins and cofactors	1/196	123/10704	0.898358	0.956065	0.809375	10135	1
R-HSA-2132295	MHC class II antigen presentation	1/196	123/10704	0.898358	0.956065	0.809375	1520	1
R-HSA-2559580	Oxidative Stress Induced Senescence	1/196	125/10704	0.902088	0.958371	0.811328	1870	1
R-HSA-69306	DNA Replication	1/196	128/10704	0.907431	0.960996	0.813551	1870	1
R-HSA-114608	Platelet degranulation	1/196	129/10704	0.909146	0.960996	0.813551	7057	1
R-HSA-162909	Host Interactions of HIV factors	1/196	130/10704	0.91083	0.960996	0.813551	60489	1
R-HSA-6809371	Formation of the cornified envelope	1/196	130/10704	0.91083	0.960996	0.813551	1832	1
R-HSA-76005	Response to elevated platelet cytosolic Ca2+	1/196	134/10704	0.917261	0.966075	0.81785	7057	1
R-HSA-9609690	HCMV Early Events	1/196	135/10704	0.918795	0.966075	0.81785	4790	1
R-HSA-194840	Rho GTPase cycle	1/196	138/10704	0.92323	0.969075	0.82039	5924	1
R-HSA-68875	Mitotic Prophase	1/196	142/10704	0.928771	0.972947	0.823667	8548	1
R-HSA-1474165	Reproduction	1/196	143/10704	0.930093	0.972947	0.823667	2683	1
R-HSA-3858494	Beta-catenin independent WNT signaling	1/196	146/10704	0.933913	0.9749	0.825321	4919	1
R-HSA-9679506	SARS-CoV Infections	1/196	147/10704	0.93514	0.9749	0.825321	3718	1
R-HSA-5358351	Signaling by Hedgehog	1/196	149/10704	0.937526	0.975728	0.826022	64399	1
R-HSA-112316	Neuronal System	4/196	410/10704	0.946036	0.982916	0.832107	5924/3759/773/4128	4
R-HSA-9609646	HCMV Infection	1/196	160/10704	0.949171	0.984504	0.833452	4790	1
R-HSA-76002	Platelet activation, signaling and aggregation	2/196	263/10704	0.956043	0.989956	0.838067	7057/4067	2
R-HSA-9010553	Regulation of expression of SLITs and ROBOs	1/196	171/10704	0.958654	0.990987	0.83894	56956	1
R-HSA-3247509	Chromatin modifying enzymes	2/196	274/10704	0.963039	0.992173	0.839944	4791/4790	2
R-HSA-4839726	Chromatin organization	2/196	274/10704	0.963039	0.992173	0.839944	4791/4790	2
R-HSA-948021	Transport to the Golgi and subsequent modification	1/196	185/10704	0.96822	0.994777	0.842148	2683	1
R-HSA-983712	Ion channel transport	1/196	186/10704	0.968812	0.994777	0.842148	1831	1
R-HSA-69275	G2/M Transition	1/196	196/10704	0.974162	0.997908	0.844799	22822	1
R-HSA-453274	Mitotic G2-G2/M phases	1/196	198/10704	0.975117	0.997908	0.844799	22822	1
R-HSA-6805567	Keratinization	1/196	214/10704	0.981595	0.999338	0.846009	1832	1
R-HSA-416476	G alpha (q) signalling events	1/196	216/10704	0.982276	0.999338	0.846009	6288	1
R-HSA-376176	Signaling by ROBO receptors	1/196	218/10704	0.982932	0.999338	0.846009	56956	1
R-HSA-195721	Signaling by WNT	2/196	332/10704	0.985487	0.999338	0.846009	64321/4919	2
R-HSA-201681	TCF dependent signaling in response to WNT	1/196	233/10704	0.987142	0.999338	0.846009	64321	1
R-HSA-162906	HIV Infection	1/196	234/10704	0.987383	0.999338	0.846009	60489	1
R-HSA-8878171	Transcriptional regulation by RUNX1	1/196	239/10704	0.98852	0.999338	0.846009	7057	1
R-HSA-72203	Processing of Capped Intron-Containing Pre-mRNA	1/196	244/10704	0.989556	0.999338	0.846009	9589	1
R-HSA-72766	Translation	1/196	291/10704	0.995716	0.999815	0.846413	7453	1
R-HSA-1852241	Organelle biogenesis and maintenance	1/196	296/10704	0.996104	0.999815	0.846413	6648	1
R-HSA-446203	Asparagine N-linked glycosylation	1/196	304/10704	0.996654	0.999815	0.846413	2683	1
R-HSA-381753	Olfactory Signaling Pathway	1/196	394/10704	0.999401	0.999815	0.846413	64108	1
R-HSA-68886	M Phase	1/196	418/10704	0.999622	0.999815	0.846413	8548	1
R-HSA-194315	Signaling by Rho GTPases	1/196	455/10704	0.999815	0.999815	0.846413	5924	1

## Sheet: Reactome_treatment2
ID	Description	GeneRatio	BgRatio	pvalue	p.adjust	qvalue	geneID	Count
R-HSA-913531	Interferon Signaling	42/365	199/10704	4.60812e-22	4.7648e-19	4.12791e-19	960/3430/4938/3383/3717/23586/4940/4939/6772/2635/2633/3664/3437/3433/4502/3659/6737/10346/91543/8638/51191/5371/24138/115362/9246/4599/3455/2634/115361/7412/3660/7324/6773/3669/4600/11274/3434/9636/5696/3134/3105/3106	42
R-HSA-909733	Interferon alpha/beta signaling	26/365	70/10704	8.37272e-21	4.3287e-18	3.7501e-18	3430/4938/4940/4939/6772/3664/3437/3433/3659/91543/8638/24138/4599/3455/2634/3660/6773/3669/4600/11274/3434/9636/5696/3134/3105/3106	26
R-HSA-449147	Signaling by Interleukins	54/365	461/10704	7.55001e-16	2.60224e-13	2.25441e-13	5898/9235/5685/6196/4791/2920/3383/3717/3091/4792/8767/3718/1440/6347/4790/51561/6648/3977/604/3552/6364/6772/6382/1846/3553/3656/3601/3569/3557/10068/2247/1848/8878/7412/11009/2919/4088/3575/3965/3627/3576/6773/3726/4615/6288/1435/4128/57162/5696/1052/7124/5698/4067/6352	54
R-HSA-877300	Interferon gamma signaling	24/365	91/10704	2.14198e-15	5.53702e-13	4.79691e-13	960/4938/3383/3717/4940/4939/6772/2635/2633/3664/4502/3659/6737/10346/8638/5371/115362/2634/115361/7412/3660/3134/3105/3106	24
R-HSA-6783783	Interleukin-10 signaling	15/365	47/10704	2.0503e-11	4.24002e-09	3.67327e-09	2920/3383/1440/6347/3552/6364/3553/3569/3557/2919/3627/3576/1435/7124/6352	15
R-HSA-6785807	Interleukin-4 and Interleukin-13 signaling	19/365	108/10704	3.41693e-09	5.88851e-07	5.10141e-07	3383/3717/3091/3718/6347/51561/604/3552/6772/3553/3569/2247/7412/3576/3726/6288/4128/1052/7124	19
R-HSA-1169410	Antiviral mechanism by IFN-stimulated genes	14/365	80/10704	4.3728e-07	6.45925e-05	5.59587e-05	4938/23586/4940/4939/6772/8638/51191/9246/4599/7324/4600/11274/3434/9636	14
R-HSA-380108	Chemokine receptors bind chemokines	12/365	59/10704	5.43524e-07	7.02505e-05	6.08604e-05	6376/2920/6347/6364/6372/2921/6374/2919/3627/6373/3576/6352	12
R-HSA-9660826	Purinergic signaling in leishmaniasis infection	8/365	24/10704	7.71513e-07	7.97744e-05	6.91113e-05	4791/5027/4790/3552/3553/718/5025/4907	8
R-HSA-9664424	Cell recruitment (pro-inflammatory response)	8/365	24/10704	7.71513e-07	7.97744e-05	6.91113e-05	4791/5027/4790/3552/3553/718/5025/4907	8
R-HSA-9020702	Interleukin-1 signaling	15/365	103/10704	1.95388e-06	0.000173682	0.000150467	5685/4791/4792/8767/4790/3552/3553/3656/3557/8878/4615/6288/57162/5696/5698	15
R-HSA-168928	DDX58/IFIH1-mediated induction of interferon-alpha/beta	13/365	78/10704	2.01565e-06	0.000173682	0.000150467	4791/1540/4792/23586/79132/4790/64135/7128/51191/9246/6288/9636/9641	13
R-HSA-8983711	OAS antiviral response	5/365	9/10704	5.04908e-06	0.000392522	0.000340055	4938/23586/4940/4939/8638	5
R-HSA-446652	Interleukin-1 family signaling	17/365	140/10704	5.31461e-06	0.000392522	0.000340055	5685/4791/4792/8767/4790/3552/3553/3656/3557/10068/8878/4088/4615/6288/57162/5696/5698	17
R-HSA-73887	Death Receptor Signalling	17/365	141/10704	5.85814e-06	0.000403821	0.000349844	8837/330/7185/1540/4792/8717/8767/4790/5924/7128/8743/6868/10018/8878/55701/4615/7124	17
R-HSA-936440	Negative regulators of DDX58/IFIH1 signaling	8/365	34/10704	1.41212e-05	0.000912586	0.000790604	1540/23586/64135/7128/51191/9246/9636/9641	8
R-HSA-168898	Toll-like Receptor Cascades	17/365	155/10704	2.08241e-05	0.00126659	0.00109729	330/6196/4791/5641/4792/8767/4790/1846/3656/7097/1848/1520/7098/4615/6288/57162/9641	17
R-HSA-168164	Toll Like Receptor 3 (TLR3) Cascade	12/365	94/10704	7.91991e-05	0.00427517	0.00370373	330/6196/4791/4792/8767/4790/1846/3656/1848/7098/6288/9641	12
R-HSA-448706	Interleukin-1 processing	4/365	8/10704	8.35051e-05	0.00427517	0.00370373	4791/4790/3552/3553	4
R-HSA-166058	MyD88:MAL(TIRAP) cascade initiated on plasma membrane	12/365	95/10704	8.79182e-05	0.00427517	0.00370373	6196/4791/4792/8767/4790/1846/3656/7097/1848/4615/6288/57162	12
R-HSA-168188	Toll Like Receptor TLR6:TLR2 Cascade	12/365	95/10704	8.79182e-05	0.00427517	0.00370373	6196/4791/4792/8767/4790/1846/3656/7097/1848/4615/6288/57162	12
R-HSA-112409	RAF-independent MAPK1/3 activation	6/365	23/10704	9.30544e-05	0.00427517	0.00370373	3717/80824/1846/3569/1847/1848	6
R-HSA-75893	TNF signaling	8/365	44/10704	0.000102313	0.00427517	0.00370373	8837/330/7185/1540/8717/7128/6868/7124	8
R-HSA-168643	Nucleotide-binding domain, leucine rich repeat containing receptor (NLR) signaling pathways	9/365	56/10704	0.000103576	0.00427517	0.00370373	330/4791/1540/5027/8767/4790/24145/7128/3656	9
R-HSA-168179	Toll Like Receptor TLR1:TLR2 Cascade	12/365	98/10704	0.000119208	0.00427517	0.00370373	6196/4791/4792/8767/4790/1846/3656/7097/1848/4615/6288/57162	12
R-HSA-181438	Toll Like Receptor 2 (TLR2) Cascade	12/365	98/10704	0.000119208	0.00427517	0.00370373	6196/4791/4792/8767/4790/1846/3656/7097/1848/4615/6288/57162	12
R-HSA-5260271	Diseases of Immune System	6/365	24/10704	0.000120538	0.00427517	0.00370373	4791/4792/4790/7097/7098/4615	6
R-HSA-5602358	Diseases associated with the TLR signaling cascade	6/365	24/10704	0.000120538	0.00427517	0.00370373	4791/4792/4790/7097/7098/4615	6
R-HSA-933542	TRAF6 mediated NF-kB activation	6/365	24/10704	0.000120538	0.00427517	0.00370373	4791/4792/23586/4790/64135/6288	6
R-HSA-166016	Toll Like Receptor 4 (TLR4) Cascade	14/365	129/10704	0.000124499	0.00427517	0.00370373	330/6196/4791/4792/8767/4790/1846/3656/7097/1848/4615/6288/57162/9641	14
R-HSA-168142	Toll Like Receptor 10 (TLR10) Cascade	11/365	85/10704	0.000138325	0.00427517	0.00370373	6196/4791/4792/8767/4790/1846/3656/1848/4615/6288/57162	11
R-HSA-168176	Toll Like Receptor 5 (TLR5) Cascade	11/365	85/10704	0.000138325	0.00427517	0.00370373	6196/4791/4792/8767/4790/1846/3656/1848/4615/6288/57162	11
R-HSA-975871	MyD88 cascade initiated on plasma membrane	11/365	85/10704	0.000138325	0.00427517	0.00370373	6196/4791/4792/8767/4790/1846/3656/1848/4615/6288/57162	11
R-HSA-193639	p75NTR signals via NF-kB	5/365	16/10704	0.000143592	0.00427517	0.00370373	4792/8767/4790/8878/4615	5
R-HSA-111453	BH3-only proteins associate with and inactivate anti-apoptotic BCL-2 members	4/365	9/10704	0.00014627	0.00427517	0.00370373	90427/27113/5366/10018	4
R-HSA-5357905	Regulation of TNFR1 signaling	7/365	35/10704	0.000149028	0.00427517	0.00370373	8837/330/7185/1540/8717/7128/7124	7
R-HSA-1169408	ISG15 antiviral mechanism	10/365	72/10704	0.00015298	0.00427517	0.00370373	23586/6772/51191/9246/4599/7324/4600/11274/3434/9636	10
R-HSA-1810476	RIP-mediated NFkB activation via ZBP1	5/365	17/10704	0.000197766	0.00538133	0.00466203	4791/4792/4790/7098/4615	5
R-HSA-975138	TRAF6 mediated induction of NFkB and MAP kinases upon TLR7/8 or 9 activation	11/365	91/10704	0.000255675	0.00677868	0.0058726	6196/4791/4792/8767/4790/1846/3656/1848/4615/6288/57162	11
R-HSA-5676594	TNF receptor superfamily (TNFSF) members mediating non-canonical NF-kB pathway	5/365	18/10704	0.000266224	0.00688188	0.00596201	330/958/10673/4049/4050	5
R-HSA-975155	MyD88 dependent cascade initiated on endosome	11/365	92/10704	0.000281709	0.00710457	0.00615493	6196/4791/4792/8767/4790/1846/3656/1848/4615/6288/57162	11
R-HSA-168181	Toll Like Receptor 7/8 (TLR7/8) Cascade	11/365	93/10704	0.000309944	0.00763051	0.00661057	6196/4791/4792/8767/4790/1846/3656/1848/4615/6288/57162	11
R-HSA-1236977	Endosomal/Vacuolar pathway	4/365	11/10704	0.000362808	0.00822061	0.00712179	1520/3134/3105/3106	4
R-HSA-5213460	RIPK1-mediated regulated necrosis	6/365	29/10704	0.000368267	0.00822061	0.00712179	8837/330/8717/8743/197259/57162	6
R-HSA-5218859	Regulated Necrosis	6/365	29/10704	0.000368267	0.00822061	0.00712179	8837/330/8717/8743/197259/57162	6
R-HSA-5675482	Regulation of necroptotic cell death	6/365	29/10704	0.000368267	0.00822061	0.00712179	8837/330/8717/8743/197259/57162	6
R-HSA-8952158	RUNX3 regulates BCL2L11 (BIM) transcription	3/365	5/10704	0.000373664	0.00822061	0.00712179	864/10018/4088	3
R-HSA-983169	Class I MHC mediated antigen processing & presentation	26/365	370/10704	0.000381946	0.00822776	0.00712799	5685/7704/127544/55905/6737/7097/57520/55008/51191/6502/9246/1520/84541/6890/7324/80176/4615/57674/10193/5696/6891/3134/3105/3106/5698/115290	26
R-HSA-168138	Toll Like Receptor 9 (TLR9) Cascade	11/365	96/10704	0.000409341	0.00863793	0.00748333	6196/4791/4792/8767/4790/1846/3656/1848/4615/6288/57162	11
R-HSA-5357956	TNFR1-induced NFkappaB signaling pathway	6/365	30/10704	0.000447269	0.00924952	0.00801318	330/7185/1540/8717/7128/7124	6
R-HSA-1236975	Antigen processing-Cross presentation	11/365	98/10704	0.000489462	0.00990002	0.00857673	5685/7097/1520/6890/4615/5696/6891/3134/3105/3106/5698	11
R-HSA-1236974	ER-Phagosome pathway	10/365	83/10704	0.000497874	0.00990002	0.00857673	5685/7097/6890/4615/5696/6891/3134/3105/3106/5698	10
R-HSA-166166	MyD88-independent TLR4 cascade	11/365	99/10704	0.000534199	0.0102289	0.00886166	330/6196/4791/4792/8767/4790/1846/3656/1848/6288/9641	11
R-HSA-937061	TRIF(TICAM1)-mediated TLR4 signaling	11/365	99/10704	0.000534199	0.0102289	0.00886166	330/6196/4791/4792/8767/4790/1846/3656/1848/6288/9641	11
R-HSA-1606322	ZBP1(DAI) mediated induction of type I IFNs	5/365	21/10704	0.000581118	0.010925	0.00946472	4791/4792/4790/7098/4615	5
R-HSA-5668541	TNFR2 non-canonical NF-kB pathway	11/365	102/10704	0.00068939	0.0127291	0.0110276	330/5685/4791/958/10673/5971/5696/4049/4050/7124/5698	11
R-HSA-1362409	Mitochondrial iron-sulfur cluster biogenesis	4/365	13/10704	0.000744565	0.0130488	0.0113046	150274/51312/81894/51218	4
R-HSA-5357786	TNFR1-induced proapoptotic signaling	4/365	13/10704	0.000744565	0.0130488	0.0113046	1540/8717/7128/7124	4
R-HSA-75205	Dissolution of Fibrin Clot	4/365	13/10704	0.000744565	0.0130488	0.0113046	5329/5328/5270/5271	4
R-HSA-445989	TAK1 activates NFkB by phosphorylation and activation of IKKs complex	6/365	33/10704	0.000765336	0.0131893	0.0114263	4791/4792/8767/4790/3656/6288	6
R-HSA-198725	Nuclear Events (kinase and transcription factor activation)	8/365	61/10704	0.00102689	0.0174067	0.01508	6196/1846/3397/1848/6236/3726/10221/8061	8
R-HSA-3134963	DEx/H-box helicases activate type I IFN and inflammatory cytokines production	3/365	7/10704	0.00124257	0.020394	0.017668	4791/4790/4615	3
R-HSA-5603029	IkBA variant leads to EDA-ID	3/365	7/10704	0.00124257	0.020394	0.017668	4791/4792/4790	3
R-HSA-844456	The NLRP3 inflammasome	4/365	15/10704	0.00134653	0.0212482	0.018408	4791/5027/4790/24145	4
R-HSA-8854691	Interleukin-20 family signaling	5/365	25/10704	0.00135627	0.0212482	0.018408	3717/3718/6772/11009/6773	5
R-HSA-983170	Antigen Presentation: Folding, assembly and peptide loading of class I MHC	5/365	25/10704	0.00135627	0.0212482	0.018408	6890/6891/3134/3105/3106	5
R-HSA-3000170	Syndecan interactions	5/365	27/10704	0.0019487	0.030074	0.0260542	6382/3691/7057/2247/3673	5
R-HSA-9658195	Leishmania infection	18/365	252/10704	0.00248103	0.0377263	0.0326836	4791/5027/4790/5576/3552/3553/718/79924/79651/5025/4907/3569/4651/133/6868/11245/10458/4067	18
R-HSA-9662834	CD163 mediating an anti-inflammatory response	3/365	9/10704	0.00283389	0.0424672	0.0367908	79651/3569/6868	3
R-HSA-3000157	Laminin interactions	5/365	30/10704	0.00316361	0.046731	0.0404847	3918/4811/3691/3673/3914	5
R-HSA-351200	Interconversion of polyamines	2/365	3/10704	0.0034004	0.0495214	0.0429021	54498/6303	2
R-HSA-1980143	Signaling by NOTCH1	8/365	74/10704	0.00358335	0.0514608	0.0445823	9734/7089/3091/182/409/6868/92737/54492	8
R-HSA-2122948	Activated NOTCH1 Transmits Signal to the Nucleus	5/365	31/10704	0.00366836	0.0519601	0.0450148	182/409/6868/92737/54492	5
R-HSA-3000171	Non-integrin membrane-ECM interactions	7/365	59/10704	0.00375312	0.0524422	0.0454325	3918/6382/3691/7057/2247/3673/3914	7
R-HSA-622312	Inflammasomes	4/365	20/10704	0.00417679	0.057584	0.049887	4791/5027/4790/24145	4
R-HSA-2559585	Oncogene Induced Senescence	5/365	33/10704	0.00484675	0.0659412	0.0571271	1870/3397/2113/4343/2114	5
R-HSA-1059683	Interleukin-6 signaling	3/365	11/10704	0.00529071	0.0667145	0.0577971	3717/6772/3569	3
R-HSA-3371378	Regulation by c-FLIP	3/365	11/10704	0.00529071	0.0667145	0.0577971	8837/8717/8743	3
R-HSA-446107	Type I hemidesmosome assembly	3/365	11/10704	0.00529071	0.0667145	0.0577971	3918/3691/3914	3
R-HSA-4755510	SUMOylation of immune response proteins	3/365	11/10704	0.00529071	0.0667145	0.0577971	4791/4792/9641	3
R-HSA-5218900	CASP8 activity is inhibited	3/365	11/10704	0.00529071	0.0667145	0.0577971	8837/8717/8743	3
R-HSA-69416	Dimerization of procaspase-8	3/365	11/10704	0.00529071	0.0667145	0.0577971	8837/8717/8743	3
R-HSA-5357801	Programmed Cell Death	14/365	190/10704	0.00552291	0.0688035	0.0596068	8837/330/5685/1832/8717/90427/27113/8743/5366/10018/197259/57162/5696/5698	14
R-HSA-193704	p75 NTR receptor-mediated signalling	9/365	97/10704	0.0057532	0.0708192	0.061353	4792/8767/4790/5924/6868/10018/8878/55701/4615	9
R-HSA-9614085	FOXO-mediated transcription	7/365	65/10704	0.00643818	0.0783186	0.0678501	27113/6648/604/694/9314/10018/4088	7
R-HSA-140179	Amine Oxidase reactions	2/365	4/10704	0.00664746	0.0790054	0.0684451	54498/4128	2
R-HSA-2473224	Antagonism of Activin by Follistatin	2/365	4/10704	0.00664746	0.0790054	0.0684451	3624/10468	2
R-HSA-73621	Pyrimidine catabolism	3/365	12/10704	0.00687773	0.0799053	0.0692247	1890/51251/4907	3
R-HSA-8851680	Butyrophilin (BTN) family interactions	3/365	12/10704	0.00687773	0.0799053	0.0692247	11119/10384/7498	3
R-HSA-5607764	CLEC7A (Dectin-1) signaling	9/365	101/10704	0.00746921	0.085667	0.0742163	5685/4791/4792/5971/4790/3553/5530/5696/5698	9
R-HSA-2559583	Cellular Senescence	14/365	197/10704	0.00753936	0.085667	0.0742163	1870/6196/4683/4790/3552/3397/2113/3569/8091/4343/2114/3576/7324/84733	14
R-HSA-168638	NOD1/2 Signaling Pathway	5/365	37/10704	0.00796666	0.0885755	0.076736	330/1540/8767/7128/3656	5
R-HSA-8956319	Nucleobase catabolism	5/365	37/10704	0.00796666	0.0885755	0.076736	1890/22978/51251/4907/7498	5
R-HSA-449836	Other interleukin signaling	4/365	24/10704	0.00822901	0.0886333	0.0767861	9235/1440/6382/1435	4
R-HSA-6783589	Interleukin-6 family signaling	4/365	24/10704	0.00822901	0.0886333	0.0767861	3717/3977/6772/3569	4
R-HSA-982772	Growth hormone receptor signaling	4/365	24/10704	0.00822901	0.0886333	0.0767861	3717/6772/6868/4067	4
R-HSA-1502540	Signaling by Activin	3/365	13/10704	0.00871768	0.0901408	0.0780921	3624/10468/4088	3
R-HSA-1679131	Trafficking and processing of endosomal TLR	3/365	13/10704	0.00871768	0.0901408	0.0780921	5641/1520/7098	3
R-HSA-209543	p75NTR recruits signalling complexes	3/365	13/10704	0.00871768	0.0901408	0.0780921	8767/8878/4615	3
R-HSA-209560	NF-kB is activated and signals survival	3/365	13/10704	0.00871768	0.0901408	0.0780921	4792/4790/8878	3
R-HSA-5689896	Ovarian tumor domain proteases	5/365	38/10704	0.0089233	0.0905368	0.0784351	8767/23586/64135/7128/10318	5
R-HSA-375276	Peptide ligand-binding receptors	14/365	201/10704	0.00893109	0.0905368	0.0784351	6376/2920/6347/6364/6372/718/2921/6374/2919/3627/6373/3576/6288/6352	14
R-HSA-5621481	C-type lectin receptors (CLRs)	11/365	142/10704	0.00924278	0.0927868	0.0803843	5685/4791/4792/5971/4790/3553/5530/26253/5696/5698/4067	11
R-HSA-9031628	NGF-stimulated transcription	5/365	39/10704	0.0099564	0.0989896	0.0857581	3397/6236/3726/10221/8061	5
R-HSA-8856825	Cargo recognition for clathrin-mediated endocytosis	9/365	106/10704	0.0101343	0.0997983	0.0864587	7037/1839/84251/3949/950/409/1601/26119/3575	9
R-HSA-918233	TRAF3-dependent IRF activation pathway	3/365	14/10704	0.0108185	0.103169	0.0893788	23586/64135/9641	3
R-HSA-74713	IRS activation	2/365	5/10704	0.01083	0.103169	0.0893788	2887/3643	2
R-HSA-8964026	Chylomicron clearance	2/365	5/10704	0.01083	0.103169	0.0893788	3949/26119	2
R-HSA-180024	DARPP-32 events	4/365	26/10704	0.0109754	0.103169	0.0893788	5141/5576/5530/5142	4
R-HSA-912694	Regulation of IFNA signaling	4/365	26/10704	0.0109754	0.103169	0.0893788	6772/3455/6773/11274	4
R-HSA-1368108	BMAL1:CLOCK,NPAS2 activates circadian gene expression	4/365	27/10704	0.0125453	0.116863	0.101243	10135/79365/85441/8553	4
R-HSA-2691230	Signaling by NOTCH1 HD Domain Mutants in Cancer	3/365	15/10704	0.0131865	0.119026	0.103116	182/6868/54492	3
R-HSA-2691232	Constitutive Signaling by NOTCH1 HD Domain Mutants	3/365	15/10704	0.0131865	0.119026	0.103116	182/6868/54492	3
R-HSA-9648895	Response of EIF2AK1 (HRI) to heme deficiency	3/365	15/10704	0.0131865	0.119026	0.103116	23645/2887/467	3
R-HSA-6798695	Neutrophil degranulation	26/365	480/10704	0.0132379	0.119026	0.103116	5329/960/6793/5337/634/2683/1832/3614/4790/1075/25801/5328/7130/718/22918/7097/6993/101/1520/5806/2919/116844/25840/961/3105/3106	26
R-HSA-157118	Signaling by NOTCH	15/365	236/10704	0.0152442	0.135708	0.117569	5685/9734/7089/2683/3091/182/6772/409/6868/4343/4088/92737/5696/54492/5698	15
R-HSA-9614657	FOXO-mediated transcription of cell death genes	3/365	16/10704	0.0158263	0.135708	0.117569	27113/604/10018	3
R-HSA-173623	Classical antibody-mediated complement activation	2/365	6/10704	0.0158808	0.135708	0.117569	715/716	2
R-HSA-5660668	CLEC7A/inflammasome pathway	2/365	6/10704	0.0158808	0.135708	0.117569	4790/3553	2
R-HSA-8857538	PTK6 promotes HIF1A stabilization	2/365	6/10704	0.0158808	0.135708	0.117569	3091/1839	2
R-HSA-8964208	Phenylalanine metabolism	2/365	6/10704	0.0158808	0.135708	0.117569	259307/883	2
R-HSA-451927	Interleukin-2 family signaling	5/365	44/10704	0.0163617	0.138672	0.120136	3717/3718/6772/3601/3965	5
R-HSA-187037	Signaling by NTRK1 (TRKA)	9/365	115/10704	0.0166542	0.140004	0.12129	5898/6196/1846/3397/1848/6236/3726/10221/8061	9
R-HSA-114452	Activation of BH3-only proteins	4/365	30/10704	0.0180881	0.150832	0.130671	90427/27113/5366/10018	4
R-HSA-5689880	Ub-specific processing proteases	14/365	220/10704	0.0185163	0.152584	0.132189	330/5685/1540/3091/4792/23586/64135/9958/409/6502/4088/11274/5696/5698	14
R-HSA-140534	Caspase activation via Death Receptors in the presence of ligand	3/365	17/10704	0.018741	0.152584	0.132189	8837/8717/8743	3
R-HSA-9617828	FOXO-mediated transcription of cell cycle genes	3/365	17/10704	0.018741	0.152584	0.132189	694/9314/4088	3
R-HSA-983168	Antigen processing: Ubiquitination & Proteasome degradation	18/365	309/10704	0.0189455	0.153044	0.132587	5685/7704/127544/55905/6737/57520/55008/51191/6502/9246/84541/7324/80176/57674/10193/5696/5698/115290	18
R-HSA-1834949	Cytosolic sensors of pathogen-associated DNA	6/365	63/10704	0.0200119	0.160406	0.138965	4791/4792/4790/6737/7098/4615	6
R-HSA-450294	MAP kinase activation	6/365	64/10704	0.0214704	0.164052	0.142124	6196/8767/4790/1846/3656/1848	6
R-HSA-2660825	Signaling by NOTCH1 t(7;9)(NOTCH1:M1580_K2555) Translocation Mutant	2/365	7/10704	0.021736	0.164052	0.142124	182/6868	2
R-HSA-2660826	Constitutive Signaling by NOTCH1 t(7;9)(NOTCH1:M1580_K2555) Translocation Mutant	2/365	7/10704	0.021736	0.164052	0.142124	182/6868	2
R-HSA-426117	Cation-coupled Chloride cotransporters	2/365	7/10704	0.021736	0.164052	0.142124	6558/10723	2
R-HSA-8941855	RUNX3 regulates CDKN1A transcription	2/365	7/10704	0.021736	0.164052	0.142124	864/4088	2
R-HSA-9027277	Erythropoietin activates Phospholipase C gamma (PLCG)	2/365	7/10704	0.021736	0.164052	0.142124	3717/4067	2
R-HSA-9027283	Erythropoietin activates STAT5	2/365	7/10704	0.021736	0.164052	0.142124	3717/4067	2
R-HSA-9652817	Signaling by MAPK mutants	2/365	7/10704	0.021736	0.164052	0.142124	80824/1848	2
R-HSA-1168372	Downstream signaling events of B Cell Receptor (BCR)	7/365	83/10704	0.0228935	0.171395	0.148485	5685/4792/4790/5530/4794/5696/5698	7
R-HSA-9006936	Signaling by TGFB family members	8/365	102/10704	0.0230405	0.171395	0.148485	23645/3624/10468/9958/4091/50848/4088/3726	8
R-HSA-8964043	Plasma lipoprotein clearance	4/365	33/10704	0.0249458	0.184243	0.159616	3949/57552/7436/26119	4
R-HSA-74259	Purine catabolism	3/365	19/10704	0.0254012	0.184964	0.16024	22978/4907/7498	3
R-HSA-8964038	LDL clearance	3/365	19/10704	0.0254012	0.184964	0.16024	3949/57552/26119	3
R-HSA-216083	Integrin cell surface interactions	7/365	85/10704	0.0257061	0.184984	0.160258	960/3383/7057/50848/7412/3673/961	7
R-HSA-5688426	Deubiquitination	17/365	297/10704	0.0257617	0.184984	0.160258	330/5685/1540/3091/4792/8767/23586/64135/7128/9958/409/6502/10318/4088/11274/5696/5698	17
R-HSA-1169091	Activation of NF-kappaB in B cells	6/365	67/10704	0.0262723	0.187349	0.162306	5685/4792/4790/4794/5696/5698	6
R-HSA-8856828	Clathrin-mediated endocytosis	10/365	146/10704	0.0276726	0.195982	0.169786	7037/1839/84251/3949/950/409/1601/26119/29763/3575	10
R-HSA-75158	TRAIL signaling	2/365	8/10704	0.0283354	0.199312	0.17267	8837/8743	2
R-HSA-1474244	Extracellular matrix organization	17/365	301/10704	0.0288087	0.200918	0.174062	960/3918/634/3383/6382/4811/3691/7057/2247/101/6868/50848/7412/1520/3673/961/3914	17
R-HSA-9669938	Signaling by KIT in disease	3/365	20/10704	0.0291467	0.200918	0.174062	3717/6772/4067	3
R-HSA-9670439	Signaling by phosphorylated juxtamembrane, extracellular and kinase domain KIT mutants	3/365	20/10704	0.0291467	0.200918	0.174062	3717/6772/4067	3
R-HSA-174824	Plasma lipoprotein assembly, remodeling, and clearance	6/365	70/10704	0.0317389	0.217338	0.188287	9388/3949/57552/7436/26119/19	6
R-HSA-5621575	CD209 (DC-SIGN) signaling	3/365	21/10704	0.0331673	0.217647	0.188555	5971/4790/4067	3
R-HSA-3560792	Defective SLC26A2 causes chondrodysplasias	1/365	1/10704	0.0340994	0.217647	0.188555	1836	1
R-HSA-4793953	Defective B4GALT1 causes B4GALT1-CDG (CDG-2d)	1/365	1/10704	0.0340994	0.217647	0.188555	2683	1
R-HSA-5579012	Defective MAOA causes Brunner syndrome (BRUNS)	1/365	1/10704	0.0340994	0.217647	0.188555	4128	1
R-HSA-5602410	TLR3 deficiency - HSE	1/365	1/10704	0.0340994	0.217647	0.188555	7098	1
R-HSA-5619048	Defective SLC11A2 causes hypochromic microcytic anemia, with iron overload 1 (AHMIO1)	1/365	1/10704	0.0340994	0.217647	0.188555	4891	1
R-HSA-5683678	Defective ABCA3 causes SMDP3	1/365	1/10704	0.0340994	0.217647	0.188555	21	1
R-HSA-5688399	Defective ABCA3 causes SMDP3	1/365	1/10704	0.0340994	0.217647	0.188555	21	1
R-HSA-9616333	Defective Base Excision Repair Associated with NTHL1	1/365	1/10704	0.0340994	0.217647	0.188555	4913	1
R-HSA-9630221	Defective NTHL1 substrate processing	1/365	1/10704	0.0340994	0.217647	0.188555	4913	1
R-HSA-9630222	Defective NTHL1 substrate binding	1/365	1/10704	0.0340994	0.217647	0.188555	4913	1
R-HSA-446728	Cell junction organization	7/365	91/10704	0.0355364	0.220183	0.190752	3918/55679/3691/50848/23562/9076/3914	7
R-HSA-112411	MAPK1 (ERK2) activation	2/365	9/10704	0.0356215	0.220183	0.190752	3717/3569	2
R-HSA-8985947	Interleukin-9 signaling	2/365	9/10704	0.0356215	0.220183	0.190752	3718/6772	2
R-HSA-9020933	Interleukin-23 signaling	2/365	9/10704	0.0356215	0.220183	0.190752	3717/51561	2
R-HSA-448424	Interleukin-17 signaling	6/365	72/10704	0.0357665	0.220183	0.190752	6196/8767/4790/1846/3656/1848	6
R-HSA-5173105	O-linked glycosylation	8/365	111/10704	0.0357744	0.220183	0.190752	11174/117248/55901/7057/9334/55568/11041/84002	8
R-HSA-983705	Signaling by the B Cell Receptor (BCR)	8/365	112/10704	0.0374331	0.227849	0.197393	5685/4792/4790/5530/4794/5696/5698/4067	8
R-HSA-198753	ERK/MAPK targets	3/365	22/10704	0.0374606	0.227849	0.197393	6196/1846/1848	3
R-HSA-166520	Signaling by NTRKs	9/365	134/10704	0.0396561	0.239792	0.20774	5898/6196/1846/3397/1848/6236/3726/10221/8061	9
R-HSA-109581	Apoptosis	11/365	178/10704	0.0412721	0.248112	0.214948	8837/5685/1832/8717/90427/27113/8743/5366/10018/5696/5698	11
R-HSA-166663	Initial triggering of complement	3/365	23/10704	0.0420232	0.251167	0.217595	718/715/716	3
R-HSA-8853884	Transcriptional Regulation by VENTX	4/365	39/10704	0.0428174	0.251512	0.217893	4790/3569/4343/7324	4
R-HSA-110056	MAPK3 (ERK1) activation	2/365	10/10704	0.0435402	0.251512	0.217893	3717/3569	2
R-HSA-419812	Calcitonin-like ligand receptors	2/365	10/10704	0.0435402	0.251512	0.217893	79924/133	2
R-HSA-5602498	MyD88 deficiency (TLR2/4)	2/365	10/10704	0.0435402	0.251512	0.217893	7097/4615	2
R-HSA-74749	Signal attenuation	2/365	10/10704	0.0435402	0.251512	0.217893	2887/3643	2
R-HSA-9020958	Interleukin-21 signaling	2/365	10/10704	0.0435402	0.251512	0.217893	3718/6772	2
R-HSA-447115	Interleukin-12 family signaling	5/365	57/10704	0.0442254	0.25405	0.220093	5898/3717/51561/6648/6772	5
R-HSA-202733	Cell surface interactions at the vascular wall	9/365	137/10704	0.0446342	0.254982	0.2209	6401/960/634/285/2888/6382/50848/961/4067	9
R-HSA-8878159	Transcriptional regulation by RUNX3	7/365	96/10704	0.0454148	0.258016	0.223528	864/5685/182/10018/4088/5696/5698	7
R-HSA-452723	Transcriptional regulation of pluripotent stem cells	3/365	24/10704	0.0468509	0.26472	0.229336	64344/9314/2247	3
R-HSA-351202	Metabolism of polyamines	5/365	59/10704	0.0500891	0.278806	0.241539	5685/54498/6303/5696/5698	5
R-HSA-5676590	NIK-->noncanonical NF-kB signaling	5/365	59/10704	0.0500891	0.278806	0.241539	5685/4791/5971/5696/5698	5
R-HSA-1234158	Regulation of gene expression by Hypoxia-inducible Factor	2/365	11/10704	0.0520401	0.278806	0.241539	3091/64344	2
R-HSA-1839122	Signaling by activated point mutants of FGFR1	2/365	11/10704	0.0520401	0.278806	0.241539	2250/2247	2
R-HSA-193692	Regulated proteolysis of p75NTR	2/365	11/10704	0.0520401	0.278806	0.241539	4790/6868	2
R-HSA-196025	Formation of annular gap junctions	2/365	11/10704	0.0520401	0.278806	0.241539	2697/1601	2
R-HSA-5603041	IRAK4 deficiency (TLR2/4)	2/365	11/10704	0.0520401	0.278806	0.241539	7097/4615	2
R-HSA-5661231	Metallothioneins bind metals	2/365	11/10704	0.0520401	0.278806	0.241539	4502/4493	2
R-HSA-8963691	Phenylalanine and tyrosine metabolism	2/365	11/10704	0.0520401	0.278806	0.241539	259307/883	2
R-HSA-9020956	Interleukin-27 signaling	2/365	11/10704	0.0520401	0.278806	0.241539	3717/6772	2
R-HSA-5607761	Dectin-1 mediated noncanonical NF-kB signaling	5/365	60/10704	0.0531841	0.283466	0.245576	5685/4791/5971/5696/5698	5
R-HSA-15869	Metabolism of nucleotides	7/365	101/10704	0.056903	0.301732	0.2614	1890/22978/3614/51251/4907/2766/7498	7
R-HSA-2173788	Downregulation of TGF-beta receptor signaling	3/365	26/10704	0.0572821	0.302192	0.261799	23645/9958/4088	3
R-HSA-1433557	Signaling by SCF-KIT	4/365	43/10704	0.0578667	0.302193	0.2618	3717/2887/6772/4067	4
R-HSA-5675221	Negative regulation of MAPK pathway	4/365	43/10704	0.0578667	0.302193	0.2618	80824/1846/1847/1848	4
R-HSA-2871837	FCERI mediated NF-kB activation	6/365	82/10704	0.0607224	0.303601	0.26302	5685/4792/4790/5696/5698/4067	6
R-HSA-1475029	Reversible hydration of carbon dioxide	2/365	12/10704	0.0610726	0.303601	0.26302	771/760	2
R-HSA-1839130	Signaling by activated point mutants of FGFR3	2/365	12/10704	0.0610726	0.303601	0.26302	2250/2247	2
R-HSA-190373	FGFR1c ligand binding and activation	2/365	12/10704	0.0610726	0.303601	0.26302	2250/2247	2
R-HSA-190873	Gap junction degradation	2/365	12/10704	0.0610726	0.303601	0.26302	2697/1601	2
R-HSA-2033514	FGFR3 mutant receptor activation	2/365	12/10704	0.0610726	0.303601	0.26302	2250/2247	2
R-HSA-8984722	Interleukin-35 Signalling	2/365	12/10704	0.0610726	0.303601	0.26302	3717/6772	2
R-HSA-9013973	TICAM1-dependent activation of IRF3/IRF7	2/365	12/10704	0.0610726	0.303601	0.26302	7098/9641	2
R-HSA-9027276	Erythropoietin activates Phosphoinositide-3-kinase (PI3K)	2/365	12/10704	0.0610726	0.303601	0.26302	3717/4067	2
R-HSA-933543	NF-kB activation through FADD/RIP-1 pathway mediated by caspase-8 and -10	2/365	12/10704	0.0610726	0.303601	0.26302	23586/64135	2
R-HSA-380994	ATF4 activates genes in response to endoplasmic reticulum stress	3/365	27/10704	0.0628742	0.306719	0.265721	6347/467/3576	3
R-HSA-5357769	Caspase activation via extrinsic apoptotic signalling pathway	3/365	27/10704	0.0628742	0.306719	0.265721	8837/8717/8743	3
R-HSA-9635486	Infection with Mycobacterium tuberculosis	3/365	27/10704	0.0628742	0.306719	0.265721	80824/7097/57674	3
R-HSA-5684996	MAPK1/MAPK3 signaling	15/365	286/10704	0.0651067	0.306719	0.265721	5685/3717/3718/80824/1839/5924/1846/3569/1847/2250/2247/1848/409/5696/5698	15
R-HSA-6802957	Oncogenic MAPK signaling	6/365	84/10704	0.0667007	0.306719	0.265721	3717/56829/80824/1848/409/10018	6
R-HSA-141333	Biogenic amines are oxidatively deaminated to aldehydes by MAOA and MAOB	1/365	2/10704	0.0670391	0.306719	0.265721	4128	1
R-HSA-141334	PAOs oxidise polyamines to amines	1/365	2/10704	0.0670391	0.306719	0.265721	54498	1
R-HSA-1483152	Hydrolysis of LPE	1/365	2/10704	0.0670391	0.306719	0.265721	8605	1
R-HSA-379398	Enzymatic degradation of Dopamine by monoamine oxidase	1/365	2/10704	0.0670391	0.306719	0.265721	4128	1
R-HSA-380612	Metabolism of serotonin	1/365	2/10704	0.0670391	0.306719	0.265721	4128	1
R-HSA-5083627	Defective LARGE causes MDDGA6 and MDDGB6	1/365	2/10704	0.0670391	0.306719	0.265721	11041	1
R-HSA-5602415	UNC93B1 deficiency - HSE	1/365	2/10704	0.0670391	0.306719	0.265721	7098	1
R-HSA-5602566	TICAM1 deficiency - HSE	1/365	2/10704	0.0670391	0.306719	0.265721	7098	1
R-HSA-5602680	MyD88 deficiency (TLR5)	1/365	2/10704	0.0670391	0.306719	0.265721	4615	1
R-HSA-5682113	Defective ABCA1 causes TGD	1/365	2/10704	0.0670391	0.306719	0.265721	19	1
R-HSA-8854521	Interaction between PHLDA1 and AURKA	1/365	2/10704	0.0670391	0.306719	0.265721	22822	1
R-HSA-8951911	RUNX3 regulates RUNX1-mediated transcription	1/365	2/10704	0.0670391	0.306719	0.265721	864	1
R-HSA-9636569	Suppression of autophagy	1/365	2/10704	0.0670391	0.306719	0.265721	80824	1
R-HSA-2022854	Keratan sulfate biosynthesis	3/365	28/10704	0.0687089	0.31229	0.270547	2683/9334/11041	3
R-HSA-190239	FGFR3 ligand binding and activation	2/365	13/10704	0.0705917	0.31229	0.270547	2250/2247	2
R-HSA-190372	FGFR3c ligand binding and activation	2/365	13/10704	0.0705917	0.31229	0.270547	2250/2247	2
R-HSA-190375	FGFR2c ligand binding and activation	2/365	13/10704	0.0705917	0.31229	0.270547	2250/2247	2
R-HSA-202670	ERKs are inactivated	2/365	13/10704	0.0705917	0.31229	0.270547	1846/1848	2
R-HSA-5654227	Phospholipase C-mediated cascade; FGFR3	2/365	13/10704	0.0705917	0.31229	0.270547	2250/2247	2
R-HSA-5658623	FGFRL1 modulation of FGFR1 signaling	2/365	13/10704	0.0705917	0.31229	0.270547	2250/2247	2
R-HSA-5663202	Diseases of signal transduction by growth factor receptors and second messengers	19/365	387/10704	0.0706729	0.31229	0.270547	5685/9734/3717/182/56829/80824/1839/6772/2250/2247/1848/409/6868/10018/4088/5696/54492/5698/4067	19
R-HSA-1500931	Cell-Cell communication	8/365	129/10704	0.0737635	0.323411	0.280182	3918/55679/3691/50848/23562/9076/961/3914	8
R-HSA-1234176	Oxygen-dependent proline hydroxylation of Hypoxia-inducible Factor Alpha	5/365	66/10704	0.074035	0.323411	0.280182	5685/3091/64344/5696/5698	5
R-HSA-420029	Tight junction interactions	3/365	29/10704	0.0747794	0.323411	0.280182	50848/23562/9076	3
R-HSA-933541	TRAF6 mediated IRF7 activation	3/365	29/10704	0.0747794	0.323411	0.280182	23586/64135/9641	3
R-HSA-9645723	Diseases of programmed cell death	3/365	29/10704	0.0747794	0.323411	0.280182	8717/6648/10018	3
R-HSA-69231	Cyclin D associated events in G1	4/365	47/10704	0.0753791	0.323411	0.280182	1870/3717/6502/4067	4
R-HSA-69236	G1 Phase	4/365	47/10704	0.0753791	0.323411	0.280182	1870/3717/6502/4067	4
R-HSA-166786	Creation of C4 and C2 activators	2/365	14/10704	0.0805539	0.334004	0.289359	715/716	2
R-HSA-399955	SEMA3A-Plexin repulsion signaling by inhibiting Integrin adhesion	2/365	14/10704	0.0805539	0.334004	0.289359	10371/27289	2
R-HSA-5660526	Response to metal ions	2/365	14/10704	0.0805539	0.334004	0.289359	4502/4493	2
R-HSA-877312	Regulation of IFNG signaling	2/365	14/10704	0.0805539	0.334004	0.289359	3717/6772	2
R-HSA-8941856	RUNX3 regulates NOTCH signaling	2/365	14/10704	0.0805539	0.334004	0.289359	864/182	2
R-HSA-8983432	Interleukin-15 signaling	2/365	14/10704	0.0805539	0.334004	0.289359	3718/3601	2
R-HSA-9027284	Erythropoietin activates RAS	2/365	14/10704	0.0805539	0.334004	0.289359	3717/4067	2
R-HSA-1482839	Acyl chain remodelling of PE	3/365	30/10704	0.0810784	0.334004	0.289359	8605/5920/22925	3
R-HSA-3928663	EPHA-mediated growth cone collapse	3/365	30/10704	0.0810784	0.334004	0.289359	10398/1942/4067	3
R-HSA-8874081	MET activates PTK2 signaling	3/365	30/10704	0.0810784	0.334004	0.289359	3918/3673/3914	3
R-HSA-198933	Immunoregulatory interactions between a Lymphoid and a non-Lymphoid cell	8/365	132/10704	0.0818271	0.334495	0.289784	29121/3383/958/718/7412/3134/3105/3106	8
R-HSA-68867	Assembly of the pre-replicative complex	5/365	68/10704	0.0818445	0.334495	0.289784	1870/5685/4175/5696/5698	5
R-HSA-1839124	FGFR1 mutant receptor activation	3/365	31/10704	0.0875985	0.353816	0.306523	6772/2250/2247	3
R-HSA-196807	Nicotinate metabolism	3/365	31/10704	0.0875985	0.353816	0.306523	10135/4907/54625	3
R-HSA-450282	MAPK targets/ Nuclear events mediated by MAP kinases	3/365	31/10704	0.0875985	0.353816	0.306523	6196/1846/1848	3
R-HSA-5683057	MAPK family signaling cascades	16/365	325/10704	0.0900293	0.358814	0.310853	5685/3717/3718/80824/1839/5924/1846/3569/1847/2250/2247/1848/409/4343/5696/5698	16
R-HSA-400253	Circadian Clock	5/365	70/10704	0.0900741	0.358814	0.310853	3091/10135/79365/85441/8553	5
R-HSA-69052	Switching of origins to a post-replicative state	6/365	91/10704	0.090224	0.358814	0.310853	5685/4175/6502/7324/5696/5698	6
R-HSA-2214320	Anchoring fibril formation	2/365	15/10704	0.0909181	0.358814	0.310853	3918/3914	2
R-HSA-75892	Platelet Adhesion to exposed collagen	2/365	15/10704	0.0909181	0.358814	0.310853	3673/4067	2
R-HSA-975577	N-Glycan antennae elongation	2/365	15/10704	0.0909181	0.358814	0.310853	2683/9334	2
R-HSA-1251985	Nuclear signaling by ERBB4	3/365	32/10704	0.0943318	0.363326	0.314762	1839/10608/6868	3
R-HSA-2173789	TGF-beta receptor signaling activates SMADs	3/365	32/10704	0.0943318	0.363326	0.314762	23645/9958/4088	3
R-HSA-381042	PERK regulates gene expression	3/365	32/10704	0.0943318	0.363326	0.314762	6347/467/3576	3
R-HSA-68949	Orc1 removal from chromatin	5/365	71/10704	0.0943438	0.363326	0.314762	5685/4175/6502/5696/5698	5
R-HSA-5673001	RAF/MAP kinase cascade	14/365	280/10704	0.0982081	0.363326	0.314762	5685/3717/3718/80824/1839/5924/1846/1847/2250/2247/1848/409/5696/5698	14
R-HSA-111446	Activation of BIM and translocation to mitochondria	1/365	3/10704	0.0988585	0.363326	0.314762	10018	1
R-HSA-139910	Activation of BMF and translocation to mitochondria	1/365	3/10704	0.0988585	0.363326	0.314762	90427	1
R-HSA-190704	Oligomerization of connexins into connexons	1/365	3/10704	0.0988585	0.363326	0.314762	2697	1
R-HSA-190827	Transport of connexins along the secretory pathway	1/365	3/10704	0.0988585	0.363326	0.314762	2697	1
R-HSA-191650	Regulation of gap junction activity	1/365	3/10704	0.0988585	0.363326	0.314762	2697	1
R-HSA-3304347	Loss of Function of SMAD4 in Cancer	1/365	3/10704	0.0988585	0.363326	0.314762	4088	1
R-HSA-3311021	SMAD4 MH2 Domain Mutants in Cancer	1/365	3/10704	0.0988585	0.363326	0.314762	4088	1
R-HSA-3315487	SMAD2/3 MH2 Domain Mutants in Cancer	1/365	3/10704	0.0988585	0.363326	0.314762	4088	1
R-HSA-350864	Regulation of thyroid hormone activity	1/365	3/10704	0.0988585	0.363326	0.314762	1734	1
R-HSA-379397	Enzymatic degradation of dopamine by COMT	1/365	3/10704	0.0988585	0.363326	0.314762	4128	1
R-HSA-380615	Serotonin clearance from the synaptic cleft	1/365	3/10704	0.0988585	0.363326	0.314762	4128	1
R-HSA-5602571	TRAF3 deficiency - HSE	1/365	3/10704	0.0988585	0.363326	0.314762	7098	1
R-HSA-5653890	Lactose synthesis	1/365	3/10704	0.0988585	0.363326	0.314762	2683	1
R-HSA-8981607	Intracellular oxygen transport	1/365	3/10704	0.0988585	0.363326	0.314762	114757	1
R-HSA-418594	G alpha (i) signalling events	19/365	405/10704	0.0990889	0.363326	0.314762	6376/5141/2920/5576/6364/6382/6372/718/3949/5530/2921/6374/2919/3627/6373/3576/6288/5142/6352	19
R-HSA-139853	Elevation of cytosolic Ca2+ levels	2/365	16/10704	0.101645	0.367488	0.318367	5027/5025	2
R-HSA-190242	FGFR1 ligand binding and activation	2/365	16/10704	0.101645	0.367488	0.318367	2250/2247	2
R-HSA-399956	CRMPs in Sema3A signaling	2/365	16/10704	0.101645	0.367488	0.318367	10371/1809	2
R-HSA-5654219	Phospholipase C-mediated cascade: FGFR1	2/365	16/10704	0.101645	0.367488	0.318367	2250/2247	2
R-HSA-170834	Signaling by TGF-beta Receptor Complex	5/365	73/10704	0.103187	0.370471	0.320951	23645/9958/50848/4088/3726	5
R-HSA-8939902	Regulation of RUNX2 expression and activity	5/365	73/10704	0.103187	0.370471	0.320951	5685/6772/6502/5696/5698	5
R-HSA-109606	Intrinsic Pathway for Apoptosis	4/365	53/10704	0.106011	0.379293	0.328594	90427/27113/5366/10018	4
R-HSA-174178	APC/C:Cdh1 mediated degradation of Cdc20 and other APC/C:Cdh1 targeted proteins in late mitosis/early G1	5/365	74/10704	0.107758	0.384213	0.332857	5685/6502/7324/5696/5698	5
R-HSA-1638074	Keratan sulfate/keratin metabolism	3/365	34/10704	0.108406	0.385195	0.333708	2683/9334/11041	3
R-HSA-180585	Vif-mediated degradation of APOBEC3G	4/365	54/10704	0.111593	0.388437	0.336517	5685/5696/60489/5698	4
R-HSA-74751	Insulin receptor signalling cascade	4/365	54/10704	0.111593	0.388437	0.336517	2887/2250/2247/3643	4
R-HSA-1234174	Cellular response to hypoxia	5/365	75/10704	0.112426	0.388437	0.336517	5685/3091/64344/5696/5698	5
R-HSA-1482922	Acyl chain remodelling of PI	2/365	17/10704	0.112699	0.388437	0.336517	8605/22925	2
R-HSA-196757	Metabolism of folate and pterines	2/365	17/10704	0.112699	0.388437	0.336517	441024/6573	2
R-HSA-2033519	Activated point mutants of FGFR2	2/365	17/10704	0.112699	0.388437	0.336517	2250/2247	2
R-HSA-450385	Butyrate Response Factor 1 (BRF1) binds and destabilizes mRNA	2/365	17/10704	0.112699	0.388437	0.336517	54464/677	2
R-HSA-6788467	IL-6-type cytokine receptor ligand interactions	2/365	17/10704	0.112699	0.388437	0.336517	3717/3977	2
R-HSA-8934593	Regulation of RUNX1 Expression and Activity	2/365	17/10704	0.112699	0.388437	0.336517	5371/4343	2
R-HSA-1655829	Regulation of cholesterol biosynthesis by SREBP (SREBF)	4/365	55/10704	0.117303	0.401599	0.347919	3157/85441/4047/3638	4
R-HSA-8941858	Regulation of RUNX3 expression and activity	4/365	55/10704	0.117303	0.401599	0.347919	864/5685/5696/5698	4
R-HSA-202424	Downstream TCR signaling	6/365	98/10704	0.117683	0.401599	0.347919	5685/4792/8767/4790/5696/5698	6
R-HSA-5619084	ABC transporter disorders	5/365	77/10704	0.12205	0.412421	0.357294	5685/19/21/5696/5698	5
R-HSA-9675126	Diseases of mitotic cell cycle	3/365	36/10704	0.123235	0.412421	0.357294	1870/6502/7324	3
R-HSA-9687139	Aberrant regulation of mitotic cell cycle due to RB1 defects	3/365	36/10704	0.123235	0.412421	0.357294	1870/6502/7324	3
R-HSA-210993	Tie2 Signaling	2/365	18/10704	0.124045	0.412421	0.357294	285/2888	2
R-HSA-5654221	Phospholipase C-mediated cascade; FGFR2	2/365	18/10704	0.124045	0.412421	0.357294	2250/2247	2
R-HSA-5654704	SHC-mediated cascade:FGFR3	2/365	18/10704	0.124045	0.412421	0.357294	2250/2247	2
R-HSA-5654710	PI-3K cascade:FGFR3	2/365	18/10704	0.124045	0.412421	0.357294	2250/2247	2
R-HSA-881907	Gastrin-CREB signalling pathway via PKC and MAPK	2/365	18/10704	0.124045	0.412421	0.357294	6196/1839	2
R-HSA-74752	Signaling by Insulin receptor	5/365	78/10704	0.127001	0.420895	0.364635	2887/2250/2247/3643/155066	5
R-HSA-379401	Dopamine clearance from the synaptic cleft	1/365	4/10704	0.129595	0.422718	0.366215	4128	1
R-HSA-427975	Proton/oligopeptide cotransporters	1/365	4/10704	0.129595	0.422718	0.366215	51296	1
R-HSA-5603037	IRAK4 deficiency (TLR5)	1/365	4/10704	0.129595	0.422718	0.366215	4615	1
R-HSA-8849474	PTK6 Activates STAT3	1/365	4/10704	0.129595	0.422718	0.366215	55620	1
R-HSA-9686347	Microbial modulation of RIPK1-mediated regulated necrosis	1/365	4/10704	0.129595	0.422718	0.366215	197259	1
R-HSA-9607240	FLT3 Signaling	14/365	294/10704	0.130499	0.423272	0.366695	5685/3717/3718/80824/1839/5924/1846/1847/2250/2247/1848/409/5696/5698	14
R-HSA-5083635	Defective B3GALTL causes Peters-plus syndrome (PpS)	3/365	37/10704	0.130912	0.423272	0.366695	11174/55901/7057	3
R-HSA-1630316	Glycosaminoglycan metabolism	7/365	124/10704	0.130993	0.423272	0.366695	960/2683/29940/6382/1836/9334/11041	7
R-HSA-2644602	Signaling by NOTCH1 PEST Domain Mutants in Cancer	4/365	58/10704	0.135166	0.430035	0.372554	9734/182/6868/54492	4
R-HSA-2644603	Signaling by NOTCH1 in Cancer	4/365	58/10704	0.135166	0.430035	0.372554	9734/182/6868/54492	4
R-HSA-2644606	Constitutive Signaling by NOTCH1 PEST Domain Mutants	4/365	58/10704	0.135166	0.430035	0.372554	9734/182/6868/54492	4
R-HSA-2894858	Signaling by NOTCH1 HD+PEST Domain Mutants in Cancer	4/365	58/10704	0.135166	0.430035	0.372554	9734/182/6868/54492	4
R-HSA-2894862	Constitutive Signaling by NOTCH1 HD+PEST Domain Mutants	4/365	58/10704	0.135166	0.430035	0.372554	9734/182/6868/54492	4
R-HSA-197264	Nicotinamide salvaging	2/365	19/10704	0.13565	0.430253	0.372743	10135/54625	2
R-HSA-453279	Mitotic G1 phase and G1/S transition	8/365	149/10704	0.136856	0.432749	0.374905	1870/5685/4175/3717/6502/5696/5698/4067	8
R-HSA-5173214	O-glycosylation of TSR domain-containing proteins	3/365	38/10704	0.138752	0.436077	0.377788	11174/55901/7057	3
R-HSA-5655302	Signaling by FGFR1 in disease	3/365	38/10704	0.138752	0.436077	0.377788	6772/2250/2247	3
R-HSA-6811558	PI5P, PP2A and IER3 Regulate PI3K/AKT Signaling	6/365	103/10704	0.139567	0.437309	0.378856	1839/8870/2250/2247/3643/4615	6
R-HSA-9679191	Potential therapeutics for SARS	5/365	81/10704	0.142393	0.444816	0.385359	3717/3718/3614/3455/6773	5
R-HSA-69306	DNA Replication	7/365	128/10704	0.147292	0.450494	0.390279	1870/5685/4175/6502/7324/5696/5698	7
R-HSA-168927	TICAM1, RIP1-mediated IKK complex recruitment	2/365	20/10704	0.147484	0.450494	0.390279	330/7098	2
R-HSA-190241	FGFR2 ligand binding and activation	2/365	20/10704	0.147484	0.450494	0.390279	2250/2247	2
R-HSA-5654706	FRS-mediated FGFR3 signaling	2/365	20/10704	0.147484	0.450494	0.390279	2250/2247	2
R-HSA-6803204	TP53 Regulates Transcription of Genes Involved in Cytochrome C Release	2/365	20/10704	0.147484	0.450494	0.390279	27113/5366	2
R-HSA-9687136	Aberrant regulation of mitotic exit in cancer due to RB1 defects	2/365	20/10704	0.147484	0.450494	0.390279	6502/7324	2
R-HSA-187577	SCF(Skp2)-mediated degradation of p27/p21	4/365	60/10704	0.147651	0.450494	0.390279	5685/6502/5696/5698	4
R-HSA-9013694	Signaling by NOTCH4	5/365	82/10704	0.147696	0.450494	0.390279	5685/182/4088/5696/5698	5
R-HSA-2022090	Assembly of collagen fibrils and other multimeric structures	4/365	61/10704	0.154055	0.45817	0.396928	3918/3691/1520/3914	4
R-HSA-1483166	Synthesis of PA	3/365	40/10704	0.154887	0.45817	0.396928	5337/23171/22925	3
R-HSA-445355	Smooth Muscle Contraction	3/365	40/10704	0.154887	0.45817	0.396928	4638/10580/10398	3
R-HSA-381340	Transcriptional regulation of white adipocyte differentiation	5/365	84/10704	0.158549	0.45817	0.396928	4790/85441/9314/1052/7124	5
R-HSA-111448	Activation of NOXA and translocation to mitochondria	1/365	5/10704	0.159287	0.45817	0.396928	5366	1
R-HSA-112303	Electric Transmission Across Gap Junctions	1/365	5/10704	0.159287	0.45817	0.396928	24145	1
R-HSA-112307	Transmission across Electrical Synapses	1/365	5/10704	0.159287	0.45817	0.396928	24145	1
R-HSA-173736	Alternative complement activation	1/365	5/10704	0.159287	0.45817	0.396928	718	1
R-HSA-180689	APOBEC3G mediated resistance to HIV-1 infection	1/365	5/10704	0.159287	0.45817	0.396928	60489	1
R-HSA-2161541	Abacavir metabolism	1/365	5/10704	0.159287	0.45817	0.396928	22978	1
R-HSA-5690714	CD22 mediated BCR regulation	1/365	5/10704	0.159287	0.45817	0.396928	4067	1
R-HSA-8849473	PTK6 Expression	1/365	5/10704	0.159287	0.45817	0.396928	3091	1
R-HSA-8866376	Reelin signalling pathway	1/365	5/10704	0.159287	0.45817	0.396928	7436	1
R-HSA-8939247	RUNX1 regulates transcription of genes involved in interleukin signaling	1/365	5/10704	0.159287	0.45817	0.396928	3977	1
R-HSA-9605308	Diseases of Base Excision Repair	1/365	5/10704	0.159287	0.45817	0.396928	4913	1
R-HSA-9693928	Defective RIPK1-mediated regulated necrosis	1/365	5/10704	0.159287	0.45817	0.396928	8717	1
R-HSA-189200	Cellular hexose transport	2/365	21/10704	0.159518	0.45817	0.396928	66035/11182	2
R-HSA-416572	Sema4D induced cell migration and growth-cone collapse	2/365	21/10704	0.159518	0.45817	0.396928	10398/27289	2
R-HSA-5654688	SHC-mediated cascade:FGFR1	2/365	21/10704	0.159518	0.45817	0.396928	2250/2247	2
R-HSA-5654689	PI-3K cascade:FGFR1	2/365	21/10704	0.159518	0.45817	0.396928	2250/2247	2
R-HSA-9008059	Interleukin-37 signaling	2/365	21/10704	0.159518	0.45817	0.396928	10068/4088	2
R-HSA-3560782	Diseases associated with glycosaminoglycan metabolism	3/365	41/10704	0.163165	0.46485	0.402715	2683/6382/1836	3
R-HSA-8875878	MET promotes cell motility	3/365	41/10704	0.163165	0.46485	0.402715	3918/3673/3914	3
R-HSA-425393	Transport of inorganic cations/anions and amino acids/oligopeptides	6/365	108/10704	0.163192	0.46485	0.402715	6542/92745/6558/51296/10723/1836	6
R-HSA-5632684	Hedgehog 'on' state	5/365	85/10704	0.164095	0.464862	0.402726	5685/409/64399/5696/5698	5
R-HSA-69002	DNA Replication Pre-Initiation	5/365	85/10704	0.164095	0.464862	0.402726	1870/5685/4175/5696/5698	5
R-HSA-913709	O-linked glycosylation of mucins	4/365	63/10704	0.167169	0.472275	0.409148	117248/9334/55568/84002	4
R-HSA-2173782	Binding and Uptake of Ligands by Scavenger Receptors	3/365	42/10704	0.171572	0.476037	0.412407	8578/8542/6288	3
R-HSA-2426168	Activation of gene expression by SREBF (SREBP)	3/365	42/10704	0.171572	0.476037	0.412407	3157/85441/4047	3
R-HSA-2979096	NOTCH2 Activation and Transmission of Signal to the Nucleus	2/365	22/10704	0.171723	0.476037	0.412407	182/54492	2
R-HSA-5655332	Signaling by FGFR3 in disease	2/365	22/10704	0.171723	0.476037	0.412407	2250/2247	2
R-HSA-8853338	Signaling by FGFR3 point mutants in cancer	2/365	22/10704	0.171723	0.476037	0.412407	2250/2247	2
R-HSA-8862803	Deregulated CDK5 triggers multiple neurodegenerative pathways in Alzheimer's disease models	2/365	22/10704	0.171723	0.476037	0.412407	6648/10018	2
R-HSA-8863678	Neurodegenerative Diseases	2/365	22/10704	0.171723	0.476037	0.412407	6648/10018	2
R-HSA-199418	Negative regulation of the PI3K/AKT network	6/365	110/10704	0.173094	0.478142	0.414231	1839/8870/2250/2247/3643/4615	6
R-HSA-2454202	Fc epsilon receptor (FCERI) signaling	7/365	134/10704	0.173427	0.478142	0.414231	5685/4792/4790/5530/5696/5698/4067	7
R-HSA-174084	Autodegradation of Cdh1 by Cdh1:APC/C	4/365	64/10704	0.17387	0.478142	0.414231	5685/7324/5696/5698	4
R-HSA-8951664	Neddylation	11/365	234/10704	0.176308	0.479899	0.415753	51667/5685/3091/7704/64344/6502/84541/80176/5696/5698/115290	11
R-HSA-373755	Semaphorin interactions	4/365	65/10704	0.180662	0.479899	0.415753	10371/10398/1809/27289	4
R-HSA-5358346	Hedgehog ligand biogenesis	4/365	65/10704	0.180662	0.479899	0.415753	5685/6868/5696/5698	4
R-HSA-174143	APC/C-mediated degradation of cell cycle proteins	5/365	88/10704	0.181184	0.479899	0.415753	5685/6502/7324/5696/5698	5
R-HSA-450531	Regulation of mRNA stability by proteins that bind AU-rich elements	5/365	88/10704	0.181184	0.479899	0.415753	5685/54464/677/5696/5698	5
R-HSA-453276	Regulation of mitotic cell cycle	5/365	88/10704	0.181184	0.479899	0.415753	5685/6502/7324/5696/5698	5
R-HSA-2559582	Senescence-Associated Secretory Phenotype (SASP)	6/365	112/10704	0.183237	0.479899	0.415753	6196/4790/3552/3569/3576/7324	6
R-HSA-1482801	Acyl chain remodelling of PS	2/365	23/10704	0.184076	0.479899	0.415753	51365/22925	2
R-HSA-450321	JNK (c-Jun kinases) phosphorylation and activation mediated by activated human TAK1	2/365	23/10704	0.184076	0.479899	0.415753	8767/3656	2
R-HSA-5654693	FRS-mediated FGFR1 signaling	2/365	23/10704	0.184076	0.479899	0.415753	2250/2247	2
R-HSA-5654695	PI-3K cascade:FGFR2	2/365	23/10704	0.184076	0.479899	0.415753	2250/2247	2
R-HSA-5654699	SHC-mediated cascade:FGFR2	2/365	23/10704	0.184076	0.479899	0.415753	2250/2247	2
R-HSA-8956321	Nucleotide salvage	2/365	23/10704	0.184076	0.479899	0.415753	1890/2766	2
R-HSA-9637690	Response of Mtb to phagocytosis	2/365	23/10704	0.184076	0.479899	0.415753	80824/57674	2
R-HSA-1566977	Fibronectin matrix formation	1/365	6/10704	0.187968	0.479899	0.415753	634	1
R-HSA-1614517	Sulfide oxidation to sulfate	1/365	6/10704	0.187968	0.479899	0.415753	58472	1
R-HSA-174362	Transport and synthesis of PAPS	1/365	6/10704	0.187968	0.479899	0.415753	1836	1
R-HSA-190370	FGFR1b ligand binding and activation	1/365	6/10704	0.187968	0.479899	0.415753	2247	1
R-HSA-3000471	Scavenging by Class B Receptors	1/365	6/10704	0.187968	0.479899	0.415753	6288	1
R-HSA-3000484	Scavenging by Class F Receptors	1/365	6/10704	0.187968	0.479899	0.415753	8578	1
R-HSA-3304356	SMAD2/3 Phosphorylation Motif Mutants in Cancer	1/365	6/10704	0.187968	0.479899	0.415753	4088	1
R-HSA-3656532	TGFBR1 KD Mutants in Cancer	1/365	6/10704	0.187968	0.479899	0.415753	4088	1
R-HSA-389599	Alpha-oxidation of phytanate	1/365	6/10704	0.187968	0.479899	0.415753	55825	1
R-HSA-5336415	Uptake and function of diphtheria toxin	1/365	6/10704	0.187968	0.479899	0.415753	1839	1
R-HSA-5626978	TNFR1-mediated ceramide production	1/365	6/10704	0.187968	0.479899	0.415753	7124	1
R-HSA-5693548	Sensing of DNA Double Strand Breaks	1/365	6/10704	0.187968	0.479899	0.415753	4683	1
R-HSA-8949275	RUNX3 Regulates Immune Response and Cell Migration	1/365	6/10704	0.187968	0.479899	0.415753	864	1
R-HSA-8964046	VLDL clearance	1/365	6/10704	0.187968	0.479899	0.415753	7436	1
R-HSA-9013957	TLR3-mediated TICAM1-dependent programmed cell death	1/365	6/10704	0.187968	0.479899	0.415753	7098	1
R-HSA-5633008	TP53 Regulates Transcription of Cell Death Genes	3/365	44/10704	0.18874	0.480684	0.416433	27113/604/5366	3
R-HSA-1257604	PIP3 activates AKT signaling	12/365	264/10704	0.191324	0.486066	0.421095	5685/1839/8870/2250/2247/5371/4343/3643/4615/84733/5696/5698	12
R-HSA-6802952	Signaling by BRAF and RAF fusions	4/365	67/10704	0.194503	0.492933	0.427044	3717/56829/409/10018	4
R-HSA-450302	activated TAK1 mediates p38 MAPK activation	2/365	24/10704	0.196551	0.495691	0.429434	8767/3656	2
R-HSA-5627123	RHO GTPases activate PAKs	2/365	24/10704	0.196551	0.495691	0.429434	4638/10398	2
R-HSA-1474228	Degradation of the extracellular matrix	7/365	140/10704	0.201404	0.504593	0.437146	960/3918/4811/101/6868/1520/3914	7
R-HSA-174154	APC/C:Cdc20 mediated degradation of Securin	4/365	68/10704	0.201545	0.504593	0.437146	5685/7324/5696/5698	4
R-HSA-3906995	Diseases associated with O-glycosylation of proteins	4/365	68/10704	0.201545	0.504593	0.437146	11174/55901/7057/11041	4
R-HSA-4086400	PCP/CE pathway	5/365	92/10704	0.204934	0.511839	0.443423	5685/409/4919/5696/5698	5
R-HSA-191273	Cholesterol biosynthesis	2/365	25/10704	0.209126	0.514847	0.44603	3157/4047	2
R-HSA-400685	Sema4D in semaphorin signaling	2/365	25/10704	0.209126	0.514847	0.44603	10398/27289	2
R-HSA-5654700	FRS-mediated FGFR2 signaling	2/365	25/10704	0.209126	0.514847	0.44603	2250/2247	2
R-HSA-5654708	Downstream signaling of activated FGFR3	2/365	25/10704	0.209126	0.514847	0.44603	2250/2247	2
R-HSA-9006335	Signaling by Erythropoietin	2/365	25/10704	0.209126	0.514847	0.44603	3717/4067	2
R-HSA-9013507	NOTCH3 Activation and Transmission of Signal to the Nucleus	2/365	25/10704	0.209126	0.514847	0.44603	182/54492	2
R-HSA-9020591	Interleukin-12 signaling	3/365	47/10704	0.215253	0.519436	0.450005	5898/3717/6648	3
R-HSA-977606	Regulation of Complement cascade	3/365	47/10704	0.215253	0.519436	0.450005	718/715/716	3
R-HSA-162791	Attachment of GPI anchor to uPAR	1/365	7/10704	0.215673	0.519436	0.450005	5329	1
R-HSA-199920	CREB phosphorylation	1/365	7/10704	0.215673	0.519436	0.450005	6196	1
R-HSA-3304349	Loss of Function of SMAD2/3 in Cancer	1/365	7/10704	0.215673	0.519436	0.450005	4088	1
R-HSA-3656534	Loss of Function of TGFBR1 in Cancer	1/365	7/10704	0.215673	0.519436	0.450005	4088	1
R-HSA-444257	RSK activation	1/365	7/10704	0.215673	0.519436	0.450005	6196	1
R-HSA-9635465	Suppression of apoptosis	1/365	7/10704	0.215673	0.519436	0.450005	57674	1
R-HSA-9637628	Modulation by Mtb of host immune system	1/365	7/10704	0.215673	0.519436	0.450005	7097	1
R-HSA-3781865	Diseases of glycosylation	7/365	143/10704	0.216013	0.519436	0.450005	11174/2683/6382/55901/7057/1836/11041	7
R-HSA-9662851	Anti-inflammatory response favouring Leishmania parasite infection	8/365	169/10704	0.219849	0.526212	0.455875	5576/79924/79651/3569/133/6868/11245/4067	8
R-HSA-9664433	Leishmania parasite growth and survival	8/365	169/10704	0.219849	0.526212	0.455875	5576/79924/79651/3569/133/6868/11245/4067	8
R-HSA-77387	Insulin receptor recycling	2/365	26/10704	0.221779	0.528386	0.457759	3643/155066	2
R-HSA-975576	N-glycan antennae elongation in the medial/trans-Golgi	2/365	26/10704	0.221779	0.528386	0.457759	2683/9334	2
R-HSA-2122947	NOTCH1 Intracellular Domain Regulates Transcription	3/365	48/10704	0.224261	0.531849	0.460759	9734/7089/3091	3
R-HSA-512988	Interleukin-3, Interleukin-5 and GM-CSF signaling	3/365	48/10704	0.224261	0.531849	0.460759	3717/3718/4067	3
R-HSA-202403	TCR signaling	6/365	120/10704	0.225982	0.533483	0.462174	5685/4792/8767/4790/5696/5698	6
R-HSA-69239	Synthesis of DNA	6/365	120/10704	0.225982	0.533483	0.462174	5685/4175/6502/7324/5696/5698	6
R-HSA-3858494	Beta-catenin independent WNT signaling	7/365	146/10704	0.230993	0.54037	0.468141	5685/5530/409/4343/4919/5696/5698	7
R-HSA-8878166	Transcriptional regulation by RUNX2	6/365	121/10704	0.231543	0.54037	0.468141	5685/6772/4091/6502/5696/5698	6
R-HSA-1236978	Cross-presentation of soluble exogenous antigens (endosomes)	3/365	49/10704	0.233342	0.54037	0.468141	5685/5696/5698	3
R-HSA-9012852	Signaling by NOTCH3	3/365	49/10704	0.233342	0.54037	0.468141	182/6772/54492	3
R-HSA-5621480	Dectin-2 family	2/365	27/10704	0.234492	0.54037	0.468141	26253/4067	2
R-HSA-912526	Interleukin receptor SHC signaling	2/365	27/10704	0.234492	0.54037	0.468141	3717/3718	2
R-HSA-174184	Cdc20:Phospho-APC/C mediated degradation of Cyclin A	4/365	73/10704	0.237794	0.54037	0.468141	5685/7324/5696/5698	4
R-HSA-69017	CDK-mediated phosphorylation and removal of Cdc6	4/365	73/10704	0.237794	0.54037	0.468141	5685/7324/5696/5698	4
R-HSA-1483148	Synthesis of PG	1/365	8/10704	0.242436	0.54037	0.468141	5337	1
R-HSA-174577	Activation of C3 and C5	1/365	8/10704	0.242436	0.54037	0.468141	718	1
R-HSA-3304351	Signaling by TGF-beta Receptor Complex in Cancer	1/365	8/10704	0.242436	0.54037	0.468141	4088	1
R-HSA-3656244	Defective B4GALT1 causes B4GALT1-CDG (CDG-2d)	1/365	8/10704	0.242436	0.54037	0.468141	2683	1
R-HSA-416550	Sema4D mediated inhibition of cell attachment and migration	1/365	8/10704	0.242436	0.54037	0.468141	27289	1
R-HSA-4411364	Binding of TCF/LEF:CTNNB1 to target gene promoters	1/365	8/10704	0.242436	0.54037	0.468141	864	1
R-HSA-444473	Formyl peptide receptors bind formyl peptides and many other ligands	1/365	8/10704	0.242436	0.54037	0.468141	6288	1
R-HSA-5362798	Release of Hh-Np from the secreting cell	1/365	8/10704	0.242436	0.54037	0.468141	6868	1
R-HSA-5632681	Ligand-receptor interactions	1/365	8/10704	0.242436	0.54037	0.468141	64399	1
R-HSA-5638302	Signaling by Overexpressed Wild-Type EGFR in Cancer	1/365	8/10704	0.242436	0.54037	0.468141	1839	1
R-HSA-5638303	Inhibition of Signaling by Overexpressed EGFR	1/365	8/10704	0.242436	0.54037	0.468141	1839	1
R-HSA-8948700	Competing endogenous RNAs (ceRNAs) regulate PTEN translation	1/365	8/10704	0.242436	0.54037	0.468141	4343	1
R-HSA-8951430	RUNX3 regulates WNT signaling	1/365	8/10704	0.242436	0.54037	0.468141	864	1
R-HSA-8951671	RUNX3 regulates YAP1-mediated transcription	1/365	8/10704	0.242436	0.54037	0.468141	864	1
R-HSA-8963896	HDL assembly	1/365	8/10704	0.242436	0.54037	0.468141	19	1
R-HSA-9012546	Interleukin-18 signaling	1/365	8/10704	0.242436	0.54037	0.468141	10068	1
R-HSA-177929	Signaling by EGFR	3/365	50/10704	0.242487	0.54037	0.468141	1839/6868/10252	3
R-HSA-211733	Regulation of activated PAK-2p34 by proteasome mediated degradation	3/365	50/10704	0.242487	0.54037	0.468141	5685/5696/5698	3
R-HSA-179419	APC:Cdc20 mediated degradation of cell cycle proteins prior to satisfation of the cell cycle checkpoint	4/365	74/10704	0.245225	0.545296	0.472408	5685/7324/5696/5698	4
R-HSA-9006925	Intracellular signaling by second messengers	13/365	306/10704	0.24607	0.54537	0.472472	5685/1839/5576/8870/2250/2247/5371/4343/3643/4615/84733/5696/5698	13
R-HSA-5358351	Signaling by Hedgehog	7/365	149/10704	0.246313	0.54537	0.472472	5685/5576/409/6868/64399/5696/5698	7
R-HSA-1482788	Acyl chain remodelling of PC	2/365	28/10704	0.247244	0.546262	0.473245	8605/22925	2
R-HSA-350562	Regulation of ornithine decarboxylase (ODC)	3/365	51/10704	0.25169	0.553717	0.479704	5685/5696/5698	3
R-HSA-3928665	EPH-ephrin mediated repulsion of cells	3/365	51/10704	0.25169	0.553717	0.479704	1947/1942/4067	3
R-HSA-373076	Class A/1 (Rhodopsin-like receptors)	14/365	335/10704	0.25399	0.557468	0.482954	6376/2920/6347/6364/6372/718/2921/6374/2919/3627/6373/3576/6288/6352	14
R-HSA-442742	CREB1 phosphorylation through NMDA receptor-mediated activation of RAS signaling	2/365	29/10704	0.260019	0.557468	0.482954	6196/5924	2
R-HSA-5654732	Negative regulation of FGFR3 signaling	2/365	29/10704	0.260019	0.557468	0.482954	2250/2247	2
R-HSA-5669034	TNFs bind their physiological receptors	2/365	29/10704	0.260019	0.557468	0.482954	10673/4049	2
R-HSA-8863795	Downregulation of ERBB2 signaling	2/365	29/10704	0.260019	0.557468	0.482954	1839/10193	2
R-HSA-9615017	FOXO-mediated transcription of oxidative stress, metabolic and neuronal genes	2/365	29/10704	0.260019	0.557468	0.482954	6648/4088	2
R-HSA-176409	APC/C:Cdc20 mediated degradation of mitotic proteins	4/365	76/10704	0.260235	0.557468	0.482954	5685/7324/5696/5698	4
R-HSA-204998	Cell death signalling via NRAGE, NRIF and NADE	4/365	76/10704	0.260235	0.557468	0.482954	5924/10018/8878/55701	4
R-HSA-180534	Vpu mediated degradation of CD4	3/365	52/10704	0.260942	0.557468	0.482954	5685/5696/5698	3
R-HSA-349425	Autodegradation of the E3 ubiquitin ligase COP1	3/365	52/10704	0.260942	0.557468	0.482954	5685/5696/5698	3
R-HSA-69601	Ubiquitin Mediated Degradation of Phosphorylated Cdc25A	3/365	52/10704	0.260942	0.557468	0.482954	5685/5696/5698	3
R-HSA-69610	p53-Independent DNA Damage Response	3/365	52/10704	0.260942	0.557468	0.482954	5685/5696/5698	3
R-HSA-69613	p53-Independent G1/S DNA damage checkpoint	3/365	52/10704	0.260942	0.557468	0.482954	5685/5696/5698	3
R-HSA-75815	Ubiquitin-dependent degradation of Cyclin D	3/365	52/10704	0.260942	0.557468	0.482954	5685/5696/5698	3
R-HSA-176814	Activation of APC/C and APC/C:Cdc20 mediated degradation of mitotic proteins	4/365	77/10704	0.267807	0.558168	0.48356	5685/7324/5696/5698	4
R-HSA-110357	Displacement of DNA glycosylase by APEX1	1/365	9/10704	0.268288	0.558168	0.48356	4913	1
R-HSA-1247673	Erythrocytes take up oxygen and release carbon dioxide	1/365	9/10704	0.268288	0.558168	0.48356	760	1
R-HSA-139915	Activation of PUMA and translocation to mitochondria	1/365	9/10704	0.268288	0.558168	0.48356	27113	1
R-HSA-212718	EGFR interacts with phospholipase C-gamma	1/365	9/10704	0.268288	0.558168	0.48356	1839	1
R-HSA-2179392	EGFR Transactivation by Gastrin	1/365	9/10704	0.268288	0.558168	0.48356	1839	1
R-HSA-427601	Multifunctional anion exchangers	1/365	9/10704	0.268288	0.558168	0.48356	1836	1
R-HSA-447041	CHL1 interactions	1/365	9/10704	0.268288	0.558168	0.48356	3673	1
R-HSA-5687613	Diseases associated with surfactant metabolism	1/365	9/10704	0.268288	0.558168	0.48356	21	1
R-HSA-8943723	Regulation of PTEN mRNA translation	1/365	9/10704	0.268288	0.558168	0.48356	4343	1
R-HSA-8948747	Regulation of PTEN localization	1/365	9/10704	0.268288	0.558168	0.48356	5371	1
R-HSA-8951936	RUNX3 regulates p14-ARF	1/365	9/10704	0.268288	0.558168	0.48356	864	1
R-HSA-9010642	ROBO receptors bind AKAP5	1/365	9/10704	0.268288	0.558168	0.48356	5576	1
R-HSA-169911	Regulation of Apoptosis	3/365	53/10704	0.270238	0.561097	0.486098	5685/5696/5698	3
R-HSA-418360	Platelet calcium homeostasis	2/365	30/10704	0.272801	0.564152	0.488744	5027/5025	2
R-HSA-5654696	Downstream signaling of activated FGFR2	2/365	30/10704	0.272801	0.564152	0.488744	2250/2247	2
R-HSA-1483206	Glycerophospholipid biosynthesis	6/365	129/10704	0.277434	0.572427	0.495913	5337/8605/5920/51365/23171/22925	6
R-HSA-8848021	Signaling by PTK6	3/365	54/10704	0.27957	0.572427	0.495913	3091/1839/55620	3
R-HSA-8854050	FBXL7 down-regulates AURKA during mitotic entry and in early mitosis	3/365	54/10704	0.27957	0.572427	0.495913	5685/5696/5698	3
R-HSA-9006927	Signaling by Non-Receptor Tyrosine Kinases	3/365	54/10704	0.27957	0.572427	0.495913	3091/1839/55620	3
R-HSA-9604323	Negative regulation of NOTCH4 signaling	3/365	54/10704	0.27957	0.572427	0.495913	5685/5696/5698	3
R-HSA-182971	EGFR downregulation	2/365	31/10704	0.285573	0.577582	0.500379	1839/10252	2
R-HSA-5654687	Downstream signaling of activated FGFR1	2/365	31/10704	0.285573	0.577582	0.500379	2250/2247	2
R-HSA-917977	Transferrin endocytosis and recycling	2/365	31/10704	0.285573	0.577582	0.500379	7037/155066	2
R-HSA-174113	SCF-beta-TrCP mediated degradation of Emi1	3/365	55/10704	0.288932	0.577582	0.500379	5685/5696/5698	3
R-HSA-4641257	Degradation of AXIN	3/365	55/10704	0.288932	0.577582	0.500379	5685/5696/5698	3
R-HSA-438064	Post NMDA receptor activation events	4/365	80/10704	0.290743	0.577582	0.500379	6196/5924/5576/4900	4
R-HSA-112311	Neurotransmitter clearance	1/365	10/10704	0.29326	0.577582	0.500379	4128	1
R-HSA-1250342	PI3K events in ERBB4 signaling	1/365	10/10704	0.29326	0.577582	0.500379	1839	1
R-HSA-1483115	Hydrolysis of LPC	1/365	10/10704	0.29326	0.577582	0.500379	8605	1
R-HSA-164940	Nef mediated downregulation of MHC class I complex cell surface expression	1/365	10/10704	0.29326	0.577582	0.500379	3105	1
R-HSA-190377	FGFR2b ligand binding and activation	1/365	10/10704	0.29326	0.577582	0.500379	2247	1
R-HSA-209968	Thyroxine biosynthesis	1/365	10/10704	0.29326	0.577582	0.500379	1734	1
R-HSA-2161522	Abacavir transport and metabolism	1/365	10/10704	0.29326	0.577582	0.500379	22978	1
R-HSA-399997	Acetylcholine regulates insulin secretion	1/365	10/10704	0.29326	0.577582	0.500379	4082	1
R-HSA-5685939	HDR through MMEJ (alt-NHEJ)	1/365	10/10704	0.29326	0.577582	0.500379	4683	1
R-HSA-8964058	HDL remodeling	1/365	10/10704	0.29326	0.577582	0.500379	9388	1
R-HSA-937042	IRAK2 mediated activation of TAK1 complex	1/365	10/10704	0.29326	0.577582	0.500379	3656	1
R-HSA-9675135	Diseases of DNA repair	1/365	10/10704	0.29326	0.577582	0.500379	4913	1
R-HSA-9683610	Maturation of nucleoprotein	1/365	10/10704	0.29326	0.577582	0.500379	54625	1
R-HSA-9694631	Maturation of nucleoprotein	1/365	10/10704	0.29326	0.577582	0.500379	54625	1
R-HSA-2151201	Transcriptional activation of mitochondrial biogenesis	3/365	56/10704	0.298317	0.581162	0.50348	6648/85441/3418	3
R-HSA-450408	AUF1 (hnRNP D0) binds and destabilizes mRNA	3/365	56/10704	0.298317	0.581162	0.50348	5685/5696/5698	3
R-HSA-5362768	Hh mutants that don't undergo autocatalytic processing are degraded by ERAD	3/365	56/10704	0.298317	0.581162	0.50348	5685/5696/5698	3
R-HSA-2173796	SMAD2/SMAD3:SMAD4 heterotrimer regulates transcription	2/365	32/10704	0.298323	0.581162	0.50348	4088/3726	2
R-HSA-5656169	Termination of translesion DNA synthesis	2/365	32/10704	0.298323	0.581162	0.50348	9246/9636	2
R-HSA-176408	Regulation of APC/C activators between G1/S and early anaphase	4/365	81/10704	0.29845	0.581162	0.50348	5685/7324/5696/5698	4
R-HSA-4641258	Degradation of DVL	3/365	57/10704	0.307718	0.589179	0.510426	5685/5696/5698	3
R-HSA-69541	Stabilization of p53	3/365	57/10704	0.307718	0.589179	0.510426	5685/5696/5698	3
R-HSA-8957275	Post-translational protein phosphorylation	5/365	108/10704	0.308007	0.589179	0.510426	8542/8614/718/3569/1435	5
R-HSA-1839126	FGFR2 mutant receptor activation	2/365	33/10704	0.311036	0.589179	0.510426	2250/2247	2
R-HSA-1980145	Signaling by NOTCH2	2/365	33/10704	0.311036	0.589179	0.510426	182/54492	2
R-HSA-2871809	FCERI mediated Ca+2 mobilization	2/365	33/10704	0.311036	0.589179	0.510426	5530/4067	2
R-HSA-352230	Amino acid transport across the plasma membrane	2/365	33/10704	0.311036	0.589179	0.510426	6542/92745	2
R-HSA-5654726	Negative regulation of FGFR1 signaling	2/365	33/10704	0.311036	0.589179	0.510426	2250/2247	2
R-HSA-195253	Degradation of beta-catenin by the destruction complex	4/365	83/10704	0.313933	0.589179	0.510426	5685/7089/5696/5698	4
R-HSA-69202	Cyclin E associated events during G1/S transition	4/365	83/10704	0.313933	0.589179	0.510426	5685/6502/5696/5698	4
R-HSA-1236394	Signaling by ERBB4	3/365	58/10704	0.31713	0.589179	0.510426	1839/10608/6868	3
R-HSA-166658	Complement cascade	3/365	58/10704	0.31713	0.589179	0.510426	718/715/716	3
R-HSA-186797	Signaling by PDGF	3/365	58/10704	0.31713	0.589179	0.510426	6772/7057/56034	3
R-HSA-917937	Iron uptake and transport	3/365	58/10704	0.31713	0.589179	0.510426	7037/4891/155066	3
R-HSA-196791	Vitamin D (calciferol) metabolism	1/365	11/10704	0.317382	0.589179	0.510426	5641	1
R-HSA-2022923	Dermatan sulfate biosynthesis	1/365	11/10704	0.317382	0.589179	0.510426	29940	1
R-HSA-2025928	Calcineurin activates NFAT	1/365	11/10704	0.317382	0.589179	0.510426	5530	1
R-HSA-2534343	Interaction With Cumulus Cells And The Zona Pellucida	1/365	11/10704	0.317382	0.589179	0.510426	2683	1
R-HSA-2586552	Signaling by Leptin	1/365	11/10704	0.317382	0.589179	0.510426	3717	1
R-HSA-351906	Apoptotic cleavage of cell adhesion proteins	1/365	11/10704	0.317382	0.589179	0.510426	1832	1
R-HSA-68689	CDC6 association with the ORC:origin complex	1/365	11/10704	0.317382	0.589179	0.510426	1870	1
R-HSA-73614	Pyrimidine salvage	1/365	11/10704	0.317382	0.589179	0.510426	1890	1
R-HSA-9013700	NOTCH4 Activation and Transmission of Signal to the Nucleus	1/365	11/10704	0.317382	0.589179	0.510426	182	1
R-HSA-9014325	TICAM1,TRAF6-dependent induction of TAK1 complex	1/365	11/10704	0.317382	0.589179	0.510426	7098	1
R-HSA-9645460	Alpha-protein kinase 1 signaling pathway	1/365	11/10704	0.317382	0.589179	0.510426	92610	1
R-HSA-9664873	Pexophagy	1/365	11/10704	0.317382	0.589179	0.510426	8878	1
R-HSA-196854	Metabolism of vitamins and cofactors	8/365	190/10704	0.322066	0.596804	0.517031	10135/6382/3949/2643/4907/441024/54625/6573	8
R-HSA-5654727	Negative regulation of FGFR2 signaling	2/365	34/10704	0.3237	0.597609	0.517729	2250/2247	2
R-HSA-193648	NRAGE signals death through JNK	3/365	59/10704	0.326547	0.597609	0.517729	5924/10018/55701	3
R-HSA-5387390	Hh mutants abrogate ligand secretion	3/365	59/10704	0.326547	0.597609	0.517729	5685/5696/5698	3
R-HSA-68827	CDT1 association with the CDC6:ORC:origin complex	3/365	59/10704	0.326547	0.597609	0.517729	5685/5696/5698	3
R-HSA-9664407	Parasite infection	3/365	59/10704	0.326547	0.597609	0.517729	4651/10458/4067	3
R-HSA-9664417	Leishmania phagocytosis	3/365	59/10704	0.326547	0.597609	0.517729	4651/10458/4067	3
R-HSA-9664422	FCGR3A-mediated phagocytosis	3/365	59/10704	0.326547	0.597609	0.517729	4651/10458/4067	3
R-HSA-69656	Cyclin A:Cdk2-associated events at S phase entry	4/365	85/10704	0.329485	0.601921	0.521465	5685/6502/5696/5698	4
R-HSA-5610780	Degradation of GLI1 by the proteasome	3/365	60/10704	0.335962	0.603195	0.522568	5685/5696/5698	3
R-HSA-5610783	Degradation of GLI2 by the proteasome	3/365	60/10704	0.335962	0.603195	0.522568	5685/5696/5698	3
R-HSA-5610785	GLI3 is processed to GLI3R by the proteasome	3/365	60/10704	0.335962	0.603195	0.522568	5685/5696/5698	3
R-HSA-2029480	Fcgamma receptor (FCGR) dependent phagocytosis	4/365	86/10704	0.337278	0.603195	0.522568	5337/4651/10458/4067	4
R-HSA-112308	Presynaptic depolarization and calcium channel opening	1/365	12/10704	0.340682	0.603195	0.522568	773	1
R-HSA-1474151	Tetrahydrobiopterin (BH4) synthesis, recycling, salvage and regulation	1/365	12/10704	0.340682	0.603195	0.522568	2643	1
R-HSA-174403	Glutathione synthesis and recycling	1/365	12/10704	0.340682	0.603195	0.522568	55748	1
R-HSA-176974	Unwinding of DNA	1/365	12/10704	0.340682	0.603195	0.522568	4175	1
R-HSA-2029481	FCGR activation	1/365	12/10704	0.340682	0.603195	0.522568	4067	1
R-HSA-209822	Glycoprotein hormones	1/365	12/10704	0.340682	0.603195	0.522568	3624	1
R-HSA-210990	PECAM1 interactions	1/365	12/10704	0.340682	0.603195	0.522568	4067	1
R-HSA-2160916	Hyaluronan uptake and degradation	1/365	12/10704	0.340682	0.603195	0.522568	960	1
R-HSA-4641265	Repression of WNT target genes	1/365	12/10704	0.340682	0.603195	0.522568	7089	1
R-HSA-73817	Purine ribonucleoside monophosphate biosynthesis	1/365	12/10704	0.340682	0.603195	0.522568	3614	1
R-HSA-8866427	VLDLR internalisation and degradation	1/365	12/10704	0.340682	0.603195	0.522568	7436	1
R-HSA-9020558	Interleukin-2 signaling	1/365	12/10704	0.340682	0.603195	0.522568	3718	1
R-HSA-9673767	Signaling by PDGFRA transmembrane, juxtamembrane and kinase domain mutants	1/365	12/10704	0.340682	0.603195	0.522568	6772	1
R-HSA-9673770	Signaling by PDGFRA extracellular domain mutants	1/365	12/10704	0.340682	0.603195	0.522568	6772	1
R-HSA-6807070	PTEN Regulation	6/365	140/10704	0.343422	0.607005	0.525869	5685/5371/4343/84733/5696/5698	6
R-HSA-5678895	Defective CFTR causes cystic fibrosis	3/365	61/10704	0.345371	0.609409	0.527952	5685/5696/5698	3
R-HSA-1266695	Interleukin-7 signaling	2/365	36/10704	0.348838	0.614478	0.532343	3718/3575	2
R-HSA-5687128	MAPK6/MAPK4 signaling	4/365	89/10704	0.360689	0.622784	0.539539	5685/4343/5696/5698	4
R-HSA-3299685	Detoxification of Reactive Oxygen Species	2/365	37/10704	0.361291	0.622784	0.539539	6648/493869	2
R-HSA-9029569	NR1H3 & NR1H2 regulate gene expression linked to cholesterol transport and efflux	2/365	37/10704	0.361291	0.622784	0.539539	4343/19	2
R-HSA-1237044	Erythrocytes take up carbon dioxide and release oxygen	1/365	13/10704	0.36319	0.622784	0.539539	760	1
R-HSA-1358803	Downregulation of ERBB2:ERBB3 signaling	1/365	13/10704	0.36319	0.622784	0.539539	10193	1
R-HSA-1480926	O2/CO2 exchange in erythrocytes	1/365	13/10704	0.36319	0.622784	0.539539	760	1
R-HSA-171007	p38MAPK events	1/365	13/10704	0.36319	0.622784	0.539539	5898	1
R-HSA-179812	GRB2 events in EGFR signaling	1/365	13/10704	0.36319	0.622784	0.539539	1839	1
R-HSA-203615	eNOS activation	1/365	13/10704	0.36319	0.622784	0.539539	114757	1
R-HSA-2168880	Scavenging of heme from plasma	1/365	13/10704	0.36319	0.622784	0.539539	8542	1
R-HSA-2892247	POU5F1 (OCT4), SOX2, NANOG activate genes related to proliferation	1/365	13/10704	0.36319	0.622784	0.539539	2247	1
R-HSA-5140745	WNT5A-dependent internalization of FZD2, FZD5 and ROR2	1/365	13/10704	0.36319	0.622784	0.539539	4919	1
R-HSA-5607763	CLEC7A (Dectin-1) induces NFAT activation	1/365	13/10704	0.36319	0.622784	0.539539	5530	1
R-HSA-74217	Purine salvage	1/365	13/10704	0.36319	0.622784	0.539539	2766	1
R-HSA-879415	Advanced glycosylation endproduct receptor signaling	1/365	13/10704	0.36319	0.622784	0.539539	6288	1
R-HSA-8847993	ERBB2 Activates PTK6 Signaling	1/365	13/10704	0.36319	0.622784	0.539539	1839	1
R-HSA-1226099	Signaling by FGFR in disease	3/365	63/10704	0.364148	0.623393	0.540066	6772/2250/2247	3
R-HSA-1474290	Collagen formation	4/365	90/10704	0.368491	0.629668	0.545502	3918/3691/1520/3914	4
R-HSA-1989781	PPARA activates gene expression	5/365	117/10704	0.369031	0.629668	0.545502	3157/50486/85441/27242/19	5
R-HSA-421270	Cell-cell junction organization	3/365	64/10704	0.373506	0.634414	0.549615	50848/23562/9076	3
R-HSA-4608870	Asymmetric localization of PCP proteins	3/365	64/10704	0.373506	0.634414	0.549615	5685/5696/5698	3
R-HSA-8950505	Gene and protein expression by JAK-STAT signaling after Interleukin-12 stimulation	2/365	38/10704	0.373654	0.634414	0.549615	5898/6648	2
R-HSA-400206	Regulation of lipid metabolism by PPARalpha	5/365	119/10704	0.382662	0.63683	0.551708	3157/50486/85441/27242/19	5
R-HSA-111885	Opioid Signalling	4/365	92/10704	0.384078	0.63683	0.551708	5141/5576/5530/5142	4
R-HSA-2682334	EPH-Ephrin signaling	4/365	92/10704	0.384078	0.63683	0.551708	1947/10398/1942/4067	4
R-HSA-1250347	SHC1 events in ERBB4 signaling	1/365	14/10704	0.384931	0.63683	0.551708	1839	1
R-HSA-1614558	Degradation of cysteine and homocysteine	1/365	14/10704	0.384931	0.63683	0.551708	58472	1
R-HSA-162658	Golgi Cisternae Pericentriolar Stack Reorganization	1/365	14/10704	0.384931	0.63683	0.551708	8548	1
R-HSA-180336	SHC1 events in EGFR signaling	1/365	14/10704	0.384931	0.63683	0.551708	1839	1
R-HSA-190322	FGFR4 ligand binding and activation	1/365	14/10704	0.384931	0.63683	0.551708	2247	1
R-HSA-209952	Peptide hormone biosynthesis	1/365	14/10704	0.384931	0.63683	0.551708	3624	1
R-HSA-3656237	Defective EXT2 causes exostoses 2	1/365	14/10704	0.384931	0.63683	0.551708	6382	1
R-HSA-3656253	Defective EXT1 causes exostoses 1, TRPS2 and CHDS	1/365	14/10704	0.384931	0.63683	0.551708	6382	1
R-HSA-442720	CREB1 phosphorylation through the activation of Adenylate Cyclase	1/365	14/10704	0.384931	0.63683	0.551708	5576	1
R-HSA-6803205	TP53 regulates transcription of several additional cell death genes whose specific roles in p53-dependent apoptosis remain uncertain	1/365	14/10704	0.384931	0.63683	0.551708	604	1
R-HSA-71240	Tryptophan catabolism	1/365	14/10704	0.384931	0.63683	0.551708	883	1
R-HSA-8964539	Glutamate and glutamine metabolism	1/365	14/10704	0.384931	0.63683	0.551708	883	1
R-HSA-975110	TRAF6 mediated IRF7 activation in TLR7/8 or 9 signaling	1/365	14/10704	0.384931	0.63683	0.551708	4615	1
R-HSA-110313	Translesion synthesis by Y family DNA polymerases bypasses lesions on DNA template	2/365	39/10704	0.385919	0.636964	0.551824	9246/9636	2
R-HSA-9679506	SARS-CoV Infections	6/365	147/10704	0.386244	0.636964	0.551824	3717/3718/3614/3455/6773/54625	6
R-HSA-5619115	Disorders of transmembrane transporters	7/365	175/10704	0.388259	0.639267	0.553819	5685/4891/1836/19/21/5696/5698	7
R-HSA-442755	Activation of NMDA receptors and postsynaptic events	4/365	93/10704	0.391855	0.642583	0.556691	6196/5924/5576/4900	4
R-HSA-69563	p53-Dependent G1 DNA Damage Response	3/365	66/10704	0.392137	0.642583	0.556691	5685/5696/5698	3
R-HSA-69580	p53-Dependent G1/S DNA damage checkpoint	3/365	66/10704	0.392137	0.642583	0.556691	5685/5696/5698	3
R-HSA-5654741	Signaling by FGFR3	2/365	40/10704	0.398079	0.650259	0.563341	2250/2247	2
R-HSA-9664323	FCGR3A-mediated IL10 synthesis	2/365	40/10704	0.398079	0.650259	0.563341	5576/4067	2
R-HSA-381119	Unfolded Protein Response (UPR)	4/365	94/10704	0.399618	0.651744	0.564628	6347/467/3576/2081	4
R-HSA-1170546	Prolactin receptor signaling	1/365	15/10704	0.405932	0.651761	0.564643	3717	1
R-HSA-2162123	Synthesis of Prostaglandins (PG) and Thromboxanes (TX)	1/365	15/10704	0.405932	0.651761	0.564643	9536	1
R-HSA-3134975	Regulation of innate immune responses to cytosolic DNA	1/365	15/10704	0.405932	0.651761	0.564643	6737	1
R-HSA-430039	mRNA decay by 5' to 3' exoribonuclease	1/365	15/10704	0.405932	0.651761	0.564643	54464	1
R-HSA-5099900	WNT5A-dependent internalization of FZD4	1/365	15/10704	0.405932	0.651761	0.564643	409	1
R-HSA-5654228	Phospholipase C-mediated cascade; FGFR4	1/365	15/10704	0.405932	0.651761	0.564643	2247	1
R-HSA-6785631	ERBB2 Regulates Cell Motility	1/365	15/10704	0.405932	0.651761	0.564643	1839	1
R-HSA-8956320	Nucleobase biosynthesis	1/365	15/10704	0.405932	0.651761	0.564643	3614	1
R-HSA-937039	IRAK1 recruits IKK complex	1/365	15/10704	0.405932	0.651761	0.564643	57162	1
R-HSA-975144	IRAK1 recruits IKK complex upon TLR7/8 or 9 stimulation	1/365	15/10704	0.405932	0.651761	0.564643	57162	1
R-HSA-196849	Metabolism of water-soluble vitamins and cofactors	5/365	123/10704	0.409874	0.656239	0.568522	10135/4907/441024/54625/6573	5
R-HSA-5658442	Regulation of RAS by GAPs	3/365	68/10704	0.410625	0.656239	0.568522	5685/5696/5698	3
R-HSA-69615	G1/S DNA Damage Checkpoints	3/365	68/10704	0.410625	0.656239	0.568522	5685/5696/5698	3
R-HSA-8948751	Regulation of PTEN stability and activity	3/365	69/10704	0.419805	0.662721	0.574138	5685/5696/5698	3
R-HSA-3769402	Deactivation of the beta-catenin transactivating complex	2/365	42/10704	0.422054	0.662721	0.574138	7089/64321	2
R-HSA-3928662	EPHB-mediated forward signaling	2/365	42/10704	0.422054	0.662721	0.574138	1947/4067	2
R-HSA-381426	Regulation of Insulin-like Growth Factor (IGF) transport and uptake by Insulin-like Growth Factor Binding Proteins (IGFBPs)	5/365	125/10704	0.423425	0.662721	0.574138	8542/8614/718/3569/1435	5
R-HSA-1433559	Regulation of KIT signaling	1/365	16/10704	0.426218	0.662721	0.574138	4067	1
R-HSA-1834941	STING mediated induction of host immune responses	1/365	16/10704	0.426218	0.662721	0.574138	6737	1
R-HSA-1963640	GRB2 events in ERBB2 signaling	1/365	16/10704	0.426218	0.662721	0.574138	1839	1
R-HSA-1963642	PI3K events in ERBB2 signaling	1/365	16/10704	0.426218	0.662721	0.574138	1839	1
R-HSA-204174	Regulation of pyruvate dehydrogenase (PDH) complex	1/365	16/10704	0.426218	0.662721	0.574138	5166	1
R-HSA-205043	NRIF signals cell death from the nucleus	1/365	16/10704	0.426218	0.662721	0.574138	8878	1
R-HSA-2173791	TGF-beta receptor signaling in EMT (epithelial to mesenchymal transition)	1/365	16/10704	0.426218	0.662721	0.574138	50848	1
R-HSA-2559584	Formation of Senescence-Associated Heterochromatin Foci (SAHF)	1/365	16/10704	0.426218	0.662721	0.574138	8091	1
R-HSA-2730905	Role of LAT2/NTAL/LAB on calcium mobilization	1/365	16/10704	0.426218	0.662721	0.574138	4067	1
R-HSA-391160	Signal regulatory protein family interactions	1/365	16/10704	0.426218	0.662721	0.574138	961	1
R-HSA-399954	Sema3A PAK dependent Axon repulsion	1/365	16/10704	0.426218	0.662721	0.574138	10371	1
R-HSA-418457	cGMP effects	1/365	16/10704	0.426218	0.662721	0.574138	10846	1
R-HSA-5684264	MAP3K8 (TPL2)-dependent MAPK1/3 activation	1/365	16/10704	0.426218	0.662721	0.574138	4790	1
R-HSA-975163	IRAK2 mediated activation of TAK1 complex upon TLR7/8 or 9 stimulation	1/365	16/10704	0.426218	0.662721	0.574138	3656	1
R-HSA-8878171	Transcriptional regulation by RUNX1	9/365	239/10704	0.428879	0.665858	0.576855	5685/10398/3977/7057/5371/4343/84733/5696/5698	9
R-HSA-1660661	Sphingolipid de novo biosynthesis	2/365	43/10704	0.433856	0.670564	0.580932	25865/8613	2
R-HSA-5655253	Signaling by FGFR2 in disease	2/365	43/10704	0.433856	0.670564	0.580932	2250/2247	2
R-HSA-9656223	Signaling by RAF1 mutants	2/365	43/10704	0.433856	0.670564	0.580932	3717/409	2
R-HSA-1483257	Phospholipid metabolism	8/365	212/10704	0.436249	0.673256	0.583265	5337/8605/57664/5920/51365/25816/23171/22925	8
R-HSA-109704	PI3K Cascade	2/365	44/10704	0.445528	0.67492	0.584706	2250/2247	2
R-HSA-2173793	Transcriptional activity of SMAD2/SMAD3:SMAD4 heterotrimer	2/365	44/10704	0.445528	0.67492	0.584706	4088/3726	2
R-HSA-975634	Retinoid metabolism and transport	2/365	44/10704	0.445528	0.67492	0.584706	6382/3949	2
R-HSA-164378	PKA activation in glucagon signalling	1/365	17/10704	0.445813	0.67492	0.584706	5576	1
R-HSA-180292	GAB1 signalosome	1/365	17/10704	0.445813	0.67492	0.584706	1839	1
R-HSA-202131	Metabolism of nitric oxide: NOS3 activation and regulation	1/365	17/10704	0.445813	0.67492	0.584706	114757	1
R-HSA-2142845	Hyaluronan metabolism	1/365	17/10704	0.445813	0.67492	0.584706	960	1
R-HSA-3781860	Diseases associated with N-glycosylation of proteins	1/365	17/10704	0.445813	0.67492	0.584706	2683	1
R-HSA-450513	Tristetraprolin (TTP, ZFP36) binds and destabilizes mRNA	1/365	17/10704	0.445813	0.67492	0.584706	54464	1
R-HSA-4655427	SUMOylation of DNA methylation proteins	1/365	17/10704	0.445813	0.67492	0.584706	84733	1
R-HSA-937072	TRAF6-mediated induction of TAK1 complex within TLR4 complex	1/365	17/10704	0.445813	0.67492	0.584706	3656	1
R-HSA-9659787	Aberrant regulation of mitotic G1/S transition in cancer due to RB1 defects	1/365	17/10704	0.445813	0.67492	0.584706	1870	1
R-HSA-9661069	Defective binding of RB1 mutants to E2F1,(E2F2, E2F3)	1/365	17/10704	0.445813	0.67492	0.584706	1870	1
R-HSA-162909	Host Interactions of HIV factors	5/365	130/10704	0.457022	0.689443	0.597288	5685/5696/3105/60489/5698	5
R-HSA-5668914	Diseases of metabolism	9/365	245/10704	0.458155	0.689443	0.597288	11174/2683/6382/55901/7057/1836/21/11041/4128	9
R-HSA-5689603	UCH proteinases	4/365	102/10704	0.460902	0.689443	0.597288	5685/9958/5696/5698	4
R-HSA-69206	G1/S Transition	5/365	131/10704	0.463681	0.689443	0.597288	5685/4175/6502/5696/5698	5
R-HSA-1368082	RORA activates gene expression	1/365	18/10704	0.46474	0.689443	0.597288	85441	1
R-HSA-1369062	ABC transporters in lipid homeostasis	1/365	18/10704	0.46474	0.689443	0.597288	21	1
R-HSA-181430	Norepinephrine Neurotransmitter Release Cycle	1/365	18/10704	0.46474	0.689443	0.597288	4128	1
R-HSA-1839117	Signaling by cytosolic FGFR1 fusion mutants	1/365	18/10704	0.46474	0.689443	0.597288	6772	1
R-HSA-190840	Microtubule-dependent trafficking of connexons from Golgi to the plasma membrane	1/365	18/10704	0.46474	0.689443	0.597288	2697	1
R-HSA-1912420	Pre-NOTCH Processing in Golgi	1/365	18/10704	0.46474	0.689443	0.597288	2683	1
R-HSA-209776	Metabolism of amine-derived hormones	1/365	18/10704	0.46474	0.689443	0.597288	1734	1
R-HSA-446353	Cell-extracellular matrix interactions	1/365	18/10704	0.46474	0.689443	0.597288	55679	1
R-HSA-5635838	Activation of SMO	1/365	18/10704	0.46474	0.689443	0.597288	409	1
R-HSA-936964	Activation of IRF3/IRF7 mediated by TBK1/IKK epsilon	1/365	18/10704	0.46474	0.689443	0.597288	9641	1
R-HSA-382556	ABC-family proteins mediated transport	4/365	103/10704	0.468423	0.692976	0.600349	5685/21/5696/5698	4
R-HSA-8854214	TBC/RABGAPs	2/365	46/10704	0.468463	0.692976	0.600349	10133/51762	2
R-HSA-2219530	Constitutive Signaling by Aberrant PI3K in Cancer	3/365	75/10704	0.473762	0.698245	0.604914	1839/2250/2247	3
R-HSA-69242	S Phase	6/365	162/10704	0.47741	0.698245	0.604914	5685/4175/6502/7324/5696/5698	6
R-HSA-190828	Gap junction trafficking	2/365	47/10704	0.479716	0.698245	0.604914	2697/1601	2
R-HSA-6802946	Signaling by moderate kinase activity BRAF mutants	2/365	47/10704	0.479716	0.698245	0.604914	3717/409	2
R-HSA-6802949	Signaling by RAS mutants	2/365	47/10704	0.479716	0.698245	0.604914	3717/409	2
R-HSA-6802955	Paradoxical activation of RAF signaling by kinase inactive BRAF	2/365	47/10704	0.479716	0.698245	0.604914	3717/409	2
R-HSA-9024446	NR1H2 and NR1H3-mediated signaling	2/365	47/10704	0.479716	0.698245	0.604914	4343/19	2
R-HSA-9649948	Signaling downstream of RAS mutants	2/365	47/10704	0.479716	0.698245	0.604914	3717/409	2
R-HSA-1482925	Acyl chain remodelling of PG	1/365	19/10704	0.483023	0.698245	0.604914	22925	1
R-HSA-190872	Transport of connexons to the plasma membrane	1/365	19/10704	0.483023	0.698245	0.604914	2697	1
R-HSA-3928664	Ephrin signaling	1/365	19/10704	0.483023	0.698245	0.604914	1947	1
R-HSA-422085	Synthesis, secretion, and deacylation of Ghrelin	1/365	19/10704	0.483023	0.698245	0.604914	9314	1
R-HSA-5576886	Phase 4 - resting membrane potential	1/365	19/10704	0.483023	0.698245	0.604914	60598	1
R-HSA-5686938	Regulation of TLR by endogenous ligand	1/365	19/10704	0.483023	0.698245	0.604914	7097	1
R-HSA-8851708	Signaling by FGFR2 IIIa TM	1/365	19/10704	0.483023	0.698245	0.604914	2247	1
R-HSA-8963898	Plasma lipoprotein assembly	1/365	19/10704	0.483023	0.698245	0.604914	19	1
R-HSA-9660821	ADORA2B mediated anti-inflammatory cytokines production	5/365	134/10704	0.483505	0.698245	0.604914	5576/79924/3569/133/11245	5
R-HSA-425407	SLC-mediated transmembrane transport	9/365	251/10704	0.487181	0.70055	0.60691	6542/92745/6558/51296/4891/10723/66035/1836/11182	9
R-HSA-112399	IRS-mediated signalling	2/365	48/10704	0.490823	0.70055	0.60691	2250/2247	2
R-HSA-6806667	Metabolism of fat-soluble vitamins	2/365	48/10704	0.490823	0.70055	0.60691	6382/3949	2
R-HSA-73893	DNA Damage Bypass	2/365	48/10704	0.490823	0.70055	0.60691	9246/9636	2
R-HSA-8852276	The role of GTSE1 in G2/M progression after G2 checkpoint	3/365	77/10704	0.491242	0.70055	0.60691	5685/5696/5698	3
R-HSA-422356	Regulation of insulin secretion	3/365	78/10704	0.499875	0.70055	0.60691	5576/773/4082	3
R-HSA-1181150	Signaling by NODAL	1/365	20/10704	0.500683	0.70055	0.60691	4088	1
R-HSA-163615	PKA activation	1/365	20/10704	0.500683	0.70055	0.60691	5576	1
R-HSA-167044	Signalling to RAS	1/365	20/10704	0.500683	0.70055	0.60691	5898	1
R-HSA-176407	Conversion from APC/C:Cdc20 to APC/C:Cdh1 in late anaphase	1/365	20/10704	0.500683	0.70055	0.60691	7324	1
R-HSA-176412	Phosphorylation of the APC/C	1/365	20/10704	0.500683	0.70055	0.60691	7324	1
R-HSA-3560783	Defective B4GALT7 causes EDS, progeroid type	1/365	20/10704	0.500683	0.70055	0.60691	6382	1
R-HSA-3560801	Defective B3GAT3 causes JDSSDHD	1/365	20/10704	0.500683	0.70055	0.60691	6382	1
R-HSA-388844	Receptor-type tyrosine-protein phosphatases	1/365	20/10704	0.500683	0.70055	0.60691	8496	1
R-HSA-4420332	Defective B3GALT6 causes EDSP2 and SEMDJL1	1/365	20/10704	0.500683	0.70055	0.60691	6382	1
R-HSA-5625900	RHO GTPases activate CIT	1/365	20/10704	0.500683	0.70055	0.60691	10398	1
R-HSA-5627117	RHO GTPases Activate ROCKs	1/365	20/10704	0.500683	0.70055	0.60691	10398	1
R-HSA-5654719	SHC-mediated cascade:FGFR4	1/365	20/10704	0.500683	0.70055	0.60691	2247	1
R-HSA-5654720	PI-3K cascade:FGFR4	1/365	20/10704	0.500683	0.70055	0.60691	2247	1
R-HSA-8978934	Metabolism of cofactors	1/365	20/10704	0.500683	0.70055	0.60691	2643	1
R-HSA-9013695	NOTCH4 Intracellular Domain Regulates Transcription	1/365	20/10704	0.500683	0.70055	0.60691	4088	1
R-HSA-9603798	Class I peroxisomal membrane protein import	1/365	20/10704	0.500683	0.70055	0.60691	11264	1
R-HSA-9671555	Signaling by PDGFR in disease	1/365	20/10704	0.500683	0.70055	0.60691	6772	1
R-HSA-157858	Gap junction trafficking and regulation	2/365	49/10704	0.50178	0.701135	0.607418	2697/1601	2
R-HSA-6806834	Signaling by MET	3/365	79/10704	0.508433	0.709474	0.614641	3918/3673/3914	3
R-HSA-1227986	Signaling by ERBB2	2/365	50/10704	0.512584	0.711824	0.616678	1839/10193	2
R-HSA-1793185	Chondroitin sulfate/dermatan sulfate metabolism	2/365	50/10704	0.512584	0.711824	0.616678	29940/6382	2
R-HSA-5654736	Signaling by FGFR1	2/365	50/10704	0.512584	0.711824	0.616678	2250/2247	2
R-HSA-983231	Factors involved in megakaryocyte development and platelet production	6/365	168/10704	0.512871	0.711824	0.616678	3717/5576/3659/9732/3660/23764	6
R-HSA-141405	Inhibition of the proteolytic activity of APC/C required for the onset of anaphase by mitotic spindle checkpoint components	1/365	21/10704	0.517741	0.712842	0.61756	7324	1
R-HSA-141430	Inactivation of APC/C via direct inhibition of the APC/C complex	1/365	21/10704	0.517741	0.712842	0.61756	7324	1
R-HSA-164938	Nef-mediates down modulation of cell surface receptors by recruiting them to clathrin adapters	1/365	21/10704	0.517741	0.712842	0.61756	3105	1
R-HSA-389513	CTLA4 inhibitory signaling	1/365	21/10704	0.517741	0.712842	0.61756	4067	1
R-HSA-442982	Ras activation upon Ca2+ influx through NMDA receptor	1/365	21/10704	0.517741	0.712842	0.61756	5924	1
R-HSA-70895	Branched-chain amino acid catabolism	1/365	21/10704	0.517741	0.712842	0.61756	152926	1
R-HSA-500792	GPCR ligand binding	16/365	467/10704	0.529361	0.723961	0.627192	6376/2920/6347/6364/6372/718/79924/133/2921/6374/2919/3627/6373/3576/6288/6352	16
R-HSA-2428928	IRS-related events triggered by IGF1R	2/365	52/10704	0.533724	0.723961	0.627192	2250/2247	2
R-HSA-111931	PKA-mediated phosphorylation of CREB	1/365	22/10704	0.534218	0.723961	0.627192	5576	1
R-HSA-1250196	SHC1 events in ERBB2 signaling	1/365	22/10704	0.534218	0.723961	0.627192	1839	1
R-HSA-140875	Common Pathway of Fibrin Clot Formation	1/365	22/10704	0.534218	0.723961	0.627192	5270	1
R-HSA-2024096	HS-GAG degradation	1/365	22/10704	0.534218	0.723961	0.627192	6382	1
R-HSA-392154	Nitric oxide stimulates guanylate cyclase	1/365	22/10704	0.534218	0.723961	0.627192	10846	1
R-HSA-5205685	PINK1-PRKN Mediated Mitophagy	1/365	22/10704	0.534218	0.723961	0.627192	8878	1
R-HSA-5654712	FRS-mediated FGFR4 signaling	1/365	22/10704	0.534218	0.723961	0.627192	2247	1
R-HSA-71403	Citric acid cycle (TCA cycle)	1/365	22/10704	0.534218	0.723961	0.627192	3418	1
R-HSA-912631	Regulation of signaling by CBL	1/365	22/10704	0.534218	0.723961	0.627192	4067	1
R-HSA-9665686	Signaling by ERBB2 TMD/JMD mutants	1/365	22/10704	0.534218	0.723961	0.627192	1839	1
R-HSA-5610787	Hedgehog 'off' state	4/365	113/10704	0.541236	0.732511	0.634599	5685/5576/5696/5698	4
R-HSA-2428924	IGF1R signaling cascade	2/365	53/10704	0.544057	0.735365	0.637072	2250/2247	2
R-HSA-140837	Intrinsic Pathway of Fibrin Clot Formation	1/365	23/10704	0.550134	0.739712	0.640838	5270	1
R-HSA-2173795	Downregulation of SMAD2/3:SMAD4 transcriptional activity	1/365	23/10704	0.550134	0.739712	0.640838	4088	1
R-HSA-389948	PD-1 signaling	1/365	23/10704	0.550134	0.739712	0.640838	80380	1
R-HSA-73980	RNA Polymerase III Transcription Termination	1/365	23/10704	0.550134	0.739712	0.640838	4774	1
R-HSA-2404192	Signaling by Type 1 Insulin-like Growth Factor 1 Receptor (IGF1R)	2/365	54/10704	0.554229	0.744251	0.64477	2250/2247	2
R-HSA-71406	Pyruvate metabolism and Citric Acid (TCA) cycle	2/365	55/10704	0.56424	0.752554	0.651963	5166/3418	2
R-HSA-156584	Cytosolic sulfonation of small molecules	1/365	24/10704	0.565507	0.752554	0.651963	1836	1
R-HSA-166208	mTORC1-mediated signalling	1/365	24/10704	0.565507	0.752554	0.651963	29904	1
R-HSA-174048	APC/C:Cdc20 mediated degradation of Cyclin B	1/365	24/10704	0.565507	0.752554	0.651963	7324	1
R-HSA-379716	Cytosolic tRNA aminoacylation	1/365	24/10704	0.565507	0.752554	0.651963	7453	1
R-HSA-9620244	Long-term potentiation	1/365	24/10704	0.565507	0.752554	0.651963	4900	1
R-HSA-9634638	Estrogen-dependent nuclear events downstream of ESR-membrane signaling	1/365	24/10704	0.565507	0.752554	0.651963	1839	1
R-HSA-1187000	Fertilization	1/365	25/10704	0.580357	0.766397	0.663956	2683	1
R-HSA-1643713	Signaling by EGFR in Cancer	1/365	25/10704	0.580357	0.766397	0.663956	1839	1
R-HSA-2029485	Role of phospholipids in phagocytosis	1/365	25/10704	0.580357	0.766397	0.663956	5337	1
R-HSA-9013508	NOTCH3 Intracellular Domain Regulates Transcription	1/365	25/10704	0.580357	0.766397	0.663956	6772	1
R-HSA-937041	IKK complex recruitment mediated by RIP1	1/365	25/10704	0.580357	0.766397	0.663956	330	1
R-HSA-9664565	Signaling by ERBB2 KD Mutants	1/365	25/10704	0.580357	0.766397	0.663956	1839	1
R-HSA-418346	Platelet homeostasis	3/365	88/10704	0.581779	0.767295	0.664734	5027/10846/5025	3
R-HSA-8957322	Metabolism of steroids	5/365	151/10704	0.590018	0.77717	0.673289	5641/3157/85441/4047/3638	5
R-HSA-3108232	SUMO E3 ligases SUMOylate target proteins	6/365	182/10704	0.591658	0.777395	0.673484	4791/4792/5371/4929/84733/9641	6
R-HSA-1227990	Signaling by ERBB2 in Cancer	1/365	26/10704	0.5947	0.777395	0.673484	1839	1
R-HSA-179409	APC-Cdc20 mediated degradation of Nek2A	1/365	26/10704	0.5947	0.777395	0.673484	7324	1
R-HSA-1971475	A tetrasaccharide linker sequence is required for GAG synthesis	1/365	26/10704	0.5947	0.777395	0.673484	6382	1
R-HSA-425410	Metal ion SLC transporters	1/365	26/10704	0.5947	0.777395	0.673484	4891	1
R-HSA-5693554	Resolution of D-loop Structures through Synthesis-Dependent Strand Annealing (SDSA)	1/365	26/10704	0.5947	0.777395	0.673484	4683	1
R-HSA-8866654	E3 ubiquitin ligases ubiquitinate target proteins	2/365	59/10704	0.602658	0.786804	0.681635	7324/3105	2
R-HSA-5654716	Downstream signaling of activated FGFR4	1/365	27/10704	0.608554	0.793499	0.687435	2247	1
R-HSA-2029482	Regulation of actin dynamics for phagocytic cup formation	2/365	61/10704	0.620888	0.802848	0.695535	4651/10458	2
R-HSA-1614635	Sulfur amino acid metabolism	1/365	28/10704	0.621936	0.802848	0.695535	58472	1
R-HSA-164952	The role of Nef in HIV-1 replication and disease pathogenesis	1/365	28/10704	0.621936	0.802848	0.695535	3105	1
R-HSA-201451	Signaling by BMP	1/365	28/10704	0.621936	0.802848	0.695535	4091	1
R-HSA-3295583	TRP channels	1/365	28/10704	0.621936	0.802848	0.695535	197259	1
R-HSA-350054	Notch-HLH transcription pathway	1/365	28/10704	0.621936	0.802848	0.695535	9734	1
R-HSA-9619665	EGR2 and SOX10-mediated initiation of Schwann cell myelination	1/365	28/10704	0.621936	0.802848	0.695535	79966	1
R-HSA-9683701	Translation of structural proteins	1/365	28/10704	0.621936	0.802848	0.695535	54625	1
R-HSA-2990846	SUMOylation	6/365	188/10704	0.623321	0.803633	0.696215	4791/4792/5371/4929/84733/9641	6
R-HSA-4086398	Ca2+ pathway	2/365	62/10704	0.629759	0.810922	0.70253	5530/4343	2
R-HSA-1592230	Mitochondrial biogenesis	3/365	95/10704	0.633813	0.812434	0.703839	6648/85441/3418	3
R-HSA-186763	Downstream signal transduction	1/365	29/10704	0.634861	0.812434	0.703839	6772	1
R-HSA-390918	Peroxisomal lipid metabolism	1/365	29/10704	0.634861	0.812434	0.703839	55825	1
R-HSA-5205647	Mitophagy	1/365	29/10704	0.634861	0.812434	0.703839	8878	1
R-HSA-5683826	Surfactant metabolism	1/365	29/10704	0.634861	0.812434	0.703839	21	1
R-HSA-4090294	SUMOylation of intracellular receptors	1/365	30/10704	0.647346	0.824944	0.714677	4929	1
R-HSA-6804758	Regulation of TP53 Activity through Acetylation	1/365	30/10704	0.647346	0.824944	0.714677	5371	1
R-HSA-8866652	Synthesis of active ubiquitin: roles of E1 and E2 enzymes	1/365	30/10704	0.647346	0.824944	0.714677	7324	1
R-HSA-8936459	RUNX1 regulates genes involved in megakaryocyte differentiation and platelet function	3/365	97/10704	0.647828	0.824944	0.714677	10398/7057/4343	3
R-HSA-8873719	RAB geranylgeranylation	2/365	65/10704	0.655401	0.833527	0.722113	51762/115273	2
R-HSA-2022928	HS-GAG biosynthesis	1/365	31/10704	0.659405	0.833527	0.722113	6382	1
R-HSA-5339562	Uptake and actions of bacterial toxins	1/365	31/10704	0.659405	0.833527	0.722113	1839	1
R-HSA-5654733	Negative regulation of FGFR4 signaling	1/365	31/10704	0.659405	0.833527	0.722113	2247	1
R-HSA-70268	Pyruvate metabolism	1/365	31/10704	0.659405	0.833527	0.722113	5166	1
R-HSA-8963899	Plasma lipoprotein remodeling	1/365	31/10704	0.659405	0.833527	0.722113	9388	1
R-HSA-2871796	FCERI mediated MAPK activation	1/365	32/10704	0.671053	0.843097	0.730404	4067	1
R-HSA-456926	Thrombin signalling through proteinase activated receptors (PARs)	1/365	32/10704	0.671053	0.843097	0.730404	409	1
R-HSA-69190	DNA strand elongation	1/365	32/10704	0.671053	0.843097	0.730404	4175	1
R-HSA-8941326	RUNX2 regulates bone development	1/365	32/10704	0.671053	0.843097	0.730404	4091	1
R-HSA-983695	Antigen activates B Cell Receptor (BCR) leading to generation of second messengers	1/365	32/10704	0.671053	0.843097	0.730404	4067	1
R-HSA-2219528	PI3K/AKT Signaling in Cancer	3/365	101/10704	0.674706	0.846657	0.733488	1839/2250/2247	3
R-HSA-163359	Glucagon signaling in metabolic regulation	1/365	33/10704	0.682303	0.850002	0.736386	5576	1
R-HSA-389356	CD28 co-stimulation	1/365	33/10704	0.682303	0.850002	0.736386	4067	1
R-HSA-5693568	Resolution of D-loop Structures through Holliday Junction Intermediates	1/365	33/10704	0.682303	0.850002	0.736386	4683	1
R-HSA-5694530	Cargo concentration in the ER	1/365	33/10704	0.682303	0.850002	0.736386	1075	1
R-HSA-68962	Activation of the pre-replicative complex	1/365	33/10704	0.682303	0.850002	0.736386	4175	1
R-HSA-9022692	Regulation of MECP2 expression and activity	1/365	33/10704	0.682303	0.850002	0.736386	4343	1
R-HSA-69481	G2/M Checkpoints	5/365	168/10704	0.683353	0.850286	0.736631	5685/4175/4683/5696/5698	5
R-HSA-388841	Costimulation by the CD28 family	2/365	69/10704	0.687363	0.854247	0.740063	80380/4067	2
R-HSA-187687	Signalling to ERKs	1/365	34/10704	0.69317	0.859398	0.744526	5898	1
R-HSA-5693537	Resolution of D-Loop Structures	1/365	34/10704	0.69317	0.859398	0.744526	4683	1
R-HSA-195721	Signaling by WNT	10/365	332/10704	0.701129	0.868225	0.752173	864/5685/7089/5530/409/4343/64321/4919/5696/5698	10
R-HSA-3214841	PKMTs methylate histone lysines	2/365	71/10704	0.702412	0.868772	0.752647	4791/4790	2
R-HSA-114604	GPVI-mediated activation cascade	1/365	35/10704	0.703666	0.869284	0.753091	4067	1
R-HSA-1222556	ROS and RNS production in phagocytes	1/365	36/10704	0.713804	0.874495	0.757605	155066	1
R-HSA-156590	Glutathione conjugation	1/365	36/10704	0.713804	0.874495	0.757605	55748	1
R-HSA-190861	Gap junction assembly	1/365	36/10704	0.713804	0.874495	0.757605	2697	1
R-HSA-5579029	Metabolic disorders of biological oxidation enzymes	1/365	36/10704	0.713804	0.874495	0.757605	4128	1
R-HSA-5663213	RHO GTPases Activate WASPs and WAVEs	1/365	36/10704	0.713804	0.874495	0.757605	10458	1
R-HSA-5673000	RAF activation	1/365	36/10704	0.713804	0.874495	0.757605	3717	1
R-HSA-6802948	Signaling by high-kinase activity BRAF mutants	1/365	36/10704	0.713804	0.874495	0.757605	409	1
R-HSA-5654738	Signaling by FGFR2	2/365	73/10704	0.716854	0.877192	0.759941	2250/2247	2
R-HSA-163685	Integration of energy metabolism	3/365	108/10704	0.718049	0.877616	0.760308	5576/773/4082	3
R-HSA-111933	Calmodulin induced events	1/365	37/10704	0.723596	0.879199	0.76168	5576	1
R-HSA-111997	CaM pathway	1/365	37/10704	0.723596	0.879199	0.76168	5576	1
R-HSA-176187	Activation of ATR in response to replication stress	1/365	37/10704	0.723596	0.879199	0.76168	4175	1
R-HSA-5685938	HDR through Single Strand Annealing (SSA)	1/365	37/10704	0.723596	0.879199	0.76168	4683	1
R-HSA-75105	Fatty acyl-CoA biosynthesis	1/365	37/10704	0.723596	0.879199	0.76168	79966	1
R-HSA-977225	Amyloid fiber formation	3/365	110/10704	0.72958	0.885429	0.767078	23555/9246/6288	3
R-HSA-111465	Apoptotic cleavage of cellular proteins	1/365	38/10704	0.733054	0.886524	0.768026	1832	1
R-HSA-3232142	SUMOylation of ubiquitinylation proteins	1/365	38/10704	0.733054	0.886524	0.768026	5371	1
R-HSA-8939243	RUNX1 interacts with co-factors whose precise effect on RUNX1 targets is not known	1/365	38/10704	0.733054	0.886524	0.768026	84733	1
R-HSA-111996	Ca-dependent events	1/365	39/10704	0.742189	0.893392	0.773976	5576	1
R-HSA-140877	Formation of Fibrin Clot (Clotting Cascade)	1/365	39/10704	0.742189	0.893392	0.773976	5270	1
R-HSA-5693616	Presynaptic phase of homologous DNA pairing and strand exchange	1/365	39/10704	0.742189	0.893392	0.773976	4683	1
R-HSA-73933	Resolution of Abasic Sites (AP sites)	1/365	39/10704	0.742189	0.893392	0.773976	4913	1
R-HSA-3108214	SUMOylation of DNA damage response and repair proteins	2/365	77/10704	0.743976	0.894501	0.774937	5371/84733	2
R-HSA-1461957	Beta defensins	1/365	40/10704	0.751013	0.898781	0.778645	7097	1
R-HSA-168276	NS1 Mediated Effects on Host Pathways	1/365	40/10704	0.751013	0.898781	0.778645	9636	1
R-HSA-5674135	MAP2K and MAPK activation	1/365	40/10704	0.751013	0.898781	0.778645	409	1
R-HSA-8853659	RET signaling	1/365	40/10704	0.751013	0.898781	0.778645	2887	1
R-HSA-8852135	Protein ubiquitination	2/365	79/10704	0.756684	0.90375	0.78295	7324/3105	2
R-HSA-165159	MTOR signalling	1/365	41/10704	0.759535	0.90375	0.78295	29904	1
R-HSA-5654743	Signaling by FGFR4	1/365	41/10704	0.759535	0.90375	0.78295	2247	1
R-HSA-74158	RNA Polymerase III Transcription	1/365	41/10704	0.759535	0.90375	0.78295	4774	1
R-HSA-749476	RNA Polymerase III Abortive And Retractive Initiation	1/365	41/10704	0.759535	0.90375	0.78295	4774	1
R-HSA-2559586	DNA Damage/Telomere Stress Induced Senescence	2/365	80/10704	0.762832	0.90559	0.784543	4683/8091	2
R-HSA-416482	G alpha (12/13) signalling events	2/365	80/10704	0.762832	0.90559	0.784543	5924/55701	2
R-HSA-379724	tRNA Aminoacylation	1/365	42/10704	0.767766	0.908318	0.786907	7453	1
R-HSA-381676	Glucagon-like Peptide-1 (GLP1) regulates insulin secretion	1/365	42/10704	0.767766	0.908318	0.786907	5576	1
R-HSA-5693579	Homologous DNA Pairing and Strand Exchange	1/365	42/10704	0.767766	0.908318	0.786907	4683	1
R-HSA-1489509	DAG and IP3 signaling	1/365	43/10704	0.775716	0.914585	0.792336	5576	1
R-HSA-432040	Vasopressin regulates renal water homeostasis via Aquaporins	1/365	43/10704	0.775716	0.914585	0.792336	5576	1
R-HSA-5362517	Signaling by Retinoic Acid	1/365	43/10704	0.775716	0.914585	0.792336	5166	1
R-HSA-9694635	Translation of structural proteins	1/365	44/10704	0.783395	0.922586	0.799268	54625	1
R-HSA-2467813	Separation of Sister Chromatids	5/365	191/10704	0.785113	0.923558	0.80011	5685/79019/7324/5696/5698	5
R-HSA-1483255	PI Metabolism	2/365	84/10704	0.786096	0.923662	0.8002	57664/25816	2
R-HSA-2172127	DAP12 interactions	1/365	45/10704	0.790812	0.927097	0.803175	3106	1
R-HSA-3899300	SUMOylation of transcription cofactors	1/365	45/10704	0.790812	0.927097	0.803175	84733	1
R-HSA-2132295	MHC class II antigen presentation	3/365	123/10704	0.79569	0.93176	0.807215	5641/1075/1520	3
R-HSA-190236	Signaling by FGFR	2/365	87/10704	0.802205	0.93723	0.811954	2250/2247	2
R-HSA-69275	G2/M Transition	5/365	196/10704	0.803513	0.93723	0.811954	5685/10133/22822/5696/5698	5
R-HSA-2559580	Oxidative Stress Induced Senescence	3/365	125/10704	0.804566	0.93723	0.811954	1870/4343/84733	3
R-HSA-437239	Recycling pathway of L1	1/365	47/10704	0.804894	0.93723	0.811954	6196	1
R-HSA-4570464	SUMOylation of RNA binding proteins	1/365	47/10704	0.804894	0.93723	0.811954	84733	1
R-HSA-453274	Mitotic G2-G2/M phases	5/365	198/10704	0.810516	0.942715	0.816706	5685/10133/22822/5696/5698	5
R-HSA-201681	TCF dependent signaling in response to WNT	6/365	233/10704	0.811453	0.942715	0.816706	864/5685/7089/64321/5696/5698	6
R-HSA-428157	Sphingolipid metabolism	2/365	89/10704	0.812339	0.942715	0.816706	25865/8613	2
R-HSA-2980736	Peptide hormone metabolism	2/365	90/10704	0.817231	0.947328	0.820703	3624/9314	2
R-HSA-201722	Formation of the beta-catenin:TCF transactivating complex	2/365	91/10704	0.822008	0.951799	0.824576	864/7089	2
R-HSA-1461973	Defensins	1/365	50/10704	0.824264	0.952278	0.824991	7097	1
R-HSA-373752	Netrin-1 signaling	1/365	50/10704	0.824264	0.952278	0.824991	4651	1
R-HSA-8939236	RUNX1 regulates transcription of genes involved in differentiation of HSCs	3/365	130/10704	0.825347	0.952465	0.825153	5685/5696/5698	3
R-HSA-71291	Metabolism of amino acids and derivatives	10/365	374/10704	0.826583	0.952828	0.825467	5685/54498/259307/6303/58472/152926/883/5696/1734/5698	10
R-HSA-112310	Neurotransmitter release cycle	1/365	51/10704	0.830284	0.954965	0.827319	4128	1
R-HSA-9678108	SARS-CoV-1 Infection	1/365	51/10704	0.830284	0.954965	0.827319	54625	1
R-HSA-381070	IRE1alpha activates chaperones	1/365	52/10704	0.836099	0.957394	0.829423	2081	1
R-HSA-383280	Nuclear Receptor transcription pathway	1/365	52/10704	0.836099	0.957394	0.829423	4929	1
R-HSA-445717	Aquaporin-mediated transport	1/365	52/10704	0.836099	0.957394	0.829423	5576	1
R-HSA-75153	Apoptotic execution phase	1/365	52/10704	0.836099	0.957394	0.829423	1832	1
R-HSA-373080	Class B/2 (Secretin family receptors)	2/365	95/10704	0.840017	0.960815	0.832387	79924/133	2
R-HSA-1660499	Synthesis of PIPs at the plasma membrane	1/365	53/10704	0.841715	0.961695	0.833149	57664	1
R-HSA-112043	PLC beta mediated events	1/365	55/10704	0.852379	0.967516	0.838192	5576	1
R-HSA-1638091	Heparan sulfate/heparin (HS-GAG) metabolism	1/365	55/10704	0.852379	0.967516	0.838192	6382	1
R-HSA-3371497	HSP90 chaperone cycle for steroid hormone receptors (SHR)	1/365	55/10704	0.852379	0.967516	0.838192	3301	1
R-HSA-429914	Deadenylation-dependent mRNA decay	1/365	55/10704	0.852379	0.967516	0.838192	54464	1
R-HSA-9639288	Amino acids regulate mTORC1	1/365	55/10704	0.852379	0.967516	0.838192	155066	1
R-HSA-5619102	SLC transporter disorders	2/365	98/10704	0.852424	0.967516	0.838192	4891/1836	2
R-HSA-112040	G-protein mediated events	1/365	56/10704	0.857438	0.971075	0.841275	5576	1
R-HSA-432722	Golgi Associated Vesicle Biogenesis	1/365	56/10704	0.857438	0.971075	0.841275	7037	1
R-HSA-72187	mRNA 3'-end processing	1/365	58/10704	0.867045	0.98088	0.84977	84248	1
R-HSA-1474165	Reproduction	3/365	143/10704	0.870735	0.983884	0.852372	2683/4683/23345	3
R-HSA-2142753	Arachidonic acid metabolism	1/365	59/10704	0.871603	0.983884	0.852372	9536	1
R-HSA-2187338	Visual phototransduction	2/365	104/10704	0.874648	0.986244	0.854417	6382/3949	2
R-HSA-69620	Cell Cycle Checkpoints	7/365	294/10704	0.879201	0.986266	0.854436	5685/4175/79019/4683/7324/5696/5698	7
R-HSA-110328	Recognition and association of DNA glycosylase with site containing an affected pyrimidine	1/365	61/10704	0.880258	0.986266	0.854436	4913	1
R-HSA-110329	Cleavage of the damaged pyrimidine	1/365	61/10704	0.880258	0.986266	0.854436	4913	1
R-HSA-73928	Depyrimidination	1/365	61/10704	0.880258	0.986266	0.854436	4913	1
R-HSA-8943724	Regulation of PTEN gene transcription	1/365	61/10704	0.880258	0.986266	0.854436	84733	1
R-HSA-71387	Metabolism of carbohydrates	7/365	295/10704	0.881284	0.986266	0.854436	960/2683/29940/6382/1836/9334/11041	7
R-HSA-211945	Phase I - Functionalization of compounds	2/365	106/10704	0.881344	0.986266	0.854436	54498/4128	2
R-HSA-8986944	Transcriptional Regulation by MECP2	1/365	62/10704	0.884364	0.987734	0.855708	4343	1
R-HSA-156580	Phase II - Conjugation of compounds	2/365	107/10704	0.884567	0.987734	0.855708	55748/1836	2
R-HSA-73929	Base-Excision Repair, AP Site Formation	1/365	63/10704	0.88833	0.989799	0.857497	4913	1
R-HSA-9033241	Peroxisomal protein import	1/365	63/10704	0.88833	0.989799	0.857497	55825	1
R-HSA-1912422	Pre-NOTCH Expression and Processing	2/365	109/10704	0.890771	0.989801	0.857498	2683/4343	2
R-HSA-2672351	Stimuli-sensing channels	2/365	109/10704	0.890771	0.989801	0.857498	1831/197259	2
R-HSA-1268020	Mitochondrial protein import	1/365	64/10704	0.892161	0.989801	0.857498	150274	1
R-HSA-1442490	Collagen degradation	1/365	64/10704	0.892161	0.989801	0.857498	6868	1
R-HSA-69618	Mitotic Spindle Checkpoint	2/365	113/10704	0.902263	0.997195	0.863904	79019/7324	2
R-HSA-5685942	HDR through Homologous Recombination (HRR)	1/365	67/10704	0.902884	0.997195	0.863904	4683	1
R-HSA-73856	RNA Polymerase II Transcription Termination	1/365	67/10704	0.902884	0.997195	0.863904	84248	1
R-HSA-112315	Transmission across Chemical Synapses	6/365	270/10704	0.903203	0.997195	0.863904	6196/5924/5576/773/4900/4128	6
R-HSA-162906	HIV Infection	5/365	234/10704	0.905607	0.997195	0.863904	5685/5696/3105/60489/5698	5
R-HSA-204005	COPII-mediated vesicle transport	1/365	68/10704	0.906216	0.997195	0.863904	1075	1
R-HSA-9694516	SARS-CoV-2 Infection	1/365	68/10704	0.906216	0.997195	0.863904	54625	1
R-HSA-397014	Muscle contraction	4/365	197/10704	0.908226	0.997195	0.863904	4638/10580/10398/60598	4
R-HSA-68882	Mitotic Anaphase	5/365	236/10704	0.909393	0.997195	0.863904	5685/79019/7324/5696/5698	5
R-HSA-3371453	Regulation of HSF1-mediated heat shock response	1/365	69/10704	0.909434	0.997195	0.863904	573	1
R-HSA-5693571	Nonhomologous End-Joining (NHEJ)	1/365	69/10704	0.909434	0.997195	0.863904	4683	1
R-HSA-2555396	Mitotic Metaphase and Anaphase	5/365	237/10704	0.911236	0.998112	0.864699	5685/79019/7324/5696/5698	5
R-HSA-9609646	HCMV Infection	3/365	160/10704	0.914234	0.999653	0.866034	4790/5371/1052	3
R-HSA-1500620	Meiosis	2/365	118/10704	0.915044	0.999653	0.866034	4683/23345	2
R-HSA-4551638	SUMOylation of chromatin organization proteins	1/365	71/10704	0.915545	0.999653	0.866034	84733	1
R-HSA-373760	L1CAM interactions	2/365	119/10704	0.917405	0.999653	0.866034	6196/3673	2
R-HSA-1445148	Translocation of SLC2A4 (GLUT4) to the plasma membrane	1/365	72/10704	0.918444	0.999653	0.866034	5898	1
R-HSA-199992	trans-Golgi Network Vesicle Budding	1/365	72/10704	0.918444	0.999653	0.866034	7037	1
R-HSA-9609507	Protein localization	3/365	163/10704	0.920364	0.999999	0.866333	150274/11264/55825	3
R-HSA-112314	Neurotransmitter receptors and postsynaptic signal transmission	4/365	205/10704	0.923276	0.999999	0.866333	6196/5924/5576/4900	4
R-HSA-606279	Deposition of new CENPA-containing nucleosomes at the centromere	1/365	74/10704	0.923948	0.999999	0.866333	79019	1
R-HSA-6807505	RNA polymerase II transcribes snRNA genes	1/365	74/10704	0.923948	0.999999	0.866333	5452	1
R-HSA-774815	Nucleosome assembly	1/365	74/10704	0.923948	0.999999	0.866333	79019	1
R-HSA-159236	Transport of Mature mRNA derived from an Intron-Containing Transcript	1/365	75/10704	0.926559	0.999999	0.866333	84248	1
R-HSA-9007101	Rab regulation of trafficking	2/365	124/10704	0.928314	0.999999	0.866333	10133/51762	2
R-HSA-3000178	ECM proteoglycans	1/365	76/10704	0.929081	0.999999	0.866333	3673	1
R-HSA-5693565	Recruitment and ATM-mediated phosphorylation of repair and signaling proteins at DNA double strand breaks	1/365	76/10704	0.929081	0.999999	0.866333	4683	1
R-HSA-5693606	DNA Double Strand Break Response	1/365	77/10704	0.931516	0.999999	0.866333	4683	1
R-HSA-9009391	Extra-nuclear estrogen signaling	1/365	77/10704	0.931516	0.999999	0.866333	1839	1
R-HSA-9010553	Regulation of expression of SLITs and ROBOs	3/365	171/10704	0.934808	0.999999	0.866333	5685/5696/5698	3
R-HSA-1221632	Meiotic synapsis	1/365	79/10704	0.93614	0.999999	0.866333	23345	1
R-HSA-3214858	RMTs methylate histone arginines	1/365	79/10704	0.93614	0.999999	0.866333	3717	1
R-HSA-6809371	Formation of the cornified envelope	2/365	130/10704	0.939611	0.999999	0.866333	1832/144501	2
R-HSA-9663891	Selective autophagy	1/365	81/10704	0.940453	0.999999	0.866333	8878	1
R-HSA-376176	Signaling by ROBO receptors	4/365	218/10704	0.943064	0.999999	0.866333	5685/5576/5696/5698	4
R-HSA-8978868	Fatty acid metabolism	3/365	177/10704	0.944014	0.999999	0.866333	55825/79966/9536	3
R-HSA-211859	Biological oxidations	4/365	220/10704	0.945658	0.999999	0.866333	54498/55748/1836/4128	4
R-HSA-72202	Transport of Mature Transcript to Cytoplasm	1/365	84/10704	0.946383	0.999999	0.866333	84248	1
R-HSA-9609690	HCMV Early Events	2/365	135/10704	0.947716	0.999999	0.866333	4790/5371	2
R-HSA-425366	Transport of bile salts and organic acids, metal ions and amine compounds	1/365	85/10704	0.948226	0.999999	0.866333	4891	1
R-HSA-6794362	Protein-protein interactions at synapses	1/365	86/10704	0.950005	0.999999	0.866333	8496	1
R-HSA-912446	Meiotic recombination	1/365	86/10704	0.950005	0.999999	0.866333	4683	1
R-HSA-5628897	TP53 Regulates Metabolic Genes	1/365	87/10704	0.951724	0.999999	0.866333	4343	1
R-HSA-194840	Rho GTPase cycle	2/365	138/10704	0.95207	0.999999	0.866333	5924/55701	2
R-HSA-2565942	Regulation of PLK1 Activity at G2/M Transition	1/365	88/10704	0.953383	0.999999	0.866333	10133	1
R-HSA-948021	Transport to the Golgi and subsequent modification	3/365	185/10704	0.954422	0.999999	0.866333	2683/1075/9334	3
R-HSA-3371556	Cellular response to heat stress	1/365	89/10704	0.954986	0.999999	0.866333	573	1
R-HSA-983712	Ion channel transport	3/365	186/10704	0.955588	0.999999	0.866333	1831/197259/155066	3
R-HSA-8876198	RAB GEFs exchange GTP for GDP on RABs	1/365	90/10704	0.956534	0.999999	0.866333	51762	1
R-HSA-9616222	Transcriptional regulation of granulopoiesis	1/365	90/10704	0.956534	0.999999	0.866333	5371	1
R-HSA-6804756	Regulation of TP53 Activity through Phosphorylation	1/365	92/10704	0.959472	0.999999	0.866333	4683	1
R-HSA-73884	Base Excision Repair	1/365	92/10704	0.959472	0.999999	0.866333	4913	1
R-HSA-163125	Post-translational modification: synthesis of GPI-anchored proteins	1/365	93/10704	0.960866	0.999999	0.866333	5329	1
R-HSA-1912408	Pre-NOTCH Transcription and Translation	1/365	93/10704	0.960866	0.999999	0.866333	4343	1
R-HSA-5625740	RHO GTPases activate PKNs	1/365	95/10704	0.963512	0.999999	0.866333	10398	1
R-HSA-6803157	Antimicrobial peptides	1/365	95/10704	0.963512	0.999999	0.866333	7097	1
R-HSA-69473	G2/M DNA damage checkpoint	1/365	95/10704	0.963512	0.999999	0.866333	4683	1
R-HSA-141424	Amplification of signal from the kinetochores	1/365	96/10704	0.964768	0.999999	0.866333	79019	1
R-HSA-141444	Amplification of signal from unattached kinetochores via a MAD2 inhibitory signal	1/365	96/10704	0.964768	0.999999	0.866333	79019	1
R-HSA-5693607	Processing of DNA double-strand break ends	1/365	98/10704	0.967151	0.999999	0.866333	4683	1
R-HSA-4420097	VEGFA-VEGFR2 Pathway	1/365	99/10704	0.968281	0.999999	0.866333	10458	1
R-HSA-9633012	Response of EIF2AK4 (GCN2) to amino acid deficiency	1/365	101/10704	0.970427	0.999999	0.866333	467	1
R-HSA-112316	Neuronal System	8/365	410/10704	0.972359	0.999999	0.866333	6196/24145/8496/5924/5576/773/4900/4128	8
R-HSA-5633007	Regulation of TP53 Activity	2/365	160/10704	0.974925	0.999999	0.866333	4683/5371	2
R-HSA-194138	Signaling by VEGF	1/365	108/10704	0.97686	0.999999	0.866333	10458	1
R-HSA-416476	G alpha (q) signalling events	3/365	216/10704	0.979981	0.999999	0.866333	6196/1839/6288	3
R-HSA-9610379	HCMV Late Events	1/365	116/10704	0.98252	0.999999	0.866333	1052	1
R-HSA-9648025	EML4 and NUDC in mitotic spindle formation	1/365	117/10704	0.983123	0.999999	0.866333	79019	1
R-HSA-1428517	The citric acid (TCA) cycle and respiratory electron transport	2/365	176/10704	0.9845	0.999999	0.866333	5166/3418	2
R-HSA-3247509	Chromatin modifying enzymes	4/365	274/10704	0.985548	0.999999	0.866333	4791/79960/3717/4790	4
R-HSA-4839726	Chromatin organization	4/365	274/10704	0.985548	0.999999	0.866333	4791/79960/3717/4790	4
R-HSA-3700989	Transcriptional Regulation by TP53	6/365	365/10704	0.987042	0.999999	0.866333	4683/27113/604/5371/5366/4343	6
R-HSA-2500257	Resolution of Sister Chromatid Cohesion	1/365	126/10704	0.987694	0.999999	0.866333	79019	1
R-HSA-114608	Platelet degranulation	1/365	129/10704	0.988925	0.999999	0.866333	7057	1
R-HSA-5576891	Cardiac conduction	1/365	129/10704	0.988925	0.999999	0.866333	60598	1
R-HSA-5693567	HDR through Homologous Recombination (HRR) or Single Strand Annealing (SSA)	1/365	132/10704	0.990032	0.999999	0.866333	4683	1
R-HSA-76005	Response to elevated platelet cytosolic Ca2+	1/365	134/10704	0.990709	0.999999	0.866333	7057	1
R-HSA-1632852	Macroautophagy	1/365	136/10704	0.991339	0.999999	0.866333	8878	1
R-HSA-5693538	Homology Directed Repair	1/365	138/10704	0.991927	0.999999	0.866333	4683	1
R-HSA-9006931	Signaling by Nuclear Receptors	4/365	299/10704	0.992451	0.999999	0.866333	5166/1839/4343/19	4
R-HSA-5663220	RHO GTPases Activate Formins	1/365	140/10704	0.992475	0.999999	0.866333	79019	1
R-HSA-73886	Chromosome Maintenance	1/365	141/10704	0.992735	0.999999	0.866333	79019	1
R-HSA-3214847	HATs acetylate histones	1/365	142/10704	0.992986	0.999999	0.866333	79960	1
R-HSA-68875	Mitotic Prophase	1/365	142/10704	0.992986	0.999999	0.866333	8548	1
R-HSA-76002	Platelet activation, signaling and aggregation	3/365	263/10704	0.994604	0.999999	0.866333	7057/409/4067	3
R-HSA-9018519	Estrogen-dependent gene expression	1/365	150/10704	0.994707	0.999999	0.866333	4343	1
R-HSA-9612973	Autophagy	1/365	151/10704	0.99489	0.999999	0.866333	8878	1
R-HSA-6805567	Keratinization	2/365	214/10704	0.995184	0.999999	0.866333	1832/144501	2
R-HSA-199977	ER to Golgi Anterograde Transport	1/365	154/10704	0.995402	0.999999	0.866333	1075	1
R-HSA-168255	Influenza Infection	1/365	156/10704	0.995715	0.999999	0.866333	9636	1
R-HSA-68886	M Phase	6/365	418/10704	0.996335	0.999999	0.866333	5685/79019/8548/7324/5696/5698	6
R-HSA-8939211	ESR-mediated signaling	2/365	223/10704	0.996366	0.999999	0.866333	1839/4343	2
R-HSA-195258	RHO GTPase Effectors	4/365	327/10704	0.996433	0.999999	0.866333	4638/79019/10398/10458	4
R-HSA-5693532	DNA Double-Strand Break Repair	1/365	166/10704	0.996987	0.999999	0.866333	4683	1
R-HSA-73894	DNA Repair	4/365	334/10704	0.997053	0.999999	0.866333	4913/4683/9246/9636	4
R-HSA-1852241	Organelle biogenesis and maintenance	3/365	296/10704	0.997927	0.999999	0.866333	6648/85441/3418	3
R-HSA-72203	Processing of Capped Intron-Containing Pre-mRNA	2/365	244/10704	0.998127	0.999999	0.866333	84248/9589	2
R-HSA-446203	Asparagine N-linked glycosylation	3/365	304/10704	0.998362	0.999999	0.866333	2683/1075/9334	3
R-HSA-194315	Signaling by Rho GTPases	6/365	455/10704	0.998551	0.999999	0.866333	4638/79019/10398/5924/55701/10458	6
R-HSA-68877	Mitotic Prometaphase	1/365	204/10704	0.999213	0.999999	0.866333	79019	1
R-HSA-72766	Translation	1/365	291/10704	0.999964	0.999999	0.866333	7453	1
R-HSA-381753	Olfactory Signaling Pathway	1/365	394/10704	0.999999	0.999999	0.866333	64108	1

## Sheet: Reactome_treatment3
ID	Description	GeneRatio	BgRatio	pvalue	p.adjust	qvalue	geneID	Count
R-HSA-449147	Signaling by Interleukins	20/48	461/10704	1.75892e-15	3.72891e-13	2.46248e-13	2920/3383/4792/1440/6347/6648/604/3552/6364/9173/8809/3656/3569/7412/11009/2919/3576/6288/1435/9021	20
R-HSA-6783783	Interleukin-10 signaling	1948-10-01	47/10704	5.54465e-15	5.87733e-13	3.88125e-13	2920/3383/1440/6347/3552/6364/3569/2919/3576/1435	10
R-HSA-380108	Chemokine receptors bind chemokines	1948-10-01	59/10704	6.4708e-14	4.5727e-12	3.01971e-12	6376/2920/6387/6347/6364/6372/2921/6374/2919/3576	10
R-HSA-375276	Peptide ligand-binding receptors	1948-12-01	201/10704	5.3329e-11	2.82644e-09	1.86651e-09	6376/2920/6387/6347/6364/6372/718/2921/6374/2919/3576/6288	12
R-HSA-6785807	Interleukin-4 and Interleukin-13 signaling	1948-09-01	108/10704	9.34348e-10	3.96164e-08	2.61617e-08	3383/6347/604/3552/3569/7412/3576/6288/9021	9
R-HSA-373076	Class A/1 (Rhodopsin-like receptors)	1948-12-01	335/10704	1.83522e-08	6.48443e-07	4.28217e-07	6376/2920/6387/6347/6364/6372/718/2921/6374/2919/3576/6288	12
R-HSA-500792	GPCR ligand binding	13/48	467/10704	8.36199e-08	2.53249e-06	1.6724e-06	6376/10203/2920/6387/6347/6364/6372/718/2921/6374/2919/3576/6288	13
R-HSA-418594	G alpha (i) signalling events	1948-11-01	405/10704	1.26877e-06	3.36224e-05	2.22035e-05	6376/2920/6387/6364/6372/718/2921/6374/2919/3576/6288	11
R-HSA-446652	Interleukin-1 family signaling	1948-06-01	140/10704	3.51211e-05	0.000827297	0.000546328	4792/3552/9173/8809/3656/6288	6
R-HSA-2022090	Assembly of collagen fibrils and other multimeric structures	1948-04-01	61/10704	0.000153989	0.00326457	0.00215585	1303/1520/5339/3914	4
R-HSA-445989	TAK1 activates NFkB by phosphorylation and activation of IKKs complex	1948-03-01	33/10704	0.000420127	0.00809699	0.00534707	4792/3656/6288	3
R-HSA-168898	Toll-like Receptor Cascades	1948-05-01	155/10704	0.000618599	0.0109286	0.00721698	4792/3656/7097/1520/6288	5
R-HSA-1474290	Collagen formation	1948-04-01	90/10704	0.000685574	0.0111801	0.0073831	1303/1520/5339/3914	4
R-HSA-166058	MyD88:MAL(TIRAP) cascade initiated on plasma membrane	1948-04-01	95/10704	0.000840288	0.0117738	0.00777518	4792/3656/7097/6288	4
R-HSA-168188	Toll Like Receptor TLR6:TLR2 Cascade	1948-04-01	95/10704	0.000840288	0.0117738	0.00777518	4792/3656/7097/6288	4
R-HSA-168179	Toll Like Receptor TLR1:TLR2 Cascade	1948-04-01	98/10704	0.000944129	0.0117738	0.00777518	4792/3656/7097/6288	4
R-HSA-181438	Toll Like Receptor 2 (TLR2) Cascade	1948-04-01	98/10704	0.000944129	0.0117738	0.00777518	4792/3656/7097/6288	4
R-HSA-1059683	Interleukin-6 signaling	1948-02-01	11/10704	0.00105547	0.0117768	0.00777716	3569/9021	2
R-HSA-446107	Type I hemidesmosome assembly	1948-02-01	11/10704	0.00105547	0.0117768	0.00777716	5339/3914	2
R-HSA-9020702	Interleukin-1 signaling	1948-04-01	103/10704	0.00113681	0.0120502	0.00795767	4792/3552/3656/6288	4
R-HSA-6798695	Neutrophil degranulation	1948-08-01	480/10704	0.00119507	0.0120645	0.00796713	7130/6590/718/7097/1520/5806/2919/116844	8
R-HSA-1474244	Extracellular matrix organization	1948-06-01	301/10704	0.00213642	0.0205873	0.0135954	3383/1303/7412/1520/5339/3914	6
R-HSA-166016	Toll Like Receptor 4 (TLR4) Cascade	1948-04-01	129/10704	0.00260002	0.0239654	0.0158262	4792/3656/7097/6288	4
R-HSA-168928	DDX58/IFIH1-mediated induction of interferon-alpha/beta	1948-03-01	78/10704	0.00508717	0.0349009	0.0230478	4792/7128/6288	3
R-HSA-449836	Other interleukin signaling	1948-02-01	24/10704	0.00510344	0.0349009	0.0230478	1440/1435	2
R-HSA-5260271	Diseases of Immune System	1948-02-01	24/10704	0.00510344	0.0349009	0.0230478	4792/7097	2
R-HSA-5602358	Diseases associated with the TLR signaling cascade	1948-02-01	24/10704	0.00510344	0.0349009	0.0230478	4792/7097	2
R-HSA-6783589	Interleukin-6 family signaling	1948-02-01	24/10704	0.00510344	0.0349009	0.0230478	3569/9021	2
R-HSA-933542	TRAF6 mediated NF-kB activation	1948-02-01	24/10704	0.00510344	0.0349009	0.0230478	4792/6288	2
R-HSA-9660826	Purinergic signaling in leishmaniasis infection	1948-02-01	24/10704	0.00510344	0.0349009	0.0230478	3552/718	2
R-HSA-9664424	Cell recruitment (pro-inflammatory response)	1948-02-01	24/10704	0.00510344	0.0349009	0.0230478	3552/718	2
R-HSA-380994	ATF4 activates genes in response to endoplasmic reticulum stress	1948-02-01	27/10704	0.00643498	0.0391405	0.0258475	6347/3576	2
R-HSA-168142	Toll Like Receptor 10 (TLR10) Cascade	1948-03-01	85/10704	0.00646188	0.0391405	0.0258475	4792/3656/6288	3
R-HSA-168176	Toll Like Receptor 5 (TLR5) Cascade	1948-03-01	85/10704	0.00646188	0.0391405	0.0258475	4792/3656/6288	3
R-HSA-975871	MyD88 cascade initiated on plasma membrane	1948-03-01	85/10704	0.00646188	0.0391405	0.0258475	4792/3656/6288	3
R-HSA-446728	Cell junction organization	1948-03-01	91/10704	0.00780057	0.0435189	0.0287389	23562/5339/3914	3
R-HSA-877300	Interferon gamma signaling	1948-03-01	91/10704	0.00780057	0.0435189	0.0287389	3383/7412/9021	3
R-HSA-975138	TRAF6 mediated induction of NFkB and MAP kinases upon TLR7/8 or 9 activation	1948-03-01	91/10704	0.00780057	0.0435189	0.0287389	4792/3656/6288	3
R-HSA-975155	MyD88 dependent cascade initiated on endosome	1948-03-01	92/10704	0.0080384	0.0436959	0.0288558	4792/3656/6288	3
R-HSA-168181	Toll Like Receptor 7/8 (TLR7/8) Cascade	1948-03-01	93/10704	0.00828049	0.0438866	0.0289817	4792/3656/6288	3
R-HSA-168164	Toll Like Receptor 3 (TLR3) Cascade	1948-03-01	94/10704	0.00852685	0.0440901	0.0291161	4792/3656/6288	3
R-HSA-381042	PERK regulates gene expression	1948-02-01	32/10704	0.00896479	0.0445321	0.029408	6347/3576	2
R-HSA-168138	Toll Like Receptor 9 (TLR9) Cascade	1948-03-01	96/10704	0.00903245	0.0445321	0.029408	4792/3656/6288	3
R-HSA-166166	MyD88-independent TLR4 cascade	1948-03-01	99/10704	0.00982329	0.0462786	0.0305614	4792/3656/6288	3
R-HSA-937061	TRIF(TICAM1)-mediated TLR4 signaling	1948-03-01	99/10704	0.00982329	0.0462786	0.0305614	4792/3656/6288	3
R-HSA-168638	NOD1/2 Signaling Pathway	1948-02-01	37/10704	0.0118675	0.0546938	0.0361185	7128/3656	2
R-HSA-8957275	Post-translational protein phosphorylation	1948-03-01	108/10704	0.0124329	0.0560803	0.0370342	718/3569/1435	3
R-HSA-140877	Formation of Fibrin Clot (Clotting Cascade)	1948-02-01	39/10704	0.0131292	0.0579492	0.0382684	7035/5270	2
R-HSA-9014843	Interleukin-33 signaling	1948-01-01	3/10704	0.0133939	0.0579492	0.0382684	9173	1
R-HSA-2559582	Senescence-Associated Secretory Phenotype (SASP)	1948-03-01	112/10704	0.0137086	0.0581243	0.0383839	3552/3569/3576	3
R-HSA-8849474	PTK6 Activates STAT3	1948-01-01	4/10704	0.0178194	0.0740728	0.048916	9021	1
R-HSA-381426	Regulation of Insulin-like Growth Factor (IGF) transport and uptake by Insulin-like Growth Factor Binding Proteins (IGFBPs)	1948-03-01	125/10704	0.0183555	0.0748339	0.0494186	718/3569/1435	3
R-HSA-1500931	Cell-Cell communication	1948-03-01	129/10704	0.019941	0.0797639	0.0526743	23562/5339/3914	3
R-HSA-198933	Immunoregulatory interactions between a Lymphoid and a non-Lymphoid cell	1948-03-01	132/10704	0.0211785	0.0831451	0.0549071	3383/718/7412	3
R-HSA-140834	Extrinsic Pathway of Fibrin Clot Formation	1948-01-01	5/10704	0.0222255	0.0841392	0.0555636	7035	1
R-HSA-173736	Alternative complement activation	1948-01-01	5/10704	0.0222255	0.0841392	0.0555636	718	1
R-HSA-1474228	Degradation of the extracellular matrix	1948-03-01	140/10704	0.0246815	0.091798	0.0606213	1303/1520/3914	3
R-HSA-9658195	Leishmania infection	1948-04-01	252/10704	0.0259788	0.0934373	0.0617039	10203/3552/718/3569	4
R-HSA-168643	Nucleotide-binding domain, leucine rich repeat containing receptor (NLR) signaling pathways	1948-02-01	56/10704	0.0260038	0.0934373	0.0617039	7128/3656	2
R-HSA-3000471	Scavenging by Class B Receptors	1948-01-01	6/10704	0.0266121	0.0940296	0.062095	6288	1
R-HSA-5603029	IkBA variant leads to EDA-ID	1948-01-01	7/10704	0.0309796	0.10593	0.0699538	4792	1
R-HSA-9637628	Modulation by Mtb of host immune system	1948-01-01	7/10704	0.0309796	0.10593	0.0699538	7097	1
R-HSA-9614085	FOXO-mediated transcription	1948-02-01	65/10704	0.0342418	0.11014	0.0727337	6648/604	2
R-HSA-174577	Activation of C3 and C5	1948-01-01	8/10704	0.0353278	0.11014	0.0727337	718	1
R-HSA-444473	Formyl peptide receptors bind formyl peptides and many other ligands	1948-01-01	8/10704	0.0353278	0.11014	0.0727337	6288	1
R-HSA-448706	Interleukin-1 processing	1948-01-01	8/10704	0.0353278	0.11014	0.0727337	3552	1
R-HSA-8939242	RUNX1 regulates transcription of genes involved in differentiation of keratinocytes	1948-01-01	8/10704	0.0353278	0.11014	0.0727337	9021	1
R-HSA-9012546	Interleukin-18 signaling	1948-01-01	8/10704	0.0353278	0.11014	0.0727337	8809	1
R-HSA-112411	MAPK1 (ERK2) activation	1948-01-01	9/10704	0.0396569	0.120104	0.0793138	3569	1
R-HSA-9662834	CD163 mediating an anti-inflammatory response	1948-01-01	9/10704	0.0396569	0.120104	0.0793138	3569	1
R-HSA-110056	MAPK3 (ERK1) activation	1948-01-01	10/10704	0.043967	0.12428	0.0820717	3569	1
R-HSA-419812	Calcitonin-like ligand receptors	1948-01-01	10/10704	0.043967	0.12428	0.0820717	10203	1
R-HSA-5602498	MyD88 deficiency (TLR2/4)	1948-01-01	10/10704	0.043967	0.12428	0.0820717	7097	1
R-HSA-8964058	HDL remodeling	1948-01-01	10/10704	0.043967	0.12428	0.0820717	9388	1
R-HSA-937042	IRAK2 mediated activation of TAK1 complex	1948-01-01	10/10704	0.043967	0.12428	0.0820717	3656	1
R-HSA-1236977	Endosomal/Vacuolar pathway	1948-01-01	11/10704	0.0482581	0.129503	0.0855208	1520	1
R-HSA-2586552	Signaling by Leptin	1948-01-01	11/10704	0.0482581	0.129503	0.0855208	9021	1
R-HSA-4755510	SUMOylation of immune response proteins	1948-01-01	11/10704	0.0482581	0.129503	0.0855208	4792	1
R-HSA-5603041	IRAK4 deficiency (TLR2/4)	1948-01-01	11/10704	0.0482581	0.129503	0.0855208	7097	1
R-HSA-264870	Caspase-mediated cleavage of cytoskeletal proteins	1948-01-01	12/10704	0.0525304	0.139206	0.0919283	5339	1
R-HSA-216083	Integrin cell surface interactions	1948-02-01	85/10704	0.0555623	0.139979	0.092439	3383/7412	2
R-HSA-1679131	Trafficking and processing of endosomal TLR	1948-01-01	13/10704	0.056784	0.139979	0.092439	1520	1
R-HSA-209560	NF-kB is activated and signals survival	1948-01-01	13/10704	0.056784	0.139979	0.092439	4792	1
R-HSA-5357786	TNFR1-induced proapoptotic signaling	1948-01-01	13/10704	0.056784	0.139979	0.092439	7128	1
R-HSA-75205	Dissolution of Fibrin Clot	1948-01-01	13/10704	0.056784	0.139979	0.092439	5270	1
R-HSA-879415	Advanced glycosylation endproduct receptor signaling	1948-01-01	13/10704	0.056784	0.139979	0.092439	6288	1
R-HSA-2559583	Cellular Senescence	1948-03-01	197/10704	0.058064	0.141489	0.0934364	3552/3569/3576	3
R-HSA-913531	Interferon Signaling	1948-03-01	199/10704	0.0594943	0.143327	0.09465	3383/7412/9021	3
R-HSA-6803205	TP53 regulates transcription of several additional cell death genes whose specific roles in p53-dependent apoptosis remain uncertain	1948-01-01	14/10704	0.0610188	0.143733	0.0949181	604	1
R-HSA-877312	Regulation of IFNG signaling	1948-01-01	14/10704	0.0610188	0.143733	0.0949181	9021	1
R-HSA-2214320	Anchoring fibril formation	1948-01-01	15/10704	0.065235	0.151976	0.100361	3914	1
R-HSA-381119	Unfolded Protein Response (UPR)	1948-02-01	94/10704	0.0663395	0.152869	0.100951	6347/3576	2
R-HSA-193639	p75NTR signals via NF-kB	1948-01-01	16/10704	0.0694326	0.154944	0.102322	4792	1
R-HSA-9614657	FOXO-mediated transcription of cell death genes	1948-01-01	16/10704	0.0694326	0.154944	0.102322	604	1
R-HSA-975163	IRAK2 mediated activation of TAK1 complex upon TLR7/8 or 9 stimulation	1948-01-01	16/10704	0.0694326	0.154944	0.102322	3656	1
R-HSA-1236975	Antigen processing-Cross presentation	1948-02-01	98/10704	0.0713372	0.157536	0.104033	7097/1520	2
R-HSA-1810476	RIP-mediated NFkB activation via ZBP1	1948-01-01	17/10704	0.0736118	0.159242	0.10516	4792	1
R-HSA-937072	TRAF6-mediated induction of TAK1 complex within TLR4 complex	1948-01-01	17/10704	0.0736118	0.159242	0.10516	3656	1
R-HSA-6811558	PI5P, PP2A and IER3 Regulate PI3K/AKT Signaling	1948-02-01	103/10704	0.0777518	0.164878	0.108882	9173/8870	2
R-HSA-5676594	TNF receptor superfamily (TNFSF) members mediating non-canonical NF-kB pathway	1948-01-01	18/10704	0.0777726	0.164878	0.108882	4050	1
R-HSA-197264	Nicotinamide salvaging	1948-01-01	19/10704	0.0819151	0.170255	0.112433	10135	1
R-HSA-5686938	Regulation of TLR by endogenous ligand	1948-01-01	19/10704	0.0819151	0.170255	0.112433	7097	1
R-HSA-199418	Negative regulation of the PI3K/AKT network	1948-02-01	110/10704	0.0870254	0.17912	0.118287	9173/8870	2
R-HSA-1606322	ZBP1(DAI) mediated induction of type I IFNs	1948-01-01	21/10704	0.0901456	0.182008	0.120194	4792	1
R-HSA-9008059	Interleukin-37 signaling	1948-01-01	21/10704	0.0901456	0.182008	0.120194	8809	1
R-HSA-140875	Common Pathway of Fibrin Clot Formation	1948-01-01	22/10704	0.0942337	0.184977	0.122155	5270	1
R-HSA-8862803	Deregulated CDK5 triggers multiple neurodegenerative pathways in Alzheimer's disease models	1948-01-01	22/10704	0.0942337	0.184977	0.122155	6648	1
R-HSA-8863678	Neurodegenerative Diseases	1948-01-01	22/10704	0.0942337	0.184977	0.122155	6648	1
R-HSA-112409	RAF-independent MAPK1/3 activation	1948-01-01	23/10704	0.0983038	0.186075	0.12288	3569	1
R-HSA-140837	Intrinsic Pathway of Fibrin Clot Formation	1948-01-01	23/10704	0.0983038	0.186075	0.12288	5270	1
R-HSA-166663	Initial triggering of complement	1948-01-01	23/10704	0.0983038	0.186075	0.12288	718	1
R-HSA-450321	JNK (c-Jun kinases) phosphorylation and activation mediated by activated human TAK1	1948-01-01	23/10704	0.0983038	0.186075	0.12288	3656	1
R-HSA-450302	activated TAK1 mediates p38 MAPK activation	1948-01-01	24/10704	0.102356	0.190346	0.1257	3656	1
R-HSA-982772	Growth hormone receptor signaling	1948-01-01	24/10704	0.102356	0.190346	0.1257	9021	1
R-HSA-8854691	Interleukin-20 family signaling	1948-01-01	25/10704	0.10639	0.196128	0.129519	11009	1
R-HSA-912694	Regulation of IFNA signaling	1948-01-01	26/10704	0.110407	0.201778	0.13325	9021	1
R-HSA-1368108	BMAL1:CLOCK,NPAS2 activates circadian gene expression	1948-01-01	27/10704	0.114406	0.203815	0.134595	10135	1
R-HSA-5621480	Dectin-2 family	1948-01-01	27/10704	0.114406	0.203815	0.134595	26253	1
R-HSA-9635486	Infection with Mycobacterium tuberculosis	1948-01-01	27/10704	0.114406	0.203815	0.134595	7097	1
R-HSA-9660821	ADORA2B mediated anti-inflammatory cytokines production	1948-02-01	134/10704	0.121053	0.210881	0.139261	10203/3569	2
R-HSA-420029	Tight junction interactions	1948-01-01	29/10704	0.122351	0.210881	0.139261	23562	1
R-HSA-9615017	FOXO-mediated transcription of oxidative stress, metabolic and neuronal genes	1948-01-01	29/10704	0.122351	0.210881	0.139261	6648	1
R-HSA-9645723	Diseases of programmed cell death	1948-01-01	29/10704	0.122351	0.210881	0.139261	6648	1
R-HSA-3000157	Laminin interactions	1948-01-01	30/10704	0.126297	0.2125	0.14033	3914	1
R-HSA-5357956	TNFR1-induced NFkappaB signaling pathway	1948-01-01	30/10704	0.126297	0.2125	0.14033	7128	1
R-HSA-8874081	MET activates PTK2 signaling	1948-01-01	30/10704	0.126297	0.2125	0.14033	3914	1
R-HSA-196807	Nicotinate metabolism	1948-01-01	31/10704	0.130226	0.214015	0.141331	10135	1
R-HSA-2122948	Activated NOTCH1 Transmits Signal to the Nucleus	1948-01-01	31/10704	0.130226	0.214015	0.141331	92737	1
R-HSA-8963899	Plasma lipoprotein remodeling	1948-01-01	31/10704	0.130226	0.214015	0.141331	9388	1
R-HSA-73887	Death Receptor Signalling	1948-02-01	141/10704	0.131525	0.214486	0.141642	4792/7128	2
R-HSA-5621481	C-type lectin receptors (CLRs)	1948-02-01	142/10704	0.133038	0.215298	0.142178	4792/26253	2
R-HSA-1251985	Nuclear signaling by ERBB4	1948-01-01	32/10704	0.134138	0.215434	0.142267	6387	1
R-HSA-936440	Negative regulators of DDX58/IFIH1 signaling	1948-01-01	34/10704	0.14191	0.226202	0.149379	7128	1
R-HSA-5357905	Regulation of TNFR1 signaling	1948-01-01	35/10704	0.14577	0.230621	0.152297	7128	1
R-HSA-3299685	Detoxification of Reactive Oxygen Species	1948-01-01	37/10704	0.153439	0.240956	0.159122	6648	1
R-HSA-111465	Apoptotic cleavage of cellular proteins	1948-01-01	38/10704	0.157249	0.24157	0.159528	5339	1
R-HSA-5689896	Ovarian tumor domain proteases	1948-01-01	38/10704	0.157249	0.24157	0.159528	7128	1
R-HSA-8950505	Gene and protein expression by JAK-STAT signaling after Interleukin-12 stimulation	1948-01-01	38/10704	0.157249	0.24157	0.159528	6648	1
R-HSA-8853884	Transcriptional Regulation by VENTX	1948-01-01	39/10704	0.161041	0.245617	0.1622	3569	1
R-HSA-1461957	Beta defensins	1948-01-01	40/10704	0.164817	0.24958	0.164817	7097	1
R-HSA-8875878	MET promotes cell motility	1948-01-01	41/10704	0.168576	0.253462	0.167381	3914	1
R-HSA-2173782	Binding and Uptake of Ligands by Scavenger Receptors	1948-01-01	42/10704	0.172319	0.257265	0.169892	6288	1
R-HSA-9662851	Anti-inflammatory response favouring Leishmania parasite infection	1948-02-01	169/10704	0.175237	0.257988	0.17037	10203/3569	2
R-HSA-9664433	Leishmania parasite growth and survival	1948-02-01	169/10704	0.175237	0.257988	0.17037	10203/3569	2
R-HSA-5633008	TP53 Regulates Transcription of Cell Death Genes	1948-01-01	44/10704	0.179755	0.259239	0.171195	604	1
R-HSA-75893	TNF signaling	1948-01-01	44/10704	0.179755	0.259239	0.171195	7128	1
R-HSA-8948216	Collagen chain trimerization	1948-01-01	44/10704	0.179755	0.259239	0.171195	1303	1
R-HSA-9020591	Interleukin-12 signaling	1948-01-01	47/10704	0.190787	0.271455	0.179263	6648	1
R-HSA-977606	Regulation of Complement cascade	1948-01-01	47/10704	0.190787	0.271455	0.179263	718	1
R-HSA-1461973	Defensins	1948-01-01	50/10704	0.201673	0.285031	0.188228	7097	1
R-HSA-75153	Apoptotic execution phase	1948-01-01	52/10704	0.20885	0.29322	0.193636	5339	1
R-HSA-8848021	Signaling by PTK6	1948-01-01	54/10704	0.215965	0.299245	0.197615	9021	1
R-HSA-9006927	Signaling by Non-Receptor Tyrosine Kinases	1948-01-01	54/10704	0.215965	0.299245	0.197615	9021	1
R-HSA-2151201	Transcriptional activation of mitochondrial biogenesis	1948-01-01	56/10704	0.223016	0.30701	0.202742	6648	1
R-HSA-447115	Interleukin-12 family signaling	1948-01-01	57/10704	0.226519	0.308882	0.203978	6648	1
R-HSA-1236394	Signaling by ERBB4	1948-01-01	58/10704	0.230006	0.308882	0.203978	6387	1
R-HSA-166658	Complement cascade	1948-01-01	58/10704	0.230006	0.308882	0.203978	718	1
R-HSA-983169	Class I MHC mediated antigen processing & presentation	1948-03-01	370/10704	0.230204	0.308882	0.203978	7097/1520/9021	3
R-HSA-3000171	Non-integrin membrane-ECM interactions	1948-01-01	59/10704	0.233478	0.311304	0.205578	3914	1
R-HSA-1834949	Cytosolic sensors of pathogen-associated DNA	1948-01-01	63/10704	0.247212	0.325944	0.215246	4792	1
R-HSA-1442490	Collagen degradation	1948-01-01	64/10704	0.250608	0.325944	0.215246	1303	1
R-HSA-421270	Cell-cell junction organization	1948-01-01	64/10704	0.250608	0.325944	0.215246	23562	1
R-HSA-450294	MAP kinase activation	1948-01-01	64/10704	0.250608	0.325944	0.215246	3656	1
R-HSA-1169091	Activation of NF-kappaB in B cells	1948-01-01	67/10704	0.260705	0.334967	0.221204	4792	1
R-HSA-1650814	Collagen biosynthesis and modifying enzymes	1948-01-01	67/10704	0.260705	0.334967	0.221204	1303	1
R-HSA-174824	Plasma lipoprotein assembly, remodeling, and clearance	1948-01-01	70/10704	0.270669	0.341559	0.225558	9388	1
R-HSA-400253	Circadian Clock	1948-01-01	70/10704	0.270669	0.341559	0.225558	10135	1
R-HSA-909733	Interferon alpha/beta signaling	1948-01-01	70/10704	0.270669	0.341559	0.225558	9021	1
R-HSA-448424	Interleukin-17 signaling	1948-01-01	72/10704	0.277239	0.347779	0.229665	3656	1
R-HSA-1980143	Signaling by NOTCH1	1948-01-01	74/10704	0.283751	0.353854	0.233677	92737	1
R-HSA-6806834	Signaling by MET	1948-01-01	79/10704	0.299779	0.371656	0.245433	3914	1
R-HSA-2871837	FCERI mediated NF-kB activation	1948-01-01	82/10704	0.309227	0.380563	0.251315	4792	1
R-HSA-1168372	Downstream signaling events of B Cell Receptor (BCR)	1948-01-01	83/10704	0.312349	0.380563	0.251315	4792	1
R-HSA-1236974	ER-Phagosome pathway	1948-01-01	83/10704	0.312349	0.380563	0.251315	7097	1
R-HSA-1257604	PIP3 activates AKT signaling	1948-02-01	264/10704	0.332482	0.402778	0.265986	9173/8870	2
R-HSA-1592230	Mitochondrial biogenesis	1948-01-01	95/10704	0.348747	0.415362	0.274295	6648	1
R-HSA-373080	Class B/2 (Secretin family receptors)	1948-01-01	95/10704	0.348747	0.415362	0.274295	10203	1
R-HSA-6803157	Antimicrobial peptides	1948-01-01	95/10704	0.348747	0.415362	0.274295	7097	1
R-HSA-193704	p75 NTR receptor-mediated signalling	1948-01-01	97/10704	0.354627	0.420005	0.277362	4792	1
R-HSA-202424	Downstream TCR signaling	1948-01-01	98/10704	0.357548	0.421112	0.278093	4792	1
R-HSA-5607764	CLEC7A (Dectin-1) signaling	1948-01-01	101/10704	0.366232	0.428957	0.283273	4792	1
R-HSA-5668541	TNFR2 non-canonical NF-kB pathway	1948-01-01	102/10704	0.369101	0.429942	0.283924	4050	1
R-HSA-5688426	Deubiquitination	1948-02-01	297/10704	0.386292	0.447508	0.295524	4792/7128	2
R-HSA-977225	Amyloid fiber formation	1948-01-01	110/10704	0.3916	0.451192	0.297957	6288	1
R-HSA-983705	Signaling by the B Cell Receptor (BCR)	1948-01-01	112/10704	0.397101	0.455056	0.300509	4792	1
R-HSA-9006925	Intracellular signaling by second messengers	1948-02-01	306/10704	0.400676	0.456684	0.301584	9173/8870	2
R-HSA-1989781	PPARA activates gene expression	1948-01-01	117/10704	0.410641	0.46554	0.307432	50486	1
R-HSA-400206	Regulation of lipid metabolism by PPARalpha	1948-01-01	119/10704	0.415974	0.469077	0.309768	50486	1
R-HSA-202403	TCR signaling	1948-01-01	120/10704	0.418622	0.469565	0.31009	4792	1
R-HSA-196849	Metabolism of water-soluble vitamins and cofactors	1948-01-01	123/10704	0.426497	0.473389	0.312615	10135	1
R-HSA-2132295	MHC class II antigen presentation	1948-01-01	123/10704	0.426497	0.473389	0.312615	1520	1
R-HSA-2454202	Fc epsilon receptor (FCERI) signaling	1948-01-01	134/10704	0.454488	0.50183	0.331397	4792	1
R-HSA-202733	Cell surface interactions at the vascular wall	1948-01-01	137/10704	0.461886	0.507357	0.335047	6401	1
R-HSA-9018519	Estrogen-dependent gene expression	1948-01-01	150/10704	0.492828	0.538555	0.355649	6387	1
R-HSA-109581	Apoptosis	1948-01-01	178/10704	0.553674	0.601943	0.397509	5339	1
R-HSA-3108232	SUMO E3 ligases SUMOylate target proteins	1948-01-01	182/10704	0.561761	0.607619	0.401258	4792	1
R-HSA-2990846	SUMOylation	1948-01-01	188/10704	0.573623	0.615233	0.406286	4792	1
R-HSA-196854	Metabolism of vitamins and cofactors	1948-01-01	190/10704	0.577506	0.615233	0.406286	10135	1
R-HSA-5357801	Programmed Cell Death	1948-01-01	190/10704	0.577506	0.615233	0.406286	5339	1
R-HSA-416476	G alpha (q) signalling events	1948-01-01	216/10704	0.624949	0.662446	0.437464	6288	1
R-HSA-376176	Signaling by ROBO receptors	1948-01-01	218/10704	0.628374	0.662763	0.437674	6387	1
R-HSA-5689880	Ub-specific processing proteases	1948-01-01	220/10704	0.631769	0.663045	0.43786	4792	1
R-HSA-8939211	ESR-mediated signaling	1948-01-01	223/10704	0.636804	0.665037	0.439175	6387	1
R-HSA-8951664	Neddylation	1948-01-01	234/10704	0.654696	0.680318	0.449267	9021	1
R-HSA-157118	Signaling by NOTCH	1948-01-01	236/10704	0.657855	0.680318	0.449267	92737	1
R-HSA-8878171	Transcriptional regulation by RUNX1	1948-01-01	239/10704	0.66254	0.681838	0.45027	9021	1
R-HSA-5684996	MAPK1/MAPK3 signaling	1948-01-01	286/10704	0.728246	0.745836	0.492534	3569	1
R-HSA-1852241	Organelle biogenesis and maintenance	1948-01-01	296/10704	0.740516	0.754756	0.498424	6648	1
R-HSA-9006931	Signaling by Nuclear Receptors	1948-01-01	299/10704	0.744089	0.75477	0.498433	6387	1
R-HSA-983168	Antigen processing: Ubiquitination & Proteasome degradation	1948-01-01	309/10704	0.755658	0.762855	0.503772	9021	1
R-HSA-5683057	MAPK family signaling cascades	1948-01-01	325/10704	0.773111	0.776775	0.512964	3569	1
R-HSA-3700989	Transcriptional Regulation by TP53	1948-01-01	365/10704	0.811576	0.811576	0.535946	604	1

## Sheet: Reactome_treatment4
ID	Description	GeneRatio	BgRatio	pvalue	p.adjust	qvalue	geneID	Count
R-HSA-6783783	Interleukin-10 signaling	17/492	47/10704	1.05897e-11	1.25594e-08	1.14592e-08	7133/7132/2920/3383/1440/6347/3552/6364/3553/3569/3557/2919/3627/3576/1435/7124/6352	17
R-HSA-449147	Signaling by Interleukins	48/492	461/10704	7.79374e-08	4.62169e-05	4.21682e-05	7133/9846/5291/7132/25930/4791/2920/4208/3383/4792/8767/4793/1440/6347/4790/51561/6648/604/3552/6364/8809/1026/3553/3911/3656/3569/3557/5519/1848/5451/2308/3570/7412/2919/3575/3627/3576/2353/3726/5771/3725/29110/1435/9021/57162/5696/7124/6352	48
R-HSA-6785807	Interleukin-4 and Interleukin-13 signaling	19/492	108/10704	3.99372e-07	0.000157885	0.000144054	7133/3383/6347/51561/604/3552/1026/3553/3911/3569/5451/2308/3570/7412/3576/2353/3726/9021/7124	19
R-HSA-877300	Interferon gamma signaling	17/492	91/10704	6.77124e-07	0.000200767	0.00018318	4938/3383/9830/2635/2633/3659/6737/8638/115362/3460/2634/115361/7412/5771/9021/5770/7726	17
R-HSA-913531	Interferon Signaling	26/492	199/10704	1.3698e-06	0.000324917	0.000296454	4938/3383/8480/9830/2635/2633/3437/3433/1958/9972/3659/6737/91543/8638/51191/115362/3460/2634/115361/7412/5771/9021/11274/5770/5696/7726	26
R-HSA-166166	MyD88-independent TLR4 cascade	17/492	99/10704	2.31263e-06	0.000391825	0.000357501	330/4791/4208/4792/8767/4793/4790/329/148022/3656/10010/7099/5519/1848/2353/3725/29110	17
R-HSA-937061	TRIF(TICAM1)-mediated TLR4 signaling	17/492	99/10704	2.31263e-06	0.000391825	0.000357501	330/4791/4208/4792/8767/4793/4790/329/148022/3656/10010/7099/5519/1848/2353/3725/29110	17
R-HSA-168164	Toll Like Receptor 3 (TLR3) Cascade	16/492	94/10704	5.15876e-06	0.000764786	0.00069779	330/4791/4208/4792/8767/4793/4790/329/148022/3656/10010/5519/1848/2353/3725/29110	16
R-HSA-166016	Toll Like Receptor 4 (TLR4) Cascade	19/492	129/10704	6.35156e-06	0.000836994	0.000763673	330/4791/4208/4792/8767/4793/4790/329/148022/3656/10010/7099/7097/5519/1848/2353/3725/29110/57162	19
R-HSA-5357905	Regulation of TNFR1 signaling	9/492	35/10704	2.05957e-05	0.00244265	0.00222868	8837/56928/330/7185/7132/1540/329/7128/7124	9
R-HSA-168898	Toll-like Receptor Cascades	20/492	155/10704	2.72733e-05	0.00294056	0.00268297	330/4791/4208/4792/8767/4793/4790/329/148022/3656/10010/7099/7097/5519/1848/1520/2353/3725/29110/57162	20
R-HSA-9614085	FOXO-mediated transcription	12/492	65/10704	3.38067e-05	0.00334123	0.00304854	208/27113/6648/604/1647/1026/9314/3484/2308/10018/1649/10628	12
R-HSA-168643	Nucleotide-binding domain, leucine rich repeat containing receptor (NLR) signaling pathways	11/492	56/10704	3.93004e-05	0.0035854	0.00327132	330/4791/1540/8767/4790/24145/329/7128/3656/6300/10628	11
R-HSA-975138	TRAF6 mediated induction of NFkB and MAP kinases upon TLR7/8 or 9 activation	14/492	91/10704	6.41322e-05	0.00505957	0.00461634	4791/4208/4792/8767/4793/4790/148022/3656/7099/5519/1848/2353/3725/57162	14
R-HSA-380108	Chemokine receptors bind chemokines	11/492	59/10704	6.52022e-05	0.00505957	0.00461634	6376/2920/6347/6364/2921/6374/2919/3627/6373/3576/6352	11
R-HSA-909733	Interferon alpha/beta signaling	12/492	70/10704	7.24504e-05	0.00505957	0.00461634	4938/3437/3433/1958/3659/91543/8638/2634/9021/11274/5770/5696	12
R-HSA-975155	MyD88 dependent cascade initiated on endosome	14/492	92/10704	7.25233e-05	0.00505957	0.00461634	4791/4208/4792/8767/4793/4790/148022/3656/7099/5519/1848/2353/3725/57162	14
R-HSA-73887	Death Receptor Signalling	18/492	141/10704	7.86516e-05	0.00510948	0.00466188	8837/56928/330/355/7185/7132/1540/4792/8767/4790/9828/329/7128/26230/10018/8793/22899/7124	18
R-HSA-168181	Toll Like Receptor 7/8 (TLR7/8) Cascade	14/492	93/10704	8.1855e-05	0.00510948	0.00466188	4791/4208/4792/8767/4793/4790/148022/3656/7099/5519/1848/2353/3725/57162	14
R-HSA-2559583	Cellular Senescence	22/492	197/10704	0.000102594	0.0055901	0.0051004	4683/898/51343/2146/4790/3552/3007/1026/3397/25913/23135/2113/3569/8535/1030/1029/2114/3576/2353/3725/23466/4217	22
R-HSA-166058	MyD88:MAL(TIRAP) cascade initiated on plasma membrane	14/492	95/10704	0.000103695	0.0055901	0.0051004	4791/4208/4792/8767/4793/4790/3656/7099/7097/5519/1848/2353/3725/57162	14
R-HSA-168188	Toll Like Receptor TLR6:TLR2 Cascade	14/492	95/10704	0.000103695	0.0055901	0.0051004	4791/4208/4792/8767/4793/4790/3656/7099/7097/5519/1848/2353/3725/57162	14
R-HSA-168138	Toll Like Receptor 9 (TLR9) Cascade	14/492	96/10704	0.000116396	0.00600199	0.00547621	4791/4208/4792/8767/4793/4790/148022/3656/7099/5519/1848/2353/3725/57162	14
R-HSA-75893	TNF signaling	9/492	44/10704	0.000142979	0.00665503	0.00607205	8837/56928/330/7185/7132/1540/329/7128/7124	9
R-HSA-168179	Toll Like Receptor TLR1:TLR2 Cascade	14/492	98/10704	0.000145894	0.00665503	0.00607205	4791/4208/4792/8767/4793/4790/3656/7099/7097/5519/1848/2353/3725/57162	14
R-HSA-181438	Toll Like Receptor 2 (TLR2) Cascade	14/492	98/10704	0.000145894	0.00665503	0.00607205	4791/4208/4792/8767/4793/4790/3656/7099/7097/5519/1848/2353/3725/57162	14
R-HSA-380994	ATF4 activates genes in response to endoplasmic reticulum stress	7/492	27/10704	0.000165211	0.00725705	0.00662133	6347/5393/3484/1054/467/3576/1649	7
R-HSA-168928	DDX58/IFIH1-mediated induction of interferon-alpha/beta	12/492	78/10704	0.000211811	0.00897172	0.00818579	4791/1540/57506/4792/4793/79132/4790/64135/7128/10010/51191/29110	12
R-HSA-448706	Interleukin-1 processing	4/492	8/10704	0.00026625	0.0108651	0.00991332	4791/4790/3552/3553	4
R-HSA-1606322	ZBP1(DAI) mediated induction of type I IFNs	6/492	21/10704	0.000274834	0.0108651	0.00991332	4791/4792/4793/4790/148022/29110	6
R-HSA-5357956	TNFR1-induced NFkappaB signaling pathway	7/492	30/10704	0.000335978	0.0128539	0.0117279	330/7185/7132/1540/329/7128/7124	7
R-HSA-9648895	Response of EIF2AK1 (HRI) to heme deficiency	5/492	15/10704	0.000411231	0.0150451	0.0137272	23645/57761/1054/467/1649	5
R-HSA-198725	Nuclear Events (kinase and transcription factor activation)	10/492	61/10704	0.000418625	0.0150451	0.0137272	4208/1958/3397/5519/1848/6236/2353/3726/10221/8061	10
R-HSA-168142	Toll Like Receptor 10 (TLR10) Cascade	12/492	85/10704	0.000479416	0.0157941	0.0144105	4791/4208/4792/8767/4793/4790/3656/5519/1848/2353/3725/57162	12
R-HSA-168176	Toll Like Receptor 5 (TLR5) Cascade	12/492	85/10704	0.000479416	0.0157941	0.0144105	4791/4208/4792/8767/4793/4790/3656/5519/1848/2353/3725/57162	12
R-HSA-975871	MyD88 cascade initiated on plasma membrane	12/492	85/10704	0.000479416	0.0157941	0.0144105	4791/4208/4792/8767/4793/4790/3656/5519/1848/2353/3725/57162	12
R-HSA-381042	PERK regulates gene expression	7/492	32/10704	0.000512912	0.0164409	0.0150007	6347/5393/3484/1054/467/3576/1649	7
R-HSA-9614657	FOXO-mediated transcription of cell death genes	5/492	16/10704	0.000575712	0.017532	0.0159962	27113/604/2308/10018/1649	5
R-HSA-5260271	Diseases of Immune System	6/492	24/10704	0.000606082	0.017532	0.0159962	4791/4792/4790/148022/7099/7097	6
R-HSA-5602358	Diseases associated with the TLR signaling cascade	6/492	24/10704	0.000606082	0.017532	0.0159962	4791/4792/4790/148022/7099/7097	6
R-HSA-933542	TRAF6 mediated NF-kB activation	6/492	24/10704	0.000606082	0.017532	0.0159962	4791/57506/4792/4793/4790/64135	6
R-HSA-1810476	RIP-mediated NFkB activation via ZBP1	5/492	17/10704	0.000785028	0.0221677	0.0202258	4791/4792/4793/4790/148022	5
R-HSA-5676594	TNF receptor superfamily (TNFSF) members mediating non-canonical NF-kB pathway	5/492	18/10704	0.00104628	0.0288577	0.0263298	330/10673/329/4049/4050	5
R-HSA-446107	Type I hemidesmosome assembly	4/492	11/10704	0.00112372	0.0302893	0.0276359	3909/3918/5339/3914	4
R-HSA-381119	Unfolded Protein Response (UPR)	12/492	94/10704	0.00119741	0.0315584	0.0287939	55738/55033/6347/5393/3068/3484/1054/467/3576/1649/10106/2081	12
R-HSA-168638	NOD1/2 Signaling Pathway	7/492	37/10704	0.00128601	0.0331566	0.030252	330/1540/8767/329/7128/3656/6300	7
R-HSA-5213460	RIPK1-mediated regulated necrosis	6/492	29/10704	0.00175964	0.0420964	0.0384087	8837/330/355/329/197259/57162	6
R-HSA-5218859	Regulated Necrosis	6/492	29/10704	0.00175964	0.0420964	0.0384087	8837/330/355/329/197259/57162	6
R-HSA-5675482	Regulation of necroptotic cell death	6/492	29/10704	0.00175964	0.0420964	0.0384087	8837/330/355/329/197259/57162	6
R-HSA-9031628	NGF-stimulated transcription	7/492	39/10704	0.00177472	0.0420964	0.0384087	1958/3397/6236/2353/3726/10221/8061	7
R-HSA-446652	Interleukin-1 family signaling	15/492	140/10704	0.00191979	0.044637	0.0407268	25930/4791/4792/8767/4793/4790/3552/8809/3553/3656/3557/5771/29110/57162/5696	15
R-HSA-6807505	RNA polymerase II transcribes snRNA genes	10/492	74/10704	0.0019571	0.044637	0.0407268	6882/905/8178/57508/2959/57117/5451/51585/7702/6884	10
R-HSA-1483152	Hydrolysis of LPE	2/492	2/10704	0.0021086	0.047185	0.0430515	8605/56261	2
R-HSA-1834949	Cytosolic sensors of pathogen-associated DNA	9/492	63/10704	0.00220183	0.0483588	0.0441225	4791/4792/4793/4790/148022/6737/3428/115004/29110	9
R-HSA-5357786	TNFR1-induced proapoptotic signaling	4/492	13/10704	0.00226228	0.0487829	0.0445095	7132/1540/7128/7124	4
R-HSA-1989781	PPARA activates gene expression	13/492	117/10704	0.00273035	0.0578249	0.0527594	57761/6907/1374/80306/50486/54797/11010/26230/27063/8800/6256/4520/7296	13
R-HSA-3700989	Transcriptional Regulation by TP53	29/492	365/10704	0.00285514	0.0581245	0.0530327	355/6882/905/4683/898/208/27113/8178/8649/604/1647/1026/79733/83667/9656/5519/5366/1029/2176/144455/2353/8793/3725/6879/6884/7296/4513/4512/1616	29
R-HSA-5357801	Programmed Cell Death	18/492	190/10704	0.00286183	0.0581245	0.0530327	8837/330/355/1832/208/27113/329/3007/148022/7099/5366/1029/10018/115209/197259/5339/57162/5696	18
R-HSA-5603029	IkBA variant leads to EDA-ID	3/492	7/10704	0.00294053	0.0581245	0.0530327	4791/4792/4790	3
R-HSA-9652817	Signaling by MAPK mutants	3/492	7/10704	0.00294053	0.0581245	0.0530327	80824/1848/1850	3
R-HSA-6804116	TP53 Regulates Transcription of Genes Involved in G1 Cell Cycle Arrest	4/492	14/10704	0.00305325	0.0584056	0.0532893	898/1026/79733/144455	4
R-HSA-877312	Regulation of IFNG signaling	4/492	14/10704	0.00305325	0.0584056	0.0532893	3460/5771/9021/5770	4
R-HSA-400206	Regulation of lipid metabolism by PPARalpha	13/492	119/10704	0.00317023	0.0596808	0.0544527	57761/6907/1374/80306/50486/54797/11010/26230/27063/8800/6256/4520/7296	13
R-HSA-112409	RAF-independent MAPK1/3 activation	5/492	23/10704	0.0033978	0.0629656	0.0574497	80824/3569/1848/3570/1850	5
R-HSA-445989	TAK1 activates NFkB by phosphorylation and activation of IKKs complex	6/492	33/10704	0.00351191	0.0640789	0.0584655	4791/4792/8767/4793/4790/3656	6
R-HSA-844456	The NLRP3 inflammasome	4/492	15/10704	0.00401398	0.0710305	0.0648082	4791/4790/24145/10628	4
R-HSA-936440	Negative regulators of DDX58/IFIH1 signaling	6/492	34/10704	0.00410224	0.0710305	0.0648082	1540/57506/64135/7128/51191/29110	6
R-HSA-9660826	Purinergic signaling in leishmaniasis infection	5/492	24/10704	0.00413247	0.0710305	0.0648082	4791/4790/3552/3553/10628	5
R-HSA-9664424	Cell recruitment (pro-inflammatory response)	5/492	24/10704	0.00413247	0.0710305	0.0648082	4791/4790/3552/3553/10628	5
R-HSA-1834941	STING mediated induction of host immune responses	4/492	16/10704	0.00516007	0.0874263	0.0797677	6737/3428/115004/29110	4
R-HSA-6806664	Metabolism of vitamin K	2/492	3/10704	0.00613272	0.102442	0.0934683	29914/154807	2
R-HSA-187037	Signaling by NTRK1 (TRKA)	12/492	115/10704	0.00649386	0.104158	0.0950335	5291/4208/1958/3397/5519/1848/6236/2353/3726/10221/8061/6300	12
R-HSA-140534	Caspase activation via Death Receptors in the presence of ligand	4/492	17/10704	0.00650623	0.104158	0.0950335	8837/355/148022/7099	4
R-HSA-9617828	FOXO-mediated transcription of cell cycle genes	4/492	17/10704	0.00650623	0.104158	0.0950335	1647/1026/9314/2308	4
R-HSA-111453	BH3-only proteins associate with and inactivate anti-apoptotic BCL-2 members	3/492	9/10704	0.00658671	0.104158	0.0950335	27113/5366/10018	3
R-HSA-1368108	BMAL1:CLOCK,NPAS2 activates circadian gene expression	5/492	27/10704	0.00700812	0.108498	0.0989933	6907/79365/8553/25819/6256	5
R-HSA-5668541	TNFR2 non-canonical NF-kB pathway	11/492	102/10704	0.00704413	0.108498	0.0989933	330/7133/7132/4791/10673/5971/329/5696/4049/4050/7124	11
R-HSA-9020702	Interleukin-1 signaling	11/492	103/10704	0.00757053	0.115111	0.105027	4791/4792/8767/4793/4790/3552/3553/3656/3557/57162/5696	11
R-HSA-936964	Activation of IRF3/IRF7 mediated by TBK1/IKK epsilon	4/492	18/10704	0.00806622	0.121095	0.110487	148022/10010/7099/29110	4
R-HSA-450294	MAP kinase activation	8/492	64/10704	0.00866205	0.128415	0.117166	4208/8767/4790/3656/5519/1848/2353/3725	8
R-HSA-9645723	Diseases of programmed cell death	5/492	29/10704	0.00956129	0.139996	0.127732	994/6648/1029/10018/3725	5
R-HSA-162587	HIV Life Cycle	14/492	152/10704	0.0101946	0.147449	0.134532	6882/905/51510/8480/128866/8731/8178/9972/2959/9397/3981/6879/89853/6884	14
R-HSA-3000157	Laminin interactions	5/492	30/10704	0.0110504	0.156022	0.142354	3909/3918/3911/3908/3914	5
R-HSA-8874081	MET activates PTK2 signaling	5/492	30/10704	0.0110504	0.156022	0.142354	3909/3918/3911/3908/3914	5
R-HSA-162599	Late Phase of HIV Life Cycle	13/492	139/10704	0.0115552	0.160279	0.146238	6882/905/51510/8480/128866/8731/8178/9972/2959/9397/6879/89853/6884	13
R-HSA-622312	Inflammasomes	4/492	20/10704	0.0118773	0.160279	0.146238	4791/4790/24145/10628	4
R-HSA-165158	Activation of AKT2	2/492	4/10704	0.0118925	0.160279	0.146238	57761/208	2
R-HSA-211163	AKT-mediated inactivation of FOXO1A	2/492	4/10704	0.0118925	0.160279	0.146238	208/2308	2
R-HSA-1059683	Interleukin-6 signaling	3/492	11/10704	0.0120796	0.160971	0.14687	3569/3570/9021	3
R-HSA-450282	MAPK targets/ Nuclear events mediated by MAP kinases	5/492	31/10704	0.0126903	0.16723	0.15258	4208/5519/1848/2353/3725	5
R-HSA-9008059	Interleukin-37 signaling	4/492	21/10704	0.0141504	0.184421	0.168266	25930/8809/5771/29110	4
R-HSA-8941326	RUNX2 regulates bone development	5/492	32/10704	0.0144872	0.184736	0.168553	25/3280/4091/367/4086	5
R-HSA-400253	Circadian Clock	8/492	70/10704	0.0145613	0.184736	0.168553	4208/1390/6907/1374/79365/8553/25819/6256	8
R-HSA-2173793	Transcriptional activity of SMAD2/SMAD3:SMAD4 heterotrimer	6/492	44/10704	0.0146418	0.184736	0.168553	905/6498/1030/6497/3726/7050	6
R-HSA-9013973	TICAM1-dependent activation of IRF3/IRF7	3/492	12/10704	0.0155645	0.194311	0.177289	148022/10010/29110	3
R-HSA-2559585	Oncogene Induced Senescence	5/492	33/10704	0.016447	0.201876	0.184191	3397/2113/1030/1029/2114	5
R-HSA-8862803	Deregulated CDK5 triggers multiple neurodegenerative pathways in Alzheimer's disease models	4/492	22/10704	0.0166811	0.201876	0.184191	994/6648/10018/3725	4
R-HSA-8863678	Neurodegenerative Diseases	4/492	22/10704	0.0166811	0.201876	0.184191	994/6648/10018/3725	4
R-HSA-448424	Interleukin-17 signaling	8/492	72/10704	0.0170575	0.203189	0.185389	4208/8767/4790/3656/5519/1848/2353/3725	8
R-HSA-109581	Apoptosis	15/492	178/10704	0.0171323	0.203189	0.185389	8837/355/1832/208/27113/329/3007/148022/7099/5366/1029/10018/115209/5339/5696	15
R-HSA-3000171	Non-integrin membrane-ECM interactions	7/492	59/10704	0.0179341	0.210593	0.192145	3909/3918/5155/6385/3911/3908/3914	7
R-HSA-9006936	Signaling by TGFB family members	10/492	102/10704	0.0186228	0.215052	0.196214	905/23645/10468/6498/4091/1030/6497/4086/3726/7050	10
R-HSA-112303	Electric Transmission Across Gap Junctions	2/492	5/10704	0.0192205	0.215052	0.196214	24145/10052	2
R-HSA-112307	Transmission across Electrical Synapses	2/492	5/10704	0.0192205	0.215052	0.196214	24145/10052	2
R-HSA-8952158	RUNX3 regulates BCL2L11 (BIM) transcription	2/492	5/10704	0.0192205	0.215052	0.196214	864/10018	2
R-HSA-9031525	NR1H2 & NR1H3 regulate gene expression to limit cholesterol uptake	2/492	5/10704	0.0192205	0.215052	0.196214	29116/6256	2
R-HSA-69231	Cyclin D associated events in G1	6/492	47/10704	0.0198546	0.218033	0.198933	25/898/1026/5519/1030/1029	6
R-HSA-69236	G1 Phase	6/492	47/10704	0.0198546	0.218033	0.198933	25/898/1026/5519/1030/1029	6
R-HSA-166520	Signaling by NTRKs	12/492	134/10704	0.0203679	0.221617	0.202203	5291/4208/1958/3397/5519/1848/6236/2353/3726/10221/8061/6300	12
R-HSA-446728	Cell junction organization	9/492	91/10704	0.0236678	0.255182	0.232828	5010/3909/3918/24146/23562/9076/5339/71/3914	9
R-HSA-918233	TRAF3-dependent IRF activation pathway	3/492	14/10704	0.0240558	0.257028	0.234512	57506/64135/29110	3
R-HSA-937041	IKK complex recruitment mediated by RIP1	4/492	25/10704	0.0258938	0.274197	0.250177	330/329/148022/7099	4
R-HSA-1793185	Chondroitin sulfate/dermatan sulfate metabolism	6/492	50/10704	0.0262043	0.275029	0.250936	64132/29940/6385/55501/55454/1464	6
R-HSA-176417	Phosphorylation of Emi1	2/492	6/10704	0.027961	0.283434	0.258605	51343/26271	2
R-HSA-5336415	Uptake and function of diphtheria toxin	2/492	6/10704	0.027961	0.283434	0.258605	1839/7296	2
R-HSA-5626978	TNFR1-mediated ceramide production	2/492	6/10704	0.027961	0.283434	0.258605	7132/7124	2
R-HSA-5660668	CLEC7A/inflammasome pathway	2/492	6/10704	0.027961	0.283434	0.258605	4790/3553	2
R-HSA-3928665	EPH-ephrin mediated repulsion of cells	6/492	51/10704	0.0285886	0.28734	0.262168	1947/1948/1969/1942/71/2050	6
R-HSA-2214320	Anchoring fibril formation	3/492	15/10704	0.0290662	0.289685	0.264308	3909/3918/3914	3
R-HSA-199418	Negative regulation of the PI3K/AKT network	10/492	110/10704	0.0297297	0.293829	0.268089	5291/5155/57761/208/1839/8870/5519/8394/3643/23396	10
R-HSA-383280	Nuclear Receptor transcription pathway	6/492	52/10704	0.0311115	0.304944	0.278231	7421/4929/2063/367/7025/6256	6
R-HSA-72203	Processing of Capped Intron-Containing Pre-mRNA	18/492	244/10704	0.0323922	0.314894	0.287309	9984/3183/8480/8896/9343/9972/6434/5546/10262/81608/9589/10482/51585/1479/22827/11066/23450/54883	18
R-HSA-2559582	Senescence-Associated Secretory Phenotype (SASP)	10/492	112/10704	0.0331144	0.317972	0.290118	51343/4790/3552/1026/3569/1030/1029/3576/2353/3725	10
R-HSA-5357769	Caspase activation via extrinsic apoptotic signalling pathway	4/492	27/10704	0.0334394	0.317972	0.290118	8837/355/148022/7099	4
R-HSA-1169091	Activation of NF-kappaB in B cells	7/492	67/10704	0.0335131	0.317972	0.290118	4792/4793/4790/8915/4794/5966/5696	7
R-HSA-193639	p75NTR signals via NF-kB	3/492	16/10704	0.034583	0.322956	0.294665	4792/8767/4790	3
R-HSA-975163	IRAK2 mediated activation of TAK1 complex upon TLR7/8 or 9 stimulation	3/492	16/10704	0.034583	0.322956	0.294665	148022/3656/7099	3
R-HSA-1257604	PIP3 activates AKT signaling	19/492	264/10704	0.0353898	0.327908	0.299183	5291/5155/57761/208/2146/8649/1839/1958/1026/8870/5519/8535/8394/2308/3643/3725/23466/23396/5696	19
R-HSA-8848021	Signaling by PTK6	6/492	54/10704	0.0365826	0.333746	0.30451	898/1839/1796/2909/9021/5770	6
R-HSA-9006927	Signaling by Non-Receptor Tyrosine Kinases	6/492	54/10704	0.0365826	0.333746	0.30451	898/1839/1796/2909/9021/5770	6
R-HSA-3134963	DEx/H-box helicases activate type I IFN and inflammatory cytokines production	2/492	7/10704	0.0379692	0.338583	0.308923	4791/4790	2
R-HSA-8941855	RUNX3 regulates CDKN1A transcription	2/492	7/10704	0.0379692	0.338583	0.308923	864/1026	2
R-HSA-9033500	TYSND1 cleaves peroxisomal proteins	2/492	7/10704	0.0379692	0.338583	0.308923	5264/219743	2
R-HSA-8875878	MET promotes cell motility	5/492	41/10704	0.03857	0.340456	0.310632	3909/3918/3911/3908/3914	5
R-HSA-381340	Transcriptional regulation of white adipocyte differentiation	8/492	84/10704	0.0387534	0.340456	0.310632	6907/4790/80306/54797/9314/7026/6256/7124	8
R-HSA-450385	Butyrate Response Factor 1 (BRF1) binds and destabilizes mRNA	3/492	17/10704	0.0405995	0.351467	0.320678	5393/677/55802	3
R-HSA-937072	TRAF6-mediated induction of TAK1 complex within TLR4 complex	3/492	17/10704	0.0405995	0.351467	0.320678	148022/3656/7099	3
R-HSA-3108232	SUMO E3 ligases SUMOylate target proteins	14/492	182/10704	0.0409453	0.351893	0.321066	4791/3183/4792/8480/7421/9972/9656/8535/1029/4929/367/56160/6256/1616	14
R-HSA-420029	Tight junction interactions	4/492	29/10704	0.0421364	0.354424	0.323376	5010/24146/23562/9076	4
R-HSA-5669034	TNFs bind their physiological receptors	4/492	29/10704	0.0421364	0.354424	0.323376	7133/7132/10673/4049	4
R-HSA-933541	TRAF6 mediated IRF7 activation	4/492	29/10704	0.0421364	0.354424	0.323376	57506/64135/10010/29110	4
R-HSA-9006925	Intracellular signaling by second messengers	21/492	306/10704	0.0433422	0.361999	0.330288	5291/5155/57761/208/2146/8649/1839/1958/1026/8870/5519/8535/8394/2308/3708/3643/5581/3725/23466/23396/5696	21
R-HSA-3560792	Defective SLC26A2 causes chondrodysplasias	1/492	1/10704	0.0459641	0.363844	0.331971	1836	1
R-HSA-4720475	Defective ALG3 causes ALG3-CDG (CDG-1d)	1/492	1/10704	0.0459641	0.363844	0.331971	10195	1
R-HSA-4755583	Defective DOLK causes DOLK-CDG (CDG-1m)	1/492	1/10704	0.0459641	0.363844	0.331971	22845	1
R-HSA-5263617	Metabolism of ingested MeSeO2H into MeSeH	1/492	1/10704	0.0459641	0.363844	0.331971	7296	1
R-HSA-5619078	Defective SLC35C1 causes congenital disorder of glycosylation 2C (CDG2C)	1/492	1/10704	0.0459641	0.363844	0.331971	55343	1
R-HSA-9646303	Evasion of Oncogene Induced Senescence Due to p14ARF Defects	1/492	1/10704	0.0459641	0.363844	0.331971	1029	1
R-HSA-9646304	Evasion of Oxidative Stress Induced Senescence Due to p14ARF Defects	1/492	1/10704	0.0459641	0.363844	0.331971	1029	1
R-HSA-5675221	Negative regulation of MAPK pathway	5/492	43/10704	0.0460173	0.363844	0.331971	80824/5519/1848/1850/6300	5
R-HSA-114452	Activation of BH3-only proteins	4/492	30/10704	0.0469188	0.365149	0.333162	208/27113/5366/10018	4
R-HSA-4090294	SUMOylation of intracellular receptors	4/492	30/10704	0.0469188	0.365149	0.333162	7421/4929/367/6256	4
R-HSA-1368082	RORA activates gene expression	3/492	18/10704	0.0471061	0.365149	0.333162	6907/1374/6256	3
R-HSA-416550	Sema4D mediated inhibition of cell attachment and migration	2/492	8/10704	0.0491106	0.373253	0.340556	2909/27289	2
R-HSA-75158	TRAIL signaling	2/492	8/10704	0.0491106	0.373253	0.340556	8837/8793	2
R-HSA-8951671	RUNX3 regulates YAP1-mediated transcription	2/492	8/10704	0.0491106	0.373253	0.340556	864/1490	2
R-HSA-167172	Transcription of the HIV genome	7/492	73/10704	0.0498234	0.373253	0.340556	6882/905/8731/8178/2959/6879/6884	7
R-HSA-170834	Signaling by TGF-beta Receptor Complex	7/492	73/10704	0.0498234	0.373253	0.340556	905/23645/6498/1030/6497/3726/7050	7
R-HSA-5633008	TP53 Regulates Transcription of Cell Death Genes	5/492	44/10704	0.0500398	0.373253	0.340556	355/27113/604/5366/8793	5
R-HSA-2990846	SUMOylation	14/492	188/10704	0.0513042	0.380292	0.346978	4791/3183/4792/8480/7421/9972/9656/8535/1029/4929/367/56160/6256/1616	14
R-HSA-3928664	Ephrin signaling	3/492	19/10704	0.0540911	0.396	0.36131	1947/1948/2050	3
R-HSA-77595	Processing of Intronless Pre-mRNAs	3/492	19/10704	0.0540911	0.396	0.36131	81608/51585/1479	3
R-HSA-983169	Class I MHC mediated antigen processing & presentation	24/492	370/10704	0.0557848	0.405894	0.370337	29116/51665/79791/51343/7704/10802/127544/5930/6737/10489/7099/7097/57520/55008/51191/899/1520/6890/10193/9021/140691/55182/9666/5696	24
R-HSA-2173796	SMAD2/SMAD3:SMAD4 heterotrimer regulates transcription	4/492	32/10704	0.0573472	0.414718	0.378389	905/1030/3726/7050	4
R-HSA-1630316	Glycosaminoglycan metabolism	10/492	124/10704	0.0591705	0.424344	0.387171	6482/64132/3340/29940/6385/55501/1836/55454/1464/11041	10
R-HSA-8943724	Regulation of PTEN gene transcription	6/492	61/10704	0.0603816	0.424344	0.387171	2146/8649/1958/8535/3725/23466	6
R-HSA-112411	MAPK1 (ERK2) activation	2/492	9/10704	0.0612603	0.424344	0.387171	3569/3570	2
R-HSA-198693	AKT phosphorylates targets in the nucleus	2/492	9/10704	0.0612603	0.424344	0.387171	208/2308	2
R-HSA-8951936	RUNX3 regulates p14-ARF	2/492	9/10704	0.0612603	0.424344	0.387171	864/6046	2
R-HSA-8983711	OAS antiviral response	2/492	9/10704	0.0612603	0.424344	0.387171	4938/8638	2
R-HSA-168927	TICAM1, RIP1-mediated IKK complex recruitment	3/492	20/10704	0.0615406	0.424344	0.387171	330/329/148022	3
R-HSA-2022870	Chondroitin sulfate biosynthesis	3/492	20/10704	0.0615406	0.424344	0.387171	55501/55454/1464	3
R-HSA-6791312	TP53 Regulates Transcription of Cell Cycle Genes	5/492	48/10704	0.0681298	0.467063	0.426148	898/1647/1026/79733/144455	5
R-HSA-6806834	Signaling by MET	7/492	79/10704	0.0704379	0.476339	0.434611	3909/3918/3911/5771/5770/3908/3914	7
R-HSA-983705	Signaling by the B Cell Receptor (BCR)	9/492	112/10704	0.0723644	0.476339	0.434611	4792/4793/4790/8915/7220/4794/3708/5966/5696	9
R-HSA-162906	HIV Infection	16/492	234/10704	0.0730678	0.476339	0.434611	6882/905/51510/8480/128866/8731/8178/9972/2959/130340/9397/3981/6879/89853/6884/5696	16
R-HSA-1500931	Cell-Cell communication	10/492	129/10704	0.073138	0.476339	0.434611	5010/5291/3909/3918/24146/23562/9076/5339/71/3914	10
R-HSA-8878159	Transcriptional regulation by RUNX3	8/492	96/10704	0.0738831	0.476339	0.434611	864/3280/1490/1026/1029/10018/6046/5696	8
R-HSA-110056	MAPK3 (ERK1) activation	2/492	10/10704	0.0743025	0.476339	0.434611	3569/3570	2
R-HSA-1483115	Hydrolysis of LPC	2/492	10/10704	0.0743025	0.476339	0.434611	8605/56261	2
R-HSA-2465910	MASTL Facilitates Mitotic Progression	2/492	10/10704	0.0743025	0.476339	0.434611	84930/5519	2
R-HSA-2562578	TRIF-mediated programmed cell death	2/492	10/10704	0.0743025	0.476339	0.434611	148022/7099	2
R-HSA-450341	Activation of the AP-1 family of transcription factors	2/492	10/10704	0.0743025	0.476339	0.434611	2353/3725	2
R-HSA-5602498	MyD88 deficiency (TLR2/4)	2/492	10/10704	0.0743025	0.476339	0.434611	7099/7097	2
R-HSA-9617629	Regulation of FOXO transcriptional activity by acetylation	2/492	10/10704	0.0743025	0.476339	0.434611	2308/10628	2
R-HSA-8953750	Transcriptional Regulation by E2F6	4/492	35/10704	0.0751082	0.478915	0.436962	2146/80314/23429/6241	4
R-HSA-6796648	TP53 Regulates Transcription of DNA Repair Genes	6/492	65/10704	0.0773131	0.488652	0.445845	905/8178/9656/2176/2353/3725	6
R-HSA-198753	ERK/MAPK targets	3/492	22/10704	0.0777692	0.488652	0.445845	4208/5519/1848	3
R-HSA-3214842	HDMs demethylate histones	5/492	50/10704	0.0783657	0.488652	0.445845	23210/23030/23135/7403/22992	5
R-HSA-5663213	RHO GTPases Activate WASPs and WAVEs	4/492	36/10704	0.0815769	0.488652	0.445845	25/147179/10458/71	4
R-HSA-6804757	Regulation of TP53 Degradation	4/492	36/10704	0.0815769	0.488652	0.445845	208/5519/1029/1616	4
R-HSA-453279	Mitotic G1 phase and G1/S transition	11/492	149/10704	0.0817545	0.488652	0.445845	25/898/208/26271/1026/5519/1030/1029/5001/6241/5696	11
R-HSA-2173795	Downregulation of SMAD2/3:SMAD4 transcriptional activity	3/492	23/10704	0.0865129	0.488652	0.445845	6498/6497/7050	3
R-HSA-1168372	Downstream signaling events of B Cell Receptor (BCR)	7/492	83/10704	0.0866279	0.488652	0.445845	4792/4793/4790/8915/4794/5966/5696	7
R-HSA-196025	Formation of annular gap junctions	2/492	11/10704	0.0881298	0.488652	0.445845	2697/71	2
R-HSA-2022923	Dermatan sulfate biosynthesis	2/492	11/10704	0.0881298	0.488652	0.445845	29940/1464	2
R-HSA-3371378	Regulation by c-FLIP	2/492	11/10704	0.0881298	0.488652	0.445845	8837/355	2
R-HSA-4755510	SUMOylation of immune response proteins	2/492	11/10704	0.0881298	0.488652	0.445845	4791/4792	2
R-HSA-5218900	CASP8 activity is inhibited	2/492	11/10704	0.0881298	0.488652	0.445845	8837/355	2
R-HSA-5603041	IRAK4 deficiency (TLR2/4)	2/492	11/10704	0.0881298	0.488652	0.445845	7099/7097	2
R-HSA-69416	Dimerization of procaspase-8	2/492	11/10704	0.0881298	0.488652	0.445845	8837/355	2
R-HSA-73614	Pyrimidine salvage	2/492	11/10704	0.0881298	0.488652	0.445845	1890/8226	2
R-HSA-9614399	Regulation of localization of FOXO transcription factors	2/492	11/10704	0.0881298	0.488652	0.445845	208/2308	2
R-HSA-6806003	Regulation of TP53 Expression and Degradation	4/492	37/10704	0.0883109	0.488652	0.445845	208/5519/1029/1616	4
R-HSA-8956319	Nucleobase catabolism	4/492	37/10704	0.0883109	0.488652	0.445845	1890/51251/7498/9583	4
R-HSA-381070	IRE1alpha activates chaperones	5/492	52/10704	0.0893789	0.488652	0.445845	55738/55033/3068/10106/2081	5
R-HSA-109703	PKB-mediated events	1/492	2/10704	0.0898196	0.488652	0.445845	208	1
R-HSA-141334	PAOs oxidise polyamines to amines	1/492	2/10704	0.0898196	0.488652	0.445845	54498	1
R-HSA-165160	PDE3B signalling	1/492	2/10704	0.0898196	0.488652	0.445845	208	1
R-HSA-5083627	Defective LARGE causes MDDGA6 and MDDGB6	1/492	2/10704	0.0898196	0.488652	0.445845	11041	1
R-HSA-5578999	Defective GCLC causes Hemolytic anemia due to gamma-glutamylcysteine synthetase deficiency (HAGGSD)	1/492	2/10704	0.0898196	0.488652	0.445845	2730	1
R-HSA-5602566	TICAM1 deficiency - HSE	1/492	2/10704	0.0898196	0.488652	0.445845	148022	1
R-HSA-68881	Mitotic Metaphase/Anaphase Transition	1/492	2/10704	0.0898196	0.488652	0.445845	26271	1
R-HSA-8951911	RUNX3 regulates RUNX1-mediated transcription	1/492	2/10704	0.0898196	0.488652	0.445845	864	1
R-HSA-9630791	Evasion of Oncogene Induced Senescence Due to Defective p16INK4A binding to CDK4	1/492	2/10704	0.0898196	0.488652	0.445845	1029	1
R-HSA-9632697	Evasion of Oxidative Stress Induced Senescence Due to Defective p16INK4A binding to CDK4	1/492	2/10704	0.0898196	0.488652	0.445845	1029	1
R-HSA-9636569	Suppression of autophagy	1/492	2/10704	0.0898196	0.488652	0.445845	80824	1
R-HSA-9645722	Defective Intrinsic Pathway for Apoptosis Due to p14ARF Loss of Function	1/492	2/10704	0.0898196	0.488652	0.445845	1029	1
R-HSA-15869	Metabolism of nucleotides	8/492	101/10704	0.0928312	0.500444	0.456605	1890/7372/51251/8226/7498/6241/9583/7296	8
R-HSA-5607764	CLEC7A (Dectin-1) signaling	8/492	101/10704	0.0928312	0.500444	0.456605	4791/4792/5971/4790/3553/8915/3708/5696	8
R-HSA-109606	Intrinsic Pathway for Apoptosis	5/492	53/10704	0.0951709	0.504187	0.46002	208/27113/5366/1029/10018	5
R-HSA-5689896	Ovarian tumor domain proteases	4/492	38/10704	0.0953039	0.504187	0.46002	57506/8767/64135/7128	4
R-HSA-6783589	Interleukin-6 family signaling	3/492	24/10704	0.095651	0.504187	0.46002	3569/3570/9021	3
R-HSA-8940973	RUNX2 regulates osteoblast differentiation	3/492	24/10704	0.095651	0.504187	0.46002	25/3280/367	3
R-HSA-9634638	Estrogen-dependent nuclear events downstream of ESR-membrane signaling	3/492	24/10704	0.095651	0.504187	0.46002	208/1839/2353	3
R-HSA-2029480	Fcgamma receptor (FCGR) dependent phagocytosis	7/492	86/10704	0.100046	0.520232	0.47466	5291/25/3708/5581/147179/10458/71	7
R-HSA-6811558	PI5P, PP2A and IER3 Regulate PI3K/AKT Signaling	8/492	103/10704	0.101123	0.520232	0.47466	5291/5155/1839/8870/5519/8394/3643/23396	8
R-HSA-74751	Insulin receptor signalling cascade	5/492	54/10704	0.101149	0.520232	0.47466	9846/5291/57761/208/3643	5
R-HSA-72172	mRNA Splicing	13/492	191/10704	0.101682	0.520232	0.47466	3183/8896/9343/6434/5546/10262/81608/51585/1479/22827/11066/23450/54883	13
R-HSA-8853884	Transcriptional Regulation by VENTX	4/492	39/10704	0.102549	0.520232	0.47466	51343/4790/3569/1029	4
R-HSA-190873	Gap junction degradation	2/492	12/10704	0.102643	0.520232	0.47466	2697/71	2
R-HSA-6803211	TP53 Regulates Transcription of Death Receptors and Ligands	2/492	12/10704	0.102643	0.520232	0.47466	355/8793	2
R-HSA-73621	Pyrimidine catabolism	2/492	12/10704	0.102643	0.520232	0.47466	1890/51251	2
R-HSA-933543	NF-kB activation through FADD/RIP-1 pathway mediated by caspase-8 and -10	2/492	12/10704	0.102643	0.520232	0.47466	57506/64135	2
R-HSA-8878166	Transcriptional regulation by RUNX2	9/492	121/10704	0.104702	0.524049	0.478142	25/208/3280/1026/4091/367/4086/5696/117581	9
R-HSA-2029485	Role of phospholipids in phagocytosis	3/492	25/10704	0.105163	0.524049	0.478142	5291/3708/5581	3
R-HSA-400685	Sema4D in semaphorin signaling	3/492	25/10704	0.105163	0.524049	0.478142	4637/2909/27289	3
R-HSA-5674400	Constitutive Signaling by AKT1 E17K in Cancer	3/492	25/10704	0.105163	0.524049	0.478142	208/1026/2308	3
R-HSA-1971475	A tetrasaccharide linker sequence is required for GAG synthesis	3/492	26/10704	0.115029	0.558909	0.509948	64132/6385/1464	3
R-HSA-5693554	Resolution of D-loop Structures through Synthesis-Dependent Strand Annealing (SDSA)	3/492	26/10704	0.115029	0.558909	0.509948	79728/4683/675	3
R-HSA-912694	Regulation of IFNA signaling	3/492	26/10704	0.115029	0.558909	0.509948	9021/11274/5770	3
R-HSA-1358803	Downregulation of ERBB2:ERBB3 signaling	2/492	13/10704	0.11775	0.558909	0.509948	208/10193	2
R-HSA-1362409	Mitochondrial iron-sulfur cluster biogenesis	2/492	13/10704	0.11775	0.558909	0.509948	150274/81894	2
R-HSA-174430	Telomere C-strand synthesis initiation	2/492	13/10704	0.11775	0.558909	0.509948	25913/80169	2
R-HSA-202670	ERKs are inactivated	2/492	13/10704	0.11775	0.558909	0.509948	5519/1848	2
R-HSA-209560	NF-kB is activated and signals survival	2/492	13/10704	0.11775	0.558909	0.509948	4792/4790	2
R-HSA-3270619	IRF3-mediated induction of type I IFN	2/492	13/10704	0.11775	0.558909	0.509948	3428/29110	2
R-HSA-75205	Dissolution of Fibrin Clot	2/492	13/10704	0.11775	0.558909	0.509948	5329/5270	2
R-HSA-159231	Transport of Mature mRNA Derived from an Intronless Transcript	4/492	41/10704	0.117765	0.558909	0.509948	8480/9972/81608/10482	4
R-HSA-983168	Antigen processing: Ubiquitination & Proteasome degradation	19/492	309/10704	0.120396	0.558909	0.509948	29116/51665/79791/51343/7704/127544/5930/6737/10489/57520/55008/51191/899/10193/9021/140691/55182/9666/5696	19
R-HSA-2559580	Oxidative Stress Induced Senescence	9/492	125/10704	0.121332	0.558909	0.509948	2146/23135/8535/1030/1029/2353/3725/23466/4217	9
R-HSA-114508	Effects of PIP2 hydrolysis	3/492	27/10704	0.125228	0.558909	0.509948	1609/3708/5581	3
R-HSA-159234	Transport of Mature mRNAs Derived from Intronless Transcripts	4/492	42/10704	0.12572	0.558909	0.509948	8480/9972/81608/10482	4
R-HSA-3928662	EPHB-mediated forward signaling	4/492	42/10704	0.12572	0.558909	0.509948	1947/1948/71/2050	4
R-HSA-2682334	EPH-Ephrin signaling	7/492	92/10704	0.130058	0.558909	0.509948	1947/4637/1948/1969/1942/71/2050	7
R-HSA-111446	Activation of BIM and translocation to mitochondria	1/492	3/10704	0.131663	0.558909	0.509948	10018	1
R-HSA-1299308	Tandem of pore domain in a weak inwardly rectifying K+ channels (TWIK)	1/492	3/10704	0.131663	0.558909	0.509948	9424	1
R-HSA-165181	Inhibition of TSC complex formation by PKB	1/492	3/10704	0.131663	0.558909	0.509948	208	1
R-HSA-190704	Oligomerization of connexins into connexons	1/492	3/10704	0.131663	0.558909	0.509948	2697	1
R-HSA-190827	Transport of connexins along the secretory pathway	1/492	3/10704	0.131663	0.558909	0.509948	2697	1
R-HSA-191650	Regulation of gap junction activity	1/492	3/10704	0.131663	0.558909	0.509948	2697	1
R-HSA-3249367	STAT6-mediated induction of chemokines	1/492	3/10704	0.131663	0.558909	0.509948	29110	1
R-HSA-351200	Interconversion of polyamines	1/492	3/10704	0.131663	0.558909	0.509948	54498	1
R-HSA-500753	Pyrimidine biosynthesis	1/492	3/10704	0.131663	0.558909	0.509948	7372	1
R-HSA-5602571	TRAF3 deficiency - HSE	1/492	3/10704	0.131663	0.558909	0.509948	148022	1
R-HSA-5660489	MTF1 activates gene expression	1/492	3/10704	0.131663	0.558909	0.509948	4520	1
R-HSA-880009	Interconversion of 2-oxoglutarate and 2-hydroxyglutarate	1/492	3/10704	0.131663	0.558909	0.509948	79944	1
R-HSA-8849472	PTK6 Down-Regulation	1/492	3/10704	0.131663	0.558909	0.509948	5770	1
R-HSA-9630747	Diseases of Cellular Senescence	1/492	3/10704	0.131663	0.558909	0.509948	1029	1
R-HSA-9630750	Evasion of Oncogene Induced Senescence Due to p16INK4A Defects	1/492	3/10704	0.131663	0.558909	0.509948	1029	1
R-HSA-9630794	Evasion of Oncogene Induced Senescence Due to Defective p16INK4A binding to CDK4 and CDK6	1/492	3/10704	0.131663	0.558909	0.509948	1029	1
R-HSA-9632693	Evasion of Oxidative Stress Induced Senescence Due to p16INK4A Defects	1/492	3/10704	0.131663	0.558909	0.509948	1029	1
R-HSA-9632700	Evasion of Oxidative Stress Induced Senescence Due to Defective p16INK4A binding to CDK4 and CDK6	1/492	3/10704	0.131663	0.558909	0.509948	1029	1
R-HSA-9673766	Signaling by cytosolic PDGFRA and PDGFRB fusion proteins	1/492	3/10704	0.131663	0.558909	0.509948	81608	1
R-HSA-9675132	Diseases of cellular response to stress	1/492	3/10704	0.131663	0.558909	0.509948	1029	1
R-HSA-174490	Membrane binding and targetting of GAG proteins	2/492	14/10704	0.133365	0.558909	0.509948	9397/89853	2
R-HSA-174495	Synthesis And Processing Of GAG, GAGPOL Polyproteins	2/492	14/10704	0.133365	0.558909	0.509948	9397/89853	2
R-HSA-198323	AKT phosphorylates targets in the cytosol	2/492	14/10704	0.133365	0.558909	0.509948	208/1026	2
R-HSA-200425	Carnitine metabolism	2/492	14/10704	0.133365	0.558909	0.509948	1374/6256	2
R-HSA-399955	SEMA3A-Plexin repulsion signaling by inhibiting Integrin adhesion	2/492	14/10704	0.133365	0.558909	0.509948	27289/23396	2
R-HSA-8941856	RUNX3 regulates NOTCH signaling	2/492	14/10704	0.133365	0.558909	0.509948	864/3280	2
R-HSA-9679504	Translation of Replicase and Assembly of the Replication Transcription Complex	2/492	14/10704	0.133365	0.558909	0.509948	128866/7405	2
R-HSA-9694676	Translation of Replicase and Assembly of the Replication Transcription Complex	2/492	14/10704	0.133365	0.558909	0.509948	128866/7405	2
R-HSA-6782315	tRNA modification in the nucleus and cytosol	4/492	43/10704	0.133894	0.558978	0.510011	4234/51605/10785/221078	4
R-HSA-1482788	Acyl chain remodelling of PC	3/492	28/10704	0.135738	0.558978	0.510011	8605/50640/79888	3
R-HSA-201451	Signaling by BMP	3/492	28/10704	0.135738	0.558978	0.510011	4091/6497/4086	3
R-HSA-69205	G1/S-Specific Transcription	3/492	28/10704	0.135738	0.558978	0.510011	898/26271/6241	3
R-HSA-75067	Processing of Capped Intronless Pre-mRNA	3/492	28/10704	0.135738	0.558978	0.510011	81608/51585/1479	3
R-HSA-72163	mRNA Splicing - Major Pathway	12/492	183/10704	0.136902	0.561819	0.512603	3183/8896/9343/6434/5546/10262/81608/51585/1479/22827/23450/54883	12
R-HSA-3108214	SUMOylation of DNA damage response and repair proteins	6/492	77/10704	0.142203	0.579875	0.529077	8480/9972/9656/8535/1029/56160	6
R-HSA-109704	PI3K Cascade	4/492	44/10704	0.14228	0.579875	0.529077	9846/5291/57761/208	4
R-HSA-162588	Budding and maturation of HIV virion	3/492	29/10704	0.146539	0.591138	0.539354	51510/128866/89853	3
R-HSA-8863795	Downregulation of ERBB2 signaling	3/492	29/10704	0.146539	0.591138	0.539354	208/1839/10193	3
R-HSA-9615017	FOXO-mediated transcription of oxidative stress, metabolic and neuronal genes	3/492	29/10704	0.146539	0.591138	0.539354	6648/3484/2308	3
R-HSA-2022090	Assembly of collagen fibrils and other multimeric structures	5/492	61/10704	0.147899	0.594606	0.542518	3909/3918/1520/5339/3914	5
R-HSA-3134975	Regulation of innate immune responses to cytosolic DNA	2/492	15/10704	0.149411	0.594637	0.542546	6737/29110	2
R-HSA-3772470	Negative regulation of TCF-dependent signaling by WNT ligand antagonists	2/492	15/10704	0.149411	0.594637	0.542546	4040/22943	2
R-HSA-430039	mRNA decay by 5' to 3' exoribonuclease	2/492	15/10704	0.149411	0.594637	0.542546	219988/55802	2
R-HSA-3928663	EPHA-mediated growth cone collapse	3/492	30/10704	0.157607	0.62299	0.568415	4637/1969/1942	3
R-HSA-525793	Myogenesis	3/492	30/10704	0.157607	0.62299	0.568415	4208/25/6300	3
R-HSA-193704	p75 NTR receptor-mediated signalling	7/492	97/10704	0.158111	0.62299	0.568415	4792/8767/4790/9828/26230/10018/22899	7
R-HSA-1169410	Antiviral mechanism by IFN-stimulated genes	6/492	80/10704	0.161447	0.626159	0.571307	4938/8480/9972/8638/51191/11274	6
R-HSA-2454202	Fc epsilon receptor (FCERI) signaling	9/492	134/10704	0.163572	0.626159	0.571307	9846/5291/4792/4790/8915/3708/2353/3725/5696	9
R-HSA-175474	Assembly Of The HIV Virion	2/492	16/10704	0.165815	0.626159	0.571307	9397/89853	2
R-HSA-2730905	Role of LAT2/NTAL/LAB on calcium mobilization	2/492	16/10704	0.165815	0.626159	0.571307	9846/5291	2
R-HSA-167161	HIV Transcription Initiation	4/492	47/10704	0.168607	0.626159	0.571307	6882/2959/6879/6884	4
R-HSA-167162	RNA Polymerase II HIV Promoter Escape	4/492	47/10704	0.168607	0.626159	0.571307	6882/2959/6879/6884	4
R-HSA-4570464	SUMOylation of RNA binding proteins	4/492	47/10704	0.168607	0.626159	0.571307	3183/8480/9972/8535	4
R-HSA-73776	RNA Polymerase II Promoter Escape	4/492	47/10704	0.168607	0.626159	0.571307	6882/2959/6879/6884	4
R-HSA-73779	RNA Polymerase II Transcription Pre-Initiation And Promoter Opening	4/492	47/10704	0.168607	0.626159	0.571307	6882/2959/6879/6884	4
R-HSA-75953	RNA Polymerase II Transcription Initiation	4/492	47/10704	0.168607	0.626159	0.571307	6882/2959/6879/6884	4
R-HSA-76042	RNA Polymerase II Transcription Initiation And Promoter Clearance	4/492	47/10704	0.168607	0.626159	0.571307	6882/2959/6879/6884	4
R-HSA-4420097	VEGFA-VEGFR2 Pathway	7/492	99/10704	0.170048	0.626159	0.571307	5291/57761/208/3708/10458/71/6300	7
R-HSA-421270	Cell-cell junction organization	5/492	64/10704	0.170312	0.626159	0.571307	5010/24146/23562/9076/71	5
R-HSA-140179	Amine Oxidase reactions	1/492	4/10704	0.171587	0.626159	0.571307	54498	1
R-HSA-2408550	Metabolism of ingested H2SeO4 and H2SeO3 into H2Se	1/492	4/10704	0.171587	0.626159	0.571307	7296	1
R-HSA-2473224	Antagonism of Activin by Follistatin	1/492	4/10704	0.171587	0.626159	0.571307	10468	1
R-HSA-5221030	TET1,2,3 and TDG demethylate DNA	1/492	4/10704	0.171587	0.626159	0.571307	200424	1
R-HSA-5368598	Negative regulation of TCF-dependent signaling by DVL-interacting proteins	1/492	4/10704	0.171587	0.626159	0.571307	440193	1
R-HSA-69200	Phosphorylation of proteins involved in G1/S transition by active Cyclin E:Cdk2 complexes	1/492	4/10704	0.171587	0.626159	0.571307	898	1
R-HSA-69560	Transcriptional activation of p53 responsive genes	1/492	4/10704	0.171587	0.626159	0.571307	1026	1
R-HSA-69895	Transcriptional activation of cell cycle inhibitor p21	1/492	4/10704	0.171587	0.626159	0.571307	1026	1
R-HSA-8849474	PTK6 Activates STAT3	1/492	4/10704	0.171587	0.626159	0.571307	9021	1
R-HSA-8853383	Lysosomal oligosaccharide catabolism	1/492	4/10704	0.171587	0.626159	0.571307	4126	1
R-HSA-9686347	Microbial modulation of RIPK1-mediated regulated necrosis	1/492	4/10704	0.171587	0.626159	0.571307	197259	1
R-HSA-5663202	Diseases of signal transduction by growth factor receptors and second messengers	22/492	387/10704	0.17762	0.644654	0.588181	9846/9734/5291/4040/5155/6907/208/56829/22943/80824/1839/3280/1026/5519/1848/81608/2308/10018/71/1850/5696/54492	22
R-HSA-112399	IRS-mediated signalling	4/492	48/10704	0.177742	0.644654	0.588181	9846/5291/57761/208	4
R-HSA-917729	Endosomal Sorting Complex Required For Transport (ESCRT)	3/492	32/10704	0.180466	0.652538	0.595375	51510/128866/89853	3
R-HSA-450513	Tristetraprolin (TTP, ZFP36) binds and destabilizes mRNA	2/492	17/10704	0.182511	0.653951	0.596664	5393/55802	2
R-HSA-9659787	Aberrant regulation of mitotic G1/S transition in cancer due to RB1 defects	2/492	17/10704	0.182511	0.653951	0.596664	898/1026	2
R-HSA-9661069	Defective binding of RB1 mutants to E2F1,(E2F2, E2F3)	2/492	17/10704	0.182511	0.653951	0.596664	898/1026	2
R-HSA-1483255	PI Metabolism	6/492	84/10704	0.188723	0.670135	0.61143	5291/57664/8394/25816/126282/23396	6
R-HSA-674695	RNA Polymerase II Pre-transcription Events	6/492	84/10704	0.188723	0.670135	0.61143	6882/905/8178/2959/6879/6884	6
R-HSA-6802957	Oncogenic MAPK signaling	6/492	84/10704	0.188723	0.670135	0.61143	56829/80824/1848/10018/71/1850	6
R-HSA-5693568	Resolution of D-loop Structures through Holliday Junction Intermediates	3/492	33/10704	0.192214	0.678469	0.619034	79728/4683/675	3
R-HSA-8964043	Plasma lipoprotein clearance	3/492	33/10704	0.192214	0.678469	0.619034	29116/3988/26119	3
R-HSA-69656	Cyclin A:Cdk2-associated events at S phase entry	6/492	85/10704	0.195806	0.687421	0.627202	994/898/208/51343/1026/5696	6
R-HSA-1227986	Signaling by ERBB2	4/492	50/10704	0.196489	0.687421	0.627202	208/1839/5581/10193	4
R-HSA-381038	XBP1(S) activates chaperone genes	4/492	50/10704	0.196489	0.687421	0.627202	55738/55033/3068/10106	4
R-HSA-210993	Tie2 Signaling	2/492	18/10704	0.199436	0.695681	0.634739	5291/285	2
R-HSA-159227	Transport of the SLBP independent Mature mRNA	3/492	34/10704	0.204146	0.702462	0.640925	8480/9972/10482	3
R-HSA-4791275	Signaling by WNT in cancer	3/492	34/10704	0.204146	0.702462	0.640925	4040/22943/5519	3
R-HSA-5693537	Resolution of D-Loop Structures	3/492	34/10704	0.204146	0.702462	0.640925	79728/4683/675	3
R-HSA-9678108	SARS-CoV-1 Infection	4/492	51/10704	0.206081	0.702462	0.640925	6482/128866/56965/7405	4
R-HSA-5621481	C-type lectin receptors (CLRs)	9/492	142/10704	0.206198	0.702462	0.640925	4791/4792/5971/4790/3553/8915/3708/26253/5696	9
R-HSA-111448	Activation of NOXA and translocation to mitochondria	1/492	5/10704	0.209678	0.702462	0.640925	5366	1
R-HSA-1606341	IRF3 mediated activation of type 1 IFN	1/492	5/10704	0.209678	0.702462	0.640925	29110	1
R-HSA-74713	IRS activation	1/492	5/10704	0.209678	0.702462	0.640925	3643	1
R-HSA-75157	FasL/ CD95L signaling	1/492	5/10704	0.209678	0.702462	0.640925	355	1
R-HSA-8866911	TFAP2 (AP-2) family regulates transcription of cell cycle factors	1/492	5/10704	0.209678	0.702462	0.640925	1026	1
R-HSA-8964026	Chylomicron clearance	1/492	5/10704	0.209678	0.702462	0.640925	26119	1
R-HSA-9022707	MECP2 regulates transcription factors	1/492	5/10704	0.209678	0.702462	0.640925	4208	1
R-HSA-9031528	NR1H2 & NR1H3 regulate gene expression linked to triglyceride lipolysis in adipose	1/492	5/10704	0.209678	0.702462	0.640925	6256	1
R-HSA-9632974	NR1H2 & NR1H3 regulate gene expression linked to gluconeogenesis	1/492	5/10704	0.209678	0.702462	0.640925	6256	1
R-HSA-5628897	TP53 Regulates Metabolic Genes	6/492	87/10704	0.210265	0.702462	0.640925	208/8649/83667/7296/4513/4512	6
R-HSA-2428928	IRS-related events triggered by IGF1R	4/492	52/10704	0.215806	0.709424	0.647278	9846/5291/57761/208	4
R-HSA-72165	mRNA Splicing - Minor Pathway	4/492	52/10704	0.215806	0.709424	0.647278	9343/10262/11066/23450	4
R-HSA-75153	Apoptotic execution phase	4/492	52/10704	0.215806	0.709424	0.647278	1832/329/3007/5339	4
R-HSA-159230	Transport of the SLBP Dependant Mature mRNA	3/492	35/10704	0.216244	0.709424	0.647278	8480/9972/10482	3
R-HSA-422085	Synthesis, secretion, and deacylation of Ghrelin	2/492	19/10704	0.216536	0.709424	0.647278	60559/9314	2
R-HSA-5686938	Regulation of TLR by endogenous ligand	2/492	19/10704	0.216536	0.709424	0.647278	7099/7097	2
R-HSA-8964038	LDL clearance	2/492	19/10704	0.216536	0.709424	0.647278	3988/26119	2
R-HSA-1660499	Synthesis of PIPs at the plasma membrane	4/492	53/10704	0.225654	0.735236	0.670829	5291/57664/8394/23396	4
R-HSA-2428924	IGF1R signaling cascade	4/492	53/10704	0.225654	0.735236	0.670829	9846/5291/57761/208	4
R-HSA-194138	Signaling by VEGF	7/492	108/10704	0.228174	0.736371	0.671864	5291/57761/208/3708/10458/71/6300	7
R-HSA-2514859	Inactivation, recovery and regulation of the phototransduction cascade	3/492	36/10704	0.228486	0.736371	0.671864	2868/9397/23173	3
R-HSA-9675126	Diseases of mitotic cell cycle	3/492	36/10704	0.228486	0.736371	0.671864	898/51343/1026	3
R-HSA-9687139	Aberrant regulation of mitotic cell cycle due to RB1 defects	3/492	36/10704	0.228486	0.736371	0.671864	898/51343/1026	3
R-HSA-1474290	Collagen formation	6/492	90/10704	0.232619	0.739297	0.674534	3909/3918/871/1520/5339/3914	6
R-HSA-3560783	Defective B4GALT7 causes EDS, progeroid type	2/492	20/10704	0.233758	0.739297	0.674534	6385/1464	2
R-HSA-3560801	Defective B3GAT3 causes JDSSDHD	2/492	20/10704	0.233758	0.739297	0.674534	6385/1464	2
R-HSA-4420332	Defective B3GALT6 causes EDSP2 and SEMDJL1	2/492	20/10704	0.233758	0.739297	0.674534	6385/1464	2
R-HSA-6803204	TP53 Regulates Transcription of Genes Involved in Cytochrome C Release	2/492	20/10704	0.233758	0.739297	0.674534	27113/5366	2
R-HSA-9603798	Class I peroxisomal membrane protein import	2/492	20/10704	0.233758	0.739297	0.674534	11264/5825	2
R-HSA-9671555	Signaling by PDGFR in disease	2/492	20/10704	0.233758	0.739297	0.674534	5291/81608	2
R-HSA-2404192	Signaling by Type 1 Insulin-like Growth Factor 1 Receptor (IGF1R)	4/492	54/10704	0.235615	0.740562	0.675689	9846/5291/57761/208	4
R-HSA-2514856	The phototransduction cascade	3/492	37/10704	0.240854	0.740562	0.675689	2868/9397/23173	3
R-HSA-1638091	Heparan sulfate/heparin (HS-GAG) metabolism	4/492	55/10704	0.245678	0.740562	0.675689	64132/3340/6385/1464	4
R-HSA-1655829	Regulation of cholesterol biosynthesis by SREBP (SREBF)	4/492	55/10704	0.245678	0.740562	0.675689	6907/10802/6256/4520	4
R-HSA-429914	Deadenylation-dependent mRNA decay	4/492	55/10704	0.245678	0.740562	0.675689	5393/9924/219988/55802	4
R-HSA-173623	Classical antibody-mediated complement activation	1/492	6/10704	0.246022	0.740562	0.675689	716	1
R-HSA-174362	Transport and synthesis of PAPS	1/492	6/10704	0.246022	0.740562	0.675689	1836	1
R-HSA-389599	Alpha-oxidation of phytanate	1/492	6/10704	0.246022	0.740562	0.675689	5264	1
R-HSA-433692	Proton-coupled monocarboxylate transport	1/492	6/10704	0.246022	0.740562	0.675689	9123	1
R-HSA-446199	Synthesis of Dolichyl-phosphate	1/492	6/10704	0.246022	0.740562	0.675689	22845	1
R-HSA-5339717	Misspliced LRP5 mutants have enhanced beta-catenin-dependent signaling	1/492	6/10704	0.246022	0.740562	0.675689	22943	1
R-HSA-5693548	Sensing of DNA Double Strand Breaks	1/492	6/10704	0.246022	0.740562	0.675689	4683	1
R-HSA-6787639	GDP-fucose biosynthesis	1/492	6/10704	0.246022	0.740562	0.675689	55343	1
R-HSA-68616	Assembly of the ORC complex at the origin of replication	1/492	6/10704	0.246022	0.740562	0.675689	5001	1
R-HSA-77346	Beta oxidation of decanoyl-CoA to octanoyl-CoA-CoA	1/492	6/10704	0.246022	0.740562	0.675689	51102	1
R-HSA-8849470	PTK6 Regulates Cell Cycle	1/492	6/10704	0.246022	0.740562	0.675689	898	1
R-HSA-8857538	PTK6 promotes HIF1A stabilization	1/492	6/10704	0.246022	0.740562	0.675689	1839	1
R-HSA-8949275	RUNX3 Regulates Immune Response and Cell Migration	1/492	6/10704	0.246022	0.740562	0.675689	864	1
R-HSA-9013957	TLR3-mediated TICAM1-dependent programmed cell death	1/492	6/10704	0.246022	0.740562	0.675689	148022	1
R-HSA-210745	Regulation of gene expression in beta cells	2/492	21/10704	0.251054	0.742519	0.677474	208/2308	2
R-HSA-389513	CTLA4 inhibitory signaling	2/492	21/10704	0.251054	0.742519	0.677474	208/5519	2
R-HSA-416572	Sema4D induced cell migration and growth-cone collapse	2/492	21/10704	0.251054	0.742519	0.677474	4637/27289	2
R-HSA-4641263	Regulation of FZD by ubiquitination	2/492	21/10704	0.251054	0.742519	0.677474	4040/84133	2
R-HSA-5621575	CD209 (DC-SIGN) signaling	2/492	21/10704	0.251054	0.742519	0.677474	5971/4790	2
R-HSA-6807004	Negative regulation of MET activity	2/492	21/10704	0.251054	0.742519	0.677474	5771/5770	2
R-HSA-70895	Branched-chain amino acid catabolism	2/492	21/10704	0.251054	0.742519	0.677474	3712/152926	2
R-HSA-111465	Apoptotic cleavage of cellular proteins	3/492	38/10704	0.25333	0.745532	0.680223	1832/329/5339	3
R-HSA-8939243	RUNX1 interacts with co-factors whose precise effect on RUNX1 targets is not known	3/492	38/10704	0.25333	0.745532	0.680223	8535/23429/23466	3
R-HSA-69206	G1/S Transition	8/492	131/10704	0.254824	0.748072	0.68254	898/208/26271/1026/5519/5001/6241/5696	8
R-HSA-2151201	Transcriptional activation of mitochondrial biogenesis	4/492	56/10704	0.255834	0.749182	0.683553	4208/6907/6648/6256	4
R-HSA-390471	Association of TriC/CCT with target proteins during biosynthesis	3/492	39/10704	0.265895	0.776346	0.708337	83752/898/10238	3
R-HSA-113510	E2F mediated regulation of DNA replication	2/492	22/10704	0.268383	0.776346	0.708337	5519/5001	2
R-HSA-1250196	SHC1 events in ERBB2 signaling	2/492	22/10704	0.268383	0.776346	0.708337	1839/5581	2
R-HSA-140875	Common Pathway of Fibrin Clot Formation	2/492	22/10704	0.268383	0.776346	0.708337	5270/7056	2
R-HSA-389357	CD28 dependent PI3K/Akt signaling	2/492	22/10704	0.268383	0.776346	0.708337	57761/208	2
R-HSA-1592230	Mitochondrial biogenesis	6/492	95/10704	0.271378	0.783101	0.714501	4208/6907/6648/516/6256/6300	6
R-HSA-2644602	Signaling by NOTCH1 PEST Domain Mutants in Cancer	4/492	58/10704	0.276385	0.785157	0.716377	9734/6907/3280/54492	4
R-HSA-2644603	Signaling by NOTCH1 in Cancer	4/492	58/10704	0.276385	0.785157	0.716377	9734/6907/3280/54492	4
R-HSA-2644606	Constitutive Signaling by NOTCH1 PEST Domain Mutants	4/492	58/10704	0.276385	0.785157	0.716377	9734/6907/3280/54492	4
R-HSA-2894858	Signaling by NOTCH1 HD+PEST Domain Mutants in Cancer	4/492	58/10704	0.276385	0.785157	0.716377	9734/6907/3280/54492	4
R-HSA-2894862	Constitutive Signaling by NOTCH1 HD+PEST Domain Mutants	4/492	58/10704	0.276385	0.785157	0.716377	9734/6907/3280/54492	4
R-HSA-72187	mRNA 3'-end processing	4/492	58/10704	0.276385	0.785157	0.716377	9984/81608/51585/1479	4
R-HSA-8853659	RET signaling	3/492	40/10704	0.278532	0.785157	0.716377	9846/5291/1796	3
R-HSA-162791	Attachment of GPI anchor to uPAR	1/492	7/10704	0.280697	0.785157	0.716377	5329	1
R-HSA-163767	PP2A-mediated dephosphorylation of key metabolic factors	1/492	7/10704	0.280697	0.785157	0.716377	5519	1
R-HSA-164843	2-LTR circle formation	1/492	7/10704	0.280697	0.785157	0.716377	3981	1
R-HSA-9022537	Loss of MECP2 binding ability to the NCoR/SMRT complex	1/492	7/10704	0.280697	0.785157	0.716377	6907	1
R-HSA-9637628	Modulation by Mtb of host immune system	1/492	7/10704	0.280697	0.785157	0.716377	7097	1
R-HSA-9645135	STAT5 Activation	1/492	7/10704	0.280697	0.785157	0.716377	9846	1
R-HSA-450321	JNK (c-Jun kinases) phosphorylation and activation mediated by activated human TAK1	2/492	23/10704	0.285704	0.788567	0.719488	8767/3656	2
R-HSA-8956321	Nucleotide salvage	2/492	23/10704	0.285704	0.788567	0.719488	1890/8226	2
R-HSA-193648	NRAGE signals death through JNK	4/492	59/10704	0.286761	0.788567	0.719488	9828/26230/10018/22899	4
R-HSA-351202	Metabolism of polyamines	4/492	59/10704	0.286761	0.788567	0.719488	54498/4953/51582/5696	4
R-HSA-9664407	Parasite infection	4/492	59/10704	0.286761	0.788567	0.719488	25/147179/10458/71	4
R-HSA-9664417	Leishmania phagocytosis	4/492	59/10704	0.286761	0.788567	0.719488	25/147179/10458/71	4
R-HSA-9664422	FCGR3A-mediated phagocytosis	4/492	59/10704	0.286761	0.788567	0.719488	25/147179/10458/71	4
R-HSA-74752	Signaling by Insulin receptor	5/492	78/10704	0.28848	0.788567	0.719488	9846/5291/57761/208/3643	5
R-HSA-1428517	The citric acid (TCA) cycle and respiratory electron transport	10/492	176/10704	0.290804	0.788567	0.719488	79944/9123/516/6256/4513/4519/4536/4540/4512/4535	10
R-HSA-165159	MTOR signalling	3/492	41/10704	0.291224	0.788567	0.719488	29904/208/8649	3
R-HSA-186712	Regulation of beta-cell development	3/492	41/10704	0.291224	0.788567	0.719488	208/3280/2308	3
R-HSA-3560782	Diseases associated with glycosaminoglycan metabolism	3/492	41/10704	0.291224	0.788567	0.719488	6385/1836/1464	3
R-HSA-74158	RNA Polymerase III Transcription	3/492	41/10704	0.291224	0.788567	0.719488	4782/5451/7702	3
R-HSA-749476	RNA Polymerase III Abortive And Retractive Initiation	3/492	41/10704	0.291224	0.788567	0.719488	4782/5451/7702	3
R-HSA-202424	Downstream TCR signaling	6/492	98/10704	0.295349	0.797913	0.728015	5291/4792/8767/4790/8915/5696	6
R-HSA-166208	mTORC1-mediated signalling	2/492	24/10704	0.302981	0.805506	0.734943	29904/8649	2
R-HSA-449836	Other interleukin signaling	2/492	24/10704	0.302981	0.805506	0.734943	1440/1435	2
R-HSA-450302	activated TAK1 mediates p38 MAPK activation	2/492	24/10704	0.302981	0.805506	0.734943	8767/3656	2
R-HSA-452723	Transcriptional regulation of pluripotent stem cells	2/492	24/10704	0.302981	0.805506	0.734943	64344/9314	2
R-HSA-982772	Growth hormone receptor signaling	2/492	24/10704	0.302981	0.805506	0.734943	9021/5770	2
R-HSA-2426168	Activation of gene expression by SREBF (SREBP)	3/492	42/10704	0.303956	0.805506	0.734943	6907/6256/4520	3
R-HSA-5693579	Homologous DNA Pairing and Strand Exchange	3/492	42/10704	0.303956	0.805506	0.734943	79728/4683/675	3
R-HSA-2559586	DNA Damage/Telomere Stress Induced Senescence	5/492	80/10704	0.306576	0.805506	0.734943	4683/898/3007/1026/25913	5
R-HSA-2029482	Regulation of actin dynamics for phagocytic cup formation	4/492	61/10704	0.307669	0.805506	0.734943	25/147179/10458/71	4
R-HSA-3595172	Defective CHST3 causes SEDCJD	1/492	8/10704	0.313781	0.805506	0.734943	1464	1
R-HSA-3595174	Defective CHST14 causes EDS, musculocontractural type	1/492	8/10704	0.313781	0.805506	0.734943	1464	1
R-HSA-3595177	Defective CHSY1 causes TPBS	1/492	8/10704	0.313781	0.805506	0.734943	1464	1
R-HSA-428890	Role of ABL in ROBO-SLIT signaling	1/492	8/10704	0.313781	0.805506	0.734943	25	1
R-HSA-434316	Fatty Acids bound to GPR40 (FFAR1) regulate insulin secretion	1/492	8/10704	0.313781	0.805506	0.734943	9630	1
R-HSA-4411364	Binding of TCF/LEF:CTNNB1 to target gene promoters	1/492	8/10704	0.313781	0.805506	0.734943	864	1
R-HSA-5340588	RNF mutants show enhanced WNT signaling and proliferation	1/492	8/10704	0.313781	0.805506	0.734943	4040	1
R-HSA-5638302	Signaling by Overexpressed Wild-Type EGFR in Cancer	1/492	8/10704	0.313781	0.805506	0.734943	1839	1
R-HSA-5638303	Inhibition of Signaling by Overexpressed EGFR	1/492	8/10704	0.313781	0.805506	0.734943	1839	1
R-HSA-8850843	Phosphate bond hydrolysis by NTPDase proteins	1/492	8/10704	0.313781	0.805506	0.734943	9583	1
R-HSA-8939242	RUNX1 regulates transcription of genes involved in differentiation of keratinocytes	1/492	8/10704	0.313781	0.805506	0.734943	9021	1
R-HSA-8941332	RUNX2 regulates genes involved in cell migration	1/492	8/10704	0.313781	0.805506	0.734943	208	1
R-HSA-8951430	RUNX3 regulates WNT signaling	1/492	8/10704	0.313781	0.805506	0.734943	864	1
R-HSA-9012546	Interleukin-18 signaling	1/492	8/10704	0.313781	0.805506	0.734943	8809	1
R-HSA-6807070	PTEN Regulation	8/492	140/10704	0.315172	0.807331	0.736608	208/2146/8649/1958/8535/3725/23466/5696	8
R-HSA-8986944	Transcriptional Regulation by MECP2	4/492	62/10704	0.318182	0.809673	0.738745	4208/6907/54487/5770	4
R-HSA-375276	Peptide ligand-binding receptors	11/492	201/10704	0.319496	0.809673	0.738745	6376/2920/6347/6364/2921/6374/2919/3627/6373/3576/6352	11
R-HSA-2219528	PI3K/AKT Signaling in Cancer	6/492	101/10704	0.319716	0.809673	0.738745	5291/5155/208/1839/1026/2308	6
R-HSA-611105	Respiratory electron transport	6/492	101/10704	0.319716	0.809673	0.738745	4513/4519/4536/4540/4512/4535	6
R-HSA-69273	Cyclin A/B1/B2 associated events during G2/M transition	2/492	25/10704	0.320183	0.809673	0.738745	994/5519	2
R-HSA-983170	Antigen Presentation: Folding, assembly and peptide loading of class I MHC	2/492	25/10704	0.320183	0.809673	0.738745	10802/6890	2
R-HSA-5683057	MAPK family signaling cascades	17/492	325/10704	0.325848	0.822247	0.750217	5291/5155/8649/80824/1839/3569/58489/5519/1848/10435/2308/3570/3725/71/1850/6300/5696	17
R-HSA-174411	Polymerase switching on the C-strand of the telomere	2/492	26/10704	0.337279	0.835878	0.762654	25913/80169	2
R-HSA-180024	DARPP-32 events	2/492	26/10704	0.337279	0.835878	0.762654	5143/5519	2
R-HSA-72202	Transport of Mature Transcript to Cytoplasm	5/492	84/10704	0.343198	0.835878	0.762654	9984/8480/9972/81608/10482	5
R-HSA-9007101	Rab regulation of trafficking	7/492	124/10704	0.34406	0.835878	0.762654	208/54662/57589/10981/125058/58485/160518	7
R-HSA-113507	E2F-enabled inhibition of pre-replication complex formation	1/492	9/10704	0.345346	0.835878	0.762654	5001	1
R-HSA-139915	Activation of PUMA and translocation to mitochondria	1/492	9/10704	0.345346	0.835878	0.762654	27113	1
R-HSA-162592	Integration of provirus	1/492	9/10704	0.345346	0.835878	0.762654	3981	1
R-HSA-198203	PI3K/AKT activation	1/492	9/10704	0.345346	0.835878	0.762654	5291	1
R-HSA-212718	EGFR interacts with phospholipase C-gamma	1/492	9/10704	0.345346	0.835878	0.762654	1839	1
R-HSA-2179392	EGFR Transactivation by Gastrin	1/492	9/10704	0.345346	0.835878	0.762654	1839	1
R-HSA-425986	Sodium/Proton exchangers	1/492	9/10704	0.345346	0.835878	0.762654	23315	1
R-HSA-427601	Multifunctional anion exchangers	1/492	9/10704	0.345346	0.835878	0.762654	1836	1
R-HSA-727802	Transport of nucleotide sugars	1/492	9/10704	0.345346	0.835878	0.762654	55343	1
R-HSA-8849469	PTK6 Regulates RTKs and Their Effectors AKT1 and DOK1	1/492	9/10704	0.345346	0.835878	0.762654	1796	1
R-HSA-9020933	Interleukin-23 signaling	1/492	9/10704	0.345346	0.835878	0.762654	51561	1
R-HSA-9029558	NR1H2 & NR1H3 regulate gene expression linked to lipogenesis	1/492	9/10704	0.345346	0.835878	0.762654	6256	1
R-HSA-9623433	NR1H2 & NR1H3 regulate gene expression to control bile acid homeostasis	1/492	9/10704	0.345346	0.835878	0.762654	6256	1
R-HSA-9662834	CD163 mediating an anti-inflammatory response	1/492	9/10704	0.345346	0.835878	0.762654	3569	1
R-HSA-9683673	Maturation of protein 3a	1/492	9/10704	0.345346	0.835878	0.762654	6482	1
R-HSA-9694719	Maturation of protein 3a	1/492	9/10704	0.345346	0.835878	0.762654	6482	1
R-HSA-373755	Semaphorin interactions	4/492	65/10704	0.349857	0.845071	0.771042	4637/2909/27289/23396	4
R-HSA-163200	Respiratory electron transport, ATP synthesis by chemiosmotic coupling, and heat production by uncoupling proteins.	7/492	125/10704	0.351607	0.847573	0.773324	516/4513/4519/4536/4540/4512/4535	7
R-HSA-912526	Interleukin receptor SHC signaling	2/492	27/10704	0.354243	0.85047	0.775968	9846/5291	2
R-HSA-9635486	Infection with Mycobacterium tuberculosis	2/492	27/10704	0.354243	0.85047	0.775968	80824/7097	2
R-HSA-1234176	Oxygen-dependent proline hydroxylation of Hypoxia-inducible Factor Alpha	4/492	66/10704	0.360432	0.854502	0.779647	64344/54583/5696/112398	4
R-HSA-69563	p53-Dependent G1 DNA Damage Response	4/492	66/10704	0.360432	0.854502	0.779647	898/1026/1029/5696	4
R-HSA-69580	p53-Dependent G1/S DNA damage checkpoint	4/492	66/10704	0.360432	0.854502	0.779647	898/1026/1029/5696	4
R-HSA-190828	Gap junction trafficking	3/492	47/10704	0.367676	0.854502	0.779647	2697/10052/71	3
R-HSA-9024446	NR1H2 and NR1H3-mediated signaling	3/492	47/10704	0.367676	0.854502	0.779647	29116/6907/6256	3
R-HSA-72306	tRNA processing	6/492	107/10704	0.369191	0.854502	0.779647	4234/51605/8480/9972/10785/221078	6
R-HSA-73856	RNA Polymerase II Transcription Termination	4/492	67/10704	0.371002	0.854502	0.779647	9984/81608/51585/1479	4
R-HSA-2022854	Keratan sulfate biosynthesis	2/492	28/10704	0.371051	0.854502	0.779647	6482/11041	2
R-HSA-3295583	TRP channels	2/492	28/10704	0.371051	0.854502	0.779647	7220/197259	2
R-HSA-350054	Notch-HLH transcription pathway	2/492	28/10704	0.371051	0.854502	0.779647	9734/6907	2
R-HSA-76071	RNA Polymerase III Transcription Initiation From Type 3 Promoter	2/492	28/10704	0.371051	0.854502	0.779647	5451/7702	2
R-HSA-9619665	EGR2 and SOX10-mediated initiation of Schwann cell myelination	2/492	28/10704	0.371051	0.854502	0.779647	3908/4155	2
R-HSA-9683701	Translation of structural proteins	2/492	28/10704	0.371051	0.854502	0.779647	6482/56965	2
R-HSA-9658195	Leishmania infection	13/492	252/10704	0.374658	0.854502	0.779647	4791/25/4790/3552/3553/79924/3569/3708/147179/10458/3725/71/10628	13
R-HSA-1250342	PI3K events in ERBB4 signaling	1/492	10/10704	0.375462	0.854502	0.779647	1839	1
R-HSA-164940	Nef mediated downregulation of MHC class I complex cell surface expression	1/492	10/10704	0.375462	0.854502	0.779647	130340	1
R-HSA-1855167	Synthesis of pyrophosphates in the cytosol	1/492	10/10704	0.375462	0.854502	0.779647	11163	1
R-HSA-2151209	Activation of PPARGC1A (PGC-1alpha) by phosphorylation	1/492	10/10704	0.375462	0.854502	0.779647	6300	1
R-HSA-381183	ATF6 (ATF6-alpha) activates chaperone genes	1/492	10/10704	0.375462	0.854502	0.779647	1649	1
R-HSA-399997	Acetylcholine regulates insulin secretion	1/492	10/10704	0.375462	0.854502	0.779647	9630	1
R-HSA-418890	Role of second messengers in netrin-1 signaling	1/492	10/10704	0.375462	0.854502	0.779647	7220	1
R-HSA-419812	Calcitonin-like ligand receptors	1/492	10/10704	0.375462	0.854502	0.779647	79924	1
R-HSA-5685939	HDR through MMEJ (alt-NHEJ)	1/492	10/10704	0.375462	0.854502	0.779647	4683	1
R-HSA-74749	Signal attenuation	1/492	10/10704	0.375462	0.854502	0.779647	3643	1
R-HSA-937042	IRAK2 mediated activation of TAK1 complex	1/492	10/10704	0.375462	0.854502	0.779647	3656	1
R-HSA-9683610	Maturation of nucleoprotein	1/492	10/10704	0.375462	0.854502	0.779647	56965	1
R-HSA-9694631	Maturation of nucleoprotein	1/492	10/10704	0.375462	0.854502	0.779647	56965	1
R-HSA-9607240	FLT3 Signaling	15/492	294/10704	0.376096	0.854502	0.779647	9846/5291/5155/57761/208/8649/80824/1839/58489/5519/1848/71/1850/6300/5696	15
R-HSA-2122947	NOTCH1 Intracellular Domain Regulates Transcription	3/492	48/10704	0.380338	0.857066	0.781986	9734/6907/3280	3
R-HSA-418597	G alpha (z) signalling events	3/492	48/10704	0.380338	0.857066	0.781986	5999/8601/5581	3
R-HSA-6806667	Metabolism of fat-soluble vitamins	3/492	48/10704	0.380338	0.857066	0.781986	29914/6385/154807	3
R-HSA-71387	Metabolism of carbohydrates	15/492	295/10704	0.381109	0.857066	0.781986	6482/64132/3340/8480/2027/4126/29940/6385/9972/55501/5519/1836/55454/1464/11041	15
R-HSA-69615	G1/S DNA Damage Checkpoints	4/492	68/10704	0.381561	0.857066	0.781986	898/1026/1029/5696	4
R-HSA-9694516	SARS-CoV-2 Infection	4/492	68/10704	0.381561	0.857066	0.781986	6482/128866/56965/7405	4
R-HSA-1483257	Phospholipid metabolism	11/492	212/10704	0.383844	0.860564	0.785178	5291/8605/57664/56261/50640/8394/25816/79888/56894/126282/23396	11
R-HSA-186763	Downstream signal transduction	2/492	29/10704	0.387681	0.865895	0.790042	5291/5155	2
R-HSA-5218920	VEGFR2 mediated vascular permeability	2/492	29/10704	0.387681	0.865895	0.790042	57761/208	2
R-HSA-8951664	Neddylation	12/492	234/10704	0.390472	0.868433	0.792358	51665/79791/7704/64344/10489/10238/8451/56929/899/54876/9021/5696	12
R-HSA-388841	Costimulation by the CD28 family	4/492	69/10704	0.392099	0.868433	0.792358	57761/208/29126/5519	4
R-HSA-157858	Gap junction trafficking and regulation	3/492	49/10704	0.392945	0.868433	0.792358	2697/10052/71	3
R-HSA-6811440	Retrograde transport at the Trans-Golgi-Network	3/492	49/10704	0.392945	0.868433	0.792358	8677/57589/55275	3
R-HSA-8876198	RAB GEFs exchange GTP for GDP on RABs	5/492	90/10704	0.398539	0.868433	0.792358	208/57589/10981/58485/160518	5
R-HSA-9616222	Transcriptional regulation of granulopoiesis	5/492	90/10704	0.398539	0.868433	0.792358	1026/2313/3570/6886/6256	5
R-HSA-1482839	Acyl chain remodelling of PE	2/492	30/10704	0.404115	0.868433	0.792358	8605/50640	2
R-HSA-418360	Platelet calcium homeostasis	2/492	30/10704	0.404115	0.868433	0.792358	490/3708	2
R-HSA-499943	Interconversion of nucleotide di- and triphosphates	2/492	30/10704	0.404115	0.868433	0.792358	6241/7296	2
R-HSA-1234158	Regulation of gene expression by Hypoxia-inducible Factor	1/492	11/10704	0.404195	0.868433	0.792358	64344	1
R-HSA-1236977	Endosomal/Vacuolar pathway	1/492	11/10704	0.404195	0.868433	0.792358	1520	1
R-HSA-193692	Regulated proteolysis of p75NTR	1/492	11/10704	0.404195	0.868433	0.792358	4790	1
R-HSA-196791	Vitamin D (calciferol) metabolism	1/492	11/10704	0.404195	0.868433	0.792358	7421	1
R-HSA-2586552	Signaling by Leptin	1/492	11/10704	0.404195	0.868433	0.792358	9021	1
R-HSA-351906	Apoptotic cleavage of cell adhesion proteins	1/492	11/10704	0.404195	0.868433	0.792358	1832	1
R-HSA-376172	DSCAM interactions	1/492	11/10704	0.404195	0.868433	0.792358	6300	1
R-HSA-400451	Free fatty acids regulate insulin secretion	1/492	11/10704	0.404195	0.868433	0.792358	9630	1
R-HSA-68689	CDC6 association with the ORC:origin complex	1/492	11/10704	0.404195	0.868433	0.792358	5001	1
R-HSA-77286	mitochondrial fatty acid beta-oxidation of saturated fatty acids	1/492	11/10704	0.404195	0.868433	0.792358	51102	1
R-HSA-9014325	TICAM1,TRAF6-dependent induction of TAK1 complex	1/492	11/10704	0.404195	0.868433	0.792358	148022	1
R-HSA-9645460	Alpha-protein kinase 1 signaling pathway	1/492	11/10704	0.404195	0.868433	0.792358	92610	1
R-HSA-70171	Glycolysis	4/492	71/10704	0.413091	0.878229	0.801295	8480/2027/9972/5519	4
R-HSA-350562	Regulation of ornithine decarboxylase (ODC)	3/492	51/10704	0.417947	0.878229	0.801295	4953/51582/5696	3
R-HSA-168271	Transport of Ribonucleoproteins into the Host Nucleus	2/492	31/10704	0.420335	0.878229	0.801295	8480/9972	2
R-HSA-168333	NEP/NS2 Interacts with the Cellular Export Machinery	2/492	31/10704	0.420335	0.878229	0.801295	8480/9972	2
R-HSA-170822	Regulation of Glucokinase by Glucokinase Regulatory Protein	2/492	31/10704	0.420335	0.878229	0.801295	8480/9972	2
R-HSA-2022928	HS-GAG biosynthesis	2/492	31/10704	0.420335	0.878229	0.801295	3340/6385	2
R-HSA-4641262	Disassembly of the destruction complex and recruitment of AXIN to the membrane	2/492	31/10704	0.420335	0.878229	0.801295	4040/5519	2
R-HSA-5339562	Uptake and actions of bacterial toxins	2/492	31/10704	0.420335	0.878229	0.801295	1839/7296	2
R-HSA-5619107	Defective TPR may confer susceptibility towards thyroid papillary carcinoma (TPC)	2/492	31/10704	0.420335	0.878229	0.801295	8480/9972	2
R-HSA-70268	Pyruvate metabolism	2/492	31/10704	0.420335	0.878229	0.801295	9123/6256	2
R-HSA-1169408	ISG15 antiviral mechanism	4/492	72/10704	0.42353	0.878229	0.801295	8480/9972/51191/11274	4
R-HSA-112308	Presynaptic depolarization and calcium channel opening	1/492	12/10704	0.431609	0.878229	0.801295	773	1
R-HSA-1296346	Tandem pore domain potassium channels	1/492	12/10704	0.431609	0.878229	0.801295	9424	1
R-HSA-1474151	Tetrahydrobiopterin (BH4) synthesis, recycling, salvage and regulation	1/492	12/10704	0.431609	0.878229	0.801295	2643	1
R-HSA-174403	Glutathione synthesis and recycling	1/492	12/10704	0.431609	0.878229	0.801295	2730	1
R-HSA-2197563	NOTCH2 intracellular domain regulates transcription	1/492	12/10704	0.431609	0.878229	0.801295	3280	1
R-HSA-264870	Caspase-mediated cleavage of cytoskeletal proteins	1/492	12/10704	0.431609	0.878229	0.801295	5339	1
R-HSA-381033	ATF6 (ATF6-alpha) activates chaperones	1/492	12/10704	0.431609	0.878229	0.801295	1649	1
R-HSA-71384	Ethanol oxidation	1/492	12/10704	0.431609	0.878229	0.801295	219	1
R-HSA-83936	Transport of nucleosides and free purine and pyrimidine bases across the plasma membrane	1/492	12/10704	0.431609	0.878229	0.801295	2030	1
R-HSA-8851680	Butyrophilin (BTN) family interactions	1/492	12/10704	0.431609	0.878229	0.801295	7498	1
R-HSA-8866427	VLDLR internalisation and degradation	1/492	12/10704	0.431609	0.878229	0.801295	29116	1
R-HSA-9027276	Erythropoietin activates Phosphoinositide-3-kinase (PI3K)	1/492	12/10704	0.431609	0.878229	0.801295	5291	1
R-HSA-9634600	Regulation of glycolysis by fructose 2,6-bisphosphate metabolism	1/492	12/10704	0.431609	0.878229	0.801295	5519	1
R-HSA-9664420	Killing mechanisms	1/492	12/10704	0.431609	0.878229	0.801295	3725	1
R-HSA-9673324	WNT5:FZD7-mediated leishmania damping	1/492	12/10704	0.431609	0.878229	0.801295	3725	1
R-HSA-9673767	Signaling by PDGFRA transmembrane, juxtamembrane and kinase domain mutants	1/492	12/10704	0.431609	0.878229	0.801295	5291	1
R-HSA-9673770	Signaling by PDGFRA extracellular domain mutants	1/492	12/10704	0.431609	0.878229	0.801295	5291	1
R-HSA-2871796	FCERI mediated MAPK activation	2/492	32/10704	0.436327	0.878229	0.801295	2353/3725	2
R-HSA-73863	RNA Polymerase I Transcription Termination	2/492	32/10704	0.436327	0.878229	0.801295	25885/79101	2
R-HSA-983695	Antigen activates B Cell Receptor (BCR) leading to generation of second messengers	2/492	32/10704	0.436327	0.878229	0.801295	7220/3708	2
R-HSA-191859	snRNP Assembly	3/492	53/10704	0.442603	0.878229	0.801295	8480/9972/50628	3
R-HSA-194441	Metabolism of non-coding RNA	3/492	53/10704	0.442603	0.878229	0.801295	8480/9972/50628	3
R-HSA-202733	Cell surface interactions at the vascular wall	7/492	137/10704	0.442665	0.878229	0.801295	6401/5291/285/6385/9123/8793/7056	7
R-HSA-5684996	MAPK1/MAPK3 signaling	14/492	286/10704	0.443482	0.878229	0.801295	5291/5155/8649/80824/1839/3569/58489/5519/1848/3570/71/1850/6300/5696	14
R-HSA-1980143	Signaling by NOTCH1	4/492	74/10704	0.444264	0.878229	0.801295	9734/6907/3280/54492	4
R-HSA-168274	Export of Viral Ribonucleoproteins from Nucleus	2/492	33/10704	0.452076	0.878229	0.801295	8480/9972	2
R-HSA-180746	Nuclear import of Rev protein	2/492	33/10704	0.452076	0.878229	0.801295	8480/9972	2
R-HSA-180910	Vpr-mediated nuclear import of PICs	2/492	33/10704	0.452076	0.878229	0.801295	8480/9972	2
R-HSA-1980145	Signaling by NOTCH2	2/492	33/10704	0.452076	0.878229	0.801295	3280/54492	2
R-HSA-389356	CD28 co-stimulation	2/492	33/10704	0.452076	0.878229	0.801295	57761/208	2
R-HSA-141424	Amplification of signal from the kinetochores	5/492	96/10704	0.453393	0.878229	0.801295	54820/2491/5519/147841/79003	5
R-HSA-141444	Amplification of signal from unattached kinetochores via a MAD2 inhibitory signal	5/492	96/10704	0.453393	0.878229	0.801295	54820/2491/5519/147841/79003	5
R-HSA-1234174	Cellular response to hypoxia	4/492	75/10704	0.454547	0.878229	0.801295	64344/54583/5696/112398	4
R-HSA-159236	Transport of Mature mRNA derived from an Intron-Containing Transcript	4/492	75/10704	0.454547	0.878229	0.801295	9984/8480/9972/10482	4
R-HSA-5633007	Regulation of TP53 Activity	8/492	160/10704	0.455488	0.878229	0.801295	6882/4683/208/5519/1029/6879/6884/1616	8
R-HSA-9609646	HCMV Infection	8/492	160/10704	0.455488	0.878229	0.801295	8480/128866/6907/2146/4790/9972/89853/1616	8
R-HSA-113501	Inhibition of replication initiation of damaged DNA by RB1/E2F1	1/492	13/10704	0.457764	0.878229	0.801295	5519	1
R-HSA-140342	Apoptosis induced DNA fragmentation	1/492	13/10704	0.457764	0.878229	0.801295	3007	1
R-HSA-1502540	Signaling by Activin	1/492	13/10704	0.457764	0.878229	0.801295	10468	1
R-HSA-1679131	Trafficking and processing of endosomal TLR	1/492	13/10704	0.457764	0.878229	0.801295	1520	1
R-HSA-171007	p38MAPK events	1/492	13/10704	0.457764	0.878229	0.801295	6300	1
R-HSA-179812	GRB2 events in EGFR signaling	1/492	13/10704	0.457764	0.878229	0.801295	1839	1
R-HSA-209543	p75NTR recruits signalling complexes	1/492	13/10704	0.457764	0.878229	0.801295	8767	1
R-HSA-400511	Synthesis, secretion, and inactivation of Glucose-dependent Insulinotropic Polypeptide (GIP)	1/492	13/10704	0.457764	0.878229	0.801295	60559	1
R-HSA-5140745	WNT5A-dependent internalization of FZD2, FZD5 and ROR2	1/492	13/10704	0.457764	0.878229	0.801295	4919	1
R-HSA-5607763	CLEC7A (Dectin-1) induces NFAT activation	1/492	13/10704	0.457764	0.878229	0.801295	3708	1
R-HSA-8847993	ERBB2 Activates PTK6 Signaling	1/492	13/10704	0.457764	0.878229	0.801295	1839	1
R-HSA-204998	Cell death signalling via NRAGE, NRIF and NADE	4/492	76/10704	0.464767	0.878229	0.801295	9828/26230/10018/22899	4
R-HSA-5693565	Recruitment and ATM-mediated phosphorylation of repair and signaling proteins at DNA double strand breaks	4/492	76/10704	0.464767	0.878229	0.801295	25/4683/23030/9656	4
R-HSA-174113	SCF-beta-TrCP mediated degradation of Emi1	3/492	55/10704	0.466843	0.878229	0.801295	51343/26271/5696	3
R-HSA-6799198	Complex I biogenesis	3/492	55/10704	0.466843	0.878229	0.801295	4536/4540/4535	3
R-HSA-71406	Pyruvate metabolism and Citric Acid (TCA) cycle	3/492	55/10704	0.466843	0.878229	0.801295	79944/9123/6256	3
R-HSA-8941858	Regulation of RUNX3 expression and activity	3/492	55/10704	0.466843	0.878229	0.801295	864/1029/5696	3
R-HSA-1638074	Keratan sulfate/keratin metabolism	2/492	34/10704	0.467572	0.878229	0.801295	6482/11041	2
R-HSA-165054	Rev-mediated nuclear export of HIV RNA	2/492	34/10704	0.467572	0.878229	0.801295	8480/9972	2
R-HSA-174417	Telomere C-strand (Lagging Strand) Synthesis	2/492	34/10704	0.467572	0.878229	0.801295	25913/80169	2
R-HSA-4085377	SUMOylation of SUMOylation proteins	2/492	34/10704	0.467572	0.878229	0.801295	8480/9972	2
R-HSA-1236975	Antigen processing-Cross presentation	5/492	98/10704	0.471402	0.878229	0.801295	7099/7097/1520/6890/5696	5
R-HSA-5693606	DNA Double Strand Break Response	4/492	77/10704	0.474918	0.878229	0.801295	25/4683/23030/9656	4
R-HSA-202403	TCR signaling	6/492	120/10704	0.476304	0.878229	0.801295	5291/4792/8767/4790/8915/5696	6
R-HSA-9609507	Protein localization	8/492	163/10704	0.476416	0.878229	0.801295	150274/11264/83752/5264/5825/26515/219743/516	8
R-HSA-5578775	Ion homeostasis	3/492	56/10704	0.478787	0.878229	0.801295	490/7220/3708	3
R-HSA-1250347	SHC1 events in ERBB4 signaling	1/492	14/10704	0.482717	0.878229	0.801295	1839	1
R-HSA-162594	Early Phase of HIV Life Cycle	1/492	14/10704	0.482717	0.878229	0.801295	3981	1
R-HSA-166786	Creation of C4 and C2 activators	1/492	14/10704	0.482717	0.878229	0.801295	716	1
R-HSA-180336	SHC1 events in EGFR signaling	1/492	14/10704	0.482717	0.878229	0.801295	1839	1
R-HSA-2024101	CS/DS degradation	1/492	14/10704	0.482717	0.878229	0.801295	1464	1
R-HSA-3656237	Defective EXT2 causes exostoses 2	1/492	14/10704	0.482717	0.878229	0.801295	6385	1
R-HSA-3656253	Defective EXT1 causes exostoses 1, TRPS2 and CHDS	1/492	14/10704	0.482717	0.878229	0.801295	6385	1
R-HSA-418359	Reduction of cytosolic Ca++ levels	1/492	14/10704	0.482717	0.878229	0.801295	490	1
R-HSA-4839735	AXIN mutants destabilize the destruction complex, activating WNT signaling	1/492	14/10704	0.482717	0.878229	0.801295	5519	1
R-HSA-4839744	truncated APC mutants destabilize the destruction complex	1/492	14/10704	0.482717	0.878229	0.801295	5519	1
R-HSA-4839748	AMER1 mutants destabilize the destruction complex	1/492	14/10704	0.482717	0.878229	0.801295	5519	1
R-HSA-5467337	APC truncation mutants have impaired AXIN binding	1/492	14/10704	0.482717	0.878229	0.801295	5519	1
R-HSA-5467340	AXIN missense mutants destabilize the destruction complex	1/492	14/10704	0.482717	0.878229	0.801295	5519	1
R-HSA-5467348	Truncations of AMER1 destabilize the destruction complex	1/492	14/10704	0.482717	0.878229	0.801295	5519	1
R-HSA-5660526	Response to metal ions	1/492	14/10704	0.482717	0.878229	0.801295	4520	1
R-HSA-5682910	LGI-ADAM interactions	1/492	14/10704	0.482717	0.878229	0.801295	59283	1
R-HSA-6803205	TP53 regulates transcription of several additional cell death genes whose specific roles in p53-dependent apoptosis remain uncertain	1/492	14/10704	0.482717	0.878229	0.801295	604	1
R-HSA-6804759	Regulation of TP53 Activity through Association with Co-factors	1/492	14/10704	0.482717	0.878229	0.801295	208	1
R-HSA-8849471	PTK6 Regulates RHO GTPases, RAS GTPase and MAP kinases	1/492	14/10704	0.482717	0.878229	0.801295	2909	1
R-HSA-8964539	Glutamate and glutamine metabolism	1/492	14/10704	0.482717	0.878229	0.801295	57494	1
R-HSA-8983432	Interleukin-15 signaling	1/492	14/10704	0.482717	0.878229	0.801295	9846	1
R-HSA-9005891	Loss of function of MECP2 in Rett syndrome	1/492	14/10704	0.482717	0.878229	0.801295	6907	1
R-HSA-9005895	Pervasive developmental disorders	1/492	14/10704	0.482717	0.878229	0.801295	6907	1
R-HSA-9675151	Disorders of Developmental Biology	1/492	14/10704	0.482717	0.878229	0.801295	6907	1
R-HSA-9697154	Disorders of Nervous System Development	1/492	14/10704	0.482717	0.878229	0.801295	6907	1
R-HSA-3301854	Nuclear Pore Complex (NPC) Disassembly	2/492	35/10704	0.482804	0.878229	0.801295	8480/9972	2
R-HSA-9615710	Late endosomal microautophagy	2/492	35/10704	0.482804	0.878229	0.801295	128866/89853	2
R-HSA-446193	Biosynthesis of the N-glycan precursor (dolichol lipid-linked oligosaccharide, LLO) and transfer to a nascent protein	4/492	78/10704	0.484996	0.880865	0.8037	6482/22845/55343/10195	4
R-HSA-418594	G alpha (i) signalling events	19/492	405/10704	0.497545	0.887354	0.809621	6376/2920/5143/6364/5999/6385/2868/5519/8601/3708/9397/2921/6374/2919/23173/3627/6373/3576/6352	19
R-HSA-167287	HIV elongation arrest and recovery	2/492	36/10704	0.497763	0.887354	0.809621	905/8178	2
R-HSA-167290	Pausing and recovery of HIV elongation	2/492	36/10704	0.497763	0.887354	0.809621	905/8178	2
R-HSA-176033	Interactions of Vpr with host cellular proteins	2/492	36/10704	0.497763	0.887354	0.809621	8480/9972	2
R-HSA-177243	Interactions of Rev with host cellular proteins	2/492	36/10704	0.497763	0.887354	0.809621	8480/9972	2
R-HSA-190861	Gap junction assembly	2/492	36/10704	0.497763	0.887354	0.809621	2697/10052	2
R-HSA-76046	RNA Polymerase III Transcription Initiation	2/492	36/10704	0.497763	0.887354	0.809621	5451/7702	2
R-HSA-9633012	Response of EIF2AK4 (GCN2) to amino acid deficiency	5/492	101/10704	0.498048	0.887354	0.809621	51121/57761/1054/467/1649	5
R-HSA-111447	Activation of BAD and translocation to mitochondria	1/492	15/10704	0.506525	0.887354	0.809621	208	1
R-HSA-193807	Synthesis of bile acids and bile salts via 27-hydroxycholesterol	1/492	15/10704	0.506525	0.887354	0.809621	6256	1
R-HSA-2032785	YAP1- and WWTR1 (TAZ)-stimulated gene expression	1/492	15/10704	0.506525	0.887354	0.809621	1490	1
R-HSA-2691230	Signaling by NOTCH1 HD Domain Mutants in Cancer	1/492	15/10704	0.506525	0.887354	0.809621	54492	1
R-HSA-2691232	Constitutive Signaling by NOTCH1 HD Domain Mutants	1/492	15/10704	0.506525	0.887354	0.809621	54492	1
R-HSA-4839743	phosphorylation site mutants of CTNNB1 are not targeted to the proteasome by the destruction complex	1/492	15/10704	0.506525	0.887354	0.809621	5519	1
R-HSA-5339716	Misspliced GSK3beta mutants stabilize beta-catenin	1/492	15/10704	0.506525	0.887354	0.809621	5519	1
R-HSA-5358747	S33 mutants of beta-catenin aren't phosphorylated	1/492	15/10704	0.506525	0.887354	0.809621	5519	1
R-HSA-5358749	S37 mutants of beta-catenin aren't phosphorylated	1/492	15/10704	0.506525	0.887354	0.809621	5519	1
R-HSA-5358751	S45 mutants of beta-catenin aren't phosphorylated	1/492	15/10704	0.506525	0.887354	0.809621	5519	1
R-HSA-5358752	T41 mutants of beta-catenin aren't phosphorylated	1/492	15/10704	0.506525	0.887354	0.809621	5519	1
R-HSA-5576893	Phase 2 - plateau phase	1/492	15/10704	0.506525	0.887354	0.809621	59283	1
R-HSA-6785631	ERBB2 Regulates Cell Motility	1/492	15/10704	0.506525	0.887354	0.809621	1839	1
R-HSA-8956320	Nucleobase biosynthesis	1/492	15/10704	0.506525	0.887354	0.809621	7372	1
R-HSA-937039	IRAK1 recruits IKK complex	1/492	15/10704	0.506525	0.887354	0.809621	57162	1
R-HSA-975144	IRAK1 recruits IKK complex upon TLR7/8 or 9 stimulation	1/492	15/10704	0.506525	0.887354	0.809621	57162	1
R-HSA-3299685	Detoxification of Reactive Oxygen Species	2/492	37/10704	0.512444	0.893763	0.815468	6648/7296	2
R-HSA-5685938	HDR through Single Strand Annealing (SSA)	2/492	37/10704	0.512444	0.893763	0.815468	25/4683	2
R-HSA-9029569	NR1H3 & NR1H2 regulate gene expression linked to cholesterol transport and efflux	2/492	37/10704	0.512444	0.893763	0.815468	6907/6256	2
R-HSA-5676590	NIK-->noncanonical NF-kB signaling	3/492	59/10704	0.513835	0.894873	0.816481	4791/5971/5696	3
R-HSA-9679506	SARS-CoV Infections	7/492	147/10704	0.516963	0.899	0.820247	6482/128866/56965/3460/3570/29110/7405	7
R-HSA-2871837	FCERI mediated NF-kB activation	4/492	82/10704	0.524481	0.900542	0.821653	4792/4790/8915/5696	4
R-HSA-187577	SCF(Skp2)-mediated degradation of p27/p21	3/492	60/10704	0.525237	0.900542	0.821653	898/1026/5696	3
R-HSA-5607761	Dectin-1 mediated noncanonical NF-kB signaling	3/492	60/10704	0.525237	0.900542	0.821653	4791/5971/5696	3
R-HSA-3232142	SUMOylation of ubiquitinylation proteins	2/492	38/10704	0.526839	0.900542	0.821653	8480/9972	2
R-HSA-139853	Elevation of cytosolic Ca2+ levels	1/492	16/10704	0.529239	0.900542	0.821653	3708	1
R-HSA-159418	Recycling of bile acids and salts	1/492	16/10704	0.529239	0.900542	0.821653	6256	1
R-HSA-1963640	GRB2 events in ERBB2 signaling	1/492	16/10704	0.529239	0.900542	0.821653	1839	1
R-HSA-1963642	PI3K events in ERBB2 signaling	1/492	16/10704	0.529239	0.900542	0.821653	1839	1
R-HSA-204174	Regulation of pyruvate dehydrogenase (PDH) complex	1/492	16/10704	0.529239	0.900542	0.821653	6256	1
R-HSA-210744	Regulation of gene expression in late stage (branching morphogenesis) pancreatic bud precursor cells	1/492	16/10704	0.529239	0.900542	0.821653	3280	1
R-HSA-2559584	Formation of Senescence-Associated Heterochromatin Foci (SAHF)	1/492	16/10704	0.529239	0.900542	0.821653	3007	1
R-HSA-418457	cGMP effects	1/492	16/10704	0.529239	0.900542	0.821653	3708	1
R-HSA-429958	mRNA decay by 3' to 5' exoribonuclease	1/492	16/10704	0.529239	0.900542	0.821653	5393	1
R-HSA-5684264	MAP3K8 (TPL2)-dependent MAPK1/3 activation	1/492	16/10704	0.529239	0.900542	0.821653	4790	1
R-HSA-8949664	Processing of SMDT1	1/492	16/10704	0.529239	0.900542	0.821653	10730	1
R-HSA-1236974	ER-Phagosome pathway	4/492	83/10704	0.534125	0.906256	0.826867	7099/7097/6890/5696	4
R-HSA-69202	Cyclin E associated events during G1/S transition	4/492	83/10704	0.534125	0.906256	0.826867	898/208/1026/5696	4
R-HSA-6798695	Neutrophil degranulation	22/492	480/10704	0.537817	0.911215	0.831392	5329/7133/1832/80331/8649/4790/4126/25801/7130/57826/22918/7097/11010/79888/23218/1520/2919/5049/58485/116844/124583/25840	22
R-HSA-140877	Formation of Fibrin Clot (Clotting Cascade)	2/492	39/10704	0.540944	0.913903	0.833844	5270/7056	2
R-HSA-5693616	Presynaptic phase of homologous DNA pairing and strand exchange	2/492	39/10704	0.540944	0.913903	0.833844	4683/675	2
R-HSA-114608	Platelet degranulation	6/492	129/10704	0.547363	0.917667	0.837278	5155/10184/78991/23052/7273/308	6
R-HSA-1482922	Acyl chain remodelling of PI	1/492	17/10704	0.550909	0.917667	0.837278	8605	1
R-HSA-174437	Removal of the Flap Intermediate from the C-strand	1/492	17/10704	0.550909	0.917667	0.837278	25913	1
R-HSA-180292	GAB1 signalosome	1/492	17/10704	0.550909	0.917667	0.837278	1839	1
R-HSA-196299	Beta-catenin phosphorylation cascade	1/492	17/10704	0.550909	0.917667	0.837278	5519	1
R-HSA-3781860	Diseases associated with N-glycosylation of proteins	1/492	17/10704	0.550909	0.917667	0.837278	10195	1
R-HSA-432142	Platelet sensitization by LDL	1/492	17/10704	0.550909	0.917667	0.837278	5519	1
R-HSA-450604	KSRP (KHSRP) binds and destabilizes mRNA	1/492	17/10704	0.550909	0.917667	0.837278	5393	1
R-HSA-4655427	SUMOylation of DNA methylation proteins	1/492	17/10704	0.550909	0.917667	0.837278	8535	1
R-HSA-9022699	MECP2 regulates neuronal receptors and channels	1/492	17/10704	0.550909	0.917667	0.837278	5770	1
R-HSA-76002	Platelet activation, signaling and aggregation	12/492	263/10704	0.552921	0.918911	0.838413	5291/5155/1609/10184/78991/23052/3708/7273/9630/308/5581/5770	12
R-HSA-1483166	Synthesis of PA	2/492	40/10704	0.554755	0.918911	0.838413	79888/56894	2
R-HSA-168276	NS1 Mediated Effects on Host Pathways	2/492	40/10704	0.554755	0.918911	0.838413	8480/9972	2
R-HSA-5674135	MAP2K and MAPK activation	2/492	40/10704	0.554755	0.918911	0.838413	8649/71	2
R-HSA-8957275	Post-translational protein phosphorylation	5/492	108/10704	0.55805	0.920031	0.839435	54972/3569/3484/56975/1435	5
R-HSA-446219	Synthesis of substrates in N-glycan biosythesis	3/492	63/10704	0.558535	0.920031	0.839435	6482/22845/55343	3
R-HSA-9033241	Peroxisomal protein import	3/492	63/10704	0.558535	0.920031	0.839435	83752/5264/219743	3
R-HSA-913709	O-linked glycosylation of mucins	3/492	63/10704	0.558535	0.920031	0.839435	6482/84002/2650	3
R-HSA-5689880	Ub-specific processing proteases	10/492	220/10704	0.560666	0.92226	0.841469	330/1540/4792/329/64135/25862/367/4086/11274/5696	10
R-HSA-1268020	Mitochondrial protein import	3/492	64/10704	0.569317	0.926092	0.844965	150274/26515/516	3
R-HSA-111471	Apoptotic factor-mediated response	1/492	18/10704	0.571584	0.926092	0.844965	1029	1
R-HSA-1369062	ABC transporters in lipid homeostasis	1/492	18/10704	0.571584	0.926092	0.844965	5825	1
R-HSA-162710	Synthesis of glycosylphosphatidylinositol (GPI)	1/492	18/10704	0.571584	0.926092	0.844965	93183	1
R-HSA-163210	Formation of ATP by chemiosmotic coupling	1/492	18/10704	0.571584	0.926092	0.844965	516	1
R-HSA-1839117	Signaling by cytosolic FGFR1 fusion mutants	1/492	18/10704	0.571584	0.926092	0.844965	9846	1
R-HSA-190840	Microtubule-dependent trafficking of connexons from Golgi to the plasma membrane	1/492	18/10704	0.571584	0.926092	0.844965	2697	1
R-HSA-446353	Cell-extracellular matrix interactions	1/492	18/10704	0.571584	0.926092	0.844965	71	1
R-HSA-5609975	Diseases associated with glycosylation precursor biosynthesis	1/492	18/10704	0.571584	0.926092	0.844965	22845	1
R-HSA-6804114	TP53 Regulates Transcription of Genes Involved in G2 Cell Cycle Arrest	1/492	18/10704	0.571584	0.926092	0.844965	1647	1
R-HSA-881907	Gastrin-CREB signalling pathway via PKC and MAPK	1/492	18/10704	0.571584	0.926092	0.844965	1839	1
R-HSA-450531	Regulation of mRNA stability by proteins that bind AU-rich elements	4/492	88/10704	0.580814	0.939763	0.857438	5393/677/5696/55802	4
R-HSA-76005	Response to elevated platelet cytosolic Ca2+	6/492	134/10704	0.584932	0.944275	0.861555	5155/10184/78991/23052/7273/308	6
R-HSA-5687128	MAPK6/MAPK4 signaling	4/492	89/10704	0.589826	0.944275	0.861555	10435/2308/3725/5696	4
R-HSA-1482925	Acyl chain remodelling of PG	1/492	19/10704	0.591309	0.944275	0.861555	79888	1
R-HSA-174414	Processive synthesis on the C-strand of the telomere	1/492	19/10704	0.591309	0.944275	0.861555	25913	1
R-HSA-190872	Transport of connexons to the plasma membrane	1/492	19/10704	0.591309	0.944275	0.861555	2697	1
R-HSA-197264	Nicotinamide salvaging	1/492	19/10704	0.591309	0.944275	0.861555	56965	1
R-HSA-5576886	Phase 4 - resting membrane potential	1/492	19/10704	0.591309	0.944275	0.861555	9424	1
R-HSA-74259	Purine catabolism	1/492	19/10704	0.591309	0.944275	0.861555	7498	1
R-HSA-888590	GABA synthesis, release, reuptake and degradation	1/492	19/10704	0.591309	0.944275	0.861555	80331	1
R-HSA-9609690	HCMV Early Events	6/492	135/10704	0.592253	0.944275	0.861555	8480/6907/2146/4790/9972/1616	6
R-HSA-1489509	DAG and IP3 signaling	2/492	43/10704	0.594401	0.944275	0.861555	3708/5581	2
R-HSA-168325	Viral Messenger RNA Synthesis	2/492	43/10704	0.594401	0.944275	0.861555	8480/9972	2
R-HSA-5362517	Signaling by Retinoic Acid	2/492	43/10704	0.594401	0.944275	0.861555	1374/6256	2
R-HSA-69618	Mitotic Spindle Checkpoint	5/492	113/10704	0.598643	0.944275	0.861555	54820/2491/5519/147841/79003	5
R-HSA-5685942	HDR through Homologous Recombination (HRR)	3/492	67/10704	0.600673	0.944275	0.861555	79728/4683/675	3
R-HSA-6802952	Signaling by BRAF and RAF fusions	3/492	67/10704	0.600673	0.944275	0.861555	56829/10018/71	3
R-HSA-425397	Transport of vitamins, nucleosides, and related molecules	2/492	44/10704	0.607017	0.944275	0.861555	2030/55343	2
R-HSA-451927	Interleukin-2 family signaling	2/492	44/10704	0.607017	0.944275	0.861555	9846/5291	2
R-HSA-6811438	Intra-Golgi traffic	2/492	44/10704	0.607017	0.944275	0.861555	9265/57589	2
R-HSA-9694635	Translation of structural proteins	2/492	44/10704	0.607017	0.944275	0.861555	6482/56965	2
R-HSA-69052	Switching of origins to a post-replicative state	4/492	91/10704	0.607504	0.944275	0.861555	898/51343/5001/5696	4
R-HSA-70326	Glucose metabolism	4/492	91/10704	0.607504	0.944275	0.861555	8480/2027/9972/5519	4
R-HSA-1852241	Organelle biogenesis and maintenance	13/492	296/10704	0.607909	0.944275	0.861555	54820/4208/6907/90410/6648/79969/516/9657/9662/80254/6256/6300/92482	13
R-HSA-167044	Signalling to RAS	1/492	20/10704	0.610128	0.944275	0.861555	6300	1
R-HSA-176407	Conversion from APC/C:Cdc20 to APC/C:Cdh1 in late anaphase	1/492	20/10704	0.610128	0.944275	0.861555	51343	1
R-HSA-3232118	SUMOylation of transcription factors	1/492	20/10704	0.610128	0.944275	0.861555	1029	1
R-HSA-381771	Synthesis, secretion, and inactivation of Glucagon-like Peptide-1 (GLP-1)	1/492	20/10704	0.610128	0.944275	0.861555	60559	1
R-HSA-5625900	RHO GTPases activate CIT	1/492	20/10704	0.610128	0.944275	0.861555	4637	1
R-HSA-5627117	RHO GTPases Activate ROCKs	1/492	20/10704	0.610128	0.944275	0.861555	4637	1
R-HSA-8978934	Metabolism of cofactors	1/492	20/10704	0.610128	0.944275	0.861555	2643	1
R-HSA-9013695	NOTCH4 Intracellular Domain Regulates Transcription	1/492	20/10704	0.610128	0.944275	0.861555	3280	1
R-HSA-9687136	Aberrant regulation of mitotic exit in cancer due to RB1 defects	1/492	20/10704	0.610128	0.944275	0.861555	51343	1
R-HSA-3247509	Chromatin modifying enzymes	12/492	274/10704	0.610673	0.944275	0.861555	23210/54556/4791/6907/2146/4790/10902/80314/23030/23135/7403/22992	12
R-HSA-4839726	Chromatin organization	12/492	274/10704	0.610673	0.944275	0.861555	23210/54556/4791/6907/2146/4790/10902/80314/23030/23135/7403/22992	12
R-HSA-5688426	Deubiquitination	13/492	297/10704	0.612812	0.946348	0.863447	330/1540/57506/4792/8767/329/64135/7128/25862/367/4086/11274/5696	13
R-HSA-194840	Rho GTPase cycle	6/492	138/10704	0.613803	0.946645	0.863718	4649/85360/9828/26230/2909/22899	6
R-HSA-6804756	Regulation of TP53 Activity through Phosphorylation	4/492	92/10704	0.616166	0.949056	0.865918	6882/4683/6879/6884	4
R-HSA-3899300	SUMOylation of transcription cofactors	2/492	45/10704	0.619333	0.949911	0.866698	8535/1616	2
R-HSA-4615885	SUMOylation of DNA replication proteins	2/492	45/10704	0.619333	0.949911	0.866698	8480/9972	2
R-HSA-69242	S Phase	7/492	162/10704	0.620675	0.949911	0.866698	994/898/208/51343/1026/5001/5696	7
R-HSA-3371453	Regulation of HSF1-mediated heat shock response	3/492	69/10704	0.620726	0.949911	0.866698	8480/9972/51182	3
R-HSA-5693571	Nonhomologous End-Joining (NHEJ)	3/492	69/10704	0.620726	0.949911	0.866698	4683/9656/3981	3
R-HSA-5663220	RHO GTPases Activate Formins	6/492	140/10704	0.627811	0.95622	0.872454	54820/2491/5519/147841/79003/71	6
R-HSA-164938	Nef-mediates down modulation of cell surface receptors by recruiting them to clathrin adapters	1/492	21/10704	0.628081	0.95622	0.872454	130340	1
R-HSA-5218921	VEGFR2 mediated cell proliferation	1/492	21/10704	0.628081	0.95622	0.872454	3708	1
R-HSA-9648025	EML4 and NUDC in mitotic spindle formation	5/492	117/10704	0.62956	0.95622	0.872454	54820/2491/5519/147841/79003	5
R-HSA-174824	Plasma lipoprotein assembly, remodeling, and clearance	3/492	70/10704	0.630492	0.95622	0.872454	29116/3988/26119	3
R-HSA-380259	Loss of Nlp from mitotic centrosomes	3/492	70/10704	0.630492	0.95622	0.872454	54820/9662/80254	3
R-HSA-380284	Loss of proteins required for interphase microtubule organization from the centrosome	3/492	70/10704	0.630492	0.95622	0.872454	54820/9662/80254	3
R-HSA-8854214	TBC/RABGAPs	2/492	46/10704	0.631349	0.956262	0.872493	54662/125058	2
R-HSA-1474244	Extracellular matrix organization	13/492	301/10704	0.632133	0.956262	0.872493	3909/3918/3383/5155/6385/8200/3911/871/7412/1520/5339/3908/3914	13
R-HSA-3214841	PKMTs methylate histone lysines	3/492	71/10704	0.640084	0.964967	0.880435	4791/2146/4790	3
R-HSA-4551638	SUMOylation of chromatin organization proteins	3/492	71/10704	0.640084	0.964967	0.880435	8480/9972/8535	3
R-HSA-5673001	RAF/MAP kinase cascade	12/492	280/10704	0.64064	0.964967	0.880435	5291/5155/8649/80824/1839/58489/5519/1848/71/1850/6300/5696	12
R-HSA-73762	RNA Polymerase I Transcription Initiation	2/492	47/10704	0.643068	0.964967	0.880435	25885/79101	2
R-HSA-2024096	HS-GAG degradation	1/492	22/10704	0.64521	0.964967	0.880435	6385	1
R-HSA-2979096	NOTCH2 Activation and Transmission of Signal to the Nucleus	1/492	22/10704	0.64521	0.964967	0.880435	54492	1
R-HSA-392154	Nitric oxide stimulates guanylate cyclase	1/492	22/10704	0.64521	0.964967	0.880435	3708	1
R-HSA-912631	Regulation of signaling by CBL	1/492	22/10704	0.64521	0.964967	0.880435	5291	1
R-HSA-9665686	Signaling by ERBB2 TMD/JMD mutants	1/492	22/10704	0.64521	0.964967	0.880435	1839	1
R-HSA-5693532	DNA Double-Strand Break Repair	7/492	166/10704	0.646193	0.96522	0.880666	79728/25/4683/23030/9656/675/3981	7
R-HSA-3781865	Diseases of glycosylation	6/492	143/10704	0.648263	0.967094	0.882376	6385/1836/1464/11041/22845/10195	6
R-HSA-1445148	Translocation of SLC2A4 (GLUT4) to the plasma membrane	3/492	72/10704	0.649499	0.967447	0.882698	208/9882/71	3
R-HSA-167152	Formation of HIV elongation complex in the absence of HIV Tat	2/492	48/10704	0.654491	0.967447	0.882698	905/8178	2
R-HSA-512988	Interleukin-3, Interleukin-5 and GM-CSF signaling	2/492	48/10704	0.654491	0.967447	0.882698	9846/5291	2
R-HSA-212300	PRC2 methylates histones and DNA	3/492	73/10704	0.658738	0.967447	0.882698	3720/2146/5252	3
R-HSA-69017	CDK-mediated phosphorylation and removal of Cdc6	3/492	73/10704	0.658738	0.967447	0.882698	898/51343/5696	3
R-HSA-8854518	AURKA Activation by TPX2	3/492	73/10704	0.658738	0.967447	0.882698	54820/9662/80254	3
R-HSA-140837	Intrinsic Pathway of Fibrin Clot Formation	1/492	23/10704	0.661551	0.967447	0.882698	5270	1
R-HSA-166663	Initial triggering of complement	1/492	23/10704	0.661551	0.967447	0.882698	716	1
R-HSA-171319	Telomere Extension By Telomerase	1/492	23/10704	0.661551	0.967447	0.882698	25913	1
R-HSA-373753	Nephrin family interactions	1/492	23/10704	0.661551	0.967447	0.882698	5291	1
R-HSA-389948	PD-1 signaling	1/492	23/10704	0.661551	0.967447	0.882698	29126	1
R-HSA-400508	Incretin synthesis, secretion, and inactivation	1/492	23/10704	0.661551	0.967447	0.882698	60559	1
R-HSA-5620922	BBSome-mediated cargo-targeting to cilium	1/492	23/10704	0.661551	0.967447	0.882698	92482	1
R-HSA-73980	RNA Polymerase III Transcription Termination	1/492	23/10704	0.661551	0.967447	0.882698	4782	1
R-HSA-8949215	Mitochondrial calcium ion transport	1/492	23/10704	0.661551	0.967447	0.882698	10730	1
R-HSA-9637690	Response of Mtb to phagocytosis	1/492	23/10704	0.661551	0.967447	0.882698	80824	1
R-HSA-5619102	SLC transporter disorders	4/492	98/10704	0.665582	0.969811	0.884855	8480/9972/1836/55343	4
R-HSA-5620912	Anchoring of the basal body to the plasma membrane	4/492	98/10704	0.665582	0.969811	0.884855	54820/9657/9662/80254	4
R-HSA-9012852	Signaling by NOTCH3	2/492	49/10704	0.665621	0.969811	0.884855	3280/54492	2
R-HSA-8856828	Clathrin-mediated endocytosis	6/492	146/10704	0.668021	0.972113	0.886955	55738/1839/26119/3575/71/23396	6
R-HSA-373752	Netrin-1 signaling	2/492	50/10704	0.67646	0.973442	0.888167	7220/6300	2
R-HSA-2219530	Constitutive Signaling by Aberrant PI3K in Cancer	3/492	75/10704	0.676686	0.973442	0.888167	5291/5155/1839	3
R-HSA-156584	Cytosolic sulfonation of small molecules	1/492	24/10704	0.677141	0.973442	0.888167	1836	1
R-HSA-193368	Synthesis of bile acids and bile salts via 7alpha-hydroxycholesterol	1/492	24/10704	0.677141	0.973442	0.888167	6256	1
R-HSA-203927	MicroRNA (miRNA) biogenesis	1/492	24/10704	0.677141	0.973442	0.888167	54487	1
R-HSA-210500	Glutamate Neurotransmitter Release Cycle	1/492	24/10704	0.677141	0.973442	0.888167	54407	1
R-HSA-428930	Thromboxane signalling through TP receptor	1/492	24/10704	0.677141	0.973442	0.888167	9630	1
R-HSA-429947	Deadenylation of mRNA	1/492	24/10704	0.677141	0.973442	0.888167	9924	1
R-HSA-5627123	RHO GTPases activate PAKs	1/492	24/10704	0.677141	0.973442	0.888167	4637	1
R-HSA-977068	Termination of O-glycan biosynthesis	1/492	24/10704	0.677141	0.973442	0.888167	6482	1
R-HSA-3000178	ECM proteoglycans	3/492	76/10704	0.685395	0.977433	0.891808	3909/3911/3908	3
R-HSA-381426	Regulation of Insulin-like Growth Factor (IGF) transport and uptake by Insulin-like Growth Factor Binding Proteins (IGFBPs)	5/492	125/10704	0.686882	0.977433	0.891808	54972/3569/3484/56975/1435	5
R-HSA-112310	Neurotransmitter release cycle	2/492	51/10704	0.687011	0.977433	0.891808	80331/54407	2
R-HSA-180786	Extension of Telomeres	2/492	51/10704	0.687011	0.977433	0.891808	25913/80169	2
R-HSA-6811436	COPI-independent Golgi-to-ER retrograde traffic	2/492	51/10704	0.687011	0.977433	0.891808	56894/5049	2
R-HSA-212165	Epigenetic regulation of gene expression	6/492	149/10704	0.687064	0.977433	0.891808	3720/25885/2146/5252/79101/200424	6
R-HSA-1643713	Signaling by EGFR in Cancer	1/492	25/10704	0.692014	0.977433	0.891808	1839	1
R-HSA-210991	Basigin interactions	1/492	25/10704	0.692014	0.977433	0.891808	9123	1
R-HSA-392451	G beta:gamma signalling through PI3Kgamma	1/492	25/10704	0.692014	0.977433	0.891808	208	1
R-HSA-418592	ADP signalling through P2Y purinoceptor 1	1/492	25/10704	0.692014	0.977433	0.891808	9630	1
R-HSA-9006335	Signaling by Erythropoietin	1/492	25/10704	0.692014	0.977433	0.891808	5291	1
R-HSA-9013507	NOTCH3 Activation and Transmission of Signal to the Nucleus	1/492	25/10704	0.692014	0.977433	0.891808	54492	1
R-HSA-9013508	NOTCH3 Intracellular Domain Regulates Transcription	1/492	25/10704	0.692014	0.977433	0.891808	3280	1
R-HSA-9664565	Signaling by ERBB2 KD Mutants	1/492	25/10704	0.692014	0.977433	0.891808	1839	1
R-HSA-9018519	Estrogen-dependent gene expression	6/492	150/10704	0.693251	0.977433	0.891808	23030/5451/2353/51523/7764/3725	6
R-HSA-2500257	Resolution of Sister Chromatid Cohesion	5/492	126/10704	0.693608	0.977433	0.891808	54820/2491/5519/147841/79003	5
R-HSA-9009391	Extra-nuclear estrogen signaling	3/492	77/10704	0.693928	0.977433	0.891808	208/1839/2353	3
R-HSA-2980766	Nuclear Envelope Breakdown	2/492	52/10704	0.697279	0.980988	0.895052	8480/9972	2
R-HSA-422356	Regulation of insulin secretion	3/492	78/10704	0.702285	0.985362	0.899043	773/3708/9630	3
R-HSA-69620	Cell Cycle Checkpoints	12/492	294/10704	0.70557	0.985362	0.899043	54820/2491/4683/898/1026/9656/5519/1029/147841/5001/79003/5696	12
R-HSA-1227990	Signaling by ERBB2 in Cancer	1/492	26/10704	0.706204	0.985362	0.899043	1839	1
R-HSA-2173788	Downregulation of TGF-beta receptor signaling	1/492	26/10704	0.706204	0.985362	0.899043	23645	1
R-HSA-3238698	WNT ligand biogenesis and trafficking	1/492	26/10704	0.706204	0.985362	0.899043	7482	1
R-HSA-5223345	Miscellaneous transport and binding events	1/492	26/10704	0.706204	0.985362	0.899043	123606	1
R-HSA-77387	Insulin receptor recycling	1/492	26/10704	0.706204	0.985362	0.899043	3643	1
R-HSA-169911	Regulation of Apoptosis	2/492	53/10704	0.707266	0.985684	0.899337	115209/5696	2
R-HSA-2187338	Visual phototransduction	4/492	104/10704	0.71048	0.989001	0.902364	6385/2868/9397/23173	4
R-HSA-1483206	Glycerophospholipid biosynthesis	5/492	129/10704	0.713189	0.989122	0.902474	8605/56261/50640/79888/56894	5
R-HSA-5576891	Cardiac conduction	5/492	129/10704	0.713189	0.989122	0.902474	490/9424/59283/7220/3708	5
R-HSA-416482	G alpha (12/13) signalling events	3/492	80/10704	0.718476	0.989122	0.902474	9828/26230/22899	3
R-HSA-1538133	G0 and Early G1	1/492	27/10704	0.719741	0.989122	0.902474	898	1
R-HSA-167160	RNA Pol II CTD phosphorylation and interaction with CE during HIV infection	1/492	27/10704	0.719741	0.989122	0.902474	8731	1
R-HSA-211976	Endogenous sterols	1/492	27/10704	0.719741	0.989122	0.902474	6256	1
R-HSA-3000170	Syndecan interactions	1/492	27/10704	0.719741	0.989122	0.902474	6385	1
R-HSA-354192	Integrin signaling	1/492	27/10704	0.719741	0.989122	0.902474	5770	1
R-HSA-5621480	Dectin-2 family	1/492	27/10704	0.719741	0.989122	0.902474	26253	1
R-HSA-77075	RNA Pol II CTD phosphorylation and interaction with CE	1/492	27/10704	0.719741	0.989122	0.902474	8731	1
R-HSA-9648002	RAS processing	1/492	27/10704	0.719741	0.989122	0.902474	58489	1
R-HSA-176408	Regulation of APC/C activators between G1/S and early anaphase	3/492	81/10704	0.726312	0.993235	0.906226	51343/26271/5696	3
R-HSA-9679191	Potential therapeutics for SARS	3/492	81/10704	0.726312	0.993235	0.906226	3460/3570/29110	3
R-HSA-3371497	HSP90 chaperone cycle for steroid hormone receptors (SHR)	2/492	55/10704	0.726416	0.993235	0.906226	3301/367	2
R-HSA-9639288	Amino acids regulate mTORC1	2/492	55/10704	0.726416	0.993235	0.906226	8649/83667	2
R-HSA-9006931	Signaling by Nuclear Receptors	12/492	299/10704	0.72692	0.993235	0.906226	29116/6907/208/1374/1839/23030/5451/2353/51523/7764/3725/6256	12
R-HSA-5693567	HDR through Homologous Recombination (HRR) or Single Strand Annealing (SSA)	5/492	132/10704	0.731873	0.997132	0.909782	79728/25/4683/9656/675	5
R-HSA-1483191	Synthesis of PC	1/492	28/10704	0.732655	0.997132	0.909782	79888	1
R-HSA-164952	The role of Nef in HIV-1 replication and disease pathogenesis	1/492	28/10704	0.732655	0.997132	0.909782	130340	1
R-HSA-380270	Recruitment of mitotic centrosome proteins and complexes	3/492	82/10704	0.733976	0.997132	0.909782	54820/9662/80254	3
R-HSA-380287	Centrosome maturation	3/492	82/10704	0.733976	0.997132	0.909782	54820/9662/80254	3
R-HSA-432722	Golgi Associated Vesicle Biogenesis	2/492	56/10704	0.735587	0.998177	0.910736	9685/130340	2
R-HSA-163685	Integration of energy metabolism	4/492	108/10704	0.737877	0.999481	0.911926	5519/773/3708/9630	4
R-HSA-447115	Interleukin-12 family signaling	2/492	57/10704	0.744496	0.999481	0.911926	51561/6648	2
R-HSA-6784531	tRNA processing in the nucleus	2/492	57/10704	0.744496	0.999481	0.911926	8480/9972	2
R-HSA-69541	Stabilization of p53	2/492	57/10704	0.744496	0.999481	0.911926	1029/5696	2
R-HSA-380972	Energy dependent regulation of mTOR by LKB1-AMPK	1/492	29/10704	0.744976	0.999481	0.911926	8649	1
R-HSA-390918	Peroxisomal lipid metabolism	1/492	29/10704	0.744976	0.999481	0.911926	5264	1
R-HSA-5601884	PIWI-interacting RNA (piRNA) biogenesis	1/492	29/10704	0.744976	0.999481	0.911926	4603	1
R-HSA-5683826	Surfactant metabolism	1/492	29/10704	0.744976	0.999481	0.911926	29080	1
R-HSA-72086	mRNA Capping	1/492	29/10704	0.744976	0.999481	0.911926	8731	1
R-HSA-9694548	Maturation of spike protein	1/492	29/10704	0.744976	0.999481	0.911926	6482	1
R-HSA-186797	Signaling by PDGF	2/492	58/10704	0.753146	1	0.912399	5291/5155	2
R-HSA-110314	Recognition of DNA damage by PCNA-containing replication complex	1/492	30/10704	0.75673	1	0.912399	8451	1
R-HSA-2424491	DAP12 signaling	1/492	30/10704	0.75673	1	0.912399	5291	1
R-HSA-6804758	Regulation of TP53 Activity through Acetylation	1/492	30/10704	0.75673	1	0.912399	208	1
R-HSA-5173105	O-linked glycosylation	4/492	111/10704	0.757109	1	0.912399	6482/11041/84002/2650	4
R-HSA-68827	CDT1 association with the CDC6:ORC:origin complex	2/492	59/10704	0.761543	1	0.912399	5001/5696	2
R-HSA-8866654	E3 ubiquitin ligases ubiquitinate target proteins	2/492	59/10704	0.761543	1	0.912399	51322/8915	2
R-HSA-5693538	Homology Directed Repair	5/492	138/10704	0.766559	1	0.912399	79728/25/4683/9656/675	5
R-HSA-182971	EGFR downregulation	1/492	31/10704	0.767943	1	0.912399	1839	1
R-HSA-1839124	FGFR1 mutant receptor activation	1/492	31/10704	0.767943	1	0.912399	9846	1
R-HSA-196807	Nicotinate metabolism	1/492	31/10704	0.767943	1	0.912399	56965	1
R-HSA-2122948	Activated NOTCH1 Transmits Signal to the Nucleus	1/492	31/10704	0.767943	1	0.912399	54492	1
R-HSA-399719	Trafficking of AMPA receptors	1/492	31/10704	0.767943	1	0.912399	59283	1
R-HSA-399721	Glutamate binding, activation of AMPA receptors and synaptic plasticity	1/492	31/10704	0.767943	1	0.912399	59283	1
R-HSA-445095	Interaction between L1 and Ankyrins	1/492	31/10704	0.767943	1	0.912399	71	1
R-HSA-8949613	Cristae formation	1/492	31/10704	0.767943	1	0.912399	516	1
R-HSA-9668328	Sealing of the nuclear envelope (NE) by ESCRT-III	1/492	31/10704	0.767943	1	0.912399	128866	1
R-HSA-5419276	Mitochondrial translation termination	3/492	87/10704	0.76978	1	0.912399	10573/51264/92399	3
R-HSA-174143	APC/C-mediated degradation of cell cycle proteins	3/492	88/10704	0.77645	1	0.912399	51343/26271/5696	3
R-HSA-2565942	Regulation of PLK1 Activity at G2/M Transition	3/492	88/10704	0.77645	1	0.912399	54820/9662/80254	3
R-HSA-418346	Platelet homeostasis	3/492	88/10704	0.77645	1	0.912399	490/5519/3708	3
R-HSA-453276	Regulation of mitotic cell cycle	3/492	88/10704	0.77645	1	0.912399	51343/26271/5696	3
R-HSA-1474228	Degradation of the extracellular matrix	5/492	140/10704	0.777336	1	0.912399	3909/3918/3911/1520/3914	5
R-HSA-112382	Formation of RNA Pol II elongation complex	2/492	61/10704	0.777597	1	0.912399	905/8178	2
R-HSA-75955	RNA Polymerase II Transcription Elongation	2/492	61/10704	0.777597	1	0.912399	905/8178	2
R-HSA-1251985	Nuclear signaling by ERBB4	1/492	32/10704	0.77864	1	0.912399	1839	1
R-HSA-2173789	TGF-beta receptor signaling activates SMADs	1/492	32/10704	0.77864	1	0.912399	23645	1
R-HSA-397795	G-protein beta:gamma signalling	1/492	32/10704	0.77864	1	0.912399	208	1
R-HSA-456926	Thrombin signalling through proteinase activated receptors (PARs)	1/492	32/10704	0.77864	1	0.912399	9630	1
R-HSA-5626467	RHO GTPases activate IQGAPs	1/492	32/10704	0.77864	1	0.912399	71	1
R-HSA-3371556	Cellular response to heat stress	3/492	89/10704	0.78296	1	0.912399	8480/9972/51182	3
R-HSA-9610379	HCMV Late Events	4/492	116/10704	0.786716	1	0.912399	8480/128866/9972/89853	4
R-HSA-2871809	FCERI mediated Ca+2 mobilization	1/492	33/10704	0.788845	1	0.912399	3708	1
R-HSA-352230	Amino acid transport across the plasma membrane	1/492	33/10704	0.788845	1	0.912399	54407	1
R-HSA-392518	Signal amplification	1/492	33/10704	0.788845	1	0.912399	9630	1
R-HSA-4085001	Sialic acid metabolism	1/492	33/10704	0.788845	1	0.912399	6482	1
R-HSA-418990	Adherens junctions interactions	1/492	33/10704	0.788845	1	0.912399	71	1
R-HSA-5694530	Cargo concentration in the ER	1/492	33/10704	0.788845	1	0.912399	10802	1
R-HSA-68962	Activation of the pre-replicative complex	1/492	33/10704	0.788845	1	0.912399	5001	1
R-HSA-9022692	Regulation of MECP2 expression and activity	1/492	33/10704	0.788845	1	0.912399	6907	1
R-HSA-983231	Factors involved in megakaryocyte development and platelet production	6/492	168/10704	0.790584	1	0.912399	30846/25/3659/23414/23764/4097	6
R-HSA-167238	Pausing and recovery of Tat-mediated HIV elongation	1/492	34/10704	0.798581	1	0.912399	8178	1
R-HSA-167243	Tat-mediated HIV elongation arrest and recovery	1/492	34/10704	0.798581	1	0.912399	8178	1
R-HSA-187687	Signalling to ERKs	1/492	34/10704	0.798581	1	0.912399	6300	1
R-HSA-192105	Synthesis of bile acids and bile salts	1/492	34/10704	0.798581	1	0.912399	6256	1
R-HSA-5576892	Phase 0 - rapid depolarisation	1/492	34/10704	0.798581	1	0.912399	59283	1
R-HSA-70263	Gluconeogenesis	1/492	34/10704	0.798581	1	0.912399	2027	1
R-HSA-174084	Autodegradation of Cdh1 by Cdh1:APC/C	2/492	64/10704	0.799903	1	0.912399	51343/5696	2
R-HSA-111885	Opioid Signalling	3/492	92/10704	0.801556	1	0.912399	5143/5519/3708	3
R-HSA-69275	G2/M Transition	7/492	196/10704	0.802945	1	0.912399	54820/994/1026/5519/9662/80254/5696	7
R-HSA-397014	Muscle contraction	7/492	197/10704	0.807095	1	0.912399	490/4637/9424/59283/7220/3708/7273	7
R-HSA-5368287	Mitochondrial translation	3/492	93/10704	0.807451	1	0.912399	10573/51264/92399	3
R-HSA-114604	GPVI-mediated activation cascade	1/492	35/10704	0.807868	1	0.912399	5291	1
R-HSA-432720	Lysosome Vesicle Biogenesis	1/492	35/10704	0.807868	1	0.912399	130340	1
R-HSA-69239	Synthesis of DNA	4/492	120/10704	0.808272	1	0.912399	898/51343/5001/5696	4
R-HSA-8939211	ESR-mediated signaling	8/492	223/10704	0.810641	1	0.912399	208/1839/23030/5451/2353/51523/7764/3725	8
R-HSA-453274	Mitotic G2-G2/M phases	7/492	198/10704	0.811178	1	0.912399	54820/994/1026/5519/9662/80254/5696	7
R-HSA-380320	Recruitment of NuMA to mitotic centrosomes	3/492	94/10704	0.813198	1	0.912399	54820/9662/80254	3
R-HSA-5617472	Activation of anterior HOX genes in hindbrain development during early embryogenesis	4/492	121/10704	0.813376	1	0.912399	2146/7403/3725/6256	4
R-HSA-5619507	Activation of HOX genes during differentiation	4/492	121/10704	0.813376	1	0.912399	2146/7403/3725/6256	4
R-HSA-1266695	Interleukin-7 signaling	1/492	36/10704	0.816728	1	0.912399	3575	1
R-HSA-156590	Glutathione conjugation	1/492	36/10704	0.816728	1	0.912399	2730	1
R-HSA-390522	Striated Muscle Contraction	1/492	36/10704	0.816728	1	0.912399	7273	1
R-HSA-5579029	Metabolic disorders of biological oxidation enzymes	1/492	36/10704	0.816728	1	0.912399	2730	1
R-HSA-5673000	RAF activation	1/492	36/10704	0.816728	1	0.912399	5519	1
R-HSA-6802948	Signaling by high-kinase activity BRAF mutants	1/492	36/10704	0.816728	1	0.912399	71	1
R-HSA-390466	Chaperonin-mediated protein folding	3/492	95/10704	0.818799	1	0.912399	83752/898/10238	3
R-HSA-5617833	Cilium Assembly	7/492	201/10704	0.823027	1	0.912399	54820/90410/79969/9657/9662/80254/92482	7
R-HSA-176187	Activation of ATR in response to replication stress	1/492	37/10704	0.825181	1	0.912399	5001	1
R-HSA-77289	Mitochondrial Fatty Acid Beta-Oxidation	1/492	37/10704	0.825181	1	0.912399	51102	1
R-HSA-204005	COPII-mediated vesicle transport	2/492	68/10704	0.826551	1	0.912399	10802/58485	2
R-HSA-68867	Assembly of the pre-replicative complex	2/492	68/10704	0.826551	1	0.912399	5001/5696	2
R-HSA-9670095	Inhibition of DNA recombination at telomere	2/492	68/10704	0.826551	1	0.912399	25913/1616	2
R-HSA-6811442	Intra-Golgi and retrograde Golgi-to-ER traffic	7/492	202/10704	0.826846	1	0.912399	9265/55738/8677/57589/55275/56894/5049	7
R-HSA-8957322	Metabolism of steroids	5/492	151/10704	0.829879	1	0.912399	6907/7421/10802/6256/4520	5
R-HSA-9612973	Autophagy	5/492	151/10704	0.829879	1	0.912399	128866/8649/89853/7405/79065	5
R-HSA-8948751	Regulation of PTEN stability and activity	2/492	69/10704	0.832695	1	0.912399	208/5696	2
R-HSA-2129379	Molecules associated with elastic fibres	1/492	38/10704	0.833244	1	0.912399	8200	1
R-HSA-5655302	Signaling by FGFR1 in disease	1/492	38/10704	0.833244	1	0.912399	9846	1
R-HSA-5696394	DNA Damage Recognition in GG-NER	1/492	38/10704	0.833244	1	0.912399	8451	1
R-HSA-8864260	Transcriptional regulation by the AP-2 (TFAP2) family of transcription factors	1/492	38/10704	0.833244	1	0.912399	1026	1
R-HSA-8950505	Gene and protein expression by JAK-STAT signaling after Interleukin-12 stimulation	1/492	38/10704	0.833244	1	0.912399	6648	1
R-HSA-68877	Mitotic Prometaphase	7/492	204/10704	0.834289	1	0.912399	54820/2491/5519/147841/79003/9662/80254	7
R-HSA-76009	Platelet Aggregation (Plug Formation)	1/492	39/10704	0.840936	1	0.912399	5770	1
R-HSA-8955332	Carboxyterminal post-translational modifications of tubulin	1/492	39/10704	0.840936	1	0.912399	26140	1
R-HSA-194315	Signaling by Rho GTPases	17/492	455/10704	0.844231	1	0.912399	4649/54820/4637/25/2491/85360/9828/5519/26230/2909/147841/79003/367/147179/10458/71/22899	17
R-HSA-68949	Orc1 removal from chromatin	2/492	71/10704	0.844397	1	0.912399	5001/5696	2
R-HSA-69306	DNA Replication	4/492	128/10704	0.846057	1	0.912399	898/51343/5001/5696	4
R-HSA-201681	TCF dependent signaling in response to WNT	8/492	233/10704	0.846139	1	0.912399	440193/864/4040/208/22943/5519/84133/5696	8
R-HSA-1461957	Beta defensins	1/492	40/10704	0.848274	1	0.912399	7097	1
R-HSA-445355	Smooth Muscle Contraction	1/492	40/10704	0.848274	1	0.912399	4637	1
R-HSA-6783310	Fanconi Anemia Pathway	1/492	40/10704	0.848274	1	0.912399	2176	1
R-HSA-9664323	FCGR3A-mediated IL10 synthesis	1/492	40/10704	0.848274	1	0.912399	3708	1
R-HSA-391251	Protein folding	3/492	101/10704	0.849484	1	0.912399	83752/898/10238	3
R-HSA-199992	trans-Golgi Network Vesicle Budding	2/492	72/10704	0.849966	1	0.912399	9685/130340	2
R-HSA-162909	Host Interactions of HIV factors	4/492	130/10704	0.854461	1	0.912399	8480/9972/130340/5696	4
R-HSA-5696400	Dual Incision in GG-NER	1/492	41/10704	0.855274	1	0.912399	8451	1
R-HSA-2555396	Mitotic Metaphase and Anaphase	8/492	237/10704	0.858774	1	0.912399	54820/128866/2491/26271/5519/147841/79003/5696	8
R-HSA-174178	APC/C:Cdh1 mediated degradation of Cdc20 and other APC/C:Cdh1 targeted proteins in late mitosis/early G1	2/492	74/10704	0.860562	1	0.912399	51343/5696	2
R-HSA-3769402	Deactivation of the beta-catenin transactivating complex	1/492	42/10704	0.861952	1	0.912399	208	1
R-HSA-381676	Glucagon-like Peptide-1 (GLP1) regulates insulin secretion	1/492	42/10704	0.861952	1	0.912399	3708	1
R-HSA-198933	Immunoregulatory interactions between a Lymphoid and a non-Lymphoid cell	4/492	132/10704	0.862473	1	0.912399	29121/3383/7412/374383	4
R-HSA-1433557	Signaling by SCF-KIT	1/492	43/10704	0.868322	1	0.912399	9846	1
R-HSA-194068	Bile acid and bile salt metabolism	1/492	43/10704	0.868322	1	0.912399	6256	1
R-HSA-5696395	Formation of Incision Complex in GG-NER	1/492	43/10704	0.868322	1	0.912399	8451	1
R-HSA-9656223	Signaling by RAF1 mutants	1/492	43/10704	0.868322	1	0.912399	71	1
R-HSA-211945	Phase I - Functionalization of compounds	3/492	106/10704	0.871503	1	0.912399	54498/219/6256	3
R-HSA-8856825	Cargo recognition for clathrin-mediated endocytosis	3/492	106/10704	0.871503	1	0.912399	1839/26119/3575	3
R-HSA-416476	G alpha (q) signalling events	7/492	216/10704	0.873755	1	0.912399	1839/5999/1609/3708/9630/5581/2869	7
R-HSA-975634	Retinoid metabolism and transport	1/492	44/10704	0.874399	1	0.912399	6385	1
R-HSA-8852276	The role of GTSE1 in G2/M progression after G2 checkpoint	2/492	77/10704	0.875178	1	0.912399	1026/5696	2
R-HSA-1632852	Macroautophagy	4/492	136/10704	0.87737	1	0.912399	128866/8649/7405/79065	4
R-HSA-211000	Gene Silencing by RNA	4/492	136/10704	0.87737	1	0.912399	8480/9972/54487/4603	4
R-HSA-2467813	Separation of Sister Chromatids	6/492	191/10704	0.878338	1	0.912399	54820/2491/5519/147841/79003/5696	6
R-HSA-425393	Transport of inorganic cations/anions and amino acids/oligopeptides	3/492	108/10704	0.879483	1	0.912399	54407/1836/23315	3
R-HSA-1566948	Elastic fibre formation	1/492	45/10704	0.880196	1	0.912399	8200	1
R-HSA-2172127	DAP12 interactions	1/492	45/10704	0.880196	1	0.912399	5291	1
R-HSA-2672351	Stimuli-sensing channels	3/492	109/10704	0.883306	1	0.912399	7220/219931/197259	3
R-HSA-6781827	Transcription-Coupled Nucleotide Excision Repair (TC-NER)	2/492	79/10704	0.884124	1	0.912399	8178/8451	2
R-HSA-8852135	Protein ubiquitination	2/492	79/10704	0.884124	1	0.912399	51322/8915	2
R-HSA-1660662	Glycosphingolipid metabolism	1/492	46/10704	0.885726	1	0.912399	80772	1
R-HSA-167169	HIV Transcription Elongation	1/492	46/10704	0.885726	1	0.912399	8178	1
R-HSA-167200	Formation of HIV-1 elongation complex containing HIV-1 Tat	1/492	46/10704	0.885726	1	0.912399	8178	1
R-HSA-167246	Tat-mediated elongation of the HIV-1 transcript	1/492	46/10704	0.885726	1	0.912399	8178	1
R-HSA-437239	Recycling pathway of L1	1/492	47/10704	0.891001	1	0.912399	71	1
R-HSA-6802946	Signaling by moderate kinase activity BRAF mutants	1/492	47/10704	0.891001	1	0.912399	71	1
R-HSA-6802949	Signaling by RAS mutants	1/492	47/10704	0.891001	1	0.912399	71	1
R-HSA-6802955	Paradoxical activation of RAF signaling by kinase inactive BRAF	1/492	47/10704	0.891001	1	0.912399	71	1
R-HSA-9020591	Interleukin-12 signaling	1/492	47/10704	0.891001	1	0.912399	6648	1
R-HSA-9649948	Signaling downstream of RAS mutants	1/492	47/10704	0.891001	1	0.912399	71	1
R-HSA-977606	Regulation of Complement cascade	1/492	47/10704	0.891001	1	0.912399	716	1
R-HSA-195258	RHO GTPase Effectors	11/492	327/10704	0.892296	1	0.912399	54820/4637/25/2491/5519/147841/79003/367/147179/10458/71	11
R-HSA-73886	Chromosome Maintenance	4/492	141/10704	0.894013	1	0.912399	2491/25913/80169/1616	4
R-HSA-73893	DNA Damage Bypass	1/492	48/10704	0.896033	1	0.912399	8451	1
R-HSA-9013694	Signaling by NOTCH4	2/492	82/10704	0.896437	1	0.912399	3280/5696	2
R-HSA-68875	Mitotic Prophase	4/492	142/10704	0.897094	1	0.912399	8480/84930/9972/5519	4
R-HSA-157579	Telomere Maintenance	3/492	113/10704	0.897539	1	0.912399	25913/80169/1616	3
R-HSA-195253	Degradation of beta-catenin by the destruction complex	2/492	83/10704	0.900263	1	0.912399	5519/5696	2
R-HSA-1236978	Cross-presentation of soluble exogenous antigens (endosomes)	1/492	49/10704	0.900834	1	0.912399	5696	1
R-HSA-195721	Signaling by WNT	11/492	332/10704	0.902665	1	0.912399	440193/864/4040/208/22943/7482/5519/3708/84133/4919/5696	11
R-HSA-1461973	Defensins	1/492	50/10704	0.905413	1	0.912399	7097	1
R-HSA-1483249	Inositol phosphate metabolism	1/492	50/10704	0.905413	1	0.912399	11163	1
R-HSA-177929	Signaling by EGFR	1/492	50/10704	0.905413	1	0.912399	1839	1
R-HSA-211733	Regulation of activated PAK-2p34 by proteasome mediated degradation	1/492	50/10704	0.905413	1	0.912399	5696	1
R-HSA-73894	DNA Repair	11/492	334/10704	0.906575	1	0.912399	79728/25/4683/8178/23030/25913/9656/675/8451/2176/3981	11
R-HSA-216083	Integrin cell surface interactions	2/492	85/10704	0.907524	1	0.912399	3383/7412	2
R-HSA-69002	DNA Replication Pre-Initiation	2/492	85/10704	0.907524	1	0.912399	5001/5696	2
R-HSA-373076	Class A/1 (Rhodopsin-like receptors)	11/492	335/10704	0.90848	1	0.912399	6376/2920/6347/6364/2921/6374/2919/3627/6373/3576/6352	11
R-HSA-5620920	Cargo trafficking to the periciliary membrane	1/492	51/10704	0.909781	1	0.912399	92482	1
R-HSA-5619115	Disorders of transmembrane transporters	5/492	175/10704	0.909903	1	0.912399	8480/9972/1836/55343/5696	5
R-HSA-912446	Meiotic recombination	2/492	86/10704	0.910966	1	0.912399	4683/675	2
R-HSA-1500620	Meiosis	3/492	118/10704	0.913126	1	0.912399	4683/25913/675	3
R-HSA-2408522	Selenoamino acid metabolism	3/492	118/10704	0.913126	1	0.912399	51121/51091/7296	3
R-HSA-171306	Packaging Of Telomere Ends	1/492	52/10704	0.913947	1	0.912399	25913	1
R-HSA-180534	Vpu mediated degradation of CD4	1/492	52/10704	0.913947	1	0.912399	5696	1
R-HSA-349425	Autodegradation of the E3 ubiquitin ligase COP1	1/492	52/10704	0.913947	1	0.912399	5696	1
R-HSA-69601	Ubiquitin Mediated Degradation of Phosphorylated Cdc25A	1/492	52/10704	0.913947	1	0.912399	5696	1
R-HSA-69610	p53-Independent DNA Damage Response	1/492	52/10704	0.913947	1	0.912399	5696	1
R-HSA-69613	p53-Independent G1/S DNA damage checkpoint	1/492	52/10704	0.913947	1	0.912399	5696	1
R-HSA-75815	Ubiquitin-dependent degradation of Cyclin D	1/492	52/10704	0.913947	1	0.912399	5696	1
R-HSA-5368286	Mitochondrial translation initiation	2/492	87/10704	0.914288	1	0.912399	10573/51264	2
R-HSA-5389840	Mitochondrial translation elongation	2/492	87/10704	0.914288	1	0.912399	10573/51264	2
R-HSA-180585	Vif-mediated degradation of APOBEC3G	1/492	54/10704	0.921713	1	0.912399	5696	1
R-HSA-5620924	Intraflagellar transport	1/492	54/10704	0.921713	1	0.912399	90410	1
R-HSA-6781823	Formation of TC-NER Pre-Incision Complex	1/492	54/10704	0.921713	1	0.912399	8451	1
R-HSA-8854050	FBXL7 down-regulates AURKA during mitotic entry and in early mitosis	1/492	54/10704	0.921713	1	0.912399	5696	1
R-HSA-9604323	Negative regulation of NOTCH4 signaling	1/492	54/10704	0.921713	1	0.912399	5696	1
R-HSA-68882	Mitotic Anaphase	7/492	236/10704	0.922133	1	0.912399	54820/128866/2491/5519/147841/79003/5696	7
R-HSA-2980736	Peptide hormone metabolism	2/492	90/10704	0.92357	1	0.912399	60559/9314	2
R-HSA-112043	PLC beta mediated events	1/492	55/10704	0.92533	1	0.912399	3708	1
R-HSA-4641257	Degradation of AXIN	1/492	55/10704	0.92533	1	0.912399	5696	1
R-HSA-5250924	B-WICH complex positively regulates rRNA expression	2/492	91/10704	0.926448	1	0.912399	25885/79101	2
R-HSA-73772	RNA Polymerase I Promoter Escape	2/492	91/10704	0.926448	1	0.912399	25885/79101	2
R-HSA-2132295	MHC class II antigen presentation	3/492	123/10704	0.92653	1	0.912399	10802/130340/1520	3
R-HSA-8878171	Transcriptional regulation by RUNX1	7/492	239/10704	0.927794	1	0.912399	25/8535/6886/23429/23466/9021/5696	7
R-HSA-110330	Recognition and association of DNA glycosylase with site containing an affected purine	1/492	56/10704	0.92878	1	0.912399	25913	1
R-HSA-110331	Cleavage of the damaged purine	1/492	56/10704	0.92878	1	0.912399	25913	1
R-HSA-112040	G-protein mediated events	1/492	56/10704	0.92878	1	0.912399	3708	1
R-HSA-450408	AUF1 (hnRNP D0) binds and destabilizes mRNA	1/492	56/10704	0.92878	1	0.912399	5696	1
R-HSA-5362768	Hh mutants that don't undergo autocatalytic processing are degraded by ERAD	1/492	56/10704	0.92878	1	0.912399	5696	1
R-HSA-73927	Depurination	1/492	56/10704	0.92878	1	0.912399	25913	1
R-HSA-4086400	PCP/CE pathway	2/492	92/10704	0.929223	1	0.912399	4919/5696	2
R-HSA-163125	Post-translational modification: synthesis of GPI-anchored proteins	2/492	93/10704	0.931899	1	0.912399	5329/93183	2
R-HSA-2408557	Selenocysteine synthesis	2/492	93/10704	0.931899	1	0.912399	51121/51091	2
R-HSA-4641258	Degradation of DVL	1/492	57/10704	0.932071	1	0.912399	5696	1
R-HSA-936837	Ion transport by P-type ATPases	1/492	57/10704	0.932071	1	0.912399	490	1
R-HSA-1236394	Signaling by ERBB4	1/492	58/10704	0.93521	1	0.912399	1839	1
R-HSA-166658	Complement cascade	1/492	58/10704	0.93521	1	0.912399	716	1
R-HSA-373080	Class B/2 (Secretin family receptors)	2/492	95/10704	0.936968	1	0.912399	79924/7482	2
R-HSA-5625740	RHO GTPases activate PKNs	2/492	95/10704	0.936968	1	0.912399	4637/367	2
R-HSA-69473	G2/M DNA damage checkpoint	2/492	95/10704	0.936968	1	0.912399	4683/9656	2
R-HSA-5668914	Diseases of metabolism	7/492	245/10704	0.938048	1	0.912399	2730/6385/1836/1464/11041/22845/10195	7
R-HSA-5387390	Hh mutants abrogate ligand secretion	1/492	59/10704	0.938204	1	0.912399	5696	1
R-HSA-5610780	Degradation of GLI1 by the proteasome	1/492	60/10704	0.94106	1	0.912399	5696	1
R-HSA-5610783	Degradation of GLI2 by the proteasome	1/492	60/10704	0.94106	1	0.912399	5696	1
R-HSA-5610785	GLI3 is processed to GLI3R by the proteasome	1/492	60/10704	0.94106	1	0.912399	5696	1
R-HSA-196854	Metabolism of vitamins and cofactors	5/492	190/10704	0.941182	1	0.912399	29914/6385/2643/56965/154807	5
R-HSA-8939236	RUNX1 regulates transcription of genes involved in differentiation of HSCs	3/492	130/10704	0.942125	1	0.912399	25/6886/5696	3
R-HSA-110328	Recognition and association of DNA glycosylase with site containing an affected pyrimidine	1/492	61/10704	0.943785	1	0.912399	25913	1
R-HSA-110329	Cleavage of the damaged pyrimidine	1/492	61/10704	0.943785	1	0.912399	25913	1
R-HSA-5678895	Defective CFTR causes cystic fibrosis	1/492	61/10704	0.943785	1	0.912399	5696	1
R-HSA-6790901	rRNA modification in the nucleus and cytosol	1/492	61/10704	0.943785	1	0.912399	10436	1
R-HSA-73928	Depyrimidination	1/492	61/10704	0.943785	1	0.912399	25913	1
R-HSA-5693607	Processing of DNA double-strand break ends	2/492	98/10704	0.943905	1	0.912399	4683/9656	2
R-HSA-4086398	Ca2+ pathway	1/492	62/10704	0.946383	1	0.912399	3708	1
R-HSA-8856688	Golgi-to-ER retrograde transport	3/492	133/10704	0.947821	1	0.912399	55738/56894/5049	3
R-HSA-1226099	Signaling by FGFR in disease	1/492	63/10704	0.948862	1	0.912399	9846	1
R-HSA-73929	Base-Excision Repair, AP Site Formation	1/492	63/10704	0.948862	1	0.912399	25913	1
R-HSA-4608870	Asymmetric localization of PCP proteins	1/492	64/10704	0.951226	1	0.912399	5696	1
R-HSA-168273	Influenza Viral RNA Transcription and Replication	3/492	135/10704	0.951323	1	0.912399	51121/8480/9972	3
R-HSA-68886	M Phase	13/492	418/10704	0.951949	1	0.912399	54820/8480/128866/2491/26271/84930/9972/5519/147841/79003/9662/80254/5696	13
R-HSA-5358346	Hedgehog ligand biogenesis	1/492	65/10704	0.953482	1	0.912399	5696	1
R-HSA-6782210	Gap-filling DNA repair synthesis and ligation in TC-NER	1/492	65/10704	0.953482	1	0.912399	8451	1
R-HSA-8873719	RAB geranylgeranylation	1/492	65/10704	0.953482	1	0.912399	10981	1
R-HSA-69481	G2/M Checkpoints	4/492	168/10704	0.953824	1	0.912399	4683/9656/5001/5696	4
R-HSA-382556	ABC-family proteins mediated transport	2/492	103/10704	0.953881	1	0.912399	5825/5696	2
R-HSA-211897	Cytochrome P450 - arranged by substrate type	1/492	66/10704	0.955633	1	0.912399	6256	1
R-HSA-6782135	Dual incision in TC-NER	1/492	66/10704	0.955633	1	0.912399	8451	1
R-HSA-1650814	Collagen biosynthesis and modifying enzymes	1/492	67/10704	0.957685	1	0.912399	871	1
R-HSA-5625886	Activated PKN1 stimulates transcription of AR (androgen receptor) regulated genes KLK2 and KLK3	1/492	67/10704	0.957685	1	0.912399	367	1
R-HSA-5250913	Positive epigenetic regulation of rRNA expression	2/492	106/10704	0.959028	1	0.912399	25885/79101	2
R-HSA-5578749	Transcriptional regulation by small RNAs	2/492	106/10704	0.959028	1	0.912399	8480/9972	2
R-HSA-174154	APC/C:Cdc20 mediated degradation of Securin	1/492	68/10704	0.959642	1	0.912399	5696	1
R-HSA-3906995	Diseases associated with O-glycosylation of proteins	1/492	68/10704	0.959642	1	0.912399	11041	1
R-HSA-427359	SIRT1 negatively regulates rRNA expression	1/492	68/10704	0.959642	1	0.912399	79101	1
R-HSA-5658442	Regulation of RAS by GAPs	1/492	68/10704	0.959642	1	0.912399	5696	1
R-HSA-156580	Phase II - Conjugation of compounds	2/492	107/10704	0.960618	1	0.912399	2730/1836	2
R-HSA-427413	NoRC negatively regulates rRNA expression	2/492	107/10704	0.960618	1	0.912399	25885/79101	2
R-HSA-3214847	HATs acetylate histones	3/492	142/10704	0.96193	1	0.912399	54556/10902/80314	3
R-HSA-1474165	Reproduction	3/492	143/10704	0.963255	1	0.912399	4683/25913/675	3
R-HSA-157118	Signaling by NOTCH	6/492	236/10704	0.963667	1	0.912399	9734/6907/3280/3725/5696/54492	6
R-HSA-5250941	Negative epigenetic regulation of rRNA expression	2/492	110/10704	0.965041	1	0.912399	25885/79101	2
R-HSA-73854	RNA Polymerase I Promoter Clearance	2/492	110/10704	0.965041	1	0.912399	25885/79101	2
R-HSA-8978868	Fatty acid metabolism	4/492	177/10704	0.965487	1	0.912399	5264/1374/51102/6256	4
R-HSA-5696398	Nucleotide Excision Repair	2/492	111/10704	0.966407	1	0.912399	8178/8451	2
R-HSA-3858494	Beta-catenin independent WNT signaling	3/492	146/10704	0.966975	1	0.912399	3708/4919/5696	3
R-HSA-1799339	SRP-dependent cotranslational protein targeting to membrane	2/492	112/10704	0.967721	1	0.912399	51121/60559	2
R-HSA-73864	RNA Polymerase I Transcription	2/492	112/10704	0.967721	1	0.912399	25885/79101	2
R-HSA-174184	Cdc20:Phospho-APC/C mediated degradation of Cyclin A	1/492	73/10704	0.968153	1	0.912399	5696	1
R-HSA-8939902	Regulation of RUNX2 expression and activity	1/492	73/10704	0.968153	1	0.912399	5696	1
R-HSA-179419	APC:Cdc20 mediated degradation of cell cycle proteins prior to satisfation of the cell cycle checkpoint	1/492	74/10704	0.969627	1	0.912399	5696	1
R-HSA-606279	Deposition of new CENPA-containing nucleosomes at the centromere	1/492	74/10704	0.969627	1	0.912399	2491	1
R-HSA-774815	Nucleosome assembly	1/492	74/10704	0.969627	1	0.912399	2491	1
R-HSA-2995410	Nuclear Envelope (NE) Reassembly	1/492	75/10704	0.971033	1	0.912399	128866	1
R-HSA-927802	Nonsense-Mediated Decay (NMD)	2/492	115/10704	0.971373	1	0.912399	51121/55802	2
R-HSA-975957	Nonsense Mediated Decay (NMD) enhanced by the Exon Junction Complex (EJC)	2/492	115/10704	0.971373	1	0.912399	51121/55802	2
R-HSA-176409	APC/C:Cdc20 mediated degradation of mitotic proteins	1/492	76/10704	0.972374	1	0.912399	5696	1
R-HSA-176814	Activation of APC/C and APC/C:Cdc20 mediated degradation of mitotic proteins	1/492	77/10704	0.973653	1	0.912399	5696	1
R-HSA-5619084	ABC transporter disorders	1/492	77/10704	0.973653	1	0.912399	5696	1
R-HSA-983712	Ion channel transport	4/492	186/10704	0.974364	1	0.912399	490/7220/219931/197259	4
R-HSA-199977	ER to Golgi Anterograde Transport	3/492	154/10704	0.975234	1	0.912399	55738/10802/58485	3
R-HSA-1221632	Meiotic synapsis	1/492	79/10704	0.976036	1	0.912399	25913	1
R-HSA-211859	Biological oxidations	5/492	220/10704	0.976296	1	0.912399	2730/54498/219/1836/6256	5
R-HSA-425407	SLC-mediated transmembrane transport	6/492	251/10704	0.97656	1	0.912399	2030/54407/9123/1836/55343/23315	6
R-HSA-168255	Influenza Infection	3/492	156/10704	0.976969	1	0.912399	51121/8480/9972	3
R-HSA-71291	Metabolism of amino acids and derivatives	10/492	374/10704	0.980278	1	0.912399	51121/54498/51091/4953/3712/51582/152926/57494/7296/5696	10
R-HSA-5696399	Global Genome Nucleotide Excision Repair (GG-NER)	1/492	84/10704	0.981095	1	0.912399	8451	1
R-HSA-425366	Transport of bile salts and organic acids, metal ions and amine compounds	1/492	85/10704	0.981971	1	0.912399	9123	1
R-HSA-5632684	Hedgehog 'on' state	1/492	85/10704	0.981971	1	0.912399	5696	1
R-HSA-500792	GPCR ligand binding	13/492	467/10704	0.984192	1	0.912399	6376/2920/6347/6364/79924/7482/2921/6374/2919/3627/6373/3576/6352	13
R-HSA-156902	Peptide chain elongation	1/492	89/10704	0.985087	1	0.912399	51121	1
R-HSA-192823	Viral mRNA Translation	1/492	89/10704	0.985087	1	0.912399	51121	1
R-HSA-428157	Sphingolipid metabolism	1/492	89/10704	0.985087	1	0.912399	80772	1
R-HSA-9662851	Anti-inflammatory response favouring Leishmania parasite infection	3/492	169/10704	0.985726	1	0.912399	79924/3569/3708	3
R-HSA-9664433	Leishmania parasite growth and survival	3/492	169/10704	0.985726	1	0.912399	79924/3569/3708	3
R-HSA-201722	Formation of the beta-catenin:TCF transactivating complex	1/492	91/10704	0.986438	1	0.912399	864	1
R-HSA-9660821	ADORA2B mediated anti-inflammatory cytokines production	2/492	134/10704	0.986771	1	0.912399	79924/3569	2
R-HSA-73884	Base Excision Repair	1/492	92/10704	0.987066	1	0.912399	25913	1
R-HSA-156842	Eukaryotic Translation Elongation	1/492	93/10704	0.987666	1	0.912399	51121	1
R-HSA-1912408	Pre-NOTCH Transcription and Translation	1/492	93/10704	0.987666	1	0.912399	3725	1
R-HSA-72764	Eukaryotic Translation Termination	1/492	93/10704	0.987666	1	0.912399	51121	1
R-HSA-446203	Asparagine N-linked glycosylation	7/492	304/10704	0.988033	1	0.912399	6482/55738/10802/58485/22845/55343/10195	7
R-HSA-3214815	HDACs deacetylate histones	1/492	94/10704	0.988238	1	0.912399	6907	1
R-HSA-6803157	Antimicrobial peptides	1/492	95/10704	0.988783	1	0.912399	7097	1
R-HSA-975956	Nonsense Mediated Decay (NMD) independent of the Exon Junction Complex (EJC)	1/492	95/10704	0.988783	1	0.912399	51121	1
R-HSA-6811434	COPI-dependent Golgi-to-ER retrograde traffic	1/492	99/10704	0.990724	1	0.912399	55738	1
R-HSA-6807878	COPI-mediated anterograde transport	1/492	101/10704	0.991565	1	0.912399	55738	1
R-HSA-72689	Formation of a pool of free 40S subunits	1/492	101/10704	0.991565	1	0.912399	51121	1
R-HSA-6791226	Major pathway of rRNA processing in the nucleolus and cytosol	3/492	184/10704	0.99188	1	0.912399	51121/5393/10436	3
R-HSA-5689603	UCH proteinases	1/492	102/10704	0.991956	1	0.912399	5696	1
R-HSA-948021	Transport to the Golgi and subsequent modification	3/492	185/10704	0.992183	1	0.912399	55738/10802/58485	3
R-HSA-1296071	Potassium Channels	1/492	103/10704	0.992329	1	0.912399	9424	1
R-HSA-1912422	Pre-NOTCH Expression and Processing	1/492	109/10704	0.994233	1	0.912399	3725	1
R-HSA-8868773	rRNA processing in the nucleus and cytosol	3/492	194/10704	0.994462	1	0.912399	51121/5393/10436	3
R-HSA-156827	L13a-mediated translational silencing of Ceruloplasmin expression	1/492	111/10704	0.994756	1	0.912399	51121	1
R-HSA-72706	GTP hydrolysis and joining of the 60S ribosomal subunit	1/492	112/10704	0.995	1	0.912399	51121	1
R-HSA-5610787	Hedgehog 'off' state	1/492	113/10704	0.995232	1	0.912399	5696	1
R-HSA-72312	rRNA processing	3/492	204/10704	0.99624	1	0.912399	51121/5393/10436	3
R-HSA-373760	L1CAM interactions	1/492	119/10704	0.996416	1	0.912399	71	1
R-HSA-72613	Eukaryotic Translation Initiation	1/492	119/10704	0.996416	1	0.912399	51121	1
R-HSA-72737	Cap-dependent Translation Initiation	1/492	119/10704	0.996416	1	0.912399	51121	1
R-HSA-196849	Metabolism of water-soluble vitamins and cofactors	1/492	123/10704	0.997037	1	0.912399	56965	1
R-HSA-9010553	Regulation of expression of SLITs and ROBOs	2/492	171/10704	0.997188	1	0.912399	51121/5696	2
R-HSA-72766	Translation	5/492	291/10704	0.997803	1	0.912399	51121/10573/51264/60559/92399	5
R-HSA-376176	Signaling by ROBO receptors	3/492	218/10704	0.997829	1	0.912399	51121/25/5696	3
R-HSA-6809371	Formation of the cornified envelope	1/492	130/10704	0.997877	1	0.912399	1832	1
R-HSA-112315	Transmission across Chemical Synapses	4/492	270/10704	0.99873	1	0.912399	80331/54407/773/59283	4
R-HSA-5358351	Signaling by Hedgehog	1/492	149/10704	0.999142	1	0.912399	5696	1
R-HSA-112316	Neuronal System	7/492	410/10704	0.999612	1	0.912399	9424/80331/24145/54407/773/59283/10052	7
R-HSA-112314	Neurotransmitter receptors and postsynaptic signal transmission	1/492	205/10704	0.999941	1	0.912399	59283	1
R-HSA-6805567	Keratinization	1/492	214/10704	0.999962	1	0.912399	1832	1
R-HSA-381753	Olfactory Signaling Pathway	1/492	394/10704	1	1	0.912399	64108	1
