# Supplementary material for: Development of a bioinformatics platform for analysis of quantitative transcriptomics and proteomics data: the OMnalysis
Source: PeerJ. 2021 Nov 9;9:e12415. doi: 10.7717/peerj.12415 (PMC8588854; doi:10.7717/peerj.12415)
Supplement: Supplemental Information 17 [file peerj-09-12415-s017.xlsx]

## Sheet: String_treatment1
category	term	number_of_genes	number_of_genes_in_background	ncbiTaxonId	inputGenes	preferredNames	p_value	fdr	description
Component	GO.0005615	44	1134	9606	9606.ENSP00000006053,9606.ENSP00000220809,9606.ENSP00000225474,9606.ENSP00000225831,9606.ENSP00000226317,9606.ENSP00000228534,9606.ENSP00000242208,9606.ENSP00000243347,9606.ENSP00000245907,9606.ENSP00000252809,9606.ENSP00000259206,9606.ENSP00000260356,9606.ENSP00000261292,9606.ENSP00000263339,9606.ENSP00000263341,9606.ENSP00000264144,9606.ENSP00000264832,9606.ENSP00000265361,9606.ENSP00000265362,…	CX3CL1,PLAT,CSF3,CCL2,CXCL6,IL23A,INHBA,TNFAIP6,C3,GDF15,IL1RN,THBS1,LIPG,IL1A,IL1B,LAMC2,ICAM1,SEMA3C,SEMA3A,SEMA3D,TIMP4,VCAM1,PTX3,CXCL3,CXCL5,FGF5,ANGPT2,SELE,CCL20,CTSS,PLAU,ANGPTL2,TNFSF13B,IL24,CXCL1,IL18BP,IL6,SERPINE2,PDGFC,CXCL2,IL32,SAA2,C1R,LDLR	2.34e-14	8.17e-12	extracellular space
Component	GO.0005576	62	2505	9606	9606.ENSP00000006053,9606.ENSP00000220809,9606.ENSP00000222543,9606.ENSP00000225474,9606.ENSP00000225831,9606.ENSP00000226317,9606.ENSP00000226574,9606.ENSP00000228280,9606.ENSP00000228534,9606.ENSP00000241261,9606.ENSP00000242208,9606.ENSP00000243347,9606.ENSP00000245907,9606.ENSP00000252809,9606.ENSP00000254958,9606.ENSP00000256759,9606.ENSP00000258613,9606.ENSP00000259206,9606.ENSP00000260356,…	CX3CL1,PLAT,TFPI2,CSF3,CCL2,CXCL6,NFKB1,KITLG,IL23A,TNFSF10,INHBA,TNFAIP6,C3,GDF15,JAG1,FST,THSD1,IL1RN,THBS1,LIPG,IL1A,IL1B,KDR,LAMC2,ICAM1,SEMA3C,SEMA3A,PLA1A,SEMA3D,ABI3BP,TIMP4,VCAM1,PTX3,CXCL3,CXCL5,HHIP,FGF5,ANGPT2,SELE,PLAUR,NTN4,CCL20,CTSS,GBP1,PLAU,ANGPTL2,TNFSF13B,ADAMTS6,ESM1,IL24,CXCL1,IL18BP,IL6,SERPINE2,PDGFC,CXCL2,SAMD1,IL32,SAA2,C1R,LDLR,IL4I1	1.59e-11	2.77e-09	extracellular region
Component	GO.0009986	23	690	9606	9606.ENSP00000005257,9606.ENSP00000006053,9606.ENSP00000161559,9606.ENSP00000220809,9606.ENSP00000246006,9606.ENSP00000259030,9606.ENSP00000260010,9606.ENSP00000260356,9606.ENSP00000261292,9606.ENSP00000264832,9606.ENSP00000294728,9606.ENSP00000296575,9606.ENSP00000296585,9606.ENSP00000330696,9606.ENSP00000339328,9606.ENSP00000357909,9606.ENSP00000361850,9606.ENSP00000369055,9606.ENSP00000398632,…	RALA,CX3CL1,CEACAM1,PLAT,CD93,RTP4,TLR2,THBS1,LIPG,ICAM1,VCAM1,HHIP,ITGA2,P2RX7,PLAUR,SEMA6C,PLAU,B4GALT1,CD44,SERPINE2,PDGFC,ADAM8,LDLR	8.98e-07	0.0001	cell surface
Component	GO.0033256	4	7	9606	9606.ENSP00000216797,9606.ENSP00000221452,9606.ENSP00000226574,9606.ENSP00000358983	NFKBIA,RELB,NFKB1,NFKB2	3.11e-06	0.00027	I-kappaB/NF-kappaB complex
Component	GO.0070820	10	164	9606	9606.ENSP00000161559,9606.ENSP00000243347,9606.ENSP00000246006,9606.ENSP00000295927,9606.ENSP00000334928,9606.ENSP00000357981,9606.ENSP00000361850,9606.ENSP00000369129,9606.ENSP00000379110,9606.ENSP00000453302	CEACAM1,TNFAIP6,CD93,PTX3,PTPRB,CTSS,PLAU,DSP,CXCL1,ADAM8	1.1e-05	0.00077	tertiary granule
Component	GO.0030141	23	828	9606	9606.ENSP00000161559,9606.ENSP00000220809,9606.ENSP00000226574,9606.ENSP00000243347,9606.ENSP00000245907,9606.ENSP00000246006,9606.ENSP00000260010,9606.ENSP00000260356,9606.ENSP00000263341,9606.ENSP00000265598,9606.ENSP00000273371,9606.ENSP00000295927,9606.ENSP00000334928,9606.ENSP00000339328,9606.ENSP00000346697,9606.ENSP00000357981,9606.ENSP00000361850,9606.ENSP00000369055,9606.ENSP00000369129,…	CEACAM1,PLAT,NFKB1,TNFAIP6,C3,CD93,TLR2,THBS1,IL1B,LAMP3,PLA1A,PTX3,PTPRB,PLAUR,BMF,CTSS,PLAU,B4GALT1,DSP,CXCL1,CD44,SERPINE2,ADAM8	1.66e-05	0.00097	secretory granule
Component	GO.0012505	69	4347	9606	9606.ENSP00000161559,9606.ENSP00000220809,9606.ENSP00000226299,9606.ENSP00000226574,9606.ENSP00000228534,9606.ENSP00000243347,9606.ENSP00000243457,9606.ENSP00000245907,9606.ENSP00000246006,9606.ENSP00000252809,9606.ENSP00000256458,9606.ENSP00000260010,9606.ENSP00000260356,9606.ENSP00000261292,9606.ENSP00000263341,9606.ENSP00000263923,9606.ENSP00000265080,9606.ENSP00000265087,9606.ENSP00000265598,…	CEACAM1,PLAT,LAP3,NFKB1,IL23A,TNFAIP6,KCNJ2,C3,CD93,GDF15,IRAK2,TLR2,THBS1,LIPG,IL1B,KDR,RASGRF2,STC2,LAMP3,SQLE,PLA1A,NFKBIE,SMAD6,VCAM1,PTX3,DAB2,RHBDF2,P2RX7,SELE,DSE,PTPRB,PLAUR,GALNT15,BMF,WTAP,BLZF1,CTSS,GBP5,GBP4,GBP2,GBP1,GBP3,SGIP1,PPAP2B,IFIT2,PLAU,ZC3H12A,ID1,RPGR,B4GALT1,DSP,TRIM22,MYO1B,BCL2L11,CXCL1,NAV3,IL6,DYSF,JAK3,CD44,KBTBD8,DOCK4,SERPINE2,GCH1,PDGFC,ADAM8,LDLR,PLA2G4C,SMOX	4.45e-05	0.0022	endomembrane system
Component	GO.0042581	9	159	9606	9606.ENSP00000161559,9606.ENSP00000226574,9606.ENSP00000246006,9606.ENSP00000295927,9606.ENSP00000334928,9606.ENSP00000339328,9606.ENSP00000361850,9606.ENSP00000379110,9606.ENSP00000453302	CEACAM1,NFKB1,CD93,PTX3,PTPRB,PLAUR,PLAU,CXCL1,ADAM8	5.29e-05	0.0023	specific granule
Component	GO.0030667	12	298	9606	9606.ENSP00000161559,9606.ENSP00000246006,9606.ENSP00000260010,9606.ENSP00000265598,9606.ENSP00000273371,9606.ENSP00000334928,9606.ENSP00000339328,9606.ENSP00000361850,9606.ENSP00000369055,9606.ENSP00000369129,9606.ENSP00000398632,9606.ENSP00000453302	CEACAM1,CD93,TLR2,LAMP3,PLA1A,PTPRB,PLAUR,PLAU,B4GALT1,DSP,CD44,ADAM8	7.56e-05	0.0029	secretory granule membrane
Component	GO.0098858	9	192	9606	9606.ENSP00000161559,9606.ENSP00000228280,9606.ENSP00000285379,9606.ENSP00000286298,9606.ENSP00000294728,9606.ENSP00000369055,9606.ENSP00000376132,9606.ENSP00000398632,9606.ENSP00000404179	CEACAM1,KITLG,CA2,SLC26A2,VCAM1,B4GALT1,MYO1B,CD44,DOCK4	0.00021	0.0066	actin-based cell projection
Component	GO.0005737	139	11238	9606	9606.ENSP00000005257,9606.ENSP00000161559,9606.ENSP00000216797,9606.ENSP00000220751,9606.ENSP00000220809,9606.ENSP00000221452,9606.ENSP00000222553,9606.ENSP00000226299,9606.ENSP00000226574,9606.ENSP00000228280,9606.ENSP00000228534,9606.ENSP00000234111,9606.ENSP00000242208,9606.ENSP00000243347,9606.ENSP00000243457,9606.ENSP00000245185,9606.ENSP00000245414,9606.ENSP00000245907,9606.ENSP00000246006,…	RALA,CEACAM1,NFKBIA,RIPK2,PLAT,RELB,NAMPT,LAP3,NFKB1,KITLG,IL23A,ODC1,INHBA,TNFAIP6,KCNJ2,MT2A,IRF1,C3,CD93,DHX58,GDF15,TRIM47,IRAK2,BHLHE40,OASL,DRAM1,THSD1,RTP4,IL1RN,GMPR,IER3,TLR2,THBS1,HECW2,LIPG,PLEKHA4,IL1A,IL1B,BIRC3,IFIH1,KDR,LAMC2,HERC6,RASGRF2,STC2,LAMP3,SQLE,PHLDA1,PLA1A,NFKBIE,CA2,TIMP4,SMAD6,VCAM1,CLDN1,PTX3,HHIP,ITGA2,DAB2,TNIP1,HMGCS1,RHBDF2,CNDP2,NFKBIZ,LIMS2,P2RX7,SELE,DSE,PTPRB…	0.00022	0.0066	cytoplasm
Component	GO.0071944	76	5254	9606	9606.ENSP00000004531,9606.ENSP00000005257,9606.ENSP00000006053,9606.ENSP00000161559,9606.ENSP00000216797,9606.ENSP00000228280,9606.ENSP00000241261,9606.ENSP00000243457,9606.ENSP00000245907,9606.ENSP00000246006,9606.ENSP00000254958,9606.ENSP00000256458,9606.ENSP00000259206,9606.ENSP00000260010,9606.ENSP00000260356,9606.ENSP00000262461,9606.ENSP00000263265,9606.ENSP00000263923,9606.ENSP00000264144,…	SLC7A2,RALA,CX3CL1,CEACAM1,NFKBIA,KITLG,TNFSF10,KCNJ2,C3,CD93,JAG1,IRAK2,IL1RN,TLR2,THBS1,SLC12A2,PLEKHA4,KDR,LAMC2,ICAM1,NPR3,RASGRF2,LAMP3,CA2,SLC26A2,KCNT2,VCAM1,CLDN1,HHIP,ITGA2,TNFRSF21,CLEC4E,RRAD,DAB2,ANGPT2,SLC16A6,RHBDF2,LIMS2,P2RX7,SELE,PTPRB,ZBTB16,PLAUR,NTN4,BMF,CACNA1A,SEMA6C,GBP1,SGIP1,PPAP2B,SLC16A12,SLC2A6,PLAU,KCNK15,TNFSF13B,B4GALT1,DSP,DDX58,SDCBP2,MYO1B,CLDN14,IL6,DYSF,JAK3,CY…	0.00034	0.0085	cell periphery
Component	GO.0031982	41	2318	9606	9606.ENSP00000005257,9606.ENSP00000161559,9606.ENSP00000220751,9606.ENSP00000220809,9606.ENSP00000226574,9606.ENSP00000243347,9606.ENSP00000245907,9606.ENSP00000246006,9606.ENSP00000256458,9606.ENSP00000260010,9606.ENSP00000260356,9606.ENSP00000261292,9606.ENSP00000263341,9606.ENSP00000263923,9606.ENSP00000264832,9606.ENSP00000265598,9606.ENSP00000266671,9606.ENSP00000273371,9606.ENSP00000294728,…	RALA,CEACAM1,RIPK2,PLAT,NFKB1,TNFAIP6,C3,CD93,IRAK2,TLR2,THBS1,LIPG,IL1B,KDR,ICAM1,LAMP3,PHLDA1,PLA1A,VCAM1,PTX3,DAB2,PTPRB,PLAUR,GALNT15,BMF,CTSS,GBP5,GBP1,SGIP1,PLAU,B4GALT1,DSP,MYO1B,CXCL1,DYSF,JAK3,CD44,SERPINE2,GCH1,ADAM8,LDLR	0.00032	0.0085	vesicle
Component	GO.0035579	6	90	9606	9606.ENSP00000161559,9606.ENSP00000246006,9606.ENSP00000334928,9606.ENSP00000339328,9606.ENSP00000361850,9606.ENSP00000453302	CEACAM1,CD93,PTPRB,PLAUR,PLAU,ADAM8	0.00042	0.0098	specific granule membrane
Component	GO.0045177	12	370	9606	9606.ENSP00000161559,9606.ENSP00000220809,9606.ENSP00000254958,9606.ENSP00000262461,9606.ENSP00000285379,9606.ENSP00000286298,9606.ENSP00000294728,9606.ENSP00000295522,9606.ENSP00000376132,9606.ENSP00000398632,9606.ENSP00000454071,9606.ENSP00000475915	CEACAM1,PLAT,JAG1,SLC12A2,CA2,SLC26A2,VCAM1,CLDN1,MYO1B,CD44,LDLR,CNKSR3	0.00052	0.0112	apical part of cell
Component	GO.0005887	30	1564	9606	9606.ENSP00000004531,9606.ENSP00000161559,9606.ENSP00000241261,9606.ENSP00000243457,9606.ENSP00000254958,9606.ENSP00000260010,9606.ENSP00000262461,9606.ENSP00000263923,9606.ENSP00000264832,9606.ENSP00000265074,9606.ENSP00000286298,9606.ENSP00000294725,9606.ENSP00000295522,9606.ENSP00000296575,9606.ENSP00000296585,9606.ENSP00000296861,9606.ENSP00000319991,9606.ENSP00000330696,9606.ENSP00000331736,…	SLC7A2,CEACAM1,TNFSF10,KCNJ2,JAG1,TLR2,SLC12A2,KDR,ICAM1,NPR3,SLC26A2,KCNT2,CLDN1,HHIP,ITGA2,TNFRSF21,SLC16A6,P2RX7,SELE,PTPRB,PLAUR,SEMA6C,PPAP2B,SLC16A12,KCNK15,IL6,CD44,GPR176,ADAM8,LDLR	0.00065	0.0133	integral component of plasma membrane
Component	GO.0012506	18	743	9606	9606.ENSP00000005257,9606.ENSP00000161559,9606.ENSP00000246006,9606.ENSP00000260010,9606.ENSP00000265598,9606.ENSP00000273371,9606.ENSP00000313391,9606.ENSP00000334928,9606.ENSP00000339328,9606.ENSP00000359504,9606.ENSP00000360076,9606.ENSP00000361850,9606.ENSP00000369055,9606.ENSP00000369129,9606.ENSP00000386881,9606.ENSP00000398632,9606.ENSP00000453302,9606.ENSP00000454071	RALA,CEACAM1,CD93,TLR2,LAMP3,PLA1A,DAB2,PTPRB,PLAUR,GBP1,SGIP1,PLAU,B4GALT1,DSP,DYSF,CD44,ADAM8,LDLR	0.00071	0.0138	vesicle membrane
Component	GO.0005886	73	5159	9606	9606.ENSP00000004531,9606.ENSP00000005257,9606.ENSP00000006053,9606.ENSP00000161559,9606.ENSP00000216797,9606.ENSP00000228280,9606.ENSP00000241261,9606.ENSP00000243457,9606.ENSP00000245907,9606.ENSP00000246006,9606.ENSP00000254958,9606.ENSP00000256458,9606.ENSP00000259206,9606.ENSP00000260010,9606.ENSP00000260356,9606.ENSP00000262461,9606.ENSP00000263265,9606.ENSP00000263923,9606.ENSP00000264832,…	SLC7A2,RALA,CX3CL1,CEACAM1,NFKBIA,KITLG,TNFSF10,KCNJ2,C3,CD93,JAG1,IRAK2,IL1RN,TLR2,THBS1,SLC12A2,PLEKHA4,KDR,ICAM1,NPR3,RASGRF2,LAMP3,CA2,SLC26A2,KCNT2,VCAM1,CLDN1,HHIP,ITGA2,TNFRSF21,CLEC4E,RRAD,DAB2,ANGPT2,SLC16A6,RHBDF2,LIMS2,P2RX7,SELE,PTPRB,ZBTB16,PLAUR,NTN4,BMF,CACNA1A,SEMA6C,GBP1,SGIP1,PPAP2B,SLC16A12,SLC2A6,PLAU,KCNK15,TNFSF13B,B4GALT1,DSP,DDX58,SDCBP2,MYO1B,CLDN14,IL6,DYSF,JAK3,CYLD,CD4…	0.00094	0.0174	plasma membrane
Component	GO.0070821	5	73	9606	9606.ENSP00000161559,9606.ENSP00000246006,9606.ENSP00000334928,9606.ENSP00000361850,9606.ENSP00000453302	CEACAM1,CD93,PTPRB,PLAU,ADAM8	0.0011	0.0184	tertiary granule membrane
Component	GO.0031410	38	2226	9606	9606.ENSP00000005257,9606.ENSP00000161559,9606.ENSP00000220809,9606.ENSP00000226574,9606.ENSP00000243347,9606.ENSP00000245907,9606.ENSP00000246006,9606.ENSP00000256458,9606.ENSP00000260010,9606.ENSP00000260356,9606.ENSP00000261292,9606.ENSP00000263341,9606.ENSP00000263923,9606.ENSP00000265598,9606.ENSP00000266671,9606.ENSP00000273371,9606.ENSP00000294728,9606.ENSP00000295927,9606.ENSP00000313391,…	RALA,CEACAM1,PLAT,NFKB1,TNFAIP6,C3,CD93,IRAK2,TLR2,THBS1,LIPG,IL1B,KDR,LAMP3,PHLDA1,PLA1A,VCAM1,PTX3,DAB2,PTPRB,PLAUR,GALNT15,BMF,CTSS,GBP5,SGIP1,PLAU,B4GALT1,DSP,MYO1B,CXCL1,DYSF,JAK3,CD44,SERPINE2,GCH1,ADAM8,LDLR	0.0011	0.0184	cytoplasmic vesicle
Component	GO.0005794	28	1474	9606	9606.ENSP00000226299,9606.ENSP00000243457,9606.ENSP00000252809,9606.ENSP00000260010,9606.ENSP00000261292,9606.ENSP00000263923,9606.ENSP00000265087,9606.ENSP00000275015,9606.ENSP00000288840,9606.ENSP00000294728,9606.ENSP00000332151,9606.ENSP00000344260,9606.ENSP00000356782,9606.ENSP00000359488,9606.ENSP00000359490,9606.ENSP00000359497,9606.ENSP00000359504,9606.ENSP00000359512,9606.ENSP00000360296,…	LAP3,KCNJ2,GDF15,TLR2,LIPG,KDR,STC2,NFKBIE,SMAD6,VCAM1,DSE,GALNT15,BLZF1,GBP5,GBP4,GBP2,GBP1,GBP3,PPAP2B,ID1,RPGR,B4GALT1,TRIM22,CD44,KBTBD8,DOCK4,PDGFC,LDLR	0.0011	0.0184	Golgi apparatus
Component	GO.0030659	17	724	9606	9606.ENSP00000005257,9606.ENSP00000161559,9606.ENSP00000246006,9606.ENSP00000260010,9606.ENSP00000265598,9606.ENSP00000273371,9606.ENSP00000313391,9606.ENSP00000334928,9606.ENSP00000339328,9606.ENSP00000360076,9606.ENSP00000361850,9606.ENSP00000369055,9606.ENSP00000369129,9606.ENSP00000386881,9606.ENSP00000398632,9606.ENSP00000453302,9606.ENSP00000454071	RALA,CEACAM1,CD93,TLR2,LAMP3,PLA1A,DAB2,PTPRB,PLAUR,SGIP1,PLAU,B4GALT1,DSP,DYSF,CD44,ADAM8,LDLR	0.0014	0.0199	cytoplasmic vesicle membrane
Component	GO.0048471	16	670	9606	9606.ENSP00000234111,9606.ENSP00000242208,9606.ENSP00000245185,9606.ENSP00000264144,9606.ENSP00000265087,9606.ENSP00000265598,9606.ENSP00000275015,9606.ENSP00000296585,9606.ENSP00000331736,9606.ENSP00000359488,9606.ENSP00000359490,9606.ENSP00000359497,9606.ENSP00000359512,9606.ENSP00000365048,9606.ENSP00000376132,9606.ENSP00000392025	ODC1,INHBA,MT2A,LAMC2,STC2,LAMP3,NFKBIE,ITGA2,SELE,GBP5,GBP4,GBP2,GBP3,TNFSF13B,MYO1B,CYLD	0.0016	0.0217	perinuclear region of cytoplasm
Component	GO.0005902	5	82	9606	9606.ENSP00000161559,9606.ENSP00000285379,9606.ENSP00000286298,9606.ENSP00000294728,9606.ENSP00000398632	CEACAM1,CA2,SLC26A2,VCAM1,CD44	0.0019	0.0241	microvillus
Component	GO.0097443	2	5	9606	9606.ENSP00000263923,9606.ENSP00000454071	KDR,LDLR	0.002	0.0255	sorting endosome
Component	GO.0009897	8	223	9606	9606.ENSP00000260356,9606.ENSP00000264832,9606.ENSP00000294728,9606.ENSP00000296585,9606.ENSP00000330696,9606.ENSP00000369055,9606.ENSP00000415786,9606.ENSP00000454071	THBS1,ICAM1,VCAM1,ITGA2,P2RX7,B4GALT1,SERPINE2,LDLR	0.0024	0.0291	external side of plasma membrane
Component	GO.0098588	33	1950	9606	9606.ENSP00000161559,9606.ENSP00000246006,9606.ENSP00000256458,9606.ENSP00000258534,9606.ENSP00000260010,9606.ENSP00000265598,9606.ENSP00000273371,9606.ENSP00000296575,9606.ENSP00000313391,9606.ENSP00000332151,9606.ENSP00000334928,9606.ENSP00000339328,9606.ENSP00000344260,9606.ENSP00000346697,9606.ENSP00000356782,9606.ENSP00000359488,9606.ENSP00000359490,9606.ENSP00000359497,9606.ENSP00000359504,…	CEACAM1,CD93,IRAK2,DRAM1,TLR2,LAMP3,PLA1A,HHIP,DAB2,DSE,PTPRB,PLAUR,GALNT15,BMF,BLZF1,GBP5,GBP4,GBP2,GBP1,GBP3,SGIP1,PPAP2B,PLAU,ZC3H12A,B4GALT1,DSP,MYO1B,BCL2L11,NAV3,CD44,PDGFC,ADAM8,LDLR	0.0027	0.0314	bounding membrane of organelle
Component	GO.1904724	4	55	9606	9606.ENSP00000243347,9606.ENSP00000295927,9606.ENSP00000357981,9606.ENSP00000379110	TNFAIP6,PTX3,CTSS,CXCL1	0.0029	0.0332	tertiary granule lumen
Function	GO.0005102	55	1513	9606	9606.ENSP00000005257,9606.ENSP00000006053,9606.ENSP00000220751,9606.ENSP00000220809,9606.ENSP00000222553,9606.ENSP00000225474,9606.ENSP00000225831,9606.ENSP00000226317,9606.ENSP00000228280,9606.ENSP00000228534,9606.ENSP00000241261,9606.ENSP00000242208,9606.ENSP00000245907,9606.ENSP00000252809,9606.ENSP00000254958,9606.ENSP00000257570,9606.ENSP00000259030,9606.ENSP00000259206,9606.ENSP00000260010,…	RALA,CX3CL1,RIPK2,PLAT,NAMPT,CSF3,CCL2,CXCL6,KITLG,IL23A,TNFSF10,INHBA,C3,GDF15,JAG1,OASL,RTP4,IL1RN,TLR2,THBS1,IL1A,IL1B,KDR,ICAM1,STC2,SEMA3C,SEMA3A,SEMA3D,SMAD6,VCAM1,CXCL3,CXCL5,ITGA2,FGF5,ANGPT2,P2RX7,PLAUR,NR4A2,CCL20,ANGPTL2,TRAF1,TNFSF13B,ESM1,IL24,TYMP,CXCL1,IL18BP,IL6,JAK3,DOCK4,SERPINE2,PDGFC,CXCL2,IL32,SAA2	8.41e-17	5.08e-14	signaling receptor binding
Function	GO.0005515	123	6607	9606	9606.ENSP00000005257,9606.ENSP00000006053,9606.ENSP00000161559,9606.ENSP00000216797,9606.ENSP00000220751,9606.ENSP00000220809,9606.ENSP00000221452,9606.ENSP00000222553,9606.ENSP00000225474,9606.ENSP00000225831,9606.ENSP00000226317,9606.ENSP00000226574,9606.ENSP00000228280,9606.ENSP00000228534,9606.ENSP00000234111,9606.ENSP00000241261,9606.ENSP00000242208,9606.ENSP00000243457,9606.ENSP00000245907,…	RALA,CX3CL1,CEACAM1,NFKBIA,RIPK2,PLAT,RELB,NAMPT,CSF3,CCL2,CXCL6,NFKB1,KITLG,IL23A,ODC1,TNFSF10,INHBA,KCNJ2,C3,CD93,GDF15,JAG1,IRAK2,BHLHE40,FST,OASL,RTP4,IL1RN,TLR2,THBS1,SLC12A2,IL1A,IL1B,IFIH1,KDR,ICAM1,NPR3,RASGRF2,STC2,SEMA3C,SEMA3A,JDP2,SEMA3D,TIMP4,SMAD6,VCAM1,CLDN1,PTX3,CXCL3,CXCL5,HHIP,ITGA2,SOX17,RRAD,FGF5,DAB2,ANGPT2,TNIP1,HMGCS1,RHBDF2,P2RX7,SELE,MXD4,ZBTB16,PLAUR,NTN4,RAPGEF5,NR4A2,C…	9.11e-16	2.75e-13	protein binding
Function	GO.0030545	30	483	9606	9606.ENSP00000006053,9606.ENSP00000222553,9606.ENSP00000225474,9606.ENSP00000225831,9606.ENSP00000226317,9606.ENSP00000228280,9606.ENSP00000228534,9606.ENSP00000241261,9606.ENSP00000242208,9606.ENSP00000252809,9606.ENSP00000254958,9606.ENSP00000259206,9606.ENSP00000263339,9606.ENSP00000263341,9606.ENSP00000265087,9606.ENSP00000265362,9606.ENSP00000296026,9606.ENSP00000296027,9606.ENSP00000311697,…	CX3CL1,NAMPT,CSF3,CCL2,CXCL6,KITLG,IL23A,TNFSF10,INHBA,GDF15,JAG1,IL1RN,IL1A,IL1B,STC2,SEMA3A,CXCL3,CXCL5,FGF5,CCL20,TNFSF13B,IL24,TYMP,CXCL1,IL18BP,IL6,PDGFC,CXCL2,IL32,SAA2	6.92e-15	1.39e-12	receptor regulator activity
Function	GO.0048018	29	458	9606	9606.ENSP00000006053,9606.ENSP00000222553,9606.ENSP00000225474,9606.ENSP00000225831,9606.ENSP00000226317,9606.ENSP00000228280,9606.ENSP00000228534,9606.ENSP00000241261,9606.ENSP00000242208,9606.ENSP00000252809,9606.ENSP00000254958,9606.ENSP00000259206,9606.ENSP00000263339,9606.ENSP00000263341,9606.ENSP00000265087,9606.ENSP00000265362,9606.ENSP00000296026,9606.ENSP00000296027,9606.ENSP00000311697,…	CX3CL1,NAMPT,CSF3,CCL2,CXCL6,KITLG,IL23A,TNFSF10,INHBA,GDF15,JAG1,IL1RN,IL1A,IL1B,STC2,SEMA3A,CXCL3,CXCL5,FGF5,CCL20,TNFSF13B,IL24,TYMP,CXCL1,IL6,PDGFC,CXCL2,IL32,SAA2	1.28e-14	1.93e-12	receptor ligand activity
Function	GO.0005125	21	216	9606	9606.ENSP00000006053,9606.ENSP00000222553,9606.ENSP00000225474,9606.ENSP00000225831,9606.ENSP00000226317,9606.ENSP00000228534,9606.ENSP00000241261,9606.ENSP00000242208,9606.ENSP00000252809,9606.ENSP00000259206,9606.ENSP00000263339,9606.ENSP00000263341,9606.ENSP00000296026,9606.ENSP00000296027,9606.ENSP00000351671,9606.ENSP00000365048,9606.ENSP00000375795,9606.ENSP00000379110,9606.ENSP00000385675,…	CX3CL1,NAMPT,CSF3,CCL2,CXCL6,IL23A,TNFSF10,INHBA,GDF15,IL1RN,IL1A,IL1B,CXCL3,CXCL5,CCL20,TNFSF13B,IL24,CXCL1,IL6,CXCL2,IL32	3.49e-14	4.22e-12	cytokine activity
Function	GO.0005126	21	272	9606	9606.ENSP00000006053,9606.ENSP00000225474,9606.ENSP00000225831,9606.ENSP00000226317,9606.ENSP00000228280,9606.ENSP00000228534,9606.ENSP00000241261,9606.ENSP00000242208,9606.ENSP00000252809,9606.ENSP00000259206,9606.ENSP00000263339,9606.ENSP00000263341,9606.ENSP00000288840,9606.ENSP00000296026,9606.ENSP00000296027,9606.ENSP00000351671,9606.ENSP00000362994,9606.ENSP00000365048,9606.ENSP00000379110,…	CX3CL1,CSF3,CCL2,CXCL6,KITLG,IL23A,TNFSF10,INHBA,GDF15,IL1RN,IL1A,IL1B,SMAD6,CXCL3,CXCL5,CCL20,TRAF1,TNFSF13B,CXCL1,IL6,CXCL2	2.21e-12	2.22e-10	cytokine receptor binding
Function	GO.0042802	48	1754	9606	9606.ENSP00000161559,9606.ENSP00000216797,9606.ENSP00000220751,9606.ENSP00000221452,9606.ENSP00000222553,9606.ENSP00000226574,9606.ENSP00000234111,9606.ENSP00000241261,9606.ENSP00000242208,9606.ENSP00000243457,9606.ENSP00000252809,9606.ENSP00000256458,9606.ENSP00000256495,9606.ENSP00000260010,9606.ENSP00000260356,9606.ENSP00000263642,9606.ENSP00000263923,9606.ENSP00000265074,9606.ENSP00000265087,…	CEACAM1,NFKBIA,RIPK2,RELB,NAMPT,NFKB1,ODC1,TNFSF10,INHBA,KCNJ2,GDF15,IRAK2,BHLHE40,TLR2,THBS1,IFIH1,KDR,NPR3,STC2,SMAD6,CLDN1,PTX3,CXCL5,TNIP1,HMGCS1,P2RX7,ZBTB16,NR4A2,GBP5,GBP4,GBP2,GBP1,GBP3,IFIT3,TRAF1,ID1,SAT1,B4GALT1,DDX58,SDCBP2,ETS1,TYMP,CLDN14,GCH1,PDGFC,SOD2,LDLR,TNFAIP3	2.57e-10	2.22e-08	identical protein binding
Function	GO.0008009	8	48	9606	9606.ENSP00000006053,9606.ENSP00000225831,9606.ENSP00000226317,9606.ENSP00000296026,9606.ENSP00000296027,9606.ENSP00000351671,9606.ENSP00000379110,9606.ENSP00000427279	CX3CL1,CCL2,CXCL6,CXCL3,CXCL5,CCL20,CXCL1,CXCL2	8.61e-08	6.5e-06	chemokine activity
Function	GO.0005488	156	11878	9606	9606.ENSP00000005257,9606.ENSP00000006053,9606.ENSP00000161559,9606.ENSP00000216797,9606.ENSP00000220751,9606.ENSP00000220809,9606.ENSP00000221452,9606.ENSP00000222553,9606.ENSP00000225474,9606.ENSP00000225831,9606.ENSP00000226299,9606.ENSP00000226317,9606.ENSP00000226574,9606.ENSP00000228280,9606.ENSP00000228534,9606.ENSP00000234111,9606.ENSP00000241261,9606.ENSP00000242208,9606.ENSP00000243347,…	RALA,CX3CL1,CEACAM1,NFKBIA,RIPK2,PLAT,RELB,NAMPT,CSF3,CCL2,LAP3,CXCL6,NFKB1,KITLG,IL23A,ODC1,TNFSF10,INHBA,TNFAIP6,KCNJ2,MT2A,IRF1,C3,CD93,DHX58,GDF15,TRIM47,JAG1,IRAK2,BHLHE40,FST,OASL,RTP4,IL1RN,GMPR,TLR2,THBS1,LIPG,SLC12A2,PLEKHA4,IL1A,IL1B,BIRC3,IFIH1,KDR,LAMC2,ICAM1,NPR3,RASGRF2,STC2,SEMA3C,SEMA3A,SQLE,JDP2,ZC3H12C,SEMA3D,ABI3BP,CA2,TIMP4,SMAD6,BCL6B,KCNT2,VCAM1,CLDN1,PTX3,CXCL3,CXCL5,HHIP,I…	9.41e-08	6.5e-06	binding
Function	GO.0098772	42	1793	9606	9606.ENSP00000006053,9606.ENSP00000222543,9606.ENSP00000222553,9606.ENSP00000225474,9606.ENSP00000225831,9606.ENSP00000226317,9606.ENSP00000228280,9606.ENSP00000228534,9606.ENSP00000241261,9606.ENSP00000242208,9606.ENSP00000245907,9606.ENSP00000252809,9606.ENSP00000254958,9606.ENSP00000259206,9606.ENSP00000263339,9606.ENSP00000263341,9606.ENSP00000263464,9606.ENSP00000265080,9606.ENSP00000265087,…	CX3CL1,TFPI2,NAMPT,CSF3,CCL2,CXCL6,KITLG,IL23A,TNFSF10,INHBA,C3,GDF15,JAG1,IL1RN,IL1A,IL1B,BIRC3,RASGRF2,STC2,SEMA3A,TIMP4,CXCL3,CXCL5,FGF5,RAPGEF5,CCL20,TNFSF13B,RPGR,IL24,TYMP,CXCL1,IL18BP,IL6,JAK3,DOCK4,SERPINE2,PDGFC,CXCL2,TNFAIP8,IL32,SAA2,FRY	3.22e-07	1.94e-05	molecular function regulator
Function	GO.0046983	33	1301	9606	9606.ENSP00000161559,9606.ENSP00000220751,9606.ENSP00000222553,9606.ENSP00000226574,9606.ENSP00000234111,9606.ENSP00000242208,9606.ENSP00000252809,9606.ENSP00000256458,9606.ENSP00000256495,9606.ENSP00000260010,9606.ENSP00000265074,9606.ENSP00000265087,9606.ENSP00000267569,9606.ENSP00000296585,9606.ENSP00000297316,9606.ENSP00000322706,9606.ENSP00000330696,9606.ENSP00000337889,9606.ENSP00000338157,…	CEACAM1,RIPK2,NAMPT,NFKB1,ODC1,INHBA,GDF15,IRAK2,BHLHE40,TLR2,NPR3,STC2,JDP2,ITGA2,SOX17,HMGCS1,P2RX7,MXD4,ZBTB16,NR4A2,E2F2,GBP5,GBP4,GBP2,GBP1,GBP3,ID1,B4GALT1,SDCBP2,BCL2L11,TYMP,GCH1,PDGFC	1.41e-06	7.1e-05	protein dimerization activity
Function	GO.0045236	5	16	9606	9606.ENSP00000226317,9606.ENSP00000296026,9606.ENSP00000296027,9606.ENSP00000379110,9606.ENSP00000427279	CXCL6,CXCL3,CXCL5,CXCL1,CXCL2	1.76e-06	8.09e-05	CXCR chemokine receptor binding
Function	GO.0042803	25	830	9606	9606.ENSP00000161559,9606.ENSP00000220751,9606.ENSP00000222553,9606.ENSP00000226574,9606.ENSP00000234111,9606.ENSP00000252809,9606.ENSP00000256458,9606.ENSP00000256495,9606.ENSP00000265074,9606.ENSP00000265087,9606.ENSP00000322706,9606.ENSP00000330696,9606.ENSP00000338157,9606.ENSP00000344479,9606.ENSP00000359488,9606.ENSP00000359490,9606.ENSP00000359497,9606.ENSP00000359504,9606.ENSP00000359512,…	CEACAM1,RIPK2,NAMPT,NFKB1,ODC1,GDF15,IRAK2,BHLHE40,NPR3,STC2,HMGCS1,P2RX7,ZBTB16,NR4A2,GBP5,GBP4,GBP2,GBP1,GBP3,ID1,B4GALT1,SDCBP2,TYMP,GCH1,PDGFC	1.74e-06	8.09e-05	protein homodimerization activity
Function	GO.0008083	10	160	9606	9606.ENSP00000225474,9606.ENSP00000228280,9606.ENSP00000242208,9606.ENSP00000252809,9606.ENSP00000254958,9606.ENSP00000311697,9606.ENSP00000379038,9606.ENSP00000379110,9606.ENSP00000385675,9606.ENSP00000422464	CSF3,KITLG,INHBA,GDF15,JAG1,FGF5,TYMP,CXCL1,IL6,PDGFC	8.97e-06	0.00036	growth factor activity
Function	GO.0050839	10	200	9606	9606.ENSP00000006053,9606.ENSP00000260356,9606.ENSP00000263341,9606.ENSP00000263923,9606.ENSP00000264832,9606.ENSP00000294728,9606.ENSP00000296585,9606.ENSP00000369129,9606.ENSP00000370812,9606.ENSP00000453302	CX3CL1,THBS1,IL1B,KDR,ICAM1,VCAM1,ITGA2,DSP,ESM1,ADAM8	5.53e-05	0.002	cell adhesion molecule binding
Function	GO.0005178	8	122	9606	9606.ENSP00000006053,9606.ENSP00000260356,9606.ENSP00000263341,9606.ENSP00000263923,9606.ENSP00000264832,9606.ENSP00000294728,9606.ENSP00000296585,9606.ENSP00000370812	CX3CL1,THBS1,IL1B,KDR,ICAM1,VCAM1,ITGA2,ESM1	5.22e-05	0.002	integrin binding
Function	GO.0070851	8	131	9606	9606.ENSP00000225474,9606.ENSP00000259206,9606.ENSP00000263339,9606.ENSP00000263341,9606.ENSP00000311697,9606.ENSP00000370812,9606.ENSP00000385675,9606.ENSP00000422464	CSF3,IL1RN,IL1A,IL1B,FGF5,ESM1,IL6,PDGFC	8.38e-05	0.0028	growth factor receptor binding
Function	GO.0005539	10	219	9606	9606.ENSP00000226317,9606.ENSP00000243347,9606.ENSP00000260010,9606.ENSP00000260356,9606.ENSP00000261292,9606.ENSP00000264144,9606.ENSP00000284322,9606.ENSP00000352606,9606.ENSP00000398632,9606.ENSP00000415786	CXCL6,TNFAIP6,TLR2,THBS1,LIPG,LAMC2,ABI3BP,HAPLN3,CD44,SERPINE2	0.00011	0.0036	glycosaminoglycan binding
Function	GO.0001664	11	272	9606	9606.ENSP00000005257,9606.ENSP00000006053,9606.ENSP00000225831,9606.ENSP00000226317,9606.ENSP00000245907,9606.ENSP00000259030,9606.ENSP00000296026,9606.ENSP00000296027,9606.ENSP00000351671,9606.ENSP00000379110,9606.ENSP00000427279	RALA,CX3CL1,CCL2,CXCL6,C3,RTP4,CXCL3,CXCL5,CCL20,CXCL1,CXCL2	0.00015	0.0044	G protein-coupled receptor binding
Function	GO.0008970	3	10	9606	9606.ENSP00000261292,9606.ENSP00000273371,9606.ENSP00000472546	LIPG,PLA1A,PLA2G4C	0.00027	0.0077	phospholipase A1 activity
Function	GO.0043236	4	28	9606	9606.ENSP00000260356,9606.ENSP00000296585,9606.ENSP00000340998,9606.ENSP00000357981	THBS1,ITGA2,NTN4,CTSS	0.00029	0.0079	laminin binding
Function	GO.0000987	15	526	9606	9606.ENSP00000221452,9606.ENSP00000226574,9606.ENSP00000245414,9606.ENSP00000256495,9606.ENSP00000267569,9606.ENSP00000288840,9606.ENSP00000338157,9606.ENSP00000344479,9606.ENSP00000355249,9606.ENSP00000358983,9606.ENSP00000360231,9606.ENSP00000372170,9606.ENSP00000376436,9606.ENSP00000431603,9606.ENSP00000437621	RELB,NFKB1,IRF1,BHLHE40,JDP2,SMAD6,ZBTB16,NR4A2,E2F2,NFKB2,NFIA,MSX1,ETS1,POU2F2,HMGA2	0.0004	0.0105	proximal promoter sequence-specific DNA binding
Function	GO.0044877	22	968	9606	9606.ENSP00000006053,9606.ENSP00000216797,9606.ENSP00000256759,9606.ENSP00000260010,9606.ENSP00000260356,9606.ENSP00000263341,9606.ENSP00000263642,9606.ENSP00000263923,9606.ENSP00000264832,9606.ENSP00000284322,9606.ENSP00000294728,9606.ENSP00000296585,9606.ENSP00000357981,9606.ENSP00000362179,9606.ENSP00000365280,9606.ENSP00000366326,9606.ENSP00000370812,9606.ENSP00000376132,9606.ENSP00000376943,…	CX3CL1,NFKBIA,FST,TLR2,THBS1,IL1B,IFIH1,KDR,ICAM1,ABI3BP,VCAM1,ITGA2,CTSS,ZC3H12A,ID1,NEBL,ESM1,MYO1B,BCL2L11,CD44,HMGA2,LDLR	0.00043	0.0107	protein-containing complex binding
Function	GO.0043394	4	32	9606	9606.ENSP00000256759,9606.ENSP00000260356,9606.ENSP00000296585,9606.ENSP00000357981	FST,THBS1,ITGA2,CTSS	0.00046	0.011	proteoglycan binding
Function	GO.0005518	5	61	9606	9606.ENSP00000260356,9606.ENSP00000284322,9606.ENSP00000296585,9606.ENSP00000357981,9606.ENSP00000398632	THBS1,ABI3BP,ITGA2,CTSS,CD44	0.00053	0.0124	collagen binding
Function	GO.0038191	3	14	9606	9606.ENSP00000265361,9606.ENSP00000265362,9606.ENSP00000284136	SEMA3C,SEMA3A,SEMA3D	0.00062	0.0138	neuropilin binding
Function	GO.0005149	3	18	9606	9606.ENSP00000259206,9606.ENSP00000263339,9606.ENSP00000263341	IL1RN,IL1A,IL1B	0.0012	0.0246	interleukin-1 receptor binding
Function	GO.0000977	16	647	9606	9606.ENSP00000221452,9606.ENSP00000226574,9606.ENSP00000245414,9606.ENSP00000256495,9606.ENSP00000267569,9606.ENSP00000288840,9606.ENSP00000293805,9606.ENSP00000338157,9606.ENSP00000341843,9606.ENSP00000344479,9606.ENSP00000358983,9606.ENSP00000360231,9606.ENSP00000372170,9606.ENSP00000376436,9606.ENSP00000431603,9606.ENSP00000437621	RELB,NFKB1,IRF1,BHLHE40,JDP2,SMAD6,BCL6B,ZBTB16,ETV7,NR4A2,NFKB2,NFIA,MSX1,ETS1,POU2F2,HMGA2	0.0011	0.0246	RNA polymerase II transcription regulatory region sequence-specific DNA binding
Function	GO.0070697	2	4	9606	9606.ENSP00000242208,9606.ENSP00000288840	INHBA,SMAD6	0.0015	0.0297	activin receptor binding
Function	GO.1990837	17	747	9606	9606.ENSP00000221452,9606.ENSP00000226574,9606.ENSP00000245414,9606.ENSP00000256495,9606.ENSP00000267569,9606.ENSP00000288840,9606.ENSP00000293805,9606.ENSP00000338157,9606.ENSP00000341843,9606.ENSP00000344479,9606.ENSP00000355249,9606.ENSP00000358983,9606.ENSP00000360231,9606.ENSP00000372170,9606.ENSP00000376436,9606.ENSP00000431603,9606.ENSP00000437621	RELB,NFKB1,IRF1,BHLHE40,JDP2,SMAD6,BCL6B,ZBTB16,ETV7,NR4A2,E2F2,NFKB2,NFIA,MSX1,ETS1,POU2F2,HMGA2	0.0019	0.0367	sequence-specific double-stranded DNA binding
Function	GO.0000978	13	492	9606	9606.ENSP00000221452,9606.ENSP00000226574,9606.ENSP00000245414,9606.ENSP00000256495,9606.ENSP00000267569,9606.ENSP00000288840,9606.ENSP00000338157,9606.ENSP00000344479,9606.ENSP00000358983,9606.ENSP00000360231,9606.ENSP00000376436,9606.ENSP00000431603,9606.ENSP00000437621	RELB,NFKB1,IRF1,BHLHE40,JDP2,SMAD6,ZBTB16,NR4A2,NFKB2,NFIA,ETS1,POU2F2,HMGA2	0.0019	0.0367	RNA polymerase II proximal promoter sequence-specific DNA binding
Function	GO.0043426	2	5	9606	9606.ENSP00000256495,9606.ENSP00000361458	BHLHE40,TSC22D3	0.002	0.0375	MRF binding
Function	GO.0003690	18	828	9606	9606.ENSP00000221452,9606.ENSP00000226574,9606.ENSP00000245414,9606.ENSP00000256495,9606.ENSP00000267569,9606.ENSP00000288840,9606.ENSP00000293805,9606.ENSP00000338157,9606.ENSP00000341843,9606.ENSP00000344479,9606.ENSP00000355249,9606.ENSP00000358983,9606.ENSP00000360231,9606.ENSP00000369213,9606.ENSP00000372170,9606.ENSP00000376436,9606.ENSP00000431603,9606.ENSP00000437621	RELB,NFKB1,IRF1,BHLHE40,JDP2,SMAD6,BCL6B,ZBTB16,ETV7,NR4A2,E2F2,NFKB2,NFIA,DDX58,MSX1,ETS1,POU2F2,HMGA2	0.0023	0.0405	double-stranded DNA binding
Function	GO.0000976	18	829	9606	9606.ENSP00000221452,9606.ENSP00000226574,9606.ENSP00000245414,9606.ENSP00000256495,9606.ENSP00000267569,9606.ENSP00000288840,9606.ENSP00000293805,9606.ENSP00000297316,9606.ENSP00000338157,9606.ENSP00000341843,9606.ENSP00000344479,9606.ENSP00000355249,9606.ENSP00000358983,9606.ENSP00000360231,9606.ENSP00000372170,9606.ENSP00000376436,9606.ENSP00000431603,9606.ENSP00000437621	RELB,NFKB1,IRF1,BHLHE40,JDP2,SMAD6,BCL6B,SOX17,ZBTB16,ETV7,NR4A2,E2F2,NFKB2,NFIA,MSX1,ETS1,POU2F2,HMGA2	0.0023	0.0405	transcription regulatory region sequence-specific DNA binding
Function	GO.0001227	8	229	9606	9606.ENSP00000226574,9606.ENSP00000256495,9606.ENSP00000267569,9606.ENSP00000293805,9606.ENSP00000338157,9606.ENSP00000341843,9606.ENSP00000372170,9606.ENSP00000437621	NFKB1,BHLHE40,JDP2,BCL6B,ZBTB16,ETV7,MSX1,HMGA2	0.0028	0.045	DNA-binding transcription repressor activity, RNA polymerase II-specific
Function	GO.1901681	8	234	9606	9606.ENSP00000226317,9606.ENSP00000256759,9606.ENSP00000260356,9606.ENSP00000261292,9606.ENSP00000264144,9606.ENSP00000284322,9606.ENSP00000296585,9606.ENSP00000415786	CXCL6,FST,THBS1,LIPG,LAMC2,ABI3BP,ITGA2,SERPINE2	0.0032	0.049	sulfur compound binding
Function	GO.0043168	42	2696	9606	9606.ENSP00000005257,9606.ENSP00000220751,9606.ENSP00000226317,9606.ENSP00000243347,9606.ENSP00000243457,9606.ENSP00000251642,9606.ENSP00000254958,9606.ENSP00000256458,9606.ENSP00000256759,9606.ENSP00000257570,9606.ENSP00000260356,9606.ENSP00000261292,9606.ENSP00000263265,9606.ENSP00000263642,9606.ENSP00000263923,9606.ENSP00000264144,9606.ENSP00000265074,9606.ENSP00000265896,9606.ENSP00000284322,…	RALA,RIPK2,CXCL6,TNFAIP6,KCNJ2,DHX58,JAG1,IRAK2,FST,OASL,THBS1,LIPG,PLEKHA4,IFIH1,KDR,LAMC2,NPR3,SQLE,ABI3BP,KCNT2,ITGA2,RRAD,P2RX7,SELE,HAPLN3,NUAK2,GBP5,GBP4,GBP2,GBP1,GBP3,SGIP1,DDX58,SDCBP2,MYO1B,NAV3,DYSF,JAK3,CD44,SERPINE2,GCH1,PLA2G4C	0.0032	0.049	anion binding
Function	GO.0005540	3	27	9606	9606.ENSP00000243347,9606.ENSP00000352606,9606.ENSP00000398632	TNFAIP6,HAPLN3,CD44	0.0033	0.0492	hyaluronic acid binding
InterPro	IPR037684	5	7	9606	9606.ENSP00000359488,9606.ENSP00000359490,9606.ENSP00000359497,9606.ENSP00000359504,9606.ENSP00000359512	GBP5,GBP4,GBP2,GBP1,GBP3	7.36e-08	2.52e-05	Guanylate-binding protein, C-terminal
InterPro	IPR036048	8	43	9606	9606.ENSP00000006053,9606.ENSP00000225831,9606.ENSP00000226317,9606.ENSP00000296026,9606.ENSP00000296027,9606.ENSP00000351671,9606.ENSP00000379110,9606.ENSP00000427279	CX3CL1,CCL2,CXCL6,CXCL3,CXCL5,CCL20,CXCL1,CXCL2	4.03e-08	2.52e-05	Chemokine interleukin-8-like superfamily
InterPro	IPR001811	8	43	9606	9606.ENSP00000006053,9606.ENSP00000225831,9606.ENSP00000226317,9606.ENSP00000296026,9606.ENSP00000296027,9606.ENSP00000351671,9606.ENSP00000379110,9606.ENSP00000427279	CX3CL1,CCL2,CXCL6,CXCL3,CXCL5,CCL20,CXCL1,CXCL2	4.03e-08	2.52e-05	Chemokine interleukin-8-like domain
InterPro	IPR003191	5	9	9606	9606.ENSP00000359488,9606.ENSP00000359490,9606.ENSP00000359497,9606.ENSP00000359504,9606.ENSP00000359512	GBP5,GBP4,GBP2,GBP1,GBP3	1.83e-07	2.86e-05	Guanylate-binding protein/Atlastin, C-terminal
InterPro	IPR036543	5	10	9606	9606.ENSP00000359488,9606.ENSP00000359490,9606.ENSP00000359497,9606.ENSP00000359504,9606.ENSP00000359512	GBP5,GBP4,GBP2,GBP1,GBP3	2.72e-07	3.4e-05	Guanylate-binding protein, C-terminal domain superfamily
InterPro	IPR030386	5	11	9606	9606.ENSP00000359488,9606.ENSP00000359490,9606.ENSP00000359497,9606.ENSP00000359504,9606.ENSP00000359512	GBP5,GBP4,GBP2,GBP1,GBP3	3.93e-07	4.09e-05	GB1/RHD3-type guanine nucleotide-binding (G) domain
InterPro	IPR015894	5	11	9606	9606.ENSP00000359488,9606.ENSP00000359490,9606.ENSP00000359497,9606.ENSP00000359504,9606.ENSP00000359512	GBP5,GBP4,GBP2,GBP1,GBP3	3.93e-07	4.09e-05	Guanylate-binding protein, N-terminal
InterPro	IPR018048	5	13	9606	9606.ENSP00000226317,9606.ENSP00000296026,9606.ENSP00000296027,9606.ENSP00000379110,9606.ENSP00000427279	CXCL6,CXCL3,CXCL5,CXCL1,CXCL2	7.58e-07	5.92e-05	CXC chemokine, conserved site
InterPro	IPR001089	5	13	9606	9606.ENSP00000226317,9606.ENSP00000296026,9606.ENSP00000296027,9606.ENSP00000379110,9606.ENSP00000427279	CXCL6,CXCL3,CXCL5,CXCL1,CXCL2	7.58e-07	5.92e-05	CXC chemokine
InterPro	IPR033899	5	14	9606	9606.ENSP00000226317,9606.ENSP00000296026,9606.ENSP00000296027,9606.ENSP00000379110,9606.ENSP00000427279	CXCL6,CXCL3,CXCL5,CXCL1,CXCL2	1.02e-06	6.38e-05	CXC Chemokine domain
InterPro	IPR041204	3	3	9606	9606.ENSP00000251642,9606.ENSP00000263642,9606.ENSP00000369213	DHX58,IFIH1,DDX58	1.97e-05	0.0011	RIG-I receptor, C-terminal
InterPro	IPR038557	3	3	9606	9606.ENSP00000251642,9606.ENSP00000263642,9606.ENSP00000369213	DHX58,IFIH1,DDX58	1.97e-05	0.0011	RIG-I-like receptor, C-terminal domain superfamily
InterPro	IPR021673	3	3	9606	9606.ENSP00000251642,9606.ENSP00000263642,9606.ENSP00000369213	DHX58,IFIH1,DDX58	1.97e-05	0.0011	RIG-I-like receptor, C-terminal regulatory domain
InterPro	IPR000742	11	225	9606	9606.ENSP00000220809,9606.ENSP00000246006,9606.ENSP00000254958,9606.ENSP00000260356,9606.ENSP00000264144,9606.ENSP00000296575,9606.ENSP00000331736,9606.ENSP00000361850,9606.ENSP00000438615,9606.ENSP00000453302,9606.ENSP00000454071	PLAT,CD93,JAG1,THBS1,LAMC2,HHIP,SELE,PLAU,C1R,ADAM8,LDLR	2.85e-05	0.0013	EGF-like domain
InterPro	IPR020877	3	4	9606	9606.ENSP00000259206,9606.ENSP00000263339,9606.ENSP00000263341	IL1RN,IL1A,IL1B	3.42e-05	0.0014	Interleukin-1 conserved site
InterPro	IPR013032	10	193	9606	9606.ENSP00000220809,9606.ENSP00000246006,9606.ENSP00000254958,9606.ENSP00000260356,9606.ENSP00000296575,9606.ENSP00000331736,9606.ENSP00000361850,9606.ENSP00000438615,9606.ENSP00000453302,9606.ENSP00000454071	PLAT,CD93,JAG1,THBS1,HHIP,SELE,PLAU,C1R,ADAM8,LDLR	4.15e-05	0.0016	EGF-like, conserved site
InterPro	IPR033926	3	5	9606	9606.ENSP00000221452,9606.ENSP00000226574,9606.ENSP00000358983	RELB,NFKB1,NFKB2	5.42e-05	0.002	NFkappaB IPT domain
InterPro	IPR030492	3	5	9606	9606.ENSP00000221452,9606.ENSP00000226574,9606.ENSP00000358983	RELB,NFKB1,NFKB2	5.42e-05	0.002	Rel homology domain, conserved site
InterPro	IPR000451	3	5	9606	9606.ENSP00000221452,9606.ENSP00000226574,9606.ENSP00000358983	RELB,NFKB1,NFKB2	5.42e-05	0.002	NF-kappa-B/Dorsal
InterPro	IPR027231	4	20	9606	9606.ENSP00000265361,9606.ENSP00000265362,9606.ENSP00000284136,9606.ENSP00000357909	SEMA3C,SEMA3A,SEMA3D,SEMA6C	9.05e-05	0.0028	Semaphorin
InterPro	IPR037059	3	10	9606	9606.ENSP00000221452,9606.ENSP00000226574,9606.ENSP00000358983	RELB,NFKB1,NFKB2	0.00027	0.0079	Rel homology domain (RHD), DNA-binding domain superfamily
InterPro	IPR032397	3	10	9606	9606.ENSP00000221452,9606.ENSP00000226574,9606.ENSP00000358983	RELB,NFKB1,NFKB2	0.00027	0.0079	Rel homology dimerisation domain
InterPro	IPR011539	3	10	9606	9606.ENSP00000221452,9606.ENSP00000226574,9606.ENSP00000358983	RELB,NFKB1,NFKB2	0.00027	0.0079	Rel homology domain (RHD), DNA-binding domain
InterPro	IPR009079	5	53	9606	9606.ENSP00000225474,9606.ENSP00000228280,9606.ENSP00000228534,9606.ENSP00000375795,9606.ENSP00000385675	CSF3,KITLG,IL23A,IL24,IL6	0.00029	0.0079	Four-helical cytokine-like, core
InterPro	IPR000975	3	10	9606	9606.ENSP00000259206,9606.ENSP00000263339,9606.ENSP00000263341	IL1RN,IL1A,IL1B	0.00027	0.0079	Interleukin-1 family
InterPro	IPR011029	6	86	9606	9606.ENSP00000220751,9606.ENSP00000226574,9606.ENSP00000256458,9606.ENSP00000263464,9606.ENSP00000296861,9606.ENSP00000358983	RIPK2,NFKB1,IRAK2,BIRC3,TNFRSF21,NFKB2	0.00034	0.0081	Death-like domain superfamily
InterPro	IPR036352	4	31	9606	9606.ENSP00000265361,9606.ENSP00000265362,9606.ENSP00000284136,9606.ENSP00000357909	SEMA3C,SEMA3A,SEMA3D,SEMA6C	0.00041	0.0095	Sema domain superfamily
InterPro	IPR001627	4	31	9606	9606.ENSP00000265361,9606.ENSP00000265362,9606.ENSP00000284136,9606.ENSP00000357909	SEMA3C,SEMA3A,SEMA3D,SEMA6C	0.00041	0.0095	Sema domain
InterPro	IPR008996	4	33	9606	9606.ENSP00000259206,9606.ENSP00000263339,9606.ENSP00000263341,9606.ENSP00000311697	IL1RN,IL1A,IL1B,FGF5	0.00051	0.0109	Cytokine IL1/FGF
InterPro	IPR000488	4	34	9606	9606.ENSP00000226574,9606.ENSP00000256458,9606.ENSP00000296861,9606.ENSP00000358983	NFKB1,IRAK2,TNFRSF21,NFKB2	0.00056	0.0117	Death domain
InterPro	IPR030474	2	2	9606	9606.ENSP00000225474,9606.ENSP00000385675	CSF3,IL6	0.0006	0.012	Interleukin-6/GCSF/MGF
InterPro	IPR030473	2	2	9606	9606.ENSP00000225474,9606.ENSP00000385675	CSF3,IL6	0.0006	0.012	Interleukin-6/GCSF/MGF, conserved site
InterPro	IPR003502	2	2	9606	9606.ENSP00000263339,9606.ENSP00000263341	IL1A,IL1B	0.0006	0.012	Interleukin-1 propeptide
InterPro	IPR000538	3	14	9606	9606.ENSP00000243347,9606.ENSP00000352606,9606.ENSP00000398632	TNFAIP6,HAPLN3,CD44	0.00062	0.012	Link domain
InterPro	IPR016186	6	100	9606	9606.ENSP00000243347,9606.ENSP00000246006,9606.ENSP00000299663,9606.ENSP00000331736,9606.ENSP00000352606,9606.ENSP00000398632	TNFAIP6,CD93,CLEC4E,SELE,HAPLN3,CD44	0.00072	0.0128	C-type lectin-like/link domain superfamily
InterPro	IPR040757	2	3	9606	9606.ENSP00000278590,9606.ENSP00000362179	ZC3H12C,ZC3H12A	0.00099	0.0172	Endoribonuclease Regnase 1/ZC3H12, C-terminal domain
InterPro	IPR031964	2	3	9606	9606.ENSP00000263642,9606.ENSP00000369213	IFIH1,DDX58	0.00099	0.0172	Caspase recruitment domain
InterPro	IPR016187	6	108	9606	9606.ENSP00000243347,9606.ENSP00000246006,9606.ENSP00000299663,9606.ENSP00000331736,9606.ENSP00000352606,9606.ENSP00000398632	TNFAIP6,CD93,CLEC4E,SELE,HAPLN3,CD44	0.001	0.0172	C-type lectin fold
InterPro	IPR040546	2	4	9606	9606.ENSP00000278590,9606.ENSP00000362179	ZC3H12C,ZC3H12A	0.0015	0.0236	Rege-1, UBA-like domain
InterPro	IPR000580	2	4	9606	9606.ENSP00000361458,9606.ENSP00000397435	TSC22D3,TSC22D1	0.0015	0.0236	TSC-22 / Dip / Bun
InterPro	IPR001134	3	22	9606	9606.ENSP00000245907,9606.ENSP00000287814,9606.ENSP00000340998	C3,TIMP4,NTN4	0.002	0.0299	Netrin domain
InterPro	IPR008993	3	24	9606	9606.ENSP00000245907,9606.ENSP00000287814,9606.ENSP00000340998	C3,TIMP4,NTN4	0.0025	0.0366	Tissue inhibitor of metalloproteinases-like, OB-fold
InterPro	IPR006935	2	6	9606	9606.ENSP00000251642,9606.ENSP00000263642	DHX58,IFIH1	0.0027	0.0394	Helicase/UvrB, N-terminal
InterPro	IPR003987	2	6	9606	9606.ENSP00000264832,9606.ENSP00000294728	ICAM1,VCAM1	0.0027	0.0394	Intercellular adhesion molecule/vascular cell adhesion molecule, N-terminal
InterPro	IPR039809	3	26	9606	9606.ENSP00000006053,9606.ENSP00000225831,9606.ENSP00000351671	CX3CL1,CCL2,CCL20	0.003	0.0421	Chemokine beta/gamma/delta
InterPro	IPR021869	2	7	9606	9606.ENSP00000278590,9606.ENSP00000362179	ZC3H12C,ZC3H12A	0.0035	0.0471	Ribonuclease Zc3h12a-like, NYN domain
KEGG	hsa04668	18	108	9606	9606.ENSP00000006053,9606.ENSP00000216797,9606.ENSP00000225831,9606.ENSP00000226574,9606.ENSP00000254958,9606.ENSP00000263341,9606.ENSP00000263464,9606.ENSP00000264832,9606.ENSP00000294728,9606.ENSP00000296026,9606.ENSP00000296027,9606.ENSP00000331736,9606.ENSP00000351671,9606.ENSP00000362994,9606.ENSP00000379110,9606.ENSP00000385675,9606.ENSP00000427279,9606.ENSP00000481570	CX3CL1,NFKBIA,CCL2,NFKB1,JAG1,IL1B,BIRC3,ICAM1,VCAM1,CXCL3,CXCL5,SELE,CCL20,TRAF1,CXCL1,IL6,CXCL2,TNFAIP3	5.62e-16	1.16e-13	TNF signaling pathway
KEGG	hsa04621	18	166	9606	9606.ENSP00000216797,9606.ENSP00000220751,9606.ENSP00000222553,9606.ENSP00000225831,9606.ENSP00000226574,9606.ENSP00000263341,9606.ENSP00000263464,9606.ENSP00000296026,9606.ENSP00000330696,9606.ENSP00000359488,9606.ENSP00000359490,9606.ENSP00000359497,9606.ENSP00000359504,9606.ENSP00000359512,9606.ENSP00000379110,9606.ENSP00000385675,9606.ENSP00000427279,9606.ENSP00000481570	NFKBIA,RIPK2,NAMPT,CCL2,NFKB1,IL1B,BIRC3,CXCL3,P2RX7,GBP5,GBP4,GBP2,GBP1,GBP3,CXCL1,IL6,CXCL2,TNFAIP3	4.67e-13	4.81e-11	NOD-like receptor signaling pathway
KEGG	hsa04060	21	263	9606	9606.ENSP00000006053,9606.ENSP00000225474,9606.ENSP00000225831,9606.ENSP00000226317,9606.ENSP00000228280,9606.ENSP00000228534,9606.ENSP00000241261,9606.ENSP00000242208,9606.ENSP00000263339,9606.ENSP00000263341,9606.ENSP00000263923,9606.ENSP00000296026,9606.ENSP00000296027,9606.ENSP00000296861,9606.ENSP00000351671,9606.ENSP00000365048,9606.ENSP00000375795,9606.ENSP00000379110,9606.ENSP00000385675,…	CX3CL1,CSF3,CCL2,CXCL6,KITLG,IL23A,TNFSF10,INHBA,IL1A,IL1B,KDR,CXCL3,CXCL5,TNFRSF21,CCL20,TNFSF13B,IL24,CXCL1,IL6,PDGFC,CXCL2	1.21e-12	8.31e-11	Cytokine-cytokine receptor interaction
KEGG	hsa04064	14	93	9606	9606.ENSP00000216797,9606.ENSP00000221452,9606.ENSP00000226574,9606.ENSP00000263341,9606.ENSP00000263464,9606.ENSP00000264832,9606.ENSP00000294728,9606.ENSP00000358983,9606.ENSP00000361850,9606.ENSP00000362994,9606.ENSP00000365048,9606.ENSP00000369213,9606.ENSP00000427279,9606.ENSP00000481570	NFKBIA,RELB,NFKB1,IL1B,BIRC3,ICAM1,VCAM1,NFKB2,PLAU,TRAF1,TNFSF13B,DDX58,CXCL2,TNFAIP3	3.72e-12	1.92e-10	NF-kappa B signaling pathway
KEGG	hsa04657	13	92	9606	9606.ENSP00000216797,9606.ENSP00000225474,9606.ENSP00000225831,9606.ENSP00000226317,9606.ENSP00000226574,9606.ENSP00000263341,9606.ENSP00000296026,9606.ENSP00000296027,9606.ENSP00000351671,9606.ENSP00000379110,9606.ENSP00000385675,9606.ENSP00000427279,9606.ENSP00000481570	NFKBIA,CSF3,CCL2,CXCL6,NFKB1,IL1B,CXCL3,CXCL5,CCL20,CXCL1,IL6,CXCL2,TNFAIP3	4.57e-11	1.88e-09	IL-17 signaling pathway
KEGG	hsa05323	12	84	9606	9606.ENSP00000225831,9606.ENSP00000226317,9606.ENSP00000228534,9606.ENSP00000260010,9606.ENSP00000263339,9606.ENSP00000263341,9606.ENSP00000264832,9606.ENSP00000296027,9606.ENSP00000351671,9606.ENSP00000365048,9606.ENSP00000379110,9606.ENSP00000385675	CCL2,CXCL6,IL23A,TLR2,IL1A,IL1B,ICAM1,CXCL5,CCL20,TNFSF13B,CXCL1,IL6	2.32e-10	7.97e-09	Rheumatoid arthritis
KEGG	hsa05134	10	54	9606	9606.ENSP00000216797,9606.ENSP00000226574,9606.ENSP00000245907,9606.ENSP00000260010,9606.ENSP00000263341,9606.ENSP00000296026,9606.ENSP00000358983,9606.ENSP00000379110,9606.ENSP00000385675,9606.ENSP00000427279	NFKBIA,NFKB1,C3,TLR2,IL1B,CXCL3,NFKB2,CXCL1,IL6,CXCL2	8.06e-10	2.37e-08	Legionellosis
KEGG	hsa05144	9	47	9606	9606.ENSP00000225474,9606.ENSP00000225831,9606.ENSP00000260010,9606.ENSP00000260356,9606.ENSP00000263341,9606.ENSP00000264832,9606.ENSP00000294728,9606.ENSP00000331736,9606.ENSP00000385675	CSF3,CCL2,TLR2,THBS1,IL1B,ICAM1,VCAM1,SELE,IL6	4.47e-09	1.15e-07	Malaria
KEGG	hsa05133	10	74	9606	9606.ENSP00000226317,9606.ENSP00000226574,9606.ENSP00000228534,9606.ENSP00000245414,9606.ENSP00000245907,9606.ENSP00000263339,9606.ENSP00000263341,9606.ENSP00000296027,9606.ENSP00000385675,9606.ENSP00000438615	CXCL6,NFKB1,IL23A,IRF1,C3,IL1A,IL1B,CXCL5,IL6,C1R	1.23e-08	2.82e-07	Pertussis
KEGG	hsa05162	11	133	9606	9606.ENSP00000216797,9606.ENSP00000226574,9606.ENSP00000241261,9606.ENSP00000260010,9606.ENSP00000263339,9606.ENSP00000263341,9606.ENSP00000263642,9606.ENSP00000369213,9606.ENSP00000385675,9606.ENSP00000391676,9606.ENSP00000481570	NFKBIA,NFKB1,TNFSF10,TLR2,IL1A,IL1B,IFIH1,DDX58,IL6,JAK3,TNFAIP3	2.38e-07	4.91e-06	Measles
KEGG	hsa05200	19	515	9606	9606.ENSP00000005257,9606.ENSP00000216797,9606.ENSP00000226574,9606.ENSP00000228280,9606.ENSP00000228534,9606.ENSP00000254958,9606.ENSP00000263464,9606.ENSP00000264144,9606.ENSP00000296575,9606.ENSP00000296585,9606.ENSP00000311697,9606.ENSP00000338157,9606.ENSP00000355249,9606.ENSP00000358983,9606.ENSP00000362994,9606.ENSP00000376436,9606.ENSP00000376943,9606.ENSP00000385675,9606.ENSP00000391676	RALA,NFKBIA,NFKB1,KITLG,IL23A,JAG1,BIRC3,LAMC2,HHIP,ITGA2,FGF5,ZBTB16,E2F2,NFKB2,TRAF1,ETS1,BCL2L11,IL6,JAK3	2.07e-06	3.87e-05	Pathways in cancer
KEGG	hsa05152	11	172	9606	9606.ENSP00000220751,9606.ENSP00000226574,9606.ENSP00000228534,9606.ENSP00000245907,9606.ENSP00000256458,9606.ENSP00000260010,9606.ENSP00000263339,9606.ENSP00000263341,9606.ENSP00000299663,9606.ENSP00000357981,9606.ENSP00000385675	RIPK2,NFKB1,IL23A,C3,IRAK2,TLR2,IL1A,IL1B,CLEC4E,CTSS,IL6	2.58e-06	4.42e-05	Tuberculosis
KEGG	hsa04010	14	293	9606	9606.ENSP00000221452,9606.ENSP00000226574,9606.ENSP00000228280,9606.ENSP00000240100,9606.ENSP00000263339,9606.ENSP00000263341,9606.ENSP00000263923,9606.ENSP00000265080,9606.ENSP00000311697,9606.ENSP00000314897,9606.ENSP00000353362,9606.ENSP00000358983,9606.ENSP00000422464,9606.ENSP00000472546	RELB,NFKB1,KITLG,DUSP4,IL1A,IL1B,KDR,RASGRF2,FGF5,ANGPT2,CACNA1A,NFKB2,PDGFC,PLA2G4C	2.96e-06	4.69e-05	MAPK signaling pathway
KEGG	hsa04062	11	181	9606	9606.ENSP00000006053,9606.ENSP00000216797,9606.ENSP00000225831,9606.ENSP00000226317,9606.ENSP00000226574,9606.ENSP00000296026,9606.ENSP00000296027,9606.ENSP00000351671,9606.ENSP00000379110,9606.ENSP00000391676,9606.ENSP00000427279	CX3CL1,NFKBIA,CCL2,CXCL6,NFKB1,CXCL3,CXCL5,CCL20,CXCL1,JAK3,CXCL2	4.1e-06	6.03e-05	Chemokine signaling pathway
KEGG	hsa04014	12	228	9606	9606.ENSP00000005257,9606.ENSP00000226574,9606.ENSP00000228280,9606.ENSP00000263923,9606.ENSP00000265080,9606.ENSP00000273371,9606.ENSP00000311697,9606.ENSP00000314897,9606.ENSP00000343656,9606.ENSP00000376436,9606.ENSP00000422464,9606.ENSP00000472546	RALA,NFKB1,KITLG,KDR,RASGRF2,PLA1A,FGF5,ANGPT2,RAPGEF5,ETS1,PDGFC,PLA2G4C	6.06e-06	8.33e-05	Ras signaling pathway
KEGG	hsa05169	11	194	9606	9606.ENSP00000216797,9606.ENSP00000221452,9606.ENSP00000226574,9606.ENSP00000264832,9606.ENSP00000275015,9606.ENSP00000358983,9606.ENSP00000362994,9606.ENSP00000369213,9606.ENSP00000391676,9606.ENSP00000398632,9606.ENSP00000481570	NFKBIA,RELB,NFKB1,ICAM1,NFKBIE,NFKB2,TRAF1,DDX58,JAK3,CD44,TNFAIP3	7.66e-06	9.86e-05	Epstein-Barr virus infection
KEGG	hsa04933	8	98	9606	9606.ENSP00000225831,9606.ENSP00000226574,9606.ENSP00000263339,9606.ENSP00000263341,9606.ENSP00000264832,9606.ENSP00000294728,9606.ENSP00000331736,9606.ENSP00000385675	CCL2,NFKB1,IL1A,IL1B,ICAM1,VCAM1,SELE,IL6	1.19e-05	0.00014	AGE-RAGE signaling pathway in diabetic complications
KEGG	hsa05418	9	133	9606	9606.ENSP00000220809,9606.ENSP00000225831,9606.ENSP00000226574,9606.ENSP00000263339,9606.ENSP00000263341,9606.ENSP00000263923,9606.ENSP00000264832,9606.ENSP00000294728,9606.ENSP00000331736	PLAT,CCL2,NFKB1,IL1A,IL1B,KDR,ICAM1,VCAM1,SELE	1.4e-05	0.00015	Fluid shear stress and atherosclerosis
KEGG	hsa05202	10	169	9606	9606.ENSP00000220809,9606.ENSP00000226574,9606.ENSP00000263464,9606.ENSP00000325663,9606.ENSP00000338157,9606.ENSP00000341843,9606.ENSP00000361850,9606.ENSP00000362994,9606.ENSP00000385675,9606.ENSP00000437621	PLAT,NFKB1,BIRC3,NFKBIZ,ZBTB16,ETV7,PLAU,TRAF1,IL6,HMGA2	1.41e-05	0.00015	Transcriptional misregulation in cancer
KEGG	hsa05164	10	168	9606	9606.ENSP00000216797,9606.ENSP00000225831,9606.ENSP00000226574,9606.ENSP00000241261,9606.ENSP00000263339,9606.ENSP00000263341,9606.ENSP00000263642,9606.ENSP00000264832,9606.ENSP00000369213,9606.ENSP00000385675	NFKBIA,CCL2,NFKB1,TNFSF10,IL1A,IL1B,IFIH1,ICAM1,DDX58,IL6	1.34e-05	0.00015	Influenza A
KEGG	hsa04151	14	348	9606	9606.ENSP00000225474,9606.ENSP00000226574,9606.ENSP00000228280,9606.ENSP00000260010,9606.ENSP00000260356,9606.ENSP00000263923,9606.ENSP00000264144,9606.ENSP00000296585,9606.ENSP00000311697,9606.ENSP00000314897,9606.ENSP00000376943,9606.ENSP00000385675,9606.ENSP00000391676,9606.ENSP00000422464	CSF3,NFKB1,KITLG,TLR2,THBS1,KDR,LAMC2,ITGA2,FGF5,ANGPT2,BCL2L11,IL6,JAK3,PDGFC	1.92e-05	0.00019	PI3K-Akt signaling pathway
KEGG	hsa05168	10	181	9606	9606.ENSP00000216797,9606.ENSP00000225831,9606.ENSP00000226574,9606.ENSP00000245907,9606.ENSP00000260010,9606.ENSP00000263341,9606.ENSP00000263642,9606.ENSP00000362994,9606.ENSP00000369213,9606.ENSP00000385675	NFKBIA,CCL2,NFKB1,C3,TLR2,IL1B,IFIH1,TRAF1,DDX58,IL6	2.47e-05	0.00023	Herpes simplex infection
KEGG	hsa05167	10	183	9606	9606.ENSP00000216797,9606.ENSP00000226574,9606.ENSP00000245907,9606.ENSP00000264832,9606.ENSP00000296026,9606.ENSP00000314897,9606.ENSP00000355249,9606.ENSP00000379110,9606.ENSP00000385675,9606.ENSP00000427279	NFKBIA,NFKB1,C3,ICAM1,CXCL3,ANGPT2,E2F2,CXCL1,IL6,CXCL2	2.7e-05	0.00024	Kaposi's sarcoma-associated herpesvirus infection
KEGG	hsa05132	7	84	9606	9606.ENSP00000226574,9606.ENSP00000263339,9606.ENSP00000263341,9606.ENSP00000296026,9606.ENSP00000379110,9606.ENSP00000385675,9606.ENSP00000427279	NFKB1,IL1A,IL1B,CXCL3,CXCL1,IL6,CXCL2	3.74e-05	0.00032	Salmonella infection
KEGG	hsa05143	5	34	9606	9606.ENSP00000263341,9606.ENSP00000264832,9606.ENSP00000294728,9606.ENSP00000331736,9606.ENSP00000385675	IL1B,ICAM1,VCAM1,SELE,IL6	4.29e-05	0.00035	African trypanosomiasis
KEGG	hsa05321	6	62	9606	9606.ENSP00000226574,9606.ENSP00000228534,9606.ENSP00000260010,9606.ENSP00000263339,9606.ENSP00000263341,9606.ENSP00000385675	NFKB1,IL23A,TLR2,IL1A,IL1B,IL6	6.29e-05	0.00049	Inflammatory bowel disease (IBD)
KEGG	hsa05222	7	92	9606	9606.ENSP00000216797,9606.ENSP00000226574,9606.ENSP00000263464,9606.ENSP00000264144,9606.ENSP00000296585,9606.ENSP00000355249,9606.ENSP00000362994	NFKBIA,NFKB1,BIRC3,LAMC2,ITGA2,E2F2,TRAF1	6.43e-05	0.00049	Small cell lung cancer
KEGG	hsa04015	10	203	9606	9606.ENSP00000005257,9606.ENSP00000228280,9606.ENSP00000260356,9606.ENSP00000263923,9606.ENSP00000311697,9606.ENSP00000314897,9606.ENSP00000343656,9606.ENSP00000365280,9606.ENSP00000404179,9606.ENSP00000422464	RALA,KITLG,THBS1,KDR,FGF5,ANGPT2,RAPGEF5,ID1,DOCK4,PDGFC	6.23e-05	0.00049	Rap1 signaling pathway
KEGG	hsa05166	11	250	9606	9606.ENSP00000216797,9606.ENSP00000221452,9606.ENSP00000226574,9606.ENSP00000264832,9606.ENSP00000294728,9606.ENSP00000355249,9606.ENSP00000358983,9606.ENSP00000372170,9606.ENSP00000376436,9606.ENSP00000385675,9606.ENSP00000391676	NFKBIA,RELB,NFKB1,ICAM1,VCAM1,E2F2,NFKB2,MSX1,ETS1,IL6,JAK3	7.11e-05	0.00051	HTLV-I infection
KEGG	hsa04640	7	94	9606	9606.ENSP00000225474,9606.ENSP00000228280,9606.ENSP00000263339,9606.ENSP00000263341,9606.ENSP00000296585,9606.ENSP00000385675,9606.ENSP00000398632	CSF3,KITLG,IL1A,IL1B,ITGA2,IL6,CD44	7.3e-05	0.00051	Hematopoietic cell lineage
KEGG	hsa05142	7	101	9606	9606.ENSP00000216797,9606.ENSP00000225831,9606.ENSP00000226574,9606.ENSP00000245907,9606.ENSP00000260010,9606.ENSP00000263341,9606.ENSP00000385675	NFKBIA,CCL2,NFKB1,C3,TLR2,IL1B,IL6	0.00011	0.00074	Chagas disease (American trypanosomiasis)
KEGG	hsa05140	6	70	9606	9606.ENSP00000216797,9606.ENSP00000226574,9606.ENSP00000245907,9606.ENSP00000260010,9606.ENSP00000263339,9606.ENSP00000263341	NFKBIA,NFKB1,C3,TLR2,IL1A,IL1B	0.00012	0.00076	Leishmaniasis
KEGG	hsa04659	7	102	9606	9606.ENSP00000216797,9606.ENSP00000226574,9606.ENSP00000228534,9606.ENSP00000263341,9606.ENSP00000275015,9606.ENSP00000385675,9606.ENSP00000391676	NFKBIA,NFKB1,IL23A,IL1B,NFKBIE,IL6,JAK3	0.00012	0.00076	Th17 cell differentiation
KEGG	hsa04622	6	70	9606	9606.ENSP00000216797,9606.ENSP00000226574,9606.ENSP00000251642,9606.ENSP00000263642,9606.ENSP00000369213,9606.ENSP00000392025	NFKBIA,NFKB1,DHX58,IFIH1,DDX58,CYLD	0.00012	0.00076	RIG-I-like receptor signaling pathway
KEGG	hsa05206	8	149	9606	9606.ENSP00000226574,9606.ENSP00000260356,9606.ENSP00000346697,9606.ENSP00000355249,9606.ENSP00000361850,9606.ENSP00000376943,9606.ENSP00000398632,9606.ENSP00000437621	NFKB1,THBS1,BMF,E2F2,PLAU,BCL2L11,CD44,HMGA2	0.00019	0.0011	MicroRNAs in cancer
KEGG	hsa00330	5	48	9606	9606.ENSP00000226299,9606.ENSP00000234111,9606.ENSP00000325548,9606.ENSP00000368572,9606.ENSP00000478305	LAP3,ODC1,CNDP2,SAT1,SMOX	0.00019	0.0011	Arginine and proline metabolism
KEGG	hsa04217	8	155	9606	9606.ENSP00000241261,9606.ENSP00000263339,9606.ENSP00000263341,9606.ENSP00000263464,9606.ENSP00000391676,9606.ENSP00000392025,9606.ENSP00000472546,9606.ENSP00000481570	TNFSF10,IL1A,IL1B,BIRC3,JAK3,CYLD,PLA2G4C,TNFAIP3	0.00025	0.0014	Necroptosis
KEGG	hsa04380	7	124	9606	9606.ENSP00000216797,9606.ENSP00000221452,9606.ENSP00000226574,9606.ENSP00000263339,9606.ENSP00000263341,9606.ENSP00000358983,9606.ENSP00000392025	NFKBIA,RELB,NFKB1,IL1A,IL1B,NFKB2,CYLD	0.00037	0.002	Osteoclast differentiation
KEGG	hsa05160	7	131	9606	9606.ENSP00000216797,9606.ENSP00000226574,9606.ENSP00000245414,9606.ENSP00000295522,9606.ENSP00000369213,9606.ENSP00000382090,9606.ENSP00000454071	NFKBIA,NFKB1,IRF1,CLDN1,DDX58,CLDN14,LDLR	0.0005	0.0027	Hepatitis C
KEGG	hsa05146	6	94	9606	9606.ENSP00000226574,9606.ENSP00000260010,9606.ENSP00000263341,9606.ENSP00000264144,9606.ENSP00000379110,9606.ENSP00000385675	NFKB1,TLR2,IL1B,LAMC2,CXCL1,IL6	0.00053	0.0027	Amoebiasis
KEGG	hsa05215	6	97	9606	9606.ENSP00000216797,9606.ENSP00000220809,9606.ENSP00000226574,9606.ENSP00000355249,9606.ENSP00000361850,9606.ENSP00000422464	NFKBIA,PLAT,NFKB1,E2F2,PLAU,PDGFC	0.00061	0.0029	Prostate cancer
KEGG	hsa04623	5	62	9606	9606.ENSP00000216797,9606.ENSP00000226574,9606.ENSP00000263341,9606.ENSP00000369213,9606.ENSP00000385675	NFKBIA,NFKB1,IL1B,DDX58,IL6	0.00057	0.0029	Cytosolic DNA-sensing pathway
KEGG	hsa04210	7	135	9606	9606.ENSP00000216797,9606.ENSP00000226574,9606.ENSP00000241261,9606.ENSP00000263464,9606.ENSP00000357981,9606.ENSP00000362994,9606.ENSP00000376943	NFKBIA,NFKB1,TNFSF10,BIRC3,CTSS,TRAF1,BCL2L11	0.0006	0.0029	Apoptosis
KEGG	hsa05161	7	142	9606	9606.ENSP00000216797,9606.ENSP00000226574,9606.ENSP00000260010,9606.ENSP00000263642,9606.ENSP00000355249,9606.ENSP00000369213,9606.ENSP00000385675	NFKBIA,NFKB1,TLR2,IFIH1,E2F2,DDX58,IL6	0.00079	0.0037	Hepatitis B
KEGG	hsa05145	6	109	9606	9606.ENSP00000216797,9606.ENSP00000226574,9606.ENSP00000260010,9606.ENSP00000263464,9606.ENSP00000264144,9606.ENSP00000454071	NFKBIA,NFKB1,TLR2,BIRC3,LAMC2,LDLR	0.0011	0.005	Toxoplasmosis
KEGG	hsa04610	5	78	9606	9606.ENSP00000220809,9606.ENSP00000245907,9606.ENSP00000339328,9606.ENSP00000361850,9606.ENSP00000438615	PLAT,C3,PLAUR,PLAU,C1R	0.0015	0.0068	Complement and coagulation cascades
KEGG	hsa04350	5	83	9606	9606.ENSP00000242208,9606.ENSP00000256759,9606.ENSP00000260356,9606.ENSP00000288840,9606.ENSP00000365280	INHBA,FST,THBS1,SMAD6,ID1	0.002	0.0086	TGF-beta signaling pathway
KEGG	hsa04658	5	88	9606	9606.ENSP00000216797,9606.ENSP00000226574,9606.ENSP00000254958,9606.ENSP00000275015,9606.ENSP00000391676	NFKBIA,NFKB1,JAG1,NFKBIE,JAK3	0.0025	0.0107	Th1 and Th2 cell differentiation
KEGG	hsa05203	7	183	9606	9606.ENSP00000216797,9606.ENSP00000226574,9606.ENSP00000245907,9606.ENSP00000358983,9606.ENSP00000362994,9606.ENSP00000391676,9606.ENSP00000408617	NFKBIA,NFKB1,C3,NFKB2,TRAF1,JAK3,HDAC9	0.0032	0.0134	Viral carcinogenesis
KEGG	hsa04145	6	145	9606	9606.ENSP00000245907,9606.ENSP00000260010,9606.ENSP00000260356,9606.ENSP00000296585,9606.ENSP00000357981,9606.ENSP00000438615	C3,TLR2,THBS1,ITGA2,CTSS,C1R	0.0043	0.0177	Phagosome
KEGG	hsa05205	7	195	9606	9606.ENSP00000260010,9606.ENSP00000260356,9606.ENSP00000263923,9606.ENSP00000296585,9606.ENSP00000339328,9606.ENSP00000361850,9606.ENSP00000398632	TLR2,THBS1,KDR,ITGA2,PLAUR,PLAU,CD44	0.0045	0.018	Proteoglycans in cancer
KEGG	hsa05131	4	63	9606	9606.ENSP00000216797,9606.ENSP00000220751,9606.ENSP00000226574,9606.ENSP00000398632	NFKBIA,RIPK2,NFKB1,CD44	0.0047	0.0181	Shigellosis
KEGG	hsa04620	5	102	9606	9606.ENSP00000216797,9606.ENSP00000226574,9606.ENSP00000260010,9606.ENSP00000263341,9606.ENSP00000385675	NFKBIA,NFKB1,TLR2,IL1B,IL6	0.0046	0.0181	Toll-like receptor signaling pathway
KEGG	hsa01523	3	31	9606	9606.ENSP00000226574,9606.ENSP00000263341,9606.ENSP00000385675	NFKB1,IL1B,IL6	0.0048	0.0182	Antifolate resistance
KEGG	hsa05020	3	33	9606	9606.ENSP00000263339,9606.ENSP00000263341,9606.ENSP00000385675	IL1A,IL1B,IL6	0.0056	0.0211	Prion diseases
KEGG	hsa05332	3	36	9606	9606.ENSP00000263339,9606.ENSP00000263341,9606.ENSP00000385675	IL1A,IL1B,IL6	0.007	0.0259	Graft-versus-host disease
KEGG	hsa04722	5	116	9606	9606.ENSP00000216797,9606.ENSP00000220751,9606.ENSP00000226574,9606.ENSP00000256458,9606.ENSP00000275015	NFKBIA,RIPK2,NFKB1,IRAK2,NFKBIE	0.0076	0.0276	Neurotrophin signaling pathway
KEGG	hsa01521	4	78	9606	9606.ENSP00000263923,9606.ENSP00000376943,9606.ENSP00000385675,9606.ENSP00000422464	KDR,BCL2L11,IL6,PDGFC	0.0095	0.0336	EGFR tyrosine kinase inhibitor resistance
KEGG	hsa05219	3	41	9606	9606.ENSP00000260356,9606.ENSP00000355249,9606.ENSP00000379038	THBS1,E2F2,TYMP	0.0098	0.0343	Bladder cancer
KEGG	hsa04512	4	81	9606	9606.ENSP00000260356,9606.ENSP00000264144,9606.ENSP00000296585,9606.ENSP00000398632	THBS1,LAMC2,ITGA2,CD44	0.0107	0.0368	ECM-receptor interaction
Keyword	KW-0964	57	1814	9606	9606.ENSP00000006053,9606.ENSP00000161559,9606.ENSP00000220809,9606.ENSP00000222543,9606.ENSP00000222553,9606.ENSP00000225474,9606.ENSP00000225831,9606.ENSP00000226317,9606.ENSP00000228280,9606.ENSP00000228534,9606.ENSP00000241261,9606.ENSP00000242208,9606.ENSP00000245907,9606.ENSP00000252809,9606.ENSP00000256759,9606.ENSP00000258613,9606.ENSP00000259206,9606.ENSP00000260356,9606.ENSP00000261292,…	CX3CL1,CEACAM1,PLAT,TFPI2,NAMPT,CSF3,CCL2,CXCL6,KITLG,IL23A,TNFSF10,INHBA,C3,GDF15,FST,THSD1,IL1RN,THBS1,LIPG,IL1A,IL1B,KDR,LAMC2,STC2,SEMA3C,SEMA3A,PLA1A,SEMA3D,ABI3BP,TIMP4,PTX3,CXCL3,CXCL5,HHIP,FGF5,ANGPT2,PLAUR,NTN4,CCL20,HAPLN3,GBP1,PLAU,ANGPTL2,TNFSF13B,B4GALT1,ADAMTS6,ESM1,IL24,CXCL1,IL18BP,IL6,SERPINE2,PDGFC,CXCL2,SAMD1,SAA2,C1R	1.02e-14	2.66e-12	Secreted
Keyword	KW-0202	18	185	9606	9606.ENSP00000006053,9606.ENSP00000222553,9606.ENSP00000225474,9606.ENSP00000225831,9606.ENSP00000226317,9606.ENSP00000228534,9606.ENSP00000241261,9606.ENSP00000252809,9606.ENSP00000263339,9606.ENSP00000263341,9606.ENSP00000296026,9606.ENSP00000296027,9606.ENSP00000351671,9606.ENSP00000365048,9606.ENSP00000375795,9606.ENSP00000379110,9606.ENSP00000385675,9606.ENSP00000427279	CX3CL1,NAMPT,CSF3,CCL2,CXCL6,IL23A,TNFSF10,GDF15,IL1A,IL1B,CXCL3,CXCL5,CCL20,TNFSF13B,IL24,CXCL1,IL6,CXCL2	2.52e-12	3.3e-10	Cytokine
Keyword	KW-0732	68	3236	9606	9606.ENSP00000006053,9606.ENSP00000161559,9606.ENSP00000220809,9606.ENSP00000222543,9606.ENSP00000225474,9606.ENSP00000225831,9606.ENSP00000226317,9606.ENSP00000228280,9606.ENSP00000228534,9606.ENSP00000242208,9606.ENSP00000243347,9606.ENSP00000245907,9606.ENSP00000246006,9606.ENSP00000252809,9606.ENSP00000254958,9606.ENSP00000256759,9606.ENSP00000258613,9606.ENSP00000259206,9606.ENSP00000260010,…	CX3CL1,CEACAM1,PLAT,TFPI2,CSF3,CCL2,CXCL6,KITLG,IL23A,INHBA,TNFAIP6,C3,CD93,GDF15,JAG1,FST,THSD1,IL1RN,TLR2,THBS1,LIPG,KDR,LAMC2,ICAM1,NPR3,STC2,SEMA3C,SEMA3A,LAMP3,PLA1A,SEMA3D,ABI3BP,TIMP4,VCAM1,PTX3,CXCL3,CXCL5,HHIP,ITGA2,TNFRSF21,FGF5,ANGPT2,SELE,DSE,PTPRB,PLAUR,NTN4,CCL20,HAPLN3,SEMA6C,CTSS,PLAU,ANGPTL2,ADAMTS6,ESM1,IL24,CXCL1,IL18BP,IL6,CD44,SERPINE2,PDGFC,CXCL2,SAA2,C1R,ADAM8,LDLR,IL4I1	1.41e-09	1.23e-07	Signal
Keyword	KW-0395	14	156	9606	9606.ENSP00000225831,9606.ENSP00000228534,9606.ENSP00000245907,9606.ENSP00000260010,9606.ENSP00000263339,9606.ENSP00000263341,9606.ENSP00000296026,9606.ENSP00000317891,9606.ENSP00000351671,9606.ENSP00000359488,9606.ENSP00000362179,9606.ENSP00000379110,9606.ENSP00000427279,9606.ENSP00000481570	CCL2,IL23A,C3,TLR2,IL1A,IL1B,CXCL3,TNIP1,CCL20,GBP5,ZC3H12A,CXCL1,CXCL2,TNFAIP3	1.96e-09	1.28e-07	Inflammatory response
Keyword	KW-1015	68	3284	9606	9606.ENSP00000006053,9606.ENSP00000161559,9606.ENSP00000220809,9606.ENSP00000222543,9606.ENSP00000225474,9606.ENSP00000225831,9606.ENSP00000226317,9606.ENSP00000228280,9606.ENSP00000228534,9606.ENSP00000242208,9606.ENSP00000243347,9606.ENSP00000245907,9606.ENSP00000246006,9606.ENSP00000252809,9606.ENSP00000254958,9606.ENSP00000256759,9606.ENSP00000258613,9606.ENSP00000259206,9606.ENSP00000260010,…	CX3CL1,CEACAM1,PLAT,TFPI2,CSF3,CCL2,CXCL6,KITLG,IL23A,INHBA,TNFAIP6,C3,CD93,GDF15,JAG1,FST,THSD1,IL1RN,TLR2,THBS1,LIPG,KDR,LAMC2,ICAM1,NPR3,STC2,SEMA3C,SEMA3A,LAMP3,PLA1A,SEMA3D,TIMP4,VCAM1,CLDN1,PTX3,CXCL3,CXCL5,HHIP,ITGA2,TNFRSF21,CLEC4E,ANGPT2,P2RX7,SELE,PLAUR,NTN4,GALNT15,CCL20,HAPLN3,CACNA1A,SEMA6C,CTSS,PLAU,ANGPTL2,TNFSF13B,B4GALT1,ADAMTS6,ESM1,CXCL1,IL18BP,IL6,CD44,PDGFC,CXCL2,C1R,ADAM8,LD…	2.62e-09	1.37e-07	Disulfide bond
Keyword	KW-0391	23	512	9606	9606.ENSP00000220751,9606.ENSP00000228534,9606.ENSP00000245414,9606.ENSP00000245907,9606.ENSP00000251642,9606.ENSP00000257570,9606.ENSP00000260010,9606.ENSP00000263642,9606.ENSP00000265598,9606.ENSP00000296861,9606.ENSP00000299663,9606.ENSP00000359488,9606.ENSP00000359504,9606.ENSP00000359512,9606.ENSP00000360883,9606.ENSP00000360891,9606.ENSP00000362179,9606.ENSP00000365048,9606.ENSP00000369213,…	RIPK2,IL23A,IRF1,C3,DHX58,OASL,TLR2,IFIH1,LAMP3,TNFRSF21,CLEC4E,GBP5,GBP1,GBP3,IFIT3,IFIT2,ZC3H12A,TNFSF13B,DDX58,ETS1,JAK3,CYLD,C1R	5.1e-09	2.23e-07	Immunity
Keyword	KW-0051	12	125	9606	9606.ENSP00000228534,9606.ENSP00000245414,9606.ENSP00000251642,9606.ENSP00000257570,9606.ENSP00000263642,9606.ENSP00000359504,9606.ENSP00000359512,9606.ENSP00000360883,9606.ENSP00000360891,9606.ENSP00000362179,9606.ENSP00000369213,9606.ENSP00000369299	IL23A,IRF1,DHX58,OASL,IFIH1,GBP1,GBP3,IFIT3,IFIT2,ZC3H12A,DDX58,TRIM22	1.44e-08	5.39e-07	Antiviral defense
Keyword	KW-0399	15	309	9606	9606.ENSP00000220751,9606.ENSP00000228534,9606.ENSP00000245414,9606.ENSP00000245907,9606.ENSP00000251642,9606.ENSP00000257570,9606.ENSP00000260010,9606.ENSP00000263642,9606.ENSP00000299663,9606.ENSP00000360883,9606.ENSP00000360891,9606.ENSP00000369213,9606.ENSP00000391676,9606.ENSP00000392025,9606.ENSP00000438615	RIPK2,IL23A,IRF1,C3,DHX58,OASL,TLR2,IFIH1,CLEC4E,IFIT3,IFIT2,DDX58,JAK3,CYLD,C1R	1.08e-06	3.52e-05	Innate immunity
Keyword	KW-0325	73	4352	9606	9606.ENSP00000004531,9606.ENSP00000006053,9606.ENSP00000161559,9606.ENSP00000220809,9606.ENSP00000222543,9606.ENSP00000225474,9606.ENSP00000225831,9606.ENSP00000228280,9606.ENSP00000242208,9606.ENSP00000243347,9606.ENSP00000245907,9606.ENSP00000246006,9606.ENSP00000252809,9606.ENSP00000254958,9606.ENSP00000256759,9606.ENSP00000258613,9606.ENSP00000259206,9606.ENSP00000259874,9606.ENSP00000260010,…	SLC7A2,CX3CL1,CEACAM1,PLAT,TFPI2,CSF3,CCL2,KITLG,INHBA,TNFAIP6,C3,CD93,GDF15,JAG1,FST,THSD1,IL1RN,IER3,TLR2,THBS1,LIPG,IL1A,KDR,LAMC2,ICAM1,NPR3,STC2,SEMA3C,SEMA3A,LAMP3,PLA1A,SEMA3D,ABI3BP,SLC26A2,KCNT2,VCAM1,PTX3,HHIP,ITGA2,TNFRSF21,CLEC4E,FGF5,ANGPT2,P2RX7,SELE,DSE,PTPRB,PLAUR,NTN4,GALNT15,CACNA1A,SEMA6C,CTSS,PPAP2B,SLC2A6,PLAU,ANGPTL2,TNFSF13B,B4GALT1,ADAMTS6,ESM1,TMEM156,IL24,IL18BP,IL6,CD44…	3.06e-06	8.92e-05	Glycoprotein
Keyword	KW-0339	9	130	9606	9606.ENSP00000225474,9606.ENSP00000228280,9606.ENSP00000242208,9606.ENSP00000252809,9606.ENSP00000311697,9606.ENSP00000379038,9606.ENSP00000379110,9606.ENSP00000385675,9606.ENSP00000422464	CSF3,KITLG,INHBA,GDF15,FGF5,TYMP,CXCL1,IL6,PDGFC	1.18e-05	0.0003	Growth factor
Keyword	KW-0053	18	530	9606	9606.ENSP00000220751,9606.ENSP00000226574,9606.ENSP00000241261,9606.ENSP00000258534,9606.ENSP00000263464,9606.ENSP00000266671,9606.ENSP00000296861,9606.ENSP00000313391,9606.ENSP00000346697,9606.ENSP00000355996,9606.ENSP00000356125,9606.ENSP00000360891,9606.ENSP00000362179,9606.ENSP00000362994,9606.ENSP00000375795,9606.ENSP00000376943,9606.ENSP00000427424,9606.ENSP00000481570	RIPK2,NFKB1,TNFSF10,DRAM1,BIRC3,PHLDA1,TNFRSF21,DAB2,BMF,G0S2,NUAK2,IFIT2,ZC3H12A,TRAF1,IL24,BCL2L11,TNFAIP8,TNFAIP3	1.16e-05	0.0003	Apoptosis
Keyword	KW-0145	7	94	9606	9606.ENSP00000006053,9606.ENSP00000225831,9606.ENSP00000226317,9606.ENSP00000296026,9606.ENSP00000351671,9606.ENSP00000379038,9606.ENSP00000427279	CX3CL1,CCL2,CXCL6,CXCL3,CCL20,TYMP,CXCL2	7.3e-05	0.0016	Chemotaxis
Keyword	KW-0245	10	229	9606	9606.ENSP00000220809,9606.ENSP00000246006,9606.ENSP00000254958,9606.ENSP00000260356,9606.ENSP00000296575,9606.ENSP00000331736,9606.ENSP00000361850,9606.ENSP00000438615,9606.ENSP00000453302,9606.ENSP00000454071	PLAT,CD93,JAG1,THBS1,HHIP,SELE,PLAU,C1R,ADAM8,LDLR	0.00016	0.0032	EGF-like domain
Keyword	KW-0666	2	2	9606	9606.ENSP00000263339,9606.ENSP00000263341	IL1A,IL1B	0.0006	0.0112	Pyrogen
Keyword	KW-0621	141	11708	9606	9606.ENSP00000004531,9606.ENSP00000006053,9606.ENSP00000161559,9606.ENSP00000220751,9606.ENSP00000220809,9606.ENSP00000221452,9606.ENSP00000222543,9606.ENSP00000222553,9606.ENSP00000225474,9606.ENSP00000226574,9606.ENSP00000228280,9606.ENSP00000241261,9606.ENSP00000242208,9606.ENSP00000243347,9606.ENSP00000245185,9606.ENSP00000245907,9606.ENSP00000246006,9606.ENSP00000251642,9606.ENSP00000252809,…	SLC7A2,CX3CL1,CEACAM1,RIPK2,PLAT,RELB,TFPI2,NAMPT,CSF3,NFKB1,KITLG,TNFSF10,INHBA,TNFAIP6,MT2A,C3,CD93,DHX58,GDF15,TRIM47,JAG1,IRAK2,FST,OASL,THSD1,RTP4,IL1RN,GMPR,IER3,TLR2,THBS1,LIPG,PLEKHA4,IL1A,IL1B,BIRC3,IFIH1,KDR,LAMC2,HERC6,ICAM1,RASGRF2,SEMA3C,SEMA3A,LAMP3,JDP2,PLA1A,NFKBIE,SEMA3D,CA2,SLC26A2,SMAD6,KCNT2,VCAM1,PTX3,CXCL3,HHIP,ITGA2,RRAD,FGF5,DAB2,ANGPT2,TNIP1,SLC16A6,RHBDF2,CNDP2,NFKBIZ,P2…	0.00085	0.0149	Polymorphism
Keyword	KW-0497	4	40	9606	9606.ENSP00000263339,9606.ENSP00000263341,9606.ENSP00000311697,9606.ENSP00000422464	IL1A,IL1B,FGF5,PDGFC	0.00099	0.0162	Mitogen
Keyword	KW-0678	15	602	9606	9606.ENSP00000221452,9606.ENSP00000245414,9606.ENSP00000256495,9606.ENSP00000267569,9606.ENSP00000325663,9606.ENSP00000337889,9606.ENSP00000338157,9606.ENSP00000341843,9606.ENSP00000358983,9606.ENSP00000362179,9606.ENSP00000365280,9606.ENSP00000369299,9606.ENSP00000372170,9606.ENSP00000397435,9606.ENSP00000408617	RELB,IRF1,BHLHE40,JDP2,NFKBIZ,MXD4,ZBTB16,ETV7,NFKB2,ZC3H12A,ID1,TRIM22,MSX1,TSC22D1,HDAC9	0.0015	0.0233	Repressor
Keyword	KW-0617	2	5	9606	9606.ENSP00000220809,9606.ENSP00000361850	PLAT,PLAU	0.002	0.0298	Plasminogen activation
Keyword	KW-0358	5	87	9606	9606.ENSP00000226317,9606.ENSP00000260356,9606.ENSP00000261292,9606.ENSP00000264144,9606.ENSP00000415786	CXCL6,THBS1,LIPG,LAMC2,SERPINE2	0.0024	0.0329	Heparin-binding
Keyword	KW-0037	6	129	9606	9606.ENSP00000263923,9606.ENSP00000314897,9606.ENSP00000334928,9606.ENSP00000362179,9606.ENSP00000370812,9606.ENSP00000379038	KDR,ANGPT2,PTPRB,ZC3H12A,ESM1,TYMP	0.0025	0.0329	Angiogenesis
Keyword	KW-0378	28	1582	9606	9606.ENSP00000220809,9606.ENSP00000226299,9606.ENSP00000240100,9606.ENSP00000251642,9606.ENSP00000261292,9606.ENSP00000263642,9606.ENSP00000273371,9606.ENSP00000278590,9606.ENSP00000325548,9606.ENSP00000334928,9606.ENSP00000357981,9606.ENSP00000359488,9606.ENSP00000359490,9606.ENSP00000359497,9606.ENSP00000359504,9606.ENSP00000359512,9606.ENSP00000360296,9606.ENSP00000361850,9606.ENSP00000362179,…	PLAT,LAP3,DUSP4,DHX58,LIPG,IFIH1,PLA1A,ZC3H12C,CNDP2,PTPRB,CTSS,GBP5,GBP4,GBP2,GBP1,GBP3,PPAP2B,PLAU,ZC3H12A,DDX58,ADAMTS6,CYLD,HDAC9,GCH1,C1R,ADAM8,PLA2G4C,TNFAIP3	0.0031	0.0393	Hydrolase
Keyword	KW-0090	6	138	9606	9606.ENSP00000221452,9606.ENSP00000222553,9606.ENSP00000256495,9606.ENSP00000358983,9606.ENSP00000365280,9606.ENSP00000453076	RELB,NAMPT,BHLHE40,NFKB2,ID1,GPR176	0.0034	0.0407	Biological rhythms
Keyword	KW-0963	68	4979	9606	9606.ENSP00000216797,9606.ENSP00000220751,9606.ENSP00000221452,9606.ENSP00000222553,9606.ENSP00000226299,9606.ENSP00000226574,9606.ENSP00000228280,9606.ENSP00000245414,9606.ENSP00000251642,9606.ENSP00000254816,9606.ENSP00000256495,9606.ENSP00000257570,9606.ENSP00000259206,9606.ENSP00000260983,9606.ENSP00000263265,9606.ENSP00000263341,9606.ENSP00000263464,9606.ENSP00000263642,9606.ENSP00000263923,…	NFKBIA,RIPK2,RELB,NAMPT,LAP3,NFKB1,KITLG,IRF1,DHX58,TRIM47,BHLHE40,OASL,IL1RN,HECW2,PLEKHA4,IL1B,BIRC3,IFIH1,KDR,HERC6,RASGRF2,PHLDA1,NFKBIE,CA2,HHIP,DAB2,TNIP1,HMGCS1,CNDP2,NR4A2,WTAP,BLZF1,NFKB2,GBP5,GBP4,GBP2,GBP1,GBP3,IFIT3,IFIT2,TSC22D3,ZC3H12A,ID1,NEBL,RPGR,SAT1,DSP,DDX58,TRIM22,SDCBP2,PID1,ETS1,PSTPIP2,JAK3,CYLD,TSC22D1,KBTBD8,DOCK4,PHLDB2,GCH1,PDGFC,TNFAIP8,POU2F2,SAMD1,FRY,CNKSR3,SMOX,TN…	0.004	0.0451	Cytoplasm
NetworkNeighborAL	CL.3630	18	91	9606	9606.ENSP00000216797,9606.ENSP00000220751,9606.ENSP00000221452,9606.ENSP00000226574,9606.ENSP00000256458,9606.ENSP00000259206,9606.ENSP00000260010,9606.ENSP00000263339,9606.ENSP00000263341,9606.ENSP00000263464,9606.ENSP00000263642,9606.ENSP00000275015,9606.ENSP00000299663,9606.ENSP00000317891,9606.ENSP00000358983,9606.ENSP00000362994,9606.ENSP00000369213,9606.ENSP00000481570	NFKBIA,RIPK2,RELB,NFKB1,IRAK2,IL1RN,TLR2,IL1A,IL1B,BIRC3,IFIH1,NFKBIE,CLEC4E,TNIP1,NFKB2,TRAF1,DDX58,TNFAIP3	3.89e-17	2.55e-14	mixed, incl. I-kappaB kinase/NF-kappaB signaling, and interleukin-1-mediated signaling pathway
NetworkNeighborAL	CL.3627	19	128	9606	9606.ENSP00000216797,9606.ENSP00000220751,9606.ENSP00000221452,9606.ENSP00000226574,9606.ENSP00000256458,9606.ENSP00000259206,9606.ENSP00000260010,9606.ENSP00000263339,9606.ENSP00000263341,9606.ENSP00000263464,9606.ENSP00000263642,9606.ENSP00000275015,9606.ENSP00000299663,9606.ENSP00000317891,9606.ENSP00000358983,9606.ENSP00000362994,9606.ENSP00000369213,9606.ENSP00000384212,9606.ENSP00000481570	NFKBIA,RIPK2,RELB,NFKB1,IRAK2,IL1RN,TLR2,IL1A,IL1B,BIRC3,IFIH1,NFKBIE,CLEC4E,TNIP1,NFKB2,TRAF1,DDX58,IL18BP,TNFAIP3	5.71e-16	1.87e-13	NF-kappa B signaling pathway, and Inflammatory response
NetworkNeighborAL	CL.3631	16	86	9606	9606.ENSP00000216797,9606.ENSP00000220751,9606.ENSP00000221452,9606.ENSP00000226574,9606.ENSP00000256458,9606.ENSP00000259206,9606.ENSP00000260010,9606.ENSP00000263339,9606.ENSP00000263341,9606.ENSP00000263464,9606.ENSP00000263642,9606.ENSP00000275015,9606.ENSP00000299663,9606.ENSP00000358983,9606.ENSP00000362994,9606.ENSP00000369213	NFKBIA,RIPK2,RELB,NFKB1,IRAK2,IL1RN,TLR2,IL1A,IL1B,BIRC3,IFIH1,NFKBIE,CLEC4E,NFKB2,TRAF1,DDX58	5.39e-15	7.08e-13	I-kappaB kinase/NF-kappaB signaling, and interleukin-1-mediated signaling pathway
NetworkNeighborAL	CL.3633	15	77	9606	9606.ENSP00000216797,9606.ENSP00000220751,9606.ENSP00000221452,9606.ENSP00000226574,9606.ENSP00000256458,9606.ENSP00000259206,9606.ENSP00000260010,9606.ENSP00000263339,9606.ENSP00000263341,9606.ENSP00000263464,9606.ENSP00000263642,9606.ENSP00000275015,9606.ENSP00000358983,9606.ENSP00000362994,9606.ENSP00000369213	NFKBIA,RIPK2,RELB,NFKB1,IRAK2,IL1RN,TLR2,IL1A,IL1B,BIRC3,IFIH1,NFKBIE,NFKB2,TRAF1,DDX58	2.16e-14	2.37e-12	I-kappaB kinase/NF-kappaB signaling, and interleukin-1-mediated signaling pathway
NetworkNeighborAL	CL.3634	13	60	9606	9606.ENSP00000216797,9606.ENSP00000220751,9606.ENSP00000221452,9606.ENSP00000226574,9606.ENSP00000256458,9606.ENSP00000259206,9606.ENSP00000260010,9606.ENSP00000263339,9606.ENSP00000263341,9606.ENSP00000263464,9606.ENSP00000275015,9606.ENSP00000358983,9606.ENSP00000362994	NFKBIA,RIPK2,RELB,NFKB1,IRAK2,IL1RN,TLR2,IL1A,IL1B,BIRC3,NFKBIE,NFKB2,TRAF1	3.74e-13	3.51e-11	interleukin-1-mediated signaling pathway, and TIR domain
NetworkNeighborAL	CL.4661	13	66	9606	9606.ENSP00000245185,9606.ENSP00000245414,9606.ENSP00000251642,9606.ENSP00000257570,9606.ENSP00000359488,9606.ENSP00000359490,9606.ENSP00000359497,9606.ENSP00000359504,9606.ENSP00000359512,9606.ENSP00000360883,9606.ENSP00000360891,9606.ENSP00000369299,9606.ENSP00000395590	MT2A,IRF1,DHX58,OASL,GBP5,GBP4,GBP2,GBP1,GBP3,IFIT3,IFIT2,TRIM22,IFI35	1.09e-12	8.92e-11	Interferon alpha/beta signaling, and Interferon gamma signaling
NetworkNeighborAL	CL.3636	8	33	9606	9606.ENSP00000216797,9606.ENSP00000220751,9606.ENSP00000221452,9606.ENSP00000226574,9606.ENSP00000263464,9606.ENSP00000275015,9606.ENSP00000358983,9606.ENSP00000362994	NFKBIA,RIPK2,RELB,NFKB1,BIRC3,NFKBIE,NFKB2,TRAF1	6.59e-09	3.94e-07	TAK1 activates NFkB by phosphorylation and activation of IKKs complex, and death-inducing signaling complex assembly
NetworkNeighborAL	CL.3637	7	22	9606	9606.ENSP00000216797,9606.ENSP00000221452,9606.ENSP00000226574,9606.ENSP00000263464,9606.ENSP00000275015,9606.ENSP00000358983,9606.ENSP00000362994	NFKBIA,RELB,NFKB1,BIRC3,NFKBIE,NFKB2,TRAF1	1.22e-08	6.68e-07	mixed, incl. IkBA variant leads to EDA-ID, and death-inducing signaling complex assembly
NetworkNeighborAL	CL.4744	6	13	9606	9606.ENSP00000245185,9606.ENSP00000359488,9606.ENSP00000359490,9606.ENSP00000359504,9606.ENSP00000359512,9606.ENSP00000369299	MT2A,GBP5,GBP4,GBP1,GBP3,TRIM22	2.35e-08	1.19e-06	mixed, incl. Guanylate-binding protein, C-terminal, and E3 ubiquitin-protein ligase TRIM38, PRY/SPRY domain
NetworkNeighborAL	CL.4665	7	35	9606	9606.ENSP00000245414,9606.ENSP00000251642,9606.ENSP00000257570,9606.ENSP00000359497,9606.ENSP00000360883,9606.ENSP00000360891,9606.ENSP00000395590	IRF1,DHX58,OASL,GBP2,IFIT3,IFIT2,IFI35	1.89e-07	8.27e-06	Interferon alpha/beta signaling
NetworkNeighborAL	CL.4668	6	25	9606	9606.ENSP00000245414,9606.ENSP00000257570,9606.ENSP00000359497,9606.ENSP00000360883,9606.ENSP00000360891,9606.ENSP00000395590	IRF1,OASL,GBP2,IFIT3,IFIT2,IFI35	5.77e-07	2.1e-05	type I interferon signaling pathway
NetworkNeighborAL	CL.909	6	26	9606	9606.ENSP00000220809,9606.ENSP00000287814,9606.ENSP00000339328,9606.ENSP00000361850,9606.ENSP00000398632,9606.ENSP00000415786	PLAT,TIMP4,PLAUR,PLAU,CD44,SERPINE2	7.04e-07	2.43e-05	PGBD-like superfamily, and Dissolution of Fibrin Clot
NetworkNeighborAL	CL.7361	6	29	9606	9606.ENSP00000006053,9606.ENSP00000226317,9606.ENSP00000296026,9606.ENSP00000296027,9606.ENSP00000379110,9606.ENSP00000427279	CX3CL1,CXCL6,CXCL3,CXCL5,CXCL1,CXCL2	1.23e-06	4.04e-05	Chemokine receptors bind chemokines
NetworkNeighborAL	CL.946	4	6	9606	9606.ENSP00000220809,9606.ENSP00000339328,9606.ENSP00000361850,9606.ENSP00000415786	PLAT,PLAUR,PLAU,SERPINE2	2e-06	6.25e-05	Dissolution of Fibrin Clot
NetworkNeighborAL	CL.4748	4	6	9606	9606.ENSP00000245185,9606.ENSP00000359504,9606.ENSP00000359512,9606.ENSP00000369299	MT2A,GBP1,GBP3,TRIM22	2e-06	6.25e-05	mixed, incl. Guanylate-binding protein, C-terminal, and E3 ubiquitin-protein ligase TRIM38, PRY/SPRY domain
NetworkNeighborAL	CL.3707	5	22	9606	9606.ENSP00000256458,9606.ENSP00000259206,9606.ENSP00000260010,9606.ENSP00000263339,9606.ENSP00000263341	IRAK2,IL1RN,TLR2,IL1A,IL1B	6.63e-06	0.00018	MyD88-dependent toll-like receptor signaling pathway, and Interleukin-1 conserved site
NetworkNeighborAL	CL.7364	5	24	9606	9606.ENSP00000226317,9606.ENSP00000296026,9606.ENSP00000296027,9606.ENSP00000379110,9606.ENSP00000427279	CXCL6,CXCL3,CXCL5,CXCL1,CXCL2	9.6e-06	0.00024	CXC Chemokine domain, and dendritic cell chemotaxis
NetworkNeighborAL	CL.4673	4	14	9606	9606.ENSP00000257570,9606.ENSP00000360883,9606.ENSP00000360891,9606.ENSP00000395590	OASL,IFIT3,IFIT2,IFI35	2.73e-05	0.00062	2'-5'-oligoadenylate synthase, and type I interferon signaling pathway
NetworkNeighborAL	CL.3741	3	5	9606	9606.ENSP00000259206,9606.ENSP00000263339,9606.ENSP00000263341	IL1RN,IL1A,IL1B	5.42e-05	0.0011	Interleukin-1 conserved site, and negative regulation of interleukin-1 alpha secretion
NetworkNeighborAL	CL.7397	3	6	9606	9606.ENSP00000226317,9606.ENSP00000379110,9606.ENSP00000427279	CXCL6,CXCL1,CXCL2	8.08e-05	0.0016	CXC chemokine receptor 1/2, and CXC chemokine
NetworkNeighborAL	CL.4676	3	7	9606	9606.ENSP00000257570,9606.ENSP00000360883,9606.ENSP00000360891	OASL,IFIT3,IFIT2	0.00011	0.0022	mixed, incl. 4Fe-4S single cluster domain, and Interferon-induced protein with tetratricopeptide repeats 3
NetworkNeighborAL	CL.3639	3	10	9606	9606.ENSP00000216797,9606.ENSP00000226574,9606.ENSP00000275015	NFKBIA,NFKB1,NFKBIE	0.00027	0.005	IkBA variant leads to EDA-ID, and Tumour necrosis factor alpha
NetworkNeighborAL	CL.10307	3	10	9606	9606.ENSP00000243347,9606.ENSP00000295927,9606.ENSP00000357981	TNFAIP6,PTX3,CTSS	0.00027	0.005	tertiary granule lumen
NetworkNeighborAL	CL.4918	3	15	9606	9606.ENSP00000161559,9606.ENSP00000246006,9606.ENSP00000453302	CEACAM1,CD93,ADAM8	0.00073	0.013	specific granule membrane
NetworkNeighborAL	CL.986	6	109	9606	9606.ENSP00000264144,9606.ENSP00000264832,9606.ENSP00000294728,9606.ENSP00000296585,9606.ENSP00000326888,9606.ENSP00000387261	LAMC2,ICAM1,VCAM1,ITGA2,LIMS2,PSTPIP2	0.0011	0.0189	Focal adhesion, and cell-substrate junction assembly
NetworkNeighborAL	CL.7134	8	196	9606	9606.ENSP00000006053,9606.ENSP00000225831,9606.ENSP00000226317,9606.ENSP00000296026,9606.ENSP00000296027,9606.ENSP00000351671,9606.ENSP00000379110,9606.ENSP00000427279	CX3CL1,CCL2,CXCL6,CXCL3,CXCL5,CCL20,CXCL1,CXCL2	0.0011	0.0189	G alpha (i) signalling events
NetworkNeighborAL	CL.328	3	21	9606	9606.ENSP00000263923,9606.ENSP00000314897,9606.ENSP00000422464	KDR,ANGPT2,PDGFC	0.0017	0.0279	PDGF/VEGF domain, and vascular endothelial growth factor-activated receptor activity
NetworkNeighborAL	CL.10249	4	48	9606	9606.ENSP00000243347,9606.ENSP00000295927,9606.ENSP00000357981,9606.ENSP00000472474	TNFAIP6,PTX3,CTSS,IL4I1	0.0019	0.0289	specific granule lumen, and tertiary granule lumen
NetworkNeighborAL	CL.6000	2	5	9606	9606.ENSP00000242208,9606.ENSP00000256759	INHBA,FST	0.002	0.0313	Antagonism of Activin by Follistatin, and inhibin binding
NetworkNeighborAL	CL.3802	2	5	9606	9606.ENSP00000317891,9606.ENSP00000481570	TNIP1,TNFAIP3	0.002	0.0313	NF-kappa-B essential modulator NEMO, CC2-LZ domain, and A20 peptidase
NetworkNeighborAL	CL.3758	2	5	9606	9606.ENSP00000263642,9606.ENSP00000369213	IFIH1,DDX58	0.002	0.0313	Caspase recruitment domain, and negative regulation of interferon-beta biosynthetic process
NetworkNeighborAL	CL.3665	2	5	9606	9606.ENSP00000263464,9606.ENSP00000362994	BIRC3,TRAF1	0.002	0.0313	TNF receptor-associated factor BIRC3 binding domain, and positive regulation of necroptotic process
NetworkNeighborAL	CL.5496	2	6	9606	9606.ENSP00000365280,9606.ENSP00000376436	ID1,ETS1	0.0027	0.0371	mixed, incl. Transforming protein C-ets, and Transcription factor Maf
NetworkNeighborAL	CL.5095	2	6	9606	9606.ENSP00000334928,9606.ENSP00000478591	PTPRB,NEURL3	0.0027	0.0371	Sprouty, and Dual specificity testis-specific protein kinase 1
NetworkNeighborAL	CL.404	5	90	9606	9606.ENSP00000265361,9606.ENSP00000265362,9606.ENSP00000284136,9606.ENSP00000340998,9606.ENSP00000357909	SEMA3C,SEMA3A,SEMA3D,NTN4,SEMA6C	0.0027	0.0371	Axon guidance, and DSCAM interactions
NetworkNeighborAL	CL.1027	2	6	9606	9606.ENSP00000264832,9606.ENSP00000294728	ICAM1,VCAM1	0.0027	0.0371	integrin alphaL-beta2 complex, and Intercellular adhesion molecule/vascular cell adhesion molecule, N-terminal
NetworkNeighborAL	CL.992	3	26	9606	9606.ENSP00000264832,9606.ENSP00000294728,9606.ENSP00000296585	ICAM1,VCAM1,ITGA2	0.003	0.0383	Integrin domain superfamily, and Intercellular adhesion molecule/vascular cell adhesion molecule, N-terminal
NetworkNeighborAL	CL.4907	5	100	9606	9606.ENSP00000161559,9606.ENSP00000246006,9606.ENSP00000334928,9606.ENSP00000453302,9606.ENSP00000478591	CEACAM1,CD93,PTPRB,ADAM8,NEURL3	0.0042	0.0494	specific granule membrane, and azurophil granule membrane
NetworkNeighborAL	CL.11077	2	8	9606	9606.ENSP00000222543,9606.ENSP00000252809	TFPI2,GDF15	0.0043	0.0496	mixed, incl. reduction of food intake in response to dietary excess, and Protein NDRG4
PMID	PMID.21655103	42	154	9606	9606.ENSP00000216797,9606.ENSP00000220751,9606.ENSP00000225831,9606.ENSP00000226317,9606.ENSP00000226574,9606.ENSP00000245414,9606.ENSP00000256495,9606.ENSP00000258534,9606.ENSP00000259874,9606.ENSP00000260010,9606.ENSP00000263339,9606.ENSP00000263341,9606.ENSP00000263464,9606.ENSP00000263642,9606.ENSP00000264832,9606.ENSP00000266671,9606.ENSP00000275015,9606.ENSP00000294728,9606.ENSP00000295522,…	NFKBIA,RIPK2,CCL2,CXCL6,NFKB1,IRF1,BHLHE40,DRAM1,IER3,TLR2,IL1A,IL1B,BIRC3,IFIH1,ICAM1,PHLDA1,NFKBIE,VCAM1,CLDN1,CXCL3,RRAD,TNIP1,NR4A2,CCL20,NUAK2,NFKB2,GBP1,IFIT3,IFIT2,SLC2A6,PLAU,ZC3H12A,TRAF1,DDX58,ETS1,IL6,IFI35,CXCL2,TNFAIP8,IL32,SOD2,TNFAIP3	4.59e-44	2.92e-38	(2011) Inflammatory gene regulatory networks in amnion cells following cytokine stimulation: translational systems approach to modeling human parturition.
PMID	PMID.19660139	27	68	9606	9606.ENSP00000006053,9606.ENSP00000216797,9606.ENSP00000222543,9606.ENSP00000225474,9606.ENSP00000225831,9606.ENSP00000243347,9606.ENSP00000245414,9606.ENSP00000259030,9606.ENSP00000263339,9606.ENSP00000263341,9606.ENSP00000263464,9606.ENSP00000263642,9606.ENSP00000264832,9606.ENSP00000265361,9606.ENSP00000294728,9606.ENSP00000296026,9606.ENSP00000296027,9606.ENSP00000331736,9606.ENSP00000351671,…	CX3CL1,NFKBIA,TFPI2,CSF3,CCL2,TNFAIP6,IRF1,RTP4,IL1A,IL1B,BIRC3,IFIH1,ICAM1,SEMA3C,VCAM1,CXCL3,CXCL5,SELE,CCL20,GBP1,IFIT3,TNFSF13B,CXCL1,IL6,IFI35,IL32,SOD2	4.15e-32	1.32e-26	(2009) Integrated microarray and multiplex cytokine analyses of Kaposi's Sarcoma Associated Herpesvirus viral FLICE Inhibitory Protein K13 affected genes and cytokines in human blood vascular endothelial cells.
PMID	PMID.24842522	24	104	9606	9606.ENSP00000216797,9606.ENSP00000221452,9606.ENSP00000225831,9606.ENSP00000243347,9606.ENSP00000245414,9606.ENSP00000251642,9606.ENSP00000256458,9606.ENSP00000257570,9606.ENSP00000259206,9606.ENSP00000260010,9606.ENSP00000263339,9606.ENSP00000263341,9606.ENSP00000263642,9606.ENSP00000264832,9606.ENSP00000275015,9606.ENSP00000325663,9606.ENSP00000351671,9606.ENSP00000360883,9606.ENSP00000360891,…	NFKBIA,RELB,CCL2,TNFAIP6,IRF1,DHX58,IRAK2,OASL,IL1RN,TLR2,IL1A,IL1B,IFIH1,ICAM1,NFKBIE,NFKBIZ,CCL20,IFIT3,IFIT2,DDX58,CXCL1,IL6,CXCL2,IL32	6.97e-24	1.48e-18	(2014) Identification of the key differential transcriptional responses of human whole blood following TLR2 or TLR4 ligation in-vitro.
PMID	PMID.19664281	22	88	9606	9606.ENSP00000216797,9606.ENSP00000221452,9606.ENSP00000225831,9606.ENSP00000226574,9606.ENSP00000245414,9606.ENSP00000257570,9606.ENSP00000260010,9606.ENSP00000263339,9606.ENSP00000263341,9606.ENSP00000263642,9606.ENSP00000325663,9606.ENSP00000358983,9606.ENSP00000359497,9606.ENSP00000359504,9606.ENSP00000359512,9606.ENSP00000360883,9606.ENSP00000360891,9606.ENSP00000362994,9606.ENSP00000369213,…	NFKBIA,RELB,CCL2,NFKB1,IRF1,OASL,TLR2,IL1A,IL1B,IFIH1,NFKBIZ,NFKB2,GBP2,GBP1,GBP3,IFIT3,IFIT2,TRAF1,DDX58,CXCL1,CXCL2,SOD2	1.26e-22	2e-17	(2009) Combined genome-wide expression profiling and targeted RNA interference in primary mouse macrophages reveals perturbation of transcriptional networks associated with interferon signalling.
PMID	PMID.19193236	21	75	9606	9606.ENSP00000216797,9606.ENSP00000221452,9606.ENSP00000225831,9606.ENSP00000226317,9606.ENSP00000226574,9606.ENSP00000241261,9606.ENSP00000260010,9606.ENSP00000263339,9606.ENSP00000263341,9606.ENSP00000264144,9606.ENSP00000264832,9606.ENSP00000296026,9606.ENSP00000317891,9606.ENSP00000325663,9606.ENSP00000351671,9606.ENSP00000358983,9606.ENSP00000379110,9606.ENSP00000385675,9606.ENSP00000427279,…	NFKBIA,RELB,CCL2,CXCL6,NFKB1,TNFSF10,TLR2,IL1A,IL1B,LAMC2,ICAM1,CXCL3,TNIP1,NFKBIZ,CCL20,NFKB2,CXCL1,IL6,CXCL2,IL32,TNFAIP3	1.6e-22	2.03e-17	(2009) Induction of a chemoattractant transcriptional response by a Campylobacter jejuni boiled cell extract in colonocytes.
PMID	PMID.19405838	18	42	9606	9606.ENSP00000216797,9606.ENSP00000221452,9606.ENSP00000225831,9606.ENSP00000245414,9606.ENSP00000256458,9606.ENSP00000263341,9606.ENSP00000264832,9606.ENSP00000275015,9606.ENSP00000294728,9606.ENSP00000296026,9606.ENSP00000296027,9606.ENSP00000325663,9606.ENSP00000351671,9606.ENSP00000362994,9606.ENSP00000376436,9606.ENSP00000379110,9606.ENSP00000385675,9606.ENSP00000398632	NFKBIA,RELB,CCL2,IRF1,IRAK2,IL1B,ICAM1,NFKBIE,VCAM1,CXCL3,CXCL5,NFKBIZ,CCL20,TRAF1,ETS1,CXCL1,IL6,CD44	3.31e-22	3.51e-17	(2009) Expression profile of human gingival fibroblasts induced by interleukin-1beta reveals central role of nuclear factor-kappa B in stabilizing human gingival fibroblasts during inflammation.
PMID	PMID.23613998	19	54	9606	9606.ENSP00000006053,9606.ENSP00000216797,9606.ENSP00000221452,9606.ENSP00000225831,9606.ENSP00000226317,9606.ENSP00000226574,9606.ENSP00000263339,9606.ENSP00000264832,9606.ENSP00000294728,9606.ENSP00000296026,9606.ENSP00000325663,9606.ENSP00000331736,9606.ENSP00000351671,9606.ENSP00000355249,9606.ENSP00000358983,9606.ENSP00000362994,9606.ENSP00000427279,9606.ENSP00000427424,9606.ENSP00000481570	CX3CL1,NFKBIA,RELB,CCL2,CXCL6,NFKB1,IL1A,ICAM1,VCAM1,CXCL3,NFKBIZ,SELE,CCL20,E2F2,NFKB2,TRAF1,CXCL2,TNFAIP8,TNFAIP3	4.7e-22	4.28e-17	(2013) Acidosis activation of the proton-sensing GPR4 receptor stimulates vascular endothelial cell inflammatory responses revealed by transcriptome analysis.
PMID	PMID.19884985	27	186	9606	9606.ENSP00000216797,9606.ENSP00000220751,9606.ENSP00000222553,9606.ENSP00000225474,9606.ENSP00000225831,9606.ENSP00000228534,9606.ENSP00000241261,9606.ENSP00000243347,9606.ENSP00000257570,9606.ENSP00000259206,9606.ENSP00000259874,9606.ENSP00000263339,9606.ENSP00000263341,9606.ENSP00000264832,9606.ENSP00000294728,9606.ENSP00000296027,9606.ENSP00000311697,9606.ENSP00000339328,9606.ENSP00000351671,…	NFKBIA,RIPK2,NAMPT,CSF3,CCL2,IL23A,TNFSF10,TNFAIP6,OASL,IL1RN,IER3,IL1A,IL1B,ICAM1,VCAM1,CXCL5,FGF5,PLAUR,CCL20,IL24,TYMP,CXCL1,IL6,CD44,SERPINE2,PDGFC,CXCL2	4.82e-22	4.28e-17	(2009) Cytokines and cytokine profiles in human autoimmune diseases and animal models of autoimmunity.
PMID	PMID.23437179	22	96	9606	9606.ENSP00000216797,9606.ENSP00000220809,9606.ENSP00000225831,9606.ENSP00000226574,9606.ENSP00000242208,9606.ENSP00000263339,9606.ENSP00000263341,9606.ENSP00000264144,9606.ENSP00000264832,9606.ENSP00000265080,9606.ENSP00000275015,9606.ENSP00000294728,9606.ENSP00000296585,9606.ENSP00000311697,9606.ENSP00000351671,9606.ENSP00000352606,9606.ENSP00000361850,9606.ENSP00000362994,9606.ENSP00000379110,…	NFKBIA,PLAT,CCL2,NFKB1,INHBA,IL1A,IL1B,LAMC2,ICAM1,RASGRF2,NFKBIE,VCAM1,ITGA2,FGF5,CCL20,HAPLN3,PLAU,TRAF1,CXCL1,IL6,CD44,DOCK4	6.47e-22	4.57e-17	(2013) An integrated expression profiling reveals target genes of TGF-Beta and TNF-Alfa possibly mediated by microRNAs in lung cancer cells.
PMID	PMID.29712924	23	116	9606	9606.ENSP00000216797,9606.ENSP00000225831,9606.ENSP00000226574,9606.ENSP00000245414,9606.ENSP00000256495,9606.ENSP00000257570,9606.ENSP00000260010,9606.ENSP00000263339,9606.ENSP00000263341,9606.ENSP00000264832,9606.ENSP00000267569,9606.ENSP00000285379,9606.ENSP00000296026,9606.ENSP00000296027,9606.ENSP00000299663,9606.ENSP00000344479,9606.ENSP00000359488,9606.ENSP00000362179,9606.ENSP00000362524,…	NFKBIA,CCL2,NFKB1,IRF1,BHLHE40,OASL,TLR2,IL1A,IL1B,ICAM1,JDP2,CA2,CXCL3,CXCL5,CLEC4E,NR4A2,GBP5,ZC3H12A,ANGPTL2,ETS1,IL6,CXCL2,POU2F2	1.28e-21	8.13e-17	(2018) Transcriptional landscape of Mycobacterium tuberculosis infection in macrophages.
PMID	PMID.20836000	24	138	9606	9606.ENSP00000161559,9606.ENSP00000225474,9606.ENSP00000225831,9606.ENSP00000226317,9606.ENSP00000226574,9606.ENSP00000260010,9606.ENSP00000263339,9606.ENSP00000263341,9606.ENSP00000264832,9606.ENSP00000296026,9606.ENSP00000339328,9606.ENSP00000344479,9606.ENSP00000351671,9606.ENSP00000358983,9606.ENSP00000360883,9606.ENSP00000360891,9606.ENSP00000361850,9606.ENSP00000379110,9606.ENSP00000385675,…	CEACAM1,CSF3,CCL2,CXCL6,NFKB1,TLR2,IL1A,IL1B,ICAM1,CXCL3,PLAUR,NR4A2,CCL20,NFKB2,IFIT3,IFIT2,PLAU,CXCL1,IL6,DYSF,IFI35,CD44,CXCL2,TNFAIP8	2.47e-21	1.43e-16	(2009) Role of neutrophils in innate immunity: a systems biology-level approach.
PMID	PMID.29321478	21	88	9606	9606.ENSP00000220751,9606.ENSP00000222553,9606.ENSP00000245414,9606.ENSP00000251642,9606.ENSP00000254958,9606.ENSP00000256458,9606.ENSP00000263339,9606.ENSP00000263341,9606.ENSP00000263642,9606.ENSP00000278590,9606.ENSP00000296026,9606.ENSP00000317891,9606.ENSP00000330696,9606.ENSP00000359490,9606.ENSP00000359497,9606.ENSP00000359504,9606.ENSP00000369213,9606.ENSP00000379110,9606.ENSP00000385675,…	RIPK2,NAMPT,IRF1,DHX58,JAG1,IRAK2,IL1A,IL1B,IFIH1,ZC3H12C,CXCL3,TNIP1,P2RX7,GBP4,GBP2,GBP1,DDX58,CXCL1,IL6,PSTPIP2,CXCL2	2.78e-21	1.47e-16	(2018) Reprogramming of pro-inflammatory human macrophages to an anti-inflammatory phenotype by bile acids.
PMID	PMID.30407731	19	62	9606	9606.ENSP00000216797,9606.ENSP00000241261,9606.ENSP00000245414,9606.ENSP00000259206,9606.ENSP00000263339,9606.ENSP00000263341,9606.ENSP00000264832,9606.ENSP00000325663,9606.ENSP00000339328,9606.ENSP00000351671,9606.ENSP00000361850,9606.ENSP00000362994,9606.ENSP00000376436,9606.ENSP00000385675,9606.ENSP00000398632,9606.ENSP00000427279,9606.ENSP00000431603,9606.ENSP00000432218,9606.ENSP00000481570	NFKBIA,TNFSF10,IRF1,IL1RN,IL1A,IL1B,ICAM1,NFKBIZ,PLAUR,CCL20,PLAU,TRAF1,ETS1,IL6,CD44,CXCL2,POU2F2,IL32,TNFAIP3	4.17e-21	2.04e-16	(2019) Biofilm-induced profiles of immune response gene expression by oral epithelial cells.
PMID	PMID.28747667	20	79	9606	9606.ENSP00000006053,9606.ENSP00000221452,9606.ENSP00000225831,9606.ENSP00000226574,9606.ENSP00000245414,9606.ENSP00000257570,9606.ENSP00000259206,9606.ENSP00000263339,9606.ENSP00000263341,9606.ENSP00000263642,9606.ENSP00000296026,9606.ENSP00000358983,9606.ENSP00000359490,9606.ENSP00000360883,9606.ENSP00000360891,9606.ENSP00000379110,9606.ENSP00000384212,9606.ENSP00000385675,9606.ENSP00000395590,…	CX3CL1,RELB,CCL2,NFKB1,IRF1,OASL,IL1RN,IL1A,IL1B,IFIH1,CXCL3,NFKB2,GBP4,IFIT3,IFIT2,CXCL1,IL18BP,IL6,IFI35,TNFAIP3	9.31e-21	4.23e-16	(2017) RNA sequencing reveals resistance of TLR4 ligand-activated microglial cells to inflammation mediated by the selective jumonji H3K27 demethylase inhibitor.
PMID	PMID.23349769	17	43	9606	9606.ENSP00000216797,9606.ENSP00000225474,9606.ENSP00000225831,9606.ENSP00000245414,9606.ENSP00000263341,9606.ENSP00000263464,9606.ENSP00000325663,9606.ENSP00000351671,9606.ENSP00000355996,9606.ENSP00000360883,9606.ENSP00000361458,9606.ENSP00000379110,9606.ENSP00000385675,9606.ENSP00000404179,9606.ENSP00000432218,9606.ENSP00000446252,9606.ENSP00000481570	NFKBIA,CSF3,CCL2,IRF1,IL1B,BIRC3,NFKBIZ,CCL20,G0S2,IFIT3,TSC22D3,CXCL1,IL6,DOCK4,IL32,SOD2,TNFAIP3	1.49e-20	6.31e-16	(2013) Glucocorticoid repression of inflammatory gene expression shows differential responsiveness by transactivation- and transrepression-dependent mechanisms.
PMID	PMID.27444640	20	82	9606	9606.ENSP00000006053,9606.ENSP00000221452,9606.ENSP00000225831,9606.ENSP00000226317,9606.ENSP00000243347,9606.ENSP00000245414,9606.ENSP00000256458,9606.ENSP00000257570,9606.ENSP00000263339,9606.ENSP00000263341,9606.ENSP00000263642,9606.ENSP00000296026,9606.ENSP00000360883,9606.ENSP00000360891,9606.ENSP00000385675,9606.ENSP00000398632,9606.ENSP00000427279,9606.ENSP00000427424,9606.ENSP00000432218,…	CX3CL1,RELB,CCL2,CXCL6,TNFAIP6,IRF1,IRAK2,OASL,IL1A,IL1B,IFIH1,CXCL3,IFIT3,IFIT2,IL6,CD44,CXCL2,TNFAIP8,IL32,TNFAIP3	1.76e-20	6.99e-16	(2016) Transcriptome sequencing wide functional analysis of human mesenchymal stem cells in response to TLR4 ligand.
PMID	PMID.28210256	22	117	9606	9606.ENSP00000225831,9606.ENSP00000226574,9606.ENSP00000245414,9606.ENSP00000257570,9606.ENSP00000260010,9606.ENSP00000263339,9606.ENSP00000263341,9606.ENSP00000263642,9606.ENSP00000264832,9606.ENSP00000294728,9606.ENSP00000296027,9606.ENSP00000331736,9606.ENSP00000351671,9606.ENSP00000360231,9606.ENSP00000361850,9606.ENSP00000369213,9606.ENSP00000372170,9606.ENSP00000385675,9606.ENSP00000427279,…	CCL2,NFKB1,IRF1,OASL,TLR2,IL1A,IL1B,IFIH1,ICAM1,VCAM1,CXCL5,SELE,CCL20,NFIA,PLAU,DDX58,MSX1,IL6,CXCL2,SAA2,C1R,TNFAIP3	2.77e-20	1.04e-15	(2017) Transcriptomic Analysis of the Innate Antiviral Immune Response in Porcine Intestinal Epithelial Cells: Influence of Immunobiotic Lactobacilli.
PMID	PMID.26539195	26	199	9606	9606.ENSP00000216797,9606.ENSP00000221452,9606.ENSP00000222553,9606.ENSP00000225831,9606.ENSP00000226574,9606.ENSP00000228280,9606.ENSP00000243347,9606.ENSP00000245185,9606.ENSP00000245414,9606.ENSP00000259206,9606.ENSP00000260010,9606.ENSP00000260356,9606.ENSP00000263339,9606.ENSP00000263341,9606.ENSP00000264832,9606.ENSP00000296026,9606.ENSP00000357981,9606.ENSP00000358983,9606.ENSP00000359497,…	NFKBIA,RELB,NAMPT,CCL2,NFKB1,KITLG,TNFAIP6,MT2A,IRF1,IL1RN,TLR2,THBS1,IL1A,IL1B,ICAM1,CXCL3,CTSS,NFKB2,GBP2,TSC22D3,CXCL1,IL6,JAK3,CXCL2,SOD2,TNFAIP3	3.2e-20	1.04e-15	(2015) Gene Expression Profiling of Human Monocyte-derived Dendritic Cells - Searching for Molecular Regulators of Tolerogenicity.
PMID	PMID.24315792	18	57	9606	9606.ENSP00000225831,9606.ENSP00000226317,9606.ENSP00000241261,9606.ENSP00000260356,9606.ENSP00000263339,9606.ENSP00000263341,9606.ENSP00000264832,9606.ENSP00000294728,9606.ENSP00000296026,9606.ENSP00000296027,9606.ENSP00000331736,9606.ENSP00000344479,9606.ENSP00000351671,9606.ENSP00000358983,9606.ENSP00000361850,9606.ENSP00000379110,9606.ENSP00000385675,9606.ENSP00000427279	CCL2,CXCL6,TNFSF10,THBS1,IL1A,IL1B,ICAM1,VCAM1,CXCL3,CXCL5,SELE,NR4A2,CCL20,NFKB2,PLAU,CXCL1,IL6,CXCL2	3e-20	1.04e-15	(2014) Pro-inflammatory stimulation of meniscus cells increases production of matrix metalloproteinases and additional catabolic factors involved in osteoarthritis pathogenesis.
PMID	PMID.18811943	21	101	9606	9606.ENSP00000216797,9606.ENSP00000225474,9606.ENSP00000225831,9606.ENSP00000226317,9606.ENSP00000243347,9606.ENSP00000245414,9606.ENSP00000259206,9606.ENSP00000259874,9606.ENSP00000260010,9606.ENSP00000261292,9606.ENSP00000263339,9606.ENSP00000263341,9606.ENSP00000264832,9606.ENSP00000325663,9606.ENSP00000351671,9606.ENSP00000359497,9606.ENSP00000359504,9606.ENSP00000379110,9606.ENSP00000385675,…	NFKBIA,CSF3,CCL2,CXCL6,TNFAIP6,IRF1,IL1RN,IER3,TLR2,LIPG,IL1A,IL1B,ICAM1,NFKBIZ,CCL20,GBP2,GBP1,CXCL1,IL6,PSTPIP2,CXCL2	3.34e-20	1.04e-15	(2008) Analysis of porcine transcriptional response to Salmonella enterica serovar Choleraesuis suggests novel targets of NFkappaB are activated in the mesenteric lymph node.
PMID	PMID.16177180	17	45	9606	9606.ENSP00000216797,9606.ENSP00000221452,9606.ENSP00000226574,9606.ENSP00000261292,9606.ENSP00000263464,9606.ENSP00000264832,9606.ENSP00000275015,9606.ENSP00000294728,9606.ENSP00000296026,9606.ENSP00000296027,9606.ENSP00000351671,9606.ENSP00000357981,9606.ENSP00000358983,9606.ENSP00000359504,9606.ENSP00000385675,9606.ENSP00000427279,9606.ENSP00000432218	NFKBIA,RELB,NFKB1,LIPG,BIRC3,ICAM1,NFKBIE,VCAM1,CXCL3,CXCL5,CCL20,CTSS,NFKB2,GBP1,IL6,CXCL2,IL32	2.79e-20	1.04e-15	(2005) NF-kappaB controls the global pro-inflammatory response in endothelial cells: evidence for the regulation of a pro-atherogenic program.
PMID	PMID.31487323	21	102	9606	9606.ENSP00000006053,9606.ENSP00000225474,9606.ENSP00000225831,9606.ENSP00000226317,9606.ENSP00000226574,9606.ENSP00000251642,9606.ENSP00000259206,9606.ENSP00000263339,9606.ENSP00000263341,9606.ENSP00000263464,9606.ENSP00000263642,9606.ENSP00000264346,9606.ENSP00000264832,9606.ENSP00000296026,9606.ENSP00000351671,9606.ENSP00000360883,9606.ENSP00000360891,9606.ENSP00000369213,9606.ENSP00000376436,…	CX3CL1,CSF3,CCL2,CXCL6,NFKB1,DHX58,IL1RN,IL1A,IL1B,BIRC3,IFIH1,HERC6,ICAM1,CXCL3,CCL20,IFIT3,IFIT2,DDX58,ETS1,IL6,CXCL2	4e-20	1.16e-15	(2019) Differential gene expression in bovine endometrial epithelial cells after challenge with LPS; specific implications for genes involved in embryo maternal interactions.
PMID	PMID.29434599	21	103	9606	9606.ENSP00000216797,9606.ENSP00000221452,9606.ENSP00000226574,9606.ENSP00000245414,9606.ENSP00000256458,9606.ENSP00000259206,9606.ENSP00000263339,9606.ENSP00000263341,9606.ENSP00000263464,9606.ENSP00000265087,9606.ENSP00000278590,9606.ENSP00000296027,9606.ENSP00000317891,9606.ENSP00000351671,9606.ENSP00000357981,9606.ENSP00000358983,9606.ENSP00000360891,9606.ENSP00000376436,9606.ENSP00000379110,…	NFKBIA,RELB,NFKB1,IRF1,IRAK2,IL1RN,IL1A,IL1B,BIRC3,STC2,ZC3H12C,CXCL5,TNIP1,CCL20,CTSS,NFKB2,IFIT2,ETS1,CXCL1,IL32,TNFAIP3	4.77e-20	1.32e-15	(2018) RNA-Seq Analysis of IL-1B and IL-36 Responses in Epidermal Keratinocytes Identifies a Shared MyD88-Dependent Gene Signature.
PMID	PMID.25347003	17	48	9606	9606.ENSP00000216797,9606.ENSP00000225474,9606.ENSP00000225831,9606.ENSP00000226317,9606.ENSP00000260010,9606.ENSP00000263341,9606.ENSP00000263464,9606.ENSP00000264832,9606.ENSP00000275015,9606.ENSP00000296026,9606.ENSP00000325663,9606.ENSP00000339328,9606.ENSP00000351671,9606.ENSP00000361850,9606.ENSP00000362179,9606.ENSP00000379110,9606.ENSP00000427279	NFKBIA,CSF3,CCL2,CXCL6,TLR2,IL1B,BIRC3,ICAM1,NFKBIE,CXCL3,NFKBIZ,PLAUR,CCL20,PLAU,ZC3H12A,CXCL1,CXCL2	6.87e-20	1.82e-15	(2014) Neisseria meningitidis elicits a pro-inflammatory response involving IKBZeta in a human blood-cerebrospinal fluid barrier model.
PMID	PMID.28068976	15	29	9606	9606.ENSP00000216797,9606.ENSP00000225831,9606.ENSP00000226574,9606.ENSP00000243347,9606.ENSP00000245414,9606.ENSP00000263341,9606.ENSP00000263464,9606.ENSP00000265087,9606.ENSP00000325663,9606.ENSP00000362179,9606.ENSP00000379110,9606.ENSP00000385675,9606.ENSP00000427279,9606.ENSP00000446252,9606.ENSP00000481570	NFKBIA,CCL2,NFKB1,TNFAIP6,IRF1,IL1B,BIRC3,STC2,NFKBIZ,ZC3H12A,CXCL1,IL6,CXCL2,SOD2,TNFAIP3	1.16e-19	2.94e-15	(2017) IL-1Beta-induced modulation of gene expression profile in human dermal fibroblasts: the effects of Thai herbal Sahatsatara formula, piperine and gallic acid possessing antioxidant properties.
PMID	PMID.18612392	22	127	9606	9606.ENSP00000221452,9606.ENSP00000225474,9606.ENSP00000225831,9606.ENSP00000245414,9606.ENSP00000260010,9606.ENSP00000263339,9606.ENSP00000263341,9606.ENSP00000275015,9606.ENSP00000294728,9606.ENSP00000296027,9606.ENSP00000331736,9606.ENSP00000351671,9606.ENSP00000358983,9606.ENSP00000359497,9606.ENSP00000359504,9606.ENSP00000360891,9606.ENSP00000379110,9606.ENSP00000385675,9606.ENSP00000395590,…	RELB,CSF3,CCL2,IRF1,TLR2,IL1A,IL1B,NFKBIE,VCAM1,CXCL5,SELE,CCL20,NFKB2,GBP2,GBP1,IFIT2,CXCL1,IL6,IFI35,SAA2,SOD2,TNFAIP3	1.32e-19	3.24e-15	(2008) Identification of a common gene expression response in different lung inflammatory diseases in rodents and macaques.
PMID	PMID.28263993	27	237	9606	9606.ENSP00000216797,9606.ENSP00000220751,9606.ENSP00000221452,9606.ENSP00000225474,9606.ENSP00000225831,9606.ENSP00000226574,9606.ENSP00000241261,9606.ENSP00000245414,9606.ENSP00000256458,9606.ENSP00000259874,9606.ENSP00000263341,9606.ENSP00000275015,9606.ENSP00000299663,9606.ENSP00000317891,9606.ENSP00000325663,9606.ENSP00000341843,9606.ENSP00000358983,9606.ENSP00000360891,9606.ENSP00000362179,…	NFKBIA,RIPK2,RELB,CSF3,CCL2,NFKB1,TNFSF10,IRF1,IRAK2,IER3,IL1B,NFKBIE,CLEC4E,TNIP1,NFKBIZ,ETV7,NFKB2,IFIT2,ZC3H12A,TRAF1,DDX58,ETS1,IL6,JAK3,CYLD,TNFAIP8,TNFAIP3	1.45e-19	3.42e-15	(2017) Analysis of the human monocyte-derived macrophage transcriptome and response to lipopolysaccharide provides new insights into genetic aetiology of inflammatory bowel disease.
PMID	PMID.22911729	20	94	9606	9606.ENSP00000216797,9606.ENSP00000220809,9606.ENSP00000221452,9606.ENSP00000222553,9606.ENSP00000256495,9606.ENSP00000259874,9606.ENSP00000263464,9606.ENSP00000264832,9606.ENSP00000266671,9606.ENSP00000294728,9606.ENSP00000317891,9606.ENSP00000325663,9606.ENSP00000344479,9606.ENSP00000358983,9606.ENSP00000360883,9606.ENSP00000362994,9606.ENSP00000391676,9606.ENSP00000392025,9606.ENSP00000427279,…	NFKBIA,PLAT,RELB,NAMPT,BHLHE40,IER3,BIRC3,ICAM1,PHLDA1,VCAM1,TNIP1,NFKBIZ,NR4A2,NFKB2,IFIT3,TRAF1,JAK3,CYLD,CXCL2,TNFAIP3	1.83e-19	4.16e-15	(2012) The transcription profile of Tax-3 is more similar to Tax-1 than Tax-2: insights into HTLV-3 potential leukemogenic properties.
PMID	PMID.31178859	23	155	9606	9606.ENSP00000004531,9606.ENSP00000220751,9606.ENSP00000225831,9606.ENSP00000226574,9606.ENSP00000234111,9606.ENSP00000245414,9606.ENSP00000259206,9606.ENSP00000263339,9606.ENSP00000263341,9606.ENSP00000263642,9606.ENSP00000264832,9606.ENSP00000294728,9606.ENSP00000296861,9606.ENSP00000339328,9606.ENSP00000360891,9606.ENSP00000362994,9606.ENSP00000379110,9606.ENSP00000385675,9606.ENSP00000391676,…	SLC7A2,RIPK2,CCL2,NFKB1,ODC1,IRF1,IL1RN,IL1A,IL1B,IFIH1,ICAM1,VCAM1,TNFRSF21,PLAUR,IFIT2,TRAF1,CXCL1,IL6,JAK3,IFI35,CD44,CXCL2,TNFAIP3	4.19e-19	9.2e-15	(2019) Macrophage Polarization: Different Gene Signatures in M1(LPS+) vs. Classically and M2(LPS-) vs. Alternatively Activated Macrophages.
PMID	PMID.29410537	16	43	9606	9606.ENSP00000225474,9606.ENSP00000225831,9606.ENSP00000228280,9606.ENSP00000243347,9606.ENSP00000263339,9606.ENSP00000263341,9606.ENSP00000296026,9606.ENSP00000296027,9606.ENSP00000351671,9606.ENSP00000362179,9606.ENSP00000365048,9606.ENSP00000375795,9606.ENSP00000379110,9606.ENSP00000385675,9606.ENSP00000427424,9606.ENSP00000432218	CSF3,CCL2,KITLG,TNFAIP6,IL1A,IL1B,CXCL3,CXCL5,CCL20,ZC3H12A,TNFSF13B,IL24,CXCL1,IL6,TNFAIP8,IL32	4.55e-19	9.64e-15	(2018) Spheroid-cultured human umbilical cord-derived mesenchymal stem cells attenuate hepatic ischemia-reperfusion injury in rats.
PMID	PMID.29176033	16	43	9606	9606.ENSP00000225831,9606.ENSP00000245414,9606.ENSP00000263339,9606.ENSP00000263341,9606.ENSP00000263642,9606.ENSP00000264832,9606.ENSP00000294728,9606.ENSP00000296027,9606.ENSP00000351671,9606.ENSP00000359490,9606.ENSP00000359504,9606.ENSP00000369213,9606.ENSP00000379110,9606.ENSP00000385675,9606.ENSP00000395590,9606.ENSP00000432218	CCL2,IRF1,IL1A,IL1B,IFIH1,ICAM1,VCAM1,CXCL5,CCL20,GBP4,GBP1,DDX58,CXCL1,IL6,IFI35,IL32	4.55e-19	9.64e-15	(2017) TNFAlfa-senescence initiates a STAT-dependent positive feedback loop, leading to a sustained interferon signature, DNA damage, and cytokine secretion.
PMID	PMID.19710636	16	43	9606	9606.ENSP00000216797,9606.ENSP00000225474,9606.ENSP00000242208,9606.ENSP00000257570,9606.ENSP00000259206,9606.ENSP00000263341,9606.ENSP00000264832,9606.ENSP00000296026,9606.ENSP00000325663,9606.ENSP00000351671,9606.ENSP00000362179,9606.ENSP00000379110,9606.ENSP00000385675,9606.ENSP00000427279,9606.ENSP00000446252,9606.ENSP00000481570	NFKBIA,CSF3,INHBA,OASL,IL1RN,IL1B,ICAM1,CXCL3,NFKBIZ,CCL20,ZC3H12A,CXCL1,IL6,CXCL2,SOD2,TNFAIP3	4.55e-19	9.64e-15	(2010) Rhinovirus-induced modulation of gene expression in bronchial epithelial cells from subjects with asthma.
PMID	PMID.21702919	19	84	9606	9606.ENSP00000216797,9606.ENSP00000221452,9606.ENSP00000225831,9606.ENSP00000226574,9606.ENSP00000259874,9606.ENSP00000260010,9606.ENSP00000263339,9606.ENSP00000263341,9606.ENSP00000263464,9606.ENSP00000275015,9606.ENSP00000294728,9606.ENSP00000296026,9606.ENSP00000325663,9606.ENSP00000351671,9606.ENSP00000358983,9606.ENSP00000365048,9606.ENSP00000369213,9606.ENSP00000427279,9606.ENSP00000438615	NFKBIA,RELB,CCL2,NFKB1,IER3,TLR2,IL1A,IL1B,BIRC3,NFKBIE,VCAM1,CXCL3,NFKBIZ,CCL20,NFKB2,TNFSF13B,DDX58,CXCL2,C1R	5.59e-19	1.08e-14	(2011) Comparative expression profiling of E. coli and S. aureus inoculated primary mammary gland cells sampled from cows with different genetic predispositions for somatic cell score.
PMID	PMID.31067687	17	57	9606	9606.ENSP00000222553,9606.ENSP00000225831,9606.ENSP00000241261,9606.ENSP00000251642,9606.ENSP00000260010,9606.ENSP00000263341,9606.ENSP00000263642,9606.ENSP00000264832,9606.ENSP00000294728,9606.ENSP00000360883,9606.ENSP00000360891,9606.ENSP00000362179,9606.ENSP00000362994,9606.ENSP00000369213,9606.ENSP00000379110,9606.ENSP00000385675,9606.ENSP00000481570	NAMPT,CCL2,TNFSF10,DHX58,TLR2,IL1B,IFIH1,ICAM1,VCAM1,IFIT3,IFIT2,ZC3H12A,TRAF1,DDX58,CXCL1,IL6,TNFAIP3	7.8e-19	1.46e-14	(2019) Transcriptomic Analysis Reveals Priming of The Host Antiviral Interferon Signaling Pathway by Bronchobini(R) Resulting in Balanced Immune Response to Rhinovirus Infection in Mouse Lung Tissue Slices.
PMID	PMID.16522205	17	57	9606	9606.ENSP00000220751,9606.ENSP00000226574,9606.ENSP00000241261,9606.ENSP00000254958,9606.ENSP00000256458,9606.ENSP00000260010,9606.ENSP00000263339,9606.ENSP00000263341,9606.ENSP00000264832,9606.ENSP00000294728,9606.ENSP00000295522,9606.ENSP00000296026,9606.ENSP00000296027,9606.ENSP00000296575,9606.ENSP00000351671,9606.ENSP00000385675,9606.ENSP00000427279	RIPK2,NFKB1,TNFSF10,JAG1,IRAK2,TLR2,IL1A,IL1B,ICAM1,VCAM1,CLDN1,CXCL3,CXCL5,HHIP,CCL20,IL6,CXCL2	7.8e-19	1.46e-14	(2006) Cross-platform expression profiling demonstrates that SV40 small tumor antigen activates Notch, Hedgehog, and Wnt signaling in human cells.
PMID	PMID.30704470	20	103	9606	9606.ENSP00000216797,9606.ENSP00000220809,9606.ENSP00000225831,9606.ENSP00000240100,9606.ENSP00000245414,9606.ENSP00000259874,9606.ENSP00000260010,9606.ENSP00000263464,9606.ENSP00000265362,9606.ENSP00000294728,9606.ENSP00000338157,9606.ENSP00000339328,9606.ENSP00000360855,9606.ENSP00000361458,9606.ENSP00000361850,9606.ENSP00000365048,9606.ENSP00000376436,9606.ENSP00000379110,9606.ENSP00000385675,…	NFKBIA,PLAT,CCL2,DUSP4,IRF1,IER3,TLR2,BIRC3,SEMA3A,VCAM1,ZBTB16,PLAUR,SLC16A12,TSC22D3,PLAU,TNFSF13B,ETS1,CXCL1,IL6,TNFAIP3	8.88e-19	1.57e-14	(2019) Glucocorticoid-driven transcriptomes in human airway epithelial cells: commonalities, differences and functional insight from cell lines and primary cells.
PMID	PMID.31781116	18	72	9606	9606.ENSP00000216797,9606.ENSP00000221452,9606.ENSP00000222553,9606.ENSP00000225831,9606.ENSP00000226317,9606.ENSP00000256458,9606.ENSP00000263339,9606.ENSP00000263341,9606.ENSP00000263464,9606.ENSP00000264832,9606.ENSP00000351671,9606.ENSP00000358983,9606.ENSP00000362179,9606.ENSP00000379110,9606.ENSP00000385675,9606.ENSP00000446252,9606.ENSP00000472546,9606.ENSP00000481570	NFKBIA,RELB,NAMPT,CCL2,CXCL6,IRAK2,IL1A,IL1B,BIRC3,ICAM1,CCL20,NFKB2,ZC3H12A,CXCL1,IL6,SOD2,PLA2G4C,TNFAIP3	1.04e-18	1.79e-14	(2019) Human Islet Response to Selected Type 1 Diabetes-Associated Bacteria: A Transcriptome-Based Study.
PMID	PMID.23516507	15	35	9606	9606.ENSP00000226317,9606.ENSP00000241261,9606.ENSP00000259206,9606.ENSP00000263339,9606.ENSP00000263341,9606.ENSP00000263464,9606.ENSP00000264832,9606.ENSP00000296026,9606.ENSP00000351671,9606.ENSP00000358983,9606.ENSP00000370812,9606.ENSP00000379110,9606.ENSP00000385675,9606.ENSP00000427279,9606.ENSP00000481570	CXCL6,TNFSF10,IL1RN,IL1A,IL1B,BIRC3,ICAM1,CXCL3,CCL20,NFKB2,ESM1,CXCL1,IL6,CXCL2,TNFAIP3	1.07e-18	1.8e-14	(2013) The landscape of host transcriptional response programs commonly perturbed by bacterial pathogens: towards host-oriented broad-spectrum drug targets.
PMID	PMID.31744921	15	36	9606	9606.ENSP00000216797,9606.ENSP00000221452,9606.ENSP00000225831,9606.ENSP00000259874,9606.ENSP00000260010,9606.ENSP00000263464,9606.ENSP00000264832,9606.ENSP00000294728,9606.ENSP00000296026,9606.ENSP00000351671,9606.ENSP00000379110,9606.ENSP00000398632,9606.ENSP00000432218,9606.ENSP00000472546,9606.ENSP00000481570	NFKBIA,RELB,CCL2,IER3,TLR2,BIRC3,ICAM1,VCAM1,CXCL3,CCL20,CXCL1,CD44,IL32,PLA2G4C,TNFAIP3	1.51e-18	2.46e-14	(2019) Functional Multigenomic Screening of Human-Associated Bacteria for NF-kappaB-Inducing Bioactive Effectors.
PMID	PMID.26678048	16	48	9606	9606.ENSP00000216797,9606.ENSP00000222553,9606.ENSP00000225831,9606.ENSP00000226574,9606.ENSP00000245414,9606.ENSP00000263341,9606.ENSP00000263464,9606.ENSP00000264832,9606.ENSP00000275015,9606.ENSP00000359497,9606.ENSP00000359504,9606.ENSP00000384212,9606.ENSP00000385675,9606.ENSP00000427279,9606.ENSP00000432218,9606.ENSP00000481570	NFKBIA,NAMPT,CCL2,NFKB1,IRF1,IL1B,BIRC3,ICAM1,NFKBIE,GBP2,GBP1,IL18BP,IL6,CXCL2,IL32,TNFAIP3	1.94e-18	3.08e-14	(2015) The Inflammatory Transcription Factors NFKB, STAT1 and STAT3 Drive Age-Associated Transcriptional Changes in the Human Kidney.
PMID	PMID.21067579	22	147	9606	9606.ENSP00000216797,9606.ENSP00000221452,9606.ENSP00000225474,9606.ENSP00000225831,9606.ENSP00000226574,9606.ENSP00000245185,9606.ENSP00000259206,9606.ENSP00000260010,9606.ENSP00000263339,9606.ENSP00000263341,9606.ENSP00000264832,9606.ENSP00000275015,9606.ENSP00000295927,9606.ENSP00000299663,9606.ENSP00000325663,9606.ENSP00000331736,9606.ENSP00000384212,9606.ENSP00000385675,9606.ENSP00000427279,…	NFKBIA,RELB,CSF3,CCL2,NFKB1,MT2A,IL1RN,TLR2,IL1A,IL1B,ICAM1,NFKBIE,PTX3,CLEC4E,NFKBIZ,SELE,IL18BP,IL6,CXCL2,C1R,SOD2,CNKSR3	2.18e-18	3.38e-14	(2010) Transcriptomic analysis of the temporal host response to skin infestation with the ectoparasitic mite Psoroptes ovis.
PMID	PMID.17324256	22	147	9606	9606.ENSP00000216797,9606.ENSP00000220751,9606.ENSP00000225474,9606.ENSP00000225831,9606.ENSP00000226574,9606.ENSP00000245414,9606.ENSP00000259206,9606.ENSP00000263341,9606.ENSP00000263464,9606.ENSP00000264832,9606.ENSP00000275015,9606.ENSP00000294728,9606.ENSP00000317891,9606.ENSP00000331736,9606.ENSP00000344260,9606.ENSP00000351671,9606.ENSP00000359497,9606.ENSP00000359504,9606.ENSP00000385675,…	NFKBIA,RIPK2,CSF3,CCL2,NFKB1,IRF1,IL1RN,IL1B,BIRC3,ICAM1,NFKBIE,VCAM1,TNIP1,SELE,GALNT15,CCL20,GBP2,GBP1,IL6,CXCL2,SOD2,TNFAIP3	2.18e-18	3.38e-14	(2007) Temporal dynamics of gene expression in the lung in a baboon model of E. coli sepsis.
PMID	PMID.31710624	18	76	9606	9606.ENSP00000216797,9606.ENSP00000225831,9606.ENSP00000258534,9606.ENSP00000260356,9606.ENSP00000263464,9606.ENSP00000264144,9606.ENSP00000295522,9606.ENSP00000296027,9606.ENSP00000317891,9606.ENSP00000351671,9606.ENSP00000358983,9606.ENSP00000379110,9606.ENSP00000385675,9606.ENSP00000392025,9606.ENSP00000427279,9606.ENSP00000432218,9606.ENSP00000446252,9606.ENSP00000481570	NFKBIA,CCL2,DRAM1,THBS1,BIRC3,LAMC2,CLDN1,CXCL5,TNIP1,CCL20,NFKB2,CXCL1,IL6,CYLD,CXCL2,IL32,SOD2,TNFAIP3	2.39e-18	3.54e-14	(2019) The CSF-1-receptor inhibitor, JNJ-40346527 (PRV-6527), reduced inflammatory macrophage recruitment to the intestinal mucosa and suppressed murine T cell mediated colitis.
PMID	PMID.23552603	18	80	9606	9606.ENSP00000216797,9606.ENSP00000225831,9606.ENSP00000226317,9606.ENSP00000241261,9606.ENSP00000259874,9606.ENSP00000263341,9606.ENSP00000263464,9606.ENSP00000264832,9606.ENSP00000294728,9606.ENSP00000296026,9606.ENSP00000296027,9606.ENSP00000331736,9606.ENSP00000346697,9606.ENSP00000351671,9606.ENSP00000376943,9606.ENSP00000379110,9606.ENSP00000385675,9606.ENSP00000427279	NFKBIA,CCL2,CXCL6,TNFSF10,IER3,IL1B,BIRC3,ICAM1,VCAM1,CXCL3,CXCL5,SELE,BMF,CCL20,BCL2L11,CXCL1,IL6,CXCL2	5.28e-18	7.63e-14	(2012) COX-2PGE2: molecular ambassadors of Kaposi's sarcoma-associated herpes virus oncoprotein-v-FLIP.
PMID	PMID.28849204	16	52	9606	9606.ENSP00000221452,9606.ENSP00000225831,9606.ENSP00000240100,9606.ENSP00000252809,9606.ENSP00000259874,9606.ENSP00000263339,9606.ENSP00000263341,9606.ENSP00000265087,9606.ENSP00000266671,9606.ENSP00000295522,9606.ENSP00000296585,9606.ENSP00000296861,9606.ENSP00000351671,9606.ENSP00000379110,9606.ENSP00000385675,9606.ENSP00000481570	RELB,CCL2,DUSP4,GDF15,IER3,IL1A,IL1B,STC2,PHLDA1,CLDN1,ITGA2,TNFRSF21,CCL20,CXCL1,IL6,TNFAIP3	5.63e-18	7.96e-14	(2017) Comprehensive bioinformatics analysis of the mRNA profile of PLCE1 knockdown in esophageal squamous cell carcinoma.
PMID	PMID.26393920	19	97	9606	9606.ENSP00000216797,9606.ENSP00000220751,9606.ENSP00000225831,9606.ENSP00000226317,9606.ENSP00000243347,9606.ENSP00000245907,9606.ENSP00000256458,9606.ENSP00000257570,9606.ENSP00000259206,9606.ENSP00000260010,9606.ENSP00000260356,9606.ENSP00000263341,9606.ENSP00000263642,9606.ENSP00000351671,9606.ENSP00000369213,9606.ENSP00000385675,9606.ENSP00000395590,9606.ENSP00000427279,9606.ENSP00000438615	NFKBIA,RIPK2,CCL2,CXCL6,TNFAIP6,C3,IRAK2,OASL,IL1RN,TLR2,THBS1,IL1B,IFIH1,CCL20,DDX58,IL6,IFI35,CXCL2,C1R	5.89e-18	8.15e-14	(2015) Transcriptomic and Epigenetic Profiling of the Lung of Influenza-Infected Pigs: A Comparison of Different Birth Weight and Susceptibility Groups.
PMID	PMID.31910882	15	41	9606	9606.ENSP00000221452,9606.ENSP00000225831,9606.ENSP00000226574,9606.ENSP00000241261,9606.ENSP00000245414,9606.ENSP00000263339,9606.ENSP00000263341,9606.ENSP00000263642,9606.ENSP00000296026,9606.ENSP00000351671,9606.ENSP00000359490,9606.ENSP00000360883,9606.ENSP00000360891,9606.ENSP00000379110,9606.ENSP00000385675	RELB,CCL2,NFKB1,TNFSF10,IRF1,IL1A,IL1B,IFIH1,CXCL3,CCL20,GBP4,IFIT3,IFIT2,CXCL1,IL6	7.35e-18	9.96e-14	(2020) Epigenetic regulation of IFITM1 expression in lipopolysaccharide-stimulated human mesenchymal stromal cells.
PMID	PMID.24307174	12	15	9606	9606.ENSP00000225831,9606.ENSP00000226317,9606.ENSP00000263339,9606.ENSP00000263341,9606.ENSP00000264832,9606.ENSP00000294728,9606.ENSP00000296026,9606.ENSP00000331736,9606.ENSP00000351671,9606.ENSP00000379110,9606.ENSP00000385675,9606.ENSP00000427279	CCL2,CXCL6,IL1A,IL1B,ICAM1,VCAM1,CXCL3,SELE,CCL20,CXCL1,IL6,CXCL2	1.18e-17	1.57e-13	(2014) Lipopolysaccharide activates Toll-like receptor 4 (TLR4)-mediated NF-kappaB signaling pathway and proinflammatory response in human pericytes.
PMID	PMID.26582142	18	86	9606	9606.ENSP00000006053,9606.ENSP00000221452,9606.ENSP00000225831,9606.ENSP00000245414,9606.ENSP00000257570,9606.ENSP00000259206,9606.ENSP00000263339,9606.ENSP00000263341,9606.ENSP00000263642,9606.ENSP00000296026,9606.ENSP00000317891,9606.ENSP00000360883,9606.ENSP00000360891,9606.ENSP00000379110,9606.ENSP00000384212,9606.ENSP00000385675,9606.ENSP00000395590,9606.ENSP00000481570	CX3CL1,RELB,CCL2,IRF1,OASL,IL1RN,IL1A,IL1B,IFIH1,CXCL3,TNIP1,IFIT3,IFIT2,CXCL1,IL18BP,IL6,IFI35,TNFAIP3	1.62e-17	2.1e-13	(2015) Dual transcriptome sequencing reveals resistance of TLR4 ligand-activated bone marrow-derived macrophages to inflammation mediated by the BET inhibitor JQ1.
PMID	PMID.26539667	14	34	9606	9606.ENSP00000222553,9606.ENSP00000225831,9606.ENSP00000226574,9606.ENSP00000260010,9606.ENSP00000263341,9606.ENSP00000264832,9606.ENSP00000295927,9606.ENSP00000296027,9606.ENSP00000331736,9606.ENSP00000358983,9606.ENSP00000379110,9606.ENSP00000385675,9606.ENSP00000427279,9606.ENSP00000446252	NAMPT,CCL2,NFKB1,TLR2,IL1B,ICAM1,PTX3,CXCL5,SELE,NFKB2,CXCL1,IL6,CXCL2,SOD2	2.48e-17	3.15e-13	(2016) Umbilical cord gene expression reveals the molecular architecture of the fetal inflammatory response in extremely preterm newborns.
PMID	PMID.31600201	15	46	9606	9606.ENSP00000225831,9606.ENSP00000245414,9606.ENSP00000257570,9606.ENSP00000260010,9606.ENSP00000263339,9606.ENSP00000263341,9606.ENSP00000359488,9606.ENSP00000359490,9606.ENSP00000359497,9606.ENSP00000359504,9606.ENSP00000359512,9606.ENSP00000369213,9606.ENSP00000369299,9606.ENSP00000385675,9606.ENSP00000395590	CCL2,IRF1,OASL,TLR2,IL1A,IL1B,GBP5,GBP4,GBP2,GBP1,GBP3,DDX58,TRIM22,IL6,IFI35	3.05e-17	3.81e-13	(2019) Identification of a systemic interferon-Gamma inducible antimicrobial gene signature in leprosy patients undergoing reversal reaction.
PMID	PMID.28750197	15	46	9606	9606.ENSP00000245414,9606.ENSP00000256458,9606.ENSP00000257570,9606.ENSP00000259206,9606.ENSP00000260010,9606.ENSP00000263339,9606.ENSP00000263341,9606.ENSP00000263642,9606.ENSP00000325663,9606.ENSP00000360883,9606.ENSP00000369213,9606.ENSP00000379110,9606.ENSP00000385675,9606.ENSP00000427279,9606.ENSP00000481570	IRF1,IRAK2,OASL,IL1RN,TLR2,IL1A,IL1B,IFIH1,NFKBIZ,IFIT3,DDX58,CXCL1,IL6,CXCL2,TNFAIP3	3.05e-17	3.81e-13	(2017) Systematic Investigation of Multi-TLR Sensing Identifies Regulators of Sustained Gene Activation in Macrophages.
PMID	PMID.29850627	17	75	9606	9606.ENSP00000225831,9606.ENSP00000259874,9606.ENSP00000260010,9606.ENSP00000260356,9606.ENSP00000263339,9606.ENSP00000263341,9606.ENSP00000264832,9606.ENSP00000296026,9606.ENSP00000313391,9606.ENSP00000339328,9606.ENSP00000351671,9606.ENSP00000360891,9606.ENSP00000361850,9606.ENSP00000376943,9606.ENSP00000379110,9606.ENSP00000385675,9606.ENSP00000427279	CCL2,IER3,TLR2,THBS1,IL1A,IL1B,ICAM1,CXCL3,DAB2,PLAUR,CCL20,IFIT2,PLAU,BCL2L11,CXCL1,IL6,CXCL2	4.09e-17	4.91e-13	(2018) Gene Expression Profiling in Behcet's Disease Indicates an Autoimmune Component in the Pathogenesis of the Disease and Opens New Avenues for Targeted Therapy.
PMID	PMID.26510639	22	172	9606	9606.ENSP00000216797,9606.ENSP00000220751,9606.ENSP00000221452,9606.ENSP00000225831,9606.ENSP00000245414,9606.ENSP00000259206,9606.ENSP00000260010,9606.ENSP00000263339,9606.ENSP00000263341,9606.ENSP00000263642,9606.ENSP00000275015,9606.ENSP00000296026,9606.ENSP00000296027,9606.ENSP00000296585,9606.ENSP00000325663,9606.ENSP00000331736,9606.ENSP00000334928,9606.ENSP00000358983,9606.ENSP00000369213,…	NFKBIA,RIPK2,RELB,CCL2,IRF1,IL1RN,TLR2,IL1A,IL1B,IFIH1,NFKBIE,CXCL3,CXCL5,ITGA2,NFKBIZ,SELE,PTPRB,NFKB2,DDX58,CXCL1,IL6,CXCL2	4.42e-17	5.21e-13	(2015) Prior infection with Type A Francisella tularensis antagonizes the pulmonary transcriptional response to an aerosolized Toll-like receptor 4 agonist.
PMID	PMID.24949855	20	130	9606	9606.ENSP00000216797,9606.ENSP00000221452,9606.ENSP00000226574,9606.ENSP00000228280,9606.ENSP00000245414,9606.ENSP00000260010,9606.ENSP00000262461,9606.ENSP00000263341,9606.ENSP00000267569,9606.ENSP00000296026,9606.ENSP00000322775,9606.ENSP00000338157,9606.ENSP00000362994,9606.ENSP00000365280,9606.ENSP00000369213,9606.ENSP00000376943,9606.ENSP00000385675,9606.ENSP00000391676,9606.ENSP00000446252,…	NFKBIA,RELB,NFKB1,KITLG,IRF1,TLR2,SLC12A2,IL1B,JDP2,CXCL3,RHBDF2,ZBTB16,TRAF1,ID1,DDX58,BCL2L11,IL6,JAK3,SOD2,TNFAIP3	5.06e-17	5.85e-13	(2014) A systems biology approach to the analysis of subset-specific responses to lipopolysaccharide in dendritic cells.
PMID	PMID.29253007	15	48	9606	9606.ENSP00000004531,9606.ENSP00000006053,9606.ENSP00000225474,9606.ENSP00000225831,9606.ENSP00000245414,9606.ENSP00000256458,9606.ENSP00000263339,9606.ENSP00000263341,9606.ENSP00000264832,9606.ENSP00000296026,9606.ENSP00000296027,9606.ENSP00000351671,9606.ENSP00000379110,9606.ENSP00000385675,9606.ENSP00000427279	SLC7A2,CX3CL1,CSF3,CCL2,IRF1,IRAK2,IL1A,IL1B,ICAM1,CXCL3,CXCL5,CCL20,CXCL1,IL6,CXCL2	5.2e-17	5.9e-13	(2017) Hypertonic saline attenuates the cytokine-induced pro-inflammatory signature in primary human lung epithelia.
PMID	PMID.16817975	12	18	9606	9606.ENSP00000216797,9606.ENSP00000225831,9606.ENSP00000226574,9606.ENSP00000245414,9606.ENSP00000296026,9606.ENSP00000296027,9606.ENSP00000351671,9606.ENSP00000358983,9606.ENSP00000379110,9606.ENSP00000385675,9606.ENSP00000427279,9606.ENSP00000481570	NFKBIA,CCL2,NFKB1,IRF1,CXCL3,CXCL5,CCL20,NFKB2,CXCL1,IL6,CXCL2,TNFAIP3	5.73e-17	6.4e-13	(2006) Genome-wide prediction of transcriptional regulatory elements of human promoters using gene expression and promoter analysis data.
PMID	PMID.29927962	15	50	9606	9606.ENSP00000225474,9606.ENSP00000225831,9606.ENSP00000243347,9606.ENSP00000256458,9606.ENSP00000260010,9606.ENSP00000263341,9606.ENSP00000265896,9606.ENSP00000296026,9606.ENSP00000322706,9606.ENSP00000351671,9606.ENSP00000361850,9606.ENSP00000379110,9606.ENSP00000385675,9606.ENSP00000438615,9606.ENSP00000446252	CSF3,CCL2,TNFAIP6,IRAK2,TLR2,IL1B,SQLE,CXCL3,HMGCS1,CCL20,PLAU,CXCL1,IL6,C1R,SOD2	8.67e-17	9.51e-13	(2018) Genome wide analysis of TLR12- and TLR4-activated SZ95 sebocytes reveals a complex immune-competence and identifies serum amyloid A as a marker for activated sebaceous glands.
PMID	PMID.20160661	16	64	9606	9606.ENSP00000226574,9606.ENSP00000245414,9606.ENSP00000245907,9606.ENSP00000256458,9606.ENSP00000260010,9606.ENSP00000263339,9606.ENSP00000263341,9606.ENSP00000264832,9606.ENSP00000294728,9606.ENSP00000296026,9606.ENSP00000359497,9606.ENSP00000360883,9606.ENSP00000362994,9606.ENSP00000385675,9606.ENSP00000427279,9606.ENSP00000437621	NFKB1,IRF1,C3,IRAK2,TLR2,IL1A,IL1B,ICAM1,VCAM1,CXCL3,GBP2,IFIT3,TRAF1,IL6,CXCL2,HMGA2	9.29e-17	1e-12	(2010) The proteasome regulates bacterial CpG DNA-induced signaling pathways in murine macrophages.
PMID	PMID.25128762	20	135	9606	9606.ENSP00000225831,9606.ENSP00000241261,9606.ENSP00000245414,9606.ENSP00000246006,9606.ENSP00000251642,9606.ENSP00000257570,9606.ENSP00000260010,9606.ENSP00000260356,9606.ENSP00000263642,9606.ENSP00000264346,9606.ENSP00000286298,9606.ENSP00000351671,9606.ENSP00000360883,9606.ENSP00000369213,9606.ENSP00000369299,9606.ENSP00000379110,9606.ENSP00000384212,9606.ENSP00000395590,9606.ENSP00000438615,…	CCL2,TNFSF10,IRF1,CD93,DHX58,OASL,TLR2,THBS1,IFIH1,HERC6,SLC26A2,CCL20,IFIT3,DDX58,TRIM22,CXCL1,IL18BP,IFI35,C1R,PLA2G4C	9.76e-17	1.04e-12	(2014) Virus-host mucosal interactions during early SIV rectal transmission.
PMID	PMID.24349206	23	205	9606	9606.ENSP00000216797,9606.ENSP00000225831,9606.ENSP00000226574,9606.ENSP00000243347,9606.ENSP00000245414,9606.ENSP00000256458,9606.ENSP00000259206,9606.ENSP00000260010,9606.ENSP00000263339,9606.ENSP00000263341,9606.ENSP00000264832,9606.ENSP00000287814,9606.ENSP00000288840,9606.ENSP00000294728,9606.ENSP00000296026,9606.ENSP00000296027,9606.ENSP00000325663,9606.ENSP00000351671,9606.ENSP00000358983,…	NFKBIA,CCL2,NFKB1,TNFAIP6,IRF1,IRAK2,IL1RN,TLR2,IL1A,IL1B,ICAM1,TIMP4,SMAD6,VCAM1,CXCL3,CXCL5,NFKBIZ,CCL20,NFKB2,CXCL1,IL6,DYSF,CXCL2	1.13e-16	1.18e-12	(2013) The transcriptomic response of rat hepatic stellate cells to endotoxin: implications for hepatic inflammation and immune regulation.
PMID	PMID.30781519	16	66	9606	9606.ENSP00000220751,9606.ENSP00000225831,9606.ENSP00000241261,9606.ENSP00000245414,9606.ENSP00000251642,9606.ENSP00000260010,9606.ENSP00000263642,9606.ENSP00000296026,9606.ENSP00000296027,9606.ENSP00000359488,9606.ENSP00000360883,9606.ENSP00000369213,9606.ENSP00000379110,9606.ENSP00000385675,9606.ENSP00000395590,9606.ENSP00000427279	RIPK2,CCL2,TNFSF10,IRF1,DHX58,TLR2,IFIH1,CXCL3,CXCL5,GBP5,IFIT3,DDX58,CXCL1,IL6,IFI35,CXCL2	1.41e-16	1.45e-12	(2019) Integrated MicroRNA and mRNA Profiling in Zika Virus-Infected Neurons.
PMID	PMID.17935622	21	161	9606	9606.ENSP00000220751,9606.ENSP00000225831,9606.ENSP00000226574,9606.ENSP00000241261,9606.ENSP00000245414,9606.ENSP00000251642,9606.ENSP00000263341,9606.ENSP00000263464,9606.ENSP00000263642,9606.ENSP00000265598,9606.ENSP00000296026,9606.ENSP00000358983,9606.ENSP00000359504,9606.ENSP00000360883,9606.ENSP00000360891,9606.ENSP00000379110,9606.ENSP00000385675,9606.ENSP00000395590,9606.ENSP00000398632,…	RIPK2,CCL2,NFKB1,TNFSF10,IRF1,DHX58,IL1B,BIRC3,IFIH1,LAMP3,CXCL3,NFKB2,GBP1,IFIT3,IFIT2,CXCL1,IL6,IFI35,CD44,CXCL2,TNFAIP3	1.65e-16	1.67e-12	(2007) Transcriptional networks in plasmacytoid dendritic cells stimulated with synthetic TLR 7 agonists.
PMID	PMID.23358229	17	83	9606	9606.ENSP00000225474,9606.ENSP00000225831,9606.ENSP00000226574,9606.ENSP00000256495,9606.ENSP00000260010,9606.ENSP00000263339,9606.ENSP00000263341,9606.ENSP00000265361,9606.ENSP00000265362,9606.ENSP00000266671,9606.ENSP00000275015,9606.ENSP00000284136,9606.ENSP00000296026,9606.ENSP00000357909,9606.ENSP00000359504,9606.ENSP00000359512,9606.ENSP00000385675	CSF3,CCL2,NFKB1,BHLHE40,TLR2,IL1A,IL1B,SEMA3C,SEMA3A,PHLDA1,NFKBIE,SEMA3D,CXCL3,SEMA6C,GBP1,GBP3,IL6	1.8e-16	1.79e-12	(2013) Non-apoptotic toxicity of Pseudomonas aeruginosa toward murine cells.
PMID	PMID.31205449	15	54	9606	9606.ENSP00000006053,9606.ENSP00000225474,9606.ENSP00000225831,9606.ENSP00000226317,9606.ENSP00000260010,9606.ENSP00000263339,9606.ENSP00000263341,9606.ENSP00000294728,9606.ENSP00000296026,9606.ENSP00000331736,9606.ENSP00000351671,9606.ENSP00000379110,9606.ENSP00000385675,9606.ENSP00000398632,9606.ENSP00000427279	CX3CL1,CSF3,CCL2,CXCL6,TLR2,IL1A,IL1B,VCAM1,CXCL3,SELE,CCL20,CXCL1,IL6,CD44,CXCL2	2.29e-16	2.24e-12	(2019) Role and Molecular Mechanisms of Pericytes in Regulation of Leukocyte Diapedesis in Inflamed Tissues.
PMID	PMID.28558796	16	69	9606	9606.ENSP00000225474,9606.ENSP00000225831,9606.ENSP00000245414,9606.ENSP00000251642,9606.ENSP00000259030,9606.ENSP00000263339,9606.ENSP00000263341,9606.ENSP00000263642,9606.ENSP00000296027,9606.ENSP00000359497,9606.ENSP00000359504,9606.ENSP00000359512,9606.ENSP00000362994,9606.ENSP00000369213,9606.ENSP00000385675,9606.ENSP00000427279	CSF3,CCL2,IRF1,DHX58,RTP4,IL1A,IL1B,IFIH1,CXCL5,GBP2,GBP1,GBP3,TRAF1,DDX58,IL6,CXCL2	2.6e-16	2.5e-12	(2017) Systems-based approach to examine the cytokine responses in primary mouse lung macrophages infected with low pathogenic avian Influenza virus circulating in South East Asia.
PMID	PMID.20374638	13	31	9606	9606.ENSP00000216797,9606.ENSP00000225831,9606.ENSP00000259874,9606.ENSP00000260010,9606.ENSP00000263341,9606.ENSP00000294728,9606.ENSP00000325663,9606.ENSP00000362179,9606.ENSP00000379110,9606.ENSP00000385675,9606.ENSP00000398632,9606.ENSP00000427279,9606.ENSP00000481570	NFKBIA,CCL2,IER3,TLR2,IL1B,VCAM1,NFKBIZ,ZC3H12A,CXCL1,IL6,CD44,CXCL2,TNFAIP3	2.91e-16	2.76e-12	(2010) Genome-wide comparison between IL-17 and combined TNF-alphaIL-17 induced genes in primary murine hepatocytes.
PMID	PMID.22972474	17	86	9606	9606.ENSP00000225831,9606.ENSP00000242208,9606.ENSP00000245414,9606.ENSP00000257570,9606.ENSP00000259206,9606.ENSP00000260010,9606.ENSP00000263339,9606.ENSP00000263341,9606.ENSP00000296026,9606.ENSP00000296027,9606.ENSP00000339328,9606.ENSP00000344479,9606.ENSP00000375795,9606.ENSP00000379110,9606.ENSP00000385675,9606.ENSP00000427279,9606.ENSP00000432218	CCL2,INHBA,IRF1,OASL,IL1RN,TLR2,IL1A,IL1B,CXCL3,CXCL5,PLAUR,NR4A2,IL24,CXCL1,IL6,CXCL2,IL32	3.03e-16	2.84e-12	(2012) Transcriptional signatures as a disease-specific and predictive inflammatory biomarker for type 1 diabetes.
PMID	PMID.29123522	17	87	9606	9606.ENSP00000216797,9606.ENSP00000225831,9606.ENSP00000243347,9606.ENSP00000245414,9606.ENSP00000251642,9606.ENSP00000256458,9606.ENSP00000257570,9606.ENSP00000260010,9606.ENSP00000260356,9606.ENSP00000263341,9606.ENSP00000263464,9606.ENSP00000264832,9606.ENSP00000359504,9606.ENSP00000385675,9606.ENSP00000419045,9606.ENSP00000446252,9606.ENSP00000481570	NFKBIA,CCL2,TNFAIP6,IRF1,DHX58,IRAK2,OASL,TLR2,THBS1,IL1B,BIRC3,ICAM1,GBP1,IL6,GCH1,SOD2,TNFAIP3	3.59e-16	3.31e-12	(2017) Transcriptome Analysis of Circulating Immune Cell Subsets Highlight the Role of Monocytes in Zaire Ebola Virus Makona Pathogenesis.
PMID	PMID.23671700	14	43	9606	9606.ENSP00000216797,9606.ENSP00000241261,9606.ENSP00000245414,9606.ENSP00000245907,9606.ENSP00000256458,9606.ENSP00000260010,9606.ENSP00000263642,9606.ENSP00000351671,9606.ENSP00000359497,9606.ENSP00000359504,9606.ENSP00000360891,9606.ENSP00000369213,9606.ENSP00000385675,9606.ENSP00000481570	NFKBIA,TNFSF10,IRF1,C3,IRAK2,TLR2,IFIH1,CCL20,GBP2,GBP1,IFIT2,DDX58,IL6,TNFAIP3	3.65e-16	3.32e-12	(2013) Analysis of antiviral response in human epithelial cells infected with hepatitis E virus.
PMID	PMID.22947142	14	43	9606	9606.ENSP00000221452,9606.ENSP00000225474,9606.ENSP00000225831,9606.ENSP00000241261,9606.ENSP00000245414,9606.ENSP00000263339,9606.ENSP00000264832,9606.ENSP00000296861,9606.ENSP00000331736,9606.ENSP00000358983,9606.ENSP00000362994,9606.ENSP00000385675,9606.ENSP00000446252,9606.ENSP00000481570	RELB,CSF3,CCL2,TNFSF10,IRF1,IL1A,ICAM1,TNFRSF21,SELE,NFKB2,TRAF1,IL6,SOD2,TNFAIP3	3.65e-16	3.32e-12	(2012) Microarray analysis revealing common and distinct functions of promyelocytic leukemia protein (PML) and tumor necrosis factor alpha (TNFAlfa) signaling in endothelial cells.
PMID	PMID.28899359	16	71	9606	9606.ENSP00000216797,9606.ENSP00000225474,9606.ENSP00000225831,9606.ENSP00000263339,9606.ENSP00000263341,9606.ENSP00000264832,9606.ENSP00000294728,9606.ENSP00000296026,9606.ENSP00000331736,9606.ENSP00000351671,9606.ENSP00000362994,9606.ENSP00000369213,9606.ENSP00000379110,9606.ENSP00000385675,9606.ENSP00000427279,9606.ENSP00000481570	NFKBIA,CSF3,CCL2,IL1A,IL1B,ICAM1,VCAM1,CXCL3,SELE,CCL20,TRAF1,DDX58,CXCL1,IL6,CXCL2,TNFAIP3	3.84e-16	3.39e-12	(2017) Transcript profiling of the immunological interactions between Actinobacillus pleuropneumoniae serotype 7 and the host by dual RNA-seq.
PMID	PMID.26447881	18	108	9606	9606.ENSP00000216797,9606.ENSP00000225831,9606.ENSP00000240100,9606.ENSP00000259206,9606.ENSP00000263341,9606.ENSP00000265361,9606.ENSP00000265362,9606.ENSP00000275015,9606.ENSP00000284136,9606.ENSP00000294728,9606.ENSP00000339328,9606.ENSP00000344479,9606.ENSP00000357909,9606.ENSP00000358983,9606.ENSP00000360966,9606.ENSP00000385675,9606.ENSP00000437621,9606.ENSP00000481570	NFKBIA,CCL2,DUSP4,IL1RN,IL1B,SEMA3C,SEMA3A,NFKBIE,SEMA3D,VCAM1,PLAUR,NR4A2,SEMA6C,NFKB2,SLC2A6,IL6,HMGA2,TNFAIP3	5.62e-16	4.9e-12	(2015) Tumor Necrosis Factor Alpha and Insulin-Like Growth Factor 1 Induced Modifications of the Gene Expression Kinetics of Differentiating Skeletal Muscle Cells.
PMID	PMID.29787599	14	45	9606	9606.ENSP00000006053,9606.ENSP00000216797,9606.ENSP00000225831,9606.ENSP00000260010,9606.ENSP00000264832,9606.ENSP00000351671,9606.ENSP00000359497,9606.ENSP00000367766,9606.ENSP00000379110,9606.ENSP00000382090,9606.ENSP00000385675,9606.ENSP00000427279,9606.ENSP00000438615,9606.ENSP00000446252	CX3CL1,NFKBIA,CCL2,TLR2,ICAM1,CCL20,GBP2,RPGR,CXCL1,CLDN14,IL6,CXCL2,C1R,SOD2	6.2e-16	5.33e-12	(2018) Pathological molecular mechanism of symptomatic late-onset Fuchs endothelial corneal dystrophy by bioinformatic analysis.
PMID	PMID.24610033	19	129	9606	9606.ENSP00000216797,9606.ENSP00000225474,9606.ENSP00000225831,9606.ENSP00000263339,9606.ENSP00000263341,9606.ENSP00000263923,9606.ENSP00000264832,9606.ENSP00000265361,9606.ENSP00000265362,9606.ENSP00000284136,9606.ENSP00000294728,9606.ENSP00000296026,9606.ENSP00000314897,9606.ENSP00000331736,9606.ENSP00000357909,9606.ENSP00000379110,9606.ENSP00000385675,9606.ENSP00000422464,9606.ENSP00000427279	NFKBIA,CSF3,CCL2,IL1A,IL1B,KDR,ICAM1,SEMA3C,SEMA3A,SEMA3D,VCAM1,CXCL3,ANGPT2,SELE,SEMA6C,CXCL1,IL6,PDGFC,CXCL2	6.49e-16	5.51e-12	(2014) Vascular endothelial growth factor signaling in hypoxia and inflammation.
PMID	PMID.22300531	16	74	9606	9606.ENSP00000225474,9606.ENSP00000225831,9606.ENSP00000257570,9606.ENSP00000263339,9606.ENSP00000263341,9606.ENSP00000263464,9606.ENSP00000263642,9606.ENSP00000296026,9606.ENSP00000339328,9606.ENSP00000360891,9606.ENSP00000361850,9606.ENSP00000375795,9606.ENSP00000385675,9606.ENSP00000408617,9606.ENSP00000446252,9606.ENSP00000481570	CSF3,CCL2,OASL,IL1A,IL1B,BIRC3,IFIH1,CXCL3,PLAUR,IFIT2,PLAU,IL24,IL6,HDAC9,SOD2,TNFAIP3	6.78e-16	5.68e-12	(2012) Differences in gene expression and cytokine production by crystalline vs. amorphous silica in human lung epithelial cells.
PMID	PMID.21915322	17	91	9606	9606.ENSP00000216797,9606.ENSP00000221452,9606.ENSP00000225831,9606.ENSP00000226574,9606.ENSP00000245414,9606.ENSP00000263339,9606.ENSP00000263341,9606.ENSP00000264832,9606.ENSP00000275015,9606.ENSP00000295927,9606.ENSP00000325663,9606.ENSP00000331736,9606.ENSP00000360231,9606.ENSP00000376436,9606.ENSP00000385675,9606.ENSP00000436126,9606.ENSP00000446252	NFKBIA,RELB,CCL2,NFKB1,IRF1,IL1A,IL1B,ICAM1,NFKBIE,PTX3,NFKBIZ,SELE,NFIA,ETS1,IL6,SAA2,SOD2	6.95e-16	5.75e-12	(2011) Host transcription factors in the immediate pro-inflammatory response to the parasitic mite Psoroptes ovis.
PMID	PMID.18205922	15	59	9606	9606.ENSP00000220751,9606.ENSP00000225474,9606.ENSP00000225831,9606.ENSP00000257570,9606.ENSP00000259206,9606.ENSP00000260010,9606.ENSP00000260356,9606.ENSP00000263339,9606.ENSP00000263341,9606.ENSP00000264832,9606.ENSP00000294728,9606.ENSP00000296026,9606.ENSP00000351671,9606.ENSP00000379110,9606.ENSP00000385675	RIPK2,CSF3,CCL2,OASL,IL1RN,TLR2,THBS1,IL1A,IL1B,ICAM1,VCAM1,CXCL3,CCL20,CXCL1,IL6	7.05e-16	5.75e-12	(2008) Key regulatory molecules of cartilage destruction in rheumatoid arthritis: an in vitro study.
PMID	PMID.21110886	18	110	9606	9606.ENSP00000220809,9606.ENSP00000225474,9606.ENSP00000225831,9606.ENSP00000246006,9606.ENSP00000257570,9606.ENSP00000260010,9606.ENSP00000263341,9606.ENSP00000263464,9606.ENSP00000296026,9606.ENSP00000339328,9606.ENSP00000361850,9606.ENSP00000379110,9606.ENSP00000385675,9606.ENSP00000398632,9606.ENSP00000427279,9606.ENSP00000436126,9606.ENSP00000438615,9606.ENSP00000481570	PLAT,CSF3,CCL2,CD93,OASL,TLR2,IL1B,BIRC3,CXCL3,PLAUR,PLAU,CXCL1,IL6,CD44,CXCL2,SAA2,C1R,TNFAIP3	7.48e-16	6.03e-12	(2010) Genome wide transcriptome profiling of a murine acute melioidosis model reveals new insights into how Burkholderia pseudomallei overcomes host innate immunity.
PMID	PMID.22679495	13	34	9606	9606.ENSP00000216797,9606.ENSP00000225474,9606.ENSP00000225831,9606.ENSP00000226574,9606.ENSP00000263339,9606.ENSP00000263341,9606.ENSP00000263464,9606.ENSP00000275015,9606.ENSP00000325663,9606.ENSP00000351671,9606.ENSP00000358983,9606.ENSP00000385675,9606.ENSP00000481570	NFKBIA,CSF3,CCL2,NFKB1,IL1A,IL1B,BIRC3,NFKBIE,NFKBIZ,CCL20,NFKB2,IL6,TNFAIP3	7.67e-16	6.1e-12	(2012) Transcriptome kinetics of circulating neutrophils during human experimental endotoxemia.
PMID	PMID.21754991	13	34	9606	9606.ENSP00000216797,9606.ENSP00000221452,9606.ENSP00000225831,9606.ENSP00000263339,9606.ENSP00000263341,9606.ENSP00000264832,9606.ENSP00000294728,9606.ENSP00000331736,9606.ENSP00000358983,9606.ENSP00000365048,9606.ENSP00000379110,9606.ENSP00000385675,9606.ENSP00000481570	NFKBIA,RELB,CCL2,IL1A,IL1B,ICAM1,VCAM1,SELE,NFKB2,TNFSF13B,CXCL1,IL6,TNFAIP3	7.67e-16	6.1e-12	(2011) Similar NF-KB gene signatures in TNF-Alfa treated human endothelial cells and breast tumor biopsies.
PMID	PMID.15860229	12	24	9606	9606.ENSP00000228534,9606.ENSP00000243347,9606.ENSP00000257570,9606.ENSP00000263339,9606.ENSP00000263341,9606.ENSP00000264832,9606.ENSP00000296027,9606.ENSP00000351671,9606.ENSP00000360883,9606.ENSP00000360891,9606.ENSP00000385675,9606.ENSP00000446252	IL23A,TNFAIP6,OASL,IL1A,IL1B,ICAM1,CXCL5,CCL20,IFIT3,IFIT2,IL6,SOD2	7.87e-16	6.11e-12	(2005) Gene-inducing program of human dendritic cells in response to BCG cell-wall skeleton (CWS), which reflects adjuvancy required for tumor immunotherapy.
PMID	PMID.22624040	14	46	9606	9606.ENSP00000006053,9606.ENSP00000216797,9606.ENSP00000221452,9606.ENSP00000225831,9606.ENSP00000226574,9606.ENSP00000263464,9606.ENSP00000299759,9606.ENSP00000331736,9606.ENSP00000351671,9606.ENSP00000357981,9606.ENSP00000358983,9606.ENSP00000385675,9606.ENSP00000432218,9606.ENSP00000481570	CX3CL1,NFKBIA,RELB,CCL2,NFKB1,BIRC3,RRAD,SELE,CCL20,CTSS,NFKB2,IL6,IL32,TNFAIP3	8.01e-16	6.15e-12	(2012) A computational profiling of changes in gene expression and transcription factors induced by vFLIP K13 in primary effusion lymphoma.
PMID	PMID.28561798	16	76	9606	9606.ENSP00000216797,9606.ENSP00000221452,9606.ENSP00000225831,9606.ENSP00000226574,9606.ENSP00000228280,9606.ENSP00000263341,9606.ENSP00000264832,9606.ENSP00000275015,9606.ENSP00000294728,9606.ENSP00000325663,9606.ENSP00000358983,9606.ENSP00000362994,9606.ENSP00000365048,9606.ENSP00000385675,9606.ENSP00000392025,9606.ENSP00000481570	NFKBIA,RELB,CCL2,NFKB1,KITLG,IL1B,ICAM1,NFKBIE,VCAM1,NFKBIZ,NFKB2,TRAF1,TNFSF13B,IL6,CYLD,TNFAIP3	9.78e-16	7.41e-12	(2017) NF-KB in Hematological Malignancies.
PMID	PMID.28248992	16	76	9606	9606.ENSP00000225831,9606.ENSP00000241261,9606.ENSP00000243347,9606.ENSP00000245414,9606.ENSP00000259206,9606.ENSP00000263339,9606.ENSP00000263341,9606.ENSP00000264832,9606.ENSP00000359490,9606.ENSP00000359497,9606.ENSP00000359504,9606.ENSP00000360883,9606.ENSP00000360891,9606.ENSP00000379110,9606.ENSP00000385675,9606.ENSP00000432218	CCL2,TNFSF10,TNFAIP6,IRF1,IL1RN,IL1A,IL1B,ICAM1,GBP4,GBP2,GBP1,IFIT3,IFIT2,CXCL1,IL6,IL32	9.78e-16	7.41e-12	(2017) Altered regulation and expression of genes by BET family of proteins in COPD patients.
PMID	PMID.22147767	16	76	9606	9606.ENSP00000225831,9606.ENSP00000241261,9606.ENSP00000245907,9606.ENSP00000259206,9606.ENSP00000263339,9606.ENSP00000263341,9606.ENSP00000263642,9606.ENSP00000296027,9606.ENSP00000296861,9606.ENSP00000351671,9606.ENSP00000365048,9606.ENSP00000369213,9606.ENSP00000379110,9606.ENSP00000385675,9606.ENSP00000446252,9606.ENSP00000472474	CCL2,TNFSF10,C3,IL1RN,IL1A,IL1B,IFIH1,CXCL5,TNFRSF21,CCL20,TNFSF13B,DDX58,CXCL1,IL6,SOD2,IL4I1	9.78e-16	7.41e-12	(2012) Plasmacytoid dendritic cells and C1q differentially regulate inflammatory gene induction by lupus immune complexes.
PMID	PMID.24163129	14	47	9606	9606.ENSP00000216797,9606.ENSP00000221452,9606.ENSP00000226574,9606.ENSP00000259874,9606.ENSP00000263341,9606.ENSP00000263464,9606.ENSP00000275015,9606.ENSP00000331736,9606.ENSP00000351671,9606.ENSP00000358983,9606.ENSP00000379110,9606.ENSP00000385675,9606.ENSP00000392025,9606.ENSP00000481570	NFKBIA,RELB,NFKB1,IER3,IL1B,BIRC3,NFKBIE,SELE,CCL20,NFKB2,CXCL1,IL6,CYLD,TNFAIP3	1.03e-15	7.54e-12	(2014) Coregulation and modulation of NFKB-related genes in celiac disease: uncovered aspects of gut mucosal inflammation.
PMID	PMID.23690962	13	35	9606	9606.ENSP00000216797,9606.ENSP00000259206,9606.ENSP00000260010,9606.ENSP00000263339,9606.ENSP00000263341,9606.ENSP00000263464,9606.ENSP00000296026,9606.ENSP00000351671,9606.ENSP00000359497,9606.ENSP00000361850,9606.ENSP00000385675,9606.ENSP00000427279,9606.ENSP00000481570	NFKBIA,IL1RN,TLR2,IL1A,IL1B,BIRC3,CXCL3,CCL20,GBP2,PLAU,IL6,CXCL2,TNFAIP3	1.04e-15	7.54e-12	(2013) Age-related changes following in vitro stimulation with Rhodococcus equi of peripheral blood leukocytes from neonatal foals.
PMID	PMID.17534423	15	61	9606	9606.ENSP00000006053,9606.ENSP00000216797,9606.ENSP00000221452,9606.ENSP00000225831,9606.ENSP00000228280,9606.ENSP00000264832,9606.ENSP00000265896,9606.ENSP00000294728,9606.ENSP00000296026,9606.ENSP00000331736,9606.ENSP00000351671,9606.ENSP00000379110,9606.ENSP00000427279,9606.ENSP00000446252,9606.ENSP00000472546	CX3CL1,NFKBIA,RELB,CCL2,KITLG,ICAM1,SQLE,VCAM1,CXCL3,SELE,CCL20,CXCL1,CXCL2,SOD2,PLA2G4C	1.08e-15	7.71e-12	(2007) Endothelial cells' activation and apoptosis induced by a subset of antibodies against human cytomegalovirus: relevance to the pathogenesis of atherosclerosis.
PMID	PMID.15642130	15	61	9606	9606.ENSP00000216797,9606.ENSP00000225831,9606.ENSP00000226317,9606.ENSP00000259206,9606.ENSP00000263339,9606.ENSP00000263341,9606.ENSP00000264832,9606.ENSP00000294728,9606.ENSP00000331736,9606.ENSP00000339328,9606.ENSP00000351671,9606.ENSP00000361850,9606.ENSP00000385675,9606.ENSP00000398632,9606.ENSP00000427279	NFKBIA,CCL2,CXCL6,IL1RN,IL1A,IL1B,ICAM1,VCAM1,SELE,PLAUR,CCL20,PLAU,IL6,CD44,CXCL2	1.08e-15	7.71e-12	(2005) Gene expression profiles in the rat streptococcal cell wall-induced arthritis model identified using microarray analysis.
PMID	PMID.28963466	13	36	9606	9606.ENSP00000216797,9606.ENSP00000221452,9606.ENSP00000225831,9606.ENSP00000226574,9606.ENSP00000263341,9606.ENSP00000264832,9606.ENSP00000275015,9606.ENSP00000294728,9606.ENSP00000296027,9606.ENSP00000351671,9606.ENSP00000358983,9606.ENSP00000379110,9606.ENSP00000385675	NFKBIA,RELB,CCL2,NFKB1,IL1B,ICAM1,NFKBIE,VCAM1,CXCL5,CCL20,NFKB2,CXCL1,IL6	1.41e-15	9.84e-12	(2017) Cytokine-induced autophagy promotes long-term VCAM-1 but not ICAM-1 expression by degrading late-phase IKBAlfa.
PMID	PMID.19723087	13	36	9606	9606.ENSP00000216797,9606.ENSP00000221452,9606.ENSP00000225474,9606.ENSP00000225831,9606.ENSP00000226574,9606.ENSP00000241261,9606.ENSP00000256458,9606.ENSP00000260010,9606.ENSP00000263339,9606.ENSP00000263341,9606.ENSP00000264832,9606.ENSP00000358983,9606.ENSP00000385675	NFKBIA,RELB,CSF3,CCL2,NFKB1,TNFSF10,IRAK2,TLR2,IL1A,IL1B,ICAM1,NFKB2,IL6	1.41e-15	9.84e-12	(2009) Effect of curcumin on nuclear factor kappaB signaling pathways in human chronic myelogenous K562 leukemia cells.
PMID	PMID.25101079	17	96	9606	9606.ENSP00000216797,9606.ENSP00000220751,9606.ENSP00000226574,9606.ENSP00000245414,9606.ENSP00000251642,9606.ENSP00000259206,9606.ENSP00000260010,9606.ENSP00000263339,9606.ENSP00000263341,9606.ENSP00000263464,9606.ENSP00000263642,9606.ENSP00000264832,9606.ENSP00000294728,9606.ENSP00000369213,9606.ENSP00000379110,9606.ENSP00000385675,9606.ENSP00000427279	NFKBIA,RIPK2,NFKB1,IRF1,DHX58,IL1RN,TLR2,IL1A,IL1B,BIRC3,IFIH1,ICAM1,VCAM1,DDX58,CXCL1,IL6,CXCL2	1.53e-15	1.05e-11	(2014) Pattern-recognition receptors and gastric cancer.
PMID	PMID.28662718	12	26	9606	9606.ENSP00000216797,9606.ENSP00000221452,9606.ENSP00000225831,9606.ENSP00000226574,9606.ENSP00000263339,9606.ENSP00000263341,9606.ENSP00000317891,9606.ENSP00000358983,9606.ENSP00000362994,9606.ENSP00000385675,9606.ENSP00000446252,9606.ENSP00000481570	NFKBIA,RELB,CCL2,NFKB1,IL1A,IL1B,TNIP1,NFKB2,TRAF1,IL6,SOD2,TNFAIP3	1.67e-15	1.13e-11	(2017) Thrombin-induced, TNFR-dependent miR-181c downregulation promotes MLL1 and NF-KB target gene expression in human microglia.
PMID	PMID.31138743	18	116	9606	9606.ENSP00000216797,9606.ENSP00000221452,9606.ENSP00000225831,9606.ENSP00000243347,9606.ENSP00000245414,9606.ENSP00000256458,9606.ENSP00000257570,9606.ENSP00000260010,9606.ENSP00000263341,9606.ENSP00000263642,9606.ENSP00000263923,9606.ENSP00000264832,9606.ENSP00000360883,9606.ENSP00000360891,9606.ENSP00000365048,9606.ENSP00000369213,9606.ENSP00000369299,9606.ENSP00000472546	NFKBIA,RELB,CCL2,TNFAIP6,IRF1,IRAK2,OASL,TLR2,IL1B,IFIH1,KDR,ICAM1,IFIT3,IFIT2,TNFSF13B,DDX58,TRIM22,PLA2G4C	1.72e-15	1.15e-11	(2019) Antiviral Innate Responses Induced by VSV-EBOV Vaccination Contribute to Rapid Protection.
PMID	PMID.30406137	19	137	9606	9606.ENSP00000225831,9606.ENSP00000228280,9606.ENSP00000254958,9606.ENSP00000260010,9606.ENSP00000263341,9606.ENSP00000263923,9606.ENSP00000264832,9606.ENSP00000265361,9606.ENSP00000265362,9606.ENSP00000284136,9606.ENSP00000288840,9606.ENSP00000294728,9606.ENSP00000314897,9606.ENSP00000331736,9606.ENSP00000357909,9606.ENSP00000370812,9606.ENSP00000379110,9606.ENSP00000385675,9606.ENSP00000398632	CCL2,KITLG,JAG1,TLR2,IL1B,KDR,ICAM1,SEMA3C,SEMA3A,SEMA3D,SMAD6,VCAM1,ANGPT2,SELE,SEMA6C,ESM1,CXCL1,IL6,CD44	1.76e-15	1.16e-11	(2018) Cellular and Molecular Heterogeneity Associated with Vessel Formation Processes.
PMID	PMID.29736174	15	64	9606	9606.ENSP00000220809,9606.ENSP00000225474,9606.ENSP00000225831,9606.ENSP00000243347,9606.ENSP00000243457,9606.ENSP00000259206,9606.ENSP00000263339,9606.ENSP00000263341,9606.ENSP00000263923,9606.ENSP00000296027,9606.ENSP00000351671,9606.ENSP00000379110,9606.ENSP00000385675,9606.ENSP00000427279,9606.ENSP00000446252	PLAT,CSF3,CCL2,TNFAIP6,KCNJ2,IL1RN,IL1A,IL1B,KDR,CXCL5,CCL20,CXCL1,IL6,CXCL2,SOD2	1.99e-15	1.31e-11	(2018) Diabetic Ephrin-B2-Stimulated Peripheral Blood Mononuclear Cells Enhance Poststroke Recovery in Mice.
PMID	PMID.28355270	15	64	9606	9606.ENSP00000216797,9606.ENSP00000221452,9606.ENSP00000225831,9606.ENSP00000226574,9606.ENSP00000252809,9606.ENSP00000256495,9606.ENSP00000264832,9606.ENSP00000296027,9606.ENSP00000358983,9606.ENSP00000362179,9606.ENSP00000379110,9606.ENSP00000385675,9606.ENSP00000427279,9606.ENSP00000478591,9606.ENSP00000481570	NFKBIA,RELB,CCL2,NFKB1,GDF15,BHLHE40,ICAM1,CXCL5,NFKB2,ZC3H12A,CXCL1,IL6,CXCL2,NEURL3,TNFAIP3	1.99e-15	1.31e-11	(2017) The NF-KB-dependent and -independent transcriptome and chromatin landscapes of human coronavirus 229E-infected cells.
PMID	PMID.20001209	15	64	9606	9606.ENSP00000216797,9606.ENSP00000221452,9606.ENSP00000225831,9606.ENSP00000259874,9606.ENSP00000263341,9606.ENSP00000264832,9606.ENSP00000275015,9606.ENSP00000294728,9606.ENSP00000331736,9606.ENSP00000358983,9606.ENSP00000361850,9606.ENSP00000362994,9606.ENSP00000365048,9606.ENSP00000385675,9606.ENSP00000446252	NFKBIA,RELB,CCL2,IER3,IL1B,ICAM1,NFKBIE,VCAM1,SELE,NFKB2,PLAU,TRAF1,TNFSF13B,IL6,SOD2	1.99e-15	1.31e-11	(2010) The NF-kappaB activation pathways, emerging molecular targets for cancer prevention and therapy.
PMID	PMID.28684793	15	66	9606	9606.ENSP00000216797,9606.ENSP00000226574,9606.ENSP00000243347,9606.ENSP00000259206,9606.ENSP00000260010,9606.ENSP00000263339,9606.ENSP00000263341,9606.ENSP00000264832,9606.ENSP00000265074,9606.ENSP00000275015,9606.ENSP00000351671,9606.ENSP00000358983,9606.ENSP00000385675,9606.ENSP00000446252,9606.ENSP00000481570	NFKBIA,NFKB1,TNFAIP6,IL1RN,TLR2,IL1A,IL1B,ICAM1,NPR3,NFKBIE,CCL20,NFKB2,IL6,SOD2,TNFAIP3	2.96e-15	1.88e-11	(2017) Differentiating Staphylococcus aureus from Escherichia coli mastitis: S. aureus triggers unbalanced immune-dampening and host cell invasion immediately after udder infection.
Pfam	PF00048	8	44	9606	9606.ENSP00000006053,9606.ENSP00000225831,9606.ENSP00000226317,9606.ENSP00000296026,9606.ENSP00000296027,9606.ENSP00000351671,9606.ENSP00000379110,9606.ENSP00000427279	CX3CL1,CCL2,CXCL6,CXCL3,CXCL5,CCL20,CXCL1,CXCL2	4.72e-08	1.41e-05	Small cytokines (intecrine/chemokine), interleukin-8 like
Pfam	PF02841	5	9	9606	9606.ENSP00000359488,9606.ENSP00000359490,9606.ENSP00000359497,9606.ENSP00000359504,9606.ENSP00000359512	GBP5,GBP4,GBP2,GBP1,GBP3	1.83e-07	2.73e-05	Guanylate-binding protein, C-terminal domain
Pfam	PF02263	5	11	9606	9606.ENSP00000359488,9606.ENSP00000359490,9606.ENSP00000359497,9606.ENSP00000359504,9606.ENSP00000359512	GBP5,GBP4,GBP2,GBP1,GBP3	3.93e-07	3.9e-05	Guanylate-binding protein, N-terminal domain
Pfam	PF11648	3	3	9606	9606.ENSP00000251642,9606.ENSP00000263642,9606.ENSP00000369213	DHX58,IFIH1,DDX58	1.97e-05	0.0015	C-terminal domain of RIG-I
Pfam	PF00340	3	9	9606	9606.ENSP00000259206,9606.ENSP00000263339,9606.ENSP00000263341	IL1RN,IL1A,IL1B	0.00021	0.0123	Interleukin-1 / 18
Pfam	PF16179	3	10	9606	9606.ENSP00000221452,9606.ENSP00000226574,9606.ENSP00000358983	RELB,NFKB1,NFKB2	0.00027	0.0133	Rel homology dimerisation domain
Pfam	PF00554	3	10	9606	9606.ENSP00000221452,9606.ENSP00000226574,9606.ENSP00000358983	RELB,NFKB1,NFKB2	0.00027	0.0133	Rel homology DNA-binding domain
Pfam	PF01403	4	30	9606	9606.ENSP00000265361,9606.ENSP00000265362,9606.ENSP00000284136,9606.ENSP00000357909	SEMA3C,SEMA3A,SEMA3D,SEMA6C	0.00036	0.0136	Sema domain
Pfam	PF00531	4	31	9606	9606.ENSP00000226574,9606.ENSP00000256458,9606.ENSP00000296861,9606.ENSP00000358983	NFKB1,IRAK2,TNFRSF21,NFKB2	0.00041	0.0136	Death domain
Pfam	PF02394	2	2	9606	9606.ENSP00000263339,9606.ENSP00000263341	IL1A,IL1B	0.0006	0.0178	Interleukin-1 propeptide
Pfam	PF00193	3	14	9606	9606.ENSP00000243347,9606.ENSP00000352606,9606.ENSP00000398632	TNFAIP6,HAPLN3,CD44	0.00062	0.0178	Extracellular link domain
Pfam	PF16739	2	4	9606	9606.ENSP00000263642,9606.ENSP00000369213	IFIH1,DDX58	0.0015	0.0366	Caspase recruitment domain
Pfam	PF01166	2	4	9606	9606.ENSP00000361458,9606.ENSP00000397435	TSC22D3,TSC22D1	0.0015	0.0366	TSC-22/dip/bun family
Process	GO.0009605	87	2152	9606	9606.ENSP00000005257,9606.ENSP00000006053,9606.ENSP00000216797,9606.ENSP00000220751,9606.ENSP00000221452,9606.ENSP00000225474,9606.ENSP00000225831,9606.ENSP00000226317,9606.ENSP00000226574,9606.ENSP00000228534,9606.ENSP00000234111,9606.ENSP00000243457,9606.ENSP00000245185,9606.ENSP00000245414,9606.ENSP00000245907,9606.ENSP00000251642,9606.ENSP00000252809,9606.ENSP00000256458,9606.ENSP00000256495,…	RALA,CX3CL1,NFKBIA,RIPK2,RELB,CSF3,CCL2,CXCL6,NFKB1,IL23A,ODC1,KCNJ2,MT2A,IRF1,C3,DHX58,GDF15,IRAK2,BHLHE40,OASL,RTP4,TLR2,THBS1,LIPG,IL1B,IFIH1,HERC6,ICAM1,STC2,SEMA3C,SEMA3A,SEMA3D,TIMP4,VCAM1,CLDN1,PTX3,CXCL3,CXCL5,ITGA2,TNFRSF21,CLEC4E,ANGPT2,TNIP1,HMGCS1,P2RX7,SELE,PLAUR,NTN4,NR4A2,CCL20,NUAK2,LHX9,SEMA6C,NFKB2,GBP5,GBP4,GBP2,GBP1,GBP3,SGIP1,IFIT3,IFIT2,PLAU,ZC3H12A,DDX58,TRIM22,IL24,ETS1,BC…	2.88e-31	1.19e-27	response to external stimulus
Process	GO.0002376	87	2370	9606	9606.ENSP00000004531,9606.ENSP00000006053,9606.ENSP00000161559,9606.ENSP00000216797,9606.ENSP00000220751,9606.ENSP00000221452,9606.ENSP00000225474,9606.ENSP00000225831,9606.ENSP00000226317,9606.ENSP00000226574,9606.ENSP00000228280,9606.ENSP00000228534,9606.ENSP00000241261,9606.ENSP00000242208,9606.ENSP00000243347,9606.ENSP00000245185,9606.ENSP00000245414,9606.ENSP00000245907,9606.ENSP00000246006,…	SLC7A2,CX3CL1,CEACAM1,NFKBIA,RIPK2,RELB,CSF3,CCL2,CXCL6,NFKB1,KITLG,IL23A,TNFSF10,INHBA,TNFAIP6,MT2A,IRF1,C3,CD93,DHX58,JAG1,IRAK2,FST,OASL,RTP4,IL1RN,TLR2,THBS1,IL1A,IL1B,IFIH1,KDR,HERC6,ICAM1,SEMA3C,LAMP3,SMAD6,BCL6B,VCAM1,CLDN1,PTX3,CXCL3,CXCL5,TNFRSF21,CLEC4E,ANGPT2,TNIP1,NFKBIZ,P2RX7,SELE,PTPRB,ZBTB16,PLAUR,CCL20,CTSS,NFKB2,GBP5,GBP4,GBP2,GBP1,GBP3,IFIT3,IFIT2,PLAU,ZC3H12A,TNFSF13B,B4GALT1,D…	2.72e-28	5.64e-25	immune system process
Process	GO.0006952	63	1234	9606	9606.ENSP00000004531,9606.ENSP00000006053,9606.ENSP00000220751,9606.ENSP00000221452,9606.ENSP00000225831,9606.ENSP00000226317,9606.ENSP00000226574,9606.ENSP00000228534,9606.ENSP00000242208,9606.ENSP00000243347,9606.ENSP00000245185,9606.ENSP00000245414,9606.ENSP00000245907,9606.ENSP00000251642,9606.ENSP00000256458,9606.ENSP00000257570,9606.ENSP00000259030,9606.ENSP00000259206,9606.ENSP00000260010,…	SLC7A2,CX3CL1,RIPK2,RELB,CCL2,CXCL6,NFKB1,IL23A,INHBA,TNFAIP6,MT2A,IRF1,C3,DHX58,IRAK2,OASL,RTP4,IL1RN,TLR2,THBS1,IL1A,IL1B,IFIH1,ICAM1,VCAM1,CLDN1,PTX3,CXCL3,CXCL5,TNFRSF21,CLEC4E,TNIP1,NFKBIZ,P2RX7,SELE,CCL20,NFKB2,GBP5,GBP4,GBP2,GBP1,GBP3,IFIT3,IFIT2,ZC3H12A,B4GALT1,DDX58,TRIM22,CXCL1,IL6,JAK3,CYLD,IFI35,CD44,HDAC9,GCH1,CXCL2,IL32,SAA2,C1R,ADAM8,PLA2G4C,TNFAIP3	6.61e-27	9.13e-24	defense response
Process	GO.0034097	56	1035	9606	9606.ENSP00000005257,9606.ENSP00000006053,9606.ENSP00000161559,9606.ENSP00000216797,9606.ENSP00000220751,9606.ENSP00000221452,9606.ENSP00000225474,9606.ENSP00000225831,9606.ENSP00000226317,9606.ENSP00000226574,9606.ENSP00000228534,9606.ENSP00000245185,9606.ENSP00000245414,9606.ENSP00000256458,9606.ENSP00000257570,9606.ENSP00000259206,9606.ENSP00000260010,9606.ENSP00000260356,9606.ENSP00000263339,…	RALA,CX3CL1,CEACAM1,NFKBIA,RIPK2,RELB,CSF3,CCL2,CXCL6,NFKB1,IL23A,MT2A,IRF1,IRAK2,OASL,IL1RN,TLR2,THBS1,IL1A,IL1B,BIRC3,ICAM1,LAMP3,TIMP4,VCAM1,CLDN1,CXCL3,CXCL5,TNFRSF21,SOX17,SELE,CCL20,NFKB2,GBP5,GBP4,GBP2,GBP1,GBP3,IFIT3,IFIT2,ZC3H12A,TNFSF13B,TRIM22,IL24,PID1,ETS1,CXCL1,IL18BP,IL6,JAK3,IFI35,CD44,GCH1,CXCL2,IL32,SOD2	6.59e-25	6.83e-22	response to cytokine
Process	GO.0051707	59	1173	9606	9606.ENSP00000006053,9606.ENSP00000216797,9606.ENSP00000220751,9606.ENSP00000221452,9606.ENSP00000225474,9606.ENSP00000225831,9606.ENSP00000226317,9606.ENSP00000226574,9606.ENSP00000228534,9606.ENSP00000234111,9606.ENSP00000245185,9606.ENSP00000245414,9606.ENSP00000245907,9606.ENSP00000251642,9606.ENSP00000256458,9606.ENSP00000257570,9606.ENSP00000259030,9606.ENSP00000260010,9606.ENSP00000263341,…	CX3CL1,NFKBIA,RIPK2,RELB,CSF3,CCL2,CXCL6,NFKB1,IL23A,ODC1,MT2A,IRF1,C3,DHX58,IRAK2,OASL,RTP4,TLR2,IL1B,IFIH1,HERC6,ICAM1,TIMP4,VCAM1,CLDN1,PTX3,CXCL3,CXCL5,TNFRSF21,CLEC4E,TNIP1,P2RX7,SELE,CCL20,NFKB2,GBP5,GBP4,GBP2,GBP1,GBP3,IFIT3,IFIT2,ZC3H12A,DDX58,TRIM22,IL24,BCL2L11,CXCL1,IL18BP,IL6,JAK3,CYLD,IFI35,CD44,GCH1,CXCL2,HMGA2,C1R,TNFAIP3	9.17e-25	7.6e-22	response to other organism
Process	GO.0006955	67	1560	9606	9606.ENSP00000006053,9606.ENSP00000161559,9606.ENSP00000220751,9606.ENSP00000221452,9606.ENSP00000225474,9606.ENSP00000225831,9606.ENSP00000226317,9606.ENSP00000226574,9606.ENSP00000228534,9606.ENSP00000241261,9606.ENSP00000243347,9606.ENSP00000245185,9606.ENSP00000245414,9606.ENSP00000245907,9606.ENSP00000246006,9606.ENSP00000251642,9606.ENSP00000254958,9606.ENSP00000257570,9606.ENSP00000259206,…	CX3CL1,CEACAM1,RIPK2,RELB,CSF3,CCL2,CXCL6,NFKB1,IL23A,TNFSF10,TNFAIP6,MT2A,IRF1,C3,CD93,DHX58,JAG1,OASL,IL1RN,TLR2,THBS1,IL1A,IL1B,IFIH1,ICAM1,SEMA3C,LAMP3,SMAD6,BCL6B,VCAM1,CLDN1,PTX3,CXCL3,CXCL5,TNFRSF21,CLEC4E,PTPRB,PLAUR,CCL20,CTSS,NFKB2,GBP5,GBP4,GBP2,GBP1,IFIT3,IFIT2,PLAU,TNFSF13B,B4GALT1,DSP,DDX58,TRIM22,ETS1,CXCL1,IL18BP,IL6,JAK3,CYLD,IFI35,CD44,GCH1,CXCL2,POU2F2,IL32,C1R,ADAM8	1.28e-24	7.6e-22	immune response
Process	GO.0006954	40	482	9606	9606.ENSP00000004531,9606.ENSP00000006053,9606.ENSP00000220751,9606.ENSP00000221452,9606.ENSP00000225831,9606.ENSP00000226317,9606.ENSP00000226574,9606.ENSP00000228534,9606.ENSP00000243347,9606.ENSP00000245907,9606.ENSP00000256458,9606.ENSP00000259206,9606.ENSP00000260010,9606.ENSP00000260356,9606.ENSP00000263339,9606.ENSP00000263341,9606.ENSP00000264832,9606.ENSP00000294728,9606.ENSP00000295927,…	SLC7A2,CX3CL1,RIPK2,RELB,CCL2,CXCL6,NFKB1,IL23A,TNFAIP6,C3,IRAK2,IL1RN,TLR2,THBS1,IL1A,IL1B,ICAM1,VCAM1,PTX3,CXCL3,CXCL5,TNFRSF21,TNIP1,NFKBIZ,P2RX7,SELE,CCL20,NFKB2,GBP5,ZC3H12A,B4GALT1,CXCL1,IL6,JAK3,HDAC9,CXCL2,SAA2,ADAM8,PLA2G4C,TNFAIP3	5.84e-24	2.69e-21	inflammatory response
Process	GO.0048583	100	3882	9606	9606.ENSP00000004531,9606.ENSP00000006053,9606.ENSP00000161559,9606.ENSP00000216797,9606.ENSP00000220751,9606.ENSP00000220809,9606.ENSP00000221452,9606.ENSP00000222553,9606.ENSP00000225474,9606.ENSP00000225831,9606.ENSP00000226317,9606.ENSP00000226574,9606.ENSP00000228280,9606.ENSP00000228534,9606.ENSP00000240100,9606.ENSP00000241261,9606.ENSP00000242208,9606.ENSP00000243347,9606.ENSP00000245414,…	SLC7A2,CX3CL1,CEACAM1,NFKBIA,RIPK2,PLAT,RELB,NAMPT,CSF3,CCL2,CXCL6,NFKB1,KITLG,IL23A,DUSP4,TNFSF10,INHBA,TNFAIP6,IRF1,C3,DHX58,GDF15,JAG1,IRAK2,FST,IL1RN,IER3,TLR2,THBS1,IL1A,IL1B,BIRC3,IFIH1,KDR,ICAM1,RASGRF2,STC2,SEMA3A,SMAD6,BCL6B,VCAM1,CXCL3,CXCL5,HHIP,ITGA2,TNFRSF21,SOX17,CLEC4E,FGF5,DAB2,ANGPT2,TNIP1,RHBDF2,NFKBIZ,LIMS2,P2RX7,SELE,PLAUR,NR4A2,BMF,CCL20,G0S2,CTSS,GBP5,GBP1,PPAP2B,PLAU,ZC3H12…	1.9e-21	7.89e-19	regulation of response to stimulus
Process	GO.0006950	91	3267	9606	9606.ENSP00000004531,9606.ENSP00000006053,9606.ENSP00000161559,9606.ENSP00000216797,9606.ENSP00000220751,9606.ENSP00000220809,9606.ENSP00000221452,9606.ENSP00000222543,9606.ENSP00000225831,9606.ENSP00000226317,9606.ENSP00000226574,9606.ENSP00000228534,9606.ENSP00000242208,9606.ENSP00000243347,9606.ENSP00000245185,9606.ENSP00000245414,9606.ENSP00000245907,9606.ENSP00000251642,9606.ENSP00000256458,…	SLC7A2,CX3CL1,CEACAM1,NFKBIA,RIPK2,PLAT,RELB,TFPI2,CCL2,CXCL6,NFKB1,IL23A,INHBA,TNFAIP6,MT2A,IRF1,C3,DHX58,IRAK2,OASL,RTP4,IL1RN,GMPR,TLR2,THBS1,SLC12A2,IL1A,IL1B,IFIH1,ICAM1,RASGRF2,STC2,CA2,SMAD6,VCAM1,CLDN1,PTX3,CXCL3,CXCL5,ITGA2,TNFRSF21,CLEC4E,ANGPT2,TNIP1,NFKBIZ,P2RX7,SELE,PLAUR,NR4A2,CCL20,NUAK2,NFKB2,GBP5,GBP4,GBP2,GBP1,GBP3,IFIT3,IFIT2,TSC22D3,PLAU,ZC3H12A,B4GALT1,DSP,DDX58,TRIM22,IL24,E…	2.62e-21	9.87e-19	response to stress
Process	GO.0010033	84	2815	9606	9606.ENSP00000005257,9606.ENSP00000006053,9606.ENSP00000161559,9606.ENSP00000216797,9606.ENSP00000220751,9606.ENSP00000221452,9606.ENSP00000222553,9606.ENSP00000225474,9606.ENSP00000225831,9606.ENSP00000226317,9606.ENSP00000226574,9606.ENSP00000228534,9606.ENSP00000241261,9606.ENSP00000242208,9606.ENSP00000245185,9606.ENSP00000245414,9606.ENSP00000252809,9606.ENSP00000254958,9606.ENSP00000256458,…	RALA,CX3CL1,CEACAM1,NFKBIA,RIPK2,RELB,NAMPT,CSF3,CCL2,CXCL6,NFKB1,IL23A,TNFSF10,INHBA,MT2A,IRF1,GDF15,JAG1,IRAK2,OASL,IL1RN,TLR2,THBS1,IL1A,IL1B,BIRC3,IFIH1,KDR,ICAM1,STC2,LAMP3,SQLE,CA2,TIMP4,SMAD6,VCAM1,CLDN1,CXCL3,CXCL5,ITGA2,TNFRSF21,SOX17,FGF5,ANGPT2,TNIP1,HMGCS1,P2RX7,SELE,NR4A2,CCL20,CACNA1A,CTSS,NFKB2,GBP5,GBP4,GBP2,GBP1,GBP3,IFIT3,IFIT2,ZC3H12A,TNFSF13B,ID1,DDX58,TRIM22,MSX1,IL24,PID1,ET…	3.24e-21	1.12e-18	response to organic substance
Process	GO.0071345	49	953	9606	9606.ENSP00000005257,9606.ENSP00000006053,9606.ENSP00000161559,9606.ENSP00000216797,9606.ENSP00000220751,9606.ENSP00000225474,9606.ENSP00000225831,9606.ENSP00000226317,9606.ENSP00000226574,9606.ENSP00000228534,9606.ENSP00000245185,9606.ENSP00000245414,9606.ENSP00000256458,9606.ENSP00000257570,9606.ENSP00000259206,9606.ENSP00000260010,9606.ENSP00000260356,9606.ENSP00000263339,9606.ENSP00000263341,…	RALA,CX3CL1,CEACAM1,NFKBIA,RIPK2,CSF3,CCL2,CXCL6,NFKB1,IL23A,MT2A,IRF1,IRAK2,OASL,IL1RN,TLR2,THBS1,IL1A,IL1B,BIRC3,ICAM1,VCAM1,CLDN1,CXCL3,CXCL5,TNFRSF21,SOX17,CCL20,GBP5,GBP4,GBP2,GBP1,GBP3,IFIT3,IFIT2,ZC3H12A,TNFSF13B,TRIM22,IL24,PID1,CXCL1,IL18BP,IL6,JAK3,IFI35,CD44,CXCL2,IL32,SOD2	8.67e-21	2.77e-18	cellular response to cytokine stimulus
Process	GO.0050896	145	7824	9606	9606.ENSP00000004531,9606.ENSP00000005257,9606.ENSP00000006053,9606.ENSP00000161559,9606.ENSP00000216797,9606.ENSP00000220751,9606.ENSP00000220809,9606.ENSP00000221452,9606.ENSP00000222543,9606.ENSP00000222553,9606.ENSP00000225474,9606.ENSP00000225831,9606.ENSP00000226317,9606.ENSP00000226574,9606.ENSP00000228280,9606.ENSP00000228534,9606.ENSP00000234111,9606.ENSP00000241261,9606.ENSP00000242208,…	SLC7A2,RALA,CX3CL1,CEACAM1,NFKBIA,RIPK2,PLAT,RELB,TFPI2,NAMPT,CSF3,CCL2,CXCL6,NFKB1,KITLG,IL23A,ODC1,TNFSF10,INHBA,TNFAIP6,KCNJ2,MT2A,IRF1,C3,CD93,DHX58,GDF15,JAG1,IRAK2,BHLHE40,OASL,RTP4,IL1RN,GMPR,TLR2,THBS1,LIPG,SLC12A2,IL1A,IL1B,BIRC3,IFIH1,KDR,HERC6,ICAM1,NPR3,RASGRF2,STC2,SEMA3C,SEMA3A,LAMP3,SQLE,NFKBIE,SEMA3D,CA2,TIMP4,SMAD6,BCL6B,VCAM1,CLDN1,PTX3,CXCL3,CXCL5,HHIP,ITGA2,TNFRSF21,SOX17,CLEC…	8.94e-21	2.77e-18	response to stimulus
Process	GO.0071310	73	2219	9606	9606.ENSP00000005257,9606.ENSP00000006053,9606.ENSP00000161559,9606.ENSP00000216797,9606.ENSP00000220751,9606.ENSP00000225474,9606.ENSP00000225831,9606.ENSP00000226317,9606.ENSP00000226574,9606.ENSP00000228534,9606.ENSP00000242208,9606.ENSP00000245185,9606.ENSP00000245414,9606.ENSP00000252809,9606.ENSP00000256458,9606.ENSP00000257570,9606.ENSP00000259206,9606.ENSP00000260010,9606.ENSP00000260356,…	RALA,CX3CL1,CEACAM1,NFKBIA,RIPK2,CSF3,CCL2,CXCL6,NFKB1,IL23A,INHBA,MT2A,IRF1,GDF15,IRAK2,OASL,IL1RN,TLR2,THBS1,IL1A,IL1B,BIRC3,IFIH1,KDR,ICAM1,STC2,CA2,SMAD6,VCAM1,CLDN1,CXCL3,CXCL5,ITGA2,TNFRSF21,SOX17,FGF5,ANGPT2,TNIP1,HMGCS1,P2RX7,NR4A2,CCL20,CACNA1A,CTSS,GBP5,GBP4,GBP2,GBP1,GBP3,IFIT3,IFIT2,ZC3H12A,TNFSF13B,ID1,DDX58,TRIM22,MSX1,IL24,PID1,BCL2L11,CXCL1,IL18BP,IL6,JAK3,IFI35,CD44,HDAC9,PDGFC,C…	2.3e-20	6.36e-18	cellular response to organic substance
Process	GO.0032101	48	955	9606	9606.ENSP00000004531,9606.ENSP00000006053,9606.ENSP00000161559,9606.ENSP00000216797,9606.ENSP00000220751,9606.ENSP00000220809,9606.ENSP00000221452,9606.ENSP00000225831,9606.ENSP00000226317,9606.ENSP00000226574,9606.ENSP00000228534,9606.ENSP00000243347,9606.ENSP00000245414,9606.ENSP00000245907,9606.ENSP00000251642,9606.ENSP00000256458,9606.ENSP00000260010,9606.ENSP00000260356,9606.ENSP00000263341,…	SLC7A2,CX3CL1,CEACAM1,NFKBIA,RIPK2,PLAT,RELB,CCL2,CXCL6,NFKB1,IL23A,TNFAIP6,IRF1,C3,DHX58,IRAK2,TLR2,THBS1,IL1B,BIRC3,IFIH1,KDR,SEMA3A,BCL6B,CXCL3,CXCL5,ITGA2,CLEC4E,ANGPT2,TNIP1,SELE,PLAUR,CTSS,GBP5,PLAU,ZC3H12A,DDX58,ETS1,CXCL1,IL6,CYLD,PHLDB2,SERPINE2,CXCL2,C1R,ADAM8,LDLR,TNFAIP3	5.75e-20	1.49e-17	regulation of response to external stimulus
Process	GO.0042221	101	4153	9606	9606.ENSP00000004531,9606.ENSP00000005257,9606.ENSP00000006053,9606.ENSP00000161559,9606.ENSP00000216797,9606.ENSP00000220751,9606.ENSP00000221452,9606.ENSP00000222553,9606.ENSP00000225474,9606.ENSP00000225831,9606.ENSP00000226317,9606.ENSP00000226574,9606.ENSP00000228534,9606.ENSP00000241261,9606.ENSP00000242208,9606.ENSP00000245185,9606.ENSP00000245414,9606.ENSP00000252809,9606.ENSP00000254958,…	SLC7A2,RALA,CX3CL1,CEACAM1,NFKBIA,RIPK2,RELB,NAMPT,CSF3,CCL2,CXCL6,NFKB1,IL23A,TNFSF10,INHBA,MT2A,IRF1,GDF15,JAG1,IRAK2,OASL,RTP4,IL1RN,TLR2,THBS1,LIPG,IL1A,IL1B,BIRC3,IFIH1,KDR,ICAM1,STC2,SEMA3C,SEMA3A,LAMP3,SQLE,NFKBIE,SEMA3D,CA2,TIMP4,SMAD6,VCAM1,CLDN1,CXCL3,CXCL5,ITGA2,TNFRSF21,SOX17,FGF5,ANGPT2,TNIP1,HMGCS1,P2RX7,SELE,PLAUR,NTN4,NR4A2,CCL20,CACNA1A,LHX9,SEMA6C,CTSS,NFKB2,GBP5,GBP4,GBP2,GBP1,…	7.33e-20	1.79e-17	response to chemical
Process	GO.0051704	77	2514	9606	9606.ENSP00000005257,9606.ENSP00000006053,9606.ENSP00000216797,9606.ENSP00000220751,9606.ENSP00000221452,9606.ENSP00000222553,9606.ENSP00000225474,9606.ENSP00000225831,9606.ENSP00000226317,9606.ENSP00000226574,9606.ENSP00000228534,9606.ENSP00000234111,9606.ENSP00000243347,9606.ENSP00000245185,9606.ENSP00000245414,9606.ENSP00000245907,9606.ENSP00000246006,9606.ENSP00000251642,9606.ENSP00000256458,…	RALA,CX3CL1,NFKBIA,RIPK2,RELB,NAMPT,CSF3,CCL2,CXCL6,NFKB1,IL23A,ODC1,TNFAIP6,MT2A,IRF1,C3,CD93,DHX58,IRAK2,OASL,RTP4,TLR2,IL1B,BIRC3,IFIH1,KDR,HERC6,ICAM1,STC2,TIMP4,VCAM1,CLDN1,PTX3,CXCL3,CXCL5,ITGA2,TNFRSF21,SOX17,CLEC4E,ANGPT2,TNIP1,P2RX7,SELE,ZBTB16,CCL20,NFKB2,GBP5,GBP4,GBP2,GBP1,GBP3,NFIA,PPAP2B,IFIT3,IFIT2,ZC3H12A,B4GALT1,DDX58,TRIM22,IL24,ETS1,BCL2L11,CXCL1,IL18BP,IL6,JAK3,CYLD,IFI35,CD44…	8.17e-20	1.88e-17	multi-organism process
Process	GO.0019221	40	655	9606	9606.ENSP00000005257,9606.ENSP00000006053,9606.ENSP00000161559,9606.ENSP00000216797,9606.ENSP00000220751,9606.ENSP00000225474,9606.ENSP00000225831,9606.ENSP00000226317,9606.ENSP00000226574,9606.ENSP00000228534,9606.ENSP00000245185,9606.ENSP00000245414,9606.ENSP00000256458,9606.ENSP00000257570,9606.ENSP00000259206,9606.ENSP00000263339,9606.ENSP00000263341,9606.ENSP00000263464,9606.ENSP00000264832,…	RALA,CX3CL1,CEACAM1,NFKBIA,RIPK2,CSF3,CCL2,CXCL6,NFKB1,IL23A,MT2A,IRF1,IRAK2,OASL,IL1RN,IL1A,IL1B,BIRC3,ICAM1,VCAM1,CXCL3,CXCL5,TNFRSF21,CCL20,GBP2,GBP1,IFIT3,IFIT2,TNFSF13B,TRIM22,IL24,CXCL1,IL18BP,IL6,JAK3,IFI35,CD44,CXCL2,IL32,SOD2	1.99e-19	4.35e-17	cytokine-mediated signaling pathway
Process	GO.0007166	71	2198	9606	9606.ENSP00000005257,9606.ENSP00000006053,9606.ENSP00000161559,9606.ENSP00000216797,9606.ENSP00000220751,9606.ENSP00000220809,9606.ENSP00000221452,9606.ENSP00000225474,9606.ENSP00000225831,9606.ENSP00000226317,9606.ENSP00000226574,9606.ENSP00000228534,9606.ENSP00000241261,9606.ENSP00000242208,9606.ENSP00000245185,9606.ENSP00000245414,9606.ENSP00000252809,9606.ENSP00000254958,9606.ENSP00000256458,…	RALA,CX3CL1,CEACAM1,NFKBIA,RIPK2,PLAT,RELB,CSF3,CCL2,CXCL6,NFKB1,IL23A,TNFSF10,INHBA,MT2A,IRF1,GDF15,JAG1,IRAK2,OASL,IL1RN,TLR2,IL1A,IL1B,BIRC3,KDR,ICAM1,SEMA3C,SEMA3A,TIMP4,SMAD6,VCAM1,CXCL3,CXCL5,HHIP,ITGA2,TNFRSF21,SOX17,CLEC4E,FGF5,DAB2,ANGPT2,NFKBIZ,P2RX7,PLAUR,NR4A2,CCL20,G0S2,GBP2,GBP1,PPAP2B,IFIT3,IFIT2,ZC3H12A,TNFSF13B,ID1,TRIM22,MSX1,IL24,BCL2L11,CXCL1,IL18BP,IL6,JAK3,CYLD,IFI35,CD44,PD…	2.62e-19	5.43e-17	cell surface receptor signaling pathway
Process	GO.0032496	29	298	9606	9606.ENSP00000216797,9606.ENSP00000220751,9606.ENSP00000225474,9606.ENSP00000225831,9606.ENSP00000226317,9606.ENSP00000226574,9606.ENSP00000256458,9606.ENSP00000260010,9606.ENSP00000263341,9606.ENSP00000264832,9606.ENSP00000287814,9606.ENSP00000294728,9606.ENSP00000295522,9606.ENSP00000296026,9606.ENSP00000296027,9606.ENSP00000296861,9606.ENSP00000317891,9606.ENSP00000330696,9606.ENSP00000331736,…	NFKBIA,RIPK2,CSF3,CCL2,CXCL6,NFKB1,IRAK2,TLR2,IL1B,ICAM1,TIMP4,VCAM1,CLDN1,CXCL3,CXCL5,TNFRSF21,TNIP1,P2RX7,SELE,CCL20,NFKB2,ZC3H12A,IL24,CXCL1,IL18BP,IL6,GCH1,CXCL2,TNFAIP3	3.12e-19	6.16e-17	response to lipopolysaccharide
Process	GO.0002684	45	882	9606	9606.ENSP00000216797,9606.ENSP00000220751,9606.ENSP00000221452,9606.ENSP00000225474,9606.ENSP00000225831,9606.ENSP00000226317,9606.ENSP00000226574,9606.ENSP00000228534,9606.ENSP00000242208,9606.ENSP00000245907,9606.ENSP00000251642,9606.ENSP00000254958,9606.ENSP00000256458,9606.ENSP00000260010,9606.ENSP00000260356,9606.ENSP00000263339,9606.ENSP00000263341,9606.ENSP00000263642,9606.ENSP00000264832,…	NFKBIA,RIPK2,RELB,CSF3,CCL2,CXCL6,NFKB1,IL23A,INHBA,C3,DHX58,JAG1,IRAK2,TLR2,THBS1,IL1A,IL1B,IFIH1,ICAM1,CA2,VCAM1,CXCL3,CXCL5,ITGA2,TNFRSF21,CLEC4E,TNIP1,NFKBIZ,P2RX7,ZBTB16,CCL20,CTSS,GBP5,ZC3H12A,TNFSF13B,DDX58,ETS1,CXCL1,IL6,JAK3,CYLD,CXCL2,C1R,ADAM8,TNFAIP3	6.07e-19	1.14e-16	positive regulation of immune system process
Process	GO.0070887	77	2672	9606	9606.ENSP00000005257,9606.ENSP00000006053,9606.ENSP00000161559,9606.ENSP00000216797,9606.ENSP00000220751,9606.ENSP00000225474,9606.ENSP00000225831,9606.ENSP00000226317,9606.ENSP00000226574,9606.ENSP00000228534,9606.ENSP00000242208,9606.ENSP00000245185,9606.ENSP00000245414,9606.ENSP00000252809,9606.ENSP00000256458,9606.ENSP00000257570,9606.ENSP00000259206,9606.ENSP00000260010,9606.ENSP00000260356,…	RALA,CX3CL1,CEACAM1,NFKBIA,RIPK2,CSF3,CCL2,CXCL6,NFKB1,IL23A,INHBA,MT2A,IRF1,GDF15,IRAK2,OASL,IL1RN,TLR2,THBS1,IL1A,IL1B,BIRC3,IFIH1,KDR,ICAM1,STC2,CA2,SMAD6,VCAM1,CLDN1,CXCL3,CXCL5,ITGA2,TNFRSF21,SOX17,FGF5,ANGPT2,TNIP1,HMGCS1,P2RX7,NR4A2,CCL20,CACNA1A,CTSS,GBP5,GBP4,GBP2,GBP1,GBP3,IFIT3,IFIT2,ZC3H12A,TNFSF13B,ID1,DDX58,TRIM22,MSX1,IL24,PID1,ETS1,BCL2L11,CXCL1,IL18BP,IL6,JAK3,IFI35,CD44,DOCK4,HD…	2.74e-18	4.74e-16	cellular response to chemical stimulus
Process	GO.0051239	78	2788	9606	9606.ENSP00000006053,9606.ENSP00000161559,9606.ENSP00000216797,9606.ENSP00000220751,9606.ENSP00000220809,9606.ENSP00000221452,9606.ENSP00000225474,9606.ENSP00000226574,9606.ENSP00000228534,9606.ENSP00000242208,9606.ENSP00000243457,9606.ENSP00000245414,9606.ENSP00000245907,9606.ENSP00000251642,9606.ENSP00000252809,9606.ENSP00000254958,9606.ENSP00000256759,9606.ENSP00000259206,9606.ENSP00000260010,…	CX3CL1,CEACAM1,NFKBIA,RIPK2,PLAT,RELB,CSF3,NFKB1,IL23A,INHBA,KCNJ2,IRF1,C3,DHX58,GDF15,JAG1,FST,IL1RN,TLR2,THBS1,LIPG,IL1A,IL1B,BIRC3,IFIH1,KDR,ICAM1,STC2,SEMA3C,SEMA3A,CA2,SMAD6,ITGA2,TNFRSF21,SOX17,CLEC4E,DAB2,ANGPT2,NFKBIZ,LIMS2,P2RX7,ZBTB16,PLAUR,NTN4,NR4A2,CCL20,E2F2,SEMA6C,NFKB2,GBP5,GBP1,PPAP2B,TSC22D3,PLAU,KCNK15,ZC3H12A,ID1,B4GALT1,DSP,DDX58,MSX1,ETS1,BCL2L11,TYMP,NAV3,IL6,JAK3,CYLD,DOCK…	8.01e-18	1.33e-15	regulation of multicellular organismal process
Process	GO.0009617	35	555	9606	9606.ENSP00000216797,9606.ENSP00000220751,9606.ENSP00000225474,9606.ENSP00000225831,9606.ENSP00000226317,9606.ENSP00000226574,9606.ENSP00000228534,9606.ENSP00000245907,9606.ENSP00000251642,9606.ENSP00000256458,9606.ENSP00000260010,9606.ENSP00000263341,9606.ENSP00000264346,9606.ENSP00000264832,9606.ENSP00000287814,9606.ENSP00000294728,9606.ENSP00000295522,9606.ENSP00000296026,9606.ENSP00000296027,…	NFKBIA,RIPK2,CSF3,CCL2,CXCL6,NFKB1,IL23A,C3,DHX58,IRAK2,TLR2,IL1B,HERC6,ICAM1,TIMP4,VCAM1,CLDN1,CXCL3,CXCL5,TNFRSF21,CLEC4E,TNIP1,P2RX7,SELE,CCL20,NFKB2,GBP5,ZC3H12A,IL24,CXCL1,IL18BP,IL6,GCH1,CXCL2,TNFAIP3	1.89e-17	3.01e-15	response to bacterium
Process	GO.0033993	41	825	9606	9606.ENSP00000216797,9606.ENSP00000220751,9606.ENSP00000225474,9606.ENSP00000225831,9606.ENSP00000226317,9606.ENSP00000226574,9606.ENSP00000242208,9606.ENSP00000256458,9606.ENSP00000259206,9606.ENSP00000260010,9606.ENSP00000260356,9606.ENSP00000263341,9606.ENSP00000264832,9606.ENSP00000265087,9606.ENSP00000285379,9606.ENSP00000287814,9606.ENSP00000294728,9606.ENSP00000295522,9606.ENSP00000296026,…	NFKBIA,RIPK2,CSF3,CCL2,CXCL6,NFKB1,INHBA,IRAK2,IL1RN,TLR2,THBS1,IL1B,ICAM1,STC2,CA2,TIMP4,VCAM1,CLDN1,CXCL3,CXCL5,ITGA2,TNFRSF21,TNIP1,HMGCS1,P2RX7,SELE,NR4A2,CCL20,NFKB2,ZC3H12A,IL24,PID1,ETS1,BCL2L11,CXCL1,IL18BP,IL6,GCH1,CXCL2,LDLR,TNFAIP3	6.99e-17	1.07e-14	response to lipid
Process	GO.0048518	111	5459	9606	9606.ENSP00000005257,9606.ENSP00000006053,9606.ENSP00000161559,9606.ENSP00000216797,9606.ENSP00000220751,9606.ENSP00000221452,9606.ENSP00000222553,9606.ENSP00000225474,9606.ENSP00000225831,9606.ENSP00000226317,9606.ENSP00000226574,9606.ENSP00000228280,9606.ENSP00000228534,9606.ENSP00000234111,9606.ENSP00000241261,9606.ENSP00000242208,9606.ENSP00000243347,9606.ENSP00000243457,9606.ENSP00000245414,…	RALA,CX3CL1,CEACAM1,NFKBIA,RIPK2,RELB,NAMPT,CSF3,CCL2,CXCL6,NFKB1,KITLG,IL23A,ODC1,TNFSF10,INHBA,TNFAIP6,KCNJ2,IRF1,C3,DHX58,GDF15,JAG1,IRAK2,FST,TLR2,THBS1,LIPG,IL1A,IL1B,BIRC3,IFIH1,KDR,LAMC2,ICAM1,NPR3,RASGRF2,SEMA3C,SEMA3A,LAMP3,JDP2,ABI3BP,CA2,SMAD6,VCAM1,CLDN1,PTX3,CXCL3,CXCL5,ITGA2,TNFRSF21,SOX17,CLEC4E,FGF5,DAB2,ANGPT2,TNIP1,NFKBIZ,LIMS2,P2RX7,SELE,ZBTB16,PLAUR,NR4A2,BMF,CCL20,E2F2,G0S2,C…	2.34e-16	3.47e-14	positive regulation of biological process
Process	GO.0002682	52	1391	9606	9606.ENSP00000004531,9606.ENSP00000161559,9606.ENSP00000216797,9606.ENSP00000220751,9606.ENSP00000221452,9606.ENSP00000225474,9606.ENSP00000225831,9606.ENSP00000226317,9606.ENSP00000226574,9606.ENSP00000228534,9606.ENSP00000242208,9606.ENSP00000245414,9606.ENSP00000245907,9606.ENSP00000251642,9606.ENSP00000254958,9606.ENSP00000256458,9606.ENSP00000260010,9606.ENSP00000260356,9606.ENSP00000263339,…	SLC7A2,CEACAM1,NFKBIA,RIPK2,RELB,CSF3,CCL2,CXCL6,NFKB1,IL23A,INHBA,IRF1,C3,DHX58,JAG1,IRAK2,TLR2,THBS1,IL1A,IL1B,BIRC3,IFIH1,ICAM1,CA2,VCAM1,CXCL3,CXCL5,ITGA2,TNFRSF21,CLEC4E,TNIP1,NFKBIZ,P2RX7,ZBTB16,CCL20,CTSS,GBP5,GBP1,TSC22D3,ZC3H12A,TNFSF13B,DDX58,ETS1,CXCL1,IL6,JAK3,CYLD,CXCL2,C1R,ADAM8,LDLR,TNFAIP3	2.43e-16	3.47e-14	regulation of immune system process
Process	GO.0051270	41	886	9606	9606.ENSP00000006053,9606.ENSP00000161559,9606.ENSP00000225831,9606.ENSP00000226317,9606.ENSP00000228534,9606.ENSP00000243347,9606.ENSP00000243457,9606.ENSP00000254958,9606.ENSP00000260356,9606.ENSP00000263339,9606.ENSP00000263341,9606.ENSP00000263923,9606.ENSP00000264144,9606.ENSP00000264832,9606.ENSP00000265361,9606.ENSP00000265362,9606.ENSP00000296026,9606.ENSP00000296027,9606.ENSP00000296585,…	CX3CL1,CEACAM1,CCL2,CXCL6,IL23A,TNFAIP6,KCNJ2,JAG1,THBS1,IL1A,IL1B,KDR,LAMC2,ICAM1,SEMA3C,SEMA3A,CXCL3,CXCL5,ITGA2,DAB2,ANGPT2,CCL20,PPAP2B,PLAU,ZC3H12A,B4GALT1,DSP,DDX58,IL24,ETS1,CXCL1,NAV3,IL6,DOCK4,PHLDB2,HDAC9,SERPINE2,PDGFC,CXCL2,SOD2,ADAM8	7.38e-16	9.77e-14	regulation of cellular component movement
Process	GO.0048584	63	2054	9606	9606.ENSP00000006053,9606.ENSP00000216797,9606.ENSP00000220751,9606.ENSP00000221452,9606.ENSP00000225474,9606.ENSP00000225831,9606.ENSP00000226317,9606.ENSP00000226574,9606.ENSP00000228280,9606.ENSP00000228534,9606.ENSP00000241261,9606.ENSP00000242208,9606.ENSP00000245907,9606.ENSP00000251642,9606.ENSP00000252809,9606.ENSP00000254958,9606.ENSP00000256458,9606.ENSP00000260010,9606.ENSP00000260356,…	CX3CL1,NFKBIA,RIPK2,RELB,CSF3,CCL2,CXCL6,NFKB1,KITLG,IL23A,TNFSF10,INHBA,C3,DHX58,GDF15,JAG1,IRAK2,TLR2,THBS1,IL1B,BIRC3,IFIH1,KDR,ICAM1,SEMA3A,CXCL3,CXCL5,ITGA2,TNFRSF21,CLEC4E,FGF5,DAB2,TNIP1,NFKBIZ,LIMS2,P2RX7,PLAUR,BMF,CCL20,G0S2,CTSS,GBP5,PPAP2B,ZC3H12A,TNFSF13B,DDX58,TRIM22,ESM1,MSX1,IL24,ETS1,BCL2L11,CXCL1,IL6,CYLD,CD44,PDGFC,CXCL2,HMGA2,C1R,ADAM8,LDLR,TNFAIP3	7.07e-16	9.77e-14	positive regulation of response to stimulus
Process	GO.0030334	38	753	9606	9606.ENSP00000006053,9606.ENSP00000161559,9606.ENSP00000225831,9606.ENSP00000226317,9606.ENSP00000228534,9606.ENSP00000243347,9606.ENSP00000254958,9606.ENSP00000260356,9606.ENSP00000263339,9606.ENSP00000263341,9606.ENSP00000263923,9606.ENSP00000264144,9606.ENSP00000264832,9606.ENSP00000265361,9606.ENSP00000265362,9606.ENSP00000296026,9606.ENSP00000296027,9606.ENSP00000296585,9606.ENSP00000313391,…	CX3CL1,CEACAM1,CCL2,CXCL6,IL23A,TNFAIP6,JAG1,THBS1,IL1A,IL1B,KDR,LAMC2,ICAM1,SEMA3C,SEMA3A,CXCL3,CXCL5,ITGA2,DAB2,ANGPT2,CCL20,PPAP2B,PLAU,ZC3H12A,DDX58,IL24,ETS1,CXCL1,NAV3,IL6,DOCK4,PHLDB2,HDAC9,SERPINE2,PDGFC,CXCL2,SOD2,ADAM8	7.12e-16	9.77e-14	regulation of cell migration
Process	GO.0009966	78	3033	9606	9606.ENSP00000006053,9606.ENSP00000161559,9606.ENSP00000216797,9606.ENSP00000220751,9606.ENSP00000222553,9606.ENSP00000225474,9606.ENSP00000225831,9606.ENSP00000226317,9606.ENSP00000226574,9606.ENSP00000228280,9606.ENSP00000228534,9606.ENSP00000240100,9606.ENSP00000241261,9606.ENSP00000242208,9606.ENSP00000245414,9606.ENSP00000245907,9606.ENSP00000251642,9606.ENSP00000252809,9606.ENSP00000254958,…	CX3CL1,CEACAM1,NFKBIA,RIPK2,NAMPT,CSF3,CCL2,CXCL6,NFKB1,KITLG,IL23A,DUSP4,TNFSF10,INHBA,IRF1,C3,DHX58,GDF15,JAG1,IRAK2,FST,IL1RN,IER3,TLR2,THBS1,IL1A,IL1B,BIRC3,KDR,ICAM1,RASGRF2,STC2,SEMA3A,SMAD6,CXCL3,CXCL5,HHIP,SOX17,FGF5,DAB2,TNIP1,RHBDF2,LIMS2,P2RX7,PLAUR,NR4A2,BMF,CCL20,G0S2,GBP1,PPAP2B,PLAU,ZC3H12A,TRAF1,TNFSF13B,ID1,TRIM22,ESM1,MSX1,IL24,PID1,BCL2L11,TYMP,CXCL1,IL18BP,IL6,JAK3,CYLD,CD44,S…	9.2e-16	1.16e-13	regulation of signal transduction
Process	GO.0098542	40	859	9606	9606.ENSP00000006053,9606.ENSP00000220751,9606.ENSP00000221452,9606.ENSP00000225831,9606.ENSP00000226317,9606.ENSP00000226574,9606.ENSP00000228534,9606.ENSP00000245185,9606.ENSP00000245414,9606.ENSP00000245907,9606.ENSP00000251642,9606.ENSP00000257570,9606.ENSP00000259030,9606.ENSP00000260010,9606.ENSP00000263642,9606.ENSP00000264832,9606.ENSP00000294728,9606.ENSP00000295522,9606.ENSP00000295927,…	CX3CL1,RIPK2,RELB,CCL2,CXCL6,NFKB1,IL23A,MT2A,IRF1,C3,DHX58,OASL,RTP4,TLR2,IFIH1,ICAM1,VCAM1,CLDN1,PTX3,CLEC4E,P2RX7,CCL20,NFKB2,GBP5,GBP4,GBP2,GBP1,GBP3,IFIT3,IFIT2,ZC3H12A,DDX58,TRIM22,IL6,JAK3,CYLD,IFI35,CD44,GCH1,C1R	1.45e-15	1.77e-13	defense response to other organism
Process	GO.0023052	105	5108	9606	9606.ENSP00000005257,9606.ENSP00000006053,9606.ENSP00000161559,9606.ENSP00000216797,9606.ENSP00000220751,9606.ENSP00000220809,9606.ENSP00000221452,9606.ENSP00000222553,9606.ENSP00000225474,9606.ENSP00000225831,9606.ENSP00000226317,9606.ENSP00000226574,9606.ENSP00000228280,9606.ENSP00000228534,9606.ENSP00000241261,9606.ENSP00000242208,9606.ENSP00000243347,9606.ENSP00000243457,9606.ENSP00000245185,…	RALA,CX3CL1,CEACAM1,NFKBIA,RIPK2,PLAT,RELB,NAMPT,CSF3,CCL2,CXCL6,NFKB1,KITLG,IL23A,TNFSF10,INHBA,TNFAIP6,KCNJ2,MT2A,IRF1,C3,CD93,GDF15,JAG1,IRAK2,OASL,IL1RN,TLR2,SLC12A2,IL1A,IL1B,BIRC3,IFIH1,KDR,ICAM1,NPR3,RASGRF2,STC2,SEMA3C,SEMA3A,CA2,TIMP4,SMAD6,VCAM1,CXCL3,CXCL5,HHIP,ITGA2,TNFRSF21,SOX17,CLEC4E,RRAD,FGF5,DAB2,ANGPT2,TNIP1,NFKBIZ,P2RX7,SELE,PTPRB,PLAUR,NTN4,RAPGEF5,NR4A2,BMF,CCL20,E2F2,G0S2,N…	1.81e-15	2.15e-13	signaling
Process	GO.0032103	31	499	9606	9606.ENSP00000006053,9606.ENSP00000216797,9606.ENSP00000220751,9606.ENSP00000221452,9606.ENSP00000226317,9606.ENSP00000226574,9606.ENSP00000228534,9606.ENSP00000245907,9606.ENSP00000251642,9606.ENSP00000256458,9606.ENSP00000260010,9606.ENSP00000260356,9606.ENSP00000263341,9606.ENSP00000263642,9606.ENSP00000263923,9606.ENSP00000296026,9606.ENSP00000296027,9606.ENSP00000296585,9606.ENSP00000299663,…	CX3CL1,NFKBIA,RIPK2,RELB,CXCL6,NFKB1,IL23A,C3,DHX58,IRAK2,TLR2,THBS1,IL1B,IFIH1,KDR,CXCL3,CXCL5,ITGA2,CLEC4E,TNIP1,CTSS,GBP5,DDX58,ETS1,CXCL1,IL6,CYLD,CXCL2,ADAM8,LDLR,TNFAIP3	2.33e-15	2.68e-13	positive regulation of response to external stimulus
Process	GO.0007165	100	4738	9606	9606.ENSP00000005257,9606.ENSP00000006053,9606.ENSP00000161559,9606.ENSP00000216797,9606.ENSP00000220751,9606.ENSP00000220809,9606.ENSP00000221452,9606.ENSP00000222553,9606.ENSP00000225474,9606.ENSP00000225831,9606.ENSP00000226317,9606.ENSP00000226574,9606.ENSP00000228280,9606.ENSP00000228534,9606.ENSP00000241261,9606.ENSP00000242208,9606.ENSP00000243347,9606.ENSP00000245185,9606.ENSP00000245414,…	RALA,CX3CL1,CEACAM1,NFKBIA,RIPK2,PLAT,RELB,NAMPT,CSF3,CCL2,CXCL6,NFKB1,KITLG,IL23A,TNFSF10,INHBA,TNFAIP6,MT2A,IRF1,C3,CD93,GDF15,JAG1,IRAK2,OASL,IL1RN,TLR2,SLC12A2,IL1A,IL1B,BIRC3,IFIH1,KDR,ICAM1,NPR3,RASGRF2,STC2,SEMA3C,SEMA3A,CA2,TIMP4,SMAD6,VCAM1,CXCL3,CXCL5,HHIP,ITGA2,TNFRSF21,SOX17,CLEC4E,RRAD,FGF5,DAB2,ANGPT2,TNIP1,NFKBIZ,P2RX7,SELE,PTPRB,PLAUR,RAPGEF5,NR4A2,BMF,CCL20,E2F2,G0S2,NUAK2,CTSS,N…	2.95e-15	3.3e-13	signal transduction
Process	GO.0065009	81	3322	9606	9606.ENSP00000006053,9606.ENSP00000161559,9606.ENSP00000216797,9606.ENSP00000220751,9606.ENSP00000222543,9606.ENSP00000222553,9606.ENSP00000225474,9606.ENSP00000225831,9606.ENSP00000226317,9606.ENSP00000226574,9606.ENSP00000228280,9606.ENSP00000228534,9606.ENSP00000240100,9606.ENSP00000241261,9606.ENSP00000242208,9606.ENSP00000245907,9606.ENSP00000252809,9606.ENSP00000254958,9606.ENSP00000256458,…	CX3CL1,CEACAM1,NFKBIA,RIPK2,TFPI2,NAMPT,CSF3,CCL2,CXCL6,NFKB1,KITLG,IL23A,DUSP4,TNFSF10,INHBA,C3,GDF15,JAG1,IRAK2,BHLHE40,IL1RN,TLR2,THBS1,IL1A,IL1B,BIRC3,ICAM1,NPR3,RASGRF2,STC2,SEMA3A,LAMP3,NFKBIE,TIMP4,PTX3,CXCL3,CXCL5,ITGA2,RRAD,FGF5,DAB2,P2RX7,SELE,PLAUR,RAPGEF5,NR4A2,CCL20,CTSS,NFKB2,PPAP2B,IFIT2,PLAU,ZC3H12A,TRAF1,TNFSF13B,ID1,RPGR,DDX58,TRIM22,MSX1,IL24,BCL2L11,TYMP,CXCL1,IL18BP,IL6,JAK3,…	3.76e-15	4.11e-13	regulation of molecular function
Process	GO.0010646	81	3327	9606	9606.ENSP00000006053,9606.ENSP00000161559,9606.ENSP00000216797,9606.ENSP00000220751,9606.ENSP00000222553,9606.ENSP00000225474,9606.ENSP00000225831,9606.ENSP00000226317,9606.ENSP00000226574,9606.ENSP00000228280,9606.ENSP00000228534,9606.ENSP00000240100,9606.ENSP00000241261,9606.ENSP00000242208,9606.ENSP00000245414,9606.ENSP00000245907,9606.ENSP00000251642,9606.ENSP00000252809,9606.ENSP00000254958,…	CX3CL1,CEACAM1,NFKBIA,RIPK2,NAMPT,CSF3,CCL2,CXCL6,NFKB1,KITLG,IL23A,DUSP4,TNFSF10,INHBA,IRF1,C3,DHX58,GDF15,JAG1,IRAK2,FST,IL1RN,IER3,TLR2,THBS1,IL1A,IL1B,BIRC3,KDR,ICAM1,RASGRF2,STC2,SEMA3A,CA2,SMAD6,CXCL3,CXCL5,HHIP,ITGA2,SOX17,FGF5,DAB2,TNIP1,RHBDF2,LIMS2,P2RX7,PLAUR,NR4A2,BMF,CCL20,CACNA1A,G0S2,GBP1,PPAP2B,PLAU,ZC3H12A,TRAF1,TNFSF13B,ID1,TRIM22,ESM1,MSX1,IL24,PID1,BCL2L11,TYMP,CXCL1,IL18BP,IL…	4.1e-15	4.36e-13	regulation of cell communication
Process	GO.0032879	69	2524	9606	9606.ENSP00000005257,9606.ENSP00000006053,9606.ENSP00000161559,9606.ENSP00000216797,9606.ENSP00000220751,9606.ENSP00000225831,9606.ENSP00000226317,9606.ENSP00000226574,9606.ENSP00000228534,9606.ENSP00000242208,9606.ENSP00000243347,9606.ENSP00000243457,9606.ENSP00000245907,9606.ENSP00000254958,9606.ENSP00000260010,9606.ENSP00000260356,9606.ENSP00000261292,9606.ENSP00000263339,9606.ENSP00000263341,…	RALA,CX3CL1,CEACAM1,NFKBIA,RIPK2,CCL2,CXCL6,NFKB1,IL23A,INHBA,TNFAIP6,KCNJ2,C3,JAG1,TLR2,THBS1,LIPG,IL1A,IL1B,IFIH1,KDR,LAMC2,ICAM1,STC2,SEMA3C,SEMA3A,CA2,PTX3,CXCL3,CXCL5,ITGA2,TNFRSF21,CLEC4E,RRAD,DAB2,ANGPT2,RHBDF2,P2RX7,SELE,CCL20,CACNA1A,CTSS,GBP1,SGIP1,PPAP2B,PLAU,KCNK15,ZC3H12A,B4GALT1,DSP,DDX58,TRIM22,IL24,PID1,ETS1,CXCL1,NAV3,IL6,CYLD,DOCK4,PHLDB2,HDAC9,SERPINE2,PDGFC,CXCL2,SOD2,ADAM8,LD…	5.14e-15	5.33e-13	regulation of localization
Process	GO.0080134	48	1299	9606	9606.ENSP00000004531,9606.ENSP00000006053,9606.ENSP00000161559,9606.ENSP00000216797,9606.ENSP00000220751,9606.ENSP00000220809,9606.ENSP00000221452,9606.ENSP00000226574,9606.ENSP00000228534,9606.ENSP00000243347,9606.ENSP00000245414,9606.ENSP00000245907,9606.ENSP00000251642,9606.ENSP00000256458,9606.ENSP00000259874,9606.ENSP00000260010,9606.ENSP00000260356,9606.ENSP00000263341,9606.ENSP00000263464,…	SLC7A2,CX3CL1,CEACAM1,NFKBIA,RIPK2,PLAT,RELB,NFKB1,IL23A,TNFAIP6,IRF1,C3,DHX58,IRAK2,IER3,TLR2,THBS1,IL1B,BIRC3,IFIH1,SEMA3A,BCL6B,ITGA2,CLEC4E,TNIP1,SELE,PLAUR,CTSS,GBP5,PPAP2B,PLAU,ZC3H12A,DDX58,MSX1,ETS1,BCL2L11,IL6,CYLD,CD44,PHLDB2,SERPINE2,GCH1,HMGA2,C1R,SOD2,ADAM8,LDLR,TNFAIP3	7.06e-15	6.97e-13	regulation of response to stress
Process	GO.0023051	81	3360	9606	9606.ENSP00000006053,9606.ENSP00000161559,9606.ENSP00000216797,9606.ENSP00000220751,9606.ENSP00000222553,9606.ENSP00000225474,9606.ENSP00000225831,9606.ENSP00000226317,9606.ENSP00000226574,9606.ENSP00000228280,9606.ENSP00000228534,9606.ENSP00000240100,9606.ENSP00000241261,9606.ENSP00000242208,9606.ENSP00000245414,9606.ENSP00000245907,9606.ENSP00000251642,9606.ENSP00000252809,9606.ENSP00000254958,…	CX3CL1,CEACAM1,NFKBIA,RIPK2,NAMPT,CSF3,CCL2,CXCL6,NFKB1,KITLG,IL23A,DUSP4,TNFSF10,INHBA,IRF1,C3,DHX58,GDF15,JAG1,IRAK2,FST,IL1RN,IER3,TLR2,THBS1,IL1A,IL1B,BIRC3,KDR,ICAM1,RASGRF2,STC2,SEMA3A,CA2,SMAD6,CXCL3,CXCL5,HHIP,ITGA2,SOX17,FGF5,DAB2,TNIP1,RHBDF2,LIMS2,P2RX7,PLAUR,NR4A2,BMF,CCL20,CACNA1A,G0S2,GBP1,PPAP2B,PLAU,ZC3H12A,TRAF1,TNFSF13B,ID1,TRIM22,ESM1,MSX1,IL24,PID1,BCL2L11,TYMP,CXCL1,IL18BP,IL…	7.14e-15	6.97e-13	regulation of signaling
Process	GO.0051716	116	6212	9606	9606.ENSP00000005257,9606.ENSP00000006053,9606.ENSP00000161559,9606.ENSP00000216797,9606.ENSP00000220751,9606.ENSP00000220809,9606.ENSP00000221452,9606.ENSP00000222543,9606.ENSP00000222553,9606.ENSP00000225474,9606.ENSP00000225831,9606.ENSP00000226317,9606.ENSP00000226574,9606.ENSP00000228280,9606.ENSP00000228534,9606.ENSP00000241261,9606.ENSP00000242208,9606.ENSP00000243347,9606.ENSP00000243457,…	RALA,CX3CL1,CEACAM1,NFKBIA,RIPK2,PLAT,RELB,TFPI2,NAMPT,CSF3,CCL2,CXCL6,NFKB1,KITLG,IL23A,TNFSF10,INHBA,TNFAIP6,KCNJ2,MT2A,IRF1,C3,CD93,GDF15,JAG1,IRAK2,OASL,IL1RN,TLR2,THBS1,SLC12A2,IL1A,IL1B,BIRC3,IFIH1,KDR,ICAM1,NPR3,RASGRF2,STC2,SEMA3C,SEMA3A,CA2,TIMP4,SMAD6,VCAM1,CLDN1,CXCL3,CXCL5,HHIP,ITGA2,TNFRSF21,SOX17,CLEC4E,RRAD,FGF5,DAB2,ANGPT2,TNIP1,HMGCS1,NFKBIZ,P2RX7,SELE,PTPRB,PLAUR,RAPGEF5,NR4A2,B…	1.65e-14	1.55e-12	cellular response to stimulus
Process	GO.0045087	34	676	9606	9606.ENSP00000006053,9606.ENSP00000220751,9606.ENSP00000221452,9606.ENSP00000225831,9606.ENSP00000226574,9606.ENSP00000228534,9606.ENSP00000245185,9606.ENSP00000245414,9606.ENSP00000245907,9606.ENSP00000251642,9606.ENSP00000257570,9606.ENSP00000260010,9606.ENSP00000263642,9606.ENSP00000264832,9606.ENSP00000294728,9606.ENSP00000295522,9606.ENSP00000295927,9606.ENSP00000299663,9606.ENSP00000351671,…	CX3CL1,RIPK2,RELB,CCL2,NFKB1,IL23A,MT2A,IRF1,C3,DHX58,OASL,TLR2,IFIH1,ICAM1,VCAM1,CLDN1,PTX3,CLEC4E,CCL20,NFKB2,GBP5,GBP4,GBP2,GBP1,IFIT3,IFIT2,DDX58,TRIM22,JAK3,CYLD,IFI35,CD44,GCH1,C1R	3.22e-14	2.97e-12	innate immune response
Process	GO.1901700	49	1427	9606	9606.ENSP00000161559,9606.ENSP00000216797,9606.ENSP00000220751,9606.ENSP00000225474,9606.ENSP00000225831,9606.ENSP00000226317,9606.ENSP00000226574,9606.ENSP00000241261,9606.ENSP00000242208,9606.ENSP00000254958,9606.ENSP00000256458,9606.ENSP00000260010,9606.ENSP00000260356,9606.ENSP00000263341,9606.ENSP00000264832,9606.ENSP00000265087,9606.ENSP00000285379,9606.ENSP00000287814,9606.ENSP00000294728,…	CEACAM1,NFKBIA,RIPK2,CSF3,CCL2,CXCL6,NFKB1,TNFSF10,INHBA,JAG1,IRAK2,TLR2,THBS1,IL1B,ICAM1,STC2,CA2,TIMP4,VCAM1,CLDN1,CXCL3,CXCL5,ITGA2,TNFRSF21,ANGPT2,TNIP1,HMGCS1,P2RX7,SELE,NR4A2,CCL20,CACNA1A,NFKB2,ZC3H12A,ID1,IL24,PID1,ETS1,CXCL1,IL18BP,IL6,JAK3,HDAC9,GCH1,PDGFC,CXCL2,SOD2,LDLR,TNFAIP3	5.24e-14	4.65e-12	response to oxygen-containing compound
Process	GO.0042127	52	1594	9606	9606.ENSP00000161559,9606.ENSP00000216797,9606.ENSP00000220751,9606.ENSP00000222553,9606.ENSP00000225474,9606.ENSP00000225831,9606.ENSP00000226317,9606.ENSP00000228280,9606.ENSP00000228534,9606.ENSP00000234111,9606.ENSP00000242208,9606.ENSP00000245414,9606.ENSP00000254958,9606.ENSP00000260010,9606.ENSP00000260356,9606.ENSP00000263339,9606.ENSP00000263341,9606.ENSP00000263923,9606.ENSP00000264144,…	CEACAM1,NFKBIA,RIPK2,NAMPT,CSF3,CCL2,CXCL6,KITLG,IL23A,ODC1,INHBA,IRF1,JAG1,TLR2,THBS1,IL1A,IL1B,KDR,LAMC2,NPR3,SMAD6,BCL6B,VCAM1,CXCL3,CXCL5,ITGA2,TNFRSF21,SOX17,FGF5,LIMS2,MXD4,ZBTB16,IFIT3,PLAU,TNFSF13B,ID1,SAT1,B4GALT1,ESM1,MSX1,IL24,PID1,ETS1,CXCL1,IL6,JAK3,SERPINE2,PDGFC,CXCL2,HMGA2,SOD2,TNFAIP3	5.16e-14	4.65e-12	regulation of cell population proliferation
Process	GO.0048519	100	4953	9606	9606.ENSP00000006053,9606.ENSP00000161559,9606.ENSP00000216797,9606.ENSP00000220751,9606.ENSP00000220809,9606.ENSP00000221452,9606.ENSP00000222543,9606.ENSP00000225474,9606.ENSP00000225831,9606.ENSP00000226574,9606.ENSP00000228534,9606.ENSP00000240100,9606.ENSP00000241261,9606.ENSP00000242208,9606.ENSP00000243347,9606.ENSP00000245185,9606.ENSP00000245414,9606.ENSP00000245907,9606.ENSP00000251642,…	CX3CL1,CEACAM1,NFKBIA,RIPK2,PLAT,RELB,TFPI2,CSF3,CCL2,NFKB1,IL23A,DUSP4,TNFSF10,INHBA,TNFAIP6,MT2A,IRF1,C3,DHX58,GDF15,JAG1,IRAK2,BHLHE40,FST,OASL,IL1RN,IER3,TLR2,THBS1,IL1A,IL1B,BIRC3,IFIH1,KDR,ICAM1,NPR3,STC2,SEMA3A,LAMP3,JDP2,NFKBIE,TIMP4,SMAD6,BCL6B,PTX3,HHIP,TNFRSF21,SOX17,RRAD,DAB2,ANGPT2,TNIP1,RHBDF2,LIMS2,P2RX7,MXD4,ZBTB16,PLAUR,ETV7,NR4A2,BMF,E2F2,NUAK2,LHX9,SEMA6C,NFKB2,GBP1,NFIA,PPAP2B…	5.79e-14	5e-12	negative regulation of biological process
Process	GO.0030335	28	452	9606	9606.ENSP00000226317,9606.ENSP00000228534,9606.ENSP00000243347,9606.ENSP00000260356,9606.ENSP00000263339,9606.ENSP00000263341,9606.ENSP00000263923,9606.ENSP00000264144,9606.ENSP00000264832,9606.ENSP00000265361,9606.ENSP00000265362,9606.ENSP00000296026,9606.ENSP00000296027,9606.ENSP00000296585,9606.ENSP00000313391,9606.ENSP00000351671,9606.ENSP00000360296,9606.ENSP00000361850,9606.ENSP00000362179,…	CXCL6,IL23A,TNFAIP6,THBS1,IL1A,IL1B,KDR,LAMC2,ICAM1,SEMA3C,SEMA3A,CXCL3,CXCL5,ITGA2,DAB2,CCL20,PPAP2B,PLAU,ZC3H12A,ETS1,CXCL1,IL6,DOCK4,HDAC9,PDGFC,CXCL2,SOD2,ADAM8	6.37e-14	5.39e-12	positive regulation of cell migration
Process	GO.0007154	103	5219	9606	9606.ENSP00000005257,9606.ENSP00000006053,9606.ENSP00000161559,9606.ENSP00000216797,9606.ENSP00000220751,9606.ENSP00000220809,9606.ENSP00000221452,9606.ENSP00000222553,9606.ENSP00000225474,9606.ENSP00000225831,9606.ENSP00000226317,9606.ENSP00000226574,9606.ENSP00000228280,9606.ENSP00000228534,9606.ENSP00000241261,9606.ENSP00000242208,9606.ENSP00000243347,9606.ENSP00000245185,9606.ENSP00000245414,…	RALA,CX3CL1,CEACAM1,NFKBIA,RIPK2,PLAT,RELB,NAMPT,CSF3,CCL2,CXCL6,NFKB1,KITLG,IL23A,TNFSF10,INHBA,TNFAIP6,MT2A,IRF1,C3,CD93,GDF15,JAG1,IRAK2,OASL,IL1RN,TLR2,SLC12A2,IL1A,IL1B,BIRC3,IFIH1,KDR,ICAM1,NPR3,RASGRF2,STC2,SEMA3C,SEMA3A,CA2,TIMP4,SMAD6,VCAM1,CXCL3,CXCL5,HHIP,ITGA2,TNFRSF21,SOX17,CLEC4E,RRAD,FGF5,DAB2,ANGPT2,TNIP1,NFKBIZ,P2RX7,SELE,PTPRB,PLAUR,NTN4,RAPGEF5,NR4A2,BMF,CCL20,E2F2,G0S2,NUAK2,C…	7.48e-14	6.21e-12	cell communication
Process	GO.0048522	99	4898	9606	9606.ENSP00000005257,9606.ENSP00000006053,9606.ENSP00000161559,9606.ENSP00000216797,9606.ENSP00000220751,9606.ENSP00000221452,9606.ENSP00000222553,9606.ENSP00000225474,9606.ENSP00000225831,9606.ENSP00000226317,9606.ENSP00000226574,9606.ENSP00000228280,9606.ENSP00000228534,9606.ENSP00000234111,9606.ENSP00000241261,9606.ENSP00000242208,9606.ENSP00000243347,9606.ENSP00000243457,9606.ENSP00000245414,…	RALA,CX3CL1,CEACAM1,NFKBIA,RIPK2,RELB,NAMPT,CSF3,CCL2,CXCL6,NFKB1,KITLG,IL23A,ODC1,TNFSF10,INHBA,TNFAIP6,KCNJ2,IRF1,C3,DHX58,GDF15,JAG1,IRAK2,TLR2,THBS1,IL1A,IL1B,BIRC3,IFIH1,KDR,LAMC2,ICAM1,RASGRF2,SEMA3C,SEMA3A,JDP2,CA2,SMAD6,VCAM1,CLDN1,PTX3,CXCL3,CXCL5,ITGA2,SOX17,CLEC4E,FGF5,DAB2,TNIP1,NFKBIZ,LIMS2,P2RX7,SELE,ZBTB16,PLAUR,NR4A2,BMF,CCL20,E2F2,G0S2,NFKB2,GBP5,SGIP1,NFIA,PPAP2B,IFIT2,PLAU,ZC3H…	8.23e-14	6.69e-12	positive regulation of cellular process
Process	GO.0010469	31	577	9606	9606.ENSP00000006053,9606.ENSP00000222553,9606.ENSP00000225474,9606.ENSP00000225831,9606.ENSP00000226317,9606.ENSP00000228280,9606.ENSP00000228534,9606.ENSP00000241261,9606.ENSP00000242208,9606.ENSP00000252809,9606.ENSP00000254958,9606.ENSP00000259206,9606.ENSP00000263339,9606.ENSP00000263341,9606.ENSP00000265087,9606.ENSP00000265362,9606.ENSP00000296026,9606.ENSP00000296027,9606.ENSP00000311697,…	CX3CL1,NAMPT,CSF3,CCL2,CXCL6,KITLG,IL23A,TNFSF10,INHBA,GDF15,JAG1,IL1RN,IL1A,IL1B,STC2,SEMA3A,CXCL3,CXCL5,FGF5,CCL20,PLAU,TNFSF13B,IL24,TYMP,CXCL1,IL18BP,IL6,PDGFC,CXCL2,IL32,SAA2	9.54e-14	7.46e-12	regulation of signaling receptor activity
Process	GO.0030155	32	623	9606	9606.ENSP00000006053,9606.ENSP00000161559,9606.ENSP00000220751,9606.ENSP00000225831,9606.ENSP00000228534,9606.ENSP00000245414,9606.ENSP00000254958,9606.ENSP00000259206,9606.ENSP00000260356,9606.ENSP00000263341,9606.ENSP00000263923,9606.ENSP00000264832,9606.ENSP00000284322,9606.ENSP00000294728,9606.ENSP00000296585,9606.ENSP00000296861,9606.ENSP00000314897,9606.ENSP00000325663,9606.ENSP00000338157,…	CX3CL1,CEACAM1,RIPK2,CCL2,IL23A,IRF1,JAG1,IL1RN,THBS1,IL1B,KDR,ICAM1,ABI3BP,VCAM1,ITGA2,TNFRSF21,ANGPT2,NFKBIZ,ZBTB16,GBP1,PPAP2B,PLAU,ZC3H12A,TNFSF13B,ETS1,IL6,JAK3,CYLD,CD44,PHLDB2,SERPINE2,ADAM8	1.17e-13	8.98e-12	regulation of cell adhesion
Process	GO.0031347	33	676	9606	9606.ENSP00000004531,9606.ENSP00000006053,9606.ENSP00000161559,9606.ENSP00000216797,9606.ENSP00000220751,9606.ENSP00000221452,9606.ENSP00000226574,9606.ENSP00000228534,9606.ENSP00000243347,9606.ENSP00000245414,9606.ENSP00000245907,9606.ENSP00000251642,9606.ENSP00000256458,9606.ENSP00000260010,9606.ENSP00000263341,9606.ENSP00000263464,9606.ENSP00000263642,9606.ENSP00000293805,9606.ENSP00000296585,…	SLC7A2,CX3CL1,CEACAM1,NFKBIA,RIPK2,RELB,NFKB1,IL23A,TNFAIP6,IRF1,C3,DHX58,IRAK2,TLR2,IL1B,BIRC3,IFIH1,BCL6B,ITGA2,CLEC4E,TNIP1,SELE,CTSS,GBP5,ZC3H12A,DDX58,ETS1,IL6,CYLD,C1R,ADAM8,LDLR,TNFAIP3	1.78e-13	1.32e-11	regulation of defense response
Process	GO.0050789	162	11116	9606	9606.ENSP00000004531,9606.ENSP00000005257,9606.ENSP00000006053,9606.ENSP00000161559,9606.ENSP00000216797,9606.ENSP00000220751,9606.ENSP00000220809,9606.ENSP00000221452,9606.ENSP00000222543,9606.ENSP00000222553,9606.ENSP00000225474,9606.ENSP00000225831,9606.ENSP00000226317,9606.ENSP00000226574,9606.ENSP00000228280,9606.ENSP00000228534,9606.ENSP00000234111,9606.ENSP00000240100,9606.ENSP00000241261,…	SLC7A2,RALA,CX3CL1,CEACAM1,NFKBIA,RIPK2,PLAT,RELB,TFPI2,NAMPT,CSF3,CCL2,CXCL6,NFKB1,KITLG,IL23A,ODC1,DUSP4,TNFSF10,INHBA,TNFAIP6,KCNJ2,MT2A,IRF1,C3,CD93,DHX58,GDF15,JAG1,IRAK2,BHLHE40,FST,OASL,DRAM1,IL1RN,IER3,TLR2,THBS1,HECW2,LIPG,SLC12A2,IL1A,IL1B,BIRC3,IFIH1,KDR,LAMC2,ICAM1,NPR3,RASGRF2,STC2,SEMA3C,SEMA3A,LAMP3,SQLE,JDP2,NFKBIE,ABI3BP,CA2,TIMP4,SMAD6,BCL6B,VCAM1,CLDN1,PTX3,CXCL3,CXCL5,HHIP,ITG…	2.27e-13	1.65e-11	regulation of biological process
Process	GO.0051240	50	1551	9606	9606.ENSP00000006053,9606.ENSP00000161559,9606.ENSP00000220751,9606.ENSP00000225474,9606.ENSP00000226574,9606.ENSP00000228534,9606.ENSP00000242208,9606.ENSP00000245414,9606.ENSP00000245907,9606.ENSP00000251642,9606.ENSP00000254958,9606.ENSP00000256759,9606.ENSP00000260010,9606.ENSP00000260356,9606.ENSP00000261292,9606.ENSP00000263339,9606.ENSP00000263341,9606.ENSP00000263642,9606.ENSP00000263923,…	CX3CL1,CEACAM1,RIPK2,CSF3,NFKB1,IL23A,INHBA,IRF1,C3,DHX58,JAG1,FST,TLR2,THBS1,LIPG,IL1A,IL1B,IFIH1,KDR,ICAM1,SEMA3C,SEMA3A,CA2,ITGA2,SOX17,CLEC4E,DAB2,ANGPT2,NFKBIZ,P2RX7,ZBTB16,CCL20,NFKB2,GBP5,PPAP2B,ZC3H12A,B4GALT1,DDX58,ETS1,IL6,CYLD,PHLDB2,HDAC9,SERPINE2,GCH1,HMGA2,SOD2,ADAM8,LDLR,TNFAIP3	2.81e-13	2.01e-11	positive regulation of multicellular organismal process
Process	GO.0034612	20	217	9606	9606.ENSP00000006053,9606.ENSP00000216797,9606.ENSP00000225831,9606.ENSP00000226574,9606.ENSP00000260356,9606.ENSP00000263464,9606.ENSP00000264832,9606.ENSP00000294728,9606.ENSP00000295522,9606.ENSP00000296861,9606.ENSP00000331736,9606.ENSP00000351671,9606.ENSP00000359497,9606.ENSP00000359504,9606.ENSP00000359512,9606.ENSP00000362179,9606.ENSP00000365048,9606.ENSP00000375907,9606.ENSP00000384212,…	CX3CL1,NFKBIA,CCL2,NFKB1,THBS1,BIRC3,ICAM1,VCAM1,CLDN1,TNFRSF21,SELE,CCL20,GBP2,GBP1,GBP3,ZC3H12A,TNFSF13B,PID1,IL18BP,GCH1	3.68e-13	2.54e-11	response to tumor necrosis factor
Process	GO.0002252	38	927	9606	9606.ENSP00000161559,9606.ENSP00000221452,9606.ENSP00000226317,9606.ENSP00000226574,9606.ENSP00000228534,9606.ENSP00000243347,9606.ENSP00000245414,9606.ENSP00000245907,9606.ENSP00000246006,9606.ENSP00000251642,9606.ENSP00000254958,9606.ENSP00000257570,9606.ENSP00000259030,9606.ENSP00000260010,9606.ENSP00000263642,9606.ENSP00000264832,9606.ENSP00000295927,9606.ENSP00000296027,9606.ENSP00000299663,…	CEACAM1,RELB,CXCL6,NFKB1,IL23A,TNFAIP6,IRF1,C3,CD93,DHX58,JAG1,OASL,RTP4,TLR2,IFIH1,ICAM1,PTX3,CXCL5,CLEC4E,PTPRB,PLAUR,CTSS,GBP1,GBP3,IFIT3,IFIT2,PLAU,ZC3H12A,B4GALT1,DSP,DDX58,TRIM22,CXCL1,IL6,CD44,POU2F2,C1R,ADAM8	3.8e-13	2.58e-11	immune effector process
Process	GO.0050794	156	10484	9606	9606.ENSP00000004531,9606.ENSP00000005257,9606.ENSP00000006053,9606.ENSP00000161559,9606.ENSP00000216797,9606.ENSP00000220751,9606.ENSP00000220809,9606.ENSP00000221452,9606.ENSP00000222543,9606.ENSP00000222553,9606.ENSP00000225474,9606.ENSP00000225831,9606.ENSP00000226317,9606.ENSP00000226574,9606.ENSP00000228280,9606.ENSP00000228534,9606.ENSP00000234111,9606.ENSP00000240100,9606.ENSP00000241261,…	SLC7A2,RALA,CX3CL1,CEACAM1,NFKBIA,RIPK2,PLAT,RELB,TFPI2,NAMPT,CSF3,CCL2,CXCL6,NFKB1,KITLG,IL23A,ODC1,DUSP4,TNFSF10,INHBA,TNFAIP6,KCNJ2,MT2A,IRF1,C3,CD93,DHX58,GDF15,JAG1,IRAK2,BHLHE40,FST,OASL,DRAM1,IL1RN,IER3,TLR2,THBS1,HECW2,LIPG,SLC12A2,IL1A,IL1B,BIRC3,IFIH1,KDR,LAMC2,ICAM1,NPR3,RASGRF2,STC2,SEMA3C,SEMA3A,LAMP3,JDP2,NFKBIE,CA2,TIMP4,SMAD6,BCL6B,VCAM1,CLDN1,PTX3,CXCL3,CXCL5,HHIP,ITGA2,TNFRSF21,…	4.06e-13	2.72e-11	regulation of cellular process
Process	GO.0001817	31	615	9606	9606.ENSP00000006053,9606.ENSP00000161559,9606.ENSP00000220751,9606.ENSP00000221452,9606.ENSP00000226574,9606.ENSP00000228534,9606.ENSP00000242208,9606.ENSP00000245414,9606.ENSP00000245907,9606.ENSP00000251642,9606.ENSP00000260010,9606.ENSP00000260356,9606.ENSP00000263339,9606.ENSP00000263341,9606.ENSP00000263464,9606.ENSP00000263642,9606.ENSP00000296861,9606.ENSP00000299663,9606.ENSP00000330696,…	CX3CL1,CEACAM1,RIPK2,RELB,NFKB1,IL23A,INHBA,IRF1,C3,DHX58,TLR2,THBS1,IL1A,IL1B,BIRC3,IFIH1,TNFRSF21,CLEC4E,P2RX7,CCL20,NFKB2,GBP5,GBP1,ZC3H12A,DDX58,NAV3,IL6,JAK3,CYLD,ADAM8,TNFAIP3	4.74e-13	3.12e-11	regulation of cytokine production
Process	GO.0051241	41	1098	9606	9606.ENSP00000161559,9606.ENSP00000216797,9606.ENSP00000220809,9606.ENSP00000221452,9606.ENSP00000226574,9606.ENSP00000228534,9606.ENSP00000242208,9606.ENSP00000245414,9606.ENSP00000251642,9606.ENSP00000252809,9606.ENSP00000254958,9606.ENSP00000260010,9606.ENSP00000260356,9606.ENSP00000263341,9606.ENSP00000263642,9606.ENSP00000265087,9606.ENSP00000265362,9606.ENSP00000288840,9606.ENSP00000296861,…	CEACAM1,NFKBIA,PLAT,RELB,NFKB1,IL23A,INHBA,IRF1,DHX58,GDF15,JAG1,TLR2,THBS1,IL1B,IFIH1,STC2,SEMA3A,SMAD6,TNFRSF21,SOX17,ANGPT2,LIMS2,P2RX7,ZBTB16,PLAUR,E2F2,SEMA6C,GBP1,TSC22D3,PLAU,ZC3H12A,ID1,DDX58,NAV3,IL6,JAK3,CYLD,DOCK4,SERPINE2,LDLR,TNFAIP3	7.13e-13	4.62e-11	negative regulation of multicellular organismal process
Process	GO.0070555	17	147	9606	9606.ENSP00000006053,9606.ENSP00000216797,9606.ENSP00000220751,9606.ENSP00000225831,9606.ENSP00000226574,9606.ENSP00000256458,9606.ENSP00000259206,9606.ENSP00000263339,9606.ENSP00000263341,9606.ENSP00000264832,9606.ENSP00000331736,9606.ENSP00000351671,9606.ENSP00000359497,9606.ENSP00000359504,9606.ENSP00000359512,9606.ENSP00000362179,9606.ENSP00000376436	CX3CL1,NFKBIA,RIPK2,CCL2,NFKB1,IRAK2,IL1RN,IL1A,IL1B,ICAM1,SELE,CCL20,GBP2,GBP1,GBP3,ZC3H12A,ETS1	8.27e-13	5.19e-11	response to interleukin-1
Process	GO.0042981	48	1501	9606	9606.ENSP00000006053,9606.ENSP00000216797,9606.ENSP00000220751,9606.ENSP00000225831,9606.ENSP00000226574,9606.ENSP00000241261,9606.ENSP00000242208,9606.ENSP00000252809,9606.ENSP00000259874,9606.ENSP00000260356,9606.ENSP00000263339,9606.ENSP00000263341,9606.ENSP00000263464,9606.ENSP00000263923,9606.ENSP00000264832,9606.ENSP00000265080,9606.ENSP00000265598,9606.ENSP00000288840,9606.ENSP00000296575,…	CX3CL1,NFKBIA,RIPK2,CCL2,NFKB1,TNFSF10,INHBA,GDF15,IER3,THBS1,IL1A,IL1B,BIRC3,KDR,ICAM1,RASGRF2,LAMP3,SMAD6,HHIP,TNFRSF21,DAB2,LIMS2,P2RX7,ZBTB16,PLAUR,NR4A2,BMF,G0S2,NUAK2,IFIT3,IFIT2,TSC22D3,ZC3H12A,TRAF1,ID1,B4GALT1,MSX1,ETS1,BCL2L11,IL6,JAK3,CYLD,CD44,TNFAIP8,HMGA2,SOD2,ADAM8,TNFAIP3	1.27e-12	7.88e-11	regulation of apoptotic process
Process	GO.0031349	24	365	9606	9606.ENSP00000006053,9606.ENSP00000216797,9606.ENSP00000220751,9606.ENSP00000221452,9606.ENSP00000226574,9606.ENSP00000228534,9606.ENSP00000245907,9606.ENSP00000251642,9606.ENSP00000256458,9606.ENSP00000260010,9606.ENSP00000263341,9606.ENSP00000263642,9606.ENSP00000296585,9606.ENSP00000299663,9606.ENSP00000317891,9606.ENSP00000357981,9606.ENSP00000359488,9606.ENSP00000369213,9606.ENSP00000376436,…	CX3CL1,NFKBIA,RIPK2,RELB,NFKB1,IL23A,C3,DHX58,IRAK2,TLR2,IL1B,IFIH1,ITGA2,CLEC4E,TNIP1,CTSS,GBP5,DDX58,ETS1,IL6,CYLD,ADAM8,LDLR,TNFAIP3	1.37e-12	8.38e-11	positive regulation of defense response
Process	GO.0022407	24	366	9606	9606.ENSP00000006053,9606.ENSP00000161559,9606.ENSP00000220751,9606.ENSP00000225831,9606.ENSP00000228534,9606.ENSP00000245414,9606.ENSP00000254958,9606.ENSP00000259206,9606.ENSP00000263341,9606.ENSP00000264832,9606.ENSP00000294728,9606.ENSP00000296861,9606.ENSP00000325663,9606.ENSP00000338157,9606.ENSP00000360296,9606.ENSP00000362179,9606.ENSP00000365048,9606.ENSP00000376436,9606.ENSP00000385675,…	CX3CL1,CEACAM1,RIPK2,CCL2,IL23A,IRF1,JAG1,IL1RN,IL1B,ICAM1,VCAM1,TNFRSF21,NFKBIZ,ZBTB16,PPAP2B,ZC3H12A,TNFSF13B,ETS1,IL6,JAK3,CYLD,CD44,SERPINE2,ADAM8	1.45e-12	8.72e-11	regulation of cell-cell adhesion
Process	GO.0040011	41	1144	9606	9606.ENSP00000005257,9606.ENSP00000006053,9606.ENSP00000161559,9606.ENSP00000220809,9606.ENSP00000225831,9606.ENSP00000226317,9606.ENSP00000260356,9606.ENSP00000263341,9606.ENSP00000263923,9606.ENSP00000264832,9606.ENSP00000265361,9606.ENSP00000265362,9606.ENSP00000284136,9606.ENSP00000294728,9606.ENSP00000296026,9606.ENSP00000296027,9606.ENSP00000296585,9606.ENSP00000297316,9606.ENSP00000314897,…	RALA,CX3CL1,CEACAM1,PLAT,CCL2,CXCL6,THBS1,IL1B,KDR,ICAM1,SEMA3C,SEMA3A,SEMA3D,VCAM1,CXCL3,CXCL5,ITGA2,SOX17,ANGPT2,SELE,PLAUR,NTN4,NR4A2,CCL20,LHX9,SEMA6C,PPAP2B,PLAU,ID1,B4GALT1,ETS1,TYMP,CXCL1,IL6,PSTPIP2,JAK3,CD44,DOCK4,CXCL2,SAA2,ADAM8	2.54e-12	1.49e-10	locomotion
Process	GO.0050793	62	2416	9606	9606.ENSP00000006053,9606.ENSP00000161559,9606.ENSP00000216797,9606.ENSP00000220751,9606.ENSP00000225474,9606.ENSP00000225831,9606.ENSP00000226574,9606.ENSP00000228534,9606.ENSP00000242208,9606.ENSP00000245414,9606.ENSP00000245907,9606.ENSP00000252809,9606.ENSP00000254958,9606.ENSP00000256759,9606.ENSP00000259206,9606.ENSP00000260010,9606.ENSP00000260356,9606.ENSP00000263339,9606.ENSP00000263341,…	CX3CL1,CEACAM1,NFKBIA,RIPK2,CSF3,CCL2,NFKB1,IL23A,INHBA,IRF1,C3,GDF15,JAG1,FST,IL1RN,TLR2,THBS1,IL1A,IL1B,KDR,ICAM1,STC2,SEMA3C,SEMA3A,JDP2,CA2,SMAD6,BCL6B,TNFRSF21,SOX17,DAB2,ANGPT2,NFKBIZ,LIMS2,P2RX7,ZBTB16,NTN4,E2F2,SEMA6C,GBP1,TSC22D3,ZC3H12A,TNFSF13B,ID1,B4GALT1,MSX1,PID1,ETS1,BCL2L11,TYMP,IL6,JAK3,CYLD,CD44,PHLDB2,HDAC9,SERPINE2,HMGA2,SOD2,ADAM8,LDLR,TNFAIP3	3.46e-12	1.99e-10	regulation of developmental process
Process	GO.0071356	18	197	9606	9606.ENSP00000006053,9606.ENSP00000216797,9606.ENSP00000225831,9606.ENSP00000226574,9606.ENSP00000260356,9606.ENSP00000263464,9606.ENSP00000264832,9606.ENSP00000294728,9606.ENSP00000295522,9606.ENSP00000296861,9606.ENSP00000351671,9606.ENSP00000359497,9606.ENSP00000359504,9606.ENSP00000359512,9606.ENSP00000362179,9606.ENSP00000365048,9606.ENSP00000375907,9606.ENSP00000384212	CX3CL1,NFKBIA,CCL2,NFKB1,THBS1,BIRC3,ICAM1,VCAM1,CLDN1,TNFRSF21,CCL20,GBP2,GBP1,GBP3,ZC3H12A,TNFSF13B,PID1,IL18BP	6.67e-12	3.79e-10	cellular response to tumor necrosis factor
Process	GO.0010941	49	1638	9606	9606.ENSP00000006053,9606.ENSP00000216797,9606.ENSP00000220751,9606.ENSP00000225474,9606.ENSP00000225831,9606.ENSP00000226574,9606.ENSP00000241261,9606.ENSP00000242208,9606.ENSP00000252809,9606.ENSP00000259874,9606.ENSP00000260356,9606.ENSP00000263339,9606.ENSP00000263341,9606.ENSP00000263464,9606.ENSP00000263923,9606.ENSP00000264832,9606.ENSP00000265080,9606.ENSP00000265598,9606.ENSP00000288840,…	CX3CL1,NFKBIA,RIPK2,CSF3,CCL2,NFKB1,TNFSF10,INHBA,GDF15,IER3,THBS1,IL1A,IL1B,BIRC3,KDR,ICAM1,RASGRF2,LAMP3,SMAD6,HHIP,TNFRSF21,DAB2,LIMS2,P2RX7,ZBTB16,PLAUR,NR4A2,BMF,G0S2,NUAK2,IFIT3,IFIT2,TSC22D3,ZC3H12A,TRAF1,ID1,B4GALT1,MSX1,ETS1,BCL2L11,IL6,JAK3,CYLD,CD44,TNFAIP8,HMGA2,SOD2,ADAM8,TNFAIP3	7.41e-12	4.15e-10	regulation of cell death
Process	GO.0071222	16	146	9606	9606.ENSP00000216797,9606.ENSP00000220751,9606.ENSP00000225474,9606.ENSP00000225831,9606.ENSP00000226317,9606.ENSP00000226574,9606.ENSP00000256458,9606.ENSP00000260010,9606.ENSP00000263341,9606.ENSP00000264832,9606.ENSP00000317891,9606.ENSP00000351671,9606.ENSP00000362179,9606.ENSP00000375795,9606.ENSP00000385675,9606.ENSP00000481570	NFKBIA,RIPK2,CSF3,CCL2,CXCL6,NFKB1,IRAK2,TLR2,IL1B,ICAM1,TNIP1,CCL20,ZC3H12A,IL24,IL6,TNFAIP3	8.4e-12	4.64e-10	cellular response to lipopolysaccharide
Process	GO.0065007	164	11740	9606	9606.ENSP00000004531,9606.ENSP00000005257,9606.ENSP00000006053,9606.ENSP00000161559,9606.ENSP00000216797,9606.ENSP00000220751,9606.ENSP00000220809,9606.ENSP00000221452,9606.ENSP00000222543,9606.ENSP00000222553,9606.ENSP00000225474,9606.ENSP00000225831,9606.ENSP00000226317,9606.ENSP00000226574,9606.ENSP00000228280,9606.ENSP00000228534,9606.ENSP00000234111,9606.ENSP00000240100,9606.ENSP00000241261,…	SLC7A2,RALA,CX3CL1,CEACAM1,NFKBIA,RIPK2,PLAT,RELB,TFPI2,NAMPT,CSF3,CCL2,CXCL6,NFKB1,KITLG,IL23A,ODC1,DUSP4,TNFSF10,INHBA,TNFAIP6,KCNJ2,MT2A,IRF1,C3,CD93,DHX58,GDF15,JAG1,IRAK2,BHLHE40,FST,OASL,DRAM1,IL1RN,IER3,TLR2,THBS1,HECW2,LIPG,SLC12A2,IL1A,IL1B,BIRC3,IFIH1,KDR,LAMC2,ICAM1,NPR3,RASGRF2,STC2,SEMA3C,SEMA3A,LAMP3,SQLE,JDP2,NFKBIE,ABI3BP,CA2,SLC26A2,TIMP4,SMAD6,BCL6B,VCAM1,CLDN1,PTX3,CXCL3,CXCL5,…	1.03e-11	5.6e-10	biological regulation
Process	GO.0071347	15	124	9606	9606.ENSP00000006053,9606.ENSP00000216797,9606.ENSP00000220751,9606.ENSP00000225831,9606.ENSP00000226574,9606.ENSP00000256458,9606.ENSP00000259206,9606.ENSP00000263339,9606.ENSP00000263341,9606.ENSP00000264832,9606.ENSP00000351671,9606.ENSP00000359497,9606.ENSP00000359504,9606.ENSP00000359512,9606.ENSP00000362179	CX3CL1,NFKBIA,RIPK2,CCL2,NFKB1,IRAK2,IL1RN,IL1A,IL1B,ICAM1,CCL20,GBP2,GBP1,GBP3,ZC3H12A	1.07e-11	5.74e-10	cellular response to interleukin-1
Process	GO.0043900	30	653	9606	9606.ENSP00000161559,9606.ENSP00000216797,9606.ENSP00000220751,9606.ENSP00000221452,9606.ENSP00000226574,9606.ENSP00000228534,9606.ENSP00000242208,9606.ENSP00000245414,9606.ENSP00000251642,9606.ENSP00000256458,9606.ENSP00000257570,9606.ENSP00000260010,9606.ENSP00000263341,9606.ENSP00000263464,9606.ENSP00000263642,9606.ENSP00000265598,9606.ENSP00000295927,9606.ENSP00000299663,9606.ENSP00000317891,…	CEACAM1,NFKBIA,RIPK2,RELB,NFKB1,IL23A,INHBA,IRF1,DHX58,IRAK2,OASL,TLR2,IL1B,BIRC3,IFIH1,LAMP3,PTX3,CLEC4E,TNIP1,P2RX7,CTSS,GBP5,ZC3H12A,B4GALT1,DDX58,BCL2L11,CYLD,HMGA2,ADAM8,TNFAIP3	1.09e-11	5.77e-10	regulation of multi-organism process
Process	GO.0034341	17	176	9606	9606.ENSP00000006053,9606.ENSP00000225831,9606.ENSP00000245185,9606.ENSP00000245414,9606.ENSP00000257570,9606.ENSP00000260010,9606.ENSP00000264832,9606.ENSP00000294728,9606.ENSP00000295522,9606.ENSP00000351671,9606.ENSP00000359488,9606.ENSP00000359490,9606.ENSP00000359497,9606.ENSP00000359504,9606.ENSP00000369299,9606.ENSP00000398632,9606.ENSP00000419045	CX3CL1,CCL2,MT2A,IRF1,OASL,TLR2,ICAM1,VCAM1,CLDN1,CCL20,GBP5,GBP4,GBP2,GBP1,TRIM22,CD44,GCH1	1.17e-11	6.12e-10	response to interferon-gamma
Process	GO.0050727	22	338	9606	9606.ENSP00000004531,9606.ENSP00000006053,9606.ENSP00000216797,9606.ENSP00000226574,9606.ENSP00000228534,9606.ENSP00000243347,9606.ENSP00000245907,9606.ENSP00000260010,9606.ENSP00000263341,9606.ENSP00000263464,9606.ENSP00000293805,9606.ENSP00000296585,9606.ENSP00000317891,9606.ENSP00000331736,9606.ENSP00000359488,9606.ENSP00000362179,9606.ENSP00000376436,9606.ENSP00000385675,9606.ENSP00000438615,…	SLC7A2,CX3CL1,NFKBIA,NFKB1,IL23A,TNFAIP6,C3,TLR2,IL1B,BIRC3,BCL6B,ITGA2,TNIP1,SELE,GBP5,ZC3H12A,ETS1,IL6,C1R,ADAM8,LDLR,TNFAIP3	1.51e-11	7.84e-10	regulation of inflammatory response
Process	GO.0071346	16	155	9606	9606.ENSP00000006053,9606.ENSP00000225831,9606.ENSP00000245185,9606.ENSP00000245414,9606.ENSP00000257570,9606.ENSP00000260010,9606.ENSP00000264832,9606.ENSP00000294728,9606.ENSP00000295522,9606.ENSP00000351671,9606.ENSP00000359488,9606.ENSP00000359490,9606.ENSP00000359497,9606.ENSP00000359504,9606.ENSP00000369299,9606.ENSP00000398632	CX3CL1,CCL2,MT2A,IRF1,OASL,TLR2,ICAM1,VCAM1,CLDN1,CCL20,GBP5,GBP4,GBP2,GBP1,TRIM22,CD44	1.92e-11	9.83e-10	cellular response to interferon-gamma
Process	GO.0043066	34	859	9606	9606.ENSP00000006053,9606.ENSP00000216797,9606.ENSP00000220751,9606.ENSP00000225831,9606.ENSP00000226574,9606.ENSP00000241261,9606.ENSP00000259874,9606.ENSP00000260356,9606.ENSP00000263339,9606.ENSP00000263341,9606.ENSP00000263464,9606.ENSP00000263923,9606.ENSP00000264832,9606.ENSP00000265598,9606.ENSP00000288840,9606.ENSP00000296575,9606.ENSP00000313391,9606.ENSP00000326888,9606.ENSP00000339328,…	CX3CL1,NFKBIA,RIPK2,CCL2,NFKB1,TNFSF10,IER3,THBS1,IL1A,IL1B,BIRC3,KDR,ICAM1,LAMP3,SMAD6,HHIP,DAB2,LIMS2,PLAUR,NR4A2,NUAK2,IFIT3,TSC22D3,ZC3H12A,ID1,MSX1,IL6,JAK3,CD44,TNFAIP8,HMGA2,SOD2,ADAM8,TNFAIP3	1.98e-11	1e-09	negative regulation of apoptotic process
Process	GO.0016477	33	812	9606	9606.ENSP00000006053,9606.ENSP00000161559,9606.ENSP00000220809,9606.ENSP00000225831,9606.ENSP00000226317,9606.ENSP00000260356,9606.ENSP00000263341,9606.ENSP00000263923,9606.ENSP00000264832,9606.ENSP00000265361,9606.ENSP00000265362,9606.ENSP00000294728,9606.ENSP00000296026,9606.ENSP00000296027,9606.ENSP00000296585,9606.ENSP00000297316,9606.ENSP00000314897,9606.ENSP00000331736,9606.ENSP00000344479,…	CX3CL1,CEACAM1,PLAT,CCL2,CXCL6,THBS1,IL1B,KDR,ICAM1,SEMA3C,SEMA3A,VCAM1,CXCL3,CXCL5,ITGA2,SOX17,ANGPT2,SELE,NR4A2,CCL20,PPAP2B,PLAU,ID1,B4GALT1,CXCL1,IL6,PSTPIP2,JAK3,CD44,DOCK4,CXCL2,SAA2,ADAM8	2.09e-11	1.05e-09	cell migration
Process	GO.1901701	34	896	9606	9606.ENSP00000161559,9606.ENSP00000216797,9606.ENSP00000220751,9606.ENSP00000225474,9606.ENSP00000225831,9606.ENSP00000226317,9606.ENSP00000226574,9606.ENSP00000242208,9606.ENSP00000256458,9606.ENSP00000260010,9606.ENSP00000263341,9606.ENSP00000264832,9606.ENSP00000285379,9606.ENSP00000295522,9606.ENSP00000296585,9606.ENSP00000317891,9606.ENSP00000322706,9606.ENSP00000330696,9606.ENSP00000344479,…	CEACAM1,NFKBIA,RIPK2,CSF3,CCL2,CXCL6,NFKB1,INHBA,IRAK2,TLR2,IL1B,ICAM1,CA2,CLDN1,ITGA2,TNIP1,HMGCS1,P2RX7,NR4A2,CCL20,CACNA1A,ZC3H12A,ID1,IL24,PID1,ETS1,IL18BP,IL6,JAK3,HDAC9,PDGFC,SOD2,LDLR,TNFAIP3	5.92e-11	2.85e-09	cellular response to oxygen-containing compound
Process	GO.0048523	87	4454	9606	9606.ENSP00000006053,9606.ENSP00000161559,9606.ENSP00000216797,9606.ENSP00000220751,9606.ENSP00000220809,9606.ENSP00000221452,9606.ENSP00000222543,9606.ENSP00000225474,9606.ENSP00000225831,9606.ENSP00000226574,9606.ENSP00000240100,9606.ENSP00000241261,9606.ENSP00000242208,9606.ENSP00000245414,9606.ENSP00000245907,9606.ENSP00000251642,9606.ENSP00000252809,9606.ENSP00000254958,9606.ENSP00000256495,…	CX3CL1,CEACAM1,NFKBIA,RIPK2,PLAT,RELB,TFPI2,CSF3,CCL2,NFKB1,DUSP4,TNFSF10,INHBA,IRF1,C3,DHX58,GDF15,JAG1,BHLHE40,FST,IL1RN,IER3,TLR2,THBS1,IL1A,IL1B,BIRC3,KDR,ICAM1,NPR3,SEMA3A,LAMP3,JDP2,TIMP4,SMAD6,BCL6B,PTX3,HHIP,TNFRSF21,SOX17,DAB2,ANGPT2,TNIP1,RHBDF2,LIMS2,P2RX7,MXD4,ZBTB16,PLAUR,ETV7,NR4A2,BMF,NUAK2,LHX9,SEMA6C,NFKB2,GBP1,NFIA,PPAP2B,IFIT3,TSC22D3,ZC3H12A,ID1,B4GALT1,TRIM22,MSX1,IL24,PID1,E…	6.4e-11	3.05e-09	negative regulation of cellular process
Process	GO.0060548	35	953	9606	9606.ENSP00000006053,9606.ENSP00000216797,9606.ENSP00000220751,9606.ENSP00000225474,9606.ENSP00000225831,9606.ENSP00000226574,9606.ENSP00000241261,9606.ENSP00000259874,9606.ENSP00000260356,9606.ENSP00000263339,9606.ENSP00000263341,9606.ENSP00000263464,9606.ENSP00000263923,9606.ENSP00000264832,9606.ENSP00000265598,9606.ENSP00000288840,9606.ENSP00000296575,9606.ENSP00000313391,9606.ENSP00000326888,…	CX3CL1,NFKBIA,RIPK2,CSF3,CCL2,NFKB1,TNFSF10,IER3,THBS1,IL1A,IL1B,BIRC3,KDR,ICAM1,LAMP3,SMAD6,HHIP,DAB2,LIMS2,PLAUR,NR4A2,NUAK2,IFIT3,TSC22D3,ZC3H12A,ID1,MSX1,IL6,JAK3,CD44,TNFAIP8,HMGA2,SOD2,ADAM8,TNFAIP3	7.02e-11	3.31e-09	negative regulation of cell death
Process	GO.0032501	111	6507	9606	9606.ENSP00000004531,9606.ENSP00000005257,9606.ENSP00000006053,9606.ENSP00000161559,9606.ENSP00000216797,9606.ENSP00000220809,9606.ENSP00000221452,9606.ENSP00000222543,9606.ENSP00000222553,9606.ENSP00000225474,9606.ENSP00000225831,9606.ENSP00000228280,9606.ENSP00000228534,9606.ENSP00000234111,9606.ENSP00000240100,9606.ENSP00000241261,9606.ENSP00000242208,9606.ENSP00000243347,9606.ENSP00000243457,…	SLC7A2,RALA,CX3CL1,CEACAM1,NFKBIA,PLAT,RELB,TFPI2,NAMPT,CSF3,CCL2,KITLG,IL23A,ODC1,DUSP4,TNFSF10,INHBA,TNFAIP6,KCNJ2,IRF1,C3,GDF15,JAG1,BHLHE40,FST,RTP4,IL1RN,TLR2,THBS1,LIPG,IL1A,IL1B,BIRC3,KDR,LAMC2,HERC6,ICAM1,NPR3,STC2,SEMA3C,SEMA3A,SEMA3D,CA2,SLC26A2,TIMP4,SMAD6,VCAM1,CLDN1,HHIP,ITGA2,TNFRSF21,SOX17,CLEC4E,FGF5,DAB2,ANGPT2,HMGCS1,P2RX7,PTPRB,ZBTB16,PLAUR,NTN4,ETV7,RAPGEF5,NR4A2,WTAP,HAPLN3,L…	7.45e-11	3.47e-09	multicellular organismal process
Process	GO.0048870	34	914	9606	9606.ENSP00000006053,9606.ENSP00000161559,9606.ENSP00000220809,9606.ENSP00000225831,9606.ENSP00000226317,9606.ENSP00000260356,9606.ENSP00000263341,9606.ENSP00000263923,9606.ENSP00000264832,9606.ENSP00000265361,9606.ENSP00000265362,9606.ENSP00000294728,9606.ENSP00000296026,9606.ENSP00000296027,9606.ENSP00000296585,9606.ENSP00000297316,9606.ENSP00000314897,9606.ENSP00000331736,9606.ENSP00000344479,…	CX3CL1,CEACAM1,PLAT,CCL2,CXCL6,THBS1,IL1B,KDR,ICAM1,SEMA3C,SEMA3A,VCAM1,CXCL3,CXCL5,ITGA2,SOX17,ANGPT2,SELE,NR4A2,CCL20,PPAP2B,PLAU,ID1,B4GALT1,ETS1,CXCL1,IL6,PSTPIP2,JAK3,CD44,DOCK4,CXCL2,SAA2,ADAM8	9.86e-11	4.55e-09	cell motility
Process	GO.0050776	33	873	9606	9606.ENSP00000161559,9606.ENSP00000216797,9606.ENSP00000220751,9606.ENSP00000221452,9606.ENSP00000226574,9606.ENSP00000228534,9606.ENSP00000245414,9606.ENSP00000245907,9606.ENSP00000251642,9606.ENSP00000256458,9606.ENSP00000260010,9606.ENSP00000263341,9606.ENSP00000263464,9606.ENSP00000263642,9606.ENSP00000264832,9606.ENSP00000294728,9606.ENSP00000296861,9606.ENSP00000299663,9606.ENSP00000317891,…	CEACAM1,NFKBIA,RIPK2,RELB,NFKB1,IL23A,IRF1,C3,DHX58,IRAK2,TLR2,IL1B,BIRC3,IFIH1,ICAM1,VCAM1,TNFRSF21,CLEC4E,TNIP1,NFKBIZ,P2RX7,CTSS,GBP5,GBP1,ZC3H12A,TNFSF13B,DDX58,IL6,JAK3,CYLD,C1R,ADAM8,TNFAIP3	1.3e-10	5.79e-09	regulation of immune response
Process	GO.0048585	44	1483	9606	9606.ENSP00000006053,9606.ENSP00000161559,9606.ENSP00000216797,9606.ENSP00000220809,9606.ENSP00000225831,9606.ENSP00000226574,9606.ENSP00000240100,9606.ENSP00000241261,9606.ENSP00000243347,9606.ENSP00000251642,9606.ENSP00000252809,9606.ENSP00000256759,9606.ENSP00000259206,9606.ENSP00000260356,9606.ENSP00000263339,9606.ENSP00000263341,9606.ENSP00000264832,9606.ENSP00000265362,9606.ENSP00000288840,…	CX3CL1,CEACAM1,NFKBIA,PLAT,CCL2,NFKB1,DUSP4,TNFSF10,TNFAIP6,DHX58,GDF15,FST,IL1RN,THBS1,IL1A,IL1B,ICAM1,SEMA3A,SMAD6,HHIP,SOX17,DAB2,ANGPT2,TNIP1,P2RX7,PLAUR,NR4A2,GBP1,PLAU,ZC3H12A,PID1,ETS1,IL18BP,IL6,JAK3,CYLD,CD44,PHLDB2,SERPINE2,HMGA2,SOD2,LDLR,CNKSR3,TNFAIP3	1.47e-10	6.49e-09	negative regulation of response to stimulus
Process	GO.1903037	19	278	9606	9606.ENSP00000161559,9606.ENSP00000220751,9606.ENSP00000225831,9606.ENSP00000228534,9606.ENSP00000245414,9606.ENSP00000263341,9606.ENSP00000264832,9606.ENSP00000294728,9606.ENSP00000296861,9606.ENSP00000325663,9606.ENSP00000338157,9606.ENSP00000362179,9606.ENSP00000365048,9606.ENSP00000376436,9606.ENSP00000385675,9606.ENSP00000391676,9606.ENSP00000392025,9606.ENSP00000398632,9606.ENSP00000453302	CEACAM1,RIPK2,CCL2,IL23A,IRF1,IL1B,ICAM1,VCAM1,TNFRSF21,NFKBIZ,ZBTB16,ZC3H12A,TNFSF13B,ETS1,IL6,JAK3,CYLD,CD44,ADAM8	1.83e-10	7.99e-09	regulation of leukocyte cell-cell adhesion
Process	GO.0022603	34	961	9606	9606.ENSP00000006053,9606.ENSP00000161559,9606.ENSP00000225831,9606.ENSP00000245907,9606.ENSP00000252809,9606.ENSP00000259206,9606.ENSP00000260356,9606.ENSP00000263339,9606.ENSP00000263341,9606.ENSP00000263923,9606.ENSP00000264832,9606.ENSP00000265361,9606.ENSP00000265362,9606.ENSP00000297316,9606.ENSP00000313391,9606.ENSP00000314897,9606.ENSP00000326888,9606.ENSP00000340998,9606.ENSP00000355249,…	CX3CL1,CEACAM1,CCL2,C3,GDF15,IL1RN,THBS1,IL1A,IL1B,KDR,ICAM1,SEMA3C,SEMA3A,SOX17,DAB2,ANGPT2,LIMS2,NTN4,E2F2,SEMA6C,GBP1,ZC3H12A,TNFSF13B,ID1,B4GALT1,MSX1,PID1,ETS1,IL6,CD44,PHLDB2,HDAC9,HMGA2,TNFAIP3	3.53e-10	1.53e-08	regulation of anatomical structure morphogenesis
Process	GO.0071396	24	486	9606	9606.ENSP00000216797,9606.ENSP00000220751,9606.ENSP00000225474,9606.ENSP00000225831,9606.ENSP00000226317,9606.ENSP00000226574,9606.ENSP00000242208,9606.ENSP00000256458,9606.ENSP00000260010,9606.ENSP00000263341,9606.ENSP00000264832,9606.ENSP00000295522,9606.ENSP00000296585,9606.ENSP00000317891,9606.ENSP00000322706,9606.ENSP00000344479,9606.ENSP00000351671,9606.ENSP00000362179,9606.ENSP00000375795,…	NFKBIA,RIPK2,CSF3,CCL2,CXCL6,NFKB1,INHBA,IRAK2,TLR2,IL1B,ICAM1,CLDN1,ITGA2,TNIP1,HMGCS1,NR4A2,CCL20,ZC3H12A,IL24,PID1,BCL2L11,IL6,LDLR,TNFAIP3	3.81e-10	1.63e-08	cellular response to lipid
Process	GO.0006935	24	491	9606	9606.ENSP00000005257,9606.ENSP00000006053,9606.ENSP00000225831,9606.ENSP00000226317,9606.ENSP00000263341,9606.ENSP00000265361,9606.ENSP00000265362,9606.ENSP00000284136,9606.ENSP00000294728,9606.ENSP00000296026,9606.ENSP00000296027,9606.ENSP00000339328,9606.ENSP00000340998,9606.ENSP00000351671,9606.ENSP00000356357,9606.ENSP00000357909,9606.ENSP00000361850,9606.ENSP00000379038,9606.ENSP00000379110,…	RALA,CX3CL1,CCL2,CXCL6,IL1B,SEMA3C,SEMA3A,SEMA3D,VCAM1,CXCL3,CXCL5,PLAUR,NTN4,CCL20,LHX9,SEMA6C,PLAU,TYMP,CXCL1,IL6,DOCK4,CXCL2,SAA2,ADAM8	4.64e-10	1.96e-08	chemotaxis
Process	GO.0050778	26	589	9606	9606.ENSP00000216797,9606.ENSP00000220751,9606.ENSP00000221452,9606.ENSP00000226574,9606.ENSP00000228534,9606.ENSP00000245907,9606.ENSP00000251642,9606.ENSP00000256458,9606.ENSP00000260010,9606.ENSP00000263341,9606.ENSP00000263642,9606.ENSP00000296861,9606.ENSP00000299663,9606.ENSP00000317891,9606.ENSP00000325663,9606.ENSP00000330696,9606.ENSP00000357981,9606.ENSP00000359488,9606.ENSP00000362179,…	NFKBIA,RIPK2,RELB,NFKB1,IL23A,C3,DHX58,IRAK2,TLR2,IL1B,IFIH1,TNFRSF21,CLEC4E,TNIP1,NFKBIZ,P2RX7,CTSS,GBP5,ZC3H12A,TNFSF13B,DDX58,IL6,CYLD,C1R,ADAM8,TNFAIP3	6.66e-10	2.76e-08	positive regulation of immune response
Process	GO.2000026	49	1876	9606	9606.ENSP00000006053,9606.ENSP00000161559,9606.ENSP00000216797,9606.ENSP00000220751,9606.ENSP00000225474,9606.ENSP00000228534,9606.ENSP00000242208,9606.ENSP00000245414,9606.ENSP00000245907,9606.ENSP00000254958,9606.ENSP00000256759,9606.ENSP00000259206,9606.ENSP00000260010,9606.ENSP00000260356,9606.ENSP00000263339,9606.ENSP00000263341,9606.ENSP00000263923,9606.ENSP00000265361,9606.ENSP00000265362,…	CX3CL1,CEACAM1,NFKBIA,RIPK2,CSF3,IL23A,INHBA,IRF1,C3,JAG1,FST,IL1RN,TLR2,THBS1,IL1A,IL1B,KDR,SEMA3C,SEMA3A,CA2,TNFRSF21,SOX17,DAB2,ANGPT2,NFKBIZ,LIMS2,P2RX7,ZBTB16,NTN4,E2F2,SEMA6C,TSC22D3,ZC3H12A,ID1,B4GALT1,MSX1,ETS1,TYMP,IL6,JAK3,CYLD,PHLDB2,HDAC9,SERPINE2,HMGA2,SOD2,ADAM8,LDLR,TNFAIP3	7.51e-10	3.08e-08	regulation of multicellular organismal development
Process	GO.0050729	13	120	9606	9606.ENSP00000006053,9606.ENSP00000216797,9606.ENSP00000228534,9606.ENSP00000245907,9606.ENSP00000260010,9606.ENSP00000263341,9606.ENSP00000296585,9606.ENSP00000317891,9606.ENSP00000359488,9606.ENSP00000376436,9606.ENSP00000385675,9606.ENSP00000453302,9606.ENSP00000454071	CX3CL1,NFKBIA,IL23A,C3,TLR2,IL1B,ITGA2,TNIP1,GBP5,ETS1,IL6,ADAM8,LDLR	9.15e-10	3.72e-08	positive regulation of inflammatory response
Process	GO.0022409	17	238	9606	9606.ENSP00000006053,9606.ENSP00000220751,9606.ENSP00000225831,9606.ENSP00000228534,9606.ENSP00000263341,9606.ENSP00000264832,9606.ENSP00000294728,9606.ENSP00000325663,9606.ENSP00000338157,9606.ENSP00000360296,9606.ENSP00000365048,9606.ENSP00000376436,9606.ENSP00000385675,9606.ENSP00000391676,9606.ENSP00000392025,9606.ENSP00000398632,9606.ENSP00000453302	CX3CL1,RIPK2,CCL2,IL23A,IL1B,ICAM1,VCAM1,NFKBIZ,ZBTB16,PPAP2B,TNFSF13B,ETS1,IL6,JAK3,CYLD,CD44,ADAM8	9.24e-10	3.72e-08	positive regulation of cell-cell adhesion
Process	GO.0045321	32	894	9606	9606.ENSP00000004531,9606.ENSP00000006053,9606.ENSP00000161559,9606.ENSP00000220751,9606.ENSP00000221452,9606.ENSP00000226317,9606.ENSP00000226574,9606.ENSP00000228534,9606.ENSP00000243347,9606.ENSP00000245414,9606.ENSP00000245907,9606.ENSP00000246006,9606.ENSP00000260010,9606.ENSP00000264832,9606.ENSP00000294728,9606.ENSP00000295927,9606.ENSP00000299663,9606.ENSP00000330696,9606.ENSP00000334928,…	SLC7A2,CX3CL1,CEACAM1,RIPK2,RELB,CXCL6,NFKB1,IL23A,TNFAIP6,IRF1,C3,CD93,TLR2,ICAM1,VCAM1,PTX3,CLEC4E,P2RX7,PTPRB,PLAUR,CTSS,PLAU,B4GALT1,DSP,CXCL1,IL6,JAK3,CYLD,CD44,HDAC9,POU2F2,ADAM8	9.52e-10	3.8e-08	leukocyte activation
Process	GO.0002831	22	426	9606	9606.ENSP00000161559,9606.ENSP00000216797,9606.ENSP00000220751,9606.ENSP00000221452,9606.ENSP00000226574,9606.ENSP00000228534,9606.ENSP00000245414,9606.ENSP00000251642,9606.ENSP00000256458,9606.ENSP00000260010,9606.ENSP00000263341,9606.ENSP00000263464,9606.ENSP00000263642,9606.ENSP00000299663,9606.ENSP00000317891,9606.ENSP00000357981,9606.ENSP00000359488,9606.ENSP00000362179,9606.ENSP00000369213,…	CEACAM1,NFKBIA,RIPK2,RELB,NFKB1,IL23A,IRF1,DHX58,IRAK2,TLR2,IL1B,BIRC3,IFIH1,CLEC4E,TNIP1,CTSS,GBP5,ZC3H12A,DDX58,CYLD,ADAM8,TNFAIP3	9.84e-10	3.88e-08	regulation of response to biotic stimulus
Process	GO.0042493	32	900	9606	9606.ENSP00000004531,9606.ENSP00000216797,9606.ENSP00000220751,9606.ENSP00000225474,9606.ENSP00000226574,9606.ENSP00000242208,9606.ENSP00000245185,9606.ENSP00000254958,9606.ENSP00000260010,9606.ENSP00000260356,9606.ENSP00000263341,9606.ENSP00000263923,9606.ENSP00000264832,9606.ENSP00000265361,9606.ENSP00000275015,9606.ENSP00000285379,9606.ENSP00000287814,9606.ENSP00000294728,9606.ENSP00000295522,…	SLC7A2,NFKBIA,RIPK2,CSF3,NFKB1,INHBA,MT2A,JAG1,TLR2,THBS1,IL1B,KDR,ICAM1,SEMA3C,NFKBIE,CA2,TIMP4,VCAM1,CLDN1,ITGA2,HMGCS1,P2RX7,NR4A2,SLC16A12,ZC3H12A,ID1,MSX1,ETS1,IL18BP,IL6,HDAC9,TNFAIP3	1.12e-09	4.37e-08	response to drug
Process	GO.0006928	40	1355	9606	9606.ENSP00000006053,9606.ENSP00000161559,9606.ENSP00000220809,9606.ENSP00000225831,9606.ENSP00000226317,9606.ENSP00000243457,9606.ENSP00000260356,9606.ENSP00000263341,9606.ENSP00000263923,9606.ENSP00000264832,9606.ENSP00000265361,9606.ENSP00000265362,9606.ENSP00000294728,9606.ENSP00000296026,9606.ENSP00000296027,9606.ENSP00000296585,9606.ENSP00000297316,9606.ENSP00000314897,9606.ENSP00000331736,…	CX3CL1,CEACAM1,PLAT,CCL2,CXCL6,KCNJ2,THBS1,IL1B,KDR,ICAM1,SEMA3C,SEMA3A,VCAM1,CXCL3,CXCL5,ITGA2,SOX17,ANGPT2,SELE,NTN4,NR4A2,CCL20,LHX9,SEMA6C,PPAP2B,PLAU,ID1,RPGR,B4GALT1,MYO1B,ETS1,CXCL1,IL6,PSTPIP2,JAK3,CD44,DOCK4,CXCL2,SAA2,ADAM8	1.4e-09	5.41e-08	movement of cell or subcellular component
Process	GO.0001818	17	245	9606	9606.ENSP00000161559,9606.ENSP00000221452,9606.ENSP00000226574,9606.ENSP00000228534,9606.ENSP00000242208,9606.ENSP00000251642,9606.ENSP00000260356,9606.ENSP00000263642,9606.ENSP00000296861,9606.ENSP00000359504,9606.ENSP00000362179,9606.ENSP00000369213,9606.ENSP00000381007,9606.ENSP00000385675,9606.ENSP00000391676,9606.ENSP00000392025,9606.ENSP00000481570	CEACAM1,RELB,NFKB1,IL23A,INHBA,DHX58,THBS1,IFIH1,TNFRSF21,GBP1,ZC3H12A,DDX58,NAV3,IL6,JAK3,CYLD,TNFAIP3	1.4e-09	5.41e-08	negative regulation of cytokine production
Process	GO.0002687	13	127	9606	9606.ENSP00000226317,9606.ENSP00000228534,9606.ENSP00000260356,9606.ENSP00000263339,9606.ENSP00000264832,9606.ENSP00000296026,9606.ENSP00000296027,9606.ENSP00000296585,9606.ENSP00000351671,9606.ENSP00000379110,9606.ENSP00000385675,9606.ENSP00000427279,9606.ENSP00000453302	CXCL6,IL23A,THBS1,IL1A,ICAM1,CXCL3,CXCL5,ITGA2,CCL20,CXCL1,IL6,CXCL2,ADAM8	1.73e-09	6.58e-08	positive regulation of leukocyte migration
Process	GO.0051090	21	403	9606	9606.ENSP00000216797,9606.ENSP00000220751,9606.ENSP00000225474,9606.ENSP00000226574,9606.ENSP00000256458,9606.ENSP00000256495,9606.ENSP00000260010,9606.ENSP00000263341,9606.ENSP00000264832,9606.ENSP00000275015,9606.ENSP00000358983,9606.ENSP00000360296,9606.ENSP00000362179,9606.ENSP00000362994,9606.ENSP00000365280,9606.ENSP00000369213,9606.ENSP00000369299,9606.ENSP00000385675,9606.ENSP00000392025,…	NFKBIA,RIPK2,CSF3,NFKB1,IRAK2,BHLHE40,TLR2,IL1B,ICAM1,NFKBIE,NFKB2,PPAP2B,ZC3H12A,TRAF1,ID1,DDX58,TRIM22,IL6,CYLD,ADAM8,TNFAIP3	2.08e-09	7.84e-08	regulation of DNA-binding transcription factor activity
Process	GO.1902531	46	1764	9606	9606.ENSP00000006053,9606.ENSP00000161559,9606.ENSP00000216797,9606.ENSP00000220751,9606.ENSP00000225474,9606.ENSP00000225831,9606.ENSP00000228280,9606.ENSP00000228534,9606.ENSP00000240100,9606.ENSP00000241261,9606.ENSP00000242208,9606.ENSP00000251642,9606.ENSP00000252809,9606.ENSP00000256458,9606.ENSP00000259874,9606.ENSP00000260010,9606.ENSP00000260356,9606.ENSP00000263341,9606.ENSP00000263464,…	CX3CL1,CEACAM1,NFKBIA,RIPK2,CSF3,CCL2,KITLG,IL23A,DUSP4,TNFSF10,INHBA,DHX58,GDF15,IRAK2,IER3,TLR2,THBS1,IL1B,BIRC3,KDR,ICAM1,RASGRF2,SEMA3A,FGF5,TNIP1,P2RX7,PLAUR,BMF,CCL20,GBP1,ZC3H12A,ID1,TRIM22,MSX1,IL24,BCL2L11,IL6,JAK3,CYLD,CD44,SERPINE2,PDGFC,SOD2,ADAM8,CNKSR3,TNFAIP3	3.03e-09	1.13e-07	regulation of intracellular signal transduction
Process	GO.0045785	20	375	9606	9606.ENSP00000006053,9606.ENSP00000220751,9606.ENSP00000225831,9606.ENSP00000228534,9606.ENSP00000263341,9606.ENSP00000263923,9606.ENSP00000264832,9606.ENSP00000284322,9606.ENSP00000294728,9606.ENSP00000296585,9606.ENSP00000325663,9606.ENSP00000338157,9606.ENSP00000360296,9606.ENSP00000365048,9606.ENSP00000376436,9606.ENSP00000385675,9606.ENSP00000391676,9606.ENSP00000392025,9606.ENSP00000398632,…	CX3CL1,RIPK2,CCL2,IL23A,IL1B,KDR,ICAM1,ABI3BP,VCAM1,ITGA2,NFKBIZ,ZBTB16,PPAP2B,TNFSF13B,ETS1,IL6,JAK3,CYLD,CD44,ADAM8	3.54e-09	1.31e-07	positive regulation of cell adhesion
Process	GO.0051094	38	1286	9606	9606.ENSP00000006053,9606.ENSP00000161559,9606.ENSP00000220751,9606.ENSP00000225474,9606.ENSP00000226574,9606.ENSP00000228534,9606.ENSP00000242208,9606.ENSP00000245907,9606.ENSP00000252809,9606.ENSP00000254958,9606.ENSP00000256759,9606.ENSP00000260010,9606.ENSP00000260356,9606.ENSP00000263339,9606.ENSP00000263341,9606.ENSP00000263923,9606.ENSP00000265361,9606.ENSP00000265362,9606.ENSP00000285379,…	CX3CL1,CEACAM1,RIPK2,CSF3,NFKB1,IL23A,INHBA,C3,GDF15,JAG1,FST,TLR2,THBS1,IL1A,IL1B,KDR,SEMA3C,SEMA3A,CA2,SOX17,DAB2,ANGPT2,NFKBIZ,P2RX7,ZBTB16,ZC3H12A,TNFSF13B,B4GALT1,ETS1,IL6,CYLD,PHLDB2,HDAC9,SERPINE2,HMGA2,SOD2,ADAM8,TNFAIP3	3.81e-09	1.4e-07	positive regulation of developmental process
Process	GO.0009615	17	270	9606	9606.ENSP00000228534,9606.ENSP00000234111,9606.ENSP00000245414,9606.ENSP00000251642,9606.ENSP00000257570,9606.ENSP00000259030,9606.ENSP00000263642,9606.ENSP00000359504,9606.ENSP00000359512,9606.ENSP00000360883,9606.ENSP00000360891,9606.ENSP00000362179,9606.ENSP00000369213,9606.ENSP00000369299,9606.ENSP00000376943,9606.ENSP00000385675,9606.ENSP00000437621	IL23A,ODC1,IRF1,DHX58,OASL,RTP4,IFIH1,GBP1,GBP3,IFIT3,IFIT2,ZC3H12A,DDX58,TRIM22,BCL2L11,IL6,HMGA2	5.54e-09	2.01e-07	response to virus
Process	GO.1903039	15	202	9606	9606.ENSP00000220751,9606.ENSP00000225831,9606.ENSP00000228534,9606.ENSP00000263341,9606.ENSP00000264832,9606.ENSP00000294728,9606.ENSP00000325663,9606.ENSP00000338157,9606.ENSP00000365048,9606.ENSP00000376436,9606.ENSP00000385675,9606.ENSP00000391676,9606.ENSP00000392025,9606.ENSP00000398632,9606.ENSP00000453302	RIPK2,CCL2,IL23A,IL1B,ICAM1,VCAM1,NFKBIZ,ZBTB16,TNFSF13B,ETS1,IL6,JAK3,CYLD,CD44,ADAM8	5.71e-09	2.06e-07	positive regulation of leukocyte cell-cell adhesion
Process	GO.0008219	34	1080	9606	9606.ENSP00000216797,9606.ENSP00000220751,9606.ENSP00000226574,9606.ENSP00000241261,9606.ENSP00000242208,9606.ENSP00000245414,9606.ENSP00000258534,9606.ENSP00000259874,9606.ENSP00000260010,9606.ENSP00000263339,9606.ENSP00000263341,9606.ENSP00000263464,9606.ENSP00000265362,9606.ENSP00000266671,9606.ENSP00000296861,9606.ENSP00000313391,9606.ENSP00000330696,9606.ENSP00000338157,9606.ENSP00000346697,…	NFKBIA,RIPK2,NFKB1,TNFSF10,INHBA,IRF1,DRAM1,IER3,TLR2,IL1A,IL1B,BIRC3,SEMA3A,PHLDA1,TNFRSF21,DAB2,P2RX7,ZBTB16,BMF,CACNA1A,E2F2,G0S2,NUAK2,IFIT2,ZC3H12A,TRAF1,DSP,IL24,BCL2L11,IL6,CYLD,TNFAIP8,SOD2,TNFAIP3	6.36e-09	2.26e-07	cell death
Process	GO.0006915	31	915	9606	9606.ENSP00000216797,9606.ENSP00000220751,9606.ENSP00000226574,9606.ENSP00000241261,9606.ENSP00000242208,9606.ENSP00000245414,9606.ENSP00000258534,9606.ENSP00000259874,9606.ENSP00000260010,9606.ENSP00000263339,9606.ENSP00000263341,9606.ENSP00000263464,9606.ENSP00000265362,9606.ENSP00000266671,9606.ENSP00000296861,9606.ENSP00000313391,9606.ENSP00000330696,9606.ENSP00000338157,9606.ENSP00000346697,…	NFKBIA,RIPK2,NFKB1,TNFSF10,INHBA,IRF1,DRAM1,IER3,TLR2,IL1A,IL1B,BIRC3,SEMA3A,PHLDA1,TNFRSF21,DAB2,P2RX7,ZBTB16,BMF,E2F2,G0S2,NUAK2,IFIT2,ZC3H12A,TRAF1,IL24,BCL2L11,IL6,TNFAIP8,SOD2,TNFAIP3	6.33e-09	2.26e-07	apoptotic process
Process	GO.0001775	33	1024	9606	9606.ENSP00000004531,9606.ENSP00000006053,9606.ENSP00000161559,9606.ENSP00000220751,9606.ENSP00000221452,9606.ENSP00000226317,9606.ENSP00000226574,9606.ENSP00000228534,9606.ENSP00000243347,9606.ENSP00000245414,9606.ENSP00000245907,9606.ENSP00000246006,9606.ENSP00000260010,9606.ENSP00000264832,9606.ENSP00000294728,9606.ENSP00000295927,9606.ENSP00000299663,9606.ENSP00000330696,9606.ENSP00000334928,…	SLC7A2,CX3CL1,CEACAM1,RIPK2,RELB,CXCL6,NFKB1,IL23A,TNFAIP6,IRF1,C3,CD93,TLR2,ICAM1,VCAM1,PTX3,CLEC4E,P2RX7,PTPRB,PLAUR,CTSS,NFKB2,PLAU,B4GALT1,DSP,CXCL1,IL6,JAK3,CYLD,CD44,HDAC9,POU2F2,ADAM8	6.32e-09	2.26e-07	cell activation
Process	GO.0001819	20	390	9606	9606.ENSP00000006053,9606.ENSP00000220751,9606.ENSP00000226574,9606.ENSP00000228534,9606.ENSP00000245414,9606.ENSP00000245907,9606.ENSP00000251642,9606.ENSP00000260010,9606.ENSP00000260356,9606.ENSP00000263339,9606.ENSP00000263341,9606.ENSP00000263642,9606.ENSP00000299663,9606.ENSP00000330696,9606.ENSP00000351671,9606.ENSP00000358983,9606.ENSP00000359488,9606.ENSP00000369213,9606.ENSP00000385675,…	CX3CL1,RIPK2,NFKB1,IL23A,IRF1,C3,DHX58,TLR2,THBS1,IL1A,IL1B,IFIH1,CLEC4E,P2RX7,CCL20,NFKB2,GBP5,DDX58,IL6,ADAM8	6.66e-09	2.32e-07	positive regulation of cytokine production
Process	GO.0048731	78	4144	9606	9606.ENSP00000005257,9606.ENSP00000006053,9606.ENSP00000161559,9606.ENSP00000216797,9606.ENSP00000221452,9606.ENSP00000225474,9606.ENSP00000225831,9606.ENSP00000228280,9606.ENSP00000234111,9606.ENSP00000241261,9606.ENSP00000242208,9606.ENSP00000245414,9606.ENSP00000254958,9606.ENSP00000256759,9606.ENSP00000260010,9606.ENSP00000260356,9606.ENSP00000263923,9606.ENSP00000264144,9606.ENSP00000264346,…	RALA,CX3CL1,CEACAM1,NFKBIA,RELB,CSF3,CCL2,KITLG,ODC1,TNFSF10,INHBA,IRF1,JAG1,FST,TLR2,THBS1,KDR,LAMC2,HERC6,ICAM1,NPR3,STC2,SEMA3C,SEMA3A,SEMA3D,CA2,TIMP4,SMAD6,VCAM1,CLDN1,HHIP,ITGA2,TNFRSF21,SOX17,CLEC4E,FGF5,ANGPT2,HMGCS1,P2RX7,PTPRB,ZBTB16,NTN4,ETV7,RAPGEF5,NR4A2,HAPLN3,LHX9,SEMA6C,NFKB2,NFIA,ZC3H12A,ID1,NEBL,SAT1,B4GALT1,DSP,ADAMTS6,ESM1,SDCBP2,MSX1,ETS1,BCL2L11,TYMP,CXCL1,IL6,JAK3,CYLD,CD44…	7.29e-09	2.52e-07	system development
Process	GO.0002685	14	175	9606	9606.ENSP00000225831,9606.ENSP00000226317,9606.ENSP00000228534,9606.ENSP00000260356,9606.ENSP00000263339,9606.ENSP00000264832,9606.ENSP00000296026,9606.ENSP00000296027,9606.ENSP00000296585,9606.ENSP00000351671,9606.ENSP00000379110,9606.ENSP00000385675,9606.ENSP00000427279,9606.ENSP00000453302	CCL2,CXCL6,IL23A,THBS1,IL1A,ICAM1,CXCL3,CXCL5,ITGA2,CCL20,CXCL1,IL6,CXCL2,ADAM8	7.73e-09	2.65e-07	regulation of leukocyte migration
Process	GO.1902624	8	34	9606	9606.ENSP00000226317,9606.ENSP00000228534,9606.ENSP00000263339,9606.ENSP00000296026,9606.ENSP00000296027,9606.ENSP00000379110,9606.ENSP00000427279,9606.ENSP00000453302	CXCL6,IL23A,IL1A,CXCL3,CXCL5,CXCL1,CXCL2,ADAM8	8.07e-09	2.74e-07	positive regulation of neutrophil migration
Process	GO.0010647	43	1631	9606	9606.ENSP00000006053,9606.ENSP00000220751,9606.ENSP00000225474,9606.ENSP00000225831,9606.ENSP00000226574,9606.ENSP00000228280,9606.ENSP00000228534,9606.ENSP00000241261,9606.ENSP00000242208,9606.ENSP00000245907,9606.ENSP00000251642,9606.ENSP00000252809,9606.ENSP00000254958,9606.ENSP00000256458,9606.ENSP00000260010,9606.ENSP00000260356,9606.ENSP00000263341,9606.ENSP00000263464,9606.ENSP00000263923,…	CX3CL1,RIPK2,CSF3,CCL2,NFKB1,KITLG,IL23A,TNFSF10,INHBA,C3,DHX58,GDF15,JAG1,IRAK2,TLR2,THBS1,IL1B,BIRC3,KDR,ICAM1,SEMA3A,CA2,ITGA2,FGF5,DAB2,LIMS2,P2RX7,PLAUR,BMF,CCL20,G0S2,ZC3H12A,TRIM22,ESM1,MSX1,IL24,BCL2L11,IL6,CYLD,CD44,SERPINE2,PDGFC,ADAM8	8.26e-09	2.78e-07	positive regulation of cell communication
Process	GO.0002819	13	147	9606	9606.ENSP00000161559,9606.ENSP00000220751,9606.ENSP00000228534,9606.ENSP00000245414,9606.ENSP00000245907,9606.ENSP00000263341,9606.ENSP00000325663,9606.ENSP00000330696,9606.ENSP00000362179,9606.ENSP00000365048,9606.ENSP00000385675,9606.ENSP00000391676,9606.ENSP00000481570	CEACAM1,RIPK2,IL23A,IRF1,C3,IL1B,NFKBIZ,P2RX7,ZC3H12A,TNFSF13B,IL6,JAK3,TNFAIP3	8.86e-09	2.96e-07	regulation of adaptive immune response
Process	GO.0023056	43	1638	9606	9606.ENSP00000006053,9606.ENSP00000220751,9606.ENSP00000225474,9606.ENSP00000225831,9606.ENSP00000226574,9606.ENSP00000228280,9606.ENSP00000228534,9606.ENSP00000241261,9606.ENSP00000242208,9606.ENSP00000245907,9606.ENSP00000251642,9606.ENSP00000252809,9606.ENSP00000254958,9606.ENSP00000256458,9606.ENSP00000260010,9606.ENSP00000260356,9606.ENSP00000263341,9606.ENSP00000263464,9606.ENSP00000263923,…	CX3CL1,RIPK2,CSF3,CCL2,NFKB1,KITLG,IL23A,TNFSF10,INHBA,C3,DHX58,GDF15,JAG1,IRAK2,TLR2,THBS1,IL1B,BIRC3,KDR,ICAM1,SEMA3A,CA2,ITGA2,FGF5,DAB2,LIMS2,P2RX7,PLAUR,BMF,CCL20,G0S2,ZC3H12A,TRIM22,ESM1,MSX1,IL24,BCL2L11,IL6,CYLD,CD44,SERPINE2,PDGFC,ADAM8	9.34e-09	3.1e-07	positive regulation of signaling
Process	GO.0012501	33	1042	9606	9606.ENSP00000216797,9606.ENSP00000220751,9606.ENSP00000226574,9606.ENSP00000241261,9606.ENSP00000242208,9606.ENSP00000245414,9606.ENSP00000258534,9606.ENSP00000259874,9606.ENSP00000260010,9606.ENSP00000263339,9606.ENSP00000263341,9606.ENSP00000263464,9606.ENSP00000265362,9606.ENSP00000266671,9606.ENSP00000296861,9606.ENSP00000313391,9606.ENSP00000330696,9606.ENSP00000338157,9606.ENSP00000346697,…	NFKBIA,RIPK2,NFKB1,TNFSF10,INHBA,IRF1,DRAM1,IER3,TLR2,IL1A,IL1B,BIRC3,SEMA3A,PHLDA1,TNFRSF21,DAB2,P2RX7,ZBTB16,BMF,E2F2,G0S2,NUAK2,IFIT2,ZC3H12A,TRAF1,DSP,IL24,BCL2L11,IL6,CYLD,TNFAIP8,SOD2,TNFAIP3	9.55e-09	3.14e-07	programmed cell death
Process	GO.0045088	19	361	9606	9606.ENSP00000161559,9606.ENSP00000216797,9606.ENSP00000220751,9606.ENSP00000221452,9606.ENSP00000226574,9606.ENSP00000245414,9606.ENSP00000251642,9606.ENSP00000256458,9606.ENSP00000260010,9606.ENSP00000263464,9606.ENSP00000263642,9606.ENSP00000299663,9606.ENSP00000317891,9606.ENSP00000357981,9606.ENSP00000359488,9606.ENSP00000369213,9606.ENSP00000392025,9606.ENSP00000453302,9606.ENSP00000481570	CEACAM1,NFKBIA,RIPK2,RELB,NFKB1,IRF1,DHX58,IRAK2,TLR2,BIRC3,IFIH1,CLEC4E,TNIP1,CTSS,GBP5,DDX58,CYLD,ADAM8,TNFAIP3	1.09e-08	3.56e-07	regulation of innate immune response
Process	GO.0048646	29	831	9606	9606.ENSP00000005257,9606.ENSP00000006053,9606.ENSP00000161559,9606.ENSP00000225831,9606.ENSP00000240100,9606.ENSP00000242208,9606.ENSP00000254958,9606.ENSP00000260010,9606.ENSP00000260356,9606.ENSP00000263923,9606.ENSP00000265361,9606.ENSP00000296585,9606.ENSP00000297316,9606.ENSP00000314897,9606.ENSP00000334928,9606.ENSP00000358983,9606.ENSP00000362179,9606.ENSP00000365280,9606.ENSP00000366326,…	RALA,CX3CL1,CEACAM1,CCL2,DUSP4,INHBA,JAG1,TLR2,THBS1,KDR,SEMA3C,ITGA2,SOX17,ANGPT2,PTPRB,NFKB2,ZC3H12A,ID1,NEBL,SAT1,B4GALT1,ESM1,MSX1,ETS1,BCL2L11,TYMP,KBTBD8,HMGA2,ADAM8	1.11e-08	3.58e-07	anatomical structure formation involved in morphogenesis
Process	GO.0051607	14	181	9606	9606.ENSP00000228534,9606.ENSP00000245414,9606.ENSP00000251642,9606.ENSP00000257570,9606.ENSP00000259030,9606.ENSP00000263642,9606.ENSP00000359504,9606.ENSP00000359512,9606.ENSP00000360883,9606.ENSP00000360891,9606.ENSP00000362179,9606.ENSP00000369213,9606.ENSP00000369299,9606.ENSP00000385675	IL23A,IRF1,DHX58,OASL,RTP4,IFIH1,GBP1,GBP3,IFIT3,IFIT2,ZC3H12A,DDX58,TRIM22,IL6	1.15e-08	3.71e-07	defense response to virus
Process	GO.0051246	58	2668	9606	9606.ENSP00000006053,9606.ENSP00000161559,9606.ENSP00000216797,9606.ENSP00000220751,9606.ENSP00000220809,9606.ENSP00000222543,9606.ENSP00000225474,9606.ENSP00000225831,9606.ENSP00000226574,9606.ENSP00000228534,9606.ENSP00000234111,9606.ENSP00000240100,9606.ENSP00000241261,9606.ENSP00000242208,9606.ENSP00000245414,9606.ENSP00000245907,9606.ENSP00000252809,9606.ENSP00000256458,9606.ENSP00000260356,…	CX3CL1,CEACAM1,NFKBIA,RIPK2,PLAT,TFPI2,CSF3,CCL2,NFKB1,IL23A,ODC1,DUSP4,TNFSF10,INHBA,IRF1,C3,GDF15,IRAK2,THBS1,LIPG,IL1A,IL1B,BIRC3,KDR,ICAM1,SEMA3A,LAMP3,JDP2,TIMP4,SMAD6,PTX3,ITGA2,SOX17,DAB2,TNIP1,P2RX7,PLAUR,CCL20,GBP1,PPAP2B,ZC3H12A,ID1,IL24,PID1,BCL2L11,IL6,JAK3,CD44,KBTBD8,SERPINE2,PDGFC,TNFAIP8,C1R,FRY,ADAM8,LDLR,CNKSR3,TNFAIP3	1.19e-08	3.8e-07	regulation of protein metabolic process
Process	GO.0060326	14	183	9606	9606.ENSP00000006053,9606.ENSP00000225831,9606.ENSP00000226317,9606.ENSP00000263341,9606.ENSP00000294728,9606.ENSP00000296026,9606.ENSP00000296027,9606.ENSP00000351671,9606.ENSP00000379110,9606.ENSP00000385675,9606.ENSP00000404179,9606.ENSP00000427279,9606.ENSP00000436126,9606.ENSP00000453302	CX3CL1,CCL2,CXCL6,IL1B,VCAM1,CXCL3,CXCL5,CCL20,CXCL1,IL6,DOCK4,CXCL2,SAA2,ADAM8	1.31e-08	4.16e-07	cell chemotaxis
Process	GO.0050865	22	506	9606	9606.ENSP00000004531,9606.ENSP00000161559,9606.ENSP00000220751,9606.ENSP00000225831,9606.ENSP00000228534,9606.ENSP00000242208,9606.ENSP00000245414,9606.ENSP00000260356,9606.ENSP00000263341,9606.ENSP00000294728,9606.ENSP00000296861,9606.ENSP00000325663,9606.ENSP00000338157,9606.ENSP00000362179,9606.ENSP00000365048,9606.ENSP00000385675,9606.ENSP00000391676,9606.ENSP00000392025,9606.ENSP00000415786,…	SLC7A2,CEACAM1,RIPK2,CCL2,IL23A,INHBA,IRF1,THBS1,IL1B,VCAM1,TNFRSF21,NFKBIZ,ZBTB16,ZC3H12A,TNFSF13B,IL6,JAK3,CYLD,SERPINE2,ADAM8,LDLR,TNFAIP3	1.97e-08	6.19e-07	regulation of cell activation
Process	GO.0009967	40	1493	9606	9606.ENSP00000006053,9606.ENSP00000220751,9606.ENSP00000225474,9606.ENSP00000225831,9606.ENSP00000226574,9606.ENSP00000228280,9606.ENSP00000228534,9606.ENSP00000241261,9606.ENSP00000242208,9606.ENSP00000245907,9606.ENSP00000251642,9606.ENSP00000252809,9606.ENSP00000254958,9606.ENSP00000256458,9606.ENSP00000260010,9606.ENSP00000260356,9606.ENSP00000263341,9606.ENSP00000263464,9606.ENSP00000263923,…	CX3CL1,RIPK2,CSF3,CCL2,NFKB1,KITLG,IL23A,TNFSF10,INHBA,C3,DHX58,GDF15,JAG1,IRAK2,TLR2,THBS1,IL1B,BIRC3,KDR,ICAM1,SEMA3A,FGF5,DAB2,LIMS2,P2RX7,PLAUR,BMF,CCL20,G0S2,ZC3H12A,TRIM22,ESM1,MSX1,IL24,BCL2L11,IL6,CYLD,CD44,PDGFC,ADAM8	2e-08	6.25e-07	positive regulation of signal transduction
Process	GO.0045089	16	259	9606	9606.ENSP00000216797,9606.ENSP00000220751,9606.ENSP00000221452,9606.ENSP00000226574,9606.ENSP00000251642,9606.ENSP00000256458,9606.ENSP00000260010,9606.ENSP00000263642,9606.ENSP00000299663,9606.ENSP00000317891,9606.ENSP00000357981,9606.ENSP00000359488,9606.ENSP00000369213,9606.ENSP00000392025,9606.ENSP00000453302,9606.ENSP00000481570	NFKBIA,RIPK2,RELB,NFKB1,DHX58,IRAK2,TLR2,IFIH1,CLEC4E,TNIP1,CTSS,GBP5,DDX58,CYLD,ADAM8,TNFAIP3	2.04e-08	6.31e-07	positive regulation of innate immune response
Process	GO.0051093	30	910	9606	9606.ENSP00000161559,9606.ENSP00000216797,9606.ENSP00000242208,9606.ENSP00000245414,9606.ENSP00000252809,9606.ENSP00000254958,9606.ENSP00000260010,9606.ENSP00000260356,9606.ENSP00000265087,9606.ENSP00000265362,9606.ENSP00000267569,9606.ENSP00000288840,9606.ENSP00000296861,9606.ENSP00000297316,9606.ENSP00000314897,9606.ENSP00000326888,9606.ENSP00000338157,9606.ENSP00000355249,9606.ENSP00000357909,…	CEACAM1,NFKBIA,INHBA,IRF1,GDF15,JAG1,TLR2,THBS1,STC2,SEMA3A,JDP2,SMAD6,TNFRSF21,SOX17,ANGPT2,LIMS2,ZBTB16,E2F2,SEMA6C,GBP1,TSC22D3,ZC3H12A,ID1,MSX1,IL6,JAK3,CYLD,PHLDB2,HMGA2,LDLR	2.08e-08	6.33e-07	negative regulation of developmental process
Process	GO.0001525	17	297	9606	9606.ENSP00000006053,9606.ENSP00000161559,9606.ENSP00000225831,9606.ENSP00000254958,9606.ENSP00000260356,9606.ENSP00000263923,9606.ENSP00000297316,9606.ENSP00000314897,9606.ENSP00000334928,9606.ENSP00000362179,9606.ENSP00000365280,9606.ENSP00000368572,9606.ENSP00000369055,9606.ENSP00000370812,9606.ENSP00000376436,9606.ENSP00000379038,9606.ENSP00000453302	CX3CL1,CEACAM1,CCL2,JAG1,THBS1,KDR,SOX17,ANGPT2,PTPRB,ZC3H12A,ID1,SAT1,B4GALT1,ESM1,ETS1,TYMP,ADAM8	2.1e-08	6.36e-07	angiogenesis
Process	GO.0002694	21	470	9606	9606.ENSP00000004531,9606.ENSP00000161559,9606.ENSP00000220751,9606.ENSP00000225831,9606.ENSP00000228534,9606.ENSP00000242208,9606.ENSP00000245414,9606.ENSP00000260356,9606.ENSP00000263341,9606.ENSP00000294728,9606.ENSP00000296861,9606.ENSP00000325663,9606.ENSP00000338157,9606.ENSP00000362179,9606.ENSP00000365048,9606.ENSP00000385675,9606.ENSP00000391676,9606.ENSP00000392025,9606.ENSP00000453302,…	SLC7A2,CEACAM1,RIPK2,CCL2,IL23A,INHBA,IRF1,THBS1,IL1B,VCAM1,TNFRSF21,NFKBIZ,ZBTB16,ZC3H12A,TNFSF13B,IL6,JAK3,CYLD,ADAM8,LDLR,TNFAIP3	2.7e-08	8.12e-07	regulation of leukocyte activation
Process	GO.1901342	17	305	9606	9606.ENSP00000006053,9606.ENSP00000161559,9606.ENSP00000245907,9606.ENSP00000260356,9606.ENSP00000263339,9606.ENSP00000263341,9606.ENSP00000263923,9606.ENSP00000314897,9606.ENSP00000355249,9606.ENSP00000362179,9606.ENSP00000365280,9606.ENSP00000376436,9606.ENSP00000385675,9606.ENSP00000408617,9606.ENSP00000437621,9606.ENSP00000446252,9606.ENSP00000481570	CX3CL1,CEACAM1,C3,THBS1,IL1A,IL1B,KDR,ANGPT2,E2F2,ZC3H12A,ID1,ETS1,IL6,HDAC9,HMGA2,SOD2,TNFAIP3	3.04e-08	9.06e-07	regulation of vasculature development
Process	GO.0002822	12	135	9606	9606.ENSP00000161559,9606.ENSP00000220751,9606.ENSP00000228534,9606.ENSP00000245907,9606.ENSP00000263341,9606.ENSP00000325663,9606.ENSP00000330696,9606.ENSP00000362179,9606.ENSP00000365048,9606.ENSP00000385675,9606.ENSP00000391676,9606.ENSP00000481570	CEACAM1,RIPK2,IL23A,C3,IL1B,NFKBIZ,P2RX7,ZC3H12A,TNFSF13B,IL6,JAK3,TNFAIP3	3.18e-08	9.43e-07	regulation of adaptive immune response based on somatic recombination of immune receptors built from immunoglobulin superfamily domains
Process	GO.0032102	17	310	9606	9606.ENSP00000161559,9606.ENSP00000220809,9606.ENSP00000225831,9606.ENSP00000226574,9606.ENSP00000243347,9606.ENSP00000251642,9606.ENSP00000260356,9606.ENSP00000265362,9606.ENSP00000314897,9606.ENSP00000339328,9606.ENSP00000361850,9606.ENSP00000362179,9606.ENSP00000376436,9606.ENSP00000405405,9606.ENSP00000415786,9606.ENSP00000454071,9606.ENSP00000481570	CEACAM1,PLAT,CCL2,NFKB1,TNFAIP6,DHX58,THBS1,SEMA3A,ANGPT2,PLAUR,PLAU,ZC3H12A,ETS1,PHLDB2,SERPINE2,LDLR,TNFAIP3	3.8e-08	1.12e-06	negative regulation of response to external stimulus
Process	GO.0002758	13	168	9606	9606.ENSP00000216797,9606.ENSP00000220751,9606.ENSP00000221452,9606.ENSP00000226574,9606.ENSP00000256458,9606.ENSP00000260010,9606.ENSP00000263642,9606.ENSP00000299663,9606.ENSP00000317891,9606.ENSP00000357981,9606.ENSP00000369213,9606.ENSP00000392025,9606.ENSP00000481570	NFKBIA,RIPK2,RELB,NFKB1,IRAK2,TLR2,IFIH1,CLEC4E,TNIP1,CTSS,DDX58,CYLD,TNFAIP3	3.89e-08	1.13e-06	innate immune response-activating signal transduction
Process	GO.0009653	47	1992	9606	9606.ENSP00000005257,9606.ENSP00000006053,9606.ENSP00000161559,9606.ENSP00000225831,9606.ENSP00000240100,9606.ENSP00000242208,9606.ENSP00000254958,9606.ENSP00000259874,9606.ENSP00000260010,9606.ENSP00000260356,9606.ENSP00000263923,9606.ENSP00000265361,9606.ENSP00000265362,9606.ENSP00000285379,9606.ENSP00000288840,9606.ENSP00000296575,9606.ENSP00000296585,9606.ENSP00000297316,9606.ENSP00000314897,…	RALA,CX3CL1,CEACAM1,CCL2,DUSP4,INHBA,JAG1,IER3,TLR2,THBS1,KDR,SEMA3C,SEMA3A,CA2,SMAD6,HHIP,ITGA2,SOX17,ANGPT2,P2RX7,PTPRB,ZBTB16,NTN4,ETV7,NR4A2,LHX9,SEMA6C,NFKB2,ZC3H12A,ID1,NEBL,SAT1,B4GALT1,DSP,ESM1,MSX1,PID1,ETS1,BCL2L11,TYMP,CD44,KBTBD8,SERPINE2,PDGFC,HMGA2,FRY,ADAM8	4.2e-08	1.22e-06	anatomical structure morphogenesis
Process	GO.0007275	83	4726	9606	9606.ENSP00000005257,9606.ENSP00000006053,9606.ENSP00000161559,9606.ENSP00000216797,9606.ENSP00000221452,9606.ENSP00000225474,9606.ENSP00000225831,9606.ENSP00000228280,9606.ENSP00000234111,9606.ENSP00000240100,9606.ENSP00000241261,9606.ENSP00000242208,9606.ENSP00000245414,9606.ENSP00000254958,9606.ENSP00000256759,9606.ENSP00000260010,9606.ENSP00000260356,9606.ENSP00000263341,9606.ENSP00000263923,…	RALA,CX3CL1,CEACAM1,NFKBIA,RELB,CSF3,CCL2,KITLG,ODC1,DUSP4,TNFSF10,INHBA,IRF1,JAG1,FST,TLR2,THBS1,IL1B,KDR,LAMC2,HERC6,ICAM1,NPR3,STC2,SEMA3C,SEMA3A,SEMA3D,CA2,TIMP4,SMAD6,VCAM1,CLDN1,HHIP,ITGA2,TNFRSF21,SOX17,CLEC4E,FGF5,DAB2,ANGPT2,HMGCS1,P2RX7,PTPRB,ZBTB16,NTN4,ETV7,RAPGEF5,NR4A2,WTAP,HAPLN3,LHX9,SEMA6C,NFKB2,NFIA,ZC3H12A,ANGPTL2,ID1,NEBL,SAT1,B4GALT1,DSP,ADAMTS6,ESM1,SDCBP2,MSX1,ETS1,BCL2L11,…	4.49e-08	1.29e-06	multicellular organism development
Process	GO.0032479	11	112	9606	9606.ENSP00000220751,9606.ENSP00000221452,9606.ENSP00000226574,9606.ENSP00000245414,9606.ENSP00000251642,9606.ENSP00000260010,9606.ENSP00000263642,9606.ENSP00000358983,9606.ENSP00000369213,9606.ENSP00000392025,9606.ENSP00000481570	RIPK2,RELB,NFKB1,IRF1,DHX58,TLR2,IFIH1,NFKB2,DDX58,CYLD,TNFAIP3	4.72e-08	1.35e-06	regulation of type I interferon production
Process	GO.0045765	16	277	9606	9606.ENSP00000006053,9606.ENSP00000161559,9606.ENSP00000245907,9606.ENSP00000260356,9606.ENSP00000263339,9606.ENSP00000263341,9606.ENSP00000263923,9606.ENSP00000314897,9606.ENSP00000355249,9606.ENSP00000362179,9606.ENSP00000365280,9606.ENSP00000376436,9606.ENSP00000385675,9606.ENSP00000408617,9606.ENSP00000437621,9606.ENSP00000481570	CX3CL1,CEACAM1,C3,THBS1,IL1A,IL1B,KDR,ANGPT2,E2F2,ZC3H12A,ID1,ETS1,IL6,HDAC9,HMGA2,TNFAIP3	4.94e-08	1.4e-06	regulation of angiogenesis
Process	GO.0048856	87	5085	9606	9606.ENSP00000005257,9606.ENSP00000006053,9606.ENSP00000161559,9606.ENSP00000216797,9606.ENSP00000221452,9606.ENSP00000225474,9606.ENSP00000225831,9606.ENSP00000228280,9606.ENSP00000234111,9606.ENSP00000240100,9606.ENSP00000241261,9606.ENSP00000242208,9606.ENSP00000245414,9606.ENSP00000252809,9606.ENSP00000254958,9606.ENSP00000256759,9606.ENSP00000259874,9606.ENSP00000260010,9606.ENSP00000260356,…	RALA,CX3CL1,CEACAM1,NFKBIA,RELB,CSF3,CCL2,KITLG,ODC1,DUSP4,TNFSF10,INHBA,IRF1,GDF15,JAG1,FST,IER3,TLR2,THBS1,IL1A,IL1B,KDR,LAMC2,HERC6,ICAM1,NPR3,STC2,SEMA3C,SEMA3A,SEMA3D,CA2,TIMP4,SMAD6,VCAM1,CLDN1,HHIP,ITGA2,TNFRSF21,SOX17,CLEC4E,FGF5,DAB2,ANGPT2,HMGCS1,P2RX7,PTPRB,ZBTB16,NTN4,ETV7,RAPGEF5,NR4A2,WTAP,HAPLN3,LHX9,SEMA6C,NFKB2,NFIA,ZC3H12A,ANGPTL2,ID1,NEBL,SAT1,B4GALT1,DSP,ADAMTS6,ESM1,SDCBP2,MS…	5.63e-08	1.58e-06	anatomical structure development
Process	GO.1902533	30	959	9606	9606.ENSP00000006053,9606.ENSP00000220751,9606.ENSP00000225474,9606.ENSP00000225831,9606.ENSP00000228280,9606.ENSP00000228534,9606.ENSP00000241261,9606.ENSP00000251642,9606.ENSP00000252809,9606.ENSP00000256458,9606.ENSP00000260010,9606.ENSP00000260356,9606.ENSP00000263341,9606.ENSP00000263464,9606.ENSP00000263923,9606.ENSP00000264832,9606.ENSP00000265362,9606.ENSP00000311697,9606.ENSP00000330696,…	CX3CL1,RIPK2,CSF3,CCL2,KITLG,IL23A,TNFSF10,DHX58,GDF15,IRAK2,TLR2,THBS1,IL1B,BIRC3,KDR,ICAM1,SEMA3A,FGF5,P2RX7,BMF,CCL20,ZC3H12A,TRIM22,MSX1,IL24,BCL2L11,IL6,CD44,PDGFC,ADAM8	6.4e-08	1.78e-06	positive regulation of intracellular signal transduction
Process	GO.0051172	51	2307	9606	9606.ENSP00000161559,9606.ENSP00000220809,9606.ENSP00000221452,9606.ENSP00000222543,9606.ENSP00000226574,9606.ENSP00000240100,9606.ENSP00000242208,9606.ENSP00000245414,9606.ENSP00000245907,9606.ENSP00000256495,9606.ENSP00000256759,9606.ENSP00000260356,9606.ENSP00000263341,9606.ENSP00000263464,9606.ENSP00000265598,9606.ENSP00000267569,9606.ENSP00000287814,9606.ENSP00000288840,9606.ENSP00000293805,…	CEACAM1,PLAT,RELB,TFPI2,NFKB1,DUSP4,INHBA,IRF1,C3,BHLHE40,FST,THBS1,IL1B,BIRC3,LAMP3,JDP2,TIMP4,SMAD6,BCL6B,PTX3,SOX17,DAB2,TNIP1,P2RX7,MXD4,ZBTB16,PLAUR,ETV7,NR4A2,LHX9,NFKB2,GBP1,NFIA,PPAP2B,TSC22D3,ZC3H12A,ID1,TRIM22,MSX1,PID1,IL6,JAK3,CD44,HDAC9,SERPINE2,TNFAIP8,HMGA2,FRY,LDLR,CNKSR3,TNFAIP3	7.42e-08	2.05e-06	negative regulation of nitrogen compound metabolic process
Process	GO.1904018	13	179	9606	9606.ENSP00000006053,9606.ENSP00000161559,9606.ENSP00000245907,9606.ENSP00000260356,9606.ENSP00000263339,9606.ENSP00000263341,9606.ENSP00000263923,9606.ENSP00000314897,9606.ENSP00000362179,9606.ENSP00000376436,9606.ENSP00000408617,9606.ENSP00000437621,9606.ENSP00000446252	CX3CL1,CEACAM1,C3,THBS1,IL1A,IL1B,KDR,ANGPT2,ZC3H12A,ETS1,HDAC9,HMGA2,SOD2	7.8e-08	2.14e-06	positive regulation of vasculature development
Process	GO.0060333	9	69	9606	9606.ENSP00000245185,9606.ENSP00000245414,9606.ENSP00000257570,9606.ENSP00000264832,9606.ENSP00000294728,9606.ENSP00000359497,9606.ENSP00000359504,9606.ENSP00000369299,9606.ENSP00000398632	MT2A,IRF1,OASL,ICAM1,VCAM1,GBP2,GBP1,TRIM22,CD44	8.88e-08	2.42e-06	interferon-gamma-mediated signaling pathway
Process	GO.0042060	20	461	9606	9606.ENSP00000006053,9606.ENSP00000161559,9606.ENSP00000220809,9606.ENSP00000222543,9606.ENSP00000245414,9606.ENSP00000263339,9606.ENSP00000296585,9606.ENSP00000330696,9606.ENSP00000339328,9606.ENSP00000351671,9606.ENSP00000361850,9606.ENSP00000369055,9606.ENSP00000369129,9606.ENSP00000375795,9606.ENSP00000376436,9606.ENSP00000385675,9606.ENSP00000386881,9606.ENSP00000398632,9606.ENSP00000415786,…	CX3CL1,CEACAM1,PLAT,TFPI2,IRF1,IL1A,ITGA2,P2RX7,PLAUR,CCL20,PLAU,B4GALT1,DSP,IL24,ETS1,IL6,DYSF,CD44,SERPINE2,PDGFC	9.35e-08	2.53e-06	wound healing
Process	GO.0001568	20	464	9606	9606.ENSP00000006053,9606.ENSP00000161559,9606.ENSP00000225831,9606.ENSP00000254958,9606.ENSP00000260356,9606.ENSP00000263923,9606.ENSP00000265361,9606.ENSP00000288840,9606.ENSP00000297316,9606.ENSP00000314897,9606.ENSP00000334928,9606.ENSP00000362179,9606.ENSP00000365280,9606.ENSP00000368572,9606.ENSP00000369055,9606.ENSP00000370443,9606.ENSP00000370812,9606.ENSP00000376436,9606.ENSP00000379038,…	CX3CL1,CEACAM1,CCL2,JAG1,THBS1,KDR,SEMA3C,SMAD6,SOX17,ANGPT2,PTPRB,ZC3H12A,ID1,SAT1,B4GALT1,ADAMTS6,ESM1,ETS1,TYMP,ADAM8	1.03e-07	2.78e-06	blood vessel development
Process	GO.0002753	7	32	9606	9606.ENSP00000216797,9606.ENSP00000220751,9606.ENSP00000256458,9606.ENSP00000263642,9606.ENSP00000369213,9606.ENSP00000392025,9606.ENSP00000481570	NFKBIA,RIPK2,IRAK2,IFIH1,DDX58,CYLD,TNFAIP3	1.1e-07	2.96e-06	cytoplasmic pattern recognition receptor signaling pathway
Process	GO.0050920	13	188	9606	9606.ENSP00000225831,9606.ENSP00000226317,9606.ENSP00000228534,9606.ENSP00000260356,9606.ENSP00000263923,9606.ENSP00000265362,9606.ENSP00000296026,9606.ENSP00000296027,9606.ENSP00000296585,9606.ENSP00000314897,9606.ENSP00000379110,9606.ENSP00000385675,9606.ENSP00000427279	CCL2,CXCL6,IL23A,THBS1,KDR,SEMA3A,CXCL3,CXCL5,ITGA2,ANGPT2,CXCL1,IL6,CXCL2	1.33e-07	3.52e-06	regulation of chemotaxis
Process	GO.0008285	24	669	9606	9606.ENSP00000161559,9606.ENSP00000225831,9606.ENSP00000242208,9606.ENSP00000245414,9606.ENSP00000260010,9606.ENSP00000260356,9606.ENSP00000263339,9606.ENSP00000263341,9606.ENSP00000265074,9606.ENSP00000288840,9606.ENSP00000296861,9606.ENSP00000326888,9606.ENSP00000337889,9606.ENSP00000338157,9606.ENSP00000360883,9606.ENSP00000369055,9606.ENSP00000372170,9606.ENSP00000375795,9606.ENSP00000376436,…	CEACAM1,CCL2,INHBA,IRF1,TLR2,THBS1,IL1A,IL1B,NPR3,SMAD6,TNFRSF21,LIMS2,MXD4,ZBTB16,IFIT3,B4GALT1,MSX1,IL24,ETS1,CXCL1,IL6,SERPINE2,SOD2,TNFAIP3	1.41e-07	3.7e-06	negative regulation of cell population proliferation
Process	GO.0050863	16	302	9606	9606.ENSP00000161559,9606.ENSP00000220751,9606.ENSP00000225831,9606.ENSP00000228534,9606.ENSP00000245414,9606.ENSP00000263341,9606.ENSP00000294728,9606.ENSP00000296861,9606.ENSP00000325663,9606.ENSP00000338157,9606.ENSP00000362179,9606.ENSP00000365048,9606.ENSP00000385675,9606.ENSP00000391676,9606.ENSP00000392025,9606.ENSP00000453302	CEACAM1,RIPK2,CCL2,IL23A,IRF1,IL1B,VCAM1,TNFRSF21,NFKBIZ,ZBTB16,ZC3H12A,TNFSF13B,IL6,JAK3,CYLD,ADAM8	1.52e-07	3.96e-06	regulation of T cell activation
Process	GO.0044092	32	1119	9606	9606.ENSP00000161559,9606.ENSP00000216797,9606.ENSP00000222543,9606.ENSP00000226574,9606.ENSP00000240100,9606.ENSP00000245907,9606.ENSP00000256458,9606.ENSP00000256495,9606.ENSP00000259206,9606.ENSP00000260356,9606.ENSP00000263341,9606.ENSP00000263464,9606.ENSP00000265074,9606.ENSP00000265598,9606.ENSP00000275015,9606.ENSP00000287814,9606.ENSP00000295927,9606.ENSP00000299759,9606.ENSP00000313391,…	CEACAM1,NFKBIA,TFPI2,NFKB1,DUSP4,C3,IRAK2,BHLHE40,IL1RN,THBS1,IL1B,BIRC3,NPR3,LAMP3,NFKBIE,TIMP4,PTX3,RRAD,DAB2,PLAUR,IFIT2,ZC3H12A,ID1,MSX1,IL18BP,CYLD,CD44,SERPINE2,TNFAIP8,HMGA2,FRY,TNFAIP3	1.62e-07	4.21e-06	negative regulation of molecular function
Process	GO.2001233	18	388	9606	9606.ENSP00000006053,9606.ENSP00000241261,9606.ENSP00000242208,9606.ENSP00000260356,9606.ENSP00000263339,9606.ENSP00000263341,9606.ENSP00000264832,9606.ENSP00000339328,9606.ENSP00000344479,9606.ENSP00000346697,9606.ENSP00000355996,9606.ENSP00000362994,9606.ENSP00000372170,9606.ENSP00000376943,9606.ENSP00000392025,9606.ENSP00000398632,9606.ENSP00000446252,9606.ENSP00000481570	CX3CL1,TNFSF10,INHBA,THBS1,IL1A,IL1B,ICAM1,PLAUR,NR4A2,BMF,G0S2,TRAF1,MSX1,BCL2L11,CYLD,CD44,SOD2,TNFAIP3	1.65e-07	4.26e-06	regulation of apoptotic signaling pathway
Process	GO.0002253	18	393	9606	9606.ENSP00000216797,9606.ENSP00000220751,9606.ENSP00000221452,9606.ENSP00000226574,9606.ENSP00000245907,9606.ENSP00000256458,9606.ENSP00000260010,9606.ENSP00000263642,9606.ENSP00000296861,9606.ENSP00000299663,9606.ENSP00000317891,9606.ENSP00000325663,9606.ENSP00000357981,9606.ENSP00000362179,9606.ENSP00000369213,9606.ENSP00000392025,9606.ENSP00000438615,9606.ENSP00000481570	NFKBIA,RIPK2,RELB,NFKB1,C3,IRAK2,TLR2,IFIH1,TNFRSF21,CLEC4E,TNIP1,NFKBIZ,CTSS,ZC3H12A,DDX58,CYLD,C1R,TNFAIP3	1.98e-07	5.07e-06	activation of immune response
Process	GO.0045595	41	1695	9606	9606.ENSP00000006053,9606.ENSP00000161559,9606.ENSP00000216797,9606.ENSP00000220751,9606.ENSP00000225474,9606.ENSP00000226574,9606.ENSP00000228534,9606.ENSP00000242208,9606.ENSP00000245414,9606.ENSP00000252809,9606.ENSP00000254958,9606.ENSP00000260010,9606.ENSP00000260356,9606.ENSP00000263341,9606.ENSP00000263923,9606.ENSP00000265361,9606.ENSP00000265362,9606.ENSP00000267569,9606.ENSP00000285379,…	CX3CL1,CEACAM1,NFKBIA,RIPK2,CSF3,NFKB1,IL23A,INHBA,IRF1,GDF15,JAG1,TLR2,THBS1,IL1B,KDR,SEMA3C,SEMA3A,JDP2,CA2,SMAD6,BCL6B,TNFRSF21,SOX17,DAB2,NFKBIZ,ZBTB16,SEMA6C,GBP1,ZC3H12A,ID1,MSX1,ETS1,IL6,JAK3,CYLD,PHLDB2,HDAC9,SERPINE2,SOD2,ADAM8,LDLR	2e-07	5.09e-06	regulation of cell differentiation
Process	GO.0007155	27	843	9606	9606.ENSP00000006053,9606.ENSP00000161559,9606.ENSP00000225831,9606.ENSP00000228280,9606.ENSP00000243347,9606.ENSP00000246006,9606.ENSP00000260356,9606.ENSP00000263341,9606.ENSP00000264144,9606.ENSP00000264832,9606.ENSP00000288840,9606.ENSP00000294728,9606.ENSP00000295522,9606.ENSP00000296585,9606.ENSP00000317891,9606.ENSP00000326888,9606.ENSP00000331736,9606.ENSP00000352606,9606.ENSP00000360296,…	CX3CL1,CEACAM1,CCL2,KITLG,TNFAIP6,CD93,THBS1,IL1B,LAMC2,ICAM1,SMAD6,VCAM1,CLDN1,ITGA2,TNIP1,LIMS2,SELE,HAPLN3,PPAP2B,ID1,B4GALT1,DSP,BCL2L11,CLDN14,CD44,IL32,ADAM8	2e-07	5.09e-06	cell adhesion
Process	GO.0043902	18	394	9606	9606.ENSP00000216797,9606.ENSP00000220751,9606.ENSP00000221452,9606.ENSP00000226574,9606.ENSP00000242208,9606.ENSP00000251642,9606.ENSP00000256458,9606.ENSP00000260010,9606.ENSP00000263642,9606.ENSP00000299663,9606.ENSP00000317891,9606.ENSP00000357981,9606.ENSP00000359488,9606.ENSP00000369213,9606.ENSP00000376943,9606.ENSP00000392025,9606.ENSP00000453302,9606.ENSP00000481570	NFKBIA,RIPK2,RELB,NFKB1,INHBA,DHX58,IRAK2,TLR2,IFIH1,CLEC4E,TNIP1,CTSS,GBP5,DDX58,BCL2L11,CYLD,ADAM8,TNFAIP3	2.05e-07	5.16e-06	positive regulation of multi-organism process
Process	GO.0002443	23	632	9606	9606.ENSP00000161559,9606.ENSP00000226317,9606.ENSP00000226574,9606.ENSP00000243347,9606.ENSP00000245907,9606.ENSP00000246006,9606.ENSP00000254958,9606.ENSP00000260010,9606.ENSP00000264832,9606.ENSP00000295927,9606.ENSP00000296027,9606.ENSP00000334928,9606.ENSP00000339328,9606.ENSP00000357981,9606.ENSP00000361850,9606.ENSP00000369055,9606.ENSP00000369129,9606.ENSP00000379110,9606.ENSP00000385675,…	CEACAM1,CXCL6,NFKB1,TNFAIP6,C3,CD93,JAG1,TLR2,ICAM1,PTX3,CXCL5,PTPRB,PLAUR,CTSS,PLAU,B4GALT1,DSP,CXCL1,IL6,CD44,POU2F2,C1R,ADAM8	2.05e-07	5.16e-06	leukocyte mediated immunity
Process	GO.0032502	89	5401	9606	9606.ENSP00000005257,9606.ENSP00000006053,9606.ENSP00000161559,9606.ENSP00000216797,9606.ENSP00000221452,9606.ENSP00000225474,9606.ENSP00000225831,9606.ENSP00000228280,9606.ENSP00000234111,9606.ENSP00000240100,9606.ENSP00000241261,9606.ENSP00000242208,9606.ENSP00000245414,9606.ENSP00000252809,9606.ENSP00000254958,9606.ENSP00000256759,9606.ENSP00000259874,9606.ENSP00000260010,9606.ENSP00000260356,…	RALA,CX3CL1,CEACAM1,NFKBIA,RELB,CSF3,CCL2,KITLG,ODC1,DUSP4,TNFSF10,INHBA,IRF1,GDF15,JAG1,FST,IER3,TLR2,THBS1,SLC12A2,IL1A,IL1B,KDR,LAMC2,HERC6,ICAM1,NPR3,STC2,SEMA3C,SEMA3A,SEMA3D,CA2,TIMP4,SMAD6,VCAM1,CLDN1,HHIP,ITGA2,TNFRSF21,SOX17,CLEC4E,FGF5,DAB2,ANGPT2,HMGCS1,P2RX7,PTPRB,ZBTB16,NTN4,ETV7,RAPGEF5,NR4A2,WTAP,HAPLN3,LHX9,SEMA6C,NFKB2,NFIA,ZC3H12A,ANGPTL2,ID1,NEBL,SAT1,B4GALT1,DSP,ADAMTS6,ESM1,S…	2.12e-07	5.25e-06	developmental process
Process	GO.0051179	87	5233	9606	9606.ENSP00000004531,9606.ENSP00000005257,9606.ENSP00000006053,9606.ENSP00000161559,9606.ENSP00000216797,9606.ENSP00000220809,9606.ENSP00000225831,9606.ENSP00000226317,9606.ENSP00000226574,9606.ENSP00000242208,9606.ENSP00000243347,9606.ENSP00000243457,9606.ENSP00000245907,9606.ENSP00000246006,9606.ENSP00000259030,9606.ENSP00000259206,9606.ENSP00000260010,9606.ENSP00000260356,9606.ENSP00000261292,…	SLC7A2,RALA,CX3CL1,CEACAM1,NFKBIA,PLAT,CCL2,CXCL6,NFKB1,INHBA,TNFAIP6,KCNJ2,C3,CD93,RTP4,IL1RN,TLR2,THBS1,LIPG,SLC12A2,IL1B,KDR,ICAM1,NPR3,SEMA3C,SEMA3A,NFKBIE,CA2,SLC26A2,KCNT2,VCAM1,CLDN1,PTX3,CXCL3,CXCL5,ITGA2,SOX17,DAB2,ANGPT2,SLC16A6,RHBDF2,P2RX7,SELE,PTPRB,ZBTB16,PLAUR,NR4A2,BMF,CCL20,CACNA1A,BLZF1,CTSS,GBP5,GBP2,GBP1,SGIP1,PPAP2B,SLC16A12,SLC2A6,TSC22D3,PLAU,KCNK15,TNFSF13B,ID1,RPGR,B4GALT…	2.19e-07	5.38e-06	localization
Process	GO.0051249	18	401	9606	9606.ENSP00000161559,9606.ENSP00000220751,9606.ENSP00000225831,9606.ENSP00000228534,9606.ENSP00000242208,9606.ENSP00000245414,9606.ENSP00000263341,9606.ENSP00000294728,9606.ENSP00000296861,9606.ENSP00000325663,9606.ENSP00000338157,9606.ENSP00000362179,9606.ENSP00000365048,9606.ENSP00000385675,9606.ENSP00000391676,9606.ENSP00000392025,9606.ENSP00000453302,9606.ENSP00000481570	CEACAM1,RIPK2,CCL2,IL23A,INHBA,IRF1,IL1B,VCAM1,TNFRSF21,NFKBIZ,ZBTB16,ZC3H12A,TNFSF13B,IL6,JAK3,CYLD,ADAM8,TNFAIP3	2.63e-07	6.38e-06	regulation of lymphocyte activation
Process	GO.0010605	53	2558	9606	9606.ENSP00000161559,9606.ENSP00000220809,9606.ENSP00000221452,9606.ENSP00000222543,9606.ENSP00000226574,9606.ENSP00000240100,9606.ENSP00000242208,9606.ENSP00000245414,9606.ENSP00000245907,9606.ENSP00000256495,9606.ENSP00000256759,9606.ENSP00000260356,9606.ENSP00000263341,9606.ENSP00000263464,9606.ENSP00000263923,9606.ENSP00000265087,9606.ENSP00000265598,9606.ENSP00000267569,9606.ENSP00000287814,…	CEACAM1,PLAT,RELB,TFPI2,NFKB1,DUSP4,INHBA,IRF1,C3,BHLHE40,FST,THBS1,IL1B,BIRC3,KDR,STC2,LAMP3,JDP2,TIMP4,SMAD6,BCL6B,PTX3,SOX17,DAB2,TNIP1,P2RX7,MXD4,ZBTB16,PLAUR,ETV7,NR4A2,LHX9,NFKB2,GBP1,NFIA,PPAP2B,TSC22D3,ZC3H12A,ID1,TRIM22,MSX1,PID1,IL6,JAK3,CD44,HDAC9,SERPINE2,TNFAIP8,HMGA2,FRY,LDLR,CNKSR3,TNFAIP3	2.99e-07	7.18e-06	negative regulation of macromolecule metabolic process
Process	GO.1990869	9	81	9606	9606.ENSP00000006053,9606.ENSP00000225831,9606.ENSP00000226317,9606.ENSP00000296026,9606.ENSP00000296027,9606.ENSP00000351671,9606.ENSP00000362179,9606.ENSP00000379110,9606.ENSP00000427279	CX3CL1,CCL2,CXCL6,CXCL3,CXCL5,CCL20,ZC3H12A,CXCL1,CXCL2	3.1e-07	7.39e-06	cellular response to chemokine
Process	GO.0009968	32	1160	9606	9606.ENSP00000006053,9606.ENSP00000161559,9606.ENSP00000216797,9606.ENSP00000240100,9606.ENSP00000241261,9606.ENSP00000251642,9606.ENSP00000252809,9606.ENSP00000256759,9606.ENSP00000259206,9606.ENSP00000260356,9606.ENSP00000263339,9606.ENSP00000263341,9606.ENSP00000264832,9606.ENSP00000288840,9606.ENSP00000296575,9606.ENSP00000297316,9606.ENSP00000313391,9606.ENSP00000317891,9606.ENSP00000330696,…	CX3CL1,CEACAM1,NFKBIA,DUSP4,TNFSF10,DHX58,GDF15,FST,IL1RN,THBS1,IL1A,IL1B,ICAM1,SMAD6,HHIP,SOX17,DAB2,TNIP1,P2RX7,PLAUR,NR4A2,GBP1,ZC3H12A,PID1,IL18BP,IL6,CYLD,CD44,SERPINE2,SOD2,CNKSR3,TNFAIP3	3.55e-07	8.36e-06	negative regulation of signal transduction
Process	GO.0043065	22	604	9606	9606.ENSP00000220751,9606.ENSP00000225831,9606.ENSP00000241261,9606.ENSP00000242208,9606.ENSP00000260356,9606.ENSP00000265080,9606.ENSP00000330696,9606.ENSP00000338157,9606.ENSP00000339328,9606.ENSP00000346697,9606.ENSP00000355996,9606.ENSP00000360891,9606.ENSP00000362179,9606.ENSP00000369055,9606.ENSP00000372170,9606.ENSP00000376943,9606.ENSP00000385675,9606.ENSP00000392025,9606.ENSP00000427424,…	RIPK2,CCL2,TNFSF10,INHBA,THBS1,RASGRF2,P2RX7,ZBTB16,PLAUR,BMF,G0S2,IFIT2,ZC3H12A,B4GALT1,MSX1,BCL2L11,IL6,CYLD,TNFAIP8,HMGA2,SOD2,ADAM8	3.8e-07	8.89e-06	positive regulation of apoptotic process
Process	GO.0043408	24	712	9606	9606.ENSP00000006053,9606.ENSP00000161559,9606.ENSP00000220751,9606.ENSP00000225831,9606.ENSP00000240100,9606.ENSP00000242208,9606.ENSP00000252809,9606.ENSP00000256458,9606.ENSP00000260356,9606.ENSP00000263341,9606.ENSP00000263923,9606.ENSP00000264832,9606.ENSP00000265362,9606.ENSP00000317891,9606.ENSP00000330696,9606.ENSP00000351671,9606.ENSP00000359504,9606.ENSP00000362179,9606.ENSP00000365280,…	CX3CL1,CEACAM1,RIPK2,CCL2,DUSP4,INHBA,GDF15,IRAK2,THBS1,IL1B,KDR,ICAM1,SEMA3A,TNIP1,P2RX7,CCL20,GBP1,ZC3H12A,ID1,IL6,CD44,PDGFC,ADAM8,CNKSR3	4.2e-07	9.8e-06	regulation of MAPK cascade
Process	GO.0032675	10	112	9606	9606.ENSP00000220751,9606.ENSP00000260010,9606.ENSP00000263339,9606.ENSP00000263341,9606.ENSP00000263642,9606.ENSP00000330696,9606.ENSP00000362179,9606.ENSP00000369213,9606.ENSP00000385675,9606.ENSP00000481570	RIPK2,TLR2,IL1A,IL1B,IFIH1,P2RX7,ZC3H12A,DDX58,IL6,TNFAIP3	4.42e-07	1.02e-05	regulation of interleukin-6 production
Process	GO.0009628	30	1052	9606	9606.ENSP00000216797,9606.ENSP00000220809,9606.ENSP00000221452,9606.ENSP00000226574,9606.ENSP00000243457,9606.ENSP00000245414,9606.ENSP00000256495,9606.ENSP00000259727,9606.ENSP00000260010,9606.ENSP00000260356,9606.ENSP00000262461,9606.ENSP00000263339,9606.ENSP00000263341,9606.ENSP00000264832,9606.ENSP00000265087,9606.ENSP00000285379,9606.ENSP00000294728,9606.ENSP00000295522,9606.ENSP00000296585,…	NFKBIA,PLAT,RELB,NFKB1,KCNJ2,IRF1,BHLHE40,GMPR,TLR2,THBS1,SLC12A2,IL1A,IL1B,ICAM1,STC2,CA2,VCAM1,CLDN1,ITGA2,ANGPT2,HMGCS1,P2RX7,NR4A2,BMF,CTSS,TSC22D3,PLAU,ETS1,SERPINE2,ADAM8	4.41e-07	1.02e-05	response to abiotic stimulus
Process	GO.0051091	14	250	9606	9606.ENSP00000220751,9606.ENSP00000225474,9606.ENSP00000226574,9606.ENSP00000256458,9606.ENSP00000260010,9606.ENSP00000263341,9606.ENSP00000264832,9606.ENSP00000358983,9606.ENSP00000360296,9606.ENSP00000362994,9606.ENSP00000369213,9606.ENSP00000369299,9606.ENSP00000385675,9606.ENSP00000453302	RIPK2,CSF3,NFKB1,IRAK2,TLR2,IL1B,ICAM1,NFKB2,PPAP2B,TRAF1,DDX58,TRIM22,IL6,ADAM8	4.97e-07	1.13e-05	positive regulation of DNA-binding transcription factor activity
Process	GO.0002757	16	332	9606	9606.ENSP00000216797,9606.ENSP00000220751,9606.ENSP00000221452,9606.ENSP00000226574,9606.ENSP00000256458,9606.ENSP00000260010,9606.ENSP00000263642,9606.ENSP00000296861,9606.ENSP00000299663,9606.ENSP00000317891,9606.ENSP00000325663,9606.ENSP00000357981,9606.ENSP00000362179,9606.ENSP00000369213,9606.ENSP00000392025,9606.ENSP00000481570	NFKBIA,RIPK2,RELB,NFKB1,IRAK2,TLR2,IFIH1,TNFRSF21,CLEC4E,TNIP1,NFKBIZ,CTSS,ZC3H12A,DDX58,CYLD,TNFAIP3	5.1e-07	1.16e-05	immune response-activating signal transduction
Process	GO.0002221	10	114	9606	9606.ENSP00000216797,9606.ENSP00000220751,9606.ENSP00000256458,9606.ENSP00000260010,9606.ENSP00000263642,9606.ENSP00000317891,9606.ENSP00000357981,9606.ENSP00000369213,9606.ENSP00000392025,9606.ENSP00000481570	NFKBIA,RIPK2,IRAK2,TLR2,IFIH1,TNIP1,CTSS,DDX58,CYLD,TNFAIP3	5.15e-07	1.16e-05	pattern recognition receptor signaling pathway
Process	GO.0031324	51	2463	9606	9606.ENSP00000161559,9606.ENSP00000220809,9606.ENSP00000221452,9606.ENSP00000222543,9606.ENSP00000226574,9606.ENSP00000240100,9606.ENSP00000242208,9606.ENSP00000245414,9606.ENSP00000245907,9606.ENSP00000256495,9606.ENSP00000256759,9606.ENSP00000260356,9606.ENSP00000263341,9606.ENSP00000263464,9606.ENSP00000265598,9606.ENSP00000267569,9606.ENSP00000287814,9606.ENSP00000288840,9606.ENSP00000293805,…	CEACAM1,PLAT,RELB,TFPI2,NFKB1,DUSP4,INHBA,IRF1,C3,BHLHE40,FST,THBS1,IL1B,BIRC3,LAMP3,JDP2,TIMP4,SMAD6,BCL6B,PTX3,SOX17,DAB2,TNIP1,P2RX7,MXD4,ZBTB16,PLAUR,ETV7,NR4A2,BMF,LHX9,NFKB2,GBP1,NFIA,PPAP2B,TSC22D3,ZC3H12A,ID1,TRIM22,MSX1,PID1,IL6,JAK3,CD44,HDAC9,SERPINE2,TNFAIP8,HMGA2,FRY,CNKSR3,TNFAIP3	5.54e-07	1.24e-05	negative regulation of cellular metabolic process
Process	GO.0044419	24	724	9606	9606.ENSP00000005257,9606.ENSP00000216797,9606.ENSP00000225831,9606.ENSP00000246006,9606.ENSP00000251642,9606.ENSP00000263642,9606.ENSP00000263923,9606.ENSP00000264832,9606.ENSP00000294728,9606.ENSP00000295522,9606.ENSP00000295927,9606.ENSP00000296026,9606.ENSP00000296585,9606.ENSP00000317891,9606.ENSP00000351671,9606.ENSP00000360231,9606.ENSP00000362179,9606.ENSP00000369213,9606.ENSP00000369299,…	RALA,NFKBIA,CCL2,CD93,DHX58,IFIH1,KDR,ICAM1,VCAM1,CLDN1,PTX3,CXCL3,ITGA2,TNIP1,CCL20,NFIA,ZC3H12A,DDX58,TRIM22,BCL2L11,CXCL1,CXCL2,HMGA2,LDLR	5.62e-07	1.25e-05	interspecies interaction between organisms
Process	GO.0050900	15	296	9606	9606.ENSP00000006053,9606.ENSP00000161559,9606.ENSP00000225831,9606.ENSP00000226317,9606.ENSP00000263341,9606.ENSP00000264832,9606.ENSP00000294728,9606.ENSP00000296026,9606.ENSP00000314897,9606.ENSP00000331736,9606.ENSP00000351671,9606.ENSP00000369055,9606.ENSP00000385675,9606.ENSP00000398632,9606.ENSP00000453302	CX3CL1,CEACAM1,CCL2,CXCL6,IL1B,ICAM1,VCAM1,CXCL3,ANGPT2,SELE,CCL20,B4GALT1,IL6,CD44,ADAM8	6.43e-07	1.41e-05	leukocyte migration
Process	GO.0009987	177	14652	9606	9606.ENSP00000004531,9606.ENSP00000005257,9606.ENSP00000006053,9606.ENSP00000161559,9606.ENSP00000216797,9606.ENSP00000220751,9606.ENSP00000220809,9606.ENSP00000221452,9606.ENSP00000222543,9606.ENSP00000222553,9606.ENSP00000225474,9606.ENSP00000225831,9606.ENSP00000226317,9606.ENSP00000226574,9606.ENSP00000228280,9606.ENSP00000228534,9606.ENSP00000234111,9606.ENSP00000240100,9606.ENSP00000241261,…	SLC7A2,RALA,CX3CL1,CEACAM1,NFKBIA,RIPK2,PLAT,RELB,TFPI2,NAMPT,CSF3,CCL2,CXCL6,NFKB1,KITLG,IL23A,ODC1,DUSP4,TNFSF10,INHBA,TNFAIP6,KCNJ2,MT2A,IRF1,C3,CD93,GDF15,JAG1,IRAK2,BHLHE40,FST,OASL,DRAM1,RTP4,IL1RN,GMPR,IER3,TLR2,THBS1,HECW2,LIPG,SLC12A2,PLEKHA4,IL1A,IL1B,BIRC3,IFIH1,KDR,LAMC2,HERC6,ICAM1,NPR3,RASGRF2,STC2,SEMA3C,SEMA3A,SQLE,PHLDA1,JDP2,PLA1A,ZC3H12C,SEMA3D,ABI3BP,CA2,SLC26A2,TIMP4,SMAD6,KC…	6.41e-07	1.41e-05	cellular process
Process	GO.0010648	33	1255	9606	9606.ENSP00000006053,9606.ENSP00000161559,9606.ENSP00000216797,9606.ENSP00000240100,9606.ENSP00000241261,9606.ENSP00000242208,9606.ENSP00000251642,9606.ENSP00000252809,9606.ENSP00000256759,9606.ENSP00000259206,9606.ENSP00000260356,9606.ENSP00000263339,9606.ENSP00000263341,9606.ENSP00000264832,9606.ENSP00000288840,9606.ENSP00000296575,9606.ENSP00000297316,9606.ENSP00000313391,9606.ENSP00000317891,…	CX3CL1,CEACAM1,NFKBIA,DUSP4,TNFSF10,INHBA,DHX58,GDF15,FST,IL1RN,THBS1,IL1A,IL1B,ICAM1,SMAD6,HHIP,SOX17,DAB2,TNIP1,P2RX7,PLAUR,NR4A2,GBP1,ZC3H12A,PID1,IL18BP,IL6,CYLD,CD44,SERPINE2,SOD2,CNKSR3,TNFAIP3	6.5e-07	1.42e-05	negative regulation of cell communication
Process	GO.0051248	30	1075	9606	9606.ENSP00000161559,9606.ENSP00000220809,9606.ENSP00000222543,9606.ENSP00000226574,9606.ENSP00000240100,9606.ENSP00000242208,9606.ENSP00000245907,9606.ENSP00000260356,9606.ENSP00000263341,9606.ENSP00000263464,9606.ENSP00000265598,9606.ENSP00000287814,9606.ENSP00000288840,9606.ENSP00000295927,9606.ENSP00000317891,9606.ENSP00000330696,9606.ENSP00000339328,9606.ENSP00000359504,9606.ENSP00000360296,…	CEACAM1,PLAT,TFPI2,NFKB1,DUSP4,INHBA,C3,THBS1,IL1B,BIRC3,LAMP3,TIMP4,SMAD6,PTX3,TNIP1,P2RX7,PLAUR,GBP1,PPAP2B,ZC3H12A,PID1,IL6,JAK3,CD44,SERPINE2,TNFAIP8,FRY,LDLR,CNKSR3,TNFAIP3	6.86e-07	1.48e-05	negative regulation of protein metabolic process
Process	GO.0023057	33	1258	9606	9606.ENSP00000006053,9606.ENSP00000161559,9606.ENSP00000216797,9606.ENSP00000240100,9606.ENSP00000241261,9606.ENSP00000242208,9606.ENSP00000251642,9606.ENSP00000252809,9606.ENSP00000256759,9606.ENSP00000259206,9606.ENSP00000260356,9606.ENSP00000263339,9606.ENSP00000263341,9606.ENSP00000264832,9606.ENSP00000288840,9606.ENSP00000296575,9606.ENSP00000297316,9606.ENSP00000313391,9606.ENSP00000317891,…	CX3CL1,CEACAM1,NFKBIA,DUSP4,TNFSF10,INHBA,DHX58,GDF15,FST,IL1RN,THBS1,IL1A,IL1B,ICAM1,SMAD6,HHIP,SOX17,DAB2,TNIP1,P2RX7,PLAUR,NR4A2,GBP1,ZC3H12A,PID1,IL18BP,IL6,CYLD,CD44,SERPINE2,SOD2,CNKSR3,TNFAIP3	6.84e-07	1.48e-05	negative regulation of signaling
Process	GO.0019222	100	6516	9606	9606.ENSP00000006053,9606.ENSP00000161559,9606.ENSP00000216797,9606.ENSP00000220751,9606.ENSP00000220809,9606.ENSP00000221452,9606.ENSP00000222543,9606.ENSP00000222553,9606.ENSP00000225474,9606.ENSP00000225831,9606.ENSP00000226574,9606.ENSP00000228534,9606.ENSP00000234111,9606.ENSP00000240100,9606.ENSP00000241261,9606.ENSP00000242208,9606.ENSP00000245414,9606.ENSP00000245907,9606.ENSP00000252809,…	CX3CL1,CEACAM1,NFKBIA,RIPK2,PLAT,RELB,TFPI2,NAMPT,CSF3,CCL2,NFKB1,IL23A,ODC1,DUSP4,TNFSF10,INHBA,IRF1,C3,GDF15,JAG1,IRAK2,BHLHE40,FST,DRAM1,TLR2,THBS1,LIPG,IL1A,IL1B,BIRC3,KDR,ICAM1,NPR3,STC2,SEMA3A,LAMP3,SQLE,JDP2,NFKBIE,TIMP4,SMAD6,BCL6B,PTX3,ITGA2,TNFRSF21,SOX17,FGF5,DAB2,TNIP1,HMGCS1,NFKBIZ,P2RX7,SELE,MXD4,ZBTB16,PLAUR,ETV7,NR4A2,BMF,WTAP,CCL20,E2F2,G0S2,LHX9,BLZF1,NFKB2,GBP1,NFIA,PPAP2B,TSC2…	6.82e-07	1.48e-05	regulation of metabolic process
Process	GO.0032481	8	65	9606	9606.ENSP00000220751,9606.ENSP00000226574,9606.ENSP00000245414,9606.ENSP00000251642,9606.ENSP00000260010,9606.ENSP00000263642,9606.ENSP00000358983,9606.ENSP00000369213	RIPK2,NFKB1,IRF1,DHX58,TLR2,IFIH1,NFKB2,DDX58	7.04e-07	1.51e-05	positive regulation of type I interferon production
Process	GO.0035295	25	793	9606	9606.ENSP00000005257,9606.ENSP00000006053,9606.ENSP00000161559,9606.ENSP00000225831,9606.ENSP00000254958,9606.ENSP00000260356,9606.ENSP00000263923,9606.ENSP00000265361,9606.ENSP00000288840,9606.ENSP00000296575,9606.ENSP00000297316,9606.ENSP00000314897,9606.ENSP00000334928,9606.ENSP00000360231,9606.ENSP00000362179,9606.ENSP00000365280,9606.ENSP00000368572,9606.ENSP00000369055,9606.ENSP00000370812,…	RALA,CX3CL1,CEACAM1,CCL2,JAG1,THBS1,KDR,SEMA3C,SMAD6,HHIP,SOX17,ANGPT2,PTPRB,NFIA,ZC3H12A,ID1,SAT1,B4GALT1,ESM1,ETS1,BCL2L11,TYMP,SERPINE2,PDGFC,ADAM8	7.83e-07	1.66e-05	tube development
Process	GO.0051049	40	1732	9606	9606.ENSP00000005257,9606.ENSP00000161559,9606.ENSP00000216797,9606.ENSP00000220751,9606.ENSP00000225831,9606.ENSP00000226574,9606.ENSP00000242208,9606.ENSP00000243457,9606.ENSP00000245907,9606.ENSP00000260010,9606.ENSP00000260356,9606.ENSP00000261292,9606.ENSP00000263339,9606.ENSP00000263341,9606.ENSP00000263642,9606.ENSP00000264832,9606.ENSP00000265087,9606.ENSP00000285379,9606.ENSP00000295927,…	RALA,CEACAM1,NFKBIA,RIPK2,CCL2,NFKB1,INHBA,KCNJ2,C3,TLR2,THBS1,LIPG,IL1A,IL1B,IFIH1,ICAM1,STC2,CA2,PTX3,ITGA2,TNFRSF21,CLEC4E,RRAD,DAB2,RHBDF2,P2RX7,SELE,CACNA1A,CTSS,GBP1,SGIP1,KCNK15,ZC3H12A,DDX58,PID1,IL6,SERPINE2,ADAM8,LDLR,CNKSR3	9.33e-07	1.97e-05	regulation of transport
Process	GO.0071622	7	47	9606	9606.ENSP00000226317,9606.ENSP00000228534,9606.ENSP00000260356,9606.ENSP00000296026,9606.ENSP00000296027,9606.ENSP00000379110,9606.ENSP00000427279	CXCL6,IL23A,THBS1,CXCL3,CXCL5,CXCL1,CXCL2	1.12e-06	2.36e-05	regulation of granulocyte chemotaxis
Process	GO.2001236	11	158	9606	9606.ENSP00000006053,9606.ENSP00000241261,9606.ENSP00000242208,9606.ENSP00000260356,9606.ENSP00000263339,9606.ENSP00000263341,9606.ENSP00000264832,9606.ENSP00000355996,9606.ENSP00000362994,9606.ENSP00000392025,9606.ENSP00000481570	CX3CL1,TNFSF10,INHBA,THBS1,IL1A,IL1B,ICAM1,G0S2,TRAF1,CYLD,TNFAIP3	1.18e-06	2.45e-05	regulation of extrinsic apoptotic signaling pathway
Process	GO.0050870	12	193	9606	9606.ENSP00000220751,9606.ENSP00000225831,9606.ENSP00000228534,9606.ENSP00000263341,9606.ENSP00000294728,9606.ENSP00000325663,9606.ENSP00000338157,9606.ENSP00000365048,9606.ENSP00000385675,9606.ENSP00000391676,9606.ENSP00000392025,9606.ENSP00000453302	RIPK2,CCL2,IL23A,IL1B,VCAM1,NFKBIZ,ZBTB16,TNFSF13B,IL6,JAK3,CYLD,ADAM8	1.18e-06	2.45e-05	positive regulation of T cell activation
Process	GO.0009719	34	1353	9606	9606.ENSP00000161559,9606.ENSP00000220751,9606.ENSP00000225831,9606.ENSP00000226574,9606.ENSP00000241261,9606.ENSP00000242208,9606.ENSP00000252809,9606.ENSP00000259206,9606.ENSP00000260010,9606.ENSP00000260356,9606.ENSP00000264832,9606.ENSP00000265087,9606.ENSP00000285379,9606.ENSP00000287814,9606.ENSP00000288840,9606.ENSP00000295522,9606.ENSP00000296585,9606.ENSP00000311697,9606.ENSP00000322706,…	CEACAM1,RIPK2,CCL2,NFKB1,TNFSF10,INHBA,GDF15,IL1RN,TLR2,THBS1,ICAM1,STC2,CA2,TIMP4,SMAD6,CLDN1,ITGA2,FGF5,HMGCS1,P2RX7,NR4A2,CACNA1A,CTSS,ID1,MSX1,PID1,ETS1,BCL2L11,IL6,JAK3,CD44,HDAC9,PDGFC,LDLR	1.17e-06	2.45e-05	response to endogenous stimulus
Process	GO.0007249	8	70	9606	9606.ENSP00000216797,9606.ENSP00000220751,9606.ENSP00000221452,9606.ENSP00000226574,9606.ENSP00000256458,9606.ENSP00000260010,9606.ENSP00000263464,9606.ENSP00000358983	NFKBIA,RIPK2,RELB,NFKB1,IRAK2,TLR2,BIRC3,NFKB2	1.18e-06	2.45e-05	I-kappaB kinase/NF-kappaB signaling
Process	GO.0002446	19	498	9606	9606.ENSP00000161559,9606.ENSP00000226317,9606.ENSP00000226574,9606.ENSP00000243347,9606.ENSP00000245907,9606.ENSP00000246006,9606.ENSP00000260010,9606.ENSP00000295927,9606.ENSP00000296027,9606.ENSP00000334928,9606.ENSP00000339328,9606.ENSP00000357981,9606.ENSP00000361850,9606.ENSP00000369055,9606.ENSP00000369129,9606.ENSP00000379110,9606.ENSP00000385675,9606.ENSP00000398632,9606.ENSP00000453302	CEACAM1,CXCL6,NFKB1,TNFAIP6,C3,CD93,TLR2,PTX3,CXCL5,PTPRB,PLAUR,CTSS,PLAU,B4GALT1,DSP,CXCL1,IL6,CD44,ADAM8	1.28e-06	2.62e-05	neutrophil mediated immunity
Process	GO.0014070	26	873	9606	9606.ENSP00000216797,9606.ENSP00000220751,9606.ENSP00000222553,9606.ENSP00000225831,9606.ENSP00000226574,9606.ENSP00000242208,9606.ENSP00000259206,9606.ENSP00000260010,9606.ENSP00000260356,9606.ENSP00000263341,9606.ENSP00000263642,9606.ENSP00000264832,9606.ENSP00000265087,9606.ENSP00000285379,9606.ENSP00000295522,9606.ENSP00000296585,9606.ENSP00000314897,9606.ENSP00000322706,9606.ENSP00000330696,…	NFKBIA,RIPK2,NAMPT,CCL2,NFKB1,INHBA,IL1RN,TLR2,THBS1,IL1B,IFIH1,ICAM1,STC2,CA2,CLDN1,ITGA2,ANGPT2,HMGCS1,P2RX7,NR4A2,ZC3H12A,ID1,DDX58,ETS1,BCL2L11,IL6	1.3e-06	2.64e-05	response to organic cyclic compound
Process	GO.0002520	21	601	9606	9606.ENSP00000221452,9606.ENSP00000225474,9606.ENSP00000228280,9606.ENSP00000242208,9606.ENSP00000245414,9606.ENSP00000254958,9606.ENSP00000256759,9606.ENSP00000260010,9606.ENSP00000263923,9606.ENSP00000264346,9606.ENSP00000294728,9606.ENSP00000299663,9606.ENSP00000338157,9606.ENSP00000358983,9606.ENSP00000376943,9606.ENSP00000385675,9606.ENSP00000391676,9606.ENSP00000392025,9606.ENSP00000408617,…	RELB,CSF3,KITLG,INHBA,IRF1,JAG1,FST,TLR2,KDR,HERC6,VCAM1,CLEC4E,ZBTB16,NFKB2,BCL2L11,IL6,JAK3,CYLD,HDAC9,POU2F2,TNFAIP3	1.35e-06	2.73e-05	immune system development
Process	GO.0009892	54	2762	9606	9606.ENSP00000161559,9606.ENSP00000220809,9606.ENSP00000221452,9606.ENSP00000222543,9606.ENSP00000226574,9606.ENSP00000240100,9606.ENSP00000242208,9606.ENSP00000245414,9606.ENSP00000245907,9606.ENSP00000256495,9606.ENSP00000256759,9606.ENSP00000260356,9606.ENSP00000263341,9606.ENSP00000263464,9606.ENSP00000263923,9606.ENSP00000265087,9606.ENSP00000265598,9606.ENSP00000267569,9606.ENSP00000287814,…	CEACAM1,PLAT,RELB,TFPI2,NFKB1,DUSP4,INHBA,IRF1,C3,BHLHE40,FST,THBS1,IL1B,BIRC3,KDR,STC2,LAMP3,JDP2,TIMP4,SMAD6,BCL6B,PTX3,SOX17,DAB2,TNIP1,P2RX7,MXD4,ZBTB16,PLAUR,ETV7,NR4A2,BMF,LHX9,NFKB2,GBP1,NFIA,PPAP2B,TSC22D3,ZC3H12A,ID1,TRIM22,MSX1,PID1,IL6,JAK3,CD44,HDAC9,SERPINE2,TNFAIP8,HMGA2,FRY,LDLR,CNKSR3,TNFAIP3	1.36e-06	2.74e-05	negative regulation of metabolic process
Process	GO.0070372	14	274	9606	9606.ENSP00000006053,9606.ENSP00000161559,9606.ENSP00000220751,9606.ENSP00000225831,9606.ENSP00000240100,9606.ENSP00000263341,9606.ENSP00000263923,9606.ENSP00000264832,9606.ENSP00000317891,9606.ENSP00000351671,9606.ENSP00000359504,9606.ENSP00000398632,9606.ENSP00000422464,9606.ENSP00000475915	CX3CL1,CEACAM1,RIPK2,CCL2,DUSP4,IL1B,KDR,ICAM1,TNIP1,CCL20,GBP1,CD44,PDGFC,CNKSR3	1.4e-06	2.81e-05	regulation of ERK1 and ERK2 cascade
Process	GO.0080090	93	5982	9606	9606.ENSP00000006053,9606.ENSP00000161559,9606.ENSP00000216797,9606.ENSP00000220751,9606.ENSP00000220809,9606.ENSP00000221452,9606.ENSP00000222543,9606.ENSP00000222553,9606.ENSP00000225474,9606.ENSP00000225831,9606.ENSP00000226574,9606.ENSP00000228534,9606.ENSP00000234111,9606.ENSP00000240100,9606.ENSP00000241261,9606.ENSP00000242208,9606.ENSP00000245414,9606.ENSP00000245907,9606.ENSP00000252809,…	CX3CL1,CEACAM1,NFKBIA,RIPK2,PLAT,RELB,TFPI2,NAMPT,CSF3,CCL2,NFKB1,IL23A,ODC1,DUSP4,TNFSF10,INHBA,IRF1,C3,GDF15,JAG1,IRAK2,BHLHE40,FST,TLR2,THBS1,LIPG,IL1A,IL1B,BIRC3,KDR,ICAM1,SEMA3A,LAMP3,SQLE,JDP2,NFKBIE,TIMP4,SMAD6,BCL6B,PTX3,ITGA2,TNFRSF21,SOX17,DAB2,TNIP1,HMGCS1,NFKBIZ,P2RX7,MXD4,ZBTB16,PLAUR,ETV7,NR4A2,WTAP,CCL20,E2F2,G0S2,LHX9,BLZF1,NFKB2,GBP1,NFIA,PPAP2B,TSC22D3,ZC3H12A,TRAF1,ID1,DDX58,TR…	1.44e-06	2.87e-05	regulation of primary metabolic process
Process	GO.0008284	26	878	9606	9606.ENSP00000220751,9606.ENSP00000222553,9606.ENSP00000225474,9606.ENSP00000228280,9606.ENSP00000228534,9606.ENSP00000234111,9606.ENSP00000260356,9606.ENSP00000263341,9606.ENSP00000263923,9606.ENSP00000264144,9606.ENSP00000294728,9606.ENSP00000296027,9606.ENSP00000296585,9606.ENSP00000311697,9606.ENSP00000365048,9606.ENSP00000365280,9606.ENSP00000369055,9606.ENSP00000370812,9606.ENSP00000375795,…	RIPK2,NAMPT,CSF3,KITLG,IL23A,ODC1,THBS1,IL1B,KDR,LAMC2,VCAM1,CXCL5,ITGA2,FGF5,TNFSF13B,ID1,B4GALT1,ESM1,IL24,PID1,ETS1,IL6,JAK3,PDGFC,HMGA2,TNFAIP3	1.44e-06	2.87e-05	positive regulation of cell population proliferation
Process	GO.0090023	6	30	9606	9606.ENSP00000226317,9606.ENSP00000228534,9606.ENSP00000296026,9606.ENSP00000296027,9606.ENSP00000379110,9606.ENSP00000427279	CXCL6,IL23A,CXCL3,CXCL5,CXCL1,CXCL2	1.46e-06	2.89e-05	positive regulation of neutrophil chemotaxis
Process	GO.0060759	11	162	9606	9606.ENSP00000220751,9606.ENSP00000256458,9606.ENSP00000259206,9606.ENSP00000260010,9606.ENSP00000263464,9606.ENSP00000263642,9606.ENSP00000362994,9606.ENSP00000369213,9606.ENSP00000385675,9606.ENSP00000392025,9606.ENSP00000481570	RIPK2,IRAK2,IL1RN,TLR2,BIRC3,IFIH1,TRAF1,DDX58,IL6,CYLD,TNFAIP3	1.49e-06	2.92e-05	regulation of response to cytokine stimulus
Process	GO.0045766	11	162	9606	9606.ENSP00000006053,9606.ENSP00000245907,9606.ENSP00000260356,9606.ENSP00000263339,9606.ENSP00000263341,9606.ENSP00000263923,9606.ENSP00000314897,9606.ENSP00000362179,9606.ENSP00000376436,9606.ENSP00000408617,9606.ENSP00000437621	CX3CL1,C3,THBS1,IL1A,IL1B,KDR,ANGPT2,ZC3H12A,ETS1,HDAC9,HMGA2	1.49e-06	2.92e-05	positive regulation of angiogenesis
Process	GO.0001932	34	1370	9606	9606.ENSP00000006053,9606.ENSP00000161559,9606.ENSP00000220751,9606.ENSP00000225474,9606.ENSP00000225831,9606.ENSP00000228534,9606.ENSP00000240100,9606.ENSP00000242208,9606.ENSP00000245907,9606.ENSP00000252809,9606.ENSP00000256458,9606.ENSP00000260356,9606.ENSP00000263341,9606.ENSP00000263923,9606.ENSP00000264832,9606.ENSP00000265362,9606.ENSP00000288840,9606.ENSP00000313391,9606.ENSP00000317891,…	CX3CL1,CEACAM1,RIPK2,CSF3,CCL2,IL23A,DUSP4,INHBA,C3,GDF15,IRAK2,THBS1,IL1B,KDR,ICAM1,SEMA3A,SMAD6,DAB2,TNIP1,P2RX7,PLAUR,CCL20,GBP1,PPAP2B,ZC3H12A,ID1,IL24,PID1,IL6,CD44,PDGFC,ADAM8,CNKSR3,TNFAIP3	1.53e-06	2.99e-05	regulation of protein phosphorylation
Process	GO.0034103	8	73	9606	9606.ENSP00000161559,9606.ENSP00000228534,9606.ENSP00000285379,9606.ENSP00000330696,9606.ENSP00000369055,9606.ENSP00000385675,9606.ENSP00000453302,9606.ENSP00000481570	CEACAM1,IL23A,CA2,P2RX7,B4GALT1,IL6,ADAM8,TNFAIP3	1.57e-06	3.05e-05	regulation of tissue remodeling
Process	GO.0002526	8	73	9606	9606.ENSP00000259206,9606.ENSP00000263339,9606.ENSP00000263341,9606.ENSP00000264832,9606.ENSP00000294728,9606.ENSP00000369055,9606.ENSP00000385675,9606.ENSP00000436126	IL1RN,IL1A,IL1B,ICAM1,VCAM1,B4GALT1,IL6,SAA2	1.57e-06	3.05e-05	acute inflammatory response
Process	GO.1903706	17	412	9606	9606.ENSP00000161559,9606.ENSP00000216797,9606.ENSP00000220751,9606.ENSP00000225474,9606.ENSP00000228534,9606.ENSP00000242208,9606.ENSP00000245414,9606.ENSP00000254958,9606.ENSP00000260356,9606.ENSP00000285379,9606.ENSP00000325663,9606.ENSP00000338157,9606.ENSP00000362179,9606.ENSP00000376436,9606.ENSP00000391676,9606.ENSP00000392025,9606.ENSP00000453302	CEACAM1,NFKBIA,RIPK2,CSF3,IL23A,INHBA,IRF1,JAG1,THBS1,CA2,NFKBIZ,ZBTB16,ZC3H12A,ETS1,JAK3,CYLD,ADAM8	1.74e-06	3.29e-05	regulation of hemopoiesis
Process	GO.0051770	5	16	9606	9606.ENSP00000222553,9606.ENSP00000225831,9606.ENSP00000260010,9606.ENSP00000263923,9606.ENSP00000351671	NAMPT,CCL2,TLR2,KDR,CCL20	1.76e-06	3.29e-05	positive regulation of nitric-oxide synthase biosynthetic process
Process	GO.0032755	8	74	9606	9606.ENSP00000220751,9606.ENSP00000260010,9606.ENSP00000263339,9606.ENSP00000263341,9606.ENSP00000263642,9606.ENSP00000330696,9606.ENSP00000369213,9606.ENSP00000385675	RIPK2,TLR2,IL1A,IL1B,IFIH1,P2RX7,DDX58,IL6	1.73e-06	3.29e-05	positive regulation of interleukin-6 production
Process	GO.0032268	50	2486	9606	9606.ENSP00000006053,9606.ENSP00000161559,9606.ENSP00000216797,9606.ENSP00000220751,9606.ENSP00000220809,9606.ENSP00000222543,9606.ENSP00000225474,9606.ENSP00000225831,9606.ENSP00000226574,9606.ENSP00000228534,9606.ENSP00000240100,9606.ENSP00000241261,9606.ENSP00000242208,9606.ENSP00000245907,9606.ENSP00000252809,9606.ENSP00000256458,9606.ENSP00000260356,9606.ENSP00000263341,9606.ENSP00000263464,…	CX3CL1,CEACAM1,NFKBIA,RIPK2,PLAT,TFPI2,CSF3,CCL2,NFKB1,IL23A,DUSP4,TNFSF10,INHBA,C3,GDF15,IRAK2,THBS1,IL1B,BIRC3,KDR,ICAM1,SEMA3A,LAMP3,JDP2,TIMP4,SMAD6,ITGA2,DAB2,TNIP1,P2RX7,PLAUR,CCL20,GBP1,PPAP2B,ZC3H12A,ID1,IL24,PID1,BCL2L11,IL6,CD44,KBTBD8,SERPINE2,PDGFC,TNFAIP8,FRY,ADAM8,LDLR,CNKSR3,TNFAIP3	1.73e-06	3.29e-05	regulation of cellular protein metabolic process
Process	GO.0031663	6	31	9606	9606.ENSP00000216797,9606.ENSP00000220751,9606.ENSP00000225831,9606.ENSP00000256458,9606.ENSP00000260010,9606.ENSP00000263341	NFKBIA,RIPK2,CCL2,IRAK2,TLR2,IL1B	1.73e-06	3.29e-05	lipopolysaccharide-mediated signaling pathway
Process	GO.0002250	14	280	9606	9606.ENSP00000220751,9606.ENSP00000221452,9606.ENSP00000245907,9606.ENSP00000254958,9606.ENSP00000264832,9606.ENSP00000265598,9606.ENSP00000296861,9606.ENSP00000357981,9606.ENSP00000358983,9606.ENSP00000384212,9606.ENSP00000385675,9606.ENSP00000391676,9606.ENSP00000431603,9606.ENSP00000438615	RIPK2,RELB,C3,JAG1,ICAM1,LAMP3,TNFRSF21,CTSS,NFKB2,IL18BP,IL6,JAK3,POU2F2,C1R	1.79e-06	3.32e-05	adaptive immune response
Process	GO.0070498	7	51	9606	9606.ENSP00000216797,9606.ENSP00000220751,9606.ENSP00000226574,9606.ENSP00000256458,9606.ENSP00000259206,9606.ENSP00000263339,9606.ENSP00000263341	NFKBIA,RIPK2,NFKB1,IRAK2,IL1RN,IL1A,IL1B	1.84e-06	3.4e-05	interleukin-1-mediated signaling pathway
Process	GO.0070098	8	75	9606	9606.ENSP00000006053,9606.ENSP00000225831,9606.ENSP00000226317,9606.ENSP00000296026,9606.ENSP00000296027,9606.ENSP00000351671,9606.ENSP00000379110,9606.ENSP00000427279	CX3CL1,CCL2,CXCL6,CXCL3,CXCL5,CCL20,CXCL1,CXCL2	1.9e-06	3.5e-05	chemokine-mediated signaling pathway
Process	GO.0051050	26	892	9606	9606.ENSP00000216797,9606.ENSP00000220751,9606.ENSP00000225831,9606.ENSP00000242208,9606.ENSP00000243457,9606.ENSP00000245907,9606.ENSP00000260010,9606.ENSP00000261292,9606.ENSP00000263339,9606.ENSP00000263341,9606.ENSP00000263642,9606.ENSP00000285379,9606.ENSP00000295927,9606.ENSP00000296585,9606.ENSP00000299663,9606.ENSP00000313391,9606.ENSP00000330696,9606.ENSP00000331736,9606.ENSP00000357981,…	NFKBIA,RIPK2,CCL2,INHBA,KCNJ2,C3,TLR2,LIPG,IL1A,IL1B,IFIH1,CA2,PTX3,ITGA2,CLEC4E,DAB2,P2RX7,SELE,CTSS,SGIP1,ZC3H12A,DDX58,IL6,ADAM8,LDLR,CNKSR3	1.91e-06	3.5e-05	positive regulation of transport
Process	GO.0007162	13	245	9606	9606.ENSP00000161559,9606.ENSP00000245414,9606.ENSP00000254958,9606.ENSP00000259206,9606.ENSP00000260356,9606.ENSP00000296861,9606.ENSP00000314897,9606.ENSP00000359504,9606.ENSP00000362179,9606.ENSP00000391676,9606.ENSP00000392025,9606.ENSP00000405405,9606.ENSP00000415786	CEACAM1,IRF1,JAG1,IL1RN,THBS1,TNFRSF21,ANGPT2,GBP1,ZC3H12A,JAK3,CYLD,PHLDB2,SERPINE2	2.27e-06	4.12e-05	negative regulation of cell adhesion
Process	GO.0032655	7	53	9606	9606.ENSP00000220751,9606.ENSP00000226574,9606.ENSP00000228534,9606.ENSP00000245414,9606.ENSP00000260010,9606.ENSP00000260356,9606.ENSP00000391676	RIPK2,NFKB1,IL23A,IRF1,TLR2,THBS1,JAK3	2.32e-06	4.18e-05	regulation of interleukin-12 production
Process	GO.0048534	20	573	9606	9606.ENSP00000221452,9606.ENSP00000225474,9606.ENSP00000228280,9606.ENSP00000242208,9606.ENSP00000245414,9606.ENSP00000254958,9606.ENSP00000256759,9606.ENSP00000260010,9606.ENSP00000263923,9606.ENSP00000264346,9606.ENSP00000294728,9606.ENSP00000299663,9606.ENSP00000338157,9606.ENSP00000358983,9606.ENSP00000376943,9606.ENSP00000385675,9606.ENSP00000391676,9606.ENSP00000392025,9606.ENSP00000408617,…	RELB,CSF3,KITLG,INHBA,IRF1,JAG1,FST,TLR2,KDR,HERC6,VCAM1,CLEC4E,ZBTB16,NFKB2,BCL2L11,IL6,JAK3,CYLD,HDAC9,POU2F2	2.49e-06	4.46e-05	hematopoietic or lymphoid organ development
Process	GO.0009893	60	3280	9606	9606.ENSP00000006053,9606.ENSP00000216797,9606.ENSP00000220751,9606.ENSP00000221452,9606.ENSP00000222553,9606.ENSP00000225474,9606.ENSP00000225831,9606.ENSP00000226574,9606.ENSP00000228534,9606.ENSP00000241261,9606.ENSP00000242208,9606.ENSP00000245414,9606.ENSP00000245907,9606.ENSP00000252809,9606.ENSP00000254958,9606.ENSP00000256458,9606.ENSP00000260010,9606.ENSP00000260356,9606.ENSP00000263339,…	CX3CL1,NFKBIA,RIPK2,RELB,NAMPT,CSF3,CCL2,NFKB1,IL23A,TNFSF10,INHBA,IRF1,C3,GDF15,JAG1,IRAK2,TLR2,THBS1,IL1A,IL1B,BIRC3,KDR,ICAM1,NPR3,SEMA3A,LAMP3,JDP2,SMAD6,PTX3,ITGA2,SOX17,DAB2,TNIP1,P2RX7,SELE,ZBTB16,PLAUR,NR4A2,CCL20,E2F2,NFKB2,NFIA,ZC3H12A,ID1,DDX58,TRIM22,MSX1,IL24,PID1,ETS1,BCL2L11,IL6,CD44,GCH1,PDGFC,POU2F2,HMGA2,ADAM8,LDLR,TNFAIP3	2.5e-06	4.47e-05	positive regulation of metabolic process
Process	GO.0050921	10	138	9606	9606.ENSP00000226317,9606.ENSP00000228534,9606.ENSP00000260356,9606.ENSP00000263923,9606.ENSP00000296026,9606.ENSP00000296027,9606.ENSP00000296585,9606.ENSP00000379110,9606.ENSP00000385675,9606.ENSP00000427279	CXCL6,IL23A,THBS1,KDR,CXCL3,CXCL5,ITGA2,CXCL1,IL6,CXCL2	2.61e-06	4.64e-05	positive regulation of chemotaxis
Process	GO.0045597	26	908	9606	9606.ENSP00000006053,9606.ENSP00000161559,9606.ENSP00000220751,9606.ENSP00000225474,9606.ENSP00000226574,9606.ENSP00000228534,9606.ENSP00000242208,9606.ENSP00000252809,9606.ENSP00000254958,9606.ENSP00000260010,9606.ENSP00000263341,9606.ENSP00000263923,9606.ENSP00000265361,9606.ENSP00000265362,9606.ENSP00000285379,9606.ENSP00000297316,9606.ENSP00000313391,9606.ENSP00000325663,9606.ENSP00000338157,…	CX3CL1,CEACAM1,RIPK2,CSF3,NFKB1,IL23A,INHBA,GDF15,JAG1,TLR2,IL1B,KDR,SEMA3C,SEMA3A,CA2,SOX17,DAB2,NFKBIZ,ZBTB16,ZC3H12A,ETS1,IL6,CYLD,SERPINE2,SOD2,ADAM8	2.62e-06	4.64e-05	positive regulation of cell differentiation
Process	GO.0050707	11	174	9606	9606.ENSP00000220751,9606.ENSP00000260010,9606.ENSP00000263339,9606.ENSP00000263341,9606.ENSP00000263642,9606.ENSP00000296861,9606.ENSP00000299663,9606.ENSP00000330696,9606.ENSP00000359504,9606.ENSP00000362179,9606.ENSP00000369213	RIPK2,TLR2,IL1A,IL1B,IFIH1,TNFRSF21,CLEC4E,P2RX7,GBP1,ZC3H12A,DDX58	2.86e-06	5.05e-05	regulation of cytokine secretion
Process	GO.1901652	17	431	9606	9606.ENSP00000161559,9606.ENSP00000216797,9606.ENSP00000220751,9606.ENSP00000226574,9606.ENSP00000241261,9606.ENSP00000254958,9606.ENSP00000260010,9606.ENSP00000264832,9606.ENSP00000265087,9606.ENSP00000285379,9606.ENSP00000287814,9606.ENSP00000344479,9606.ENSP00000353362,9606.ENSP00000365280,9606.ENSP00000391676,9606.ENSP00000408617,9606.ENSP00000481570	CEACAM1,NFKBIA,RIPK2,NFKB1,TNFSF10,JAG1,TLR2,ICAM1,STC2,CA2,TIMP4,NR4A2,CACNA1A,ID1,JAK3,HDAC9,TNFAIP3	3.11e-06	5.47e-05	response to peptide
Process	GO.0031323	93	6082	9606	9606.ENSP00000006053,9606.ENSP00000161559,9606.ENSP00000216797,9606.ENSP00000220751,9606.ENSP00000220809,9606.ENSP00000221452,9606.ENSP00000222543,9606.ENSP00000222553,9606.ENSP00000225474,9606.ENSP00000225831,9606.ENSP00000226574,9606.ENSP00000228534,9606.ENSP00000234111,9606.ENSP00000240100,9606.ENSP00000241261,9606.ENSP00000242208,9606.ENSP00000245414,9606.ENSP00000245907,9606.ENSP00000252809,…	CX3CL1,CEACAM1,NFKBIA,RIPK2,PLAT,RELB,TFPI2,NAMPT,CSF3,CCL2,NFKB1,IL23A,ODC1,DUSP4,TNFSF10,INHBA,IRF1,C3,GDF15,JAG1,IRAK2,BHLHE40,FST,DRAM1,TLR2,THBS1,LIPG,IL1A,IL1B,BIRC3,KDR,ICAM1,STC2,SEMA3A,LAMP3,JDP2,NFKBIE,TIMP4,SMAD6,BCL6B,PTX3,ITGA2,SOX17,DAB2,TNIP1,NFKBIZ,P2RX7,SELE,MXD4,ZBTB16,PLAUR,ETV7,NR4A2,BMF,WTAP,CCL20,E2F2,LHX9,BLZF1,NFKB2,GBP1,NFIA,PPAP2B,TSC22D3,ZC3H12A,TRAF1,ID1,DDX58,TRIM22,M…	3.12e-06	5.47e-05	regulation of cellular metabolic process
Process	GO.0051092	10	142	9606	9606.ENSP00000220751,9606.ENSP00000226574,9606.ENSP00000256458,9606.ENSP00000260010,9606.ENSP00000263341,9606.ENSP00000264832,9606.ENSP00000358983,9606.ENSP00000362994,9606.ENSP00000369299,9606.ENSP00000453302	RIPK2,NFKB1,IRAK2,TLR2,IL1B,ICAM1,NFKB2,TRAF1,TRIM22,ADAM8	3.32e-06	5.75e-05	positive regulation of NF-kappaB transcription factor activity
Process	GO.1903708	11	177	9606	9606.ENSP00000220751,9606.ENSP00000225474,9606.ENSP00000228534,9606.ENSP00000242208,9606.ENSP00000254958,9606.ENSP00000285379,9606.ENSP00000325663,9606.ENSP00000338157,9606.ENSP00000376436,9606.ENSP00000392025,9606.ENSP00000453302	RIPK2,CSF3,IL23A,INHBA,JAG1,CA2,NFKBIZ,ZBTB16,ETS1,CYLD,ADAM8	3.34e-06	5.78e-05	positive regulation of hemopoiesis
Process	GO.0072359	24	807	9606	9606.ENSP00000006053,9606.ENSP00000161559,9606.ENSP00000225831,9606.ENSP00000254958,9606.ENSP00000260356,9606.ENSP00000263923,9606.ENSP00000265361,9606.ENSP00000288840,9606.ENSP00000297316,9606.ENSP00000314897,9606.ENSP00000334928,9606.ENSP00000362179,9606.ENSP00000365280,9606.ENSP00000366326,9606.ENSP00000368572,9606.ENSP00000369055,9606.ENSP00000369129,9606.ENSP00000370443,9606.ENSP00000370812,…	CX3CL1,CEACAM1,CCL2,JAG1,THBS1,KDR,SEMA3C,SMAD6,SOX17,ANGPT2,PTPRB,ZC3H12A,ID1,NEBL,SAT1,B4GALT1,DSP,ADAMTS6,ESM1,MSX1,ETS1,TYMP,HDAC9,ADAM8	3.53e-06	6.07e-05	circulatory system development
Process	GO.0002688	9	112	9606	9606.ENSP00000225831,9606.ENSP00000226317,9606.ENSP00000228534,9606.ENSP00000260356,9606.ENSP00000296026,9606.ENSP00000296027,9606.ENSP00000379110,9606.ENSP00000385675,9606.ENSP00000427279	CCL2,CXCL6,IL23A,THBS1,CXCL3,CXCL5,CXCL1,IL6,CXCL2	3.79e-06	6.5e-05	regulation of leukocyte chemotaxis
Process	GO.0051247	36	1587	9606	9606.ENSP00000006053,9606.ENSP00000216797,9606.ENSP00000220751,9606.ENSP00000225474,9606.ENSP00000225831,9606.ENSP00000228534,9606.ENSP00000241261,9606.ENSP00000242208,9606.ENSP00000245414,9606.ENSP00000245907,9606.ENSP00000252809,9606.ENSP00000256458,9606.ENSP00000260356,9606.ENSP00000263339,9606.ENSP00000263341,9606.ENSP00000263464,9606.ENSP00000263923,9606.ENSP00000264832,9606.ENSP00000265362,…	CX3CL1,NFKBIA,RIPK2,CSF3,CCL2,IL23A,TNFSF10,INHBA,IRF1,C3,GDF15,IRAK2,THBS1,IL1A,IL1B,BIRC3,KDR,ICAM1,SEMA3A,JDP2,ITGA2,SOX17,DAB2,TNIP1,P2RX7,PLAUR,CCL20,ZC3H12A,IL24,BCL2L11,IL6,CD44,PDGFC,ADAM8,LDLR,TNFAIP3	5.41e-06	9.19e-05	positive regulation of protein metabolic process
Process	GO.0035690	14	310	9606	9606.ENSP00000220751,9606.ENSP00000226574,9606.ENSP00000245185,9606.ENSP00000263341,9606.ENSP00000263923,9606.ENSP00000264832,9606.ENSP00000330696,9606.ENSP00000362179,9606.ENSP00000365280,9606.ENSP00000372170,9606.ENSP00000376436,9606.ENSP00000384212,9606.ENSP00000385675,9606.ENSP00000481570	RIPK2,NFKB1,MT2A,IL1B,KDR,ICAM1,P2RX7,ZC3H12A,ID1,MSX1,ETS1,IL18BP,IL6,TNFAIP3	5.51e-06	9.32e-05	cellular response to drug
Process	GO.0046903	28	1070	9606	9606.ENSP00000005257,9606.ENSP00000161559,9606.ENSP00000226574,9606.ENSP00000242208,9606.ENSP00000243347,9606.ENSP00000245907,9606.ENSP00000246006,9606.ENSP00000259206,9606.ENSP00000260010,9606.ENSP00000260356,9606.ENSP00000265074,9606.ENSP00000285379,9606.ENSP00000295927,9606.ENSP00000330696,9606.ENSP00000334928,9606.ENSP00000339328,9606.ENSP00000357981,9606.ENSP00000359488,9606.ENSP00000361850,…	RALA,CEACAM1,NFKB1,INHBA,TNFAIP6,C3,CD93,IL1RN,TLR2,THBS1,NPR3,CA2,PTX3,P2RX7,PTPRB,PLAUR,CTSS,GBP5,PLAU,TNFSF13B,B4GALT1,DSP,CXCL1,IL6,CD44,SERPINE2,POU2F2,ADAM8	5.58e-06	9.4e-05	secretion
Process	GO.0060255	92	6072	9606	9606.ENSP00000006053,9606.ENSP00000161559,9606.ENSP00000216797,9606.ENSP00000220751,9606.ENSP00000220809,9606.ENSP00000221452,9606.ENSP00000222543,9606.ENSP00000222553,9606.ENSP00000225474,9606.ENSP00000225831,9606.ENSP00000226574,9606.ENSP00000228534,9606.ENSP00000234111,9606.ENSP00000240100,9606.ENSP00000241261,9606.ENSP00000242208,9606.ENSP00000245414,9606.ENSP00000245907,9606.ENSP00000252809,…	CX3CL1,CEACAM1,NFKBIA,RIPK2,PLAT,RELB,TFPI2,NAMPT,CSF3,CCL2,NFKB1,IL23A,ODC1,DUSP4,TNFSF10,INHBA,IRF1,C3,GDF15,JAG1,IRAK2,BHLHE40,FST,TLR2,THBS1,LIPG,IL1A,IL1B,BIRC3,KDR,ICAM1,STC2,SEMA3A,LAMP3,JDP2,NFKBIE,TIMP4,SMAD6,BCL6B,PTX3,ITGA2,SOX17,FGF5,DAB2,TNIP1,NFKBIZ,P2RX7,SELE,MXD4,ZBTB16,PLAUR,ETV7,NR4A2,WTAP,CCL20,E2F2,LHX9,BLZF1,NFKB2,GBP1,NFIA,PPAP2B,TSC22D3,ZC3H12A,TRAF1,ID1,DDX58,TRIM22,MSX1,I…	5.65e-06	9.49e-05	regulation of macromolecule metabolic process
Process	GO.1903555	9	119	9606	9606.ENSP00000220751,9606.ENSP00000228534,9606.ENSP00000260010,9606.ENSP00000260356,9606.ENSP00000263642,9606.ENSP00000362179,9606.ENSP00000369213,9606.ENSP00000453302,9606.ENSP00000481570	RIPK2,IL23A,TLR2,THBS1,IFIH1,ZC3H12A,DDX58,ADAM8,TNFAIP3	6.02e-06	0.0001	regulation of tumor necrosis factor superfamily cytokine production
Process	GO.0031325	56	3060	9606	9606.ENSP00000006053,9606.ENSP00000216797,9606.ENSP00000220751,9606.ENSP00000221452,9606.ENSP00000222553,9606.ENSP00000225474,9606.ENSP00000225831,9606.ENSP00000226574,9606.ENSP00000228534,9606.ENSP00000241261,9606.ENSP00000242208,9606.ENSP00000245414,9606.ENSP00000245907,9606.ENSP00000252809,9606.ENSP00000254958,9606.ENSP00000256458,9606.ENSP00000260010,9606.ENSP00000260356,9606.ENSP00000263339,…	CX3CL1,NFKBIA,RIPK2,RELB,NAMPT,CSF3,CCL2,NFKB1,IL23A,TNFSF10,INHBA,IRF1,C3,GDF15,JAG1,IRAK2,TLR2,THBS1,IL1A,IL1B,BIRC3,KDR,ICAM1,SEMA3A,JDP2,SMAD6,PTX3,ITGA2,SOX17,DAB2,TNIP1,P2RX7,SELE,ZBTB16,PLAUR,NR4A2,CCL20,E2F2,NFKB2,NFIA,ZC3H12A,DDX58,TRIM22,MSX1,IL24,PID1,ETS1,BCL2L11,IL6,CD44,PDGFC,POU2F2,HMGA2,ADAM8,LDLR,TNFAIP3	6.19e-06	0.0001	positive regulation of cellular metabolic process
Process	GO.0002824	8	89	9606	9606.ENSP00000220751,9606.ENSP00000228534,9606.ENSP00000245907,9606.ENSP00000263341,9606.ENSP00000325663,9606.ENSP00000330696,9606.ENSP00000365048,9606.ENSP00000385675	RIPK2,IL23A,C3,IL1B,NFKBIZ,P2RX7,TNFSF13B,IL6	6.16e-06	0.0001	positive regulation of adaptive immune response based on somatic recombination of immune receptors built from immunoglobulin superfamily domains
Process	GO.0051171	89	5827	9606	9606.ENSP00000006053,9606.ENSP00000161559,9606.ENSP00000216797,9606.ENSP00000220751,9606.ENSP00000220809,9606.ENSP00000221452,9606.ENSP00000222543,9606.ENSP00000222553,9606.ENSP00000225474,9606.ENSP00000225831,9606.ENSP00000226574,9606.ENSP00000228534,9606.ENSP00000234111,9606.ENSP00000240100,9606.ENSP00000241261,9606.ENSP00000242208,9606.ENSP00000245414,9606.ENSP00000245907,9606.ENSP00000252809,…	CX3CL1,CEACAM1,NFKBIA,RIPK2,PLAT,RELB,TFPI2,NAMPT,CSF3,CCL2,NFKB1,IL23A,ODC1,DUSP4,TNFSF10,INHBA,IRF1,C3,GDF15,JAG1,IRAK2,BHLHE40,FST,TLR2,THBS1,LIPG,IL1A,IL1B,BIRC3,KDR,ICAM1,SEMA3A,LAMP3,JDP2,NFKBIE,TIMP4,SMAD6,BCL6B,PTX3,ITGA2,SOX17,DAB2,TNIP1,NFKBIZ,P2RX7,MXD4,ZBTB16,PLAUR,ETV7,NR4A2,WTAP,CCL20,E2F2,LHX9,BLZF1,NFKB2,GBP1,NFIA,PPAP2B,TSC22D3,ZC3H12A,TRAF1,ID1,DDX58,TRIM22,MSX1,IL24,PID1,ETS1,B…	6.69e-06	0.00011	regulation of nitrogen compound metabolic process
Process	GO.0035239	20	615	9606	9606.ENSP00000005257,9606.ENSP00000006053,9606.ENSP00000161559,9606.ENSP00000225831,9606.ENSP00000254958,9606.ENSP00000260356,9606.ENSP00000263923,9606.ENSP00000296575,9606.ENSP00000297316,9606.ENSP00000314897,9606.ENSP00000334928,9606.ENSP00000362179,9606.ENSP00000365280,9606.ENSP00000368572,9606.ENSP00000369055,9606.ENSP00000370812,9606.ENSP00000376436,9606.ENSP00000376943,9606.ENSP00000379038,…	RALA,CX3CL1,CEACAM1,CCL2,JAG1,THBS1,KDR,HHIP,SOX17,ANGPT2,PTPRB,ZC3H12A,ID1,SAT1,B4GALT1,ESM1,ETS1,BCL2L11,TYMP,ADAM8	6.9e-06	0.00011	tube morphogenesis
Process	GO.0032940	26	959	9606	9606.ENSP00000005257,9606.ENSP00000161559,9606.ENSP00000226574,9606.ENSP00000242208,9606.ENSP00000243347,9606.ENSP00000245907,9606.ENSP00000246006,9606.ENSP00000259206,9606.ENSP00000260010,9606.ENSP00000260356,9606.ENSP00000295927,9606.ENSP00000330696,9606.ENSP00000334928,9606.ENSP00000339328,9606.ENSP00000357981,9606.ENSP00000359488,9606.ENSP00000361850,9606.ENSP00000365048,9606.ENSP00000369055,…	RALA,CEACAM1,NFKB1,INHBA,TNFAIP6,C3,CD93,IL1RN,TLR2,THBS1,PTX3,P2RX7,PTPRB,PLAUR,CTSS,GBP5,PLAU,TNFSF13B,B4GALT1,DSP,CXCL1,IL6,CD44,SERPINE2,POU2F2,ADAM8	6.8e-06	0.00011	secretion by cell
Process	GO.0002697	15	362	9606	9606.ENSP00000161559,9606.ENSP00000220751,9606.ENSP00000228534,9606.ENSP00000245907,9606.ENSP00000251642,9606.ENSP00000263341,9606.ENSP00000263464,9606.ENSP00000325663,9606.ENSP00000330696,9606.ENSP00000362179,9606.ENSP00000369213,9606.ENSP00000385675,9606.ENSP00000391676,9606.ENSP00000438615,9606.ENSP00000481570	CEACAM1,RIPK2,IL23A,C3,DHX58,IL1B,BIRC3,NFKBIZ,P2RX7,ZC3H12A,DDX58,IL6,JAK3,C1R,TNFAIP3	6.86e-06	0.00011	regulation of immune effector process
Process	GO.0002366	20	616	9606	9606.ENSP00000161559,9606.ENSP00000221452,9606.ENSP00000226574,9606.ENSP00000243347,9606.ENSP00000245907,9606.ENSP00000246006,9606.ENSP00000260010,9606.ENSP00000264832,9606.ENSP00000295927,9606.ENSP00000299663,9606.ENSP00000334928,9606.ENSP00000339328,9606.ENSP00000357981,9606.ENSP00000361850,9606.ENSP00000369055,9606.ENSP00000369129,9606.ENSP00000379110,9606.ENSP00000385675,9606.ENSP00000398632,…	CEACAM1,RELB,NFKB1,TNFAIP6,C3,CD93,TLR2,ICAM1,PTX3,CLEC4E,PTPRB,PLAUR,CTSS,PLAU,B4GALT1,DSP,CXCL1,IL6,CD44,ADAM8	7.06e-06	0.00011	leukocyte activation involved in immune response
Process	GO.0010604	56	3081	9606	9606.ENSP00000006053,9606.ENSP00000216797,9606.ENSP00000220751,9606.ENSP00000221452,9606.ENSP00000222553,9606.ENSP00000225474,9606.ENSP00000225831,9606.ENSP00000226574,9606.ENSP00000228534,9606.ENSP00000241261,9606.ENSP00000242208,9606.ENSP00000245414,9606.ENSP00000245907,9606.ENSP00000252809,9606.ENSP00000254958,9606.ENSP00000256458,9606.ENSP00000260010,9606.ENSP00000260356,9606.ENSP00000263339,…	CX3CL1,NFKBIA,RIPK2,RELB,NAMPT,CSF3,CCL2,NFKB1,IL23A,TNFSF10,INHBA,IRF1,C3,GDF15,JAG1,IRAK2,TLR2,THBS1,IL1A,IL1B,BIRC3,KDR,ICAM1,SEMA3A,LAMP3,JDP2,SMAD6,ITGA2,SOX17,DAB2,TNIP1,P2RX7,SELE,ZBTB16,PLAUR,NR4A2,CCL20,E2F2,NFKB2,NFIA,ZC3H12A,ID1,DDX58,MSX1,IL24,PID1,ETS1,BCL2L11,IL6,CD44,PDGFC,POU2F2,HMGA2,ADAM8,LDLR,TNFAIP3	7.6e-06	0.00012	positive regulation of macromolecule metabolic process
Process	GO.0002690	8	91	9606	9606.ENSP00000226317,9606.ENSP00000228534,9606.ENSP00000260356,9606.ENSP00000296026,9606.ENSP00000296027,9606.ENSP00000379110,9606.ENSP00000385675,9606.ENSP00000427279	CXCL6,IL23A,THBS1,CXCL3,CXCL5,CXCL1,IL6,CXCL2	7.18e-06	0.00012	positive regulation of leukocyte chemotaxis
Process	GO.0061041	9	124	9606	9606.ENSP00000161559,9606.ENSP00000220809,9606.ENSP00000260356,9606.ENSP00000339328,9606.ENSP00000360296,9606.ENSP00000361850,9606.ENSP00000405405,9606.ENSP00000415786,9606.ENSP00000481570	CEACAM1,PLAT,THBS1,PLAUR,PPAP2B,PLAU,PHLDB2,SERPINE2,TNFAIP3	8.24e-06	0.00013	regulation of wound healing
Process	GO.0045619	10	158	9606	9606.ENSP00000220751,9606.ENSP00000228534,9606.ENSP00000242208,9606.ENSP00000245414,9606.ENSP00000325663,9606.ENSP00000338157,9606.ENSP00000362179,9606.ENSP00000391676,9606.ENSP00000392025,9606.ENSP00000453302	RIPK2,IL23A,INHBA,IRF1,NFKBIZ,ZBTB16,ZC3H12A,JAK3,CYLD,ADAM8	8.08e-06	0.00013	regulation of lymphocyte differentiation
Process	GO.0051173	54	2946	9606	9606.ENSP00000006053,9606.ENSP00000216797,9606.ENSP00000220751,9606.ENSP00000221452,9606.ENSP00000222553,9606.ENSP00000225474,9606.ENSP00000225831,9606.ENSP00000226574,9606.ENSP00000228534,9606.ENSP00000241261,9606.ENSP00000242208,9606.ENSP00000245414,9606.ENSP00000245907,9606.ENSP00000252809,9606.ENSP00000254958,9606.ENSP00000256458,9606.ENSP00000260010,9606.ENSP00000260356,9606.ENSP00000263339,…	CX3CL1,NFKBIA,RIPK2,RELB,NAMPT,CSF3,CCL2,NFKB1,IL23A,TNFSF10,INHBA,IRF1,C3,GDF15,JAG1,IRAK2,TLR2,THBS1,IL1A,IL1B,BIRC3,KDR,ICAM1,SEMA3A,JDP2,SMAD6,PTX3,ITGA2,SOX17,DAB2,TNIP1,P2RX7,ZBTB16,PLAUR,NR4A2,CCL20,E2F2,NFKB2,NFIA,ZC3H12A,DDX58,MSX1,IL24,PID1,ETS1,BCL2L11,IL6,CD44,PDGFC,POU2F2,HMGA2,ADAM8,LDLR,TNFAIP3	9.27e-06	0.00015	positive regulation of nitrogen compound metabolic process
Process	GO.0045944	28	1104	9606	9606.ENSP00000216797,9606.ENSP00000220751,9606.ENSP00000221452,9606.ENSP00000222553,9606.ENSP00000225474,9606.ENSP00000226574,9606.ENSP00000228534,9606.ENSP00000242208,9606.ENSP00000245414,9606.ENSP00000254958,9606.ENSP00000260010,9606.ENSP00000263339,9606.ENSP00000263341,9606.ENSP00000288840,9606.ENSP00000297316,9606.ENSP00000317891,9606.ENSP00000344479,9606.ENSP00000355249,9606.ENSP00000358983,…	NFKBIA,RIPK2,RELB,NAMPT,CSF3,NFKB1,IL23A,INHBA,IRF1,JAG1,TLR2,IL1A,IL1B,SMAD6,SOX17,TNIP1,NR4A2,E2F2,NFKB2,NFIA,ZC3H12A,DDX58,MSX1,PID1,ETS1,IL6,POU2F2,HMGA2	9.84e-06	0.00015	positive regulation of transcription by RNA polymerase II
Process	GO.0032480	6	43	9606	9606.ENSP00000221452,9606.ENSP00000251642,9606.ENSP00000263642,9606.ENSP00000369213,9606.ENSP00000392025,9606.ENSP00000481570	RELB,DHX58,IFIH1,DDX58,CYLD,TNFAIP3	9.42e-06	0.00015	negative regulation of type I interferon production
Process	GO.0002274	19	574	9606	9606.ENSP00000004531,9606.ENSP00000161559,9606.ENSP00000221452,9606.ENSP00000226317,9606.ENSP00000226574,9606.ENSP00000243347,9606.ENSP00000245907,9606.ENSP00000246006,9606.ENSP00000260010,9606.ENSP00000295927,9606.ENSP00000334928,9606.ENSP00000339328,9606.ENSP00000357981,9606.ENSP00000361850,9606.ENSP00000369055,9606.ENSP00000369129,9606.ENSP00000379110,9606.ENSP00000398632,9606.ENSP00000453302	SLC7A2,CEACAM1,RELB,CXCL6,NFKB1,TNFAIP6,C3,CD93,TLR2,PTX3,PTPRB,PLAUR,CTSS,PLAU,B4GALT1,DSP,CXCL1,CD44,ADAM8	9.31e-06	0.00015	myeloid leukocyte activation
Process	GO.0042035	8	96	9606	9606.ENSP00000226574,9606.ENSP00000242208,9606.ENSP00000245414,9606.ENSP00000260356,9606.ENSP00000263339,9606.ENSP00000263341,9606.ENSP00000351671,9606.ENSP00000385675	NFKB1,INHBA,IRF1,THBS1,IL1A,IL1B,CCL20,IL6	1.03e-05	0.00016	regulation of cytokine biosynthetic process
Process	GO.0030097	18	526	9606	9606.ENSP00000221452,9606.ENSP00000225474,9606.ENSP00000228280,9606.ENSP00000242208,9606.ENSP00000245414,9606.ENSP00000254958,9606.ENSP00000256759,9606.ENSP00000260010,9606.ENSP00000263923,9606.ENSP00000264346,9606.ENSP00000294728,9606.ENSP00000299663,9606.ENSP00000338157,9606.ENSP00000385675,9606.ENSP00000391676,9606.ENSP00000392025,9606.ENSP00000408617,9606.ENSP00000431603	RELB,CSF3,KITLG,INHBA,IRF1,JAG1,FST,TLR2,KDR,HERC6,VCAM1,CLEC4E,ZBTB16,IL6,JAK3,CYLD,HDAC9,POU2F2	1.05e-05	0.00016	hemopoiesis
Process	GO.1905952	9	129	9606	9606.ENSP00000216797,9606.ENSP00000226574,9606.ENSP00000245907,9606.ENSP00000260356,9606.ENSP00000261292,9606.ENSP00000263341,9606.ENSP00000330696,9606.ENSP00000362179,9606.ENSP00000385675	NFKBIA,NFKB1,C3,THBS1,LIPG,IL1B,P2RX7,ZC3H12A,IL6	1.11e-05	0.00017	regulation of lipid localization
Process	GO.1901698	26	988	9606	9606.ENSP00000161559,9606.ENSP00000216797,9606.ENSP00000220751,9606.ENSP00000226574,9606.ENSP00000241261,9606.ENSP00000254958,9606.ENSP00000260010,9606.ENSP00000263341,9606.ENSP00000263642,9606.ENSP00000264832,9606.ENSP00000265087,9606.ENSP00000285379,9606.ENSP00000287814,9606.ENSP00000296585,9606.ENSP00000322706,9606.ENSP00000330696,9606.ENSP00000344479,9606.ENSP00000353362,9606.ENSP00000365280,…	CEACAM1,NFKBIA,RIPK2,NFKB1,TNFSF10,JAG1,TLR2,IL1B,IFIH1,ICAM1,STC2,CA2,TIMP4,ITGA2,HMGCS1,P2RX7,NR4A2,CACNA1A,ID1,DDX58,IL6,JAK3,HDAC9,PDGFC,LDLR,TNFAIP3	1.13e-05	0.00017	response to nitrogen compound
Process	GO.0045807	9	129	9606	9606.ENSP00000225831,9606.ENSP00000245907,9606.ENSP00000263341,9606.ENSP00000295927,9606.ENSP00000296585,9606.ENSP00000313391,9606.ENSP00000331736,9606.ENSP00000360076,9606.ENSP00000454071	CCL2,C3,IL1B,PTX3,ITGA2,DAB2,SELE,SGIP1,LDLR	1.11e-05	0.00017	positive regulation of endocytosis
Process	GO.0002683	16	425	9606	9606.ENSP00000161559,9606.ENSP00000216797,9606.ENSP00000225831,9606.ENSP00000242208,9606.ENSP00000245414,9606.ENSP00000251642,9606.ENSP00000260356,9606.ENSP00000296861,9606.ENSP00000338157,9606.ENSP00000359504,9606.ENSP00000361458,9606.ENSP00000362179,9606.ENSP00000391676,9606.ENSP00000392025,9606.ENSP00000454071,9606.ENSP00000481570	CEACAM1,NFKBIA,CCL2,INHBA,IRF1,DHX58,THBS1,TNFRSF21,ZBTB16,GBP1,TSC22D3,ZC3H12A,JAK3,CYLD,LDLR,TNFAIP3	1.07e-05	0.00017	negative regulation of immune system process
Process	GO.0045580	9	130	9606	9606.ENSP00000220751,9606.ENSP00000228534,9606.ENSP00000245414,9606.ENSP00000325663,9606.ENSP00000338157,9606.ENSP00000362179,9606.ENSP00000391676,9606.ENSP00000392025,9606.ENSP00000453302	RIPK2,IL23A,IRF1,NFKBIZ,ZBTB16,ZC3H12A,JAK3,CYLD,ADAM8	1.18e-05	0.00018	regulation of T cell differentiation
Process	GO.1903557	7	70	9606	9606.ENSP00000220751,9606.ENSP00000228534,9606.ENSP00000260010,9606.ENSP00000260356,9606.ENSP00000263642,9606.ENSP00000369213,9606.ENSP00000453302	RIPK2,IL23A,TLR2,THBS1,IFIH1,DDX58,ADAM8	1.25e-05	0.00019	positive regulation of tumor necrosis factor superfamily cytokine production
Process	GO.0050688	7	71	9606	9606.ENSP00000228534,9606.ENSP00000251642,9606.ENSP00000263341,9606.ENSP00000263464,9606.ENSP00000362179,9606.ENSP00000369213,9606.ENSP00000481570	IL23A,DHX58,IL1B,BIRC3,ZC3H12A,DDX58,TNFAIP3	1.36e-05	0.0002	regulation of defense response to virus
Process	GO.0010243	24	876	9606	9606.ENSP00000161559,9606.ENSP00000216797,9606.ENSP00000220751,9606.ENSP00000226574,9606.ENSP00000241261,9606.ENSP00000254958,9606.ENSP00000260010,9606.ENSP00000263341,9606.ENSP00000264832,9606.ENSP00000265087,9606.ENSP00000285379,9606.ENSP00000287814,9606.ENSP00000296585,9606.ENSP00000322706,9606.ENSP00000330696,9606.ENSP00000344479,9606.ENSP00000353362,9606.ENSP00000365280,9606.ENSP00000385675,…	CEACAM1,NFKBIA,RIPK2,NFKB1,TNFSF10,JAG1,TLR2,IL1B,ICAM1,STC2,CA2,TIMP4,ITGA2,HMGCS1,P2RX7,NR4A2,CACNA1A,ID1,IL6,JAK3,HDAC9,PDGFC,LDLR,TNFAIP3	1.34e-05	0.0002	response to organonitrogen compound
Process	GO.0002460	9	132	9606	9606.ENSP00000221452,9606.ENSP00000245907,9606.ENSP00000254958,9606.ENSP00000264832,9606.ENSP00000358983,9606.ENSP00000384212,9606.ENSP00000385675,9606.ENSP00000431603,9606.ENSP00000438615	RELB,C3,JAG1,ICAM1,NFKB2,IL18BP,IL6,POU2F2,C1R	1.32e-05	0.0002	adaptive immune response based on somatic recombination of immune receptors built from immunoglobulin superfamily domains
Process	GO.0051130	28	1128	9606	9606.ENSP00000005257,9606.ENSP00000006053,9606.ENSP00000225474,9606.ENSP00000225831,9606.ENSP00000241261,9606.ENSP00000245907,9606.ENSP00000252809,9606.ENSP00000263339,9606.ENSP00000263341,9606.ENSP00000263923,9606.ENSP00000264832,9606.ENSP00000267569,9606.ENSP00000295522,9606.ENSP00000295927,9606.ENSP00000296585,9606.ENSP00000313391,9606.ENSP00000330696,9606.ENSP00000331736,9606.ENSP00000339328,…	RALA,CX3CL1,CSF3,CCL2,TNFSF10,C3,GDF15,IL1A,IL1B,KDR,ICAM1,JDP2,CLDN1,PTX3,ITGA2,DAB2,P2RX7,SELE,PLAUR,BMF,GBP5,SGIP1,ID1,MSX1,BCL2L11,NAV3,PHLDB2,LDLR	1.45e-05	0.00021	positive regulation of cellular component organization
Process	GO.0051128	45	2306	9606	9606.ENSP00000005257,9606.ENSP00000006053,9606.ENSP00000161559,9606.ENSP00000225474,9606.ENSP00000225831,9606.ENSP00000241261,9606.ENSP00000242208,9606.ENSP00000245907,9606.ENSP00000252809,9606.ENSP00000260010,9606.ENSP00000260356,9606.ENSP00000260983,9606.ENSP00000263339,9606.ENSP00000263341,9606.ENSP00000263923,9606.ENSP00000264832,9606.ENSP00000265362,9606.ENSP00000267569,9606.ENSP00000288840,…	RALA,CX3CL1,CEACAM1,CSF3,CCL2,TNFSF10,INHBA,C3,GDF15,TLR2,THBS1,HECW2,IL1A,IL1B,KDR,ICAM1,SEMA3A,JDP2,SMAD6,CLDN1,PTX3,ITGA2,SOX17,DAB2,P2RX7,SELE,PLAUR,BMF,BLZF1,SEMA6C,GBP5,GBP1,SGIP1,ID1,ESM1,MSX1,PID1,ETS1,BCL2L11,NAV3,CYLD,CD44,PHLDB2,SERPINE2,LDLR	1.43e-05	0.00021	regulation of cellular component organization
Process	GO.0019220	36	1657	9606	9606.ENSP00000006053,9606.ENSP00000161559,9606.ENSP00000220751,9606.ENSP00000225474,9606.ENSP00000225831,9606.ENSP00000228534,9606.ENSP00000240100,9606.ENSP00000242208,9606.ENSP00000245907,9606.ENSP00000252809,9606.ENSP00000256458,9606.ENSP00000260356,9606.ENSP00000263341,9606.ENSP00000263923,9606.ENSP00000264832,9606.ENSP00000265362,9606.ENSP00000288840,9606.ENSP00000296585,9606.ENSP00000313391,…	CX3CL1,CEACAM1,RIPK2,CSF3,CCL2,IL23A,DUSP4,INHBA,C3,GDF15,IRAK2,THBS1,IL1B,KDR,ICAM1,SEMA3A,SMAD6,ITGA2,DAB2,TNIP1,P2RX7,PLAUR,CCL20,GBP1,PPAP2B,ZC3H12A,ID1,IL24,PID1,IL6,CD44,PDGFC,ADAM8,LDLR,CNKSR3,TNFAIP3	1.37e-05	0.00021	regulation of phosphate metabolic process
Process	GO.0044403	20	650	9606	9606.ENSP00000005257,9606.ENSP00000216797,9606.ENSP00000225831,9606.ENSP00000246006,9606.ENSP00000251642,9606.ENSP00000263642,9606.ENSP00000263923,9606.ENSP00000264832,9606.ENSP00000294728,9606.ENSP00000295522,9606.ENSP00000295927,9606.ENSP00000296585,9606.ENSP00000317891,9606.ENSP00000360231,9606.ENSP00000362179,9606.ENSP00000369213,9606.ENSP00000369299,9606.ENSP00000376943,9606.ENSP00000437621,…	RALA,NFKBIA,CCL2,CD93,DHX58,IFIH1,KDR,ICAM1,VCAM1,CLDN1,PTX3,ITGA2,TNIP1,NFIA,ZC3H12A,DDX58,TRIM22,BCL2L11,HMGA2,LDLR	1.51e-05	0.00022	symbiont process
Process	GO.0035556	34	1528	9606	9606.ENSP00000005257,9606.ENSP00000216797,9606.ENSP00000220751,9606.ENSP00000221452,9606.ENSP00000225831,9606.ENSP00000226574,9606.ENSP00000228280,9606.ENSP00000256458,9606.ENSP00000260010,9606.ENSP00000263341,9606.ENSP00000263464,9606.ENSP00000263642,9606.ENSP00000263923,9606.ENSP00000265074,9606.ENSP00000265080,9606.ENSP00000294728,9606.ENSP00000299759,9606.ENSP00000311697,9606.ENSP00000330696,…	RALA,NFKBIA,RIPK2,RELB,CCL2,NFKB1,KITLG,IRAK2,TLR2,IL1B,BIRC3,IFIH1,KDR,NPR3,RASGRF2,VCAM1,RRAD,FGF5,P2RX7,SELE,RAPGEF5,CCL20,E2F2,NUAK2,NFKB2,DDX58,SDCBP2,BCL2L11,CXCL1,JAK3,CYLD,DOCK4,PLA2G4C,TNFAIP3	1.53e-05	0.00022	intracellular signal transduction
Process	GO.0009891	39	1876	9606	9606.ENSP00000216797,9606.ENSP00000220751,9606.ENSP00000221452,9606.ENSP00000222553,9606.ENSP00000225474,9606.ENSP00000225831,9606.ENSP00000226574,9606.ENSP00000228534,9606.ENSP00000242208,9606.ENSP00000245414,9606.ENSP00000254958,9606.ENSP00000260010,9606.ENSP00000260356,9606.ENSP00000263339,9606.ENSP00000263341,9606.ENSP00000263923,9606.ENSP00000264832,9606.ENSP00000288840,9606.ENSP00000295927,…	NFKBIA,RIPK2,RELB,NAMPT,CSF3,CCL2,NFKB1,IL23A,INHBA,IRF1,JAG1,TLR2,THBS1,IL1A,IL1B,KDR,ICAM1,SMAD6,PTX3,ITGA2,SOX17,DAB2,TNIP1,P2RX7,ZBTB16,NR4A2,CCL20,E2F2,NFKB2,NFIA,ZC3H12A,DDX58,MSX1,PID1,ETS1,IL6,POU2F2,HMGA2,LDLR	1.53e-05	0.00022	positive regulation of biosynthetic process
Process	GO.0070423	5	27	9606	9606.ENSP00000216797,9606.ENSP00000220751,9606.ENSP00000256458,9606.ENSP00000392025,9606.ENSP00000481570	NFKBIA,RIPK2,IRAK2,CYLD,TNFAIP3	1.59e-05	0.00023	nucleotide-binding oligomerization domain containing signaling pathway
Process	GO.0065008	61	3559	9606	9606.ENSP00000004531,9606.ENSP00000161559,9606.ENSP00000216797,9606.ENSP00000220809,9606.ENSP00000222543,9606.ENSP00000225474,9606.ENSP00000225831,9606.ENSP00000226574,9606.ENSP00000242208,9606.ENSP00000243457,9606.ENSP00000245185,9606.ENSP00000245414,9606.ENSP00000245907,9606.ENSP00000259206,9606.ENSP00000260010,9606.ENSP00000260356,9606.ENSP00000261292,9606.ENSP00000262461,9606.ENSP00000263339,…	SLC7A2,CEACAM1,NFKBIA,PLAT,TFPI2,CSF3,CCL2,NFKB1,INHBA,KCNJ2,MT2A,IRF1,C3,IL1RN,TLR2,THBS1,LIPG,SLC12A2,IL1A,IL1B,KDR,ICAM1,NPR3,STC2,SEMA3A,NFKBIE,CA2,SLC26A2,CLDN1,PTX3,ITGA2,SOX17,P2RX7,PLAUR,BMF,CACNA1A,SEMA6C,SGIP1,PPAP2B,TSC22D3,PLAU,KCNK15,ZC3H12A,TNFSF13B,ID1,DSP,MSX1,PID1,ETS1,BCL2L11,IL6,JAK3,CYLD,DOCK4,SERPINE2,GCH1,PDGFC,SOD2,ADAM8,LDLR,TNFAIP3	1.6e-05	0.00023	regulation of biological quality
Process	GO.0048513	53	2926	9606	9606.ENSP00000216797,9606.ENSP00000221452,9606.ENSP00000225474,9606.ENSP00000225831,9606.ENSP00000228280,9606.ENSP00000234111,9606.ENSP00000241261,9606.ENSP00000242208,9606.ENSP00000245414,9606.ENSP00000254958,9606.ENSP00000256759,9606.ENSP00000260010,9606.ENSP00000263923,9606.ENSP00000264346,9606.ENSP00000264832,9606.ENSP00000265087,9606.ENSP00000265361,9606.ENSP00000265362,9606.ENSP00000285379,…	NFKBIA,RELB,CSF3,CCL2,KITLG,ODC1,TNFSF10,INHBA,IRF1,JAG1,FST,TLR2,KDR,HERC6,ICAM1,STC2,SEMA3C,SEMA3A,CA2,SMAD6,VCAM1,CLDN1,HHIP,ITGA2,SOX17,CLEC4E,ANGPT2,HMGCS1,P2RX7,ZBTB16,ETV7,NR4A2,LHX9,NFKB2,NFIA,ID1,NEBL,B4GALT1,DSP,ADAMTS6,MSX1,ETS1,BCL2L11,IL6,JAK3,CYLD,CD44,KBTBD8,HDAC9,SERPINE2,PDGFC,POU2F2,HMGA2	1.62e-05	0.00023	animal organ development
Process	GO.0009612	11	210	9606	9606.ENSP00000216797,9606.ENSP00000226574,9606.ENSP00000243457,9606.ENSP00000245414,9606.ENSP00000260356,9606.ENSP00000263341,9606.ENSP00000296585,9606.ENSP00000314897,9606.ENSP00000330696,9606.ENSP00000376436,9606.ENSP00000415786	NFKBIA,NFKB1,KCNJ2,IRF1,THBS1,IL1B,ITGA2,ANGPT2,P2RX7,ETS1,SERPINE2	1.55e-05	0.00023	response to mechanical stimulus
Process	GO.0002696	13	298	9606	9606.ENSP00000220751,9606.ENSP00000225831,9606.ENSP00000228534,9606.ENSP00000260356,9606.ENSP00000263341,9606.ENSP00000294728,9606.ENSP00000325663,9606.ENSP00000338157,9606.ENSP00000365048,9606.ENSP00000385675,9606.ENSP00000391676,9606.ENSP00000392025,9606.ENSP00000453302	RIPK2,CCL2,IL23A,THBS1,IL1B,VCAM1,NFKBIZ,ZBTB16,TNFSF13B,IL6,JAK3,CYLD,ADAM8	1.7e-05	0.00024	positive regulation of leukocyte activation
Process	GO.0031399	37	1747	9606	9606.ENSP00000006053,9606.ENSP00000161559,9606.ENSP00000220751,9606.ENSP00000225474,9606.ENSP00000225831,9606.ENSP00000228534,9606.ENSP00000240100,9606.ENSP00000242208,9606.ENSP00000245907,9606.ENSP00000252809,9606.ENSP00000256458,9606.ENSP00000260356,9606.ENSP00000263341,9606.ENSP00000263464,9606.ENSP00000263923,9606.ENSP00000264832,9606.ENSP00000265362,9606.ENSP00000267569,9606.ENSP00000288840,…	CX3CL1,CEACAM1,RIPK2,CSF3,CCL2,IL23A,DUSP4,INHBA,C3,GDF15,IRAK2,THBS1,IL1B,BIRC3,KDR,ICAM1,SEMA3A,JDP2,SMAD6,DAB2,TNIP1,P2RX7,PLAUR,CCL20,GBP1,PPAP2B,ZC3H12A,ID1,IL24,PID1,IL6,CD44,PDGFC,FRY,ADAM8,CNKSR3,TNFAIP3	1.77e-05	0.00025	regulation of protein modification process
Process	GO.0042119	17	497	9606	9606.ENSP00000161559,9606.ENSP00000226317,9606.ENSP00000226574,9606.ENSP00000243347,9606.ENSP00000245907,9606.ENSP00000246006,9606.ENSP00000260010,9606.ENSP00000295927,9606.ENSP00000334928,9606.ENSP00000339328,9606.ENSP00000357981,9606.ENSP00000361850,9606.ENSP00000369055,9606.ENSP00000369129,9606.ENSP00000379110,9606.ENSP00000398632,9606.ENSP00000453302	CEACAM1,CXCL6,NFKB1,TNFAIP6,C3,CD93,TLR2,PTX3,PTPRB,PLAUR,CTSS,PLAU,B4GALT1,DSP,CXCL1,CD44,ADAM8	1.87e-05	0.00026	neutrophil activation
Process	GO.0032648	6	49	9606	9606.ENSP00000220751,9606.ENSP00000221452,9606.ENSP00000245414,9606.ENSP00000260010,9606.ENSP00000263642,9606.ENSP00000369213	RIPK2,RELB,IRF1,TLR2,IFIH1,DDX58	1.86e-05	0.00026	regulation of interferon-beta production
Process	GO.0007159	6	49	9606	9606.ENSP00000263341,9606.ENSP00000264832,9606.ENSP00000294728,9606.ENSP00000317891,9606.ENSP00000331736,9606.ENSP00000398632	IL1B,ICAM1,VCAM1,TNIP1,SELE,CD44	1.86e-05	0.00026	leukocyte cell-cell adhesion
Process	GO.0010628	38	1826	9606	9606.ENSP00000216797,9606.ENSP00000220751,9606.ENSP00000221452,9606.ENSP00000222553,9606.ENSP00000225474,9606.ENSP00000226574,9606.ENSP00000228534,9606.ENSP00000242208,9606.ENSP00000245414,9606.ENSP00000245907,9606.ENSP00000254958,9606.ENSP00000260010,9606.ENSP00000260356,9606.ENSP00000263339,9606.ENSP00000263341,9606.ENSP00000265598,9606.ENSP00000288840,9606.ENSP00000296585,9606.ENSP00000297316,…	NFKBIA,RIPK2,RELB,NAMPT,CSF3,NFKB1,IL23A,INHBA,IRF1,C3,JAG1,TLR2,THBS1,IL1A,IL1B,LAMP3,SMAD6,ITGA2,SOX17,DAB2,TNIP1,P2RX7,ZBTB16,NR4A2,E2F2,NFKB2,NFIA,ZC3H12A,ID1,DDX58,MSX1,PID1,ETS1,IL6,POU2F2,HMGA2,ADAM8,LDLR	1.96e-05	0.00028	positive regulation of gene expression
Process	GO.1905954	7	76	9606	9606.ENSP00000216797,9606.ENSP00000226574,9606.ENSP00000245907,9606.ENSP00000261292,9606.ENSP00000263341,9606.ENSP00000330696,9606.ENSP00000362179	NFKBIA,NFKB1,C3,LIPG,IL1B,P2RX7,ZC3H12A	2.05e-05	0.00029	positive regulation of lipid localization
Process	GO.0050866	10	177	9606	9606.ENSP00000161559,9606.ENSP00000242208,9606.ENSP00000245414,9606.ENSP00000296861,9606.ENSP00000362179,9606.ENSP00000391676,9606.ENSP00000392025,9606.ENSP00000415786,9606.ENSP00000454071,9606.ENSP00000481570	CEACAM1,INHBA,IRF1,TNFRSF21,ZC3H12A,JAK3,CYLD,SERPINE2,LDLR,TNFAIP3	2.06e-05	0.00029	negative regulation of cell activation
Process	GO.2001234	11	218	9606	9606.ENSP00000006053,9606.ENSP00000241261,9606.ENSP00000260356,9606.ENSP00000263339,9606.ENSP00000263341,9606.ENSP00000264832,9606.ENSP00000339328,9606.ENSP00000344479,9606.ENSP00000398632,9606.ENSP00000446252,9606.ENSP00000481570	CX3CL1,TNFSF10,THBS1,IL1A,IL1B,ICAM1,PLAUR,NR4A2,CD44,SOD2,TNFAIP3	2.16e-05	0.0003	negative regulation of apoptotic signaling pathway
Process	GO.1902105	12	261	9606	9606.ENSP00000161559,9606.ENSP00000220751,9606.ENSP00000228534,9606.ENSP00000242208,9606.ENSP00000245414,9606.ENSP00000285379,9606.ENSP00000325663,9606.ENSP00000338157,9606.ENSP00000362179,9606.ENSP00000391676,9606.ENSP00000392025,9606.ENSP00000453302	CEACAM1,RIPK2,IL23A,INHBA,IRF1,CA2,NFKBIZ,ZBTB16,ZC3H12A,JAK3,CYLD,ADAM8	2.21e-05	0.0003	regulation of leukocyte differentiation
Process	GO.0032270	33	1496	9606	9606.ENSP00000006053,9606.ENSP00000216797,9606.ENSP00000220751,9606.ENSP00000225474,9606.ENSP00000225831,9606.ENSP00000228534,9606.ENSP00000241261,9606.ENSP00000242208,9606.ENSP00000245907,9606.ENSP00000252809,9606.ENSP00000256458,9606.ENSP00000260356,9606.ENSP00000263341,9606.ENSP00000263464,9606.ENSP00000263923,9606.ENSP00000264832,9606.ENSP00000265362,9606.ENSP00000267569,9606.ENSP00000296585,…	CX3CL1,NFKBIA,RIPK2,CSF3,CCL2,IL23A,TNFSF10,INHBA,C3,GDF15,IRAK2,THBS1,IL1B,BIRC3,KDR,ICAM1,SEMA3A,JDP2,ITGA2,DAB2,TNIP1,P2RX7,PLAUR,CCL20,ZC3H12A,IL24,BCL2L11,IL6,CD44,PDGFC,ADAM8,LDLR,TNFAIP3	2.48e-05	0.00034	positive regulation of cellular protein metabolic process
Process	GO.0043410	17	512	9606	9606.ENSP00000006053,9606.ENSP00000220751,9606.ENSP00000225831,9606.ENSP00000252809,9606.ENSP00000256458,9606.ENSP00000260356,9606.ENSP00000263341,9606.ENSP00000263923,9606.ENSP00000264832,9606.ENSP00000265362,9606.ENSP00000330696,9606.ENSP00000351671,9606.ENSP00000362179,9606.ENSP00000385675,9606.ENSP00000398632,9606.ENSP00000422464,9606.ENSP00000453302	CX3CL1,RIPK2,CCL2,GDF15,IRAK2,THBS1,IL1B,KDR,ICAM1,SEMA3A,P2RX7,CCL20,ZC3H12A,IL6,CD44,PDGFC,ADAM8	2.7e-05	0.00037	positive regulation of MAPK cascade
Process	GO.0032663	6	53	9606	9606.ENSP00000220751,9606.ENSP00000263339,9606.ENSP00000263341,9606.ENSP00000359504,9606.ENSP00000381007,9606.ENSP00000481570	RIPK2,IL1A,IL1B,GBP1,NAV3,TNFAIP3	2.79e-05	0.00038	regulation of interleukin-2 production
Process	GO.0045123	5	31	9606	9606.ENSP00000006053,9606.ENSP00000225831,9606.ENSP00000264832,9606.ENSP00000294728,9606.ENSP00000331736	CX3CL1,CCL2,ICAM1,VCAM1,SELE	2.88e-05	0.00039	cellular extravasation
Process	GO.0045937	26	1052	9606	9606.ENSP00000006053,9606.ENSP00000220751,9606.ENSP00000225474,9606.ENSP00000225831,9606.ENSP00000228534,9606.ENSP00000242208,9606.ENSP00000245907,9606.ENSP00000252809,9606.ENSP00000256458,9606.ENSP00000260356,9606.ENSP00000263341,9606.ENSP00000263923,9606.ENSP00000264832,9606.ENSP00000265362,9606.ENSP00000296585,9606.ENSP00000313391,9606.ENSP00000330696,9606.ENSP00000339328,9606.ENSP00000351671,…	CX3CL1,RIPK2,CSF3,CCL2,IL23A,INHBA,C3,GDF15,IRAK2,THBS1,IL1B,KDR,ICAM1,SEMA3A,ITGA2,DAB2,P2RX7,PLAUR,CCL20,ZC3H12A,IL24,PID1,IL6,CD44,PDGFC,ADAM8	3.24e-05	0.00044	positive regulation of phosphate metabolic process
Process	GO.0032728	5	32	9606	9606.ENSP00000220751,9606.ENSP00000245414,9606.ENSP00000260010,9606.ENSP00000263642,9606.ENSP00000369213	RIPK2,IRF1,TLR2,IFIH1,DDX58	3.3e-05	0.00044	positive regulation of interferon-beta production
Process	GO.0009636	16	468	9606	9606.ENSP00000225474,9606.ENSP00000226574,9606.ENSP00000260010,9606.ENSP00000263923,9606.ENSP00000264832,9606.ENSP00000294728,9606.ENSP00000295522,9606.ENSP00000344479,9606.ENSP00000362179,9606.ENSP00000372170,9606.ENSP00000376436,9606.ENSP00000384212,9606.ENSP00000385675,9606.ENSP00000408617,9606.ENSP00000446252,9606.ENSP00000481570	CSF3,NFKB1,TLR2,KDR,ICAM1,VCAM1,CLDN1,NR4A2,ZC3H12A,MSX1,ETS1,IL18BP,IL6,HDAC9,SOD2,TNFAIP3	3.34e-05	0.00045	response to toxic substance
Process	GO.0032680	8	115	9606	9606.ENSP00000220751,9606.ENSP00000228534,9606.ENSP00000260010,9606.ENSP00000260356,9606.ENSP00000263642,9606.ENSP00000362179,9606.ENSP00000369213,9606.ENSP00000481570	RIPK2,IL23A,TLR2,THBS1,IFIH1,ZC3H12A,DDX58,TNFAIP3	3.51e-05	0.00047	regulation of tumor necrosis factor production
Process	GO.0042129	9	151	9606	9606.ENSP00000220751,9606.ENSP00000228534,9606.ENSP00000245414,9606.ENSP00000263341,9606.ENSP00000294728,9606.ENSP00000296861,9606.ENSP00000365048,9606.ENSP00000385675,9606.ENSP00000391676	RIPK2,IL23A,IRF1,IL1B,VCAM1,TNFRSF21,TNFSF13B,IL6,JAK3	3.61e-05	0.00048	regulation of T cell proliferation
Process	GO.0050708	15	422	9606	9606.ENSP00000220751,9606.ENSP00000260010,9606.ENSP00000263339,9606.ENSP00000263341,9606.ENSP00000263642,9606.ENSP00000296861,9606.ENSP00000299663,9606.ENSP00000322775,9606.ENSP00000330696,9606.ENSP00000353362,9606.ENSP00000359504,9606.ENSP00000362179,9606.ENSP00000369213,9606.ENSP00000385675,9606.ENSP00000453302	RIPK2,TLR2,IL1A,IL1B,IFIH1,TNFRSF21,CLEC4E,RHBDF2,P2RX7,CACNA1A,GBP1,ZC3H12A,DDX58,IL6,ADAM8	3.86e-05	0.00051	regulation of protein secretion
Process	GO.0050715	8	117	9606	9606.ENSP00000220751,9606.ENSP00000260010,9606.ENSP00000263339,9606.ENSP00000263341,9606.ENSP00000263642,9606.ENSP00000299663,9606.ENSP00000330696,9606.ENSP00000369213	RIPK2,TLR2,IL1A,IL1B,IFIH1,CLEC4E,P2RX7,DDX58	3.95e-05	0.00052	positive regulation of cytokine secretion
Process	GO.0009889	69	4337	9606	9606.ENSP00000161559,9606.ENSP00000216797,9606.ENSP00000220751,9606.ENSP00000221452,9606.ENSP00000222553,9606.ENSP00000225474,9606.ENSP00000225831,9606.ENSP00000226574,9606.ENSP00000228534,9606.ENSP00000242208,9606.ENSP00000245414,9606.ENSP00000245907,9606.ENSP00000252809,9606.ENSP00000254958,9606.ENSP00000256458,9606.ENSP00000256495,9606.ENSP00000256759,9606.ENSP00000260010,9606.ENSP00000260356,…	CEACAM1,NFKBIA,RIPK2,RELB,NAMPT,CSF3,CCL2,NFKB1,IL23A,INHBA,IRF1,C3,GDF15,JAG1,IRAK2,BHLHE40,FST,TLR2,THBS1,IL1A,IL1B,KDR,ICAM1,STC2,SQLE,JDP2,NFKBIE,SMAD6,BCL6B,PTX3,ITGA2,SOX17,DAB2,TNIP1,HMGCS1,NFKBIZ,P2RX7,MXD4,ZBTB16,ETV7,NR4A2,CCL20,E2F2,LHX9,BLZF1,NFKB2,NFIA,PPAP2B,TSC22D3,ZC3H12A,TRAF1,ID1,DDX58,TRIM22,MSX1,PID1,ETS1,IL6,JAK3,CYLD,TSC22D1,KBTBD8,HDAC9,POU2F2,HMGA2,SOD2,ADAM8,LDLR,TNFAIP3	4.12e-05	0.00054	regulation of biosynthetic process
Process	GO.0001934	24	941	9606	9606.ENSP00000006053,9606.ENSP00000220751,9606.ENSP00000225474,9606.ENSP00000225831,9606.ENSP00000228534,9606.ENSP00000242208,9606.ENSP00000245907,9606.ENSP00000252809,9606.ENSP00000256458,9606.ENSP00000260356,9606.ENSP00000263341,9606.ENSP00000263923,9606.ENSP00000264832,9606.ENSP00000265362,9606.ENSP00000313391,9606.ENSP00000330696,9606.ENSP00000339328,9606.ENSP00000351671,9606.ENSP00000362179,…	CX3CL1,RIPK2,CSF3,CCL2,IL23A,INHBA,C3,GDF15,IRAK2,THBS1,IL1B,KDR,ICAM1,SEMA3A,DAB2,P2RX7,PLAUR,CCL20,ZC3H12A,IL24,IL6,CD44,PDGFC,ADAM8	4.13e-05	0.00054	positive regulation of protein phosphorylation
Process	GO.0046634	7	86	9606	9606.ENSP00000220751,9606.ENSP00000228534,9606.ENSP00000245414,9606.ENSP00000325663,9606.ENSP00000338157,9606.ENSP00000362179,9606.ENSP00000391676	RIPK2,IL23A,IRF1,NFKBIZ,ZBTB16,ZC3H12A,JAK3	4.3e-05	0.00056	regulation of alpha-beta T cell activation
Process	GO.0045622	5	34	9606	9606.ENSP00000220751,9606.ENSP00000228534,9606.ENSP00000325663,9606.ENSP00000362179,9606.ENSP00000391676	RIPK2,IL23A,NFKBIZ,ZC3H12A,JAK3	4.29e-05	0.00056	regulation of T-helper cell differentiation
Process	GO.0032495	4	16	9606	9606.ENSP00000216797,9606.ENSP00000220751,9606.ENSP00000254958,9606.ENSP00000481570	NFKBIA,RIPK2,JAG1,TNFAIP3	4.26e-05	0.00056	response to muramyl dipeptide
Process	GO.0034405	5	35	9606	9606.ENSP00000222543,9606.ENSP00000285379,9606.ENSP00000288840,9606.ENSP00000330696,9606.ENSP00000376436	TFPI2,CA2,SMAD6,P2RX7,ETS1	4.86e-05	0.00062	response to fluid shear stress
Process	GO.0032269	25	1014	9606	9606.ENSP00000161559,9606.ENSP00000220809,9606.ENSP00000222543,9606.ENSP00000226574,9606.ENSP00000240100,9606.ENSP00000245907,9606.ENSP00000260356,9606.ENSP00000263341,9606.ENSP00000263464,9606.ENSP00000265598,9606.ENSP00000287814,9606.ENSP00000288840,9606.ENSP00000317891,9606.ENSP00000330696,9606.ENSP00000339328,9606.ENSP00000359504,9606.ENSP00000360296,9606.ENSP00000362179,9606.ENSP00000375907,…	CEACAM1,PLAT,TFPI2,NFKB1,DUSP4,C3,THBS1,IL1B,BIRC3,LAMP3,TIMP4,SMAD6,TNIP1,P2RX7,PLAUR,GBP1,PPAP2B,ZC3H12A,PID1,CD44,SERPINE2,TNFAIP8,FRY,CNKSR3,TNFAIP3	4.84e-05	0.00062	negative regulation of cellular protein metabolic process
Process	GO.0030593	6	59	9606	9606.ENSP00000006053,9606.ENSP00000225831,9606.ENSP00000226317,9606.ENSP00000263341,9606.ENSP00000296026,9606.ENSP00000351671	CX3CL1,CCL2,CXCL6,IL1B,CXCL3,CCL20	4.87e-05	0.00062	neutrophil chemotaxis
Process	GO.0002695	9	157	9606	9606.ENSP00000161559,9606.ENSP00000242208,9606.ENSP00000245414,9606.ENSP00000296861,9606.ENSP00000362179,9606.ENSP00000391676,9606.ENSP00000392025,9606.ENSP00000454071,9606.ENSP00000481570	CEACAM1,INHBA,IRF1,TNFRSF21,ZC3H12A,JAK3,CYLD,LDLR,TNFAIP3	4.82e-05	0.00062	negative regulation of leukocyte activation
Process	GO.0043312	16	485	9606	9606.ENSP00000161559,9606.ENSP00000226574,9606.ENSP00000243347,9606.ENSP00000245907,9606.ENSP00000246006,9606.ENSP00000260010,9606.ENSP00000295927,9606.ENSP00000334928,9606.ENSP00000339328,9606.ENSP00000357981,9606.ENSP00000361850,9606.ENSP00000369055,9606.ENSP00000369129,9606.ENSP00000379110,9606.ENSP00000398632,9606.ENSP00000453302	CEACAM1,NFKB1,TNFAIP6,C3,CD93,TLR2,PTX3,PTPRB,PLAUR,CTSS,PLAU,B4GALT1,DSP,CXCL1,CD44,ADAM8	5.04e-05	0.00064	neutrophil degranulation
Process	GO.0031401	27	1149	9606	9606.ENSP00000006053,9606.ENSP00000220751,9606.ENSP00000225474,9606.ENSP00000225831,9606.ENSP00000228534,9606.ENSP00000242208,9606.ENSP00000245907,9606.ENSP00000252809,9606.ENSP00000256458,9606.ENSP00000260356,9606.ENSP00000263341,9606.ENSP00000263464,9606.ENSP00000263923,9606.ENSP00000264832,9606.ENSP00000265362,9606.ENSP00000267569,9606.ENSP00000313391,9606.ENSP00000317891,9606.ENSP00000330696,…	CX3CL1,RIPK2,CSF3,CCL2,IL23A,INHBA,C3,GDF15,IRAK2,THBS1,IL1B,BIRC3,KDR,ICAM1,SEMA3A,JDP2,DAB2,TNIP1,P2RX7,PLAUR,CCL20,ZC3H12A,IL24,IL6,CD44,PDGFC,ADAM8	5.27e-05	0.00067	positive regulation of protein modification process
Process	GO.0022408	9	159	9606	9606.ENSP00000161559,9606.ENSP00000245414,9606.ENSP00000254958,9606.ENSP00000259206,9606.ENSP00000296861,9606.ENSP00000362179,9606.ENSP00000391676,9606.ENSP00000392025,9606.ENSP00000415786	CEACAM1,IRF1,JAG1,IL1RN,TNFRSF21,ZC3H12A,JAK3,CYLD,SERPINE2	5.29e-05	0.00067	negative regulation of cell-cell adhesion
Process	GO.0001666	12	288	9606	9606.ENSP00000220809,9606.ENSP00000260010,9606.ENSP00000260356,9606.ENSP00000264832,9606.ENSP00000265087,9606.ENSP00000294728,9606.ENSP00000296585,9606.ENSP00000314897,9606.ENSP00000344479,9606.ENSP00000361850,9606.ENSP00000376436,9606.ENSP00000453302	PLAT,TLR2,THBS1,ICAM1,STC2,VCAM1,ITGA2,ANGPT2,NR4A2,PLAU,ETS1,ADAM8	5.53e-05	0.0007	response to hypoxia
Process	GO.0031328	37	1846	9606	9606.ENSP00000216797,9606.ENSP00000220751,9606.ENSP00000221452,9606.ENSP00000222553,9606.ENSP00000225474,9606.ENSP00000226574,9606.ENSP00000228534,9606.ENSP00000242208,9606.ENSP00000245414,9606.ENSP00000254958,9606.ENSP00000260010,9606.ENSP00000260356,9606.ENSP00000263339,9606.ENSP00000263341,9606.ENSP00000264832,9606.ENSP00000288840,9606.ENSP00000295927,9606.ENSP00000296585,9606.ENSP00000297316,…	NFKBIA,RIPK2,RELB,NAMPT,CSF3,NFKB1,IL23A,INHBA,IRF1,JAG1,TLR2,THBS1,IL1A,IL1B,ICAM1,SMAD6,PTX3,ITGA2,SOX17,DAB2,TNIP1,P2RX7,ZBTB16,NR4A2,CCL20,E2F2,NFKB2,NFIA,ZC3H12A,DDX58,MSX1,PID1,ETS1,IL6,POU2F2,HMGA2,LDLR	5.67e-05	0.00071	positive regulation of cellular biosynthetic process
Process	GO.0046637	6	61	9606	9606.ENSP00000220751,9606.ENSP00000228534,9606.ENSP00000325663,9606.ENSP00000338157,9606.ENSP00000362179,9606.ENSP00000391676	RIPK2,IL23A,NFKBIZ,ZBTB16,ZC3H12A,JAK3	5.79e-05	0.00072	regulation of alpha-beta T cell differentiation
Process	GO.0010035	16	491	9606	9606.ENSP00000245185,9606.ENSP00000260356,9606.ENSP00000263339,9606.ENSP00000263923,9606.ENSP00000264832,9606.ENSP00000285379,9606.ENSP00000294728,9606.ENSP00000295522,9606.ENSP00000322706,9606.ENSP00000330696,9606.ENSP00000362179,9606.ENSP00000376436,9606.ENSP00000384212,9606.ENSP00000385675,9606.ENSP00000446252,9606.ENSP00000481570	MT2A,THBS1,IL1A,KDR,ICAM1,CA2,VCAM1,CLDN1,HMGCS1,P2RX7,ZC3H12A,ETS1,IL18BP,IL6,SOD2,TNFAIP3	5.8e-05	0.00072	response to inorganic substance
Process	GO.0043062	13	339	9606	9606.ENSP00000260356,9606.ENSP00000261292,9606.ENSP00000263923,9606.ENSP00000264144,9606.ENSP00000264832,9606.ENSP00000284322,9606.ENSP00000294728,9606.ENSP00000296585,9606.ENSP00000357981,9606.ENSP00000358983,9606.ENSP00000369055,9606.ENSP00000398632,9606.ENSP00000453302	THBS1,LIPG,KDR,LAMC2,ICAM1,ABI3BP,VCAM1,ITGA2,CTSS,NFKB2,B4GALT1,CD44,ADAM8	6.13e-05	0.00076	extracellular structure organization
Process	GO.0042102	7	92	9606	9606.ENSP00000220751,9606.ENSP00000228534,9606.ENSP00000263341,9606.ENSP00000294728,9606.ENSP00000365048,9606.ENSP00000385675,9606.ENSP00000391676	RIPK2,IL23A,IL1B,VCAM1,TNFSF13B,IL6,JAK3	6.43e-05	0.0008	positive regulation of T cell proliferation
Process	GO.0045124	5	38	9606	9606.ENSP00000285379,9606.ENSP00000330696,9606.ENSP00000385675,9606.ENSP00000453302,9606.ENSP00000481570	CA2,P2RX7,IL6,ADAM8,TNFAIP3	6.94e-05	0.00086	regulation of bone resorption
Process	GO.0030198	12	296	9606	9606.ENSP00000260356,9606.ENSP00000263923,9606.ENSP00000264144,9606.ENSP00000264832,9606.ENSP00000284322,9606.ENSP00000294728,9606.ENSP00000296585,9606.ENSP00000357981,9606.ENSP00000358983,9606.ENSP00000369055,9606.ENSP00000398632,9606.ENSP00000453302	THBS1,KDR,LAMC2,ICAM1,ABI3BP,VCAM1,ITGA2,CTSS,NFKB2,B4GALT1,CD44,ADAM8	7.11e-05	0.00088	extracellular matrix organization
Process	GO.0006959	11	252	9606	9606.ENSP00000225831,9606.ENSP00000226317,9606.ENSP00000245907,9606.ENSP00000296026,9606.ENSP00000296861,9606.ENSP00000351671,9606.ENSP00000379110,9606.ENSP00000385675,9606.ENSP00000427279,9606.ENSP00000431603,9606.ENSP00000438615	CCL2,CXCL6,C3,CXCL3,TNFRSF21,CCL20,CXCL1,IL6,CXCL2,POU2F2,C1R	7.61e-05	0.00093	humoral immune response
Process	GO.0009725	22	854	9606	9606.ENSP00000161559,9606.ENSP00000226574,9606.ENSP00000241261,9606.ENSP00000242208,9606.ENSP00000259206,9606.ENSP00000260010,9606.ENSP00000260356,9606.ENSP00000264832,9606.ENSP00000265087,9606.ENSP00000285379,9606.ENSP00000287814,9606.ENSP00000295522,9606.ENSP00000296585,9606.ENSP00000322706,9606.ENSP00000344479,9606.ENSP00000357981,9606.ENSP00000375907,9606.ENSP00000376436,9606.ENSP00000376943,…	CEACAM1,NFKB1,TNFSF10,INHBA,IL1RN,TLR2,THBS1,ICAM1,STC2,CA2,TIMP4,CLDN1,ITGA2,HMGCS1,NR4A2,CTSS,PID1,ETS1,BCL2L11,IL6,JAK3,HDAC9	7.64e-05	0.00094	response to hormone
Process	GO.0050691	5	39	9606	9606.ENSP00000228534,9606.ENSP00000263341,9606.ENSP00000362179,9606.ENSP00000369213,9606.ENSP00000481570	IL23A,IL1B,ZC3H12A,DDX58,TNFAIP3	7.77e-05	0.00095	regulation of defense response to virus by host
Process	GO.0010632	10	209	9606	9606.ENSP00000161559,9606.ENSP00000260356,9606.ENSP00000263923,9606.ENSP00000265362,9606.ENSP00000296585,9606.ENSP00000314897,9606.ENSP00000360296,9606.ENSP00000362179,9606.ENSP00000376436,9606.ENSP00000408617	CEACAM1,THBS1,KDR,SEMA3A,ITGA2,ANGPT2,PPAP2B,ZC3H12A,ETS1,HDAC9	7.85e-05	0.00095	regulation of epithelial cell migration
Process	GO.0060337	6	65	9606	9606.ENSP00000245414,9606.ENSP00000257570,9606.ENSP00000359497,9606.ENSP00000360883,9606.ENSP00000360891,9606.ENSP00000395590	IRF1,OASL,GBP2,IFIT3,IFIT2,IFI35	8.03e-05	0.00097	type I interferon signaling pathway
Process	GO.0030595	8	130	9606	9606.ENSP00000006053,9606.ENSP00000225831,9606.ENSP00000226317,9606.ENSP00000263341,9606.ENSP00000296026,9606.ENSP00000351671,9606.ENSP00000385675,9606.ENSP00000453302	CX3CL1,CCL2,CXCL6,IL1B,CXCL3,CCL20,IL6,ADAM8	7.96e-05	0.00097	leukocyte chemotaxis
Process	GO.0008283	19	676	9606	9606.ENSP00000161559,9606.ENSP00000220751,9606.ENSP00000228280,9606.ENSP00000228534,9606.ENSP00000261292,9606.ENSP00000263339,9606.ENSP00000265074,9606.ENSP00000296575,9606.ENSP00000296585,9606.ENSP00000311697,9606.ENSP00000313391,9606.ENSP00000330696,9606.ENSP00000356357,9606.ENSP00000356782,9606.ENSP00000365048,9606.ENSP00000371233,9606.ENSP00000372170,9606.ENSP00000379110,9606.ENSP00000437621	CEACAM1,RIPK2,KITLG,IL23A,LIPG,IL1A,NPR3,HHIP,ITGA2,FGF5,DAB2,P2RX7,LHX9,BLZF1,TNFSF13B,SDCBP2,MSX1,CXCL1,HMGA2	8.08e-05	0.00097	cell population proliferation
Process	GO.0001660	3	6	9606	9606.ENSP00000259206,9606.ENSP00000263339,9606.ENSP00000263341	IL1RN,IL1A,IL1B	8.08e-05	0.00097	fever generation
Process	GO.0061045	6	66	9606	9606.ENSP00000161559,9606.ENSP00000220809,9606.ENSP00000339328,9606.ENSP00000361850,9606.ENSP00000405405,9606.ENSP00000415786	CEACAM1,PLAT,PLAUR,PLAU,PHLDB2,SERPINE2	8.69e-05	0.001	negative regulation of wound healing
Process	GO.0001776	6	66	9606	9606.ENSP00000330696,9606.ENSP00000365048,9606.ENSP00000376943,9606.ENSP00000385675,9606.ENSP00000391676,9606.ENSP00000481570	P2RX7,TNFSF13B,BCL2L11,IL6,JAK3,TNFAIP3	8.69e-05	0.001	leukocyte homeostasis
Process	GO.2001235	9	171	9606	9606.ENSP00000241261,9606.ENSP00000242208,9606.ENSP00000260356,9606.ENSP00000339328,9606.ENSP00000346697,9606.ENSP00000355996,9606.ENSP00000372170,9606.ENSP00000376943,9606.ENSP00000392025	TNFSF10,INHBA,THBS1,PLAUR,BMF,G0S2,MSX1,BCL2L11,CYLD	9e-05	0.0011	positive regulation of apoptotic signaling pathway
Process	GO.0070663	10	213	9606	9606.ENSP00000220751,9606.ENSP00000228534,9606.ENSP00000245414,9606.ENSP00000263341,9606.ENSP00000294728,9606.ENSP00000296861,9606.ENSP00000365048,9606.ENSP00000385675,9606.ENSP00000391676,9606.ENSP00000481570	RIPK2,IL23A,IRF1,IL1B,VCAM1,TNFRSF21,TNFSF13B,IL6,JAK3,TNFAIP3	9.12e-05	0.0011	regulation of leukocyte proliferation
Process	GO.0045596	19	683	9606	9606.ENSP00000161559,9606.ENSP00000216797,9606.ENSP00000242208,9606.ENSP00000245414,9606.ENSP00000254958,9606.ENSP00000265362,9606.ENSP00000267569,9606.ENSP00000288840,9606.ENSP00000297316,9606.ENSP00000338157,9606.ENSP00000357909,9606.ENSP00000359504,9606.ENSP00000362179,9606.ENSP00000365280,9606.ENSP00000372170,9606.ENSP00000385675,9606.ENSP00000391676,9606.ENSP00000392025,9606.ENSP00000454071	CEACAM1,NFKBIA,INHBA,IRF1,JAG1,SEMA3A,JDP2,SMAD6,SOX17,ZBTB16,SEMA6C,GBP1,ZC3H12A,ID1,MSX1,IL6,JAK3,CYLD,LDLR	9.22e-05	0.0011	negative regulation of cell differentiation
Process	GO.0032760	6	67	9606	9606.ENSP00000220751,9606.ENSP00000228534,9606.ENSP00000260010,9606.ENSP00000260356,9606.ENSP00000263642,9606.ENSP00000369213	RIPK2,IL23A,TLR2,THBS1,IFIH1,DDX58	9.39e-05	0.0011	positive regulation of tumor necrosis factor production
Process	GO.0030162	20	742	9606	9606.ENSP00000220751,9606.ENSP00000220809,9606.ENSP00000222543,9606.ENSP00000241261,9606.ENSP00000245907,9606.ENSP00000260356,9606.ENSP00000263341,9606.ENSP00000263464,9606.ENSP00000265598,9606.ENSP00000287814,9606.ENSP00000313391,9606.ENSP00000317891,9606.ENSP00000339328,9606.ENSP00000362179,9606.ENSP00000376943,9606.ENSP00000398632,9606.ENSP00000415786,9606.ENSP00000427424,9606.ENSP00000438615,…	RIPK2,PLAT,TFPI2,TNFSF10,C3,THBS1,IL1B,BIRC3,LAMP3,TIMP4,DAB2,TNIP1,PLAUR,ZC3H12A,BCL2L11,CD44,SERPINE2,TNFAIP8,C1R,ADAM8	9.11e-05	0.0011	regulation of proteolysis
Process	GO.0051250	8	135	9606	9606.ENSP00000161559,9606.ENSP00000242208,9606.ENSP00000245414,9606.ENSP00000296861,9606.ENSP00000362179,9606.ENSP00000391676,9606.ENSP00000392025,9606.ENSP00000481570	CEACAM1,INHBA,IRF1,TNFRSF21,ZC3H12A,JAK3,CYLD,TNFAIP3	0.0001	0.0012	negative regulation of lymphocyte activation
Process	GO.0050764	6	69	9606	9606.ENSP00000225831,9606.ENSP00000245907,9606.ENSP00000260010,9606.ENSP00000263341,9606.ENSP00000295927,9606.ENSP00000296585	CCL2,C3,TLR2,IL1B,PTX3,ITGA2	0.00011	0.0012	regulation of phagocytosis
Process	GO.0046649	13	358	9606	9606.ENSP00000220751,9606.ENSP00000221452,9606.ENSP00000228534,9606.ENSP00000245414,9606.ENSP00000264832,9606.ENSP00000294728,9606.ENSP00000299663,9606.ENSP00000330696,9606.ENSP00000385675,9606.ENSP00000391676,9606.ENSP00000392025,9606.ENSP00000408617,9606.ENSP00000431603	RIPK2,RELB,IL23A,IRF1,ICAM1,VCAM1,CLEC4E,P2RX7,IL6,JAK3,CYLD,HDAC9,POU2F2	0.0001	0.0012	lymphocyte activation
Process	GO.0016032	17	571	9606	9606.ENSP00000005257,9606.ENSP00000216797,9606.ENSP00000225831,9606.ENSP00000246006,9606.ENSP00000251642,9606.ENSP00000263642,9606.ENSP00000263923,9606.ENSP00000264832,9606.ENSP00000294728,9606.ENSP00000295522,9606.ENSP00000296585,9606.ENSP00000360231,9606.ENSP00000362179,9606.ENSP00000369213,9606.ENSP00000369299,9606.ENSP00000376943,9606.ENSP00000454071	RALA,NFKBIA,CCL2,CD93,DHX58,IFIH1,KDR,ICAM1,VCAM1,CLDN1,ITGA2,NFIA,ZC3H12A,DDX58,TRIM22,BCL2L11,LDLR	9.95e-05	0.0012	viral process
Process	GO.0010883	5	42	9606	9606.ENSP00000216797,9606.ENSP00000226574,9606.ENSP00000245907,9606.ENSP00000362179,9606.ENSP00000385675	NFKBIA,NFKB1,C3,ZC3H12A,IL6	0.00011	0.0012	regulation of lipid storage
Process	GO.0010557	35	1758	9606	9606.ENSP00000216797,9606.ENSP00000220751,9606.ENSP00000221452,9606.ENSP00000222553,9606.ENSP00000225474,9606.ENSP00000225831,9606.ENSP00000226574,9606.ENSP00000228534,9606.ENSP00000242208,9606.ENSP00000245414,9606.ENSP00000254958,9606.ENSP00000260010,9606.ENSP00000260356,9606.ENSP00000263339,9606.ENSP00000263341,9606.ENSP00000263923,9606.ENSP00000288840,9606.ENSP00000296585,9606.ENSP00000297316,…	NFKBIA,RIPK2,RELB,NAMPT,CSF3,CCL2,NFKB1,IL23A,INHBA,IRF1,JAG1,TLR2,THBS1,IL1A,IL1B,KDR,SMAD6,ITGA2,SOX17,DAB2,TNIP1,ZBTB16,NR4A2,CCL20,E2F2,NFKB2,NFIA,ZC3H12A,DDX58,MSX1,PID1,ETS1,IL6,POU2F2,HMGA2	0.00011	0.0012	positive regulation of macromolecule biosynthetic process
Process	GO.0032652	6	70	9606	9606.ENSP00000161559,9606.ENSP00000220751,9606.ENSP00000330696,9606.ENSP00000351671,9606.ENSP00000362179,9606.ENSP00000481570	CEACAM1,RIPK2,P2RX7,CCL20,ZC3H12A,TNFAIP3	0.00012	0.0013	regulation of interleukin-1 production
Process	GO.0098609	14	416	9606	9606.ENSP00000161559,9606.ENSP00000246006,9606.ENSP00000263341,9606.ENSP00000264832,9606.ENSP00000294728,9606.ENSP00000295522,9606.ENSP00000317891,9606.ENSP00000326888,9606.ENSP00000331736,9606.ENSP00000360296,9606.ENSP00000369129,9606.ENSP00000382090,9606.ENSP00000398632,9606.ENSP00000453302	CEACAM1,CD93,IL1B,ICAM1,VCAM1,CLDN1,TNIP1,LIMS2,SELE,PPAP2B,DSP,CLDN14,CD44,ADAM8	0.00012	0.0014	cell-cell adhesion
Process	GO.0097529	7	103	9606	9606.ENSP00000006053,9606.ENSP00000225831,9606.ENSP00000226317,9606.ENSP00000263341,9606.ENSP00000296026,9606.ENSP00000351671,9606.ENSP00000385675	CX3CL1,CCL2,CXCL6,IL1B,CXCL3,CCL20,IL6	0.00013	0.0014	myeloid leukocyte migration
Process	GO.2001237	7	104	9606	9606.ENSP00000006053,9606.ENSP00000241261,9606.ENSP00000260356,9606.ENSP00000263339,9606.ENSP00000263341,9606.ENSP00000264832,9606.ENSP00000481570	CX3CL1,TNFSF10,THBS1,IL1A,IL1B,ICAM1,TNFAIP3	0.00013	0.0015	negative regulation of extrinsic apoptotic signaling pathway
Process	GO.0044093	34	1713	9606	9606.ENSP00000006053,9606.ENSP00000220751,9606.ENSP00000225474,9606.ENSP00000225831,9606.ENSP00000226574,9606.ENSP00000228534,9606.ENSP00000241261,9606.ENSP00000252809,9606.ENSP00000256458,9606.ENSP00000260010,9606.ENSP00000260356,9606.ENSP00000263341,9606.ENSP00000264832,9606.ENSP00000265074,9606.ENSP00000296585,9606.ENSP00000330696,9606.ENSP00000331736,9606.ENSP00000339328,9606.ENSP00000344479,…	CX3CL1,RIPK2,CSF3,CCL2,NFKB1,IL23A,TNFSF10,GDF15,IRAK2,TLR2,THBS1,IL1B,ICAM1,NPR3,ITGA2,P2RX7,SELE,PLAUR,NR4A2,CCL20,CTSS,NFKB2,PPAP2B,TRAF1,DDX58,TRIM22,BCL2L11,CXCL1,IL6,DOCK4,GCH1,PDGFC,HMGA2,ADAM8	0.00014	0.0016	positive regulation of molecular function
Process	GO.0035821	9	182	9606	9606.ENSP00000295927,9606.ENSP00000296026,9606.ENSP00000317891,9606.ENSP00000351671,9606.ENSP00000362179,9606.ENSP00000376943,9606.ENSP00000379110,9606.ENSP00000427279,9606.ENSP00000437621	PTX3,CXCL3,TNIP1,CCL20,ZC3H12A,BCL2L11,CXCL1,CXCL2,HMGA2	0.00014	0.0016	modification of morphology or physiology of other organism
Process	GO.0006953	5	45	9606	9606.ENSP00000259206,9606.ENSP00000263339,9606.ENSP00000263341,9606.ENSP00000385675,9606.ENSP00000436126	IL1RN,IL1A,IL1B,IL6,SAA2	0.00014	0.0016	acute-phase response
Process	GO.0045893	30	1435	9606	9606.ENSP00000216797,9606.ENSP00000220751,9606.ENSP00000221452,9606.ENSP00000222553,9606.ENSP00000225474,9606.ENSP00000226574,9606.ENSP00000228534,9606.ENSP00000242208,9606.ENSP00000245414,9606.ENSP00000254958,9606.ENSP00000260010,9606.ENSP00000263339,9606.ENSP00000263341,9606.ENSP00000288840,9606.ENSP00000297316,9606.ENSP00000313391,9606.ENSP00000317891,9606.ENSP00000338157,9606.ENSP00000344479,…	NFKBIA,RIPK2,RELB,NAMPT,CSF3,NFKB1,IL23A,INHBA,IRF1,JAG1,TLR2,IL1A,IL1B,SMAD6,SOX17,DAB2,TNIP1,ZBTB16,NR4A2,E2F2,NFKB2,NFIA,ZC3H12A,DDX58,MSX1,PID1,ETS1,IL6,POU2F2,HMGA2	0.00016	0.0017	positive regulation of transcription, DNA-templated
Process	GO.2000351	5	46	9606	9606.ENSP00000225831,9606.ENSP00000260356,9606.ENSP00000263923,9606.ENSP00000264832,9606.ENSP00000481570	CCL2,THBS1,KDR,ICAM1,TNFAIP3	0.00016	0.0018	regulation of endothelial cell apoptotic process
Process	GO.0030100	10	229	9606	9606.ENSP00000225831,9606.ENSP00000245907,9606.ENSP00000260010,9606.ENSP00000263341,9606.ENSP00000295927,9606.ENSP00000296585,9606.ENSP00000313391,9606.ENSP00000331736,9606.ENSP00000360076,9606.ENSP00000454071	CCL2,C3,TLR2,IL1B,PTX3,ITGA2,DAB2,SELE,SGIP1,LDLR	0.00016	0.0018	regulation of endocytosis
Process	GO.0050766	5	47	9606	9606.ENSP00000225831,9606.ENSP00000245907,9606.ENSP00000263341,9606.ENSP00000295927,9606.ENSP00000296585	CCL2,C3,IL1B,PTX3,ITGA2	0.00017	0.0019	positive regulation of phagocytosis
Process	GO.1903707	8	148	9606	9606.ENSP00000161559,9606.ENSP00000216797,9606.ENSP00000242208,9606.ENSP00000245414,9606.ENSP00000338157,9606.ENSP00000362179,9606.ENSP00000391676,9606.ENSP00000392025	CEACAM1,NFKBIA,INHBA,IRF1,ZBTB16,ZC3H12A,JAK3,CYLD	0.00019	0.002	negative regulation of hemopoiesis
Process	GO.0071495	25	1106	9606	9606.ENSP00000161559,9606.ENSP00000220751,9606.ENSP00000225831,9606.ENSP00000226574,9606.ENSP00000242208,9606.ENSP00000252809,9606.ENSP00000264832,9606.ENSP00000285379,9606.ENSP00000288840,9606.ENSP00000295522,9606.ENSP00000296585,9606.ENSP00000311697,9606.ENSP00000322706,9606.ENSP00000330696,9606.ENSP00000344479,9606.ENSP00000353362,9606.ENSP00000357981,9606.ENSP00000365280,9606.ENSP00000372170,…	CEACAM1,RIPK2,CCL2,NFKB1,INHBA,GDF15,ICAM1,CA2,SMAD6,CLDN1,ITGA2,FGF5,HMGCS1,P2RX7,NR4A2,CACNA1A,CTSS,ID1,MSX1,PID1,BCL2L11,JAK3,CD44,HDAC9,PDGFC	0.00018	0.002	cellular response to endogenous stimulus
Process	GO.0030195	5	48	9606	9606.ENSP00000161559,9606.ENSP00000220809,9606.ENSP00000339328,9606.ENSP00000361850,9606.ENSP00000415786	CEACAM1,PLAT,PLAUR,PLAU,SERPINE2	0.00019	0.0021	negative regulation of blood coagulation
Process	GO.0030193	6	77	9606	9606.ENSP00000161559,9606.ENSP00000220809,9606.ENSP00000260356,9606.ENSP00000339328,9606.ENSP00000361850,9606.ENSP00000415786	CEACAM1,PLAT,THBS1,PLAUR,PLAU,SERPINE2	0.00019	0.0021	regulation of blood coagulation
Process	GO.1904035	6	78	9606	9606.ENSP00000225831,9606.ENSP00000260356,9606.ENSP00000263923,9606.ENSP00000264832,9606.ENSP00000385675,9606.ENSP00000481570	CCL2,THBS1,KDR,ICAM1,IL6,TNFAIP3	0.0002	0.0022	regulation of epithelial cell apoptotic process
Process	GO.0045620	5	49	9606	9606.ENSP00000242208,9606.ENSP00000245414,9606.ENSP00000362179,9606.ENSP00000391676,9606.ENSP00000392025	INHBA,IRF1,ZC3H12A,JAK3,CYLD	0.00021	0.0022	negative regulation of lymphocyte differentiation
Process	GO.0045582	6	78	9606	9606.ENSP00000220751,9606.ENSP00000228534,9606.ENSP00000325663,9606.ENSP00000338157,9606.ENSP00000392025,9606.ENSP00000453302	RIPK2,IL23A,NFKBIZ,ZBTB16,CYLD,ADAM8	0.0002	0.0022	positive regulation of T cell differentiation
Process	GO.0010594	8	150	9606	9606.ENSP00000161559,9606.ENSP00000260356,9606.ENSP00000263923,9606.ENSP00000314897,9606.ENSP00000360296,9606.ENSP00000362179,9606.ENSP00000376436,9606.ENSP00000408617	CEACAM1,THBS1,KDR,ANGPT2,PPAP2B,ZC3H12A,ETS1,HDAC9	0.0002	0.0022	regulation of endothelial cell migration
Process	GO.0001959	8	151	9606	9606.ENSP00000220751,9606.ENSP00000256458,9606.ENSP00000259206,9606.ENSP00000263464,9606.ENSP00000362994,9606.ENSP00000385675,9606.ENSP00000392025,9606.ENSP00000481570	RIPK2,IRAK2,IL1RN,BIRC3,TRAF1,IL6,CYLD,TNFAIP3	0.00021	0.0022	regulation of cytokine-mediated signaling pathway
Process	GO.1903530	18	672	9606	9606.ENSP00000005257,9606.ENSP00000161559,9606.ENSP00000220751,9606.ENSP00000242208,9606.ENSP00000260010,9606.ENSP00000263339,9606.ENSP00000263341,9606.ENSP00000263642,9606.ENSP00000296861,9606.ENSP00000299663,9606.ENSP00000322775,9606.ENSP00000330696,9606.ENSP00000353362,9606.ENSP00000359504,9606.ENSP00000362179,9606.ENSP00000369213,9606.ENSP00000385675,9606.ENSP00000453302	RALA,CEACAM1,RIPK2,INHBA,TLR2,IL1A,IL1B,IFIH1,TNFRSF21,CLEC4E,RHBDF2,P2RX7,CACNA1A,GBP1,ZC3H12A,DDX58,IL6,ADAM8	0.00022	0.0023	regulation of secretion by cell
Process	GO.0002825	4	26	9606	9606.ENSP00000220751,9606.ENSP00000228534,9606.ENSP00000263341,9606.ENSP00000391676	RIPK2,IL23A,IL1B,JAK3	0.00022	0.0023	regulation of T-helper 1 type immune response
Process	GO.0002675	4	26	9606	9606.ENSP00000245907,9606.ENSP00000263341,9606.ENSP00000385675,9606.ENSP00000453302	C3,IL1B,IL6,ADAM8	0.00022	0.0023	positive regulation of acute inflammatory response
Process	GO.0097237	9	195	9606	9606.ENSP00000226574,9606.ENSP00000263923,9606.ENSP00000362179,9606.ENSP00000372170,9606.ENSP00000376436,9606.ENSP00000384212,9606.ENSP00000385675,9606.ENSP00000446252,9606.ENSP00000481570	NFKB1,KDR,ZC3H12A,MSX1,ETS1,IL18BP,IL6,SOD2,TNFAIP3	0.00023	0.0024	cellular response to toxic substance
Process	GO.0050714	10	240	9606	9606.ENSP00000220751,9606.ENSP00000260010,9606.ENSP00000263339,9606.ENSP00000263341,9606.ENSP00000263642,9606.ENSP00000299663,9606.ENSP00000330696,9606.ENSP00000369213,9606.ENSP00000385675,9606.ENSP00000453302	RIPK2,TLR2,IL1A,IL1B,IFIH1,CLEC4E,P2RX7,DDX58,IL6,ADAM8	0.00023	0.0024	positive regulation of protein secretion
Process	GO.2001238	5	51	9606	9606.ENSP00000241261,9606.ENSP00000242208,9606.ENSP00000260356,9606.ENSP00000355996,9606.ENSP00000392025	TNFSF10,INHBA,THBS1,G0S2,CYLD	0.00025	0.0026	positive regulation of extrinsic apoptotic signaling pathway
Process	GO.0052548	13	393	9606	9606.ENSP00000220751,9606.ENSP00000222543,9606.ENSP00000241261,9606.ENSP00000245907,9606.ENSP00000260356,9606.ENSP00000263464,9606.ENSP00000265598,9606.ENSP00000287814,9606.ENSP00000339328,9606.ENSP00000376943,9606.ENSP00000398632,9606.ENSP00000415786,9606.ENSP00000427424	RIPK2,TFPI2,TNFSF10,C3,THBS1,BIRC3,LAMP3,TIMP4,PLAUR,BCL2L11,CD44,SERPINE2,TNFAIP8	0.00025	0.0026	regulation of endopeptidase activity
Process	GO.0010951	10	242	9606	9606.ENSP00000222543,9606.ENSP00000245907,9606.ENSP00000260356,9606.ENSP00000263464,9606.ENSP00000265598,9606.ENSP00000287814,9606.ENSP00000339328,9606.ENSP00000398632,9606.ENSP00000415786,9606.ENSP00000427424	TFPI2,C3,THBS1,BIRC3,LAMP3,TIMP4,PLAUR,CD44,SERPINE2,TNFAIP8	0.00025	0.0026	negative regulation of endopeptidase activity
Process	GO.0002260	5	51	9606	9606.ENSP00000330696,9606.ENSP00000365048,9606.ENSP00000376943,9606.ENSP00000391676,9606.ENSP00000481570	P2RX7,TNFSF13B,BCL2L11,JAK3,TNFAIP3	0.00025	0.0026	lymphocyte homeostasis
Process	GO.0071407	15	505	9606	9606.ENSP00000216797,9606.ENSP00000225831,9606.ENSP00000226574,9606.ENSP00000242208,9606.ENSP00000263341,9606.ENSP00000263642,9606.ENSP00000264832,9606.ENSP00000296585,9606.ENSP00000322706,9606.ENSP00000330696,9606.ENSP00000344479,9606.ENSP00000362179,9606.ENSP00000365280,9606.ENSP00000369213,9606.ENSP00000376943	NFKBIA,CCL2,NFKB1,INHBA,IL1B,IFIH1,ICAM1,ITGA2,HMGCS1,P2RX7,NR4A2,ZC3H12A,ID1,DDX58,BCL2L11	0.00026	0.0027	cellular response to organic cyclic compound
Process	GO.0070673	3	10	9606	9606.ENSP00000220751,9606.ENSP00000295522,9606.ENSP00000384212	RIPK2,CLDN1,IL18BP	0.00027	0.0027	response to interleukin-18
Process	GO.0051051	14	450	9606	9606.ENSP00000161559,9606.ENSP00000226574,9606.ENSP00000242208,9606.ENSP00000260010,9606.ENSP00000260356,9606.ENSP00000263341,9606.ENSP00000264832,9606.ENSP00000296861,9606.ENSP00000299759,9606.ENSP00000322775,9606.ENSP00000359504,9606.ENSP00000362179,9606.ENSP00000375907,9606.ENSP00000415786	CEACAM1,NFKB1,INHBA,TLR2,THBS1,IL1B,ICAM1,TNFRSF21,RRAD,RHBDF2,GBP1,ZC3H12A,PID1,SERPINE2	0.00027	0.0027	negative regulation of transport
Process	GO.0043331	6	82	9606	9606.ENSP00000216797,9606.ENSP00000220751,9606.ENSP00000226574,9606.ENSP00000263642,9606.ENSP00000330696,9606.ENSP00000369213	NFKBIA,RIPK2,NFKB1,IFIH1,P2RX7,DDX58	0.00026	0.0027	response to dsRNA
Process	GO.0043433	8	157	9606	9606.ENSP00000216797,9606.ENSP00000256458,9606.ENSP00000256495,9606.ENSP00000275015,9606.ENSP00000362179,9606.ENSP00000365280,9606.ENSP00000392025,9606.ENSP00000481570	NFKBIA,IRAK2,BHLHE40,NFKBIE,ZC3H12A,ID1,CYLD,TNFAIP3	0.00027	0.0028	negative regulation of DNA-binding transcription factor activity
Process	GO.0031326	65	4266	9606	9606.ENSP00000161559,9606.ENSP00000216797,9606.ENSP00000220751,9606.ENSP00000221452,9606.ENSP00000222553,9606.ENSP00000225474,9606.ENSP00000226574,9606.ENSP00000228534,9606.ENSP00000242208,9606.ENSP00000245414,9606.ENSP00000245907,9606.ENSP00000252809,9606.ENSP00000254958,9606.ENSP00000256458,9606.ENSP00000256495,9606.ENSP00000256759,9606.ENSP00000260010,9606.ENSP00000260356,9606.ENSP00000263339,…	CEACAM1,NFKBIA,RIPK2,RELB,NAMPT,CSF3,NFKB1,IL23A,INHBA,IRF1,C3,GDF15,JAG1,IRAK2,BHLHE40,FST,TLR2,THBS1,IL1A,IL1B,ICAM1,STC2,JDP2,NFKBIE,SMAD6,BCL6B,PTX3,ITGA2,SOX17,DAB2,TNIP1,NFKBIZ,P2RX7,MXD4,ZBTB16,ETV7,NR4A2,CCL20,E2F2,LHX9,BLZF1,NFKB2,NFIA,PPAP2B,TSC22D3,ZC3H12A,TRAF1,ID1,DDX58,TRIM22,MSX1,PID1,ETS1,IL6,JAK3,CYLD,TSC22D1,KBTBD8,HDAC9,POU2F2,HMGA2,SOD2,ADAM8,LDLR,TNFAIP3	0.00028	0.0029	regulation of cellular biosynthetic process
Process	GO.0010468	68	4533	9606	9606.ENSP00000216797,9606.ENSP00000220751,9606.ENSP00000221452,9606.ENSP00000222553,9606.ENSP00000225474,9606.ENSP00000226574,9606.ENSP00000228534,9606.ENSP00000242208,9606.ENSP00000245414,9606.ENSP00000245907,9606.ENSP00000252809,9606.ENSP00000254958,9606.ENSP00000256458,9606.ENSP00000256495,9606.ENSP00000256759,9606.ENSP00000260010,9606.ENSP00000260356,9606.ENSP00000263339,9606.ENSP00000263341,…	NFKBIA,RIPK2,RELB,NAMPT,CSF3,NFKB1,IL23A,INHBA,IRF1,C3,GDF15,JAG1,IRAK2,BHLHE40,FST,TLR2,THBS1,IL1A,IL1B,BIRC3,KDR,ICAM1,STC2,LAMP3,JDP2,NFKBIE,SMAD6,BCL6B,ITGA2,SOX17,FGF5,DAB2,TNIP1,NFKBIZ,P2RX7,MXD4,ZBTB16,ETV7,NR4A2,WTAP,E2F2,LHX9,BLZF1,NFKB2,NFIA,PPAP2B,TSC22D3,ZC3H12A,TRAF1,ID1,DDX58,TRIM22,MSX1,PID1,ETS1,IL6,CYLD,TSC22D1,KBTBD8,HDAC9,SERPINE2,POU2F2,HMGA2,C1R,SOD2,ADAM8,LDLR,TNFAIP3	0.0003	0.003	regulation of gene expression
Process	GO.0045637	10	249	9606	9606.ENSP00000161559,9606.ENSP00000216797,9606.ENSP00000225474,9606.ENSP00000228534,9606.ENSP00000242208,9606.ENSP00000254958,9606.ENSP00000260356,9606.ENSP00000285379,9606.ENSP00000338157,9606.ENSP00000376436	CEACAM1,NFKBIA,CSF3,IL23A,INHBA,JAG1,THBS1,CA2,ZBTB16,ETS1	0.00031	0.0031	regulation of myeloid cell differentiation
Process	GO.0045055	18	691	9606	9606.ENSP00000161559,9606.ENSP00000226574,9606.ENSP00000243347,9606.ENSP00000245907,9606.ENSP00000246006,9606.ENSP00000260010,9606.ENSP00000260356,9606.ENSP00000295927,9606.ENSP00000330696,9606.ENSP00000334928,9606.ENSP00000339328,9606.ENSP00000357981,9606.ENSP00000361850,9606.ENSP00000369055,9606.ENSP00000369129,9606.ENSP00000379110,9606.ENSP00000398632,9606.ENSP00000453302	CEACAM1,NFKB1,TNFAIP6,C3,CD93,TLR2,THBS1,PTX3,P2RX7,PTPRB,PLAUR,CTSS,PLAU,B4GALT1,DSP,CXCL1,CD44,ADAM8	0.00031	0.0031	regulated exocytosis
Process	GO.1902532	15	514	9606	9606.ENSP00000240100,9606.ENSP00000251642,9606.ENSP00000260356,9606.ENSP00000263341,9606.ENSP00000317891,9606.ENSP00000330696,9606.ENSP00000339328,9606.ENSP00000359504,9606.ENSP00000362179,9606.ENSP00000392025,9606.ENSP00000398632,9606.ENSP00000415786,9606.ENSP00000446252,9606.ENSP00000475915,9606.ENSP00000481570	DUSP4,DHX58,THBS1,IL1B,TNIP1,P2RX7,PLAUR,GBP1,ZC3H12A,CYLD,CD44,SERPINE2,SOD2,CNKSR3,TNFAIP3	0.00032	0.0032	negative regulation of intracellular signal transduction
Process	GO.0090200	4	29	9606	9606.ENSP00000241261,9606.ENSP00000339328,9606.ENSP00000346697,9606.ENSP00000376943	TNFSF10,PLAUR,BMF,BCL2L11	0.00032	0.0032	positive regulation of release of cytochrome c from mitochondria
Process	GO.0071223	3	11	9606	9606.ENSP00000220751,9606.ENSP00000260010,9606.ENSP00000351671	RIPK2,TLR2,CCL20	0.00034	0.0033	cellular response to lipoteichoic acid
Process	GO.0048869	56	3533	9606	9606.ENSP00000006053,9606.ENSP00000221452,9606.ENSP00000225474,9606.ENSP00000225831,9606.ENSP00000242208,9606.ENSP00000245414,9606.ENSP00000252809,9606.ENSP00000254958,9606.ENSP00000256759,9606.ENSP00000260010,9606.ENSP00000263339,9606.ENSP00000263341,9606.ENSP00000263923,9606.ENSP00000264346,9606.ENSP00000264832,9606.ENSP00000265361,9606.ENSP00000265362,9606.ENSP00000284136,9606.ENSP00000288840,…	CX3CL1,RELB,CSF3,CCL2,INHBA,IRF1,GDF15,JAG1,FST,TLR2,IL1A,IL1B,KDR,HERC6,ICAM1,SEMA3C,SEMA3A,SEMA3D,SMAD6,VCAM1,CLDN1,HHIP,ITGA2,TNFRSF21,SOX17,CLEC4E,FGF5,DAB2,ANGPT2,P2RX7,ZBTB16,NTN4,ETV7,NR4A2,LHX9,SEMA6C,NFKB2,ZC3H12A,ID1,NEBL,B4GALT1,DSP,MSX1,PID1,TYMP,IL6,JAK3,CYLD,KBTBD8,HDAC9,SERPINE2,POU2F2,HMGA2,FRY,ADAM8,LDLR	0.00034	0.0033	cellular developmental process
Process	GO.0010812	5	55	9606	9606.ENSP00000254958,9606.ENSP00000260356,9606.ENSP00000314897,9606.ENSP00000359504,9606.ENSP00000405405	JAG1,THBS1,ANGPT2,GBP1,PHLDB2	0.00034	0.0033	negative regulation of cell-substrate adhesion
Process	GO.0003158	6	86	9606	9606.ENSP00000254958,9606.ENSP00000263923,9606.ENSP00000264832,9606.ENSP00000295522,9606.ENSP00000297316,9606.ENSP00000365280	JAG1,KDR,ICAM1,CLDN1,SOX17,ID1	0.00034	0.0033	endothelium development
Process	GO.2000027	9	207	9606	9606.ENSP00000161559,9606.ENSP00000265361,9606.ENSP00000297316,9606.ENSP00000313391,9606.ENSP00000326888,9606.ENSP00000340998,9606.ENSP00000369055,9606.ENSP00000372170,9606.ENSP00000481570	CEACAM1,SEMA3C,SOX17,DAB2,LIMS2,NTN4,B4GALT1,MSX1,TNFAIP3	0.00035	0.0034	regulation of animal organ morphogenesis
Process	GO.0098586	4	30	9606	9606.ENSP00000263642,9606.ENSP00000362179,9606.ENSP00000369213,9606.ENSP00000376943	IFIH1,ZC3H12A,DDX58,BCL2L11	0.00036	0.0035	cellular response to virus
Process	GO.0071354	4	30	9606	9606.ENSP00000226574,9606.ENSP00000264832,9606.ENSP00000375907,9606.ENSP00000385675	NFKB1,ICAM1,PID1,IL6	0.00036	0.0035	cellular response to interleukin-6
Process	GO.0002224	6	87	9606	9606.ENSP00000216797,9606.ENSP00000220751,9606.ENSP00000256458,9606.ENSP00000260010,9606.ENSP00000317891,9606.ENSP00000357981	NFKBIA,RIPK2,IRAK2,TLR2,TNIP1,CTSS	0.00036	0.0035	toll-like receptor signaling pathway
Process	GO.0048729	15	522	9606	9606.ENSP00000005257,9606.ENSP00000161559,9606.ENSP00000242208,9606.ENSP00000254958,9606.ENSP00000265361,9606.ENSP00000265362,9606.ENSP00000285379,9606.ENSP00000296575,9606.ENSP00000296585,9606.ENSP00000297316,9606.ENSP00000369055,9606.ENSP00000369129,9606.ENSP00000372170,9606.ENSP00000398632,9606.ENSP00000437621	RALA,CEACAM1,INHBA,JAG1,SEMA3C,SEMA3A,CA2,HHIP,ITGA2,SOX17,B4GALT1,DSP,MSX1,CD44,HMGA2	0.00037	0.0036	tissue morphogenesis
Process	GO.0032722	5	56	9606	9606.ENSP00000220751,9606.ENSP00000260010,9606.ENSP00000263339,9606.ENSP00000263341,9606.ENSP00000385675	RIPK2,TLR2,IL1A,IL1B,IL6	0.00037	0.0036	positive regulation of chemokine production
Process	GO.0045639	6	89	9606	9606.ENSP00000225474,9606.ENSP00000228534,9606.ENSP00000242208,9606.ENSP00000254958,9606.ENSP00000285379,9606.ENSP00000376436	CSF3,IL23A,INHBA,JAG1,CA2,ETS1	0.0004	0.0038	positive regulation of myeloid cell differentiation
Process	GO.0048660	7	126	9606	9606.ENSP00000222553,9606.ENSP00000260356,9606.ENSP00000265074,9606.ENSP00000296585,9606.ENSP00000385675,9606.ENSP00000446252,9606.ENSP00000481570	NAMPT,THBS1,NPR3,ITGA2,IL6,SOD2,TNFAIP3	0.0004	0.0039	regulation of smooth muscle cell proliferation
Process	GO.0045601	4	31	9606	9606.ENSP00000161559,9606.ENSP00000254958,9606.ENSP00000263341,9606.ENSP00000365280	CEACAM1,JAG1,IL1B,ID1	0.00041	0.0039	regulation of endothelial cell differentiation
Process	GO.0044706	9	211	9606	9606.ENSP00000222553,9606.ENSP00000263341,9606.ENSP00000265087,9606.ENSP00000296585,9606.ENSP00000314897,9606.ENSP00000369055,9606.ENSP00000376436,9606.ENSP00000415786,9606.ENSP00000472546	NAMPT,IL1B,STC2,ITGA2,ANGPT2,B4GALT1,ETS1,SERPINE2,PLA2G4C	0.0004	0.0039	multi-multicellular organism process
Process	GO.0043122	8	167	9606	9606.ENSP00000220751,9606.ENSP00000241261,9606.ENSP00000263341,9606.ENSP00000263464,9606.ENSP00000317891,9606.ENSP00000362179,9606.ENSP00000369299,9606.ENSP00000481570	RIPK2,TNFSF10,IL1B,BIRC3,TNIP1,ZC3H12A,TRIM22,TNFAIP3	0.00041	0.0039	regulation of I-kappaB kinase/NF-kappaB signaling
Process	GO.0045779	3	12	9606	9606.ENSP00000330696,9606.ENSP00000385675,9606.ENSP00000481570	P2RX7,IL6,TNFAIP3	0.00042	0.004	negative regulation of bone resorption
Process	GO.0042108	5	58	9606	9606.ENSP00000245414,9606.ENSP00000260356,9606.ENSP00000263339,9606.ENSP00000263341,9606.ENSP00000351671	IRF1,THBS1,IL1A,IL1B,CCL20	0.00043	0.004	positive regulation of cytokine biosynthetic process
Process	GO.0006887	19	774	9606	9606.ENSP00000005257,9606.ENSP00000161559,9606.ENSP00000226574,9606.ENSP00000243347,9606.ENSP00000245907,9606.ENSP00000246006,9606.ENSP00000260010,9606.ENSP00000260356,9606.ENSP00000295927,9606.ENSP00000330696,9606.ENSP00000334928,9606.ENSP00000339328,9606.ENSP00000357981,9606.ENSP00000361850,9606.ENSP00000369055,9606.ENSP00000369129,9606.ENSP00000379110,9606.ENSP00000398632,9606.ENSP00000453302	RALA,CEACAM1,NFKB1,TNFAIP6,C3,CD93,TLR2,THBS1,PTX3,P2RX7,PTPRB,PLAUR,CTSS,PLAU,B4GALT1,DSP,CXCL1,CD44,ADAM8	0.00043	0.004	exocytosis
Process	GO.0002709	5	58	9606	9606.ENSP00000161559,9606.ENSP00000228534,9606.ENSP00000263341,9606.ENSP00000330696,9606.ENSP00000385675	CEACAM1,IL23A,IL1B,P2RX7,IL6	0.00043	0.004	regulation of T cell mediated immunity
Process	GO.0002523	3	12	9606	9606.ENSP00000006053,9606.ENSP00000331736,9606.ENSP00000453302	CX3CL1,SELE,ADAM8	0.00042	0.004	leukocyte migration involved in inflammatory response
Process	GO.0043154	6	91	9606	9606.ENSP00000260356,9606.ENSP00000263464,9606.ENSP00000265598,9606.ENSP00000339328,9606.ENSP00000398632,9606.ENSP00000427424	THBS1,BIRC3,LAMP3,PLAUR,CD44,TNFAIP8	0.00045	0.0042	negative regulation of cysteine-type endopeptidase activity involved in apoptotic process
Process	GO.0010574	4	32	9606	9606.ENSP00000245907,9606.ENSP00000263339,9606.ENSP00000263341,9606.ENSP00000385675	C3,IL1A,IL1B,IL6	0.00046	0.0042	regulation of vascular endothelial growth factor production
Process	GO.0002521	11	313	9606	9606.ENSP00000221452,9606.ENSP00000225474,9606.ENSP00000245414,9606.ENSP00000260010,9606.ENSP00000294728,9606.ENSP00000299663,9606.ENSP00000385675,9606.ENSP00000391676,9606.ENSP00000392025,9606.ENSP00000408617,9606.ENSP00000431603	RELB,CSF3,IRF1,TLR2,VCAM1,CLEC4E,IL6,JAK3,CYLD,HDAC9,POU2F2	0.00046	0.0043	leukocyte differentiation
Process	GO.2000345	3	13	9606	9606.ENSP00000161559,9606.ENSP00000326888,9606.ENSP00000481570	CEACAM1,LIMS2,TNFAIP3	0.00051	0.0046	regulation of hepatocyte proliferation
Process	GO.0097191	6	93	9606	9606.ENSP00000242208,9606.ENSP00000263339,9606.ENSP00000263341,9606.ENSP00000330696,9606.ENSP00000355996,9606.ENSP00000376943	INHBA,IL1A,IL1B,P2RX7,G0S2,BCL2L11	0.0005	0.0046	extrinsic apoptotic signaling pathway
Process	GO.0048863	7	131	9606	9606.ENSP00000254958,9606.ENSP00000265361,9606.ENSP00000265362,9606.ENSP00000297316,9606.ENSP00000372170,9606.ENSP00000401878,9606.ENSP00000437621	JAG1,SEMA3C,SEMA3A,SOX17,MSX1,KBTBD8,HMGA2	0.0005	0.0046	stem cell differentiation
Process	GO.0034105	4	33	9606	9606.ENSP00000228534,9606.ENSP00000285379,9606.ENSP00000369055,9606.ENSP00000453302	IL23A,CA2,B4GALT1,ADAM8	0.00051	0.0046	positive regulation of tissue remodeling
Process	GO.0030522	8	173	9606	9606.ENSP00000216797,9606.ENSP00000220751,9606.ENSP00000256458,9606.ENSP00000263642,9606.ENSP00000344479,9606.ENSP00000369213,9606.ENSP00000392025,9606.ENSP00000481570	NFKBIA,RIPK2,IRAK2,IFIH1,NR4A2,DDX58,CYLD,TNFAIP3	0.00051	0.0046	intracellular receptor signaling pathway
Process	GO.0006596	3	13	9606	9606.ENSP00000234111,9606.ENSP00000368572,9606.ENSP00000478305	ODC1,SAT1,SMOX	0.00051	0.0046	polyamine biosynthetic process
Process	GO.2000379	6	94	9606	9606.ENSP00000260356,9606.ENSP00000263341,9606.ENSP00000264832,9606.ENSP00000295927,9606.ENSP00000362179,9606.ENSP00000375907	THBS1,IL1B,ICAM1,PTX3,ZC3H12A,PID1	0.00053	0.0048	positive regulation of reactive oxygen species metabolic process
Process	GO.0072676	5	61	9606	9606.ENSP00000006053,9606.ENSP00000225831,9606.ENSP00000264832,9606.ENSP00000351671,9606.ENSP00000453302	CX3CL1,CCL2,ICAM1,CCL20,ADAM8	0.00053	0.0048	lymphocyte migration
Process	GO.0050878	14	483	9606	9606.ENSP00000161559,9606.ENSP00000220809,9606.ENSP00000222543,9606.ENSP00000245414,9606.ENSP00000260356,9606.ENSP00000265074,9606.ENSP00000295522,9606.ENSP00000296585,9606.ENSP00000330696,9606.ENSP00000339328,9606.ENSP00000361850,9606.ENSP00000385675,9606.ENSP00000415786,9606.ENSP00000422464	CEACAM1,PLAT,TFPI2,IRF1,THBS1,NPR3,CLDN1,ITGA2,P2RX7,PLAUR,PLAU,IL6,SERPINE2,PDGFC	0.00053	0.0048	regulation of body fluid levels
Process	GO.0008584	7	132	9606	9606.ENSP00000228280,9606.ENSP00000241261,9606.ENSP00000242208,9606.ENSP00000264832,9606.ENSP00000322706,9606.ENSP00000356357,9606.ENSP00000376943	KITLG,TNFSF10,INHBA,ICAM1,HMGCS1,LHX9,BCL2L11	0.00053	0.0048	male gonad development
Process	GO.0032735	4	34	9606	9606.ENSP00000220751,9606.ENSP00000228534,9606.ENSP00000245414,9606.ENSP00000260010	RIPK2,IL23A,IRF1,TLR2	0.00056	0.005	positive regulation of interleukin-12 production
Process	GO.0031638	4	34	9606	9606.ENSP00000220751,9606.ENSP00000220809,9606.ENSP00000361850,9606.ENSP00000438615	RIPK2,PLAT,PLAU,C1R	0.00056	0.005	zymogen activation
Process	GO.0009991	14	486	9606	9606.ENSP00000252809,9606.ENSP00000261292,9606.ENSP00000263341,9606.ENSP00000264832,9606.ENSP00000265087,9606.ENSP00000294728,9606.ENSP00000296585,9606.ENSP00000322706,9606.ENSP00000330696,9606.ENSP00000344479,9606.ENSP00000356125,9606.ENSP00000360076,9606.ENSP00000362179,9606.ENSP00000454071	GDF15,LIPG,IL1B,ICAM1,STC2,VCAM1,ITGA2,HMGCS1,P2RX7,NR4A2,NUAK2,SGIP1,ZC3H12A,LDLR	0.00057	0.005	response to extracellular stimulus
Process	GO.0010595	6	96	9606	9606.ENSP00000260356,9606.ENSP00000263923,9606.ENSP00000360296,9606.ENSP00000362179,9606.ENSP00000376436,9606.ENSP00000408617	THBS1,KDR,PPAP2B,ZC3H12A,ETS1,HDAC9	0.00058	0.0052	positive regulation of endothelial cell migration
Process	GO.0072683	2	2	9606	9606.ENSP00000225831,9606.ENSP00000264832	CCL2,ICAM1	0.0006	0.0053	T cell extravasation
Process	GO.0070427	2	2	9606	9606.ENSP00000216797,9606.ENSP00000220751	NFKBIA,RIPK2	0.0006	0.0053	nucleotide-binding oligomerization domain containing 1 signaling pathway
Process	GO.1902106	6	97	9606	9606.ENSP00000161559,9606.ENSP00000242208,9606.ENSP00000245414,9606.ENSP00000362179,9606.ENSP00000391676,9606.ENSP00000392025	CEACAM1,INHBA,IRF1,ZC3H12A,JAK3,CYLD	0.00061	0.0054	negative regulation of leukocyte differentiation
Process	GO.1901222	6	97	9606	9606.ENSP00000216797,9606.ENSP00000228534,9606.ENSP00000260010,9606.ENSP00000263341,9606.ENSP00000362179,9606.ENSP00000392025	NFKBIA,IL23A,TLR2,IL1B,ZC3H12A,CYLD	0.00061	0.0054	regulation of NIK/NF-kappaB signaling
Process	GO.0042110	9	225	9606	9606.ENSP00000220751,9606.ENSP00000221452,9606.ENSP00000228534,9606.ENSP00000245414,9606.ENSP00000264832,9606.ENSP00000299663,9606.ENSP00000330696,9606.ENSP00000385675,9606.ENSP00000392025	RIPK2,RELB,IL23A,IRF1,ICAM1,CLEC4E,P2RX7,IL6,CYLD	0.00063	0.0054	T cell activation
Process	GO.0038061	4	35	9606	9606.ENSP00000221452,9606.ENSP00000226574,9606.ENSP00000263464,9606.ENSP00000358983	RELB,NFKB1,BIRC3,NFKB2	0.00062	0.0054	NIK/NF-kappaB signaling
Process	GO.0032725	3	14	9606	9606.ENSP00000228534,9606.ENSP00000263341,9606.ENSP00000369213	IL23A,IL1B,DDX58	0.00062	0.0054	positive regulation of granulocyte macrophage colony-stimulating factor production
Process	GO.0014066	6	97	9606	9606.ENSP00000161559,9606.ENSP00000225474,9606.ENSP00000259874,9606.ENSP00000263923,9606.ENSP00000415786,9606.ENSP00000422464	CEACAM1,CSF3,IER3,KDR,SERPINE2,PDGFC	0.00061	0.0054	regulation of phosphatidylinositol 3-kinase signaling
Process	GO.0010634	7	136	9606	9606.ENSP00000260356,9606.ENSP00000263923,9606.ENSP00000296585,9606.ENSP00000360296,9606.ENSP00000362179,9606.ENSP00000376436,9606.ENSP00000408617	THBS1,KDR,ITGA2,PPAP2B,ZC3H12A,ETS1,HDAC9	0.00062	0.0054	positive regulation of epithelial cell migration
Process	GO.0006357	44	2633	9606	9606.ENSP00000216797,9606.ENSP00000220751,9606.ENSP00000221452,9606.ENSP00000222553,9606.ENSP00000225474,9606.ENSP00000226574,9606.ENSP00000228534,9606.ENSP00000242208,9606.ENSP00000245414,9606.ENSP00000252809,9606.ENSP00000254958,9606.ENSP00000256495,9606.ENSP00000256759,9606.ENSP00000260010,9606.ENSP00000263339,9606.ENSP00000263341,9606.ENSP00000267569,9606.ENSP00000288840,9606.ENSP00000293805,…	NFKBIA,RIPK2,RELB,NAMPT,CSF3,NFKB1,IL23A,INHBA,IRF1,GDF15,JAG1,BHLHE40,FST,TLR2,IL1A,IL1B,JDP2,SMAD6,BCL6B,SOX17,TNIP1,NFKBIZ,MXD4,ZBTB16,ETV7,NR4A2,E2F2,LHX9,BLZF1,NFKB2,NFIA,TSC22D3,ZC3H12A,ID1,DDX58,MSX1,PID1,ETS1,IL6,TSC22D1,HDAC9,POU2F2,HMGA2,SOD2	0.00061	0.0054	regulation of transcription by RNA polymerase II
Process	GO.0002693	3	14	9606	9606.ENSP00000263339,9606.ENSP00000264832,9606.ENSP00000453302	IL1A,ICAM1,ADAM8	0.00062	0.0054	positive regulation of cellular extravasation
Process	GO.1903670	5	64	9606	9606.ENSP00000161559,9606.ENSP00000260356,9606.ENSP00000263923,9606.ENSP00000355249,9606.ENSP00000408617	CEACAM1,THBS1,KDR,E2F2,HDAC9	0.00066	0.0056	regulation of sprouting angiogenesis
Process	GO.0031348	8	180	9606	9606.ENSP00000161559,9606.ENSP00000226574,9606.ENSP00000243347,9606.ENSP00000251642,9606.ENSP00000362179,9606.ENSP00000376436,9606.ENSP00000454071,9606.ENSP00000481570	CEACAM1,NFKB1,TNFAIP6,DHX58,ZC3H12A,ETS1,LDLR,TNFAIP3	0.00065	0.0056	negative regulation of defense response
Process	GO.0030098	9	226	9606	9606.ENSP00000221452,9606.ENSP00000245414,9606.ENSP00000294728,9606.ENSP00000299663,9606.ENSP00000385675,9606.ENSP00000391676,9606.ENSP00000392025,9606.ENSP00000408617,9606.ENSP00000431603	RELB,IRF1,VCAM1,CLEC4E,IL6,JAK3,CYLD,HDAC9,POU2F2	0.00065	0.0056	lymphocyte differentiation
Process	GO.1902107	7	139	9606	9606.ENSP00000220751,9606.ENSP00000228534,9606.ENSP00000285379,9606.ENSP00000325663,9606.ENSP00000338157,9606.ENSP00000392025,9606.ENSP00000453302	RIPK2,IL23A,CA2,NFKBIZ,ZBTB16,CYLD,ADAM8	0.0007	0.006	positive regulation of leukocyte differentiation
Process	GO.0060055	3	15	9606	9606.ENSP00000006053,9606.ENSP00000369055,9606.ENSP00000376436	CX3CL1,B4GALT1,ETS1	0.00073	0.0063	angiogenesis involved in wound healing
Process	GO.0050922	4	37	9606	9606.ENSP00000225831,9606.ENSP00000260356,9606.ENSP00000265362,9606.ENSP00000314897	CCL2,THBS1,SEMA3A,ANGPT2	0.00075	0.0064	negative regulation of chemotaxis
Process	GO.0032368	6	101	9606	9606.ENSP00000216797,9606.ENSP00000226574,9606.ENSP00000260356,9606.ENSP00000261292,9606.ENSP00000263341,9606.ENSP00000330696	NFKBIA,NFKB1,THBS1,LIPG,IL1B,P2RX7	0.00075	0.0064	regulation of lipid transport
Process	GO.0002711	4	37	9606	9606.ENSP00000228534,9606.ENSP00000263341,9606.ENSP00000330696,9606.ENSP00000385675	IL23A,IL1B,P2RX7,IL6	0.00075	0.0064	positive regulation of T cell mediated immunity
Process	GO.0002699	8	186	9606	9606.ENSP00000220751,9606.ENSP00000228534,9606.ENSP00000245907,9606.ENSP00000251642,9606.ENSP00000263341,9606.ENSP00000325663,9606.ENSP00000330696,9606.ENSP00000385675	RIPK2,IL23A,C3,DHX58,IL1B,NFKBIZ,P2RX7,IL6	0.0008	0.0068	positive regulation of immune effector process
Process	GO.0045926	9	235	9606	9606.ENSP00000242208,9606.ENSP00000245185,9606.ENSP00000252809,9606.ENSP00000265087,9606.ENSP00000265362,9606.ENSP00000297316,9606.ENSP00000357909,9606.ENSP00000372170,9606.ENSP00000415786	INHBA,MT2A,GDF15,STC2,SEMA3A,SOX17,SEMA6C,MSX1,SERPINE2	0.00085	0.0072	negative regulation of growth
Process	GO.0006970	5	68	9606	9606.ENSP00000221452,9606.ENSP00000262461,9606.ENSP00000295522,9606.ENSP00000296585,9606.ENSP00000361458	RELB,SLC12A2,CLDN1,ITGA2,TSC22D3	0.00085	0.0072	response to osmotic stress
Process	GO.0050868	6	104	9606	9606.ENSP00000161559,9606.ENSP00000245414,9606.ENSP00000296861,9606.ENSP00000362179,9606.ENSP00000391676,9606.ENSP00000392025	CEACAM1,IRF1,TNFRSF21,ZC3H12A,JAK3,CYLD	0.00087	0.0073	negative regulation of T cell activation
Process	GO.0032695	3	16	9606	9606.ENSP00000226574,9606.ENSP00000260356,9606.ENSP00000391676	NFKB1,THBS1,JAK3	0.00086	0.0073	negative regulation of interleukin-12 production
Process	GO.0030336	9	237	9606	9606.ENSP00000006053,9606.ENSP00000225831,9606.ENSP00000254958,9606.ENSP00000260356,9606.ENSP00000265362,9606.ENSP00000314897,9606.ENSP00000375795,9606.ENSP00000381007,9606.ENSP00000405405	CX3CL1,CCL2,JAG1,THBS1,SEMA3A,ANGPT2,IL24,NAV3,PHLDB2	0.0009	0.0074	negative regulation of cell migration
Process	GO.0010810	8	189	9606	9606.ENSP00000254958,9606.ENSP00000260356,9606.ENSP00000263923,9606.ENSP00000284322,9606.ENSP00000314897,9606.ENSP00000359504,9606.ENSP00000361850,9606.ENSP00000405405	JAG1,THBS1,KDR,ABI3BP,ANGPT2,GBP1,PLAU,PHLDB2	0.00088	0.0074	regulation of cell-substrate adhesion
Process	GO.0007399	38	2206	9606	9606.ENSP00000005257,9606.ENSP00000006053,9606.ENSP00000225831,9606.ENSP00000242208,9606.ENSP00000254958,9606.ENSP00000260010,9606.ENSP00000265361,9606.ENSP00000265362,9606.ENSP00000284136,9606.ENSP00000287814,9606.ENSP00000294728,9606.ENSP00000295522,9606.ENSP00000296575,9606.ENSP00000296861,9606.ENSP00000297316,9606.ENSP00000311697,9606.ENSP00000322706,9606.ENSP00000338157,9606.ENSP00000340998,…	RALA,CX3CL1,CCL2,INHBA,JAG1,TLR2,SEMA3C,SEMA3A,SEMA3D,TIMP4,VCAM1,CLDN1,HHIP,TNFRSF21,SOX17,FGF5,HMGCS1,ZBTB16,NTN4,RAPGEF5,NR4A2,HAPLN3,LHX9,SEMA6C,NFIA,ZC3H12A,ID1,SDCBP2,MSX1,ETS1,BCL2L11,CXCL1,IL6,HDAC9,SERPINE2,PDGFC,FRY,LDLR	0.00089	0.0074	nervous system development
Process	GO.0007596	10	288	9606	9606.ENSP00000220809,9606.ENSP00000222543,9606.ENSP00000245414,9606.ENSP00000296585,9606.ENSP00000330696,9606.ENSP00000339328,9606.ENSP00000361850,9606.ENSP00000385675,9606.ENSP00000415786,9606.ENSP00000422464	PLAT,TFPI2,IRF1,ITGA2,P2RX7,PLAUR,PLAU,IL6,SERPINE2,PDGFC	0.00091	0.0076	blood coagulation
Process	GO.0031667	13	455	9606	9606.ENSP00000252809,9606.ENSP00000261292,9606.ENSP00000263341,9606.ENSP00000264832,9606.ENSP00000265087,9606.ENSP00000294728,9606.ENSP00000296585,9606.ENSP00000322706,9606.ENSP00000330696,9606.ENSP00000356125,9606.ENSP00000360076,9606.ENSP00000362179,9606.ENSP00000454071	GDF15,LIPG,IL1B,ICAM1,STC2,VCAM1,ITGA2,HMGCS1,P2RX7,NUAK2,SGIP1,ZC3H12A,LDLR	0.00095	0.0079	response to nutrient levels
Process	GO.1905953	4	40	9606	9606.ENSP00000216797,9606.ENSP00000226574,9606.ENSP00000260356,9606.ENSP00000385675	NFKBIA,NFKB1,THBS1,IL6	0.00099	0.0081	negative regulation of lipid localization
Process	GO.0070487	2	3	9606	9606.ENSP00000263341,9606.ENSP00000398632	IL1B,CD44	0.00099	0.0081	monocyte aggregation
Process	GO.0043030	4	40	9606	9606.ENSP00000004531,9606.ENSP00000260356,9606.ENSP00000362179,9606.ENSP00000454071	SLC7A2,THBS1,ZC3H12A,LDLR	0.00099	0.0081	regulation of macrophage activation
Process	GO.0034344	2	3	9606	9606.ENSP00000263642,9606.ENSP00000369213	IFIH1,DDX58	0.00099	0.0081	regulation of type III interferon production
Process	GO.2000319	3	17	9606	9606.ENSP00000228534,9606.ENSP00000325663,9606.ENSP00000362179	IL23A,NFKBIZ,ZC3H12A	0.001	0.0082	regulation of T-helper 17 cell differentiation
Process	GO.0048872	8	193	9606	9606.ENSP00000242208,9606.ENSP00000330696,9606.ENSP00000365048,9606.ENSP00000376943,9606.ENSP00000385675,9606.ENSP00000391676,9606.ENSP00000392025,9606.ENSP00000481570	INHBA,P2RX7,TNFSF13B,BCL2L11,IL6,JAK3,CYLD,TNFAIP3	0.001	0.0082	homeostasis of number of cells
Process	GO.0046209	3	17	9606	9606.ENSP00000004531,9606.ENSP00000260010,9606.ENSP00000419045	SLC7A2,TLR2,GCH1	0.001	0.0082	nitric oxide metabolic process
Process	GO.0045446	5	71	9606	9606.ENSP00000254958,9606.ENSP00000264832,9606.ENSP00000295522,9606.ENSP00000297316,9606.ENSP00000365280	JAG1,ICAM1,CLDN1,SOX17,ID1	0.001	0.0082	endothelial cell differentiation
Process	GO.0042326	13	458	9606	9606.ENSP00000161559,9606.ENSP00000240100,9606.ENSP00000242208,9606.ENSP00000263341,9606.ENSP00000288840,9606.ENSP00000317891,9606.ENSP00000330696,9606.ENSP00000359504,9606.ENSP00000360296,9606.ENSP00000362179,9606.ENSP00000375907,9606.ENSP00000475915,9606.ENSP00000481570	CEACAM1,DUSP4,INHBA,IL1B,SMAD6,TNIP1,P2RX7,GBP1,PPAP2B,ZC3H12A,PID1,CNKSR3,TNFAIP3	0.001	0.0082	negative regulation of phosphorylation
Process	GO.0032693	3	17	9606	9606.ENSP00000228534,9606.ENSP00000296861,9606.ENSP00000391676	IL23A,TNFRSF21,JAK3	0.001	0.0082	negative regulation of interleukin-10 production
Process	GO.2000116	9	243	9606	9606.ENSP00000220751,9606.ENSP00000241261,9606.ENSP00000260356,9606.ENSP00000263464,9606.ENSP00000265598,9606.ENSP00000339328,9606.ENSP00000376943,9606.ENSP00000398632,9606.ENSP00000427424	RIPK2,TNFSF10,THBS1,BIRC3,LAMP3,PLAUR,BCL2L11,CD44,TNFAIP8	0.0011	0.0086	regulation of cysteine-type endopeptidase activity
Process	GO.0045581	4	41	9606	9606.ENSP00000245414,9606.ENSP00000362179,9606.ENSP00000391676,9606.ENSP00000392025	IRF1,ZC3H12A,JAK3,CYLD	0.0011	0.0086	negative regulation of T cell differentiation
Process	GO.0002548	4	41	9606	9606.ENSP00000006053,9606.ENSP00000225831,9606.ENSP00000351671,9606.ENSP00000385675	CX3CL1,CCL2,CCL20,IL6	0.0011	0.0086	monocyte chemotaxis
Process	GO.0097190	10	295	9606	9606.ENSP00000242208,9606.ENSP00000263339,9606.ENSP00000263341,9606.ENSP00000296861,9606.ENSP00000330696,9606.ENSP00000346697,9606.ENSP00000355249,9606.ENSP00000355996,9606.ENSP00000376943,9606.ENSP00000446252	INHBA,IL1A,IL1B,TNFRSF21,P2RX7,BMF,E2F2,G0S2,BCL2L11,SOD2	0.0011	0.0087	apoptotic signaling pathway
Process	GO.0070374	8	196	9606	9606.ENSP00000006053,9606.ENSP00000220751,9606.ENSP00000225831,9606.ENSP00000263923,9606.ENSP00000264832,9606.ENSP00000351671,9606.ENSP00000398632,9606.ENSP00000422464	CX3CL1,RIPK2,CCL2,KDR,ICAM1,CCL20,CD44,PDGFC	0.0011	0.0088	positive regulation of ERK1 and ERK2 cascade
Process	GO.0045861	11	349	9606	9606.ENSP00000220809,9606.ENSP00000222543,9606.ENSP00000245907,9606.ENSP00000260356,9606.ENSP00000263464,9606.ENSP00000265598,9606.ENSP00000287814,9606.ENSP00000339328,9606.ENSP00000398632,9606.ENSP00000415786,9606.ENSP00000427424	PLAT,TFPI2,C3,THBS1,BIRC3,LAMP3,TIMP4,PLAUR,CD44,SERPINE2,TNFAIP8	0.0011	0.0088	negative regulation of proteolysis
Process	GO.0030154	53	3457	9606	9606.ENSP00000006053,9606.ENSP00000221452,9606.ENSP00000225474,9606.ENSP00000225831,9606.ENSP00000242208,9606.ENSP00000245414,9606.ENSP00000252809,9606.ENSP00000254958,9606.ENSP00000256759,9606.ENSP00000260010,9606.ENSP00000263339,9606.ENSP00000263341,9606.ENSP00000263923,9606.ENSP00000264346,9606.ENSP00000264832,9606.ENSP00000265361,9606.ENSP00000265362,9606.ENSP00000284136,9606.ENSP00000288840,…	CX3CL1,RELB,CSF3,CCL2,INHBA,IRF1,GDF15,JAG1,FST,TLR2,IL1A,IL1B,KDR,HERC6,ICAM1,SEMA3C,SEMA3A,SEMA3D,SMAD6,VCAM1,CLDN1,HHIP,ITGA2,TNFRSF21,SOX17,CLEC4E,FGF5,DAB2,ANGPT2,ZBTB16,NTN4,ETV7,NR4A2,LHX9,SEMA6C,NFKB2,ZC3H12A,ID1,NEBL,B4GALT1,DSP,MSX1,TYMP,IL6,JAK3,CYLD,KBTBD8,HDAC9,SERPINE2,POU2F2,HMGA2,FRY,LDLR	0.0011	0.009	cell differentiation
Process	GO.0031341	5	73	9606	9606.ENSP00000161559,9606.ENSP00000228534,9606.ENSP00000264832,9606.ENSP00000330696,9606.ENSP00000376943	CEACAM1,IL23A,ICAM1,P2RX7,BCL2L11	0.0011	0.0091	regulation of cell killing
Process	GO.0010556	61	4143	9606	9606.ENSP00000216797,9606.ENSP00000220751,9606.ENSP00000221452,9606.ENSP00000222553,9606.ENSP00000225474,9606.ENSP00000225831,9606.ENSP00000226574,9606.ENSP00000228534,9606.ENSP00000242208,9606.ENSP00000245414,9606.ENSP00000252809,9606.ENSP00000254958,9606.ENSP00000256458,9606.ENSP00000256495,9606.ENSP00000256759,9606.ENSP00000260010,9606.ENSP00000260356,9606.ENSP00000263339,9606.ENSP00000263341,…	NFKBIA,RIPK2,RELB,NAMPT,CSF3,CCL2,NFKB1,IL23A,INHBA,IRF1,GDF15,JAG1,IRAK2,BHLHE40,FST,TLR2,THBS1,IL1A,IL1B,KDR,ICAM1,JDP2,NFKBIE,SMAD6,BCL6B,ITGA2,SOX17,DAB2,TNIP1,NFKBIZ,MXD4,ZBTB16,ETV7,NR4A2,CCL20,E2F2,LHX9,BLZF1,NFKB2,NFIA,PPAP2B,TSC22D3,ZC3H12A,TRAF1,ID1,DDX58,TRIM22,MSX1,PID1,ETS1,IL6,JAK3,CYLD,TSC22D1,KBTBD8,HDAC9,POU2F2,HMGA2,SOD2,ADAM8,TNFAIP3	0.0012	0.0093	regulation of macromolecule biosynthetic process
Process	GO.0031327	28	1479	9606	9606.ENSP00000161559,9606.ENSP00000221452,9606.ENSP00000226574,9606.ENSP00000242208,9606.ENSP00000245414,9606.ENSP00000256495,9606.ENSP00000256759,9606.ENSP00000267569,9606.ENSP00000293805,9606.ENSP00000297316,9606.ENSP00000313391,9606.ENSP00000337889,9606.ENSP00000338157,9606.ENSP00000341843,9606.ENSP00000344479,9606.ENSP00000356357,9606.ENSP00000358983,9606.ENSP00000360231,9606.ENSP00000361458,…	CEACAM1,RELB,NFKB1,INHBA,IRF1,BHLHE40,FST,JDP2,BCL6B,SOX17,DAB2,MXD4,ZBTB16,ETV7,NR4A2,LHX9,NFKB2,NFIA,TSC22D3,ZC3H12A,ID1,TRIM22,MSX1,PID1,IL6,JAK3,HDAC9,HMGA2	0.0012	0.0095	negative regulation of cellular biosynthetic process
Process	GO.0090087	16	654	9606	9606.ENSP00000220751,9606.ENSP00000260010,9606.ENSP00000263339,9606.ENSP00000263341,9606.ENSP00000263642,9606.ENSP00000285379,9606.ENSP00000296861,9606.ENSP00000299663,9606.ENSP00000322775,9606.ENSP00000330696,9606.ENSP00000353362,9606.ENSP00000359504,9606.ENSP00000362179,9606.ENSP00000369213,9606.ENSP00000385675,9606.ENSP00000453302	RIPK2,TLR2,IL1A,IL1B,IFIH1,CA2,TNFRSF21,CLEC4E,RHBDF2,P2RX7,CACNA1A,GBP1,ZC3H12A,DDX58,IL6,ADAM8	0.0013	0.01	regulation of peptide transport
Process	GO.0051098	11	356	9606	9606.ENSP00000216797,9606.ENSP00000220751,9606.ENSP00000225474,9606.ENSP00000296585,9606.ENSP00000313391,9606.ENSP00000339328,9606.ENSP00000360891,9606.ENSP00000365280,9606.ENSP00000372170,9606.ENSP00000392025,9606.ENSP00000437621	NFKBIA,RIPK2,CSF3,ITGA2,DAB2,PLAUR,IFIT2,ID1,MSX1,CYLD,HMGA2	0.0013	0.01	regulation of binding
Process	GO.0048511	9	250	9606	9606.ENSP00000221452,9606.ENSP00000222553,9606.ENSP00000242208,9606.ENSP00000256495,9606.ENSP00000287814,9606.ENSP00000358983,9606.ENSP00000365280,9606.ENSP00000376436,9606.ENSP00000453076	RELB,NAMPT,INHBA,BHLHE40,TIMP4,NFKB2,ID1,ETS1,GPR176	0.0013	0.01	rhythmic process
Process	GO.1904467	3	19	9606	9606.ENSP00000263642,9606.ENSP00000362179,9606.ENSP00000369213	IFIH1,ZC3H12A,DDX58	0.0013	0.0104	regulation of tumor necrosis factor secretion
Process	GO.0051701	7	156	9606	9606.ENSP00000264832,9606.ENSP00000295522,9606.ENSP00000296585,9606.ENSP00000317891,9606.ENSP00000362179,9606.ENSP00000376943,9606.ENSP00000454071	ICAM1,CLDN1,ITGA2,TNIP1,ZC3H12A,BCL2L11,LDLR	0.0013	0.0104	interaction with host
Process	GO.0002827	3	19	9606	9606.ENSP00000220751,9606.ENSP00000228534,9606.ENSP00000263341	RIPK2,IL23A,IL1B	0.0013	0.0104	positive regulation of T-helper 1 type immune response
Process	GO.0071496	10	305	9606	9606.ENSP00000226574,9606.ENSP00000243457,9606.ENSP00000245414,9606.ENSP00000263341,9606.ENSP00000264832,9606.ENSP00000296585,9606.ENSP00000330696,9606.ENSP00000344479,9606.ENSP00000356125,9606.ENSP00000362179	NFKB1,KCNJ2,IRF1,IL1B,ICAM1,ITGA2,P2RX7,NR4A2,NUAK2,ZC3H12A	0.0014	0.0106	cellular response to external stimulus
Process	GO.0046677	10	305	9606	9606.ENSP00000225474,9606.ENSP00000264832,9606.ENSP00000294728,9606.ENSP00000295522,9606.ENSP00000362179,9606.ENSP00000365280,9606.ENSP00000376436,9606.ENSP00000384212,9606.ENSP00000385675,9606.ENSP00000481570	CSF3,ICAM1,VCAM1,CLDN1,ZC3H12A,ID1,ETS1,IL18BP,IL6,TNFAIP3	0.0014	0.0106	response to antibiotic
Process	GO.0014075	4	44	9606	9606.ENSP00000264832,9606.ENSP00000296585,9606.ENSP00000344479,9606.ENSP00000408617	ICAM1,ITGA2,NR4A2,HDAC9	0.0014	0.0106	response to amine
Process	GO.1903901	5	77	9606	9606.ENSP00000257570,9606.ENSP00000295927,9606.ENSP00000317891,9606.ENSP00000362179,9606.ENSP00000437621	OASL,PTX3,TNIP1,ZC3H12A,HMGA2	0.0014	0.011	negative regulation of viral life cycle
Process	GO.0043434	11	362	9606	9606.ENSP00000161559,9606.ENSP00000226574,9606.ENSP00000241261,9606.ENSP00000260010,9606.ENSP00000264832,9606.ENSP00000265087,9606.ENSP00000285379,9606.ENSP00000287814,9606.ENSP00000344479,9606.ENSP00000391676,9606.ENSP00000408617	CEACAM1,NFKB1,TNFSF10,TLR2,ICAM1,STC2,CA2,TIMP4,NR4A2,JAK3,HDAC9	0.0015	0.0111	response to peptide hormone
Process	GO.2001242	7	159	9606	9606.ENSP00000339328,9606.ENSP00000346697,9606.ENSP00000372170,9606.ENSP00000376943,9606.ENSP00000392025,9606.ENSP00000398632,9606.ENSP00000446252	PLAUR,BMF,MSX1,BCL2L11,CYLD,CD44,SOD2	0.0015	0.0112	regulation of intrinsic apoptotic signaling pathway
Process	GO.2000346	2	4	9606	9606.ENSP00000161559,9606.ENSP00000326888	CEACAM1,LIMS2	0.0015	0.0112	negative regulation of hepatocyte proliferation
Process	GO.0070613	6	116	9606	9606.ENSP00000245907,9606.ENSP00000260356,9606.ENSP00000263464,9606.ENSP00000415786,9606.ENSP00000438615,9606.ENSP00000453302	C3,THBS1,BIRC3,SERPINE2,C1R,ADAM8	0.0015	0.0112	regulation of protein processing
Process	GO.0051101	6	116	9606	9606.ENSP00000216797,9606.ENSP00000296585,9606.ENSP00000339328,9606.ENSP00000365280,9606.ENSP00000372170,9606.ENSP00000437621	NFKBIA,ITGA2,PLAUR,ID1,MSX1,HMGA2	0.0015	0.0112	regulation of DNA binding
Process	GO.0048305	2	4	9606	9606.ENSP00000365048,9606.ENSP00000431603	TNFSF13B,POU2F2	0.0015	0.0112	immunoglobulin secretion
Process	GO.0046638	4	45	9606	9606.ENSP00000220751,9606.ENSP00000228534,9606.ENSP00000325663,9606.ENSP00000338157	RIPK2,IL23A,NFKBIZ,ZBTB16	0.0015	0.0112	positive regulation of alpha-beta T cell differentiation
Process	GO.0046208	2	4	9606	9606.ENSP00000368572,9606.ENSP00000478305	SAT1,SMOX	0.0015	0.0112	spermine catabolic process
Process	GO.0035549	2	4	9606	9606.ENSP00000263642,9606.ENSP00000369213	IFIH1,DDX58	0.0015	0.0112	positive regulation of interferon-beta secretion
Process	GO.0071260	5	78	9606	9606.ENSP00000226574,9606.ENSP00000243457,9606.ENSP00000245414,9606.ENSP00000263341,9606.ENSP00000296585	NFKB1,KCNJ2,IRF1,IL1B,ITGA2	0.0015	0.0113	cellular response to mechanical stimulus
Process	GO.1903532	11	364	9606	9606.ENSP00000220751,9606.ENSP00000242208,9606.ENSP00000260010,9606.ENSP00000263339,9606.ENSP00000263341,9606.ENSP00000263642,9606.ENSP00000299663,9606.ENSP00000330696,9606.ENSP00000369213,9606.ENSP00000385675,9606.ENSP00000453302	RIPK2,INHBA,TLR2,IL1A,IL1B,IFIH1,CLEC4E,P2RX7,DDX58,IL6,ADAM8	0.0015	0.0114	positive regulation of secretion by cell
Process	GO.0023019	3	20	9606	9606.ENSP00000297316,9606.ENSP00000311697,9606.ENSP00000372170	SOX17,FGF5,MSX1	0.0015	0.0114	signal transduction involved in regulation of gene expression
Process	GO.0051222	11	365	9606	9606.ENSP00000220751,9606.ENSP00000260010,9606.ENSP00000263339,9606.ENSP00000263341,9606.ENSP00000263642,9606.ENSP00000299663,9606.ENSP00000330696,9606.ENSP00000362179,9606.ENSP00000369213,9606.ENSP00000385675,9606.ENSP00000453302	RIPK2,TLR2,IL1A,IL1B,IFIH1,CLEC4E,P2RX7,ZC3H12A,DDX58,IL6,ADAM8	0.0016	0.0115	positive regulation of protein transport
Process	GO.0050728	6	117	9606	9606.ENSP00000226574,9606.ENSP00000243347,9606.ENSP00000362179,9606.ENSP00000376436,9606.ENSP00000454071,9606.ENSP00000481570	NFKB1,TNFAIP6,ZC3H12A,ETS1,LDLR,TNFAIP3	0.0015	0.0115	negative regulation of inflammatory response
Process	GO.0001933	12	422	9606	9606.ENSP00000161559,9606.ENSP00000240100,9606.ENSP00000263341,9606.ENSP00000288840,9606.ENSP00000317891,9606.ENSP00000330696,9606.ENSP00000359504,9606.ENSP00000360296,9606.ENSP00000362179,9606.ENSP00000375907,9606.ENSP00000475915,9606.ENSP00000481570	CEACAM1,DUSP4,IL1B,SMAD6,TNIP1,P2RX7,GBP1,PPAP2B,ZC3H12A,PID1,CNKSR3,TNFAIP3	0.0015	0.0115	negative regulation of protein phosphorylation
Process	GO.0043330	4	46	9606	9606.ENSP00000216797,9606.ENSP00000220751,9606.ENSP00000263642,9606.ENSP00000369213	NFKBIA,RIPK2,IFIH1,DDX58	0.0016	0.0118	response to exogenous dsRNA
Process	GO.0032653	4	46	9606	9606.ENSP00000228534,9606.ENSP00000260010,9606.ENSP00000296861,9606.ENSP00000391676	IL23A,TLR2,TNFRSF21,JAK3	0.0016	0.0118	regulation of interleukin-10 production
Process	GO.0050864	6	118	9606	9606.ENSP00000242208,9606.ENSP00000296861,9606.ENSP00000365048,9606.ENSP00000385675,9606.ENSP00000392025,9606.ENSP00000481570	INHBA,TNFRSF21,TNFSF13B,IL6,CYLD,TNFAIP3	0.0016	0.0119	regulation of B cell activation
Process	GO.0043281	8	209	9606	9606.ENSP00000241261,9606.ENSP00000260356,9606.ENSP00000263464,9606.ENSP00000265598,9606.ENSP00000339328,9606.ENSP00000376943,9606.ENSP00000398632,9606.ENSP00000427424	TNFSF10,THBS1,BIRC3,LAMP3,PLAUR,BCL2L11,CD44,TNFAIP8	0.0016	0.012	regulation of cysteine-type endopeptidase activity involved in apoptotic process
Process	GO.0032088	5	80	9606	9606.ENSP00000216797,9606.ENSP00000256458,9606.ENSP00000362179,9606.ENSP00000392025,9606.ENSP00000481570	NFKBIA,IRAK2,ZC3H12A,CYLD,TNFAIP3	0.0017	0.0123	negative regulation of NF-kappaB transcription factor activity
Process	GO.0045624	3	21	9606	9606.ENSP00000220751,9606.ENSP00000228534,9606.ENSP00000325663	RIPK2,IL23A,NFKBIZ	0.0017	0.0127	positive regulation of T-helper cell differentiation
Process	GO.0042730	3	21	9606	9606.ENSP00000220809,9606.ENSP00000339328,9606.ENSP00000361850	PLAT,PLAUR,PLAU	0.0017	0.0127	fibrinolysis
Process	GO.0034114	3	21	9606	9606.ENSP00000259206,9606.ENSP00000263341,9606.ENSP00000398632	IL1RN,IL1B,CD44	0.0017	0.0127	regulation of heterotypic cell-cell adhesion
Process	GO.0032703	3	21	9606	9606.ENSP00000359504,9606.ENSP00000381007,9606.ENSP00000481570	GBP1,NAV3,TNFAIP3	0.0017	0.0127	negative regulation of interleukin-2 production
Process	GO.0043901	8	212	9606	9606.ENSP00000161559,9606.ENSP00000251642,9606.ENSP00000257570,9606.ENSP00000295927,9606.ENSP00000317891,9606.ENSP00000362179,9606.ENSP00000437621,9606.ENSP00000481570	CEACAM1,DHX58,OASL,PTX3,TNIP1,ZC3H12A,HMGA2,TNFAIP3	0.0018	0.0129	negative regulation of multi-organism process
Process	GO.0043086	18	809	9606	9606.ENSP00000161559,9606.ENSP00000222543,9606.ENSP00000226574,9606.ENSP00000240100,9606.ENSP00000245907,9606.ENSP00000260356,9606.ENSP00000263341,9606.ENSP00000263464,9606.ENSP00000265074,9606.ENSP00000265598,9606.ENSP00000287814,9606.ENSP00000295927,9606.ENSP00000339328,9606.ENSP00000398632,9606.ENSP00000415786,9606.ENSP00000427424,9606.ENSP00000445043,9606.ENSP00000481570	CEACAM1,TFPI2,NFKB1,DUSP4,C3,THBS1,IL1B,BIRC3,NPR3,LAMP3,TIMP4,PTX3,PLAUR,CD44,SERPINE2,TNFAIP8,FRY,TNFAIP3	0.0018	0.013	negative regulation of catalytic activity
Process	GO.0000122	18	809	9606	9606.ENSP00000221452,9606.ENSP00000226574,9606.ENSP00000256495,9606.ENSP00000256759,9606.ENSP00000267569,9606.ENSP00000293805,9606.ENSP00000297316,9606.ENSP00000337889,9606.ENSP00000338157,9606.ENSP00000341843,9606.ENSP00000344479,9606.ENSP00000358983,9606.ENSP00000360231,9606.ENSP00000361458,9606.ENSP00000365280,9606.ENSP00000372170,9606.ENSP00000408617,9606.ENSP00000437621	RELB,NFKB1,BHLHE40,FST,JDP2,BCL6B,SOX17,MXD4,ZBTB16,ETV7,NR4A2,NFKB2,NFIA,TSC22D3,ID1,MSX1,HDAC9,HMGA2	0.0018	0.013	negative regulation of transcription by RNA polymerase II
Process	GO.0010638	14	552	9606	9606.ENSP00000225474,9606.ENSP00000241261,9606.ENSP00000263339,9606.ENSP00000263341,9606.ENSP00000263923,9606.ENSP00000264832,9606.ENSP00000267569,9606.ENSP00000330696,9606.ENSP00000339328,9606.ENSP00000346697,9606.ENSP00000365280,9606.ENSP00000372170,9606.ENSP00000376943,9606.ENSP00000381007	CSF3,TNFSF10,IL1A,IL1B,KDR,ICAM1,JDP2,P2RX7,PLAUR,BMF,ID1,MSX1,BCL2L11,NAV3	0.0018	0.0133	positive regulation of organelle organization
Process	GO.0070542	5	82	9606	9606.ENSP00000260010,9606.ENSP00000295522,9606.ENSP00000362179,9606.ENSP00000375907,9606.ENSP00000454071	TLR2,CLDN1,ZC3H12A,PID1,LDLR	0.0019	0.0134	response to fatty acid
Process	GO.0071887	3	22	9606	9606.ENSP00000296861,9606.ENSP00000376943,9606.ENSP00000385675	TNFRSF21,BCL2L11,IL6	0.002	0.0141	leukocyte apoptotic process
Process	GO.0035584	3	22	9606	9606.ENSP00000263923,9606.ENSP00000294728,9606.ENSP00000351671	KDR,VCAM1,CCL20	0.002	0.0141	calcium-mediated signaling using intracellular calcium source
Process	GO.0035455	3	22	9606	9606.ENSP00000265598,9606.ENSP00000360883,9606.ENSP00000360891	LAMP3,IFIT3,IFIT2	0.002	0.0141	response to interferon-alpha
Process	GO.0010884	3	22	9606	9606.ENSP00000226574,9606.ENSP00000245907,9606.ENSP00000362179	NFKB1,C3,ZC3H12A	0.002	0.0141	positive regulation of lipid storage
Process	GO.2001239	4	49	9606	9606.ENSP00000006053,9606.ENSP00000242208,9606.ENSP00000263339,9606.ENSP00000263341	CX3CL1,INHBA,IL1A,IL1B	0.002	0.0142	regulation of extrinsic apoptotic signaling pathway in absence of ligand
Process	GO.0072001	9	267	9606	9606.ENSP00000234111,9606.ENSP00000254958,9606.ENSP00000285379,9606.ENSP00000288840,9606.ENSP00000297316,9606.ENSP00000314897,9606.ENSP00000338157,9606.ENSP00000360231,9606.ENSP00000376943	ODC1,JAG1,CA2,SMAD6,SOX17,ANGPT2,ZBTB16,NFIA,BCL2L11	0.002	0.0142	renal system development
Process	GO.2000660	2	5	9606	9606.ENSP00000259206,9606.ENSP00000385675	IL1RN,IL6	0.002	0.0145	negative regulation of interleukin-1-mediated signaling pathway
Process	GO.2000630	2	5	9606	9606.ENSP00000226574,9606.ENSP00000362179	NFKB1,ZC3H12A	0.002	0.0145	positive regulation of miRNA metabolic process
Process	GO.2000391	2	5	9606	9606.ENSP00000263339,9606.ENSP00000453302	IL1A,ADAM8	0.002	0.0145	positive regulation of neutrophil extravasation
Process	GO.2000377	7	169	9606	9606.ENSP00000260356,9606.ENSP00000263341,9606.ENSP00000264832,9606.ENSP00000295927,9606.ENSP00000362179,9606.ENSP00000375907,9606.ENSP00000419045	THBS1,IL1B,ICAM1,PTX3,ZC3H12A,PID1,GCH1	0.0021	0.0145	regulation of reactive oxygen species metabolic process
Process	GO.0060666	2	5	9606	9606.ENSP00000265361,9606.ENSP00000265362	SEMA3C,SEMA3A	0.002	0.0145	dichotomous subdivision of terminal units involved in salivary gland branching
Process	GO.0039528	2	5	9606	9606.ENSP00000263642,9606.ENSP00000369213	IFIH1,DDX58	0.002	0.0145	cytoplasmic pattern recognition receptor signaling pathway in response to virus
Process	GO.0034134	2	5	9606	9606.ENSP00000220751,9606.ENSP00000260010	RIPK2,TLR2	0.002	0.0145	toll-like receptor 2 signaling pathway
Process	GO.0022614	2	5	9606	9606.ENSP00000264832,9606.ENSP00000294728	ICAM1,VCAM1	0.002	0.0145	membrane to membrane docking
Process	GO.0010986	2	5	9606	9606.ENSP00000261292,9606.ENSP00000454071	LIPG,LDLR	0.002	0.0145	positive regulation of lipoprotein particle clearance
Process	GO.0009597	2	5	9606	9606.ENSP00000263642,9606.ENSP00000369213	IFIH1,DDX58	0.002	0.0145	detection of virus
Process	GO.0000165	10	323	9606	9606.ENSP00000220751,9606.ENSP00000225831,9606.ENSP00000226574,9606.ENSP00000228280,9606.ENSP00000256458,9606.ENSP00000263341,9606.ENSP00000263923,9606.ENSP00000265080,9606.ENSP00000311697,9606.ENSP00000391676	RIPK2,CCL2,NFKB1,KITLG,IRAK2,IL1B,KDR,RASGRF2,FGF5,JAK3	0.0021	0.0145	MAPK cascade
Process	GO.0071359	4	50	9606	9606.ENSP00000226574,9606.ENSP00000263642,9606.ENSP00000330696,9606.ENSP00000369213	NFKB1,IFIH1,P2RX7,DDX58	0.0021	0.0148	cellular response to dsRNA
Process	GO.1903077	3	23	9606	9606.ENSP00000313391,9606.ENSP00000359504,9606.ENSP00000375907	DAB2,GBP1,PID1	0.0022	0.0152	negative regulation of protein localization to plasma membrane
Process	GO.0045935	31	1770	9606	9606.ENSP00000216797,9606.ENSP00000220751,9606.ENSP00000221452,9606.ENSP00000222553,9606.ENSP00000225474,9606.ENSP00000226574,9606.ENSP00000228534,9606.ENSP00000242208,9606.ENSP00000245414,9606.ENSP00000254958,9606.ENSP00000260010,9606.ENSP00000263339,9606.ENSP00000263341,9606.ENSP00000288840,9606.ENSP00000297316,9606.ENSP00000313391,9606.ENSP00000317891,9606.ENSP00000330696,9606.ENSP00000338157,…	NFKBIA,RIPK2,RELB,NAMPT,CSF3,NFKB1,IL23A,INHBA,IRF1,JAG1,TLR2,IL1A,IL1B,SMAD6,SOX17,DAB2,TNIP1,P2RX7,ZBTB16,NR4A2,E2F2,NFKB2,NFIA,ZC3H12A,DDX58,MSX1,PID1,ETS1,IL6,POU2F2,HMGA2	0.0022	0.0152	positive regulation of nucleobase-containing compound metabolic process
Process	GO.0032727	3	23	9606	9606.ENSP00000220751,9606.ENSP00000263642,9606.ENSP00000369213	RIPK2,IFIH1,DDX58	0.0022	0.0152	positive regulation of interferon-alpha production
Process	GO.0050790	37	2249	9606	9606.ENSP00000006053,9606.ENSP00000161559,9606.ENSP00000220751,9606.ENSP00000222543,9606.ENSP00000225831,9606.ENSP00000226574,9606.ENSP00000228534,9606.ENSP00000240100,9606.ENSP00000241261,9606.ENSP00000245907,9606.ENSP00000252809,9606.ENSP00000256458,9606.ENSP00000260356,9606.ENSP00000263341,9606.ENSP00000263464,9606.ENSP00000264832,9606.ENSP00000265074,9606.ENSP00000265598,9606.ENSP00000287814,…	CX3CL1,CEACAM1,RIPK2,TFPI2,CCL2,NFKB1,IL23A,DUSP4,TNFSF10,C3,GDF15,IRAK2,THBS1,IL1B,BIRC3,ICAM1,NPR3,LAMP3,TIMP4,PTX3,ITGA2,P2RX7,SELE,PLAUR,NR4A2,CCL20,BCL2L11,CXCL1,CD44,DOCK4,SERPINE2,GCH1,PDGFC,TNFAIP8,FRY,ADAM8,TNFAIP3	0.0024	0.0162	regulation of catalytic activity
Process	GO.1901699	14	568	9606	9606.ENSP00000161559,9606.ENSP00000220751,9606.ENSP00000226574,9606.ENSP00000263642,9606.ENSP00000264832,9606.ENSP00000285379,9606.ENSP00000330696,9606.ENSP00000344479,9606.ENSP00000353362,9606.ENSP00000365280,9606.ENSP00000369213,9606.ENSP00000391676,9606.ENSP00000408617,9606.ENSP00000422464	CEACAM1,RIPK2,NFKB1,IFIH1,ICAM1,CA2,P2RX7,NR4A2,CACNA1A,ID1,DDX58,JAK3,HDAC9,PDGFC	0.0024	0.0163	cellular response to nitrogen compound
Process	GO.0016579	9	275	9606	9606.ENSP00000216797,9606.ENSP00000263464,9606.ENSP00000263642,9606.ENSP00000317891,9606.ENSP00000345216,9606.ENSP00000362179,9606.ENSP00000369213,9606.ENSP00000392025,9606.ENSP00000481570	NFKBIA,BIRC3,IFIH1,TNIP1,USP54,ZC3H12A,DDX58,CYLD,TNFAIP3	0.0024	0.0165	protein deubiquitination
Process	GO.0006355	54	3661	9606	9606.ENSP00000216797,9606.ENSP00000220751,9606.ENSP00000221452,9606.ENSP00000222553,9606.ENSP00000225474,9606.ENSP00000226574,9606.ENSP00000228534,9606.ENSP00000242208,9606.ENSP00000245414,9606.ENSP00000252809,9606.ENSP00000254958,9606.ENSP00000256458,9606.ENSP00000256495,9606.ENSP00000256759,9606.ENSP00000260010,9606.ENSP00000263339,9606.ENSP00000263341,9606.ENSP00000264832,9606.ENSP00000267569,…	NFKBIA,RIPK2,RELB,NAMPT,CSF3,NFKB1,IL23A,INHBA,IRF1,GDF15,JAG1,IRAK2,BHLHE40,FST,TLR2,IL1A,IL1B,ICAM1,JDP2,NFKBIE,SMAD6,BCL6B,SOX17,DAB2,TNIP1,NFKBIZ,MXD4,ZBTB16,ETV7,NR4A2,E2F2,LHX9,BLZF1,NFKB2,NFIA,PPAP2B,TSC22D3,ZC3H12A,TRAF1,ID1,DDX58,TRIM22,MSX1,PID1,ETS1,IL6,CYLD,TSC22D1,HDAC9,POU2F2,HMGA2,SOD2,ADAM8,TNFAIP3	0.0024	0.0165	regulation of transcription, DNA-templated
Process	GO.2000191	3	24	9606	9606.ENSP00000260356,9606.ENSP00000263341,9606.ENSP00000330696	THBS1,IL1B,P2RX7	0.0025	0.0166	regulation of fatty acid transport
Process	GO.0060760	4	52	9606	9606.ENSP00000220751,9606.ENSP00000260010,9606.ENSP00000263642,9606.ENSP00000369213	RIPK2,TLR2,IFIH1,DDX58	0.0024	0.0166	positive regulation of response to cytokine stimulus
Process	GO.0051043	3	24	9606	9606.ENSP00000263341,9606.ENSP00000287814,9606.ENSP00000453302	IL1B,TIMP4,ADAM8	0.0025	0.0166	regulation of membrane protein ectodomain proteolysis
Process	GO.0046890	7	174	9606	9606.ENSP00000161559,9606.ENSP00000226574,9606.ENSP00000245907,9606.ENSP00000263341,9606.ENSP00000265896,9606.ENSP00000322706,9606.ENSP00000454071	CEACAM1,NFKB1,C3,IL1B,SQLE,HMGCS1,LDLR	0.0024	0.0166	regulation of lipid biosynthetic process
Process	GO.0045071	4	52	9606	9606.ENSP00000257570,9606.ENSP00000317891,9606.ENSP00000362179,9606.ENSP00000437621	OASL,TNIP1,ZC3H12A,HMGA2	0.0024	0.0166	negative regulation of viral genome replication
Process	GO.0043392	4	52	9606	9606.ENSP00000216797,9606.ENSP00000365280,9606.ENSP00000372170,9606.ENSP00000437621	NFKBIA,ID1,MSX1,HMGA2	0.0024	0.0166	negative regulation of DNA binding
Process	GO.0032880	19	901	9606	9606.ENSP00000220751,9606.ENSP00000260010,9606.ENSP00000263339,9606.ENSP00000263341,9606.ENSP00000263642,9606.ENSP00000296861,9606.ENSP00000299663,9606.ENSP00000313391,9606.ENSP00000322775,9606.ENSP00000330696,9606.ENSP00000353362,9606.ENSP00000359504,9606.ENSP00000362179,9606.ENSP00000369213,9606.ENSP00000369299,9606.ENSP00000375907,9606.ENSP00000385675,9606.ENSP00000392025,9606.ENSP00000453302	RIPK2,TLR2,IL1A,IL1B,IFIH1,TNFRSF21,CLEC4E,DAB2,RHBDF2,P2RX7,CACNA1A,GBP1,ZC3H12A,DDX58,TRIM22,PID1,IL6,CYLD,ADAM8	0.0024	0.0166	regulation of protein localization
Process	GO.0010043	4	52	9606	9606.ENSP00000245185,9606.ENSP00000285379,9606.ENSP00000294728,9606.ENSP00000330696	MT2A,CA2,VCAM1,P2RX7	0.0024	0.0166	response to zinc ion
Process	GO.0001782	3	24	9606	9606.ENSP00000365048,9606.ENSP00000376943,9606.ENSP00000481570	TNFSF13B,BCL2L11,TNFAIP3	0.0025	0.0166	B cell homeostasis
Process	GO.0001706	4	52	9606	9606.ENSP00000240100,9606.ENSP00000242208,9606.ENSP00000297316,9606.ENSP00000437621	DUSP4,INHBA,SOX17,HMGA2	0.0024	0.0166	endoderm formation
Process	GO.0043535	5	88	9606	9606.ENSP00000260356,9606.ENSP00000263923,9606.ENSP00000314897,9606.ENSP00000376436,9606.ENSP00000408617	THBS1,KDR,ANGPT2,ETS1,HDAC9	0.0025	0.0168	regulation of blood vessel endothelial cell migration
Process	GO.0002708	5	88	9606	9606.ENSP00000228534,9606.ENSP00000245907,9606.ENSP00000263341,9606.ENSP00000330696,9606.ENSP00000385675	IL23A,C3,IL1B,P2RX7,IL6	0.0025	0.0168	positive regulation of lymphocyte mediated immunity
Process	GO.0016043	71	5163	9606	9606.ENSP00000005257,9606.ENSP00000006053,9606.ENSP00000225474,9606.ENSP00000225831,9606.ENSP00000243457,9606.ENSP00000245907,9606.ENSP00000259030,9606.ENSP00000260010,9606.ENSP00000260356,9606.ENSP00000261292,9606.ENSP00000262461,9606.ENSP00000263464,9606.ENSP00000263923,9606.ENSP00000264144,9606.ENSP00000264832,9606.ENSP00000265361,9606.ENSP00000265362,9606.ENSP00000284322,9606.ENSP00000294728,…	RALA,CX3CL1,CSF3,CCL2,KCNJ2,C3,RTP4,TLR2,THBS1,LIPG,SLC12A2,BIRC3,KDR,LAMC2,ICAM1,SEMA3C,SEMA3A,ABI3BP,VCAM1,CLDN1,ITGA2,SOX17,DAB2,LIMS2,P2RX7,NTN4,NR4A2,BMF,NUAK2,LHX9,BLZF1,SEMA6C,CTSS,NFKB2,GBP5,GBP1,SGIP1,NFIA,IFIT2,ZC3H12A,TRAF1,ID1,NEBL,RPGR,B4GALT1,DSP,TRIM22,MSX1,PID1,MYO1B,ETS1,BCL2L11,TYMP,CXCL1,CLDN14,IL6,DYSF,PSTPIP2,CYLD,CD44,PHLDB2,HDAC9,SERPINE2,GCH1,PDGFC,HMGA2,FRY,SOD2,ADAM8,LDL…	0.0026	0.0171	cellular component organization
Process	GO.0048762	6	130	9606	9606.ENSP00000254958,9606.ENSP00000265361,9606.ENSP00000265362,9606.ENSP00000372170,9606.ENSP00000401878,9606.ENSP00000437621	JAG1,SEMA3C,SEMA3A,MSX1,KBTBD8,HMGA2	0.0026	0.0172	mesenchymal cell differentiation
Process	GO.0002703	7	176	9606	9606.ENSP00000161559,9606.ENSP00000228534,9606.ENSP00000245907,9606.ENSP00000263341,9606.ENSP00000330696,9606.ENSP00000385675,9606.ENSP00000391676	CEACAM1,IL23A,C3,IL1B,P2RX7,IL6,JAK3	0.0026	0.0172	regulation of leukocyte mediated immunity
Process	GO.0044364	5	89	9606	9606.ENSP00000296026,9606.ENSP00000351671,9606.ENSP00000376943,9606.ENSP00000379110,9606.ENSP00000427279	CXCL3,CCL20,BCL2L11,CXCL1,CXCL2	0.0026	0.0174	disruption of cells of other organism
Process	GO.0031640	5	89	9606	9606.ENSP00000296026,9606.ENSP00000351671,9606.ENSP00000376943,9606.ENSP00000379110,9606.ENSP00000427279	CXCL3,CCL20,BCL2L11,CXCL1,CXCL2	0.0026	0.0174	killing of cells of other organism
Process	GO.0010822	5	89	9606	9606.ENSP00000241261,9606.ENSP00000263923,9606.ENSP00000339328,9606.ENSP00000346697,9606.ENSP00000376943	TNFSF10,KDR,PLAUR,BMF,BCL2L11	0.0026	0.0174	positive regulation of mitochondrion organization
Process	GO.2000778	3	25	9606	9606.ENSP00000263341,9606.ENSP00000263642,9606.ENSP00000369213	IL1B,IFIH1,DDX58	0.0027	0.018	positive regulation of interleukin-6 secretion
Process	GO.1903531	7	178	9606	9606.ENSP00000161559,9606.ENSP00000242208,9606.ENSP00000263341,9606.ENSP00000296861,9606.ENSP00000322775,9606.ENSP00000359504,9606.ENSP00000362179	CEACAM1,INHBA,IL1B,TNFRSF21,RHBDF2,GBP1,ZC3H12A	0.0027	0.018	negative regulation of secretion by cell
Process	GO.1903003	2	6	9606	9606.ENSP00000317891,9606.ENSP00000362179	TNIP1,ZC3H12A	0.0027	0.018	positive regulation of protein deubiquitination
Process	GO.0071398	4	54	9606	9606.ENSP00000295522,9606.ENSP00000362179,9606.ENSP00000375907,9606.ENSP00000454071	CLDN1,ZC3H12A,PID1,LDLR	0.0028	0.018	cellular response to fatty acid
Process	GO.0046885	3	25	9606	9606.ENSP00000226574,9606.ENSP00000263341,9606.ENSP00000265087	NFKB1,IL1B,STC2	0.0027	0.018	regulation of hormone biosynthetic process
Process	GO.0046640	3	25	9606	9606.ENSP00000220751,9606.ENSP00000228534,9606.ENSP00000245414	RIPK2,IL23A,IRF1	0.0027	0.018	regulation of alpha-beta T cell proliferation
Process	GO.0045428	4	54	9606	9606.ENSP00000263341,9606.ENSP00000264832,9606.ENSP00000295927,9606.ENSP00000362179	IL1B,ICAM1,PTX3,ZC3H12A	0.0028	0.018	regulation of nitric oxide biosynthetic process
Process	GO.0035234	2	6	9606	9606.ENSP00000263339,9606.ENSP00000263341	IL1A,IL1B	0.0027	0.018	ectopic germ cell programmed cell death
Process	GO.0032914	2	6	9606	9606.ENSP00000006053,9606.ENSP00000260356	CX3CL1,THBS1	0.0027	0.018	positive regulation of transforming growth factor beta1 production
Process	GO.0010757	2	6	9606	9606.ENSP00000260356,9606.ENSP00000415786	THBS1,SERPINE2	0.0027	0.018	negative regulation of plasminogen activation
Process	GO.0001914	3	25	9606	9606.ENSP00000161559,9606.ENSP00000228534,9606.ENSP00000330696	CEACAM1,IL23A,P2RX7	0.0027	0.018	regulation of T cell mediated cytotoxicity
Process	GO.0048732	11	395	9606	9606.ENSP00000216797,9606.ENSP00000265361,9606.ENSP00000265362,9606.ENSP00000295522,9606.ENSP00000296585,9606.ENSP00000322706,9606.ENSP00000369055,9606.ENSP00000372170,9606.ENSP00000376436,9606.ENSP00000376943,9606.ENSP00000415786	NFKBIA,SEMA3C,SEMA3A,CLDN1,ITGA2,HMGCS1,B4GALT1,MSX1,ETS1,BCL2L11,SERPINE2	0.0028	0.0182	gland development
Process	GO.0044057	13	516	9606	9606.ENSP00000242208,9606.ENSP00000243457,9606.ENSP00000263341,9606.ENSP00000264832,9606.ENSP00000265362,9606.ENSP00000296585,9606.ENSP00000296861,9606.ENSP00000361952,9606.ENSP00000362179,9606.ENSP00000369129,9606.ENSP00000379038,9606.ENSP00000404179,9606.ENSP00000419045	INHBA,KCNJ2,IL1B,ICAM1,SEMA3A,ITGA2,TNFRSF21,KCNK15,ZC3H12A,DSP,TYMP,DOCK4,GCH1	0.0028	0.0182	regulation of system process
Process	GO.0060429	21	1055	9606	9606.ENSP00000005257,9606.ENSP00000161559,9606.ENSP00000242208,9606.ENSP00000254958,9606.ENSP00000263923,9606.ENSP00000264832,9606.ENSP00000265361,9606.ENSP00000265362,9606.ENSP00000285379,9606.ENSP00000288840,9606.ENSP00000295522,9606.ENSP00000296575,9606.ENSP00000296585,9606.ENSP00000297316,9606.ENSP00000313391,9606.ENSP00000365280,9606.ENSP00000369055,9606.ENSP00000369129,9606.ENSP00000372170,…	RALA,CEACAM1,INHBA,JAG1,KDR,ICAM1,SEMA3C,SEMA3A,CA2,SMAD6,CLDN1,HHIP,ITGA2,SOX17,DAB2,ID1,B4GALT1,DSP,MSX1,CD44,SERPINE2	0.0029	0.0185	epithelium development
Process	GO.0002706	6	133	9606	9606.ENSP00000161559,9606.ENSP00000228534,9606.ENSP00000245907,9606.ENSP00000263341,9606.ENSP00000330696,9606.ENSP00000385675	CEACAM1,IL23A,C3,IL1B,P2RX7,IL6	0.0029	0.0185	regulation of lymphocyte mediated immunity
Process	GO.0050731	7	180	9606	9606.ENSP00000220751,9606.ENSP00000225474,9606.ENSP00000228534,9606.ENSP00000264832,9606.ENSP00000375795,9606.ENSP00000385675,9606.ENSP00000398632	RIPK2,CSF3,IL23A,ICAM1,IL24,IL6,CD44	0.0029	0.0187	positive regulation of peptidyl-tyrosine phosphorylation
Process	GO.0043536	4	55	9606	9606.ENSP00000260356,9606.ENSP00000263923,9606.ENSP00000376436,9606.ENSP00000408617	THBS1,KDR,ETS1,HDAC9	0.0029	0.0188	positive regulation of blood vessel endothelial cell migration
Process	GO.0006508	23	1203	9606	9606.ENSP00000216797,9606.ENSP00000220751,9606.ENSP00000220809,9606.ENSP00000226299,9606.ENSP00000226574,9606.ENSP00000245907,9606.ENSP00000260983,9606.ENSP00000263464,9606.ENSP00000263642,9606.ENSP00000317891,9606.ENSP00000322775,9606.ENSP00000325548,9606.ENSP00000330696,9606.ENSP00000345216,9606.ENSP00000357981,9606.ENSP00000361850,9606.ENSP00000362179,9606.ENSP00000369213,9606.ENSP00000370443,…	NFKBIA,RIPK2,PLAT,LAP3,NFKB1,C3,HECW2,BIRC3,IFIH1,TNIP1,RHBDF2,CNDP2,P2RX7,USP54,CTSS,PLAU,ZC3H12A,DDX58,ADAMTS6,CYLD,C1R,ADAM8,TNFAIP3	0.003	0.019	proteolysis
[truncated: 181 more rows]

## Sheet: String_treatment2
category	term	number_of_genes	number_of_genes_in_background	ncbiTaxonId	inputGenes	preferredNames	p_value	fdr	description
[truncated: 969 more rows]

## Sheet: String_treatment3
category	term	number_of_genes	number_of_genes_in_background	ncbiTaxonId	inputGenes	preferredNames	p_value	fdr	description
[truncated: 668 more rows]

## Sheet: String_treatment4
category	term	number_of_genes	number_of_genes_in_background	ncbiTaxonId	inputGenes	preferredNames	p_value	fdr	description
[truncated: 599 more rows]
