# Supplementary material for: Development of a bioinformatics platform for analysis of quantitative transcriptomics and proteomics data: the OMnalysis
Source: PeerJ. 2021 Nov 9;9:e12415. doi: 10.7717/peerj.12415 (PMC8588854; doi:10.7717/peerj.12415)
Supplement: Supplemental Information 18 [file peerj-09-12415-s018.xlsx]

## Sheet: ORA pathway treatment 1
ID	Description	GeneRatio	BgRatio	pvalue	p.adjust	qvalue	geneID	Count
bta05150	Staphylococcus aureus infection	2021-08-01	108/8995	5.94114e-11	3.80233e-09	3.25199e-09	282165/281037/282164/112441458/112443481/282166/317650/514076	8
bta04970	Salivary secretion	2021-07-01	103/8995	2.14206e-09	6.85459e-08	5.86248e-08	282165/281037/282164/112441458/112443481/282166/317650	7
bta04613	Neutrophil extracellular trap formation	2021-08-01	253/8995	5.19981e-08	1.10929e-06	9.48738e-07	282165/281037/282164/112441458/112443481/282166/317650/404122	8
bta04621	NOD-like receptor signaling pathway	2021-07-01	192/8995	1.63386e-07	2.61417e-06	2.2358e-06	282165/281037/282164/112441458/112443481/282166/317650	7
bta05152	Tuberculosis	2021-07-01	205/8995	2.55651e-07	3.27234e-06	2.79871e-06	282165/281037/282164/112441458/112443481/282166/317650	7
bta03320	PPAR signaling pathway	2021-04-01	84/8995	3.75277e-05	0.000400296	0.000342358	281758/281631/408009/281052	4
bta04979	Cholesterol metabolism	2021-03-01	50/8995	0.000200328	0.00183157	0.00156647	281631/408009/281052	3
bta04975	Fat digestion and absorption	2021-02-01	52/8995	0.00641657	0.0513326	0.0439029	281631/281052	2
bta05417	Lipid and atherosclerosis	2021-03-01	239/8995	0.0172989	0.123014	0.10521	281631/281052/282871	3
bta04610	Complement and coagulation cascades	2021-02-01	93/8995	0.0195467	0.125099	0.106992	282522/514076	2
bta04670	Leukocyte transendothelial migration	2021-02-01	115/8995	0.029045	0.168989	0.14453	282871/404122	2
bta05418	Fluid shear stress and atherosclerosis	2021-02-01	145/8995	0.044368	0.236629	0.20238	282871/404122	2
bta00360	Phenylalanine metabolism	2021-01-01	24/8995	0.0546202	0.26131	0.223489	789307	1
bta04145	Phagosome	2021-02-01	172/8995	0.0602001	0.26131	0.223489	281052/404122	2
bta04977	Vitamin digestion and absorption	2021-01-01	27/8995	0.0612445	0.26131	0.223489	281631	1
bta00410	beta-Alanine metabolism	2021-01-01	33/8995	0.0743606	0.266856	0.228233	789307	1
bta05205	Proteoglycans in cancer	2021-02-01	204/8995	0.0810932	0.266856	0.228233	282871/404122	2
bta00350	Tyrosine metabolism	2021-01-01	39/8995	0.0873021	0.266856	0.228233	789307	1
bta05415	Diabetic cardiomyopathy	2021-02-01	215/8995	0.0887405	0.266856	0.228233	281052/282871	2
bta04015	Rap1 signaling pathway	2021-02-01	217/8995	0.0901542	0.266856	0.228233	513895/404122	2
bta04810	Regulation of actin cytoskeleton	2021-02-01	217/8995	0.0901542	0.266856	0.228233	513895/404122	2
bta05219	Bladder cancer	2021-01-01	43/8995	0.0958338	0.266856	0.228233	282871	1
bta05143	African trypanosomiasis	2021-01-01	44/8995	0.0979549	0.266856	0.228233	281631	1
bta00260	Glycine, serine and threonine metabolism	2021-01-01	45/8995	0.100071	0.266856	0.228233	789307	1
bta05132	Salmonella infection	2021-02-01	261/8995	0.122864	0.309533	0.264732	513895/404122	2
bta05144	Malaria	2021-01-01	61/8995	0.133295	0.309533	0.264732	281052	1
bta05206	MicroRNAs in cancer	2021-02-01	293/8995	0.14827	0.309533	0.264732	280955/282871	2
bta04520	Adherens junction	2021-01-01	70/8995	0.151467	0.309533	0.264732	404122	1
bta04920	Adipocytokine signaling pathway	2021-01-01	72/8995	0.155456	0.309533	0.264732	281052	1
bta04918	Thyroid hormone synthesis	2021-01-01	76/8995	0.16338	0.309533	0.264732	280948	1
bta04971	Gastric acid secretion	2021-01-01	76/8995	0.16338	0.309533	0.264732	404122	1
bta05100	Bacterial invasion of epithelial cells	2021-01-01	76/8995	0.16338	0.309533	0.264732	404122	1
bta05412	Arrhythmogenic right ventricular cardiomyopathy	2021-01-01	76/8995	0.16338	0.309533	0.264732	404122	1
bta05416	Viral myocarditis	2021-01-01	78/8995	0.167315	0.309533	0.264732	404122	1
bta03018	RNA degradation	2021-01-01	79/8995	0.169276	0.309533	0.264732	540938	1
bta04512	ECM-receptor interaction	2021-01-01	89/8995	0.188646	0.324035	0.277135	281052	1
bta05410	Hypertrophic cardiomyopathy	2021-01-01	92/8995	0.194372	0.324035	0.277135	404122	1
bta01522	Endocrine resistance	2021-01-01	94/8995	0.198169	0.324035	0.277135	282871	1
bta04657	IL-17 signaling pathway	2021-01-01	95/8995	0.20006	0.324035	0.277135	282871	1
bta05215	Prostate cancer	2021-01-01	98/8995	0.20571	0.324035	0.277135	282871	1
bta05414	Dilated cardiomyopathy	2021-01-01	99/8995	0.207585	0.324035	0.277135	404122	1
bta05014	Amyotrophic lateral sclerosis	2021-02-01	384/8995	0.225273	0.331537	0.283551	513895/404122	2
bta04640	Hematopoietic cell lineage	2021-01-01	110/8995	0.227931	0.331537	0.283551	281052	1
bta04931	Insulin resistance	2021-01-01	110/8995	0.227931	0.331537	0.283551	281052	1
bta04611	Platelet activation	2021-01-01	121/8995	0.24778	0.337478	0.288632	404122	1
bta04919	Thyroid hormone signaling pathway	2021-01-01	121/8995	0.24778	0.337478	0.288632	404122	1
bta04152	AMPK signaling pathway	2021-01-01	123/8995	0.251336	0.337478	0.288632	281052	1
bta04668	TNF signaling pathway	2021-01-01	124/8995	0.253108	0.337478	0.288632	282871	1
bta04926	Relaxin signaling pathway	2021-01-01	131/8995	0.265401	0.346647	0.296474	282871	1
bta04915	Estrogen signaling pathway	2021-01-01	138/8995	0.277502	0.355202	0.303791	282871	1
bta04210	Apoptosis	2021-01-01	143/8995	0.286028	0.358938	0.306986	404122	1
bta04921	Oxytocin signaling pathway	2021-01-01	153/8995	0.302795	0.364742	0.311951	404122	1
bta04390	Hippo signaling pathway	2021-01-01	156/8995	0.307751	0.364742	0.311951	404122	1
bta05135	Yersinia infection	2021-01-01	156/8995	0.307751	0.364742	0.311951	404122	1
bta04514	Cell adhesion molecules	2021-01-01	163/8995	0.319186	0.371417	0.317659	282430	1
bta05225	Hepatocellular carcinoma	2021-01-01	174/8995	0.336792	0.378578	0.323784	404122	1
bta05161	Hepatitis B	2021-01-01	177/8995	0.341518	0.378578	0.323784	282871	1
bta04530	Tight junction	2021-01-01	178/8995	0.343087	0.378578	0.323784	404122	1
bta05164	Influenza A	2021-01-01	188/8995	0.358574	0.388962	0.332664	404122	1
bta04510	Focal adhesion	2021-01-01	201/8995	0.378188	0.396787	0.339358	404122	1
bta05202	Transcriptional misregulation in cancer	2021-01-01	201/8995	0.378188	0.396787	0.339358	282871	1
bta05169	Epstein-Barr virus infection	2021-01-01	235/8995	0.426822	0.440545	0.376782	280955	1
bta04714	Thermogenesis	2021-01-01	240/8995	0.433661	0.440545	0.376782	404122	1
bta05171	Coronavirus disease - COVID-19	2021-01-01	281/8995	0.486883	0.486883	0.416413	514076	1

## Sheet: ORA pathway treatment 2
ID	Description	GeneRatio	BgRatio	pvalue	p.adjust	qvalue	geneID	Count
bta04970	Salivary secretion	2028-08-01	103/8995	5.77452e-10	3.93613e-08	3.38592e-08	282165/282164/281037/112441458/282166/112443481/317650/280844	8
bta05150	Staphylococcus aureus infection	2028-08-01	108/8995	8.4648e-10	3.93613e-08	3.38592e-08	282165/282164/281037/112441458/282166/112443481/317650/514076	8
bta04613	Neutrophil extracellular trap formation	2028-08-01	253/8995	6.69317e-07	2.07488e-05	1.78485e-05	282165/282164/281037/112441458/282166/112443481/317650/404122	8
bta04621	NOD-like receptor signaling pathway	2028-07-01	192/8995	1.4656e-06	3.40752e-05	2.9312e-05	282165/282164/281037/112441458/282166/112443481/317650	7
bta05152	Tuberculosis	2028-07-01	205/8995	2.27282e-06	4.22744e-05	3.63651e-05	282165/282164/281037/112441458/282166/112443481/317650	7
bta03320	PPAR signaling pathway	2028-04-01	84/8995	0.000122148	0.0018933	0.00162864	281758/281631/408009/281052	4
bta04979	Cholesterol metabolism	2028-03-01	50/8995	0.000480106	0.00637854	0.00548692	281631/408009/281052	3
bta04610	Complement and coagulation cascades	2028-03-01	93/8995	0.00290673	0.0337907	0.0290673	280750/282522/514076	3
bta05417	Lipid and atherosclerosis	2028-04-01	239/8995	0.00602581	0.0622667	0.0535628	281631/281052/282871/415113	4
bta04975	Fat digestion and absorption	2028-02-01	52/8995	0.011256	0.10468	0.0900477	281631/281052	2
bta00010	Glycolysis / Gluconeogenesis	2028-02-01	64/8995	0.016725	0.141402	0.121636	281181/280808	2
bta05415	Diabetic cardiomyopathy	2028-03-01	215/8995	0.0284261	0.208251	0.179141	281181/281052/282871	3
bta04810	Regulation of actin cytoskeleton	2028-03-01	217/8995	0.0291104	0.208251	0.179141	513895/404122/534553	3
bta00533	Glycosaminoglycan biosynthesis - keratan sulfate	2028-01-01	15/8995	0.0457236	0.270002	0.23226	281781	1
bta05132	Salmonella infection	2028-03-01	261/8995	0.0463793	0.270002	0.23226	513895/281181/404122	3
bta01200	Carbon metabolism	2028-02-01	112/8995	0.0470694	0.270002	0.23226	281181/280808	2
bta04670	Leukocyte transendothelial migration	2028-02-01	115/8995	0.0493553	0.270002	0.23226	282871/404122	2
bta00515	Mannose type O-glycan biosynthesis	2028-01-01	23/8995	0.0692783	0.328951	0.282969	281781	1
bta03060	Protein export	2028-01-01	23/8995	0.0692783	0.328951	0.282969	415113	1
bta00360	Phenylalanine metabolism	2028-01-01	24/8995	0.0721829	0.328951	0.282969	789307	1
bta05418	Fluid shear stress and atherosclerosis	2028-02-01	145/8995	0.0742793	0.328951	0.282969	282871/404122	2
bta04977	Vitamin digestion and absorption	2028-01-01	27/8995	0.0808444	0.330347	0.28417	281631	1
bta00030	Pentose phosphate pathway	2028-01-01	28/8995	0.0837142	0.330347	0.28417	280808	1
bta00601	Glycosphingolipid biosynthesis - lacto and neolacto series	2028-01-01	30/8995	0.0894279	0.330347	0.28417	281781	1
bta00052	Galactose metabolism	2028-01-01	31/8995	0.0922719	0.330347	0.28417	281781	1
bta00500	Starch and sucrose metabolism	2028-01-01	32/8995	0.0951072	0.330347	0.28417	280808	1
bta00410	beta-Alanine metabolism	2028-01-01	33/8995	0.0979341	0.330347	0.28417	789307	1
bta04145	Phagosome	2028-02-01	172/8995	0.0994593	0.330347	0.28417	281052/404122	2
bta00350	Tyrosine metabolism	2028-01-01	39/8995	0.114717	0.340787	0.29315	789307	1
bta05014	Amyotrophic lateral sclerosis	2028-03-01	384/8995	0.115337	0.340787	0.29315	513895/404122/415113	3
bta00513	Various types of N-glycan biosynthesis	2028-01-01	43/8995	0.125738	0.340787	0.29315	281781	1
bta05219	Bladder cancer	2028-01-01	43/8995	0.125738	0.340787	0.29315	282871	1
bta05143	African trypanosomiasis	2028-01-01	44/8995	0.128473	0.340787	0.29315	281631	1
bta00260	Glycine, serine and threonine metabolism	2028-01-01	45/8995	0.131199	0.340787	0.29315	789307	1
bta00514	Other types of O-glycan biosynthesis	2028-01-01	45/8995	0.131199	0.340787	0.29315	281781	1
bta05205	Proteoglycans in cancer	2028-02-01	204/8995	0.131918	0.340787	0.29315	282871/404122	2
bta04015	Rap1 signaling pathway	2028-02-01	217/8995	0.145746	0.357821	0.307803	513895/404122	2
bta00520	Amino sugar and nucleotide sugar metabolism	2028-01-01	51/8995	0.147385	0.357821	0.307803	280808	1
bta00510	N-Glycan biosynthesis	2028-01-01	52/8995	0.150054	0.357821	0.307803	281781	1
bta05144	Malaria	2028-01-01	61/8995	0.173717	0.384548	0.330794	281052	1
bta04137	Mitophagy - animal	2028-01-01	70/8995	0.196744	0.384548	0.330794	615199	1
bta04520	Adherens junction	2028-01-01	70/8995	0.196744	0.384548	0.330794	404122	1
bta05012	Parkinson disease	2028-02-01	263/8995	0.196805	0.384548	0.330794	615199/415113	2
bta04920	Adipocytokine signaling pathway	2028-01-01	72/8995	0.201776	0.384548	0.330794	281052	1
bta01230	Biosynthesis of amino acids	2028-01-01	73/8995	0.204281	0.384548	0.330794	281181	1
bta04918	Thyroid hormone synthesis	2028-01-01	76/8995	0.21175	0.384548	0.330794	415113	1
bta04971	Gastric acid secretion	2028-01-01	76/8995	0.21175	0.384548	0.330794	404122	1
bta05100	Bacterial invasion of epithelial cells	2028-01-01	76/8995	0.21175	0.384548	0.330794	404122	1
bta05412	Arrhythmogenic right ventricular cardiomyopathy	2028-01-01	76/8995	0.21175	0.384548	0.330794	404122	1
bta05133	Pertussis	2028-01-01	78/8995	0.216692	0.384548	0.330794	534553	1
bta05416	Viral myocarditis	2028-01-01	78/8995	0.216692	0.384548	0.330794	404122	1
bta05171	Coronavirus disease - COVID-19	2028-02-01	281/8995	0.21742	0.384548	0.330794	615199/514076	2
bta03018	RNA degradation	2028-01-01	79/8995	0.219151	0.384548	0.330794	540938	1
bta05206	MicroRNAs in cancer	2028-02-01	293/8995	0.231289	0.398331	0.342651	280955/282871	2
bta04512	ECM-receptor interaction	2028-01-01	89/8995	0.243342	0.400213	0.344269	281052	1
bta04612	Antigen processing and presentation	2028-01-01	91/8995	0.248092	0.400213	0.344269	415113	1
bta05410	Hypertrophic cardiomyopathy	2028-01-01	92/8995	0.250457	0.400213	0.344269	404122	1
bta01522	Endocrine resistance	2028-01-01	94/8995	0.255164	0.400213	0.344269	282871	1
bta04657	IL-17 signaling pathway	2028-01-01	95/8995	0.257507	0.400213	0.344269	282871	1
bta04666	Fc gamma R-mediated phagocytosis	2028-01-01	96/8995	0.259843	0.400213	0.344269	534553	1
bta05215	Prostate cancer	2028-01-01	98/8995	0.264494	0.400213	0.344269	282871	1
bta05414	Dilated cardiomyopathy	2028-01-01	99/8995	0.266808	0.400213	0.344269	404122	1
bta04066	HIF-1 signaling pathway	2028-01-01	110/8995	0.291811	0.417515	0.359152	281181	1
bta04640	Hematopoietic cell lineage	2028-01-01	110/8995	0.291811	0.417515	0.359152	281052	1
bta04931	Insulin resistance	2028-01-01	110/8995	0.291811	0.417515	0.359152	281052	1
bta04611	Platelet activation	2028-01-01	121/8995	0.315991	0.434601	0.37385	404122	1
bta04919	Thyroid hormone signaling pathway	2028-01-01	121/8995	0.315991	0.434601	0.37385	404122	1
bta04152	AMPK signaling pathway	2028-01-01	123/8995	0.320301	0.434601	0.37385	281052	1
bta04668	TNF signaling pathway	2028-01-01	124/8995	0.322446	0.434601	0.37385	282871	1
bta04926	Relaxin signaling pathway	2028-01-01	131/8995	0.33728	0.448101	0.385463	282871	1
bta04915	Estrogen signaling pathway	2028-01-01	138/8995	0.351801	0.46081	0.396395	282871	1
bta04210	Apoptosis	2028-01-01	143/8995	0.361985	0.467563	0.402205	404122	1
bta04120	Ubiquitin mediated proteolysis	2028-01-01	148/8995	0.372014	0.473935	0.407686	615199	1
bta04921	Oxytocin signaling pathway	2028-01-01	153/8995	0.381891	0.474478	0.408153	404122	1
bta04390	Hippo signaling pathway	2028-01-01	156/8995	0.387745	0.474478	0.408153	404122	1
bta05135	Yersinia infection	2028-01-01	156/8995	0.387745	0.474478	0.408153	404122	1
bta04514	Cell adhesion molecules	2028-01-01	163/8995	0.401198	0.482799	0.415311	282430	1
bta03010	Ribosome	2028-01-01	168/8995	0.410632	0.482799	0.415311	615199	1
bta04141	Protein processing in endoplasmic reticulum	2028-01-01	172/8995	0.418076	0.482799	0.415311	415113	1
bta05225	Hepatocellular carcinoma	2028-01-01	174/8995	0.421763	0.482799	0.415311	404122	1
bta05161	Hepatitis B	2028-01-01	177/8995	0.427253	0.482799	0.415311	282871	1
bta04530	Tight junction	2028-01-01	178/8995	0.429072	0.482799	0.415311	404122	1
bta04360	Axon guidance	2028-01-01	179/8995	0.430885	0.482799	0.415311	534553	1
bta05164	Influenza A	2028-01-01	188/8995	0.446955	0.494843	0.425671	404122	1
bta05022	Pathways of neurodegeneration - multiple diseases	2028-02-01	490/8995	0.455729	0.498621	0.428922	615199/415113	2
bta04510	Focal adhesion	2028-01-01	201/8995	0.469396	0.501769	0.431629	404122	1
bta05202	Transcriptional misregulation in cancer	2028-01-01	201/8995	0.469396	0.501769	0.431629	282871	1
bta05167	Kaposi sarcoma-associated herpesvirus infection	2028-01-01	220/8995	0.500623	0.529068	0.455112	615199	1
bta05169	Epstein-Barr virus infection	2028-01-01	235/8995	0.524017	0.546317	0.46995	280955	1
bta04714	Thermogenesis	2028-01-01	240/8995	0.531577	0.546317	0.46995	404122	1
bta05170	Human immunodeficiency virus 1 infection	2028-01-01	242/8995	0.534569	0.546317	0.46995	534553	1
bta05020	Prion disease	2028-01-01	282/8995	0.590672	0.597092	0.513628	415113	1
bta05010	Alzheimer disease	2028-01-01	385/8995	0.70675	0.70675	0.607957	281181	1

## Sheet: ORA pathway treatment 3
ID	Description	GeneRatio	BgRatio	pvalue	p.adjust	qvalue	geneID	Count
bta04970	Salivary secretion	1959-11-01	103/8995	4.5691e-11	6.44243e-09	4.18433e-09	282165/281037/112441458/282164/282166/112443481/317650/100297344/617095/520277/280844	11
bta05152	Tuberculosis	1959-12-01	205/8995	6.22386e-09	4.38782e-07	2.84987e-07	282165/281037/112441458/282164/327711/282166/112443481/317650/100297344/617095/520277/282196	12
bta04530	Tight junction	1959-11-01	178/8995	1.64151e-08	7.71509e-07	5.01092e-07	522269/281574/281341/281597/404122/540426/514902/524770/540838/505242/506596	11
bta05150	Staphylococcus aureus infection	1959-09-01	108/8995	2.82254e-08	9.94946e-07	6.46213e-07	282165/281037/112441458/282164/282166/112443481/317650/514076/515440	9
bta04621	NOD-like receptor signaling pathway	1959-10-01	192/8995	3.93455e-07	1.10954e-05	7.20643e-06	280950/282165/281037/112441458/282164/282166/112443481/317650/282125/281832	10
bta04810	Regulation of actin cytoskeleton	1959-10-01	217/8995	1.21345e-06	2.85162e-05	1.85212e-05	522269/513895/281574/281597/404122/540426/524770/540838/506596/534553	10
bta05418	Fluid shear stress and atherosclerosis	1959-08-01	145/8995	4.16121e-06	8.38186e-05	5.44399e-05	280950/282871/100297344/617095/520277/404122/615785/281832	8
bta04670	Leukocyte transendothelial migration	1959-07-01	115/8995	9.15716e-06	0.000161395	0.000104825	522269/281574/282871/404122/540426/514902/524770	7
bta05417	Lipid and atherosclerosis	1959-09-01	239/8995	2.23945e-05	0.000350848	0.000227874	281631/281831/281052/282871/100297344/617095/520277/415113/281832	9
bta04613	Neutrophil extracellular trap formation	1959-09-01	253/8995	3.51162e-05	0.000462191	0.000300191	282691/282165/281037/112441458/282164/282166/112443481/317650/404122	9
bta04666	Fc gamma R-mediated phagocytosis	1959-06-01	96/8995	3.60574e-05	0.000462191	0.000300191	281597/539555/514902/540838/506596/534553	6
bta04922	Glucagon signaling pathway	1959-06-01	103/8995	5.36783e-05	0.00063072	0.00040965	100297344/617095/520277/505472/404148/281275	6
bta04971	Gastric acid secretion	1959-05-01	76/8995	0.000132226	0.00143415	0.000931474	281574/100297344/617095/520277/404122	5
bta05133	Pertussis	1959-05-01	78/8995	0.000149591	0.0015066	0.000978531	100297344/617095/520277/515440/534553	5
bta04915	Estrogen signaling pathway	1959-06-01	138/8995	0.000270234	0.00244667	0.00158911	281831/282871/100297344/617095/520277/281832	6
bta05132	Salmonella infection	1959-08-01	261/8995	0.000277637	0.00244667	0.00158911	280950/513895/281181/281597/404122/540838/506596/281832	8
bta04979	Cholesterol metabolism	1959-04-01	50/8995	0.000307025	0.0025465	0.00165394	281631/408009/281052/280815	4
bta04744	Phototransduction	1959-03-01	28/8995	0.000781534	0.00587134	0.00381341	100297344/617095/520277	3
bta00010	Glycolysis / Gluconeogenesis	1959-04-01	64/8995	0.000791174	0.00587134	0.00381341	281181/404148/280808/281275	4
bta04114	Oocyte meiosis	1959-05-01	119/8995	0.00105467	0.00743543	0.00482928	100297344/617095/520277/282125/768311	5
bta05100	Bacterial invasion of epithelial cells	1959-04-01	76/8995	0.00150695	0.0101181	0.00657164	281597/404122/540838/506596	4
bta03320	PPAR signaling pathway	1959-04-01	84/8995	0.00217991	0.0139713	0.00907428	281758/281631/408009/281052	4
bta04015	Rap1 signaling pathway	1959-06-01	217/8995	0.00285494	0.017147	0.0111369	513895/100297344/617095/520277/404122/514902	6
bta04612	Antigen processing and presentation	1959-04-01	91/8995	0.00291864	0.017147	0.0111369	281831/327711/415113/281832	4
bta04921	Oxytocin signaling pathway	1959-05-01	153/8995	0.0031889	0.0179854	0.0116814	281341/100297344/617095/520277/404122	5
bta04722	Neurotrophin signaling pathway	1959-04-01	122/8995	0.00825495	0.0447672	0.0290761	100297344/617095/520277/282125	4
bta04720	Long-term potentiation	1959-03-01	69/8995	0.0103372	0.050527	0.0328171	100297344/617095/520277	3
bta05031	Amphetamine addiction	1959-03-01	69/8995	0.0103372	0.050527	0.0328171	100297344/617095/520277	3
bta05205	Proteoglycans in cancer	1959-05-01	204/8995	0.0106096	0.050527	0.0328171	281574/282871/404122/540426/615785	5
bta04520	Adherens junction	1959-03-01	70/8995	0.0107504	0.050527	0.0328171	522269/404122/524770	3
bta04924	Renin secretion	1959-03-01	73/8995	0.0120471	0.054795	0.0355891	100297344/617095/520277	3
bta04910	Insulin signaling pathway	1959-04-01	138/8995	0.0125831	0.0550913	0.0357816	100297344/617095/520277/505472	4
bta04270	Vascular smooth muscle contraction	1959-04-01	139/8995	0.0128937	0.0550913	0.0357816	281341/100297344/617095/520277	4
bta05214	Glioma	1959-03-01	77/8995	0.0139105	0.0576876	0.0374679	100297344/617095/520277	3
bta00500	Starch and sucrose metabolism	1959-02-01	32/8995	0.0184927	0.0741802	0.0481798	505472/280808	2
bta05135	Yersinia infection	1959-04-01	156/8995	0.0189396	0.0741802	0.0481798	281597/404122/540838/506596	4
bta04610	Complement and coagulation cascades	1959-03-01	93/8995	0.0229298	0.083366	0.0541459	282522/514076/515440	3
bta04912	GnRH signaling pathway	1959-03-01	93/8995	0.0229298	0.083366	0.0541459	100297344/617095/520277	3
bta04144	Endocytosis	1959-05-01	251/8995	0.0239436	0.083366	0.0541459	534656/281831/281597/540838/506596	5
bta04925	Aldosterone synthesis and secretion	1959-03-01	96/8995	0.0249028	0.083366	0.0541459	100297344/617095/520277	3
bta04022	cGMP-PKG signaling pathway	1959-04-01	171/8995	0.025532	0.083366	0.0541459	100297344/617095/520277/514902	4
bta04070	Phosphatidylinositol signaling system	1959-03-01	97/8995	0.0255802	0.083366	0.0541459	100297344/617095/520277	3
bta04141	Protein processing in endoplasmic reticulum	1959-04-01	172/8995	0.0260149	0.083366	0.0541459	281831/415113/520650/281832	4
bta04145	Phagosome	1959-04-01	172/8995	0.0260149	0.083366	0.0541459	327711/281052/404122/282196	4
bta04713	Circadian entrainment	1959-03-01	101/8995	0.0283892	0.0873484	0.0567324	100297344/617095/520277	3
bta05012	Parkinson disease	1959-05-01	263/8995	0.0285594	0.0873484	0.0567324	280950/100297344/617095/520277/415113	5
bta04916	Melanogenesis	1959-03-01	102/8995	0.0291161	0.0873484	0.0567324	100297344/617095/520277	3
bta04625	C-type lectin receptor signaling pathway	1959-03-01	105/8995	0.0313562	0.0921087	0.0598243	100297344/617095/520277	3
bta00260	Glycine, serine and threonine metabolism	1959-02-01	45/8995	0.0349657	0.0995065	0.0646291	789307/404148	2
bta04750	Inflammatory mediator regulation of TRP channels	1959-03-01	110/8995	0.035286	0.0995065	0.0646291	100297344/617095/520277	3
bta01200	Carbon metabolism	1959-03-01	112/8995	0.0369263	0.10209	0.0663072	281181/404148/280808	3
bta05146	Amoebiasis	1959-03-01	117/8995	0.0411964	0.111706	0.0725523	522269/524770/516099	3
bta04510	Focal adhesion	1959-04-01	201/8995	0.0424532	0.112941	0.073355	522269/404122/514902/524770	4
bta04975	Fat digestion and absorption	1959-02-01	52/8995	0.0454938	0.118789	0.0771532	281631/281052	2
bta05134	Legionellosis	1959-02-01	59/8995	0.0570299	0.144736	0.0940057	281831/282220	2
bta04728	Dopaminergic synapse	1959-03-01	134/8995	0.0574839	0.144736	0.0940057	100297344/617095/520277	3
bta05144	Malaria	1959-02-01	61/8995	0.0604957	0.149647	0.0971952	281052/615785	2
bta04371	Apelin signaling pathway	1959-03-01	140/8995	0.0638637	0.155255	0.100837	100297344/617095/520277	3
bta05230	Central carbon metabolism in cancer	1959-02-01	68/8995	0.073169	0.173427	0.11264	404148/281275	2
bta05170	Human immunodeficiency virus 1 infection	1959-04-01	242/8995	0.0737986	0.173427	0.11264	100297344/617095/520277/534553	4
bta04261	Adrenergic signaling in cardiomyocytes	1959-03-01	150/8995	0.0751931	0.173807	0.112887	100297344/617095/520277	3
bta05203	Viral carcinogenesis	1959-04-01	249/8995	0.0800792	0.182116	0.118283	522269/282125/524770/768311	4
bta04390	Hippo signaling pathway	1959-03-01	156/8995	0.0823926	0.182195	0.118335	282125/404122/768311	3
bta01230	Biosynthesis of amino acids	1959-02-01	73/8995	0.0826984	0.182195	0.118335	281181/404148	2
bta05140	Leishmaniasis	1959-02-01	78/8995	0.0925866	0.20024	0.130055	282220/539555	2
bta04218	Cellular senescence	1959-03-01	165/8995	0.0937294	0.20024	0.130055	100297344/617095/520277	3
bta04217	Necroptosis	1959-03-01	185/8995	0.121054	0.254755	0.165462	282691/505472/281832	3
bta04657	IL-17 signaling pathway	1959-02-01	95/8995	0.128469	0.266384	0.173015	282871/281832	2
bta05215	Prostate cancer	1959-02-01	98/8995	0.135106	0.276086	0.179317	282871/281832	2
bta03060	Protein export	1959-01-01	23/8995	0.14062	0.28325	0.18397	415113	1
bta00360	Phenylalanine metabolism	1959-01-01	24/8995	0.146272	0.289562	0.188069	789307	1
bta05322	Systemic lupus erythematosus	1959-03-01	203/8995	0.147861	0.289562	0.188069	522269/524770/515440	3
bta04066	HIF-1 signaling pathway	1959-02-01	110/8995	0.162369	0.306454	0.19904	281181/281275	2
bta04931	Insulin resistance	1959-02-01	110/8995	0.162369	0.306454	0.19904	281052/505472	2
bta04977	Vitamin digestion and absorption	1959-01-01	27/8995	0.163007	0.306454	0.19904	281631	1
bta05415	Diabetic cardiomyopathy	1959-03-01	215/8995	0.166728	0.308577	0.20042	281181/281052/282871	3
bta00030	Pentose phosphate pathway	1959-01-01	28/8995	0.168514	0.308577	0.20042	280808	1
bta05167	Kaposi sarcoma-associated herpesvirus infection	1959-03-01	220/8995	0.174795	0.315976	0.205225	100297344/617095/520277	3
bta04611	Platelet activation	1959-02-01	121/8995	0.188159	0.332143	0.215725	404122/514902	2
bta04110	Cell cycle	1959-02-01	123/8995	0.192912	0.332143	0.215725	282125/768311	2
bta00410	beta-Alanine metabolism	1959-01-01	33/8995	0.195517	0.332143	0.215725	789307	1
bta00640	Propanoate metabolism	1959-01-01	33/8995	0.195517	0.332143	0.215725	281275	1
bta03410	Base excision repair	1959-01-01	33/8995	0.195517	0.332143	0.215725	282691	1
bta04024	cAMP signaling pathway	1959-03-01	241/8995	0.209807	0.352177	0.228737	100297344/617095/520277	3
bta04014	Ras signaling pathway	1959-03-01	243/8995	0.213225	0.353703	0.229729	100297344/617095/520277	3
bta04142	Lysosome	1959-02-01	133/8995	0.216897	0.353918	0.229869	327711/280815	2
bta05034	Alcoholism	1959-03-01	246/8995	0.218375	0.353918	0.229869	100297344/617095/520277	3
bta00350	Tyrosine metabolism	1959-01-01	39/8995	0.226784	0.358382	0.232768	789307	1
bta05163	Human cytomegalovirus infection	1959-03-01	251/8995	0.227018	0.358382	0.232768	100297344/617095/520277	3
bta04020	Calcium signaling pathway	1959-03-01	252/8995	0.228755	0.358382	0.232768	100297344/617095/520277	3
bta04210	Apoptosis	1959-02-01	143/8995	0.241147	0.373645	0.242681	327711/404122	2
bta05010	Alzheimer disease	1959-04-01	385/8995	0.245176	0.37391	0.242853	281181/100297344/617095/520277	4
bta05219	Bladder cancer	1959-01-01	43/8995	0.246962	0.37391	0.242853	282871	1
bta00620	Pyruvate metabolism	1959-01-01	44/8995	0.251925	0.37391	0.242853	281275	1
bta05143	African trypanosomiasis	1959-01-01	44/8995	0.251925	0.37391	0.242853	281631	1
bta00270	Cysteine and methionine metabolism	1959-01-01	50/8995	0.281035	0.410827	0.26683	281275	1
bta05162	Measles	1959-02-01	160/8995	0.282626	0.410827	0.26683	281831/540426	2
bta00520	Amino sugar and nucleotide sugar metabolism	1959-01-01	51/8995	0.285777	0.411169	0.267053	280808	1
bta04514	Cell adhesion molecules	1959-02-01	163/8995	0.289945	0.412952	0.268211	282430/615785	2
bta05206	MicroRNAs in cancer	1959-03-01	293/8995	0.301701	0.425398	0.276295	281574/280955/282871	3
bta05160	Hepatitis C	1959-02-01	172/8995	0.311851	0.435356	0.282762	282125/768311	2
bta04370	VEGF signaling pathway	1959-01-01	58/8995	0.318123	0.439758	0.285621	516099	1
bta05161	Hepatitis B	1959-02-01	177/8995	0.32397	0.443493	0.288047	282871/768311	2
bta00480	Glutathione metabolism	1959-01-01	61/8995	0.33154	0.449492	0.291943	282438	1
bta04213	Longevity regulating pathway - multiple species	1959-01-01	62/8995	0.335954	0.451139	0.293013	281831	1
bta04920	Adipocytokine signaling pathway	1959-01-01	72/8995	0.378553	0.503547	0.327052	281052	1
bta04918	Thyroid hormone synthesis	1959-01-01	76/8995	0.394829	0.515472	0.334797	415113	1
bta05412	Arrhythmogenic right ventricular cardiomyopathy	1959-01-01	76/8995	0.394829	0.515472	0.334797	404122	1
bta05022	Pathways of neurodegeneration - multiple diseases	1959-04-01	490/8995	0.402014	0.516329	0.335354	100297344/617095/520277/415113	4
bta05416	Viral myocarditis	1959-01-01	78/8995	0.40281	0.516329	0.335354	404122	1
bta03018	RNA degradation	1959-01-01	79/8995	0.406761	0.516697	0.335593	540938	1
bta04146	Peroxisome	1959-01-01	84/8995	0.426136	0.536475	0.348438	282885	1
bta04914	Progesterone-mediated oocyte maturation	1959-01-01	88/8995	0.441186	0.550256	0.357389	281832	1
bta04512	ECM-receptor interaction	1959-01-01	89/8995	0.444888	0.550256	0.357389	281052	1
bta04151	PI3K-Akt signaling pathway	1959-03-01	379/8995	0.455642	0.554092	0.35988	282125/768311/281832	3
bta05410	Hypertrophic cardiomyopathy	1959-01-01	92/8995	0.455849	0.554092	0.35988	404122	1
bta01522	Endocrine resistance	1959-01-01	94/8995	0.463037	0.554774	0.360323	282871	1
bta05014	Amyotrophic lateral sclerosis	1959-03-01	384/8995	0.464279	0.554774	0.360323	513895/404122/415113	3
bta05414	Dilated cardiomyopathy	1959-01-01	99/8995	0.480603	0.569454	0.369858	404122	1
bta04928	Parathyroid hormone synthesis, secretion and action	1959-01-01	105/8995	0.500937	0.588601	0.382294	505242	1
bta04640	Hematopoietic cell lineage	1959-01-01	110/8995	0.517283	0.602785	0.391506	281052	1
bta05145	Toxoplasmosis	1959-01-01	114/8995	0.52998	0.611117	0.396918	281831	1
bta04659	Th17 cell differentiation	1959-01-01	115/8995	0.533102	0.611117	0.396918	281832	1
bta04919	Thyroid hormone signaling pathway	1959-01-01	121/8995	0.551414	0.617209	0.400875	404122	1
bta05171	Coronavirus disease - COVID-19	1959-02-01	281/8995	0.554572	0.617209	0.400875	514076/515440	2
bta05020	Prion disease	1959-02-01	282/8995	0.55652	0.617209	0.400875	281831/415113	2
bta04152	AMPK signaling pathway	1959-01-01	123/8995	0.557359	0.617209	0.400875	281052	1
bta04668	TNF signaling pathway	1959-01-01	124/8995	0.560303	0.617209	0.400875	282871	1
bta04010	MAPK signaling pathway	1959-02-01	292/8995	0.575675	0.629226	0.40868	281831/516099	2
bta04926	Relaxin signaling pathway	1959-01-01	131/8995	0.580376	0.629485	0.408848	282871	1
bta04140	Autophagy - animal	1959-01-01	142/8995	0.610114	0.656688	0.426516	282691	1
bta03040	Spliceosome	1959-01-01	153/8995	0.637777	0.681262	0.442477	281831	1
bta05225	Hepatocellular carcinoma	1959-01-01	174/8995	0.685337	0.72656	0.471898	404122	1
bta04360	Axon guidance	1959-01-01	179/8995	0.695723	0.732066	0.475474	534553	1
bta05164	Influenza A	1959-01-01	188/8995	0.713575	0.741798	0.481795	404122	1
bta03013	RNA transport	1959-01-01	189/8995	0.715493	0.741798	0.481795	282220	1
bta05202	Transcriptional misregulation in cancer	1959-01-01	201/8995	0.737556	0.759091	0.493027	282871	1
bta05207	Chemical carcinogenesis - receptor activation	1959-01-01	216/8995	0.762782	0.779364	0.506194	281832	1
bta05169	Epstein-Barr virus infection	1959-01-01	235/8995	0.791336	0.802722	0.521365	280955	1
bta04714	Thermogenesis	1959-01-01	240/8995	0.798271	0.803972	0.522177	404122	1
bta05165	Human papillomavirus infection	1959-01-01	352/8995	0.905864	0.905864	0.588355	505242	1

## Sheet: ORA pathway treatment 4
ID	Description	GeneRatio	BgRatio	pvalue	p.adjust	qvalue	geneID	Count
bta04970	Salivary secretion	1979-12-01	103/8995	7.17012e-11	1.06118e-08	7.2456e-09	281102/282165/282164/112441458/281037/282166/112443481/317650/100297344/520277/617095/280844	12
bta04530	Tight junction	14/79	178/8995	3.43295e-10	2.54038e-08	1.73454e-08	614055/522269/281574/281341/281597/404122/539459/540426/514902/524770/540838/505242/506596/504244	14
bta05152	Tuberculosis	1979-12-01	205/8995	1.90842e-07	9.41489e-06	6.42837e-06	282165/282164/112441458/281037/327711/282166/112443481/317650/100297344/520277/617095/282196	12
bta04810	Regulation of actin cytoskeleton	1979-12-01	217/8995	3.53795e-07	1.12122e-05	7.65558e-06	614055/522269/513895/281574/281597/404122/539459/540426/524770/540838/506596/534553	12
bta05150	Staphylococcus aureus infection	1979-09-01	108/8995	3.78792e-07	1.12122e-05	7.65558e-06	282165/282164/112441458/281037/282166/112443481/317650/514076/515440	9
bta04621	NOD-like receptor signaling pathway	1979-11-01	192/8995	8.02506e-07	1.97951e-05	1.35159e-05	280950/281105/282165/282164/112441458/281037/282166/112443481/317650/282125/281832	11
bta05132	Salmonella infection	1979-12-01	261/8995	2.51309e-06	5.3134e-05	3.62793e-05	614055/280950/513895/281181/281597/404122/539459/615087/540838/506596/504244/281832	12
bta04666	Fc gamma R-mediated phagocytosis	1979-07-01	96/8995	1.95991e-05	0.000362584	0.000247568	281597/539555/539459/514902/540838/506596/534553	7
bta04922	Glucagon signaling pathway	1979-07-01	103/8995	3.10177e-05	0.000510069	0.000348269	281274/100297344/520277/617095/505472/404148/281275	7
bta04670	Leukocyte transendothelial migration	1979-07-01	115/8995	6.30501e-05	0.000933142	0.000637138	614055/522269/281574/404122/540426/514902/524770	7
bta04612	Antigen processing and presentation	1979-06-01	91/8995	0.000139516	0.00187713	0.00128168	281105/281831/327711/282254/509857/281832	6
bta00010	Glycolysis / Gluconeogenesis	1979-05-01	64/8995	0.000233866	0.00288435	0.0019694	281181/281274/404148/280808/281275	5
bta05418	Fluid shear stress and atherosclerosis	1979-07-01	145/8995	0.000269151	0.00306418	0.00209219	280950/100297344/520277/617095/404122/615785/281832	7
bta04613	Neutrophil extracellular trap formation	1979-09-01	253/8995	0.000352617	0.00372766	0.0025452	282691/282165/282164/112441458/281037/282166/112443481/317650/404122	9
bta04971	Gastric acid secretion	1979-05-01	76/8995	0.00052207	0.00482914	0.00329728	281574/100297344/520277/617095/404122	5
bta05100	Bacterial invasion of epithelial cells	1979-05-01	76/8995	0.00052207	0.00482914	0.00329728	281597/404122/539459/540838/506596	5
bta05133	Pertussis	1979-05-01	78/8995	0.000588477	0.0049169	0.0033572	100297344/520277/617095/515440/534553	5
bta04114	Oocyte meiosis	1979-06-01	119/8995	0.000598001	0.0049169	0.0033572	100297344/520277/617095/282125/287022/768311	6
bta05417	Lipid and atherosclerosis	1979-08-01	239/8995	0.00113371	0.00883098	0.00602969	281631/281831/281052/100297344/520277/617095/282254/281832	8
bta04915	Estrogen signaling pathway	1979-06-01	138/8995	0.001298	0.00960517	0.0065583	281831/100297344/520277/617095/282254/281832	6
bta04744	Phototransduction	1979-03-01	28/8995	0.00182364	0.0128523	0.0087754	100297344/520277/617095	3
bta04921	Oxytocin signaling pathway	1979-06-01	153/8995	0.00219694	0.0147794	0.0100912	281341/100297344/520277/617095/404122/281138	6
bta04924	Renin secretion	1979-04-01	73/8995	0.00379166	0.024249	0.0165569	281105/100297344/520277/617095	4
bta04145	Phagosome	1979-06-01	172/8995	0.00393227	0.024249	0.0165569	327711/281052/404122/615087/504244/282196	6
bta03320	PPAR signaling pathway	1979-04-01	84/8995	0.00625142	0.0362106	0.0247242	281758/281631/281052/281760	4
bta04144	Endocytosis	1979-07-01	251/8995	0.00636132	0.0362106	0.0247242	534656/281831/281597/539459/282254/540838/506596	7
bta00270	Cysteine and methionine metabolism	1979-03-01	50/8995	0.00950278	0.0520893	0.035566	281274/508158/281275	3
bta00730	Thiamine metabolism	1979-02-01	18/8995	0.0106383	0.0562311	0.0383939	280716/280994	2
bta05135	Yersinia infection	1979-05-01	156/8995	0.0118471	0.0584505	0.0399093	281597/404122/539459/540838/506596	5
bta04015	Rap1 signaling pathway	1979-06-01	217/8995	0.0118481	0.0584505	0.0399093	513895/100297344/520277/617095/404122/514902	6
bta05134	Legionellosis	1979-03-01	59/8995	0.0149003	0.071137	0.0485715	281831/282220/282254	3
bta00360	Phenylalanine metabolism	1979-02-01	24/8995	0.0185503	0.0857953	0.05858	280858/789307	2
bta05146	Amoebiasis	1979-04-01	117/8995	0.0193455	0.0867616	0.0592398	522269/524770/516099/281997	4
bta05230	Central carbon metabolism in cancer	1979-03-01	68/8995	0.0217195	0.0878896	0.06001	281274/404148/281275	3
bta05203	Viral carcinogenesis	1979-06-01	249/8995	0.0219133	0.0878896	0.06001	522269/282125/287022/524770/768311/528135	6
bta04722	Neurotrophin signaling pathway	1979-04-01	122/8995	0.0221837	0.0878896	0.06001	100297344/520277/617095/282125	4
bta04720	Long-term potentiation	1979-03-01	69/8995	0.0225662	0.0878896	0.06001	100297344/520277/617095	3
bta05031	Amphetamine addiction	1979-03-01	69/8995	0.0225662	0.0878896	0.06001	100297344/520277/617095	3
bta04520	Adherens junction	1979-03-01	70/8995	0.0234308	0.0889168	0.0607114	522269/404122/524770	3
bta05012	Parkinson disease	1979-06-01	263/8995	0.0277386	0.102633	0.0700764	280950/100297344/520277/617095/615087/504244	6
bta05214	Glioma	1979-03-01	77/8995	0.0299818	0.108227	0.0738961	100297344/520277/617095	3
bta04510	Focal adhesion	1979-05-01	201/8995	0.0315472	0.108538	0.0741087	614055/522269/404122/514902/524770	5
bta00500	Starch and sucrose metabolism	1979-02-01	32/8995	0.0318687	0.108538	0.0741087	505472/280808	2
bta04910	Insulin signaling pathway	1979-04-01	138/8995	0.0329157	0.108538	0.0741087	100297344/520277/617095/505472	4
bta04270	Vascular smooth muscle contraction	1979-04-01	139/8995	0.0336716	0.108538	0.0741087	281341/100297344/520277/617095	4
bta00640	Propanoate metabolism	1979-02-01	33/8995	0.0337349	0.108538	0.0741087	281274/281275	2
bta04210	Apoptosis	1979-04-01	143/8995	0.0367967	0.11587	0.0791149	281105/327711/404122/504244	4
bta03040	Spliceosome	1979-04-01	153/8995	0.0453221	0.137153	0.0936464	281831/282254/528135/537706	4
bta00350	Tyrosine metabolism	1979-02-01	39/8995	0.0457798	0.137153	0.0936464	280858/789307	2
bta04390	Hippo signaling pathway	1979-04-01	156/8995	0.0480786	0.137153	0.0936464	282125/287022/404122/768311	4
bta04610	Complement and coagulation cascades	1979-03-01	93/8995	0.0481889	0.137153	0.0936464	282522/514076/515440	3
bta04912	GnRH signaling pathway	1979-03-01	93/8995	0.0481889	0.137153	0.0936464	100297344/520277/617095	3
bta04925	Aldosterone synthesis and secretion	1979-03-01	96/8995	0.0520899	0.145459	0.0993174	100297344/520277/617095	3
bta04070	Phosphatidylinositol signaling system	1979-03-01	97/8995	0.0534234	0.14642	0.0999737	100297344/520277/617095	3
bta00620	Pyruvate metabolism	1979-02-01	44/8995	0.0568374	0.152944	0.104429	281274/281275	2
bta04713	Circadian entrainment	1979-03-01	101/8995	0.058921	0.153585	0.104866	100297344/520277/617095	3
bta00260	Glycine, serine and threonine metabolism	1979-02-01	45/8995	0.0591509	0.153585	0.104866	789307/404148	2
bta04916	Melanogenesis	1979-03-01	102/8995	0.0603358	0.15396	0.105122	100297344/520277/617095	3
bta04022	cGMP-PKG signaling pathway	1979-04-01	171/8995	0.0632287	0.158608	0.108295	100297344/520277/617095/514902	4
bta04625	C-type lectin receptor signaling pathway	1979-03-01	105/8995	0.0646756	0.159533	0.108927	100297344/520277/617095	3
bta04979	Cholesterol metabolism	1979-02-01	50/8995	0.071187	0.16966	0.115842	281631/281052	2
bta04066	HIF-1 signaling pathway	1979-03-01	110/8995	0.0722201	0.16966	0.115842	281181/281274/281275	3
bta04750	Inflammatory mediator regulation of TRP channels	1979-03-01	110/8995	0.0722201	0.16966	0.115842	100297344/520277/617095	3
bta01200	Carbon metabolism	1979-03-01	112/8995	0.0753444	0.173518	0.118476	281181/404148/280808	3
bta04975	Fat digestion and absorption	1979-02-01	52/8995	0.0762071	0.173518	0.118476	281631/281052	2
bta04611	Platelet activation	1979-03-01	121/8995	0.0901255	0.2021	0.137991	614055/404122/514902	3
bta04110	Cell cycle	1979-03-01	123/8995	0.0935648	0.20668	0.141119	282125/287022/768311	3
bta05144	Malaria	1979-02-01	61/8995	0.100076	0.217813	0.14872	281052/615785	2
bta04213	Longevity regulating pathway - multiple species	1979-02-01	62/8995	0.102845	0.22047	0.150534	281831/282254	2
bta05205	Proteoglycans in cancer	1979-04-01	204/8995	0.104276	0.22047	0.150534	281574/404122/540426/615785	4
bta04728	Dopaminergic synapse	1979-03-01	134/8995	0.113418	0.236421	0.161425	100297344/520277/617095	3
bta05014	Amyotrophic lateral sclerosis	1979-06-01	384/8995	0.120622	0.24676	0.168485	513895/404122/507564/615087/537706/504244	6
bta05010	Alzheimer disease	1979-06-01	385/8995	0.121713	0.24676	0.168485	281181/100297344/520277/617095/615087/504244	6
bta04371	Apelin signaling pathway	1979-03-01	140/8995	0.124872	0.249745	0.170523	100297344/520277/617095	3
bta01230	Biosynthesis of amino acids	1979-02-01	73/8995	0.134574	0.265559	0.181321	281181/404148	2
bta04261	Adrenergic signaling in cardiomyocytes	1979-03-01	150/8995	0.144845	0.282066	0.192592	100297344/520277/617095	3
bta05140	Leishmaniasis	1979-02-01	78/8995	0.149648	0.287636	0.196394	282220/539555	2
bta01240	Biosynthesis of cofactors	1979-03-01	154/8995	0.153117	0.290529	0.19837	280716/280994/615447	3
bta05170	Human immunodeficiency virus 1 infection	1979-04-01	242/8995	0.163113	0.305578	0.208645	100297344/520277/617095/534553	4
bta05162	Measles	1979-03-01	160/8995	0.1658	0.306729	0.209431	281831/282254/540426	3
bta04146	Peroxisome	1979-02-01	84/8995	0.168159	0.307254	0.209789	281997/282885	2
bta04218	Cellular senescence	1979-03-01	165/8995	0.176602	0.318745	0.217635	100297344/520277/617095	3
bta04141	Protein processing in endoplasmic reticulum	1979-03-01	172/8995	0.192046	0.336746	0.229926	281831/282254/281832	3
bta05160	Hepatitis C	1979-03-01	172/8995	0.192046	0.336746	0.229926	282125/287022/768311	3
bta04540	Gap junction	1979-02-01	92/8995	0.193402	0.336746	0.229926	615087/504244	2
bta04657	IL-17 signaling pathway	1979-02-01	95/8995	0.202996	0.349342	0.238527	616818/281832	2
bta04977	Vitamin digestion and absorption	1979-01-01	27/8995	0.212212	0.361003	0.246489	281631	1
bta00030	Pentose phosphate pathway	1979-01-01	28/8995	0.219151	0.368466	0.251584	280808	1
bta04217	Necroptosis	1979-03-01	185/8995	0.221577	0.368466	0.251584	282691/505472/281832	3
bta05020	Prion disease	1979-04-01	282/8995	0.23512	0.386641	0.263994	281831/282254/615087/504244	4
bta04931	Insulin resistance	1979-02-01	110/8995	0.25161	0.402551	0.274857	281052/505472	2
bta00410	beta-Alanine metabolism	1979-01-01	33/8995	0.252955	0.402551	0.274857	789307	1
bta03410	Base excision repair	1979-01-01	33/8995	0.252955	0.402551	0.274857	282691	1
bta05322	Systemic lupus erythematosus	1979-03-01	203/8995	0.263832	0.412325	0.28153	522269/524770/515440	3
bta05145	Toxoplasmosis	1979-02-01	114/8995	0.264668	0.412325	0.28153	281831/282254	2
bta00250	Alanine, aspartate and glutamate metabolism	1979-01-01	38/8995	0.285312	0.439856	0.300329	767970	1
bta00790	Folate biosynthesis	1979-01-01	39/8995	0.291616	0.444066	0.303203	280994	1
bta04152	AMPK signaling pathway	1979-02-01	123/8995	0.294044	0.444066	0.303203	281052/281138	2
bta05167	Kaposi sarcoma-associated herpesvirus infection	1979-03-01	220/8995	0.304619	0.45539	0.310935	100297344/520277/617095	3
bta05143	African trypanosomiasis	1979-01-01	44/8995	0.322319	0.477032	0.325712	281631	1
bta04142	Lysosome	1979-02-01	133/8995	0.326508	0.478447	0.326678	281105/327711	2
bta00230	Purine metabolism	1979-02-01	135/8995	0.332961	0.48312	0.329869	280716/615447	2
bta03050	Proteasome	1979-01-01	47/8995	0.340106	0.488697	0.333676	509857	1
bta04024	cAMP signaling pathway	1979-03-01	241/8995	0.355376	0.500955	0.342046	100297344/520277/617095	3
bta04140	Autophagy - animal	1979-02-01	142/8995	0.355408	0.500955	0.342046	281105/282691	2
bta04014	Ras signaling pathway	1979-03-01	243/8995	0.360202	0.502242	0.342925	100297344/520277/617095	3
bta00520	Amino sugar and nucleotide sugar metabolism	1979-01-01	51/8995	0.363108	0.502242	0.342925	280808	1
bta05034	Alcoholism	1979-03-01	246/8995	0.367432	0.503518	0.343796	100297344/520277/617095	3
bta05163	Human cytomegalovirus infection	1979-03-01	251/8995	0.379454	0.513756	0.350786	100297344/520277/617095	3
bta04020	Calcium signaling pathway	1979-03-01	252/8995	0.381853	0.513756	0.350786	100297344/520277/617095	3
bta00240	Pyrimidine metabolism	1979-01-01	55/8995	0.385317	0.513756	0.350786	615447	1
bta04370	VEGF signaling pathway	1979-01-01	58/8995	0.401471	0.530515	0.362229	516099	1
bta00480	Glutathione metabolism	1979-01-01	61/8995	0.417205	0.546427	0.373094	282438	1
bta04514	Cell adhesion molecules	1979-02-01	163/8995	0.420995	0.546556	0.373182	282430/615785	2
bta04151	PI3K-Akt signaling pathway	1979-04-01	379/8995	0.427805	0.550567	0.37592	282125/287022/768311/281832	4
bta05022	Pathways of neurodegeneration - multiple diseases	1979-05-01	490/8995	0.432075	0.551267	0.376399	100297344/520277/617095/615087/504244	5
bta00970	Aminoacyl-tRNA biosynthesis	1979-01-01	66/8995	0.442526	0.559776	0.382209	281476	1
bta05171	Coronavirus disease - COVID-19	1979-03-01	281/8995	0.450351	0.564847	0.385671	286853/514076/515440	3
bta05161	Hepatitis B	1979-02-01	177/8995	0.46285	0.574987	0.392594	287022/768311	2
bta04360	Axon guidance	1979-02-01	179/8995	0.468688	0.574987	0.392594	614055/534553	2
bta04920	Adipocytokine signaling pathway	1979-01-01	72/8995	0.471481	0.574987	0.392594	281052	1
bta04010	MAPK signaling pathway	1979-03-01	292/8995	0.475591	0.574987	0.392594	281831/282254/516099	3
bta05206	MicroRNAs in cancer	1979-03-01	293/8995	0.477861	0.574987	0.392594	281574/280955/528135	3
bta00983	Drug metabolism - other enzymes	1979-01-01	76/8995	0.489954	0.580105	0.396089	615447	1
bta05412	Arrhythmogenic right ventricular cardiomyopathy	1979-01-01	76/8995	0.489954	0.580105	0.396089	404122	1
bta03013	RNA transport	1979-02-01	189/8995	0.497318	0.581453	0.397009	282220/537706	2
bta05416	Viral myocarditis	1979-01-01	78/8995	0.49895	0.581453	0.397009	404122	1
bta03018	RNA degradation	1979-01-01	79/8995	0.503389	0.582043	0.397412	540938	1
bta04914	Progesterone-mediated oocyte maturation	1979-01-01	88/8995	0.541632	0.621256	0.424186	281832	1
bta04512	ECM-receptor interaction	1979-01-01	89/8995	0.545698	0.621256	0.424186	281052	1
bta05410	Hypertrophic cardiomyopathy	1979-01-01	92/8995	0.557682	0.630052	0.430192	404122	1
bta05415	Diabetic cardiomyopathy	1979-02-01	215/8995	0.567083	0.63582	0.434131	281181/281052	2
bta05215	Prostate cancer	1979-01-01	98/8995	0.580721	0.645505	0.440743	281832	1
bta05414	Dilated cardiomyopathy	1979-01-01	99/8995	0.584444	0.645505	0.440743	404122	1
bta03015	mRNA surveillance pathway	1979-01-01	102/8995	0.595418	0.652754	0.445693	537706	1
bta04928	Parathyroid hormone synthesis, secretion and action	1979-01-01	105/8995	0.606106	0.659586	0.450357	505242	1
bta04640	Hematopoietic cell lineage	1979-01-01	110/8995	0.623303	0.673349	0.459755	281052	1
bta04659	Th17 cell differentiation	1979-01-01	115/8995	0.639758	0.686117	0.468473	281832	1
bta04919	Thyroid hormone signaling pathway	1979-01-01	121/8995	0.65857	0.701211	0.478778	404122	1
bta03010	Ribosome	1979-01-01	168/8995	0.775975	0.814575	0.556182	286853	1
bta05016	Huntington disease	1979-02-01	319/8995	0.776047	0.814575	0.556182	615087/504244	2
bta05225	Hepatocellular carcinoma	1979-01-01	174/8995	0.787742	0.821027	0.560587	404122	1
bta05164	Influenza A	1979-01-01	188/8995	0.812878	0.8413	0.57443	404122	1
bta05207	Chemical carcinogenesis - receptor activation	1979-01-01	216/8995	0.85466	0.878401	0.599761	281832	1
bta05169	Epstein-Barr virus infection	1979-01-01	235/8995	0.877618	0.895135	0.611188	280955	1
bta04714	Thermogenesis	1979-01-01	240/8995	0.883039	0.895135	0.611188	404122	1
bta05165	Human papillomavirus infection	1979-01-01	352/8995	0.957897	0.964414	0.65849	505242	1
bta05168	Herpes simplex virus 1 infection	1979-01-01	416/8995	0.976657	0.976657	0.66685	537706	1
