# Supplementary material for: Development of a bioinformatics platform for analysis of quantitative transcriptomics and proteomics data: the OMnalysis
Source: PeerJ. 2021 Nov 9;9:e12415. doi: 10.7717/peerj.12415 (PMC8588854; doi:10.7717/peerj.12415)
Supplement: Supplemental Information 19 [file peerj-09-12415-s019.xlsx]

## Sheet: GSEA pathway treatment 1
ID	Description	setSize	enrichmentScore	NES	pvalue	p.adjust	qvalues	rank	leading_edge	core_enrichment
bta04621	NOD-like receptor signaling pathway	7	0.85	1.84398	0.00139596	0.0023266	NA	10	tags=100%, list=37%, signal=85%	317650/281037/282164/112441458/112443481/282166/282165
bta04970	Salivary secretion	7	0.85	1.84398	0.00139596	0.0023266	NA	10	tags=100%, list=37%, signal=85%	317650/281037/282164/112441458/112443481/282166/282165
bta05152	Tuberculosis	7	0.85	1.84398	0.00139596	0.0023266	NA	10	tags=100%, list=37%, signal=85%	317650/281037/282164/112441458/112443481/282166/282165
bta05150	Staphylococcus aureus infection	8	0.815971	1.83964	0.00191178	0.00238973	NA	10	tags=88%, list=37%, signal=78%	317650/281037/282164/112441458/112443481/282166/282165
bta04613	Neutrophil extracellular trap formation	8	0.791579	1.78465	0.00323461	0.00323461	NA	10	tags=88%, list=37%, signal=78%	317650/281037/282164/112441458/112443481/282166/282165

## Sheet: GSEA pathway treatment 2
ID	Description	setSize	enrichmentScore	NES	pvalue	p.adjust	qvalues	rank	leading_edge	core_enrichment
bta04621	NOD-like receptor signaling pathway	7	0.969697	2.23255	1.11191e-06	2.34111e-06	NA	8	tags=100%, list=20%, signal=97%	317650/282164/281037/112441458/282166/112443481/282165
bta05152	Tuberculosis	7	0.969697	2.23255	1.11191e-06	2.34111e-06	NA	8	tags=100%, list=20%, signal=97%	317650/282164/281037/112441458/282166/112443481/282165
bta04970	Salivary secretion	8	0.946149	2.23665	1.63193e-06	2.34111e-06	NA	8	tags=88%, list=20%, signal=88%	317650/282164/281037/112441458/282166/112443481/282165
bta05150	Staphylococcus aureus infection	8	0.944421	2.23257	1.87288e-06	2.34111e-06	NA	8	tags=88%, list=20%, signal=88%	317650/282164/281037/112441458/282166/112443481/282165
bta04613	Neutrophil extracellular trap formation	8	0.913611	2.15973	1.20049e-05	1.20049e-05	NA	8	tags=88%, list=20%, signal=88%	317650/282164/281037/112441458/282166/112443481/282165

## Sheet: GSEA pathway treatment 3
ID	Description	setSize	enrichmentScore	NES	pvalue	p.adjust	qvalues	rank	leading_edge	core_enrichment
bta05150	Staphylococcus aureus infection	9	0.886498	2.42349	7.57959e-07	1.8191e-05	1.43613e-05	10	tags=78%, list=11%, signal=77%	317650/281037/112441458/282164/282166/112443481/282165
bta04613	Neutrophil extracellular trap formation	9	0.846378	2.31382	8.52432e-06	0.000102292	8.07567e-05	10	tags=78%, list=11%, signal=77%	317650/281037/112441458/282164/282166/112443481/282165
bta04970	Salivary secretion	11	0.758944	2.23731	5.42232e-05	0.000433785	0.000342462	27	tags=91%, list=31%, signal=72%	317650/281037/112441458/282164/282166/112443481/282165/100297344/617095/520277
bta04621	NOD-like receptor signaling pathway	10	0.762761	2.16481	0.0001093	0.000655801	0.000517737	23	tags=90%, list=26%, signal=75%	317650/281037/112441458/282164/282166/112443481/282165/281832/282125
bta05152	Tuberculosis	12	0.68	2.03888	0.000625358	0.00300172	0.00236978	36	tags=100%, list=41%, signal=68%	317650/281037/112441458/282164/282166/112443481/282165/100297344/617095/520277/282196/327711

## Sheet: GSEA pathway treatment 4
ID	Description	setSize	enrichmentScore	NES	pvalue	p.adjust	qvalues	rank	leading_edge	core_enrichment
bta04970	Salivary secretion	12	0.885772	2.75995	2.39765e-09	7.67249e-08	5.30007e-08	18	tags=83%, list=16%, signal=78%	317650/282164/112441458/281037/282166/112443481/100297344/520277/617095/282165
bta05152	Tuberculosis	12	0.799238	2.49032	9.35428e-07	1.49669e-05	1.03389e-05	18	tags=83%, list=16%, signal=78%	317650/282164/112441458/281037/282166/112443481/100297344/520277/617095/282165
bta05150	Staphylococcus aureus infection	9	0.789486	2.21748	1.72572e-05	0.000184077	0.000127159	18	tags=78%, list=16%, signal=71%	317650/282164/112441458/281037/282166/112443481/282165
bta04613	Neutrophil extracellular trap formation	9	0.750028	2.10666	8.90381e-05	0.000712305	0.000492053	18	tags=78%, list=16%, signal=71%	317650/282164/112441458/281037/282166/112443481/282165
bta04621	NOD-like receptor signaling pathway	11	0.721147	2.18127	0.000112114	0.000717527	0.00049566	24	tags=82%, list=22%, signal=71%	317650/282164/112441458/281037/282166/112443481/281832/282165/282125
bta05133	Pertussis	5	0.761836	1.78094	0.00777467	0.0414649	0.0286435	16	tags=80%, list=15%, signal=72%	534553/100297344/520277/617095
